# Supplementary material
Source: PubMed Central journal article supplement (PMC7095315)
Supplement: 41586_2012_BFnature11228_MOESM47_ESM.pdf [file 41586_2012_BFnature11228_MOESM47_ESM.pdf]

## Supplementary Table 1. OTU list of *Ace2*<sup>+y</sup> and *Ace2*<sup>-y</sup> mice with or without di-peptidic tryptophan supplemented diet.

Data are shown as the number of occurrences for each OTU detected by 454 sequencing.

| OTUs                | <i>Ace2</i> <sup>-y</sup> # 1 | <i>Ace2</i> <sup>-y</sup> # 2 | <i>Ace2</i> <sup>-y</sup> # 3 | <i>Ace2</i> <sup>-y</sup> # 4 | <i>Ace2</i> <sup>-y</sup> # 5 | <i>Ace2</i> <sup>-y</sup> # 6 | <i>Ace2</i> <sup>-y</sup> + TRP # 1 | <i>Ace2</i> <sup>-y</sup> + TRP # 2 | <i>Ace2</i> <sup>-y</sup> + TRP # 3 | <i>Ace2</i> <sup>-y</sup> + TRP # 4 | <i>Ace2</i> <sup>-y</sup> + TRP # 5 | <i>Ace2</i> <sup>+y</sup> # 1 | <i>Ace2</i> <sup>+y</sup> # 2 | <i>Ace2</i> <sup>+y</sup> # 3 | <i>Ace2</i> <sup>+y</sup> # 4 | <i>Ace2</i> <sup>+y</sup> # 5 | <i>Ace2</i> <sup>+y</sup> + TRP # 1 | <i>Ace2</i> <sup>+y</sup> + TRP # 2 | <i>Ace2</i> <sup>+y</sup> + TRP # 3 | <i>Ace2</i> <sup>+y</sup> + TRP # 4 |
|---------------------|-------------------------------|-------------------------------|-------------------------------|-------------------------------|-------------------------------|-------------------------------|-------------------------------------|-------------------------------------|-------------------------------------|-------------------------------------|-------------------------------------|-------------------------------|-------------------------------|-------------------------------|-------------------------------|-------------------------------|-------------------------------------|-------------------------------------|-------------------------------------|-------------------------------------|
| Paludibacter_OTU#1  | 1                             | 0                             | 0                             | 0                             | 0                             | 0                             | 0                                   | 0                                   | 0                                   | 0                                   | 0                                   | 0                             | 0                             | 0                             | 0                             | 0                             | 0                                   | 0                                   | 0                                   | 0                                   |
| Barnesiella_OTU#2   | 1                             | 0                             | 0                             | 0                             | 0                             | 0                             | 0                                   | 0                                   | 0                                   | 0                                   | 0                                   | 0                             | 0                             | 0                             | 0                             | 0                             | 0                                   | 0                                   | 0                                   | 0                                   |
| Rikenella_OTU#3     | 1                             | 0                             | 0                             | 0                             | 0                             | 0                             | 0                                   | 0                                   | 0                                   | 0                                   | 0                                   | 0                             | 0                             | 0                             | 0                             | 0                             | 0                                   | 0                                   | 0                                   | 0                                   |
| Paludibacter_OTU#4  | 1                             | 0                             | 0                             | 0                             | 0                             | 0                             | 0                                   | 0                                   | 0                                   | 0                                   | 0                                   | 0                             | 0                             | 0                             | 0                             | 0                             | 0                                   | 0                                   | 0                                   | 0                                   |
| Allobaculum_OTU#5   | 1                             | 0                             | 0                             | 0                             | 0                             | 0                             | 0                                   | 0                                   | 0                                   | 0                                   | 0                                   | 0                             | 0                             | 0                             | 0                             | 0                             | 0                                   | 0                                   | 0                                   | 0                                   |
| Paludibacter_OTU#6  | 1                             | 0                             | 0                             | 0                             | 0                             | 0                             | 0                                   | 0                                   | 0                                   | 0                                   | 0                                   | 0                             | 0                             | 0                             | 0                             | 0                             | 0                                   | 0                                   | 0                                   | 0                                   |
| Paludibacter_OTU#7  | 1                             | 0                             | 0                             | 0                             | 0                             | 0                             | 0                                   | 1                                   | 0                                   | 0                                   | 0                                   | 0                             | 0                             | 0                             | 0                             | 0                             | 0                                   | 0                                   | 0                                   | 0                                   |
| Barnesiella_OTU#8   | 1                             | 0                             | 0                             | 0                             | 0                             | 0                             | 0                                   | 0                                   | 0                                   | 0                                   | 0                                   | 0                             | 0                             | 0                             | 0                             | 0                             | 0                                   | 0                                   | 0                                   | 0                                   |
| Limibacter_OTU#9    | 1                             | 0                             | 0                             | 0                             | 0                             | 0                             | 1                                   | 0                                   | 0                                   | 0                                   | 0                                   | 0                             | 0                             | 0                             | 0                             | 0                             | 0                                   | 0                                   | 0                                   | 0                                   |
| Costertonia_OTU#10  | 1                             | 0                             | 0                             | 0                             | 0                             | 0                             | 0                                   | 0                                   | 0                                   | 0                                   | 0                                   | 0                             | 0                             | 0                             | 0                             | 0                             | 0                                   | 0                                   | 0                                   | 0                                   |
| Paludibacter_OTU#11 | 1                             | 0                             | 0                             | 0                             | 0                             | 0                             | 0                                   | 0                                   | 0                                   | 0                                   | 0                                   | 0                             | 0                             | 0                             | 0                             | 0                             | 0                                   | 0                                   | 0                                   | 0                                   |
| Dorea_OTU#12        | 1                             | 0                             | 0                             | 0                             | 0                             | 0                             | 0                                   | 0                                   | 0                                   | 0                                   | 0                                   | 0                             | 0                             | 0                             | 0                             | 0                             | 0                                   | 0                                   | 0                                   | 0                                   |
| Limibacter_OTU#13   | 1                             | 0                             | 0                             | 0                             | 0                             | 0                             | 0                                   | 0                                   | 0                                   | 0                                   | 0                                   | 0                             | 0                             | 0                             | 0                             | 0                             | 0                                   | 0                                   | 0                                   | 0                                   |
| Barnesiella_OTU#14  | 1                             | 0                             | 0                             | 0                             | 0                             | 0                             | 0                                   | 0                                   | 0                                   | 0                                   | 0                                   | 0                             | 0                             | 0                             | 0                             | 0                             | 0                                   | 0                                   | 0                                   | 0                                   |
| Allobaculum_OTU#15  | 1                             | 0                             | 0                             | 0                             | 0                             | 0                             | 0                                   | 0                                   | 0                                   | 0                                   | 0                                   | 0                             | 0                             | 0                             | 0                             | 0                             | 0                                   | 0                                   | 0                                   | 0                                   |
| Rikenella_OTU#16    | 1                             | 0                             | 0                             | 0                             | 0                             | 0                             | 0                                   | 0                                   | 0                                   | 0                                   | 0                                   | 0                             | 0                             | 0                             | 0                             | 0                             | 0                                   | 0                                   | 0                                   | 0                                   |
| Allobaculum_OTU#17  | 1                             | 0                             | 0                             | 0                             | 0                             | 0                             | 0                                   | 0                                   | 0                                   | 0                                   | 0                                   | 0                             | 0                             | 0                             | 0                             | 0                             | 0                                   | 0                                   | 0                                   | 0                                   |
| Barnesiella_OTU#18  | 1                             | 0                             | 0                             | 0                             | 0                             | 0                             | 0                                   | 0                                   | 0                                   | 0                                   | 0                                   | 0                             | 0                             | 0                             | 0                             | 0                             | 0                                   | 0                                   | 0                                   | 0                                   |
| Paludibacter_OTU#19 | 1                             | 0                             | 0                             | 0                             | 0                             | 0                             | 0                                   | 0                                   | 0                                   | 0                                   | 0                                   | 0                             | 0                             | 0                             | 0                             | 0                             | 0                                   | 0                                   | 0                                   | 0                                   |
| Paludibacter_OTU#20 | 1                             | 0                             | 0                             | 0                             | 0                             | 0                             | 0                                   | 0                                   | 0                                   | 0                                   | 0                                   | 0                             | 0                             | 0                             | 0                             | 0                             | 0                                   | 0                                   | 0                                   | 0                                   |
| Limibacter_OTU#21   | 1                             | 0                             | 0                             | 0                             | 0                             | 0                             | 0                                   | 0                                   | 0                                   | 0                                   | 0                                   | 0                             | 0                             | 0                             | 0                             | 0                             | 0                                   | 0                                   | 0                                   | 0                                   |
| Anaerophaga_OTU#22  | 0                             | 0                             | 0                             | 0                             | 0                             | 0                             | 0                                   | 0                                   | 0                                   | 0                                   | 1                                   | 0                             | 0                             | 0                             | 0                             | 0                             | 0                                   | 0                                   | 0                                   | 0                                   |
| Paludibacter_OTU#23 | 0                             | 0                             | 0                             | 0                             | 0                             | 0                             | 0                                   | 0                                   | 0                                   | 0                                   | 1                                   | 0                             | 0                             | 0                             | 0                             | 0                             | 0                                   | 0                                   | 0                                   | 0                                   |
| Paludibacter_OTU#24 | 0                             | 0                             | 0                             | 0                             | 0                             | 0                             | 0                                   | 0                                   | 0                                   | 0                                   | 1                                   | 0                             | 0                             | 0                             | 0                             | 0                             | 0                                   | 0                                   | 0                                   | 0                                   |

|                       |   |   |   |   |   |   |   |   |   |   |   |   |   |   |   |   |   |   |   |   |
|-----------------------|---|---|---|---|---|---|---|---|---|---|---|---|---|---|---|---|---|---|---|---|
| Paludibacter_OTU#25   | 0 | 0 | 0 | 0 | 0 | 0 | 0 | 0 | 0 | 0 | 1 | 0 | 0 | 0 | 0 | 0 | 0 | 0 | 0 | 0 |
| Limibacter_OTU#26     | 0 | 0 | 0 | 0 | 0 | 0 | 0 | 0 | 0 | 0 | 1 | 0 | 0 | 0 | 0 | 0 | 0 | 0 | 0 | 0 |
| Paludibacter_OTU#27   | 0 | 0 | 0 | 0 | 0 | 0 | 0 | 0 | 0 | 0 | 1 | 0 | 0 | 0 | 0 | 0 | 0 | 0 | 0 | 0 |
| Paludibacter_OTU#28   | 0 | 0 | 0 | 0 | 0 | 0 | 0 | 0 | 0 | 0 | 1 | 0 | 0 | 0 | 0 | 0 | 0 | 0 | 0 | 0 |
| Paludibacter_OTU#29   | 0 | 0 | 0 | 0 | 0 | 0 | 0 | 0 | 0 | 0 | 1 | 0 | 0 | 0 | 0 | 0 | 0 | 0 | 0 | 0 |
| Barnesiella_OTU#30    | 0 | 0 | 0 | 0 | 0 | 0 | 0 | 0 | 0 | 0 | 2 | 0 | 0 | 0 | 0 | 0 | 0 | 0 | 0 | 0 |
| Roseburia_OTU#31      | 0 | 0 | 0 | 0 | 0 | 0 | 0 | 0 | 0 | 0 | 1 | 0 | 0 | 0 | 0 | 0 | 0 | 0 | 0 | 0 |
| Paludibacter_OTU#32   | 0 | 0 | 0 | 0 | 0 | 0 | 0 | 0 | 0 | 0 | 1 | 0 | 0 | 0 | 0 | 0 | 0 | 0 | 0 | 0 |
| Rikenella_OTU#33      | 0 | 0 | 0 | 0 | 0 | 0 | 0 | 0 | 0 | 0 | 1 | 0 | 0 | 0 | 0 | 0 | 0 | 0 | 0 | 0 |
| Barnesiella_OTU#34    | 0 | 0 | 0 | 0 | 0 | 0 | 0 | 0 | 0 | 0 | 1 | 0 | 0 | 0 | 0 | 0 | 0 | 0 | 0 | 0 |
| Paludibacter_OTU#35   | 0 | 0 | 0 | 0 | 0 | 0 | 0 | 0 | 0 | 0 | 1 | 0 | 0 | 0 | 0 | 0 | 0 | 0 | 0 | 0 |
| Tannerella_OTU#36     | 0 | 0 | 0 | 0 | 1 | 0 | 0 | 0 | 0 | 0 | 3 | 0 | 0 | 0 | 1 | 0 | 0 | 0 | 1 | 0 |
| Paludibacter_OTU#37   | 0 | 0 | 0 | 0 | 0 | 0 | 0 | 0 | 0 | 0 | 1 | 0 | 0 | 0 | 0 | 0 | 0 | 0 | 0 | 0 |
| Tannerella_OTU#38     | 0 | 0 | 0 | 0 | 0 | 0 | 0 | 0 | 0 | 0 | 1 | 0 | 0 | 0 | 0 | 0 | 0 | 0 | 0 | 0 |
| Paludibacter_OTU#39   | 0 | 0 | 0 | 0 | 0 | 0 | 0 | 0 | 0 | 0 | 1 | 0 | 0 | 0 | 0 | 0 | 0 | 0 | 0 | 0 |
| Paludibacter_OTU#40   | 0 | 0 | 0 | 0 | 0 | 0 | 0 | 0 | 0 | 0 | 3 | 0 | 0 | 0 | 0 | 0 | 0 | 0 | 0 | 0 |
| Paludibacter_OTU#41   | 0 | 0 | 0 | 0 | 0 | 0 | 0 | 0 | 0 | 0 | 1 | 0 | 0 | 0 | 0 | 0 | 0 | 0 | 0 | 0 |
| Paludibacter_OTU#42   | 0 | 0 | 0 | 0 | 0 | 0 | 0 | 0 | 0 | 0 | 1 | 0 | 0 | 0 | 0 | 0 | 0 | 0 | 0 | 0 |
| Paludibacter_OTU#43   | 0 | 0 | 0 | 0 | 0 | 0 | 0 | 0 | 0 | 0 | 1 | 0 | 0 | 0 | 0 | 0 | 0 | 0 | 0 | 0 |
| Paludibacter_OTU#44   | 0 | 0 | 0 | 0 | 0 | 0 | 0 | 0 | 0 | 0 | 1 | 0 | 0 | 0 | 0 | 0 | 0 | 0 | 0 | 0 |
| Paludibacter_OTU#45   | 0 | 0 | 0 | 0 | 0 | 0 | 0 | 0 | 0 | 0 | 1 | 0 | 0 | 0 | 0 | 0 | 0 | 0 | 0 | 0 |
| Paludibacter_OTU#46   | 0 | 0 | 0 | 0 | 0 | 0 | 0 | 0 | 0 | 0 | 1 | 0 | 0 | 0 | 0 | 0 | 0 | 0 | 0 | 0 |
| Blautia_OTU#47        | 0 | 0 | 0 | 0 | 0 | 0 | 0 | 0 | 0 | 0 | 3 | 0 | 0 | 0 | 0 | 0 | 0 | 0 | 0 | 0 |
| Paludibacter_OTU#48   | 0 | 0 | 0 | 0 | 0 | 0 | 0 | 0 | 0 | 0 | 1 | 0 | 0 | 0 | 0 | 0 | 0 | 0 | 0 | 0 |
| Tannerella_OTU#49     | 0 | 0 | 0 | 0 | 0 | 0 | 0 | 0 | 0 | 0 | 1 | 0 | 0 | 0 | 0 | 0 | 0 | 0 | 0 | 0 |
| Paludibacter_OTU#50   | 0 | 0 | 0 | 0 | 0 | 0 | 0 | 0 | 0 | 0 | 1 | 0 | 0 | 0 | 0 | 0 | 0 | 0 | 0 | 0 |
| Paludibacter_OTU#51   | 0 | 0 | 0 | 0 | 0 | 0 | 0 | 0 | 0 | 0 | 1 | 0 | 0 | 0 | 0 | 0 | 0 | 0 | 0 | 0 |
| Paludibacter_OTU#52   | 0 | 0 | 0 | 0 | 0 | 0 | 0 | 0 | 0 | 0 | 2 | 0 | 0 | 0 | 0 | 0 | 0 | 0 | 0 | 0 |
| Blautia_OTU#53        | 0 | 0 | 0 | 0 | 0 | 0 | 0 | 0 | 0 | 0 | 4 | 0 | 0 | 0 | 0 | 0 | 0 | 0 | 0 | 0 |
| Paludibacter_OTU#54   | 0 | 0 | 0 | 0 | 0 | 0 | 0 | 0 | 0 | 0 | 4 | 0 | 0 | 0 | 0 | 0 | 0 | 0 | 0 | 0 |
| Bacteroides_OTU#55    | 0 | 0 | 0 | 0 | 0 | 0 | 0 | 0 | 0 | 0 | 1 | 0 | 0 | 0 | 0 | 0 | 0 | 0 | 0 | 0 |
| Paludibacter_OTU#56   | 0 | 0 | 0 | 0 | 0 | 0 | 0 | 0 | 0 | 0 | 1 | 0 | 0 | 0 | 0 | 0 | 0 | 0 | 0 | 0 |
| Paraprevotella_OTU#57 | 0 | 0 | 0 | 0 | 0 | 0 | 0 | 0 | 0 | 0 | 1 | 0 | 0 | 0 | 0 | 0 | 0 | 0 | 0 | 0 |

Supplementary Table 1

|                                           |   |   |   |   |   |   |   |   |   |   |    |   |   |   |   |   |   |   |   |   |
|-------------------------------------------|---|---|---|---|---|---|---|---|---|---|----|---|---|---|---|---|---|---|---|---|
| Paludibacter_OTU#58                       | 0 | 0 | 0 | 0 | 0 | 0 | 0 | 0 | 0 | 0 | 1  | 0 | 0 | 0 | 0 | 0 | 0 | 0 | 0 | 0 |
| Paludibacter_OTU#59                       | 0 | 0 | 0 | 0 | 0 | 0 | 0 | 0 | 0 | 0 | 1  | 0 | 0 | 0 | 0 | 0 | 0 | 0 | 0 | 0 |
| Paludibacter_OTU#60                       | 0 | 0 | 0 | 0 | 0 | 0 | 0 | 0 | 0 | 0 | 1  | 0 | 0 | 0 | 0 | 0 | 0 | 0 | 0 | 0 |
| Paludibacter_OTU#61                       | 0 | 0 | 0 | 0 | 0 | 0 | 0 | 0 | 0 | 0 | 4  | 0 | 0 | 0 | 0 | 0 | 0 | 0 | 0 | 0 |
| Unclassified<br>Porphyromonadaceae_OTU#62 | 0 | 0 | 0 | 0 | 0 | 0 | 0 | 0 | 0 | 0 | 2  | 0 | 0 | 0 | 0 | 0 | 0 | 0 | 0 | 0 |
| Paludibacter_OTU#63                       | 0 | 0 | 0 | 0 | 0 | 0 | 0 | 0 | 1 | 0 | 1  | 0 | 0 | 0 | 0 | 0 | 0 | 0 | 0 | 0 |
| Paludibacter_OTU#64                       | 0 | 0 | 0 | 0 | 0 | 0 | 0 | 0 | 0 | 0 | 5  | 0 | 0 | 0 | 0 | 0 | 0 | 0 | 0 | 0 |
| Paludibacter_OTU#65                       | 0 | 0 | 0 | 0 | 0 | 0 | 0 | 0 | 0 | 0 | 3  | 0 | 0 | 0 | 0 | 0 | 0 | 0 | 0 | 0 |
| Barnesiella_OTU#66                        | 0 | 0 | 0 | 0 | 0 | 0 | 0 | 0 | 0 | 0 | 1  | 0 | 0 | 0 | 0 | 0 | 0 | 0 | 0 | 0 |
| Paludibacter_OTU#67                       | 0 | 0 | 0 | 0 | 0 | 0 | 0 | 0 | 0 | 0 | 2  | 0 | 0 | 0 | 0 | 0 | 0 | 0 | 0 | 0 |
| Tannerella_OTU#68                         | 0 | 0 | 0 | 0 | 0 | 0 | 0 | 0 | 0 | 0 | 12 | 0 | 1 | 0 | 0 | 0 | 0 | 0 | 0 | 0 |
| Paludibacter_OTU#69                       | 0 | 0 | 0 | 0 | 0 | 0 | 0 | 0 | 0 | 0 | 3  | 0 | 0 | 0 | 0 | 0 | 0 | 0 | 0 | 0 |
| Paludibacter_OTU#70                       | 0 | 0 | 0 | 0 | 0 | 0 | 0 | 0 | 0 | 0 | 2  | 0 | 0 | 0 | 0 | 0 | 0 | 0 | 0 | 0 |
| Paludibacter_OTU#71                       | 0 | 0 | 0 | 0 | 0 | 0 | 0 | 0 | 0 | 0 | 1  | 0 | 0 | 0 | 0 | 0 | 0 | 0 | 0 | 0 |
| Paludibacter_OTU#72                       | 0 | 0 | 0 | 0 | 0 | 0 | 0 | 0 | 0 | 0 | 1  | 0 | 0 | 0 | 0 | 0 | 0 | 0 | 0 | 0 |
| Limibacter_OTU#73                         | 0 | 1 | 0 | 0 | 0 | 0 | 0 | 0 | 0 | 0 | 0  | 0 | 0 | 0 | 0 | 0 | 0 | 0 | 0 | 0 |
| Limibacter_OTU#74                         | 0 | 1 | 0 | 0 | 0 | 0 | 0 | 0 | 0 | 0 | 0  | 0 | 0 | 0 | 0 | 0 | 0 | 0 | 0 | 0 |
| Kordia_OTU#75                             | 0 | 1 | 0 | 0 | 0 | 0 | 0 | 0 | 0 | 0 | 0  | 0 | 0 | 0 | 0 | 0 | 0 | 0 | 0 | 0 |
| Anaerophaga_OTU#76                        | 0 | 1 | 0 | 0 | 0 | 0 | 0 | 0 | 0 | 0 | 0  | 0 | 0 | 0 | 0 | 0 | 0 | 0 | 0 | 0 |
| Flagellimonas_OTU#77                      | 0 | 1 | 0 | 0 | 0 | 0 | 0 | 0 | 0 | 0 | 0  | 0 | 0 | 0 | 0 | 0 | 0 | 0 | 0 | 0 |
| Anaerophaga_OTU#78                        | 0 | 1 | 0 | 0 | 0 | 0 | 0 | 0 | 0 | 0 | 0  | 0 | 0 | 0 | 0 | 0 | 0 | 0 | 0 | 0 |
| Limibacter_OTU#79                         | 0 | 1 | 0 | 0 | 0 | 0 | 0 | 0 | 0 | 0 | 0  | 0 | 0 | 0 | 0 | 0 | 0 | 0 | 0 | 0 |
| Paludibacter_OTU#80                       | 0 | 1 | 0 | 0 | 0 | 0 | 0 | 0 | 0 | 0 | 0  | 0 | 0 | 0 | 0 | 0 | 0 | 0 | 0 | 0 |
| Paludibacter_OTU#81                       | 0 | 1 | 0 | 0 | 0 | 0 | 0 | 0 | 0 | 0 | 0  | 0 | 0 | 0 | 0 | 0 | 0 | 0 | 0 | 0 |
| Paludibacter_OTU#82                       | 0 | 1 | 0 | 0 | 0 | 0 | 0 | 0 | 0 | 0 | 0  | 0 | 0 | 0 | 0 | 0 | 0 | 0 | 0 | 0 |
| Unclassified<br>Porphyromonadaceae_OTU#83 | 0 | 1 | 0 | 0 | 0 | 0 | 0 | 0 | 0 | 0 | 1  | 0 | 0 | 0 | 0 | 0 | 0 | 0 | 0 | 0 |
| Tannerella_OTU#84                         | 0 | 1 | 0 | 0 | 0 | 0 | 0 | 0 | 0 | 0 | 0  | 0 | 0 | 0 | 0 | 0 | 0 | 0 | 0 | 0 |
| Paludibacter_OTU#85                       | 0 | 1 | 0 | 0 | 0 | 0 | 0 | 0 | 0 | 0 | 0  | 0 | 0 | 0 | 0 | 0 | 0 | 0 | 0 | 0 |
| Paludibacter_OTU#86                       | 0 | 1 | 0 | 0 | 0 | 0 | 0 | 0 | 0 | 0 | 0  | 0 | 0 | 0 | 0 | 0 | 0 | 0 | 0 | 0 |
| Paludibacter_OTU#87                       | 0 | 1 | 0 | 0 | 0 | 0 | 0 | 0 | 0 | 0 | 0  | 0 | 0 | 0 | 0 | 0 | 0 | 0 | 0 | 0 |
| Paludibacter_OTU#88                       | 0 | 1 | 0 | 0 | 0 | 0 | 0 | 0 | 0 | 0 | 0  | 0 | 0 | 0 | 0 | 0 | 0 | 0 | 0 | 0 |
| Anaerophaga_OTU#89                        | 0 | 1 | 0 | 0 | 0 | 0 | 0 | 0 | 0 | 0 | 0  | 0 | 0 | 0 | 0 | 0 | 0 | 0 | 0 | 0 |

Supplementary Table 1

|                        |   |   |   |   |   |   |   |   |   |   |   |   |   |   |   |   |   |   |   |   |
|------------------------|---|---|---|---|---|---|---|---|---|---|---|---|---|---|---|---|---|---|---|---|
| Paludibacter_OTU#90    | 0 | 1 | 0 | 0 | 0 | 0 | 0 | 0 | 0 | 0 | 0 | 0 | 0 | 0 | 0 | 0 | 0 | 0 | 0 | 0 |
| Paludibacter_OTU#91    | 0 | 1 | 0 | 0 | 0 | 0 | 0 | 0 | 0 | 0 | 0 | 0 | 0 | 0 | 0 | 0 | 0 | 0 | 0 | 0 |
| Barnesiella_OTU#92     | 0 | 1 | 0 | 0 | 0 | 0 | 0 | 0 | 0 | 0 | 0 | 0 | 0 | 0 | 0 | 0 | 0 | 0 | 0 | 0 |
| Anaerophaga_OTU#93     | 0 | 1 | 0 | 0 | 0 | 0 | 0 | 0 | 0 | 0 | 0 | 0 | 0 | 0 | 0 | 0 | 0 | 0 | 0 | 0 |
| Limibacter_OTU#94      | 2 | 2 | 0 | 1 | 0 | 0 | 0 | 0 | 0 | 0 | 0 | 0 | 0 | 0 | 0 | 0 | 0 | 0 | 0 | 0 |
| Barnesiella_OTU#95     | 0 | 1 | 0 | 0 | 0 | 0 | 0 | 0 | 1 | 1 | 2 | 0 | 0 | 0 | 0 | 0 | 0 | 0 | 0 | 0 |
| Paludibacter_OTU#96    | 0 | 1 | 0 | 0 | 0 | 0 | 0 | 0 | 0 | 0 | 0 | 0 | 0 | 0 | 0 | 0 | 0 | 0 | 0 | 0 |
| Paludibacter_OTU#97    | 0 | 1 | 0 | 0 | 0 | 0 | 0 | 0 | 0 | 0 | 0 | 0 | 0 | 0 | 0 | 0 | 0 | 0 | 0 | 0 |
| Allobaculum_OTU#98     | 0 | 1 | 0 | 0 | 0 | 0 | 0 | 0 | 0 | 0 | 0 | 0 | 0 | 0 | 0 | 0 | 0 | 0 | 0 | 0 |
| Anaerophaga_OTU#99     | 0 | 1 | 0 | 0 | 0 | 0 | 0 | 0 | 0 | 0 | 0 | 0 | 0 | 0 | 0 | 0 | 0 | 0 | 0 | 0 |
| Paludibacter_OTU#100   | 0 | 1 | 0 | 0 | 0 | 0 | 0 | 0 | 0 | 0 | 0 | 0 | 0 | 0 | 0 | 0 | 0 | 0 | 0 | 0 |
| Lawsonia_OTU#101       | 0 | 1 | 0 | 0 | 0 | 0 | 0 | 0 | 0 | 0 | 0 | 0 | 0 | 0 | 0 | 0 | 0 | 0 | 0 | 0 |
| Allobaculum_OTU#102    | 0 | 1 | 0 | 0 | 0 | 0 | 0 | 0 | 0 | 0 | 0 | 0 | 0 | 0 | 0 | 0 | 0 | 0 | 0 | 0 |
| Paludibacter_OTU#103   | 0 | 1 | 0 | 0 | 0 | 0 | 0 | 0 | 0 | 0 | 0 | 0 | 0 | 0 | 0 | 0 | 0 | 0 | 0 | 0 |
| Limibacter_OTU#104     | 0 | 1 | 0 | 0 | 0 | 0 | 0 | 0 | 0 | 0 | 0 | 0 | 0 | 0 | 0 | 0 | 0 | 0 | 0 | 0 |
| Paludibacter_OTU#105   | 1 | 1 | 0 | 0 | 0 | 0 | 0 | 0 | 0 | 0 | 0 | 0 | 0 | 0 | 0 | 0 | 0 | 0 | 0 | 0 |
| Paludibacter_OTU#106   | 0 | 1 | 0 | 0 | 0 | 0 | 0 | 0 | 0 | 0 | 1 | 0 | 0 | 0 | 0 | 0 | 0 | 0 | 0 | 0 |
| Anaerophaga_OTU#107    | 0 | 1 | 0 | 0 | 0 | 0 | 0 | 0 | 0 | 0 | 0 | 0 | 0 | 0 | 0 | 0 | 0 | 0 | 0 | 0 |
| Paludibacter_OTU#108   | 0 | 1 | 0 | 0 | 0 | 0 | 0 | 0 | 0 | 0 | 1 | 0 | 0 | 0 | 0 | 0 | 0 | 0 | 0 | 0 |
| Paludibacter_OTU#109   | 0 | 1 | 0 | 0 | 0 | 0 | 0 | 0 | 0 | 0 | 0 | 0 | 0 | 0 | 0 | 0 | 0 | 0 | 0 | 0 |
| Rikenella_OTU#110      | 0 | 1 | 0 | 0 | 0 | 0 | 0 | 0 | 0 | 0 | 0 | 0 | 0 | 0 | 0 | 0 | 0 | 0 | 0 | 0 |
| Parasutterella_OTU#111 | 0 | 1 | 0 | 0 | 0 | 0 | 0 | 0 | 0 | 0 | 0 | 0 | 0 | 0 | 0 | 0 | 0 | 0 | 0 | 0 |
| Parasutterella_OTU#112 | 0 | 2 | 0 | 0 | 0 | 0 | 0 | 0 | 0 | 0 | 0 | 0 | 0 | 0 | 0 | 0 | 0 | 0 | 0 | 0 |
| Paludibacter_OTU#113   | 0 | 1 | 0 | 0 | 0 | 0 | 0 | 0 | 0 | 0 | 0 | 0 | 0 | 0 | 0 | 0 | 0 | 0 | 0 | 0 |
| Allobaculum_OTU#114    | 0 | 1 | 0 | 0 | 0 | 0 | 0 | 0 | 0 | 0 | 0 | 0 | 0 | 0 | 0 | 0 | 0 | 0 | 0 | 0 |
| Alistipes_OTU#115      | 0 | 1 | 0 | 0 | 0 | 0 | 0 | 0 | 0 | 0 | 0 | 0 | 0 | 0 | 0 | 0 | 0 | 0 | 0 | 0 |
| Anaerophaga_OTU#116    | 0 | 1 | 0 | 0 | 0 | 0 | 0 | 0 | 0 | 0 | 0 | 0 | 0 | 0 | 0 | 0 | 0 | 0 | 0 | 0 |
| Paludibacter_OTU#117   | 0 | 1 | 0 | 0 | 0 | 0 | 0 | 0 | 0 | 0 | 0 | 0 | 0 | 0 | 0 | 0 | 0 | 0 | 0 | 0 |
| Rikenella_OTU#118      | 0 | 1 | 0 | 0 | 0 | 0 | 0 | 0 | 0 | 0 | 0 | 0 | 0 | 0 | 0 | 0 | 0 | 0 | 0 | 0 |
| Paludibacter_OTU#119   | 0 | 1 | 0 | 0 | 0 | 0 | 0 | 0 | 0 | 0 | 0 | 0 | 0 | 0 | 0 | 0 | 0 | 0 | 0 | 0 |
| Barnesiella_OTU#120    | 0 | 1 | 0 | 0 | 0 | 0 | 0 | 0 | 0 | 0 | 0 | 0 | 0 | 0 | 0 | 0 | 0 | 0 | 0 | 0 |
| Limibacter_OTU#121     | 1 | 3 | 1 | 0 | 0 | 0 | 1 | 1 | 0 | 0 | 0 | 0 | 0 | 0 | 0 | 0 | 0 | 0 | 0 | 0 |
| Barnesiella_OTU#122    | 0 | 1 | 0 | 0 | 0 | 0 | 0 | 0 | 0 | 0 | 0 | 0 | 0 | 0 | 0 | 0 | 0 | 0 | 0 | 0 |

Supplementary Table 1

|                                    |   |   |   |   |   |   |   |   |   |   |   |   |   |   |   |   |   |   |   |   |
|------------------------------------|---|---|---|---|---|---|---|---|---|---|---|---|---|---|---|---|---|---|---|---|
| Paludibacter_OTU#123               | 0 | 1 | 0 | 0 | 0 | 0 | 0 | 0 | 0 | 0 | 0 | 0 | 0 | 0 | 0 | 0 | 0 | 0 | 0 | 0 |
| Anaerophaga_OTU#124                | 0 | 1 | 0 | 0 | 0 | 0 | 0 | 0 | 0 | 0 | 0 | 0 | 0 | 0 | 0 | 0 | 0 | 0 | 0 | 0 |
| Barnesiella_OTU#125                | 0 | 1 | 0 | 0 | 0 | 0 | 0 | 0 | 0 | 0 | 0 | 0 | 0 | 0 | 0 | 0 | 0 | 0 | 0 | 0 |
| Parasutterella_OTU#126             | 0 | 1 | 0 | 0 | 1 | 0 | 0 | 0 | 0 | 0 | 0 | 0 | 0 | 0 | 0 | 0 | 0 | 0 | 0 | 0 |
| Limibacter_OTU#127                 | 0 | 1 | 0 | 0 | 0 | 0 | 0 | 0 | 0 | 0 | 0 | 0 | 0 | 0 | 0 | 0 | 0 | 0 | 0 | 0 |
| Paludibacter_OTU#128               | 0 | 1 | 0 | 0 | 0 | 0 | 0 | 0 | 0 | 0 | 0 | 0 | 0 | 0 | 0 | 0 | 0 | 0 | 0 | 0 |
| Paludibacter_OTU#129               | 0 | 1 | 0 | 0 | 0 | 0 | 0 | 0 | 0 | 0 | 0 | 0 | 0 | 0 | 0 | 0 | 0 | 0 | 0 | 0 |
| Paludibacter_OTU#130               | 0 | 1 | 0 | 0 | 0 | 0 | 0 | 0 | 0 | 0 | 0 | 0 | 0 | 0 | 0 | 0 | 0 | 0 | 0 | 0 |
| Paludibacter_OTU#131               | 0 | 1 | 0 | 0 | 0 | 0 | 0 | 0 | 0 | 0 | 0 | 0 | 0 | 0 | 0 | 0 | 0 | 0 | 0 | 0 |
| Barnesiella_OTU#132                | 0 | 1 | 0 | 0 | 0 | 0 | 0 | 0 | 0 | 0 | 0 | 0 | 0 | 0 | 0 | 0 | 0 | 0 | 0 | 0 |
| Paludibacter_OTU#133               | 0 | 1 | 0 | 0 | 0 | 0 | 0 | 0 | 0 | 0 | 0 | 0 | 0 | 0 | 0 | 0 | 0 | 0 | 0 | 0 |
| Unclassified Bacteroidetes_OTU#134 | 1 | 1 | 0 | 0 | 0 | 0 | 0 | 0 | 0 | 0 | 0 | 0 | 0 | 0 | 0 | 0 | 0 | 0 | 0 | 0 |
| Aquiflexum_OTU#135                 | 0 | 2 | 0 | 0 | 0 | 0 | 0 | 0 | 0 | 0 | 0 | 0 | 0 | 0 | 0 | 0 | 0 | 0 | 0 | 0 |
| Paludibacter_OTU#136               | 0 | 2 | 0 | 0 | 0 | 0 | 0 | 0 | 0 | 0 | 0 | 0 | 0 | 0 | 0 | 0 | 0 | 1 | 0 | 0 |
| Limibacter_OTU#137                 | 0 | 1 | 0 | 0 | 0 | 0 | 0 | 0 | 0 | 0 | 0 | 0 | 0 | 0 | 0 | 0 | 0 | 0 | 0 | 0 |
| Allobaculum_OTU#138                | 0 | 1 | 0 | 0 | 0 | 0 | 0 | 0 | 0 | 0 | 0 | 0 | 0 | 0 | 0 | 0 | 0 | 0 | 0 | 0 |
| Paludibacter_OTU#139               | 0 | 1 | 0 | 0 | 0 | 0 | 0 | 0 | 0 | 0 | 0 | 0 | 0 | 0 | 0 | 0 | 0 | 0 | 0 | 0 |
| Paludibacter_OTU#140               | 0 | 1 | 0 | 0 | 0 | 0 | 0 | 0 | 0 | 0 | 0 | 0 | 0 | 0 | 0 | 0 | 0 | 0 | 0 | 0 |
| Barnesiella_OTU#141                | 0 | 1 | 0 | 0 | 0 | 0 | 0 | 0 | 0 | 0 | 0 | 0 | 0 | 0 | 0 | 0 | 0 | 0 | 0 | 0 |
| Allobaculum_OTU#142                | 0 | 1 | 0 | 0 | 0 | 0 | 0 | 0 | 0 | 1 | 0 | 0 | 0 | 0 | 0 | 0 | 0 | 0 | 0 | 0 |
| Paludibacter_OTU#143               | 0 | 1 | 0 | 0 | 0 | 0 | 0 | 0 | 0 | 0 | 0 | 0 | 0 | 0 | 0 | 0 | 0 | 0 | 0 | 0 |
| Barnesiella_OTU#144                | 0 | 1 | 0 | 0 | 0 | 0 | 0 | 0 | 0 | 0 | 0 | 0 | 0 | 0 | 0 | 0 | 0 | 0 | 0 | 0 |
| Limibacter_OTU#145                 | 0 | 1 | 0 | 0 | 0 | 0 | 0 | 0 | 0 | 0 | 0 | 0 | 0 | 0 | 0 | 0 | 0 | 0 | 0 | 0 |
| Anaerophaga_OTU#146                | 0 | 2 | 0 | 0 | 0 | 0 | 0 | 0 | 0 | 0 | 0 | 0 | 0 | 0 | 0 | 0 | 0 | 0 | 0 | 0 |
| Limibacter_OTU#147                 | 2 | 1 | 2 | 0 | 2 | 0 | 0 | 0 | 0 | 0 | 0 | 0 | 0 | 0 | 0 | 0 | 0 | 0 | 0 | 0 |
| Limibacter_OTU#148                 | 0 | 0 | 1 | 0 | 0 | 0 | 0 | 0 | 0 | 0 | 0 | 0 | 0 | 0 | 0 | 0 | 0 | 0 | 0 | 0 |
| Rikenella_OTU#149                  | 0 | 0 | 1 | 0 | 0 | 0 | 0 | 0 | 0 | 0 | 0 | 0 | 0 | 0 | 0 | 0 | 0 | 0 | 0 | 0 |
| Paludibacter_OTU#150               | 0 | 0 | 1 | 0 | 0 | 0 | 0 | 0 | 0 | 0 | 0 | 0 | 0 | 0 | 0 | 0 | 0 | 0 | 0 | 0 |
| Limibacter_OTU#151                 | 0 | 0 | 1 | 0 | 0 | 0 | 0 | 0 | 0 | 0 | 0 | 0 | 0 | 0 | 0 | 0 | 0 | 0 | 0 | 0 |
| Unclassified Bacteroidetes_OTU#152 | 0 | 0 | 2 | 0 | 0 | 0 | 0 | 0 | 0 | 0 | 0 | 0 | 0 | 0 | 0 | 0 | 0 | 0 | 0 | 0 |
| Parasutterella_OTU#153             | 0 | 0 | 1 | 0 | 0 | 0 | 0 | 0 | 0 | 0 | 0 | 0 | 0 | 0 | 0 | 0 | 0 | 0 | 0 | 0 |
| Lactovum_OTU#154                   | 0 | 0 | 3 | 0 | 0 | 0 | 0 | 0 | 0 | 0 | 0 | 0 | 0 | 0 | 0 | 0 | 0 | 0 | 0 | 0 |
| Paludibacter_OTU#155               | 0 | 0 | 1 | 0 | 0 | 0 | 0 | 0 | 0 | 0 | 0 | 0 | 0 | 0 | 0 | 0 | 0 | 0 | 0 | 0 |

Supplementary Table 1

|                                            |   |   |   |   |   |   |   |   |   |   |   |   |   |   |   |   |   |   |   |   |
|--------------------------------------------|---|---|---|---|---|---|---|---|---|---|---|---|---|---|---|---|---|---|---|---|
| Limibacter_OTU#156                         | 0 | 0 | 1 | 0 | 0 | 0 | 0 | 0 | 0 | 0 | 0 | 0 | 0 | 0 | 0 | 0 | 0 | 0 | 0 | 0 |
| Rikenella_OTU#157                          | 0 | 0 | 1 | 0 | 0 | 0 | 0 | 0 | 0 | 0 | 0 | 0 | 0 | 0 | 0 | 0 | 0 | 0 | 0 | 0 |
| Aquiflexum_OTU#158                         | 1 | 0 | 2 | 0 | 0 | 0 | 0 | 0 | 0 | 0 | 0 | 0 | 0 | 0 | 0 | 0 | 0 | 0 | 0 | 0 |
| Anaerophaga_OTU#159                        | 0 | 0 | 1 | 0 | 0 | 0 | 0 | 0 | 0 | 0 | 0 | 0 | 0 | 0 | 0 | 0 | 0 | 0 | 0 | 0 |
| Paludibacter_OTU#160                       | 0 | 0 | 1 | 0 | 0 | 0 | 0 | 0 | 0 | 0 | 0 | 0 | 0 | 0 | 0 | 0 | 0 | 0 | 0 | 0 |
| Allobaculum_OTU#161                        | 0 | 0 | 1 | 0 | 0 | 0 | 0 | 0 | 0 | 0 | 0 | 0 | 0 | 0 | 0 | 0 | 0 | 0 | 0 | 0 |
| Rikenella_OTU#162                          | 0 | 0 | 2 | 0 | 0 | 0 | 0 | 0 | 0 | 0 | 0 | 0 | 0 | 0 | 0 | 0 | 0 | 0 | 0 | 0 |
| Limibacter_OTU#163                         | 0 | 0 | 1 | 0 | 0 | 0 | 0 | 0 | 0 | 0 | 0 | 0 | 0 | 0 | 0 | 0 | 0 | 0 | 0 | 0 |
| Paludibacter_OTU#164                       | 0 | 0 | 1 | 0 | 0 | 0 | 0 | 0 | 0 | 0 | 0 | 0 | 0 | 0 | 0 | 0 | 0 | 0 | 0 | 0 |
| Limibacter_OTU#165                         | 0 | 0 | 1 | 0 | 0 | 0 | 0 | 0 | 0 | 0 | 0 | 0 | 0 | 0 | 0 | 0 | 0 | 0 | 0 | 0 |
| Allobaculum_OTU#166                        | 0 | 0 | 1 | 0 | 0 | 0 | 0 | 0 | 0 | 0 | 0 | 0 | 0 | 0 | 0 | 0 | 0 | 0 | 0 | 0 |
| Allobaculum_OTU#167                        | 0 | 0 | 1 | 0 | 0 | 0 | 0 | 0 | 0 | 0 | 0 | 0 | 0 | 0 | 0 | 0 | 0 | 0 | 0 | 0 |
| Limibacter_OTU#168                         | 0 | 0 | 2 | 0 | 0 | 0 | 0 | 0 | 0 | 0 | 0 | 0 | 0 | 0 | 0 | 0 | 0 | 0 | 0 | 0 |
| Limibacter_OTU#169                         | 0 | 0 | 1 | 0 | 0 | 0 | 0 | 0 | 0 | 0 | 0 | 0 | 0 | 0 | 0 | 0 | 0 | 0 | 0 | 0 |
| Parasutterella_OTU#170                     | 0 | 0 | 1 | 0 | 0 | 0 | 0 | 0 | 0 | 0 | 0 | 0 | 0 | 0 | 0 | 0 | 0 | 0 | 0 | 0 |
| Unclassified<br>Porphyromonadaceae_OTU#171 | 0 | 1 | 1 | 0 | 0 | 0 | 0 | 0 | 0 | 0 | 0 | 0 | 0 | 0 | 0 | 0 | 0 | 0 | 0 | 0 |
| Diaphorobacter_OTU#172                     | 0 | 0 | 2 | 0 | 0 | 0 | 0 | 0 | 0 | 0 | 0 | 0 | 0 | 0 | 0 | 0 | 0 | 0 | 0 | 0 |
| Allobaculum_OTU#173                        | 0 | 0 | 1 | 0 | 0 | 0 | 0 | 0 | 0 | 0 | 0 | 0 | 0 | 0 | 0 | 0 | 0 | 0 | 0 | 0 |
| Anaerophaga_OTU#174                        | 0 | 0 | 1 | 0 | 0 | 0 | 0 | 0 | 0 | 0 | 0 | 0 | 0 | 0 | 0 | 0 | 0 | 0 | 0 | 0 |
| Paraprevotella_OTU#175                     | 0 | 0 | 1 | 0 | 0 | 0 | 0 | 0 | 0 | 0 | 0 | 0 | 0 | 0 | 0 | 0 | 0 | 0 | 0 | 0 |
| Allobaculum_OTU#176                        | 0 | 0 | 1 | 0 | 0 | 0 | 0 | 0 | 0 | 0 | 0 | 0 | 0 | 0 | 0 | 0 | 0 | 0 | 0 | 0 |
| Paludibacter_OTU#177                       | 0 | 0 | 1 | 0 | 0 | 0 | 0 | 0 | 0 | 0 | 0 | 0 | 0 | 0 | 0 | 0 | 0 | 0 | 0 | 0 |
| Limibacter_OTU#178                         | 0 | 0 | 1 | 0 | 0 | 0 | 0 | 0 | 0 | 0 | 0 | 0 | 0 | 0 | 0 | 0 | 0 | 0 | 0 | 0 |
| Barnesiella_OTU#179                        | 0 | 0 | 0 | 1 | 0 | 0 | 0 | 0 | 0 | 0 | 0 | 0 | 0 | 0 | 0 | 0 | 0 | 0 | 0 | 0 |
| Paludibacter_OTU#180                       | 0 | 0 | 0 | 1 | 0 | 0 | 0 | 0 | 0 | 0 | 0 | 0 | 0 | 0 | 0 | 0 | 0 | 0 | 0 | 0 |
| Barnesiella_OTU#181                        | 0 | 0 | 0 | 1 | 0 | 0 | 0 | 0 | 0 | 0 | 0 | 0 | 0 | 0 | 0 | 0 | 0 | 0 | 0 | 0 |
| Paludibacter_OTU#182                       | 0 | 0 | 0 | 1 | 0 | 0 | 0 | 0 | 0 | 0 | 0 | 0 | 0 | 0 | 0 | 0 | 0 | 0 | 0 | 0 |
| Paludibacter_OTU#183                       | 0 | 0 | 0 | 1 | 0 | 0 | 0 | 0 | 0 | 0 | 0 | 0 | 0 | 0 | 0 | 0 | 0 | 0 | 0 | 0 |
| Paludibacter_OTU#184                       | 0 | 0 | 0 | 1 | 0 | 0 | 0 | 0 | 0 | 0 | 0 | 0 | 0 | 0 | 0 | 0 | 0 | 0 | 0 | 0 |
| Paludibacter_OTU#185                       | 0 | 1 | 1 | 1 | 0 | 0 | 0 | 0 | 0 | 0 | 0 | 0 | 0 | 0 | 0 | 0 | 0 | 0 | 0 | 0 |
| Belliella_OTU#186                          | 0 | 0 | 0 | 1 | 0 | 0 | 0 | 0 | 0 | 0 | 0 | 0 | 0 | 0 | 0 | 0 | 0 | 0 | 0 | 0 |
| Unclassified Bacteroidetes_OTU#187         | 0 | 1 | 0 | 1 | 0 | 0 | 0 | 0 | 0 | 0 | 0 | 0 | 0 | 0 | 0 | 0 | 0 | 0 | 0 | 0 |
| Unclassified TM7_OTU#188                   | 0 | 0 | 0 | 1 | 0 | 0 | 0 | 0 | 0 | 0 | 0 | 0 | 0 | 0 | 0 | 0 | 0 | 0 | 0 | 0 |

Supplementary Table 1

|                                    |   |   |   |   |   |   |   |   |   |   |   |   |   |   |   |   |   |   |   |   |
|------------------------------------|---|---|---|---|---|---|---|---|---|---|---|---|---|---|---|---|---|---|---|---|
| Paludibacter_OTU#189               | 0 | 0 | 0 | 1 | 0 | 0 | 0 | 0 | 0 | 0 | 0 | 0 | 0 | 0 | 0 | 0 | 0 | 0 | 0 | 0 |
| Allobaculum_OTU#190                | 0 | 0 | 0 | 1 | 0 | 0 | 0 | 0 | 0 | 0 | 0 | 0 | 0 | 0 | 0 | 0 | 0 | 0 | 0 | 0 |
| Paludibacter_OTU#191               | 0 | 3 | 1 | 1 | 0 | 0 | 0 | 0 | 0 | 0 | 0 | 0 | 0 | 0 | 0 | 0 | 0 | 0 | 0 | 0 |
| Paludibacter_OTU#192               | 0 | 0 | 0 | 1 | 0 | 0 | 0 | 0 | 0 | 0 | 0 | 0 | 0 | 0 | 0 | 0 | 0 | 0 | 0 | 0 |
| Barnesiella_OTU#193                | 0 | 0 | 0 | 1 | 0 | 0 | 0 | 0 | 0 | 0 | 0 | 0 | 0 | 0 | 0 | 0 | 0 | 0 | 0 | 0 |
| Allobaculum_OTU#194                | 1 | 1 | 0 | 3 | 0 | 0 | 0 | 0 | 0 | 0 | 0 | 0 | 0 | 0 | 0 | 0 | 0 | 0 | 0 | 0 |
| Anaerophaga_OTU#195                | 0 | 0 | 0 | 1 | 0 | 0 | 0 | 0 | 0 | 0 | 0 | 0 | 0 | 0 | 0 | 0 | 0 | 0 | 0 | 0 |
| Paludibacter_OTU#196               | 0 | 0 | 0 | 1 | 0 | 0 | 0 | 0 | 0 | 0 | 0 | 0 | 0 | 0 | 0 | 0 | 0 | 0 | 0 | 0 |
| Barnesiella_OTU#197                | 0 | 0 | 0 | 1 | 0 | 0 | 0 | 0 | 0 | 0 | 0 | 0 | 0 | 0 | 0 | 0 | 0 | 0 | 0 | 0 |
| Paludibacter_OTU#198               | 0 | 0 | 0 | 1 | 0 | 0 | 0 | 0 | 0 | 0 | 0 | 0 | 0 | 0 | 0 | 0 | 0 | 0 | 0 | 0 |
| Paludibacter_OTU#199               | 1 | 0 | 4 | 1 | 1 | 0 | 0 | 0 | 0 | 0 | 0 | 0 | 0 | 0 | 0 | 0 | 0 | 0 | 0 | 0 |
| Paludibacter_OTU#200               | 0 | 0 | 0 | 1 | 0 | 0 | 0 | 0 | 0 | 0 | 0 | 0 | 0 | 0 | 0 | 0 | 0 | 0 | 0 | 0 |
| Allobaculum_OTU#201                | 0 | 0 | 0 | 1 | 0 | 0 | 0 | 0 | 0 | 0 | 0 | 0 | 0 | 0 | 0 | 0 | 0 | 0 | 0 | 0 |
| Rikenella_OTU#202                  | 0 | 0 | 0 | 1 | 0 | 0 | 0 | 0 | 0 | 0 | 0 | 0 | 0 | 0 | 0 | 0 | 0 | 0 | 0 | 0 |
| Limibacter_OTU#203                 | 0 | 0 | 0 | 1 | 0 | 0 | 0 | 0 | 0 | 0 | 0 | 0 | 0 | 0 | 0 | 0 | 0 | 0 | 0 | 0 |
| Barnesiella_OTU#204                | 0 | 0 | 0 | 1 | 0 | 0 | 0 | 0 | 0 | 0 | 0 | 0 | 0 | 0 | 0 | 0 | 0 | 0 | 0 | 0 |
| Limibacter_OTU#205                 | 0 | 0 | 0 | 1 | 0 | 0 | 0 | 0 | 0 | 0 | 0 | 0 | 0 | 0 | 0 | 0 | 0 | 0 | 0 | 0 |
| Allobaculum_OTU#206                | 0 | 0 | 0 | 1 | 0 | 0 | 0 | 0 | 0 | 0 | 0 | 0 | 0 | 0 | 0 | 0 | 0 | 0 | 0 | 0 |
| Limibacter_OTU#207                 | 0 | 0 | 0 | 1 | 0 | 0 | 0 | 0 | 0 | 0 | 0 | 0 | 0 | 0 | 0 | 0 | 0 | 0 | 0 | 0 |
| Barnesiella_OTU#208                | 1 | 3 | 0 | 1 | 0 | 0 | 0 | 0 | 0 | 0 | 0 | 0 | 0 | 0 | 0 | 0 | 0 | 0 | 0 | 0 |
| Barnesiella_OTU#209                | 0 | 0 | 0 | 1 | 0 | 0 | 0 | 0 | 0 | 0 | 0 | 0 | 0 | 0 | 0 | 0 | 0 | 0 | 0 | 0 |
| Limibacter_OTU#210                 | 0 | 0 | 0 | 1 | 0 | 0 | 0 | 0 | 0 | 0 | 0 | 0 | 0 | 0 | 0 | 0 | 0 | 0 | 0 | 0 |
| Limibacter_OTU#211                 | 0 | 1 | 0 | 1 | 0 | 0 | 0 | 0 | 0 | 0 | 0 | 0 | 0 | 0 | 0 | 0 | 0 | 0 | 0 | 0 |
| Paludibacter_OTU#212               | 0 | 0 | 0 | 1 | 0 | 0 | 0 | 0 | 0 | 0 | 0 | 0 | 0 | 0 | 0 | 0 | 0 | 0 | 0 | 0 |
| Limibacter_OTU#213                 | 1 | 1 | 1 | 1 | 0 | 0 | 0 | 0 | 0 | 0 | 0 | 0 | 0 | 0 | 0 | 0 | 0 | 0 | 0 | 0 |
| Aquiflexum_OTU#214                 | 0 | 0 | 0 | 1 | 0 | 0 | 0 | 0 | 0 | 0 | 0 | 0 | 0 | 0 | 0 | 0 | 0 | 0 | 0 | 0 |
| Paludibacter_OTU#215               | 0 | 1 | 0 | 1 | 0 | 0 | 0 | 0 | 0 | 0 | 0 | 0 | 0 | 0 | 0 | 0 | 0 | 0 | 0 | 0 |
| Limibacter_OTU#216                 | 3 | 0 | 2 | 2 | 2 | 0 | 0 | 0 | 0 | 0 | 0 | 0 | 0 | 0 | 0 | 0 | 0 | 0 | 0 | 0 |
| Allobaculum_OTU#217                | 0 | 0 | 0 | 1 | 0 | 0 | 0 | 0 | 0 | 0 | 0 | 0 | 0 | 0 | 0 | 0 | 0 | 0 | 0 | 0 |
| Limibacter_OTU#218                 | 0 | 0 | 0 | 1 | 0 | 0 | 0 | 0 | 0 | 0 | 0 | 0 | 0 | 0 | 0 | 0 | 0 | 0 | 0 | 0 |
| Barnesiella_OTU#219                | 0 | 1 | 0 | 2 | 0 | 0 | 0 | 0 | 0 | 0 | 0 | 0 | 0 | 0 | 0 | 0 | 0 | 0 | 0 | 0 |
| Rikenella_OTU#220                  | 0 | 0 | 0 | 1 | 0 | 0 | 0 | 0 | 0 | 0 | 0 | 0 | 0 | 0 | 0 | 0 | 0 | 0 | 0 | 0 |
| Unclassified Bacteroidetes_OTU#221 | 0 | 0 | 1 | 1 | 0 | 0 | 0 | 0 | 0 | 0 | 0 | 0 | 0 | 0 | 0 | 0 | 0 | 0 | 0 | 0 |

Supplementary Table 1

|                                    |   |   |   |   |   |   |   |   |   |   |   |   |   |   |   |   |   |   |   |   |
|------------------------------------|---|---|---|---|---|---|---|---|---|---|---|---|---|---|---|---|---|---|---|---|
| Rikenella_OTU#222                  | 0 | 0 | 0 | 1 | 0 | 0 | 0 | 0 | 0 | 0 | 0 | 0 | 0 | 0 | 0 | 0 | 0 | 0 | 0 | 0 |
| Paludibacter_OTU#223               | 0 | 0 | 0 | 1 | 0 | 0 | 0 | 0 | 0 | 0 | 0 | 0 | 0 | 0 | 0 | 0 | 0 | 0 | 0 | 0 |
| Paludibacter_OTU#224               | 0 | 0 | 0 | 1 | 0 | 0 | 0 | 0 | 0 | 0 | 0 | 0 | 0 | 0 | 0 | 0 | 0 | 0 | 0 | 0 |
| Parasutterella_OTU#225             | 0 | 0 | 0 | 1 | 0 | 0 | 0 | 0 | 0 | 0 | 0 | 0 | 0 | 0 | 0 | 0 | 0 | 0 | 0 | 0 |
| Barnesiella_OTU#226                | 0 | 0 | 0 | 1 | 0 | 0 | 0 | 0 | 0 | 0 | 0 | 0 | 0 | 0 | 0 | 0 | 0 | 0 | 0 | 0 |
| Tannerella_OTU#227                 | 0 | 0 | 0 | 1 | 0 | 0 | 0 | 0 | 0 | 0 | 0 | 0 | 0 | 0 | 0 | 0 | 0 | 0 | 0 | 0 |
| Unclassified Bacteroidales_OTU#228 | 0 | 0 | 0 | 2 | 0 | 0 | 0 | 0 | 0 | 0 | 0 | 0 | 0 | 0 | 0 | 0 | 0 | 0 | 0 | 0 |
| Limibacter_OTU#229                 | 0 | 0 | 0 | 1 | 0 | 0 | 0 | 0 | 0 | 0 | 0 | 0 | 0 | 0 | 0 | 0 | 0 | 0 | 0 | 0 |
| Paludibacter_OTU#230               | 0 | 2 | 0 | 1 | 0 | 0 | 0 | 0 | 0 | 0 | 0 | 0 | 0 | 0 | 0 | 0 | 0 | 0 | 0 | 0 |
| Limibacter_OTU#231                 | 0 | 0 | 0 | 1 | 0 | 0 | 0 | 0 | 0 | 0 | 0 | 0 | 0 | 0 | 0 | 0 | 0 | 0 | 0 | 0 |
| Limibacter_OTU#232                 | 0 | 0 | 0 | 1 | 0 | 0 | 0 | 0 | 0 | 0 | 0 | 0 | 0 | 0 | 0 | 0 | 0 | 0 | 0 | 0 |
| Paludibacter_OTU#233               | 0 | 0 | 0 | 1 | 0 | 0 | 0 | 0 | 0 | 0 | 0 | 0 | 0 | 0 | 0 | 0 | 0 | 0 | 0 | 0 |
| Barnesiella_OTU#234                | 0 | 0 | 0 | 1 | 0 | 0 | 0 | 0 | 0 | 0 | 0 | 0 | 0 | 0 | 0 | 0 | 0 | 0 | 0 | 0 |
| Limibacter_OTU#235                 | 0 | 0 | 0 | 0 | 1 | 0 | 0 | 0 | 0 | 0 | 0 | 0 | 0 | 0 | 0 | 0 | 0 | 0 | 0 | 0 |
| Barnesiella_OTU#236                | 0 | 0 | 0 | 1 | 1 | 0 | 0 | 0 | 0 | 0 | 0 | 0 | 0 | 0 | 0 | 0 | 0 | 0 | 0 | 0 |
| Barnesiella_OTU#237                | 0 | 0 | 0 | 0 | 1 | 0 | 0 | 0 | 0 | 0 | 0 | 0 | 0 | 0 | 0 | 0 | 0 | 0 | 0 | 0 |
| Staphylococcus_OTU#238             | 0 | 0 | 0 | 0 | 1 | 0 | 0 | 0 | 0 | 0 | 0 | 0 | 0 | 0 | 0 | 0 | 0 | 0 | 0 | 0 |
| Paludibacter_OTU#239               | 0 | 0 | 0 | 0 | 1 | 0 | 0 | 0 | 0 | 0 | 0 | 0 | 0 | 0 | 0 | 0 | 0 | 0 | 0 | 0 |
| Limibacter_OTU#240                 | 0 | 1 | 0 | 0 | 1 | 0 | 0 | 0 | 0 | 0 | 0 | 0 | 0 | 0 | 0 | 0 | 0 | 0 | 0 | 0 |
| Tannerella_OTU#241                 | 0 | 0 | 0 | 0 | 1 | 0 | 0 | 0 | 0 | 0 | 0 | 0 | 0 | 0 | 0 | 0 | 0 | 0 | 0 | 0 |
| Parasutterella_OTU#242             | 0 | 0 | 0 | 0 | 1 | 0 | 0 | 0 | 0 | 0 | 0 | 0 | 0 | 0 | 0 | 0 | 0 | 0 | 0 | 0 |
| Tannerella_OTU#243                 | 0 | 0 | 0 | 0 | 1 | 0 | 0 | 0 | 0 | 2 | 0 | 0 | 0 | 0 | 0 | 0 | 0 | 0 | 0 | 0 |
| Unclassified Bacteroidales_OTU#244 | 0 | 0 | 0 | 0 | 2 | 0 | 0 | 0 | 0 | 0 | 0 | 0 | 0 | 0 | 0 | 0 | 0 | 0 | 0 | 0 |
| Paludibacter_OTU#245               | 0 | 0 | 0 | 0 | 1 | 0 | 0 | 0 | 0 | 0 | 0 | 0 | 0 | 0 | 0 | 0 | 0 | 0 | 0 | 0 |
| Limibacter_OTU#246                 | 1 | 4 | 0 | 0 | 1 | 0 | 0 | 0 | 0 | 0 | 0 | 0 | 0 | 0 | 0 | 0 | 0 | 0 | 0 | 0 |
| Hallella_OTU#247                   | 0 | 0 | 0 | 0 | 1 | 0 | 0 | 0 | 0 | 0 | 0 | 0 | 0 | 0 | 0 | 0 | 0 | 0 | 0 | 0 |
| Barnesiella_OTU#248                | 0 | 0 | 0 | 0 | 1 | 0 | 0 | 0 | 0 | 0 | 0 | 0 | 0 | 0 | 0 | 0 | 0 | 0 | 0 | 0 |
| Limibacter_OTU#249                 | 0 | 0 | 0 | 0 | 1 | 0 | 0 | 0 | 0 | 0 | 0 | 0 | 0 | 0 | 0 | 0 | 0 | 0 | 0 | 0 |
| Paludibacter_OTU#250               | 0 | 0 | 0 | 0 | 1 | 0 | 0 | 0 | 0 | 0 | 0 | 0 | 0 | 0 | 0 | 0 | 0 | 0 | 0 | 0 |
| Paludibacter_OTU#251               | 0 | 0 | 0 | 0 | 1 | 0 | 0 | 0 | 0 | 0 | 0 | 0 | 0 | 0 | 0 | 0 | 0 | 0 | 0 | 0 |
| Paludibacter_OTU#252               | 0 | 0 | 0 | 0 | 2 | 0 | 0 | 0 | 0 | 0 | 0 | 0 | 0 | 0 | 0 | 0 | 0 | 0 | 0 | 0 |
| Barnesiella_OTU#253                | 0 | 0 | 0 | 0 | 1 | 0 | 0 | 0 | 0 | 0 | 0 | 0 | 0 | 0 | 0 | 0 | 0 | 0 | 0 | 0 |
| Paludibacter_OTU#254               | 0 | 0 | 0 | 0 | 1 | 0 | 0 | 0 | 0 | 0 | 0 | 0 | 0 | 0 | 0 | 0 | 0 | 0 | 0 | 0 |

Supplementary Table 1



|                                            |   |   |         |    |    |   |   |   |   |   |   |   |   |   |   |   |   |   |   |   |
|--------------------------------------------|---|---|---------|----|----|---|---|---|---|---|---|---|---|---|---|---|---|---|---|---|
| Anaerophaga_OTU#255                        | 0 | 0 | 0       | 0  | 1  | 0 | 0 | 0 | 0 | 0 | 0 | 0 | 0 | 0 | 0 | 0 | 0 | 0 | 0 | 0 |
| Allobaculum_OTU#256                        | 0 | 0 | 0       | 0  | 1  | 0 | 0 | 0 | 0 | 0 | 0 | 0 | 0 | 0 | 0 | 0 | 0 | 0 | 0 | 0 |
| Barnesiella_OTU#257                        | 0 | 0 | 1       | 0  | 1  | 0 | 0 | 0 | 0 | 0 | 0 | 0 | 0 | 0 | 0 | 0 | 0 | 0 | 0 | 0 |
| Tannerella_OTU#258                         | 0 | 0 | 0       | 0  | 1  | 0 | 0 | 0 | 0 | 0 | 0 | 0 | 0 | 0 | 0 | 0 | 0 | 0 | 0 | 0 |
| Rikenella_OTU#259                          | 0 | 0 | 0       | 0  | 1  | 0 | 0 | 0 | 0 | 0 | 0 | 0 | 0 | 0 | 0 | 0 | 0 | 0 | 0 | 0 |
| Paludibacter_OTU#260                       | 0 | 0 | 0       | 0  | 1  | 0 | 0 | 0 | 0 | 0 | 0 | 0 | 0 | 0 | 0 | 0 | 0 | 0 | 0 | 0 |
| Paludibacter_OTU#261                       | 0 | 0 | 0       | 0  | 1  | 0 | 0 | 0 | 0 | 0 | 0 | 0 | 0 | 0 | 0 | 0 | 0 | 0 | 0 | 0 |
| Barnesiella_OTU#262                        | 0 | 0 | 0       | 0  | 1  | 0 | 0 | 0 | 0 | 0 | 0 | 0 | 0 | 0 | 0 | 0 | 0 | 0 | 0 | 0 |
| Barnesiella_OTU#263                        | 0 | 0 | 0       | 0  | 1  | 0 | 0 | 0 | 0 | 0 | 0 | 0 | 0 | 0 | 0 | 0 | 0 | 0 | 0 | 0 |
| Limibacter_OTU#264                         | 0 | 0 | 2       | 1  | 1  | 0 | 0 | 0 | 0 | 0 | 0 | 0 | 0 | 0 | 0 | 0 | 0 | 0 | 0 | 0 |
| Barnesiella_OTU#265                        | 0 | 0 | 0       | 0  | 1  | 0 | 0 | 0 | 0 | 0 | 0 | 0 | 0 | 0 | 0 | 0 | 0 | 0 | 0 | 0 |
| Ureaplasma_OTU#266                         | 0 | 0 | 0       | 0  | 1  | 0 | 0 | 0 | 0 | 0 | 0 | 0 | 0 | 0 | 0 | 0 | 0 | 0 | 0 | 0 |
| Hallella_OTU#267                           | 0 | 0 | 0       | 0  | 1  | 0 | 0 | 0 | 0 | 0 | 0 | 0 | 0 | 0 | 0 | 0 | 0 | 0 | 0 | 0 |
| Unclassified<br>Porphyromonadaceae_OTU#268 | 0 | 0 | 0       | 0  | 2  | 0 | 0 | 0 | 0 | 0 | 0 | 0 | 0 | 0 | 0 | 0 | 0 | 0 | 0 | 0 |
| Paludibacter_OTU#269                       | 0 | 0 | 0       | 0  | 1  | 0 | 0 | 0 | 0 | 0 | 0 | 0 | 0 | 0 | 0 | 0 | 0 | 0 | 0 | 0 |
| Allobaculum_OTU#270                        | 0 | 0 | 0       | 0  | 1  | 0 | 0 | 0 | 0 | 0 | 0 | 0 | 0 | 0 | 0 | 0 | 0 | 0 | 0 | 0 |
| Barnesiella_OTU#271                        | 0 | 0 | 0       | 0  | 1  | 0 | 0 | 0 | 0 | 0 | 0 | 0 | 0 | 0 | 0 | 0 | 0 | 0 | 0 | 0 |
| Rikenella_OTU#272                          | 0 | 0 | 0       | 0  | 1  | 0 | 0 | 0 | 0 | 0 | 0 | 0 | 0 | 0 | 0 | 0 | 0 | 0 | 0 | 0 |
| Limibacter_OTU#273                         | 3 | 0 | 17<br>9 | 38 | 25 | 0 | 0 | 0 | 0 | 0 | 0 | 0 | 0 | 0 | 0 | 0 | 0 | 0 | 0 | 0 |
| Tannerella_OTU#274                         | 0 | 0 | 0       | 0  | 1  | 0 | 0 | 1 | 0 | 0 | 0 | 0 | 0 | 0 | 0 | 0 | 0 | 0 | 0 | 0 |
| Parasutterella_OTU#275                     | 1 | 1 | 0       | 1  | 1  | 0 | 0 | 0 | 0 | 0 | 0 | 0 | 0 | 0 | 0 | 0 | 0 | 0 | 0 | 0 |
| Unclassified Bacteroidetes_OTU#276         | 1 | 1 | 0       | 0  | 2  | 0 | 0 | 0 | 0 | 0 | 0 | 0 | 0 | 0 | 0 | 0 | 0 | 0 | 0 | 0 |
| Tannerella_OTU#277                         | 0 | 0 | 0       | 0  | 1  | 0 | 0 | 0 | 0 | 0 | 0 | 0 | 0 | 0 | 0 | 0 | 0 | 0 | 0 | 0 |
| Xylanibacter_OTU#278                       | 0 | 0 | 0       | 0  | 1  | 0 | 0 | 0 | 0 | 0 | 0 | 0 | 0 | 0 | 0 | 0 | 0 | 0 | 0 | 0 |
| Limibacter_OTU#279                         | 0 | 0 | 0       | 1  | 2  | 0 | 0 | 0 | 0 | 0 | 0 | 0 | 0 | 0 | 0 | 0 | 0 | 0 | 0 | 0 |
| Limibacter_OTU#280                         | 0 | 1 | 0       | 0  | 1  | 0 | 0 | 0 | 0 | 0 | 0 | 0 | 0 | 0 | 0 | 0 | 0 | 0 | 0 | 0 |
| Limibacter_OTU#281                         | 0 | 0 | 0       | 2  | 2  | 0 | 0 | 0 | 0 | 0 | 0 | 0 | 0 | 0 | 0 | 0 | 0 | 0 | 0 | 0 |
| Barnesiella_OTU#282                        | 0 | 0 | 0       | 0  | 1  | 0 | 0 | 0 | 0 | 0 | 0 | 0 | 0 | 0 | 0 | 0 | 0 | 0 | 0 | 0 |
| Barnesiella_OTU#283                        | 0 | 1 | 0       | 0  | 1  | 0 | 0 | 0 | 0 | 0 | 0 | 0 | 0 | 0 | 0 | 0 | 0 | 0 | 0 | 0 |
| Allobaculum_OTU#284                        | 0 | 2 | 0       | 0  | 1  | 0 | 0 | 0 | 0 | 0 | 0 | 0 | 0 | 0 | 0 | 0 | 0 | 0 | 0 | 0 |
| Rikenella_OTU#285                          | 0 | 0 | 0       | 0  | 1  | 0 | 0 | 0 | 0 | 0 | 0 | 0 | 0 | 0 | 0 | 0 | 0 | 0 | 0 | 0 |
| Limibacter_OTU#286                         | 0 | 0 | 0       | 0  | 1  | 0 | 0 | 0 | 0 | 0 | 0 | 0 | 0 | 0 | 0 | 0 | 0 | 0 | 0 | 0 |

Supplementary Table 1

|                        |    |    |    |    |    |   |   |   |   |   |   |   |   |   |   |   |   |   |   |   |
|------------------------|----|----|----|----|----|---|---|---|---|---|---|---|---|---|---|---|---|---|---|---|
| Paludibacter_OTU#287   | 0  | 0  | 0  | 0  | 1  | 0 | 0 | 0 | 0 | 0 | 0 | 0 | 0 | 0 | 0 | 0 | 0 | 0 | 0 | 0 |
| Allobaculum_OTU#288    | 32 | 12 | 46 | 44 | 21 | 0 | 1 | 1 | 0 | 0 | 0 | 0 | 0 | 0 | 0 | 0 | 0 | 0 | 0 | 0 |
| Paludibacter_OTU#289   | 4  | 3  | 0  | 9  | 1  | 0 | 0 | 0 | 0 | 0 | 0 | 0 | 0 | 0 | 0 | 0 | 0 | 0 | 0 | 0 |
| Paludibacter_OTU#290   | 0  | 0  | 0  | 1  | 1  | 0 | 0 | 0 | 0 | 0 | 0 | 0 | 0 | 0 | 0 | 0 | 0 | 0 | 0 | 0 |
| Paludibacter_OTU#290   | 2  | 3  | 0  | 0  | 1  | 0 | 0 | 0 | 0 | 0 | 0 | 0 | 0 | 0 | 0 | 0 | 0 | 0 | 0 | 0 |
| Limibacter_OTU#291     | 1  | 0  | 0  | 1  | 1  | 0 | 0 | 0 | 0 | 0 | 0 | 0 | 0 | 0 | 0 | 0 | 0 | 0 | 0 | 0 |
| Limibacter_OTU#292     | 0  | 0  | 0  | 0  | 1  | 0 | 0 | 0 | 0 | 0 | 0 | 0 | 0 | 0 | 0 | 0 | 0 | 0 | 0 | 0 |
| Limibacter_OTU#292     | 0  | 0  | 0  | 0  | 1  | 0 | 0 | 0 | 0 | 0 | 0 | 0 | 0 | 0 | 0 | 0 | 0 | 0 | 0 | 0 |
| Barnesiella_OTU#293    | 0  | 0  | 0  | 1  | 1  | 0 | 0 | 0 | 0 | 0 | 0 | 0 | 0 | 0 | 0 | 0 | 0 | 0 | 0 | 0 |
| Barnesiella_OTU#293    | 0  | 0  | 0  | 1  | 1  | 0 | 0 | 0 | 0 | 0 | 0 | 0 | 0 | 0 | 0 | 0 | 0 | 0 | 0 | 0 |
| Paludibacter_OTU#294   | 2  | 1  | 0  | 2  | 3  | 0 | 0 | 0 | 0 | 0 | 0 | 0 | 0 | 0 | 0 | 0 | 0 | 0 | 0 | 0 |
| Paludibacter_OTU#295   | 0  | 0  | 0  | 0  | 1  | 0 | 0 | 0 | 0 | 0 | 0 | 0 | 0 | 0 | 0 | 0 | 0 | 0 | 0 | 0 |
| Paludibacter_OTU#295   | 0  | 0  | 0  | 0  | 1  | 0 | 0 | 0 | 0 | 0 | 0 | 0 | 0 | 0 | 0 | 0 | 0 | 0 | 0 | 0 |
| Lawsonia_OTU#296       | 0  | 0  | 0  | 0  | 0  | 0 | 1 | 0 | 0 | 0 | 0 | 0 | 0 | 0 | 0 | 0 | 0 | 0 | 0 | 0 |
| Lawsonia_OTU#296       | 0  | 0  | 0  | 0  | 0  | 0 | 1 | 0 | 0 | 0 | 0 | 0 | 0 | 0 | 0 | 0 | 0 | 0 | 0 | 0 |
| Paludibacter_OTU#297   | 0  | 0  | 0  | 0  | 0  | 0 | 1 | 0 | 0 | 0 | 0 | 0 | 0 | 0 | 0 | 0 | 0 | 0 | 0 | 0 |
| Paludibacter_OTU#297   | 0  | 0  | 0  | 0  | 0  | 0 | 1 | 0 | 0 | 0 | 0 | 0 | 0 | 0 | 0 | 0 | 0 | 0 | 0 | 0 |
| Adlercreutzia_OTU#298  | 0  | 0  | 0  | 0  | 0  | 0 | 1 | 0 | 0 | 0 | 0 | 0 | 0 | 0 | 0 | 0 | 0 | 0 | 0 | 0 |
| Adlercreutzia_OTU#298  | 0  | 0  | 0  | 0  | 0  | 0 | 1 | 0 | 0 | 0 | 0 | 0 | 0 | 0 | 0 | 0 | 0 | 0 | 0 | 0 |
| Limibacter_OTU#299     | 0  | 0  | 0  | 0  | 0  | 0 | 1 | 0 | 0 | 0 | 0 | 0 | 0 | 0 | 0 | 0 | 0 | 0 | 0 | 0 |
| Limibacter_OTU#299     | 0  | 0  | 0  | 0  | 0  | 0 | 1 | 0 | 0 | 0 | 0 | 0 | 0 | 0 | 0 | 0 | 0 | 0 | 0 | 0 |
| Blautia_OTU#300        | 0  | 0  | 0  | 0  | 0  | 0 | 1 | 0 | 0 | 0 | 0 | 0 | 0 | 0 | 0 | 0 | 0 | 0 | 0 | 0 |
| Blautia_OTU#300        | 0  | 0  | 0  | 0  | 0  | 0 | 1 | 0 | 0 | 0 | 0 | 0 | 0 | 0 | 0 | 0 | 0 | 0 | 0 | 0 |
| Paludibacter_OTU#301   | 0  | 0  | 0  | 0  | 0  | 0 | 1 | 0 | 0 | 0 | 0 | 0 | 0 | 0 | 0 | 0 | 0 | 0 | 0 | 0 |
| Paludibacter_OTU#301   | 0  | 0  | 0  | 0  | 0  | 0 | 1 | 0 | 0 | 0 | 0 | 0 | 0 | 0 | 0 | 0 | 0 | 0 | 0 | 0 |
| Limibacter_OTU#302     | 0  | 0  | 0  | 0  | 0  | 0 | 1 | 0 | 0 | 0 | 0 | 0 | 0 | 0 | 0 | 0 | 0 | 0 | 0 | 0 |
| Limibacter_OTU#302     | 0  | 0  | 0  | 0  | 0  | 0 | 1 | 0 | 0 | 0 | 0 | 0 | 0 | 0 | 0 | 0 | 0 | 0 | 0 | 0 |
| Paludibacter_OTU#303   | 0  | 0  | 0  | 0  | 0  | 0 | 1 | 0 | 0 | 0 | 0 | 0 | 0 | 0 | 0 | 0 | 0 | 0 | 0 | 0 |
| Paludibacter_OTU#303   | 0  | 0  | 0  | 0  | 0  | 0 | 1 | 0 | 0 | 0 | 0 | 0 | 0 | 0 | 0 | 0 | 0 | 0 | 0 | 0 |
| Alkaliflexus_OTU#304   | 0  | 0  | 0  | 0  | 0  | 0 | 1 | 0 | 0 | 0 | 0 | 0 | 0 | 0 | 0 | 0 | 0 | 0 | 0 | 0 |
| Alkaliflexus_OTU#304   | 0  | 0  | 0  | 0  | 0  | 0 | 1 | 0 | 0 | 0 | 0 | 0 | 0 | 0 | 0 | 0 | 0 | 0 | 0 | 0 |
| Paludibacter_OTU#305   | 0  | 0  | 0  | 0  | 0  | 0 | 1 | 0 | 0 | 0 | 0 | 0 | 0 | 0 | 0 | 0 | 0 | 0 | 1 | 0 |
| Paludibacter_OTU#305   | 0  | 0  | 0  | 0  | 0  | 0 | 1 | 0 | 0 | 0 | 0 | 0 | 0 | 0 | 0 | 0 | 0 | 0 | 1 | 0 |
| Streptococcus_OTU#306  | 0  | 0  | 0  | 0  | 0  | 0 | 1 | 0 | 0 | 0 | 0 | 0 | 0 | 0 | 0 | 0 | 0 | 0 | 0 | 0 |
| Streptococcus_OTU#306  | 0  | 0  | 0  | 0  | 0  | 0 | 1 | 0 | 0 | 0 | 0 | 0 | 0 | 0 | 0 | 0 | 0 | 0 | 0 | 0 |
| Streptophyta_OTU#307   | 0  | 0  | 0  | 0  | 0  | 0 | 1 | 0 | 0 | 0 | 0 | 0 | 0 | 0 | 0 | 0 | 0 | 0 | 0 | 0 |
| Streptophyta_OTU#307   | 0  | 0  | 0  | 0  | 0  | 0 | 1 | 0 | 0 | 0 | 0 | 0 | 0 | 0 | 0 | 0 | 0 | 0 | 0 | 0 |
| Paludibacter_OTU#308   | 0  | 0  | 0  | 0  | 0  | 0 | 1 | 0 | 0 | 0 | 0 | 0 | 0 | 0 | 0 | 0 | 0 | 0 | 0 | 0 |
| Paludibacter_OTU#308   | 0  | 0  | 0  | 0  | 0  | 0 | 1 | 0 | 0 | 0 | 0 | 0 | 0 | 0 | 0 | 0 | 0 | 0 | 0 | 0 |
| Enterorhabdus_OTU#309  | 0  | 0  | 0  | 0  | 0  | 0 | 1 | 0 | 0 | 0 | 0 | 0 | 0 | 0 | 0 | 0 | 0 | 0 | 0 | 0 |
| Enterorhabdus_OTU#309  | 0  | 0  | 0  | 0  | 0  | 0 | 1 | 0 | 0 | 0 | 0 | 0 | 0 | 0 | 0 | 0 | 0 | 0 | 0 | 0 |
| Barnesiella_OTU#310    | 0  | 0  | 0  | 0  | 0  | 0 | 1 | 0 | 0 | 0 | 1 | 0 | 0 | 0 | 0 | 0 | 0 | 0 | 0 | 0 |
| Barnesiella_OTU#310    | 0  | 0  | 0  | 0  | 0  | 0 | 1 | 0 | 0 | 0 | 1 | 0 | 0 | 0 | 0 | 0 | 0 | 0 | 0 | 0 |
| Paludibacter_OTU#311   | 0  | 0  | 0  | 0  | 0  | 0 | 1 | 0 | 0 | 0 | 0 | 0 | 0 | 0 | 0 | 0 | 0 | 0 | 0 | 0 |
| Paludibacter_OTU#311   | 0  | 0  | 0  | 0  | 0  | 0 | 1 | 0 | 0 | 0 | 0 | 0 | 0 | 0 | 0 | 0 | 0 | 0 | 0 | 0 |
| Parasutterella_OTU#312 | 0  | 0  | 0  | 0  | 0  | 0 | 1 | 0 | 0 | 0 | 0 | 0 | 0 | 0 | 0 | 0 | 0 | 0 | 0 | 0 |
| Parasutterella_OTU#312 | 0  | 0  | 0  | 0  | 0  | 0 | 1 | 0 | 0 | 0 | 0 | 0 | 0 | 0 | 0 | 0 | 0 | 0 | 0 | 0 |
| Barnesiella_OTU#313    | 0  | 0  | 0  | 0  | 0  | 0 | 1 | 0 | 0 | 0 | 0 | 0 | 0 | 0 | 0 | 0 | 0 | 0 | 0 | 0 |
| Barnesiella_OTU#313    | 0  | 0  | 0  | 0  | 0  | 0 | 1 | 0 | 0 | 0 | 0 | 0 | 0 | 0 | 0 | 0 | 0 | 0 | 0 | 0 |
| Eggerthella_OTU#314    | 0  | 0  | 0  | 0  | 0  | 0 | 2 | 0 | 0 | 0 | 0 | 0 | 0 | 0 | 0 | 0 | 0 | 0 | 0 | 0 |
| Eggerthella_OTU#314    | 0  | 0  | 0  | 0  | 0  | 0 | 2 | 0 | 0 | 0 | 0 | 0 | 0 | 0 | 0 | 0 | 0 | 0 | 0 | 0 |
| Anaerotruncus_OTU#315  | 0  | 0  | 0  | 0  | 0  | 0 | 1 | 0 | 0 | 0 | 0 | 0 | 0 | 0 | 0 | 0 | 0 | 0 | 0 | 0 |
| Anaerotruncus_OTU#315  | 0  | 0  | 0  | 0  | 0  | 0 | 1 | 0 | 0 | 0 | 0 | 0 | 0 | 0 | 0 | 0 | 0 | 0 | 0 | 0 |
| Barnesiella_OTU#316    | 0  | 0  | 0  | 0  | 0  | 0 | 1 | 0 | 0 | 0 | 0 | 0 | 0 | 0 | 0 | 0 | 0 | 0 | 0 | 0 |
| Barnesiella_OTU#316    | 0  | 0  | 0  | 0  | 0  | 0 | 1 | 0 | 0 | 0 | 0 | 0 | 0 | 0 | 0 | 0 | 0 | 0 | 0 | 0 |
| Paludibacter_OTU#317   | 1  | 0  | 0  | 0  | 0  | 0 | 1 | 0 | 0 | 0 | 1 | 0 | 0 | 0 | 0 | 0 | 0 | 0 | 0 | 0 |
| Paludibacter_OTU#317   | 1  | 0  | 0  | 0  | 0  | 0 | 1 | 0 | 0 | 0 | 1 | 0 | 0 | 0 | 0 | 0 | 0 | 0 | 0 | 0 |
| Limibacter_OTU#318     | 2  | 0  | 0  | 0  | 2  | 0 | 1 | 0 | 0 | 0 | 0 | 0 | 0 | 0 | 0 | 0 | 0 | 0 | 0 | 0 |
| Limibacter_OTU#318     | 2  | 0  | 0  | 0  | 2  | 0 | 1 | 0 | 0 | 0 | 0 | 0 | 0 | 0 | 0 | 0 | 0 | 0 | 0 | 0 |
| Parasutterella_OTU#319 | 0  | 0  | 0  | 0  | 0  | 0 | 1 | 0 | 0 | 0 | 0 | 0 | 0 | 0 | 0 | 0 | 0 | 0 | 0 | 0 |
| Parasutterella_OTU#319 | 0  | 0  | 0  | 0  | 0  | 0 | 1 | 0 | 0 | 0 | 0 | 0 | 0 | 0 | 0 | 0 | 0 | 0 | 0 | 0 |

Supplementary Table 1

|                                    |   |   |   |   |   |   |    |   |   |   |   |   |   |   |   |   |   |   |   |   |
|------------------------------------|---|---|---|---|---|---|----|---|---|---|---|---|---|---|---|---|---|---|---|---|
| Limibacter_OTU#320                 | 0 | 0 | 0 | 0 | 0 | 0 | 1  | 0 | 0 | 0 | 0 | 0 | 0 | 0 | 0 | 0 | 0 | 0 | 0 | 0 |
| Barnesiella_OTU#321                | 0 | 0 | 0 | 0 | 0 | 0 | 1  | 0 | 0 | 0 | 0 | 0 | 0 | 0 | 0 | 0 | 0 | 0 | 0 | 0 |
| Paludibacter_OTU#322               | 0 | 0 | 0 | 0 | 0 | 0 | 1  | 0 | 0 | 0 | 0 | 0 | 0 | 0 | 0 | 0 | 0 | 0 | 0 | 0 |
| Limibacter_OTU#323                 | 0 | 0 | 0 | 0 | 0 | 0 | 1  | 0 | 0 | 0 | 0 | 0 | 0 | 0 | 0 | 0 | 0 | 0 | 0 | 0 |
| Parasutterella_OTU#324             | 0 | 0 | 0 | 0 | 0 | 0 | 1  | 0 | 0 | 0 | 0 | 0 | 0 | 0 | 0 | 0 | 0 | 0 | 0 | 0 |
| Paludibacter_OTU#325               | 6 | 8 | 0 | 4 | 3 | 1 | 1  | 0 | 0 | 0 | 0 | 0 | 0 | 0 | 0 | 0 | 0 | 0 | 0 | 0 |
| unclassified Bacteroidales_OTU#326 | 2 | 0 | 0 | 1 | 2 | 0 | 1  | 0 | 0 | 0 | 0 | 0 | 0 | 0 | 0 | 0 | 0 | 0 | 0 | 0 |
| Limibacter_OTU#327                 | 0 | 1 | 0 | 0 | 0 | 0 | 1  | 0 | 0 | 0 | 0 | 0 | 0 | 0 | 0 | 0 | 0 | 0 | 0 | 0 |
| Limibacter_OTU#328                 | 4 | 1 | 0 | 0 | 0 | 0 | 1  | 0 | 0 | 0 | 0 | 0 | 0 | 0 | 0 | 0 | 0 | 0 | 0 | 0 |
| Barnesiella_OTU#329                | 0 | 0 | 0 | 0 | 0 | 0 | 2  | 0 | 0 | 0 | 0 | 0 | 0 | 0 | 0 | 0 | 0 | 0 | 0 | 0 |
| Enterorhabdus_OTU#330              | 0 | 0 | 1 | 0 | 0 | 0 | 5  | 3 | 0 | 0 | 0 | 0 | 0 | 0 | 0 | 0 | 0 | 0 | 0 | 0 |
| Parasutterella_OTU#331             | 0 | 0 | 0 | 0 | 0 | 0 | 1  | 0 | 0 | 0 | 0 | 0 | 0 | 0 | 0 | 0 | 0 | 0 | 0 | 0 |
| Paludibacter_OTU#332               | 0 | 1 | 0 | 0 | 0 | 0 | 1  | 0 | 0 | 0 | 0 | 0 | 0 | 0 | 0 | 0 | 0 | 0 | 0 | 0 |
| Unclassified Bacteroidetes_OTU#333 | 0 | 1 | 0 | 0 | 0 | 0 | 1  | 0 | 0 | 0 | 0 | 0 | 0 | 0 | 0 | 0 | 0 | 0 | 0 | 0 |
| Limibacter_OTU#334                 | 2 | 3 | 2 | 6 | 2 | 0 | 10 | 5 | 0 | 0 | 0 | 0 | 0 | 0 | 0 | 0 | 0 | 0 | 0 | 0 |
| Paludibacter_OTU#335               | 0 | 0 | 0 | 0 | 0 | 0 | 1  | 0 | 0 | 0 | 0 | 0 | 0 | 0 | 0 | 0 | 0 | 0 | 0 | 0 |
| Paludibacter_OTU#336               | 0 | 0 | 0 | 0 | 0 | 0 | 1  | 0 | 0 | 0 | 0 | 0 | 0 | 0 | 0 | 0 | 0 | 0 | 0 | 0 |
| Limibacter_OTU#337                 | 0 | 0 | 0 | 0 | 1 | 0 | 1  | 0 | 0 | 0 | 0 | 0 | 0 | 0 | 0 | 0 | 0 | 0 | 0 | 0 |
| Parasutterella_OTU#338             | 0 | 0 | 0 | 0 | 0 | 0 | 1  | 0 | 0 | 0 | 0 | 0 | 0 | 0 | 0 | 0 | 0 | 0 | 0 | 0 |
| Barnesiella_OTU#339                | 0 | 0 | 0 | 0 | 0 | 0 | 1  | 0 | 0 | 0 | 0 | 0 | 0 | 0 | 0 | 0 | 0 | 0 | 0 | 0 |
| Streptophyta_OTU#340               | 0 | 0 | 0 | 0 | 0 | 0 | 6  | 0 | 0 | 0 | 1 | 0 | 0 | 0 | 0 | 0 | 0 | 0 | 0 | 0 |
| Paludibacter_OTU#341               | 0 | 0 | 0 | 0 | 0 | 0 | 1  | 0 | 0 | 0 | 0 | 0 | 0 | 0 | 0 | 0 | 0 | 0 | 0 | 0 |
| Barnesiella_OTU#342                | 0 | 0 | 0 | 0 | 0 | 0 | 1  | 0 | 0 | 0 | 0 | 0 | 0 | 0 | 0 | 0 | 0 | 0 | 0 | 0 |
| Tannerella_OTU#343                 | 0 | 0 | 0 | 0 | 1 | 0 | 1  | 1 | 0 | 0 | 1 | 0 | 0 | 0 | 0 | 0 | 0 | 0 | 0 | 0 |
| Barnesiella_OTU#344                | 0 | 0 | 0 | 0 | 0 | 0 | 51 | 1 | 0 | 0 | 0 | 0 | 0 | 0 | 0 | 0 | 0 | 0 | 0 | 0 |
| Paludibacter_OTU#345               | 0 | 0 | 0 | 0 | 0 | 0 | 1  | 0 | 0 | 0 | 0 | 0 | 0 | 0 | 0 | 0 | 0 | 0 | 0 | 0 |
| Paludibacter_OTU#346               | 0 | 0 | 0 | 0 | 0 | 0 | 1  | 0 | 0 | 0 | 0 | 0 | 0 | 0 | 0 | 0 | 0 | 0 | 0 | 0 |
| Limibacter_OTU#347                 | 0 | 0 | 0 | 0 | 0 | 0 | 2  | 0 | 0 | 0 | 0 | 0 | 0 | 0 | 0 | 0 | 0 | 0 | 0 | 0 |
| Barnesiella_OTU#348                | 0 | 0 | 0 | 0 | 0 | 0 | 1  | 0 | 0 | 0 | 0 | 0 | 0 | 0 | 0 | 0 | 0 | 0 | 0 | 0 |
| Limibacter_OTU#349                 | 0 | 0 | 0 | 0 | 0 | 0 | 1  | 0 | 0 | 0 | 0 | 0 | 0 | 0 | 0 | 0 | 0 | 0 | 0 | 0 |
| Alistipes_OTU#350                  | 0 | 0 | 0 | 0 | 0 | 0 | 1  | 0 | 0 | 0 | 0 | 0 | 0 | 0 | 0 | 0 | 0 | 0 | 0 | 0 |
| Parasutterella_OTU#351             | 0 | 0 | 0 | 0 | 0 | 0 | 1  | 0 | 0 | 0 | 0 | 0 | 0 | 0 | 0 | 0 | 0 | 0 | 0 | 0 |
| Rikenella_OTU#352                  | 0 | 0 | 0 | 0 | 0 | 0 | 1  | 0 | 0 | 0 | 0 | 0 | 0 | 0 | 0 | 0 | 0 | 0 | 0 | 0 |

Supplementary Table 1

|                                    |   |   |   |   |   |   |   |   |   |   |   |   |   |   |   |   |   |   |   |   |
|------------------------------------|---|---|---|---|---|---|---|---|---|---|---|---|---|---|---|---|---|---|---|---|
| Ureaplasma_OTU#353                 | 0 | 0 | 0 | 0 | 0 | 0 | 1 | 0 | 0 | 0 | 0 | 0 | 0 | 0 | 0 | 0 | 0 | 0 | 0 | 0 |
| Paludibacter_OTU#354               | 0 | 0 | 0 | 0 | 0 | 0 | 1 | 0 | 0 | 0 | 0 | 0 | 0 | 0 | 0 | 0 | 0 | 0 | 0 | 0 |
| Adlercreutzia_OTU#355              | 0 | 0 | 0 | 0 | 0 | 0 | 1 | 0 | 0 | 0 | 0 | 0 | 0 | 0 | 0 | 0 | 0 | 0 | 0 | 0 |
| Paludibacter_OTU#356               | 0 | 0 | 0 | 0 | 0 | 0 | 1 | 0 | 0 | 0 | 4 | 0 | 0 | 0 | 0 | 0 | 0 | 0 | 0 | 0 |
| Barnesiella_OTU#357                | 0 | 0 | 0 | 0 | 0 | 0 | 1 | 0 | 0 | 0 | 0 | 0 | 0 | 0 | 0 | 0 | 0 | 0 | 0 | 0 |
| Dorea_OTU#358                      | 0 | 0 | 0 | 0 | 0 | 0 | 1 | 0 | 0 | 0 | 0 | 0 | 0 | 0 | 0 | 0 | 0 | 0 | 0 | 0 |
| Adlercreutzia_OTU#359              | 0 | 0 | 0 | 0 | 0 | 0 | 1 | 0 | 0 | 0 | 0 | 0 | 0 | 0 | 0 | 0 | 0 | 0 | 0 | 0 |
| Coprococcus_OTU#360                | 0 | 0 | 0 | 0 | 0 | 0 | 1 | 0 | 0 | 0 | 0 | 0 | 0 | 0 | 0 | 0 | 0 | 0 | 0 | 0 |
| Paludibacter_OTU#361               | 0 | 0 | 0 | 0 | 0 | 0 | 1 | 0 | 0 | 0 | 0 | 0 | 0 | 0 | 0 | 0 | 0 | 0 | 0 | 0 |
| Paludibacter_OTU#362               | 0 | 0 | 0 | 0 | 0 | 0 | 1 | 0 | 0 | 0 | 0 | 0 | 0 | 0 | 0 | 0 | 0 | 0 | 0 | 0 |
| Roseburia_OTU#363                  | 0 | 0 | 0 | 0 | 0 | 0 | 0 | 1 | 0 | 0 | 0 | 0 | 0 | 0 | 0 | 0 | 0 | 0 | 0 | 0 |
| Paludibacter_OTU#364               | 0 | 2 | 0 | 0 | 0 | 0 | 1 | 1 | 0 | 0 | 0 | 0 | 0 | 0 | 0 | 0 | 0 | 0 | 0 | 0 |
| Oscillibacter_OTU#365              | 0 | 0 | 0 | 0 | 0 | 0 | 0 | 1 | 0 | 0 | 0 | 0 | 0 | 0 | 0 | 0 | 0 | 0 | 0 | 0 |
| Limibacter_OTU#366                 | 0 | 0 | 0 | 0 | 0 | 0 | 0 | 1 | 0 | 0 | 0 | 0 | 0 | 0 | 0 | 0 | 0 | 0 | 0 | 0 |
| Unclassified TM7_OTU#367           | 0 | 0 | 0 | 0 | 0 | 0 | 0 | 1 | 0 | 0 | 0 | 0 | 0 | 0 | 0 | 0 | 0 | 0 | 0 | 0 |
| Lachnobacterium_OTU#368            | 0 | 0 | 0 | 0 | 0 | 0 | 0 | 1 | 0 | 0 | 0 | 0 | 0 | 0 | 0 | 0 | 0 | 0 | 0 | 0 |
| Tannerella_OTU#369                 | 0 | 0 | 0 | 0 | 0 | 0 | 0 | 1 | 0 | 0 | 0 | 0 | 0 | 0 | 0 | 0 | 0 | 0 | 0 | 0 |
| Pseudozobellia_OTU#370             | 0 | 0 | 0 | 0 | 0 | 0 | 0 | 2 | 0 | 0 | 0 | 0 | 0 | 0 | 0 | 0 | 0 | 1 | 0 | 0 |
| Acetitomaculum_OTU#371             | 0 | 0 | 0 | 0 | 0 | 0 | 0 | 1 | 0 | 0 | 0 | 0 | 0 | 0 | 0 | 0 | 0 | 0 | 0 | 0 |
| Marvinbryantia_OTU#372             | 0 | 0 | 0 | 0 | 0 | 0 | 0 | 1 | 0 | 0 | 0 | 0 | 0 | 0 | 0 | 0 | 0 | 0 | 0 | 0 |
| Paludibacter_OTU#373               | 0 | 0 | 0 | 0 | 0 | 0 | 0 | 1 | 0 | 0 | 0 | 0 | 0 | 0 | 0 | 0 | 0 | 0 | 0 | 0 |
| Syntrophococcus_OTU#374            | 0 | 0 | 0 | 0 | 0 | 0 | 0 | 1 | 0 | 0 | 0 | 0 | 0 | 0 | 0 | 0 | 0 | 0 | 0 | 0 |
| Coprococcus_OTU#375                | 0 | 0 | 0 | 0 | 0 | 0 | 0 | 2 | 0 | 0 | 0 | 0 | 0 | 0 | 0 | 0 | 0 | 0 | 0 | 0 |
| Paludibacter_OTU#376               | 0 | 0 | 0 | 0 | 0 | 0 | 0 | 1 | 0 | 0 | 1 | 0 | 0 | 0 | 0 | 0 | 0 | 0 | 0 | 0 |
| Anaerovorax_OTU#377                | 0 | 0 | 0 | 0 | 0 | 0 | 0 | 2 | 0 | 0 | 0 | 0 | 0 | 0 | 0 | 0 | 0 | 0 | 0 | 0 |
| Lactonifactor_OTU#378              | 0 | 0 | 0 | 0 | 0 | 0 | 0 | 1 | 0 | 0 | 0 | 0 | 0 | 0 | 0 | 0 | 0 | 0 | 0 | 0 |
| Roseburia_OTU#379                  | 0 | 0 | 0 | 0 | 0 | 0 | 0 | 1 | 0 | 0 | 0 | 0 | 0 | 0 | 0 | 0 | 0 | 0 | 0 | 0 |
| Anaerotruncus_OTU#380              | 0 | 0 | 0 | 0 | 0 | 0 | 0 | 1 | 0 | 0 | 0 | 0 | 0 | 0 | 0 | 0 | 0 | 0 | 0 | 0 |
| Anaerovorax_OTU#381                | 0 | 0 | 0 | 0 | 0 | 0 | 0 | 3 | 0 | 0 | 0 | 0 | 0 | 0 | 0 | 0 | 0 | 0 | 0 | 0 |
| Unclassified Bacteroidales_OTU#382 | 0 | 1 | 0 | 0 | 0 | 0 | 0 | 1 | 0 | 0 | 0 | 0 | 0 | 0 | 0 | 0 | 0 | 0 | 0 | 0 |
| Anaerophaga_OTU#383                | 0 | 0 | 0 | 0 | 0 | 0 | 0 | 1 | 0 | 0 | 0 | 0 | 0 | 0 | 0 | 0 | 0 | 0 | 0 | 0 |
| Anaerostipes_OTU#384               | 0 | 0 | 0 | 0 | 0 | 0 | 1 | 1 | 0 | 0 | 0 | 0 | 0 | 0 | 0 | 0 | 0 | 0 | 0 | 0 |
| Paludibacter_OTU#385               | 0 | 0 | 0 | 0 | 0 | 0 | 0 | 1 | 0 | 0 | 0 | 0 | 0 | 0 | 0 | 0 | 0 | 0 | 0 | 0 |

Supplementary Table 1

|                                 |   |   |   |   |   |   |    |    |   |   |   |   |   |   |   |   |   |   |   |   |
|---------------------------------|---|---|---|---|---|---|----|----|---|---|---|---|---|---|---|---|---|---|---|---|
| Dorea_OTU#386                   | 0 | 0 | 0 | 0 | 0 | 0 | 0  | 1  | 0 | 0 | 0 | 0 | 0 | 0 | 0 | 0 | 0 | 0 | 0 | 0 |
| Coprococcus_OTU#387             | 0 | 0 | 0 | 0 | 0 | 0 | 0  | 1  | 0 | 0 | 0 | 0 | 0 | 0 | 0 | 0 | 0 | 0 | 0 | 0 |
| Dorea_OTU#388                   | 0 | 0 | 0 | 0 | 0 | 0 | 0  | 1  | 0 | 0 | 0 | 0 | 0 | 0 | 0 | 0 | 0 | 0 | 0 | 0 |
| Anaerotruncus_OTU#389           | 0 | 0 | 0 | 0 | 0 | 0 | 0  | 1  | 0 | 0 | 0 | 0 | 0 | 0 | 0 | 0 | 0 | 0 | 0 | 0 |
| Dorea_OTU#390                   | 0 | 0 | 0 | 0 | 0 | 0 | 0  | 1  | 0 | 0 | 0 | 0 | 0 | 0 | 0 | 0 | 0 | 0 | 0 | 0 |
| Unclassified_TM7_OTU#391        | 0 | 0 | 0 | 0 | 0 | 0 | 0  | 1  | 0 | 0 | 0 | 0 | 0 | 0 | 0 | 0 | 0 | 0 | 0 | 0 |
| Unclassified_Clostridia_OTU#392 | 0 | 0 | 0 | 0 | 0 | 0 | 0  | 2  | 0 | 0 | 0 | 0 | 0 | 0 | 0 | 0 | 0 | 0 | 0 | 0 |
| Anaerostipes_OTU#393            | 0 | 0 | 0 | 0 | 0 | 0 | 0  | 1  | 0 | 0 | 0 | 0 | 0 | 0 | 0 | 0 | 0 | 0 | 0 | 0 |
| Paludibacter_OTU#394            | 0 | 0 | 0 | 0 | 0 | 0 | 0  | 1  | 0 | 0 | 0 | 0 | 0 | 0 | 0 | 0 | 0 | 0 | 0 | 0 |
| Mucispirillum_OTU#395           | 0 | 0 | 0 | 0 | 0 | 0 | 0  | 2  | 0 | 0 | 0 | 0 | 0 | 0 | 0 | 0 | 0 | 0 | 0 | 0 |
| Paludibacter_OTU#396            | 0 | 0 | 0 | 0 | 0 | 0 | 0  | 1  | 0 | 0 | 0 | 0 | 0 | 0 | 0 | 0 | 0 | 0 | 0 | 0 |
| Atopobacter_OTU#397             | 0 | 0 | 0 | 0 | 0 | 0 | 0  | 6  | 0 | 0 | 0 | 0 | 0 | 0 | 0 | 0 | 0 | 0 | 0 | 0 |
| Paludibacter_OTU#398            | 0 | 0 | 0 | 0 | 0 | 0 | 0  | 1  | 0 | 0 | 0 | 0 | 0 | 0 | 0 | 0 | 0 | 0 | 0 | 0 |
| Syntrophococcus_OTU#399         | 0 | 0 | 0 | 0 | 0 | 0 | 0  | 1  | 0 | 0 | 0 | 0 | 0 | 0 | 0 | 0 | 0 | 0 | 0 | 0 |
| Robinsoniella_OTU#400           | 0 | 0 | 0 | 0 | 0 | 0 | 0  | 3  | 0 | 0 | 0 | 0 | 0 | 0 | 0 | 0 | 0 | 0 | 0 | 0 |
| Limibacter_OTU#401              | 0 | 0 | 0 | 0 | 0 | 0 | 0  | 1  | 0 | 0 | 0 | 0 | 0 | 0 | 0 | 0 | 0 | 0 | 0 | 0 |
| Paludibacter_OTU#402            | 0 | 1 | 0 | 1 | 0 | 0 | 15 | 15 | 0 | 0 | 0 | 0 | 0 | 0 | 0 | 0 | 0 | 0 | 0 | 0 |
| Paludibacter_OTU#403            | 1 | 2 | 0 | 1 | 1 | 0 | 4  | 1  | 0 | 0 | 0 | 0 | 0 | 0 | 0 | 0 | 0 | 0 | 0 | 0 |
| Anaerophaga_OTU#404             | 0 | 3 | 0 | 0 | 0 | 0 | 1  | 3  | 0 | 0 | 0 | 0 | 0 | 0 | 0 | 0 | 0 | 0 | 0 | 0 |
| Flexithrix_OTU#405              | 0 | 3 | 2 | 0 | 0 | 0 | 4  | 13 | 0 | 0 | 0 | 0 | 0 | 0 | 0 | 0 | 0 | 0 | 0 | 0 |
| Dorea_OTU#406                   | 0 | 0 | 0 | 0 | 0 | 0 | 0  | 1  | 0 | 0 | 0 | 0 | 0 | 0 | 0 | 0 | 0 | 0 | 0 | 0 |
| Limibacter_OTU#407              | 1 | 1 | 0 | 0 | 2 | 0 | 0  | 1  | 0 | 0 | 0 | 0 | 0 | 0 | 0 | 0 | 0 | 0 | 0 | 0 |
| Roseburia_OTU#408               | 0 | 0 | 0 | 0 | 0 | 0 | 0  | 1  | 0 | 0 | 0 | 0 | 0 | 0 | 0 | 0 | 0 | 0 | 0 | 0 |
| Paludibacter_OTU#409            | 0 | 0 | 0 | 0 | 0 | 0 | 0  | 1  | 0 | 0 | 0 | 0 | 0 | 0 | 0 | 0 | 0 | 0 | 0 | 0 |
| Anaerotruncus_OTU#410           | 0 | 0 | 0 | 0 | 0 | 0 | 0  | 1  | 0 | 0 | 0 | 0 | 0 | 0 | 0 | 0 | 0 | 0 | 0 | 0 |
| Limibacter_OTU#411              | 0 | 0 | 0 | 0 | 0 | 0 | 0  | 1  | 0 | 0 | 0 | 0 | 0 | 0 | 0 | 0 | 0 | 0 | 0 | 0 |
| Hallella_OTU#412                | 0 | 0 | 0 | 0 | 0 | 0 | 0  | 1  | 0 | 0 | 0 | 0 | 0 | 0 | 0 | 0 | 0 | 0 | 0 | 0 |
| Robinsoniella_OTU#413           | 0 | 0 | 0 | 0 | 0 | 0 | 0  | 1  | 0 | 0 | 0 | 0 | 0 | 0 | 0 | 0 | 0 | 0 | 0 | 0 |
| Tannerella_OTU#414              | 0 | 1 | 0 | 0 | 0 | 0 | 1  | 2  | 0 | 0 | 0 | 0 | 0 | 0 | 0 | 0 | 0 | 0 | 0 | 0 |
| Paludibacter_OTU#415            | 0 | 0 | 0 | 1 | 0 | 0 | 0  | 1  | 0 | 0 | 0 | 0 | 0 | 0 | 0 | 0 | 0 | 0 | 0 | 0 |
| Paludibacter_OTU#416            | 0 | 0 | 0 | 0 | 0 | 0 | 0  | 1  | 0 | 0 | 0 | 0 | 0 | 0 | 0 | 0 | 0 | 0 | 0 | 0 |
| Dorea_OTU#417                   | 0 | 0 | 0 | 0 | 0 | 0 | 4  | 27 | 0 | 0 | 0 | 0 | 0 | 0 | 0 | 0 | 0 | 0 | 0 | 0 |
| Paludibacter_OTU#418            | 0 | 0 | 1 | 0 | 0 | 0 | 12 | 13 | 0 | 0 | 0 | 0 | 0 | 0 | 0 | 0 | 0 | 0 | 0 | 0 |

Supplementary Table 1

|                            |    |    |   |   |   |   |    |    |   |   |    |   |   |   |   |   |   |   |   |   |
|----------------------------|----|----|---|---|---|---|----|----|---|---|----|---|---|---|---|---|---|---|---|---|
| Limibacter_OTU#419         | 0  | 0  | 0 | 0 | 0 | 0 | 0  | 1  | 0 | 0 | 0  | 0 | 0 | 0 | 0 | 0 | 0 | 0 | 0 | 0 |
| Paludibacter_OTU#420       | 0  | 0  | 0 | 0 | 0 | 0 | 1  | 1  | 0 | 0 | 0  | 0 | 0 | 0 | 0 | 0 | 0 | 0 | 0 | 0 |
| Marvinbryantia_OTU#421     | 0  | 0  | 0 | 0 | 0 | 0 | 0  | 2  | 0 | 0 | 0  | 0 | 0 | 0 | 0 | 0 | 0 | 0 | 0 | 0 |
| Syntrophococcus_OTU#422    | 0  | 0  | 0 | 0 | 0 | 0 | 0  | 1  | 0 | 0 | 0  | 0 | 0 | 0 | 0 | 0 | 0 | 0 | 0 | 0 |
| Proteiniphilum_OTU#423     | 0  | 0  | 0 | 0 | 0 | 0 | 0  | 1  | 0 | 0 | 0  | 0 | 0 | 0 | 0 | 0 | 0 | 0 | 0 | 0 |
| Roseburia_OTU#424          | 0  | 0  | 0 | 0 | 0 | 0 | 0  | 1  | 0 | 0 | 0  | 0 | 0 | 0 | 0 | 0 | 0 | 0 | 0 | 0 |
| Coprococcus_OTU#425        | 0  | 0  | 0 | 0 | 0 | 0 | 0  | 1  | 0 | 0 | 0  | 0 | 0 | 0 | 0 | 0 | 0 | 0 | 0 | 0 |
| Parasporobacterium_OTU#426 | 0  | 0  | 0 | 0 | 0 | 0 | 0  | 2  | 0 | 0 | 0  | 0 | 0 | 0 | 0 | 0 | 0 | 0 | 0 | 0 |
| Paludibacter_OTU#427       | 0  | 0  | 0 | 0 | 0 | 0 | 0  | 1  | 0 | 0 | 0  | 0 | 0 | 0 | 0 | 0 | 0 | 0 | 0 | 0 |
| Flexithrix_OTU#428         | 0  | 0  | 0 | 0 | 0 | 0 | 0  | 1  | 0 | 0 | 0  | 0 | 0 | 0 | 0 | 0 | 0 | 0 | 0 | 0 |
| Limibacter_OTU#429         | 0  | 0  | 0 | 0 | 0 | 0 | 0  | 1  | 0 | 0 | 0  | 0 | 0 | 0 | 0 | 0 | 0 | 0 | 0 | 0 |
| Limibacter_OTU#430         | 1  | 0  | 0 | 1 | 0 | 0 | 2  | 11 | 0 | 0 | 0  | 0 | 0 | 0 | 0 | 0 | 0 | 0 | 0 | 0 |
| Paludibacter_OTU#431       | 0  | 0  | 0 | 0 | 0 | 0 | 0  | 1  | 0 | 0 | 0  | 0 | 0 | 0 | 0 | 0 | 0 | 0 | 0 | 0 |
| Paludibacter_OTU#432       | 0  | 0  | 0 | 0 | 0 | 0 | 0  | 1  | 0 | 0 | 0  | 0 | 0 | 0 | 0 | 0 | 0 | 0 | 0 | 0 |
| Limibacter_OTU#433         | 0  | 0  | 1 | 0 | 0 | 0 | 1  | 3  | 0 | 0 | 0  | 0 | 0 | 0 | 0 | 0 | 0 | 0 | 0 | 0 |
| Limibacter_OTU#434         | 12 | 10 | 1 | 5 | 2 | 0 | 14 | 16 | 0 | 0 | 0  | 0 | 0 | 0 | 0 | 0 | 0 | 0 | 0 | 0 |
| Paludibacter_OTU#435       | 3  | 5  | 0 | 4 | 1 | 1 | 21 | 17 | 0 | 3 | 39 | 0 | 0 | 0 | 0 | 0 | 0 | 0 | 0 | 0 |
| Anaerotruncus_OTU#436      | 0  | 0  | 0 | 0 | 0 | 0 | 0  | 1  | 0 | 0 | 0  | 0 | 0 | 0 | 0 | 0 | 0 | 0 | 0 | 0 |
| Paludibacter_OTU#437       | 0  | 0  | 0 | 0 | 0 | 0 | 0  | 0  | 0 | 0 | 0  | 1 | 0 | 0 | 0 | 0 | 0 | 0 | 0 | 0 |
| Barnesiella_OTU#438        | 0  | 0  | 0 | 0 | 0 | 0 | 0  | 0  | 0 | 0 | 0  | 1 | 0 | 0 | 0 | 0 | 0 | 0 | 0 | 0 |
| Aquiflexum_OTU#439         | 0  | 0  | 0 | 0 | 0 | 0 | 0  | 0  | 0 | 0 | 0  | 1 | 0 | 0 | 0 | 0 | 0 | 0 | 0 | 0 |
| Paraprevotella_OTU#440     | 0  | 0  | 0 | 0 | 0 | 0 | 0  | 0  | 0 | 0 | 0  | 1 | 0 | 0 | 0 | 0 | 0 | 0 | 0 | 0 |
| Prevotella_OTU#441         | 0  | 0  | 0 | 0 | 0 | 0 | 0  | 0  | 0 | 0 | 0  | 1 | 0 | 0 | 0 | 3 | 0 | 0 | 0 | 0 |
| Sharpea_OTU#442            | 0  | 0  | 0 | 0 | 0 | 0 | 0  | 0  | 0 | 0 | 0  | 1 | 0 | 0 | 0 | 0 | 0 | 0 | 0 | 0 |
| Paludibacter_OTU#443       | 0  | 0  | 0 | 0 | 0 | 0 | 0  | 0  | 0 | 0 | 0  | 1 | 0 | 0 | 0 | 0 | 0 | 0 | 0 | 0 |
| Xylanibacter_OTU#444       | 0  | 0  | 0 | 0 | 0 | 0 | 0  | 0  | 0 | 0 | 0  | 1 | 0 | 0 | 0 | 0 | 0 | 0 | 0 | 0 |
| Barnesiella_OTU#445        | 0  | 0  | 0 | 0 | 0 | 0 | 0  | 0  | 0 | 0 | 0  | 1 | 0 | 0 | 0 | 0 | 0 | 0 | 0 | 0 |
| Paludibacter_OTU#446       | 0  | 0  | 0 | 0 | 0 | 0 | 0  | 0  | 0 | 0 | 0  | 1 | 0 | 0 | 0 | 0 | 0 | 0 | 0 | 0 |
| Rikenella_OTU#447          | 0  | 0  | 0 | 0 | 0 | 0 | 0  | 0  | 0 | 0 | 0  | 1 | 0 | 0 | 0 | 0 | 0 | 0 | 0 | 0 |
| Oscillibacter_OTU#448      | 0  | 0  | 0 | 0 | 0 | 0 | 0  | 0  | 0 | 0 | 0  | 1 | 0 | 0 | 0 | 0 | 0 | 0 | 0 | 0 |
| Allobaculum_OTU#449        | 0  | 0  | 0 | 0 | 0 | 0 | 0  | 0  | 0 | 0 | 0  | 1 | 0 | 0 | 0 | 0 | 0 | 0 | 0 | 0 |
| Paludibacter_OTU#450       | 0  | 0  | 0 | 0 | 0 | 0 | 0  | 0  | 0 | 0 | 0  | 1 | 0 | 0 | 0 | 0 | 0 | 0 | 0 | 0 |
| Allobaculum_OTU#451        | 0  | 0  | 0 | 0 | 0 | 0 | 0  | 0  | 0 | 0 | 0  | 1 | 0 | 0 | 0 | 0 | 0 | 0 | 0 | 0 |

Supplementary Table 1

|                                            |   |   |   |   |   |   |   |   |   |   |   |   |   |   |   |   |   |   |   |   |
|--------------------------------------------|---|---|---|---|---|---|---|---|---|---|---|---|---|---|---|---|---|---|---|---|
| Limibacter_OTU#452                         | 0 | 0 | 0 | 0 | 0 | 0 | 0 | 0 | 0 | 0 | 0 | 1 | 0 | 0 | 0 | 0 | 0 | 0 | 0 | 0 |
| Xylanibacter_OTU#453                       | 0 | 0 | 0 | 0 | 0 | 0 | 0 | 0 | 0 | 0 | 0 | 1 | 0 | 0 | 0 | 0 | 0 | 0 | 0 | 0 |
| Garciella_OTU#454                          | 0 | 0 | 0 | 0 | 0 | 0 | 0 | 0 | 0 | 0 | 0 | 1 | 0 | 0 | 0 | 0 | 0 | 0 | 0 | 0 |
| Paludibacter_OTU#455                       | 0 | 0 | 0 | 0 | 0 | 0 | 0 | 0 | 0 | 0 | 0 | 1 | 0 | 0 | 0 | 0 | 0 | 0 | 0 | 0 |
| Parasutterella_OTU#456                     | 0 | 0 | 0 | 0 | 0 | 0 | 0 | 0 | 0 | 0 | 0 | 1 | 1 | 1 | 0 | 1 | 0 | 0 | 0 | 0 |
| Paludibacter_OTU#457                       | 0 | 0 | 0 | 0 | 0 | 0 | 0 | 0 | 0 | 0 | 0 | 1 | 0 | 0 | 0 | 0 | 0 | 0 | 0 | 0 |
| Paludibacter_OTU#458                       | 0 | 0 | 0 | 0 | 0 | 0 | 0 | 0 | 0 | 0 | 0 | 2 | 0 | 0 | 0 | 0 | 0 | 0 | 0 | 0 |
| Paludibacter_OTU#459                       | 0 | 0 | 0 | 0 | 0 | 0 | 0 | 0 | 0 | 0 | 0 | 1 | 0 | 0 | 0 | 0 | 0 | 0 | 0 | 0 |
| Paludibacter_OTU#460                       | 0 | 0 | 0 | 0 | 0 | 0 | 0 | 0 | 0 | 0 | 0 | 1 | 0 | 0 | 0 | 0 | 0 | 0 | 0 | 0 |
| Rikenella_OTU#461                          | 0 | 0 | 0 | 0 | 0 | 0 | 0 | 0 | 0 | 0 | 0 | 1 | 0 | 0 | 0 | 0 | 0 | 0 | 0 | 0 |
| Paludibacter_OTU#462                       | 0 | 0 | 0 | 0 | 0 | 0 | 0 | 0 | 0 | 0 | 0 | 1 | 0 | 0 | 0 | 0 | 0 | 0 | 0 | 0 |
| Paludibacter_OTU#463                       | 0 | 0 | 0 | 0 | 0 | 0 | 0 | 0 | 0 | 0 | 0 | 1 | 0 | 0 | 0 | 0 | 0 | 0 | 0 | 0 |
| Barnesiella_OTU#464                        | 0 | 0 | 0 | 0 | 0 | 0 | 0 | 0 | 0 | 0 | 0 | 1 | 0 | 0 | 0 | 0 | 0 | 0 | 0 | 0 |
| Paludibacter_OTU#465                       | 0 | 0 | 0 | 0 | 0 | 0 | 0 | 0 | 0 | 0 | 0 | 2 | 0 | 0 | 0 | 0 | 0 | 0 | 0 | 0 |
| Unclassified<br>Porphyromonadaceae_OTU#466 | 0 | 0 | 0 | 1 | 0 | 0 | 0 | 0 | 0 | 0 | 0 | 1 | 0 | 0 | 0 | 0 | 0 | 0 | 0 | 0 |
| Roseburia_OTU#467                          | 0 | 0 | 0 | 0 | 0 | 0 | 0 | 0 | 0 | 0 | 0 | 1 | 0 | 0 | 0 | 0 | 0 | 0 | 0 | 0 |
| Tannerella_OTU#468                         | 0 | 0 | 0 | 0 | 0 | 0 | 0 | 0 | 0 | 0 | 0 | 1 | 0 | 0 | 0 | 0 | 0 | 0 | 0 | 0 |
| Tannerella_OTU#469                         | 0 | 0 | 0 | 0 | 0 | 0 | 0 | 0 | 0 | 0 | 0 | 1 | 0 | 0 | 0 | 0 | 0 | 0 | 0 | 0 |
| Paludibacter_OTU#470                       | 0 | 0 | 0 | 0 | 0 | 0 | 0 | 0 | 0 | 0 | 0 | 1 | 0 | 0 | 0 | 0 | 0 | 0 | 0 | 0 |
| Butyricimonas_OTU#471                      | 0 | 0 | 0 | 0 | 0 | 0 | 0 | 0 | 0 | 0 | 0 | 1 | 0 | 0 | 0 | 0 | 0 | 0 | 0 | 0 |
| Paludibacter_OTU#472                       | 0 | 0 | 0 | 0 | 0 | 0 | 0 | 0 | 0 | 0 | 0 | 1 | 0 | 0 | 0 | 0 | 0 | 0 | 0 | 0 |
| Barnesiella_OTU#473                        | 0 | 0 | 0 | 0 | 0 | 0 | 0 | 0 | 0 | 0 | 0 | 1 | 0 | 0 | 0 | 0 | 0 | 0 | 0 | 0 |
| Paludibacter_OTU#474                       | 0 | 0 | 0 | 0 | 0 | 0 | 0 | 0 | 0 | 0 | 0 | 1 | 0 | 0 | 0 | 0 | 0 | 0 | 0 | 0 |
| Barnesiella_OTU#475                        | 0 | 0 | 0 | 0 | 0 | 0 | 0 | 0 | 0 | 0 | 0 | 2 | 0 | 0 | 0 | 1 | 0 | 0 | 0 | 0 |
| Paludibacter_OTU#476                       | 0 | 0 | 0 | 0 | 0 | 0 | 0 | 0 | 0 | 0 | 0 | 1 | 0 | 0 | 0 | 0 | 0 | 0 | 0 | 0 |
| Rikenella_OTU#477                          | 0 | 0 | 0 | 0 | 0 | 0 | 0 | 0 | 0 | 0 | 0 | 1 | 0 | 0 | 0 | 0 | 0 | 0 | 0 | 0 |
| Anaerophaga_OTU#478                        | 0 | 0 | 0 | 0 | 0 | 0 | 0 | 0 | 0 | 0 | 0 | 1 | 0 | 0 | 0 | 0 | 0 | 0 | 0 | 0 |
| Paludibacter_OTU#479                       | 0 | 0 | 0 | 0 | 0 | 0 | 0 | 0 | 0 | 0 | 0 | 1 | 0 | 0 | 0 | 0 | 0 | 0 | 0 | 0 |
| Barnesiella_OTU#480                        | 0 | 1 | 0 | 0 | 0 | 0 | 0 | 0 | 0 | 0 | 0 | 1 | 0 | 0 | 0 | 0 | 0 | 0 | 0 | 0 |
| Paludibacter_OTU#481                       | 0 | 0 | 0 | 0 | 0 | 0 | 0 | 0 | 0 | 0 | 0 | 1 | 0 | 0 | 0 | 0 | 0 | 0 | 0 | 0 |
| Paludibacter_OTU#482                       | 0 | 0 | 0 | 0 | 0 | 0 | 0 | 0 | 0 | 0 | 0 | 1 | 0 | 0 | 0 | 0 | 0 | 0 | 0 | 0 |
| Paraprevotella_OTU#483                     | 0 | 0 | 0 | 0 | 0 | 0 | 0 | 0 | 0 | 0 | 0 | 1 | 0 | 0 | 0 | 0 | 0 | 0 | 0 | 0 |
| Acetitomaculum_OTU#484                     | 0 | 0 | 0 | 0 | 0 | 0 | 0 | 0 | 0 | 0 | 0 | 1 | 0 | 0 | 0 | 0 | 0 | 0 | 0 | 0 |

Supplementary Table 1

|                           |   |   |   |   |   |   |   |   |   |   |   |   |   |   |   |   |   |   |   |   |
|---------------------------|---|---|---|---|---|---|---|---|---|---|---|---|---|---|---|---|---|---|---|---|
| Allobaculum_OTU#485       | 0 | 0 | 0 | 0 | 0 | 0 | 0 | 0 | 0 | 0 | 0 | 0 | 1 | 0 | 0 | 0 | 0 | 0 | 0 | 0 |
| Paludibacter_OTU#486      | 0 | 0 | 0 | 0 | 0 | 0 | 0 | 0 | 0 | 0 | 0 | 0 | 1 | 0 | 0 | 0 | 0 | 0 | 0 | 0 |
| Sharpea_OTU#487           | 0 | 0 | 0 | 0 | 0 | 0 | 0 | 0 | 0 | 0 | 0 | 0 | 1 | 0 | 0 | 0 | 0 | 0 | 0 | 0 |
| Allobaculum_OTU#488       | 0 | 0 | 0 | 0 | 0 | 0 | 0 | 0 | 0 | 0 | 0 | 0 | 1 | 0 | 0 | 0 | 0 | 0 | 0 | 0 |
| Rikenella_OTU#489         | 0 | 0 | 0 | 0 | 0 | 0 | 0 | 0 | 0 | 0 | 0 | 0 | 1 | 0 | 0 | 0 | 0 | 0 | 0 | 0 |
| Paludibacter_OTU#490      | 0 | 0 | 0 | 0 | 0 | 0 | 0 | 0 | 0 | 0 | 0 | 0 | 1 | 0 | 0 | 0 | 0 | 0 | 0 | 0 |
| Solobacterium_OTU#491     | 0 | 0 | 0 | 0 | 0 | 0 | 0 | 0 | 0 | 0 | 0 | 0 | 1 | 0 | 0 | 0 | 0 | 0 | 0 | 0 |
| Rikenella_OTU#492         | 0 | 0 | 0 | 0 | 0 | 0 | 0 | 0 | 0 | 0 | 0 | 0 | 1 | 0 | 0 | 0 | 0 | 0 | 0 | 0 |
| Barnesiella_OTU#493       | 0 | 0 | 0 | 0 | 0 | 0 | 0 | 0 | 0 | 0 | 0 | 0 | 1 | 0 | 0 | 1 | 0 | 0 | 0 | 0 |
| Allobaculum_OTU#494       | 0 | 0 | 0 | 0 | 0 | 0 | 0 | 0 | 0 | 0 | 0 | 0 | 1 | 0 | 0 | 0 | 0 | 0 | 0 | 0 |
| Paludibacter_OTU#495      | 0 | 0 | 0 | 0 | 0 | 0 | 0 | 0 | 0 | 0 | 0 | 0 | 1 | 0 | 0 | 0 | 0 | 0 | 0 | 0 |
| Paludibacter_OTU#496      | 2 | 0 | 0 | 0 | 1 | 0 | 0 | 0 | 0 | 0 | 0 | 0 | 1 | 0 | 0 | 0 | 0 | 0 | 0 | 0 |
| Allobaculum_OTU#497       | 0 | 0 | 0 | 0 | 0 | 0 | 0 | 0 | 0 | 0 | 0 | 0 | 1 | 0 | 0 | 0 | 0 | 0 | 0 | 0 |
| Allobaculum_OTU#498       | 0 | 0 | 0 | 0 | 0 | 0 | 0 | 0 | 0 | 0 | 0 | 0 | 1 | 0 | 0 | 0 | 0 | 0 | 0 | 0 |
| Oscillibacter_OTU#499     | 0 | 0 | 0 | 0 | 0 | 0 | 0 | 0 | 0 | 0 | 0 | 0 | 1 | 0 | 0 | 0 | 0 | 0 | 0 | 0 |
| Allobaculum_OTU#500       | 0 | 0 | 0 | 0 | 0 | 0 | 0 | 0 | 0 | 0 | 0 | 0 | 2 | 0 | 0 | 0 | 1 | 0 | 0 | 0 |
| Parasutterella_OTU#501    | 0 | 0 | 0 | 0 | 0 | 0 | 0 | 0 | 0 | 0 | 0 | 0 | 1 | 0 | 0 | 0 | 0 | 0 | 0 | 0 |
| Tepidanaerobacter_OTU#502 | 0 | 0 | 0 | 0 | 0 | 0 | 0 | 0 | 0 | 0 | 0 | 0 | 1 | 0 | 0 | 0 | 0 | 0 | 0 | 0 |
| Unclassified_TM7_OTU#503  | 0 | 0 | 0 | 0 | 0 | 0 | 0 | 0 | 0 | 0 | 0 | 0 | 1 | 0 | 1 | 0 | 0 | 0 | 0 | 0 |
| Pseudozobellia_OTU#504    | 0 | 0 | 0 | 0 | 0 | 0 | 0 | 0 | 0 | 0 | 0 | 0 | 1 | 0 | 1 | 0 | 1 | 0 | 0 | 0 |
| Rikenella_OTU#505         | 0 | 0 | 0 | 0 | 0 | 0 | 0 | 0 | 0 | 0 | 0 | 0 | 1 | 0 | 0 | 0 | 0 | 0 | 0 | 0 |
| Limibacter_OTU#506        | 0 | 0 | 0 | 0 | 0 | 0 | 0 | 0 | 0 | 0 | 0 | 0 | 1 | 0 | 0 | 0 | 0 | 0 | 0 | 0 |
| Oscillibacter_OTU#507     | 0 | 0 | 0 | 0 | 0 | 0 | 0 | 0 | 0 | 0 | 0 | 0 | 0 | 1 | 0 | 0 | 0 | 0 | 0 | 0 |
| Barnesiella_OTU#508       | 0 | 0 | 0 | 0 | 0 | 0 | 0 | 0 | 0 | 0 | 0 | 0 | 0 | 1 | 0 | 0 | 0 | 0 | 0 | 0 |
| Paludibacter_OTU#509      | 0 | 0 | 0 | 0 | 0 | 0 | 0 | 0 | 0 | 0 | 0 | 0 | 0 | 1 | 0 | 0 | 0 | 0 | 0 | 0 |
| Solobacterium_OTU#510     | 0 | 0 | 0 | 0 | 0 | 0 | 0 | 0 | 0 | 0 | 0 | 0 | 0 | 1 | 0 | 0 | 0 | 0 | 0 | 0 |
| Paludibacter_OTU#511      | 0 | 0 | 0 | 0 | 0 | 0 | 0 | 0 | 0 | 0 | 0 | 0 | 1 | 1 | 0 | 0 | 0 | 0 | 0 | 0 |
| Alistipes_OTU#512         | 0 | 0 | 0 | 0 | 0 | 0 | 0 | 0 | 0 | 0 | 0 | 0 | 0 | 1 | 0 | 0 | 0 | 0 | 0 | 0 |
| Rikenella_OTU#513         | 0 | 0 | 0 | 0 | 0 | 0 | 0 | 0 | 0 | 0 | 0 | 0 | 0 | 1 | 0 | 0 | 0 | 0 | 0 | 0 |
| Rikenella_OTU#514         | 0 | 0 | 0 | 0 | 0 | 0 | 0 | 0 | 0 | 0 | 0 | 0 | 0 | 1 | 0 | 0 | 0 | 0 | 0 | 0 |
| Barnesiella_OTU#515       | 0 | 0 | 0 | 0 | 0 | 0 | 0 | 0 | 0 | 0 | 0 | 0 | 0 | 1 | 0 | 0 | 0 | 0 | 0 | 0 |
| Roseburia_OTU#516         | 0 | 0 | 0 | 0 | 0 | 0 | 0 | 0 | 0 | 0 | 0 | 0 | 0 | 1 | 0 | 0 | 0 | 0 | 0 | 0 |
| Limibacter_OTU#517        | 0 | 0 | 0 | 0 | 0 | 0 | 0 | 0 | 0 | 0 | 0 | 0 | 0 | 1 | 0 | 0 | 0 | 0 | 0 | 0 |

Supplementary Table 1



|                        |   |   |   |   |   |   |   |   |   |   |   |   |   |   |   |   |   |   |   |   |
|------------------------|---|---|---|---|---|---|---|---|---|---|---|---|---|---|---|---|---|---|---|---|
| Alistipes_OTU#518      | 0 | 0 | 0 | 0 | 0 | 0 | 0 | 0 | 0 | 0 | 0 | 0 | 1 | 0 | 0 | 0 | 0 | 0 | 0 | 0 |
| Paludibacter_OTU#519   | 0 | 0 | 0 | 0 | 0 | 0 | 0 | 0 | 0 | 0 | 0 | 0 | 1 | 0 | 0 | 0 | 0 | 0 | 0 | 0 |
| Allobaculum_OTU#520    | 0 | 0 | 0 | 0 | 0 | 0 | 0 | 0 | 0 | 0 | 0 | 0 | 1 | 0 | 0 | 0 | 0 | 0 | 0 | 0 |
| Paludibacter_OTU#521   | 0 | 0 | 0 | 0 | 0 | 0 | 0 | 0 | 0 | 0 | 0 | 0 | 1 | 0 | 0 | 0 | 0 | 0 | 0 | 0 |
| Barnesiella_OTU#522    | 0 | 0 | 0 | 0 | 0 | 0 | 0 | 0 | 0 | 0 | 0 | 0 | 1 | 0 | 0 | 0 | 0 | 0 | 0 | 0 |
| Barnesiella_OTU#523    | 0 | 0 | 0 | 0 | 0 | 0 | 0 | 0 | 0 | 0 | 0 | 0 | 1 | 0 | 0 | 0 | 0 | 0 | 0 | 0 |
| Paludibacter_OTU#524   | 0 | 0 | 0 | 0 | 0 | 0 | 0 | 0 | 0 | 0 | 0 | 0 | 1 | 0 | 0 | 0 | 0 | 0 | 0 | 0 |
| Barnesiella_OTU#525    | 0 | 0 | 0 | 0 | 0 | 0 | 0 | 0 | 0 | 0 | 0 | 1 | 1 | 0 | 0 | 0 | 0 | 0 | 0 | 0 |
| Odoribacter_OTU#526    | 0 | 0 | 0 | 0 | 0 | 0 | 0 | 0 | 0 | 0 | 0 | 0 | 1 | 0 | 0 | 0 | 0 | 0 | 0 | 0 |
| Allobaculum_OTU#527    | 0 | 0 | 0 | 0 | 0 | 0 | 0 | 0 | 0 | 0 | 0 | 0 | 1 | 0 | 0 | 0 | 0 | 0 | 0 | 0 |
| Barnesiella_OTU#528    | 0 | 0 | 0 | 0 | 0 | 0 | 0 | 0 | 0 | 0 | 0 | 1 | 1 | 0 | 0 | 0 | 0 | 0 | 0 | 0 |
| Anaerophaga_OTU#529    | 0 | 0 | 0 | 0 | 0 | 0 | 0 | 0 | 0 | 0 | 0 | 0 | 1 | 0 | 0 | 0 | 0 | 0 | 0 | 0 |
| Paludibacter_OTU#530   | 0 | 0 | 0 | 0 | 0 | 0 | 0 | 0 | 0 | 0 | 0 | 0 | 1 | 0 | 0 | 0 | 0 | 0 | 0 | 0 |
| Barnesiella_OTU#531    | 0 | 0 | 0 | 0 | 0 | 0 | 0 | 0 | 0 | 0 | 0 | 0 | 1 | 0 | 0 | 0 | 0 | 0 | 0 | 0 |
| Paludibacter_OTU#532   | 0 | 0 | 0 | 0 | 0 | 0 | 0 | 0 | 0 | 0 | 0 | 0 | 1 | 0 | 0 | 0 | 0 | 0 | 0 | 0 |
| Paraprevotella_OTU#533 | 0 | 0 | 0 | 0 | 0 | 0 | 0 | 0 | 0 | 0 | 0 | 0 | 1 | 0 | 0 | 0 | 0 | 0 | 0 | 0 |
| Oscillibacter_OTU#534  | 0 | 0 | 0 | 0 | 0 | 0 | 0 | 0 | 0 | 0 | 0 | 1 | 1 | 0 | 0 | 0 | 0 | 0 | 0 | 0 |
| Barnesiella_OTU#535    | 0 | 0 | 0 | 0 | 0 | 0 | 0 | 0 | 0 | 0 | 0 | 0 | 1 | 0 | 0 | 0 | 0 | 0 | 0 | 0 |
| Barnesiella_OTU#536    | 0 | 0 | 0 | 0 | 0 | 0 | 0 | 0 | 0 | 0 | 0 | 0 | 1 | 0 | 0 | 0 | 0 | 0 | 0 | 0 |
| Solobacterium_OTU#537  | 0 | 0 | 0 | 0 | 0 | 0 | 0 | 0 | 0 | 0 | 0 | 0 | 1 | 0 | 0 | 0 | 0 | 0 | 0 | 0 |
| Anaerophaga_OTU#538    | 0 | 0 | 0 | 0 | 0 | 0 | 0 | 0 | 0 | 0 | 0 | 0 | 1 | 0 | 0 | 0 | 0 | 0 | 0 | 0 |
| Alistipes_OTU#539      | 0 | 0 | 0 | 0 | 0 | 0 | 0 | 0 | 0 | 0 | 0 | 0 | 1 | 0 | 0 | 0 | 0 | 0 | 0 | 0 |
| Paludibacter_OTU#540   | 2 | 0 | 0 | 0 | 2 | 0 | 0 | 0 | 0 | 0 | 0 | 0 | 1 | 0 | 0 | 0 | 0 | 0 | 0 | 0 |
| Tannerella_OTU#541     | 0 | 0 | 0 | 0 | 0 | 0 | 0 | 0 | 0 | 0 | 0 | 0 | 1 | 0 | 0 | 0 | 0 | 1 | 0 | 0 |
| Anaerophaga_OTU#542    | 0 | 0 | 0 | 0 | 0 | 0 | 0 | 0 | 0 | 0 | 0 | 0 | 1 | 0 | 0 | 0 | 0 | 0 | 0 | 0 |
| Paludibacter_OTU#543   | 0 | 0 | 0 | 0 | 0 | 0 | 0 | 0 | 0 | 0 | 0 | 0 | 1 | 0 | 0 | 0 | 0 | 0 | 0 | 0 |
| Barnesiella_OTU#544    | 0 | 0 | 0 | 0 | 0 | 0 | 0 | 0 | 0 | 0 | 0 | 0 | 1 | 0 | 0 | 0 | 0 | 0 | 0 | 0 |
| Paludibacter_OTU#545   | 0 | 0 | 0 | 0 | 0 | 0 | 0 | 0 | 0 | 0 | 0 | 0 | 1 | 0 | 0 | 0 | 0 | 0 | 0 | 0 |
| Paludibacter_OTU#546   | 0 | 0 | 0 | 0 | 0 | 0 | 0 | 0 | 0 | 0 | 0 | 0 | 1 | 0 | 0 | 0 | 0 | 0 | 0 | 0 |
| Paludibacter_OTU#547   | 0 | 0 | 0 | 0 | 0 | 0 | 0 | 0 | 0 | 0 | 0 | 0 | 1 | 0 | 0 | 0 | 0 | 0 | 0 | 0 |
| Paludibacter_OTU#548   | 0 | 0 | 0 | 0 | 0 | 0 | 0 | 0 | 0 | 0 | 0 | 0 | 1 | 0 | 0 | 0 | 0 | 0 | 0 | 0 |
| Paludibacter_OTU#549   | 0 | 0 | 0 | 0 | 0 | 0 | 1 | 0 | 0 | 0 | 0 | 0 | 1 | 0 | 0 | 0 | 0 | 0 | 0 | 0 |
| Paludibacter_OTU#550   | 0 | 0 | 0 | 0 | 0 | 0 | 0 | 0 | 0 | 0 | 0 | 0 | 1 | 0 | 0 | 0 | 0 | 0 | 0 | 0 |

Supplementary Table 1

|                         |   |   |   |   |   |   |   |   |   |   |   |   |   |   |   |   |   |   |   |   |
|-------------------------|---|---|---|---|---|---|---|---|---|---|---|---|---|---|---|---|---|---|---|---|
| Syntrophococcus_OTU#551 | 0 | 0 | 0 | 0 | 0 | 0 | 0 | 0 | 0 | 0 | 0 | 0 | 1 | 0 | 0 | 0 | 0 | 0 | 0 | 0 |
| Paludibacter_OTU#552    | 0 | 0 | 0 | 0 | 0 | 0 | 0 | 0 | 0 | 0 | 0 | 0 | 1 | 0 | 0 | 0 | 0 | 0 | 0 | 0 |
| Paludibacter_OTU#553    | 0 | 0 | 0 | 0 | 0 | 0 | 0 | 0 | 0 | 0 | 0 | 0 | 1 | 0 | 0 | 0 | 0 | 0 | 0 | 0 |
| Paludibacter_OTU#554    | 0 | 0 | 0 | 0 | 0 | 0 | 0 | 0 | 0 | 0 | 0 | 0 | 1 | 0 | 0 | 0 | 0 | 0 | 0 | 0 |
| Barnesiella_OTU#555     | 3 | 4 | 0 | 0 | 1 | 0 | 0 | 0 | 0 | 0 | 0 | 0 | 1 | 0 | 0 | 0 | 0 | 0 | 0 | 0 |
| Barnesiella_OTU#556     | 1 | 0 | 0 | 0 | 0 | 0 | 0 | 0 | 0 | 0 | 0 | 0 | 3 | 0 | 0 | 0 | 0 | 0 | 0 | 0 |
| Smithella_OTU#557       | 0 | 0 | 0 | 0 | 0 | 0 | 0 | 1 | 0 | 0 | 0 | 0 | 2 | 0 | 0 | 0 | 0 | 0 | 0 | 0 |
| Paludibacter_OTU#558    | 0 | 0 | 0 | 0 | 0 | 0 | 0 | 0 | 0 | 0 | 0 | 0 | 3 | 0 | 0 | 1 | 0 | 0 | 0 | 1 |
| Paludibacter_OTU#559    | 0 | 0 | 0 | 0 | 0 | 0 | 0 | 0 | 0 | 0 | 0 | 0 | 1 | 0 | 0 | 0 | 0 | 0 | 0 | 0 |
| Paludibacter_OTU#560    | 0 | 0 | 0 | 0 | 0 | 0 | 0 | 0 | 0 | 0 | 0 | 0 | 1 | 0 | 0 | 0 | 0 | 0 | 0 | 0 |
| Prevotella_OTU#561      | 0 | 0 | 0 | 0 | 0 | 0 | 0 | 0 | 0 | 0 | 0 | 0 | 1 | 0 | 0 | 0 | 0 | 0 | 0 | 0 |
| Paludibacter_OTU#562    | 0 | 0 | 0 | 0 | 0 | 0 | 0 | 0 | 0 | 0 | 0 | 0 | 1 | 0 | 0 | 0 | 0 | 0 | 0 | 0 |
| Barnesiella_OTU#563     | 0 | 0 | 0 | 0 | 0 | 0 | 0 | 0 | 0 | 0 | 0 | 0 | 1 | 0 | 0 | 0 | 0 | 0 | 0 | 0 |
| Barnesiella_OTU#564     | 0 | 0 | 0 | 0 | 0 | 0 | 0 | 0 | 0 | 0 | 0 | 0 | 1 | 0 | 0 | 0 | 0 | 0 | 0 | 0 |
| Paludibacter_OTU#565    | 0 | 0 | 0 | 0 | 0 | 0 | 0 | 0 | 0 | 0 | 0 | 0 | 1 | 0 | 0 | 0 | 0 | 0 | 0 | 0 |
| Allobaculum_OTU#566     | 0 | 0 | 0 | 0 | 0 | 0 | 0 | 0 | 0 | 0 | 0 | 0 | 1 | 0 | 0 | 0 | 0 | 0 | 0 | 0 |
| Oscillibacter_OTU#567   | 0 | 0 | 0 | 0 | 0 | 0 | 0 | 0 | 0 | 0 | 0 | 0 | 1 | 0 | 0 | 0 | 0 | 0 | 0 | 0 |
| Paludibacter_OTU#568    | 0 | 0 | 0 | 0 | 0 | 0 | 0 | 0 | 0 | 0 | 0 | 0 | 1 | 0 | 0 | 0 | 0 | 0 | 0 | 0 |
| Paludibacter_OTU#569    | 0 | 0 | 0 | 0 | 0 | 0 | 0 | 0 | 0 | 0 | 0 | 0 | 1 | 0 | 0 | 0 | 0 | 0 | 0 | 0 |
| Barnesiella_OTU#570     | 0 | 0 | 0 | 0 | 0 | 0 | 0 | 0 | 0 | 0 | 0 | 0 | 1 | 0 | 0 | 0 | 0 | 0 | 0 | 0 |
| Allobaculum_OTU#571     | 0 | 0 | 0 | 0 | 0 | 0 | 0 | 0 | 0 | 0 | 0 | 1 | 1 | 2 | 0 | 2 | 0 | 0 | 0 | 0 |
| Paludibacter_OTU#572    | 0 | 0 | 0 | 0 | 0 | 0 | 0 | 0 | 0 | 0 | 0 | 0 | 1 | 0 | 0 | 0 | 0 | 0 | 0 | 0 |
| Paludibacter_OTU#573    | 0 | 0 | 0 | 0 | 0 | 0 | 0 | 0 | 0 | 0 | 0 | 0 | 1 | 0 | 0 | 0 | 0 | 0 | 0 | 0 |
| Allobaculum_OTU#574     | 0 | 0 | 0 | 0 | 0 | 0 | 0 | 0 | 0 | 0 | 0 | 0 | 1 | 0 | 0 | 0 | 0 | 0 | 0 | 0 |
| Barnesiella_OTU#575     | 0 | 0 | 0 | 0 | 0 | 0 | 0 | 0 | 0 | 0 | 0 | 0 | 1 | 0 | 0 | 0 | 0 | 0 | 0 | 0 |
| Oscillibacter_OTU#576   | 0 | 0 | 1 | 0 | 1 | 5 | 0 | 0 | 0 | 0 | 0 | 0 | 1 | 0 | 0 | 0 | 0 | 0 | 0 | 0 |
| Parasutterella_OTU#577  | 0 | 0 | 0 | 0 | 0 | 0 | 0 | 0 | 0 | 0 | 0 | 0 | 1 | 0 | 0 | 0 | 0 | 0 | 0 | 0 |
| Anaerophaga_OTU#578     | 0 | 0 | 0 | 0 | 0 | 0 | 0 | 0 | 0 | 0 | 0 | 0 | 1 | 0 | 0 | 0 | 0 | 0 | 0 | 0 |
| Paludibacter_OTU#579    | 3 | 3 | 0 | 3 | 1 | 0 | 0 | 0 | 0 | 0 | 0 | 1 | 1 | 1 | 1 | 0 | 0 | 0 | 0 | 0 |
| Anaerophaga_OTU#580     | 0 | 1 | 0 | 0 | 0 | 0 | 0 | 1 | 0 | 0 | 0 | 0 | 0 | 1 | 0 | 0 | 0 | 0 | 0 | 0 |
| Paludibacter_OTU#581    | 0 | 0 | 0 | 0 | 0 | 0 | 0 | 0 | 0 | 0 | 0 | 0 | 0 | 1 | 0 | 0 | 0 | 0 | 0 | 0 |
| Barnesiella_OTU#582     | 0 | 0 | 0 | 0 | 0 | 0 | 0 | 0 | 0 | 0 | 0 | 1 | 0 | 1 | 0 | 0 | 0 | 0 | 0 | 0 |
| Barnesiella_OTU#583     | 0 | 0 | 0 | 0 | 0 | 0 | 0 | 0 | 0 | 0 | 0 | 0 | 2 | 1 | 0 | 0 | 0 | 0 | 0 | 0 |

Supplementary Table 1

|                                            |   |   |   |   |   |   |   |   |   |   |   |   |   |   |   |   |   |   |   |   |
|--------------------------------------------|---|---|---|---|---|---|---|---|---|---|---|---|---|---|---|---|---|---|---|---|
| Tuberibacillus_OTU#584                     | 0 | 0 | 0 | 0 | 0 | 0 | 0 | 0 | 0 | 0 | 0 | 0 | 0 | 1 | 1 | 0 | 0 | 0 | 0 | 0 |
| Tuberibacillus_OTU#585                     | 0 | 0 | 0 | 0 | 0 | 0 | 0 | 0 | 0 | 0 | 0 | 0 | 0 | 0 | 1 | 0 | 0 | 0 | 0 | 0 |
| Limibacter_OTU#586                         | 0 | 0 | 0 | 0 | 0 | 0 | 0 | 0 | 0 | 0 | 0 | 0 | 0 | 0 | 1 | 0 | 0 | 0 | 0 | 0 |
| Unclassified<br>Porphyromonadaceae_OTU#587 | 0 | 0 | 0 | 0 | 0 | 0 | 0 | 0 | 0 | 0 | 0 | 1 | 0 | 1 | 0 | 0 | 0 | 0 | 0 | 0 |
| Robinsoniella_OTU#588                      | 0 | 0 | 0 | 0 | 0 | 0 | 0 | 0 | 0 | 0 | 0 | 0 | 0 | 1 | 0 | 0 | 0 | 0 | 0 | 0 |
| Paludibacter_OTU#589                       | 0 | 0 | 0 | 0 | 0 | 0 | 0 | 0 | 0 | 0 | 0 | 0 | 0 | 1 | 0 | 0 | 0 | 0 | 0 | 0 |
| Paludibacter_OTU#590                       | 0 | 0 | 0 | 0 | 0 | 0 | 0 | 0 | 0 | 0 | 0 | 0 | 0 | 1 | 0 | 0 | 0 | 0 | 0 | 0 |
| Tannerella_OTU#591                         | 0 | 0 | 0 | 0 | 0 | 0 | 0 | 0 | 0 | 0 | 0 | 0 | 0 | 1 | 0 | 0 | 0 | 0 | 0 | 0 |
| Paludibacter_OTU#592                       | 0 | 2 | 1 | 1 | 0 | 0 | 0 | 0 | 0 | 0 | 0 | 0 | 0 | 1 | 0 | 0 | 0 | 0 | 0 | 0 |
| Barnesiella_OTU#593                        | 0 | 0 | 0 | 0 | 0 | 0 | 0 | 0 | 0 | 0 | 0 | 1 | 0 | 1 | 0 | 0 | 0 | 0 | 0 | 0 |
| Unclassified Bacteroidales_OTU#594         | 0 | 1 | 0 | 0 | 0 | 0 | 0 | 0 | 0 | 0 | 0 | 0 | 0 | 1 | 0 | 0 | 0 | 0 | 0 | 0 |
| Limibacter_OTU#595                         | 0 | 0 | 0 | 0 | 0 | 0 | 0 | 0 | 0 | 0 | 0 | 0 | 0 | 1 | 0 | 0 | 0 | 0 | 0 | 0 |
| Paludibacter_OTU#596                       | 1 | 1 | 0 | 0 | 0 | 0 | 0 | 0 | 0 | 0 | 0 | 0 | 0 | 2 | 0 | 0 | 0 | 2 | 0 | 1 |
| Unclassified Bacteroidetes_OTU#597         | 0 | 0 | 0 | 0 | 0 | 0 | 0 | 0 | 0 | 0 | 0 | 1 | 0 | 1 | 0 | 0 | 0 | 0 | 0 | 0 |
| Solobacterium_OTU#598                      | 0 | 0 | 0 | 0 | 0 | 0 | 0 | 0 | 0 | 0 | 0 | 0 | 1 | 1 | 0 | 0 | 0 | 0 | 0 | 0 |
| Roseburia_OTU#599                          | 0 | 0 | 0 | 0 | 0 | 0 | 0 | 0 | 0 | 0 | 0 | 0 | 0 | 1 | 0 | 0 | 0 | 0 | 0 | 0 |
| Allobaculum_OTU#600                        | 0 | 0 | 0 | 0 | 0 | 0 | 0 | 0 | 0 | 0 | 0 | 0 | 0 | 1 | 0 | 0 | 0 | 0 | 0 | 0 |
| Allobaculum_OTU#601                        | 0 | 0 | 0 | 0 | 0 | 0 | 0 | 0 | 0 | 0 | 0 | 3 | 1 | 1 | 0 | 1 | 0 | 0 | 0 | 0 |
| Paludibacter_OTU#602                       | 0 | 0 | 0 | 0 | 0 | 0 | 0 | 0 | 0 | 0 | 0 | 0 | 0 | 1 | 0 | 0 | 0 | 0 | 0 | 0 |
| Barnesiella_OTU#603                        | 0 | 0 | 0 | 0 | 0 | 0 | 0 | 0 | 0 | 0 | 0 | 0 | 0 | 1 | 0 | 0 | 0 | 0 | 0 | 0 |
| Paludibacter_OTU#604                       | 0 | 0 | 0 | 0 | 0 | 0 | 0 | 0 | 0 | 0 | 0 | 0 | 1 | 1 | 0 | 0 | 0 | 1 | 0 | 0 |
| Tannerella_OTU#605                         | 0 | 0 | 0 | 0 | 0 | 0 | 0 | 0 | 0 | 0 | 0 | 0 | 0 | 1 | 0 | 0 | 0 | 0 | 0 | 0 |
| Barnesiella_OTU#606                        | 0 | 0 | 0 | 0 | 0 | 0 | 0 | 0 | 0 | 0 | 0 | 1 | 0 | 2 | 0 | 0 | 0 | 0 | 0 | 0 |
| Paludibacter_OTU#607                       | 0 | 0 | 0 | 0 | 0 | 0 | 0 | 0 | 0 | 0 | 0 | 0 | 0 | 1 | 0 | 0 | 0 | 0 | 0 | 0 |
| Barnesiella_OTU#608                        | 0 | 0 | 0 | 0 | 0 | 0 | 0 | 0 | 0 | 0 | 0 | 1 | 0 | 1 | 0 | 0 | 0 | 0 | 0 | 0 |
| Barnesiella_OTU#609                        | 0 | 0 | 0 | 0 | 0 | 0 | 0 | 0 | 0 | 0 | 0 | 0 | 0 | 1 | 0 | 0 | 0 | 0 | 0 | 0 |
| Bulleidia_OTU#610                          | 0 | 0 | 0 | 0 | 0 | 0 | 0 | 0 | 0 | 0 | 0 | 0 | 1 | 1 | 0 | 0 | 0 | 0 | 0 | 0 |
| Paludibacter_OTU#611                       | 0 | 0 | 0 | 0 | 0 | 0 | 0 | 0 | 0 | 0 | 0 | 0 | 0 | 1 | 0 | 0 | 0 | 0 | 0 | 0 |
| Paludibacter_OTU#612                       | 0 | 0 | 0 | 0 | 0 | 0 | 0 | 0 | 0 | 0 | 0 | 0 | 0 | 1 | 0 | 0 | 0 | 0 | 0 | 0 |
| Rikenella_OTU#613                          | 0 | 0 | 0 | 0 | 0 | 0 | 0 | 0 | 0 | 0 | 0 | 0 | 0 | 1 | 0 | 0 | 0 | 0 | 0 | 0 |
| Barnesiella_OTU#614                        | 0 | 0 | 0 | 0 | 0 | 0 | 0 | 0 | 0 | 0 | 0 | 0 | 0 | 1 | 0 | 0 | 0 | 0 | 0 | 0 |
| Paludibacter_OTU#615                       | 0 | 0 | 0 | 0 | 0 | 0 | 0 | 0 | 0 | 0 | 0 | 0 | 0 | 1 | 0 | 0 | 0 | 0 | 0 | 1 |
| Anaerophaga_OTU#616                        | 0 | 0 | 0 | 0 | 0 | 0 | 0 | 0 | 0 | 0 | 0 | 0 | 0 | 1 | 0 | 0 | 0 | 0 | 0 | 0 |

Supplementary Table 1

|                                    |   |   |   |   |   |   |   |   |   |   |   |   |   |   |   |   |   |   |   |
|------------------------------------|---|---|---|---|---|---|---|---|---|---|---|---|---|---|---|---|---|---|---|
| Tannerella_OTU#617                 | 0 | 0 | 0 | 0 | 0 | 0 | 0 | 0 | 0 | 0 | 0 | 0 | 0 | 1 | 0 | 0 | 0 | 0 | 0 |
| Rikenella_OTU#618                  | 0 | 0 | 0 | 0 | 0 | 0 | 0 | 0 | 0 | 0 | 0 | 0 | 0 | 1 | 0 | 0 | 0 | 0 | 0 |
| Paludibacter_OTU#619               | 0 | 0 | 0 | 0 | 0 | 0 | 0 | 0 | 0 | 0 | 0 | 0 | 0 | 1 | 1 | 0 | 0 | 0 | 0 |
| Barnesiella_OTU#620                | 0 | 0 | 0 | 0 | 0 | 0 | 0 | 0 | 0 | 0 | 0 | 0 | 0 | 1 | 0 | 0 | 0 | 0 | 0 |
| Barnesiella_OTU#621                | 0 | 0 | 0 | 0 | 0 | 0 | 0 | 0 | 0 | 0 | 0 | 0 | 0 | 1 | 0 | 0 | 0 | 0 | 0 |
| Paludibacter_OTU#622               | 0 | 0 | 0 | 0 | 0 | 0 | 0 | 0 | 0 | 0 | 0 | 0 | 0 | 1 | 0 | 0 | 0 | 0 | 0 |
| Barnesiella_OTU#623                | 0 | 0 | 0 | 0 | 0 | 0 | 0 | 0 | 0 | 0 | 0 | 0 | 0 | 2 | 0 | 0 | 0 | 0 | 0 |
| Paludibacter_OTU#624               | 0 | 0 | 0 | 0 | 0 | 0 | 0 | 0 | 0 | 0 | 0 | 1 | 0 | 1 | 0 | 0 | 0 | 0 | 0 |
| Paludibacter_OTU#625               | 0 | 0 | 0 | 0 | 0 | 0 | 0 | 0 | 0 | 0 | 0 | 0 | 0 | 1 | 0 | 0 | 0 | 0 | 0 |
| Paludibacter_OTU#626               | 0 | 0 | 0 | 0 | 0 | 0 | 0 | 0 | 0 | 0 | 0 | 0 | 0 | 1 | 0 | 0 | 0 | 0 | 0 |
| Paludibacter_OTU#627               | 0 | 0 | 0 | 0 | 0 | 0 | 0 | 0 | 0 | 0 | 0 | 0 | 0 | 1 | 0 | 0 | 0 | 0 | 0 |
| Barnesiella_OTU#628                | 0 | 0 | 0 | 0 | 0 | 0 | 0 | 0 | 0 | 0 | 0 | 0 | 1 | 1 | 0 | 0 | 0 | 0 | 0 |
| Paludibacter_OTU#629               | 0 | 0 | 0 | 0 | 0 | 0 | 0 | 0 | 0 | 0 | 0 | 0 | 0 | 1 | 0 | 0 | 0 | 0 | 0 |
| Paludibacter_OTU#630               | 0 | 0 | 0 | 0 | 0 | 0 | 0 | 0 | 0 | 0 | 0 | 0 | 0 | 1 | 0 | 0 | 0 | 0 | 0 |
| Peptococcus_OTU#631                | 0 | 0 | 0 | 0 | 0 | 0 | 0 | 0 | 0 | 0 | 0 | 0 | 0 | 1 | 0 | 0 | 0 | 0 | 0 |
| Anaerophaga_OTU#632                | 0 | 0 | 0 | 0 | 0 | 0 | 0 | 0 | 0 | 0 | 0 | 0 | 0 | 1 | 0 | 0 | 0 | 0 | 0 |
| unclassified_OTU#633               | 0 | 1 | 0 | 0 | 0 | 0 | 0 | 0 | 0 | 0 | 0 | 0 | 0 | 1 | 0 | 0 | 0 | 0 | 0 |
| Paludibacter_OTU#634               | 0 | 0 | 0 | 0 | 0 | 0 | 0 | 0 | 0 | 0 | 0 | 0 | 0 | 1 | 0 | 0 | 0 | 0 | 0 |
| Unclassified Bacteroidetes_OTU#635 | 0 | 0 | 0 | 0 | 0 | 0 | 0 | 0 | 0 | 0 | 0 | 0 | 0 | 1 | 1 | 0 | 0 | 0 | 0 |
| Paludibacter_OTU#636               | 0 | 0 | 0 | 0 | 0 | 0 | 0 | 0 | 0 | 0 | 2 | 0 | 0 | 1 | 0 | 0 | 0 | 0 | 0 |
| Anaerophaga_OTU#637                | 0 | 0 | 0 | 0 | 0 | 0 | 0 | 0 | 0 | 0 | 0 | 1 | 1 | 1 | 0 | 0 | 0 | 0 | 0 |
| Allobaculum_OTU#638                | 0 | 0 | 0 | 0 | 0 | 0 | 0 | 0 | 0 | 0 | 0 | 0 | 0 | 1 | 0 | 0 | 0 | 0 | 0 |
| Tuberibacillus_OTU#639             | 0 | 0 | 0 | 0 | 0 | 0 | 0 | 0 | 0 | 0 | 0 | 0 | 0 | 1 | 0 | 0 | 0 | 0 | 0 |
| Paludibacter_OTU#640               | 0 | 0 | 0 | 0 | 0 | 0 | 0 | 0 | 0 | 0 | 0 | 0 | 0 | 1 | 0 | 0 | 0 | 0 | 0 |
| Rikenella_OTU#641                  | 0 | 0 | 0 | 0 | 0 | 0 | 0 | 0 | 0 | 0 | 0 | 0 | 0 | 1 | 0 | 0 | 0 | 0 | 0 |
| Paludibacter_OTU#642               | 0 | 0 | 0 | 0 | 0 | 0 | 0 | 0 | 0 | 0 | 0 | 0 | 0 | 3 | 0 | 0 | 0 | 0 | 0 |
| Anaerophaga_OTU#643                | 0 | 0 | 0 | 0 | 0 | 0 | 0 | 0 | 0 | 0 | 0 | 0 | 0 | 1 | 0 | 0 | 0 | 0 | 0 |
| Allobaculum_OTU#644                | 0 | 0 | 0 | 0 | 0 | 0 | 0 | 0 | 0 | 0 | 0 | 0 | 0 | 1 | 0 | 0 | 0 | 0 | 0 |
| Paludibacter_OTU#645               | 0 | 0 | 0 | 0 | 0 | 0 | 0 | 0 | 0 | 0 | 0 | 0 | 0 | 1 | 0 | 0 | 0 | 0 | 0 |
| Barnesiella_OTU#646                | 0 | 0 | 0 | 0 | 0 | 0 | 0 | 0 | 0 | 0 | 0 | 0 | 0 | 1 | 0 | 0 | 0 | 0 | 0 |
| Paludibacter_OTU#647               | 0 | 0 | 0 | 0 | 0 | 0 | 0 | 0 | 0 | 0 | 0 | 0 | 0 | 1 | 0 | 0 | 0 | 0 | 0 |
| Rikenella_OTU#648                  | 0 | 0 | 0 | 0 | 0 | 0 | 0 | 0 | 0 | 0 | 0 | 0 | 0 | 1 | 0 | 0 | 0 | 0 | 0 |
| Paludibacter_OTU#649               | 0 | 0 | 0 | 0 | 0 | 0 | 0 | 0 | 0 | 0 | 0 | 0 | 0 | 1 | 1 | 1 | 0 | 0 | 0 |

Supplementary Table 1

|                            |   |   |   |   |   |   |   |   |   |   |   |   |   |   |   |   |   |   |   |   |
|----------------------------|---|---|---|---|---|---|---|---|---|---|---|---|---|---|---|---|---|---|---|---|
| Solobacterium_OTU#650      | 0 | 0 | 0 | 0 | 0 | 0 | 0 | 0 | 0 | 0 | 0 | 0 | 0 | 2 | 0 | 0 | 0 | 0 | 0 | 0 |
| Paludibacter_OTU#651       | 0 | 0 | 0 | 0 | 0 | 0 | 0 | 0 | 0 | 0 | 0 | 0 | 0 | 1 | 0 | 0 | 0 | 0 | 0 | 0 |
| Aminiphilus_OTU#652        | 0 | 0 | 0 | 0 | 0 | 0 | 0 | 0 | 0 | 0 | 0 | 0 | 0 | 1 | 0 | 0 | 0 | 0 | 0 | 0 |
| Paludibacter_OTU#653       | 0 | 0 | 0 | 0 | 0 | 0 | 0 | 0 | 0 | 0 | 0 | 3 | 0 | 3 | 0 | 0 | 0 | 1 | 0 | 0 |
| Paludibacter_OTU#654       | 0 | 0 | 0 | 0 | 0 | 0 | 0 | 0 | 0 | 0 | 0 | 0 | 0 | 1 | 0 | 0 | 0 | 0 | 0 | 0 |
| Rikenella_OTU#655          | 0 | 0 | 0 | 0 | 0 | 0 | 0 | 0 | 0 | 0 | 0 | 0 | 0 | 1 | 0 | 0 | 0 | 0 | 0 | 0 |
| Anaerophaga_OTU#656        | 0 | 0 | 0 | 0 | 0 | 0 | 0 | 0 | 0 | 0 | 0 | 0 | 0 | 1 | 0 | 0 | 0 | 0 | 0 | 0 |
| Paludibacter_OTU#657       | 0 | 0 | 0 | 0 | 0 | 0 | 0 | 0 | 0 | 0 | 0 | 0 | 0 | 2 | 0 | 0 | 0 | 0 | 0 | 0 |
| Rikenella_OTU#658          | 0 | 0 | 0 | 0 | 0 | 0 | 0 | 0 | 0 | 0 | 0 | 5 | 1 | 1 | 2 | 0 | 0 | 0 | 1 | 3 |
| Paludibacter_OTU#659       | 0 | 0 | 0 | 0 | 0 | 0 | 0 | 0 | 0 | 0 | 0 | 0 | 0 | 1 | 0 | 0 | 0 | 0 | 0 | 0 |
| Paludibacter_OTU#660       | 0 | 0 | 0 | 0 | 0 | 0 | 0 | 0 | 0 | 0 | 0 | 0 | 0 | 1 | 0 | 0 | 0 | 0 | 0 | 0 |
| Paludibacter_OTU#661       | 0 | 0 | 0 | 0 | 0 | 0 | 0 | 0 | 0 | 0 | 0 | 0 | 0 | 1 | 0 | 0 | 0 | 0 | 0 | 0 |
| Paludibacter_OTU#662       | 0 | 0 | 0 | 0 | 0 | 0 | 0 | 0 | 0 | 0 | 0 | 0 | 0 | 1 | 0 | 0 | 0 | 0 | 0 | 0 |
| Anaerophaga_OTU#663        | 0 | 0 | 0 | 0 | 0 | 0 | 0 | 0 | 0 | 0 | 0 | 0 | 0 | 1 | 0 | 0 | 0 | 0 | 0 | 0 |
| Barnesiella_OTU#664        | 0 | 1 | 0 | 1 | 0 | 0 | 0 | 0 | 0 | 0 | 0 | 0 | 1 | 1 | 0 | 0 | 0 | 0 | 0 | 0 |
| Paludibacter_OTU#665       | 0 | 0 | 0 | 0 | 0 | 0 | 0 | 0 | 0 | 0 | 0 | 0 | 0 | 1 | 0 | 0 | 0 | 0 | 0 | 0 |
| Unclassified               |   |   |   |   |   |   |   |   |   |   |   |   |   |   |   |   |   |   |   |   |
| Porphyromonadaceae_OTU#666 | 0 | 2 | 0 | 0 | 3 | 0 | 0 | 0 | 0 | 0 | 2 | 0 | 0 | 1 | 0 | 0 | 0 | 0 | 0 | 0 |
| Allobaculum_OTU#667        | 0 | 0 | 0 | 0 | 0 | 0 | 0 | 0 | 0 | 0 | 0 | 0 | 0 | 1 | 0 | 0 | 0 | 0 | 0 | 0 |
| Paludibacter_OTU#668       | 0 | 0 | 0 | 0 | 0 | 0 | 0 | 0 | 0 | 0 | 0 | 0 | 0 | 0 | 1 | 0 | 0 | 0 | 0 | 0 |
| Sporacetigenium_OTU#669    | 0 | 0 | 0 | 0 | 0 | 0 | 0 | 0 | 0 | 0 | 0 | 1 | 0 | 0 | 2 | 1 | 0 | 0 | 0 | 0 |
| Paludibacter_OTU#670       | 0 | 0 | 0 | 0 | 0 | 0 | 0 | 0 | 0 | 0 | 0 | 0 | 0 | 0 | 1 | 0 | 0 | 0 | 0 | 0 |
| Paludibacter_OTU#671       | 0 | 0 | 0 | 0 | 0 | 0 | 0 | 0 | 0 | 0 | 0 | 0 | 1 | 0 | 1 | 0 | 1 | 0 | 0 | 1 |
| Rikenella_OTU#672          | 0 | 0 | 0 | 0 | 0 | 0 | 0 | 0 | 0 | 0 | 0 | 0 | 0 | 0 | 1 | 0 | 0 | 0 | 0 | 0 |
| Paludibacter_OTU#673       | 0 | 0 | 0 | 0 | 0 | 0 | 0 | 0 | 0 | 0 | 0 | 0 | 0 | 0 | 1 | 0 | 0 | 0 | 0 | 0 |
| Limibacter_OTU#674         | 0 | 0 | 0 | 0 | 0 | 0 | 0 | 0 | 0 | 0 | 0 | 0 | 0 | 0 | 1 | 0 | 0 | 0 | 0 | 0 |
| Barnesiella_OTU#675        | 0 | 0 | 0 | 0 | 0 | 0 | 0 | 0 | 0 | 0 | 0 | 0 | 0 | 0 | 1 | 0 | 0 | 0 | 0 | 0 |
| Barnesiella_OTU#676        | 0 | 0 | 0 | 0 | 0 | 0 | 0 | 0 | 0 | 0 | 0 | 0 | 0 | 0 | 1 | 0 | 0 | 0 | 0 | 0 |
| Barnesiella_OTU#677        | 0 | 0 | 0 | 0 | 0 | 0 | 0 | 0 | 0 | 0 | 0 | 0 | 0 | 0 | 1 | 0 | 0 | 0 | 0 | 0 |
| Paludibacter_OTU#678       | 0 | 0 | 0 | 0 | 0 | 0 | 0 | 0 | 0 | 0 | 0 | 0 | 0 | 0 | 1 | 0 | 0 | 0 | 0 | 0 |
| Rikenella_OTU#679          | 0 | 0 | 0 | 0 | 0 | 0 | 0 | 0 | 0 | 0 | 0 | 0 | 0 | 0 | 1 | 0 | 0 | 0 | 0 | 0 |
| Paludibacter_OTU#680       | 0 | 0 | 0 | 0 | 0 | 0 | 0 | 0 | 0 | 0 | 0 | 0 | 0 | 0 | 1 | 0 | 0 | 0 | 0 | 0 |
| Anaerophaga_OTU#681        | 0 | 0 | 0 | 0 | 0 | 0 | 0 | 0 | 0 | 0 | 0 | 0 | 0 | 0 | 1 | 0 | 0 | 0 | 0 | 0 |
| Paludibacter_OTU#682       | 0 | 0 | 0 | 0 | 0 | 0 | 0 | 0 | 0 | 0 | 0 | 0 | 0 | 0 | 1 | 0 | 0 | 0 | 0 | 0 |

Supplementary Table 1

|                               |   |   |   |   |   |   |   |   |   |   |   |   |   |   |   |   |   |   |   |   |
|-------------------------------|---|---|---|---|---|---|---|---|---|---|---|---|---|---|---|---|---|---|---|---|
| Paludibacter_OTU#683          | 0 | 0 | 0 | 0 | 0 | 0 | 0 | 0 | 0 | 0 | 0 | 0 | 0 | 0 | 1 | 0 | 0 | 0 | 0 | 0 |
| Paludibacter_OTU#684          | 0 | 0 | 0 | 0 | 0 | 0 | 0 | 0 | 0 | 0 | 0 | 0 | 0 | 0 | 1 | 0 | 0 | 0 | 0 | 0 |
| Paludibacter_OTU#685          | 0 | 0 | 0 | 0 | 0 | 0 | 0 | 0 | 0 | 0 | 0 | 0 | 1 | 0 | 1 | 0 | 0 | 0 | 0 | 0 |
| Paludibacter_OTU#686          | 0 | 0 | 0 | 0 | 0 | 0 | 0 | 0 | 0 | 0 | 0 | 0 | 0 | 0 | 1 | 0 | 0 | 0 | 0 | 0 |
| Rikenella_OTU#687             | 0 | 0 | 0 | 0 | 1 | 0 | 0 | 0 | 0 | 0 | 0 | 1 | 0 | 2 | 1 | 0 | 0 | 0 | 0 | 0 |
| Allobaculum_OTU#688           | 0 | 0 | 0 | 0 | 0 | 0 | 0 | 0 | 0 | 0 | 0 | 1 | 0 | 0 | 1 | 0 | 0 | 0 | 0 | 0 |
| Barnesiella_OTU#689           | 0 | 0 | 0 | 0 | 0 | 0 | 0 | 0 | 0 | 0 | 0 | 5 | 1 | 2 | 1 | 1 | 0 | 0 | 0 | 0 |
| Barnesiella_OTU#690           | 0 | 0 | 0 | 0 | 0 | 0 | 0 | 0 | 0 | 0 | 0 | 1 | 0 | 1 | 1 | 1 | 0 | 0 | 0 | 0 |
| Paludibacter_OTU#691          | 0 | 0 | 0 | 0 | 0 | 0 | 0 | 0 | 0 | 0 | 0 | 0 | 0 | 0 | 1 | 0 | 0 | 0 | 0 | 0 |
| Barnesiella_OTU#692           | 0 | 0 | 0 | 0 | 0 | 0 | 0 | 0 | 0 | 0 | 0 | 0 | 0 | 0 | 1 | 0 | 0 | 0 | 0 | 0 |
| Paludibacter_OTU#693          | 0 | 0 | 0 | 0 | 0 | 0 | 0 | 0 | 0 | 0 | 0 | 0 | 0 | 0 | 1 | 0 | 0 | 0 | 0 | 0 |
| Paludibacter_OTU#694          | 0 | 0 | 0 | 0 | 0 | 0 | 0 | 0 | 0 | 0 | 0 | 0 | 4 | 0 | 1 | 0 | 0 | 0 | 0 | 0 |
| Limibacter_OTU#695            | 0 | 0 | 0 | 0 | 0 | 0 | 0 | 0 | 0 | 0 | 0 | 0 | 0 | 0 | 1 | 0 | 0 | 0 | 0 | 0 |
| unclassified_OTU#696          | 0 | 0 | 0 | 0 | 0 | 0 | 0 | 0 | 0 | 0 | 0 | 0 | 1 | 0 | 1 | 0 | 0 | 0 | 0 | 0 |
| Barnesiella_OTU#697           | 0 | 1 | 0 | 0 | 0 | 0 | 0 | 0 | 0 | 0 | 0 | 1 | 1 | 1 | 1 | 2 | 0 | 0 | 0 | 0 |
| Denitrobacterium_OTU#698      | 0 | 0 | 0 | 0 | 0 | 0 | 0 | 0 | 0 | 0 | 0 | 0 | 0 | 0 | 1 | 0 | 0 | 0 | 0 | 0 |
| Anaerophaga_OTU#699           | 0 | 0 | 0 | 0 | 0 | 0 | 0 | 0 | 0 | 0 | 0 | 0 | 0 | 0 | 1 | 0 | 0 | 0 | 0 | 0 |
| Limibacter_OTU#700            | 0 | 0 | 0 | 0 | 0 | 0 | 0 | 0 | 0 | 0 | 0 | 0 | 0 | 0 | 1 | 0 | 0 | 0 | 0 | 0 |
| Clostridium_OTU#701           | 0 | 0 | 0 | 0 | 0 | 0 | 0 | 0 | 0 | 0 | 0 | 1 | 0 | 1 | 3 | 1 | 0 | 0 | 0 | 0 |
| Barnesiella_OTU#702           | 0 | 0 | 0 | 0 | 0 | 0 | 0 | 0 | 0 | 0 | 0 | 0 | 0 | 0 | 1 | 0 | 0 | 0 | 0 | 0 |
| Dorea_OTU#703                 | 0 | 0 | 0 | 0 | 0 | 0 | 0 | 0 | 0 | 0 | 0 | 0 | 0 | 0 | 1 | 0 | 0 | 0 | 0 | 0 |
| Paludibacter_OTU#704          | 0 | 0 | 0 | 0 | 0 | 0 | 0 | 0 | 0 | 0 | 0 | 0 | 0 | 0 | 1 | 0 | 0 | 0 | 0 | 0 |
| Paludibacter_OTU#705          | 0 | 0 | 0 | 0 | 0 | 0 | 0 | 0 | 0 | 0 | 0 | 0 | 0 | 0 | 1 | 0 | 0 | 0 | 0 | 0 |
| Paludibacter_OTU#706          | 0 | 0 | 0 | 0 | 0 | 0 | 0 | 0 | 0 | 0 | 0 | 0 | 0 | 0 | 1 | 0 | 0 | 0 | 0 | 0 |
| Paludibacter_OTU#707          | 0 | 1 | 0 | 0 | 1 | 0 | 0 | 0 | 0 | 0 | 0 | 1 | 2 | 1 | 2 | 0 | 0 | 0 | 0 | 0 |
| Salinhabitans_OTU#708         | 0 | 0 | 0 | 0 | 0 | 0 | 0 | 0 | 0 | 0 | 0 | 4 | 3 | 1 | 1 | 5 | 1 | 0 | 0 | 0 |
| Limibacter_OTU#709            | 0 | 0 | 1 | 0 | 0 | 0 | 0 | 0 | 0 | 0 | 0 | 1 | 1 | 0 | 2 | 0 | 0 | 0 | 0 | 0 |
| Barnesiella_OTU#710           | 0 | 0 | 0 | 0 | 0 | 0 | 0 | 0 | 0 | 0 | 0 | 0 | 0 | 0 | 1 | 0 | 0 | 0 | 0 | 0 |
| Unclassified Bacteria_OTU#711 | 0 | 0 | 0 | 0 | 0 | 0 | 0 | 0 | 0 | 0 | 0 | 1 | 0 | 0 | 1 | 0 | 0 | 0 | 0 | 0 |
| Paludibacter_OTU#712          | 0 | 1 | 0 | 0 | 0 | 0 | 0 | 0 | 0 | 0 | 0 | 0 | 4 | 0 | 1 | 0 | 0 | 0 | 0 | 0 |
| Barnesiella_OTU#713           | 0 | 0 | 0 | 1 | 0 | 0 | 0 | 0 | 0 | 0 | 0 | 0 | 0 | 0 | 1 | 0 | 0 | 0 | 0 | 0 |
| Proteiniphilum_OTU#714        | 0 | 0 | 0 | 0 | 0 | 0 | 0 | 0 | 0 | 0 | 0 | 0 | 0 | 0 | 1 | 0 | 0 | 0 | 0 | 0 |
| Barnesiella_OTU#715           | 0 | 0 | 0 | 0 | 0 | 0 | 0 | 0 | 0 | 0 | 0 | 0 | 0 | 0 | 1 | 0 | 0 | 0 | 0 | 0 |

Supplementary Table 1

|                                    |   |   |   |   |   |   |   |   |   |   |   |   |   |   |   |   |   |   |   |   |
|------------------------------------|---|---|---|---|---|---|---|---|---|---|---|---|---|---|---|---|---|---|---|---|
| Paludibacter_OTU#716               | 0 | 0 | 0 | 0 | 0 | 0 | 0 | 0 | 0 | 0 | 0 | 0 | 0 | 0 | 1 | 0 | 0 | 0 | 0 | 0 |
| Paludibacter_OTU#717               | 0 | 0 | 0 | 0 | 0 | 0 | 0 | 0 | 0 | 0 | 0 | 0 | 0 | 0 | 1 | 0 | 0 | 0 | 0 | 0 |
| Dorea_OTU#718                      | 0 | 0 | 0 | 0 | 0 | 0 | 0 | 0 | 0 | 0 | 0 | 0 | 0 | 0 | 1 | 0 | 0 | 0 | 0 | 0 |
| Paludibacter_OTU#719               | 0 | 0 | 0 | 0 | 0 | 0 | 0 | 0 | 0 | 0 | 0 | 0 | 0 | 0 | 1 | 0 | 0 | 0 | 0 | 0 |
| Paludibacter_OTU#720               | 0 | 0 | 0 | 0 | 0 | 0 | 0 | 0 | 0 | 0 | 0 | 0 | 0 | 0 | 1 | 0 | 0 | 0 | 0 | 0 |
| Paludibacter_OTU#721               | 0 | 0 | 0 | 0 | 0 | 0 | 0 | 0 | 0 | 0 | 0 | 0 | 1 | 0 | 2 | 1 | 0 | 0 | 0 | 0 |
| Anaerophaga_OTU#722                | 0 | 0 | 0 | 0 | 0 | 0 | 0 | 0 | 0 | 0 | 0 | 1 | 0 | 1 | 1 | 0 | 0 | 0 | 0 | 0 |
| Paludibacter_OTU#723               | 0 | 0 | 0 | 0 | 0 | 0 | 0 | 0 | 0 | 0 | 0 | 0 | 1 | 0 | 1 | 0 | 0 | 0 | 0 | 0 |
| Paludibacter_OTU#724               | 0 | 0 | 0 | 0 | 0 | 0 | 0 | 0 | 0 | 0 | 0 | 0 | 0 | 0 | 1 | 0 | 0 | 0 | 0 | 0 |
| Paludibacter_OTU#725               | 0 | 0 | 0 | 0 | 0 | 0 | 0 | 0 | 0 | 0 | 0 | 1 | 3 | 0 | 1 | 0 | 0 | 0 | 0 | 0 |
| Paludibacter_OTU#726               | 0 | 0 | 0 | 0 | 0 | 0 | 0 | 0 | 0 | 0 | 0 | 0 | 0 | 0 | 1 | 0 | 0 | 0 | 0 | 0 |
| Paludibacter_OTU#727               | 0 | 0 | 0 | 0 | 0 | 0 | 0 | 0 | 0 | 0 | 0 | 0 | 0 | 0 | 1 | 0 | 0 | 0 | 0 | 0 |
| Alistipes_OTU#728                  | 0 | 0 | 0 | 0 | 0 | 0 | 0 | 0 | 0 | 0 | 0 | 0 | 0 | 0 | 1 | 0 | 0 | 0 | 0 | 0 |
| Barnesiella_OTU#729                | 0 | 0 | 0 | 0 | 0 | 0 | 0 | 0 | 0 | 0 | 0 | 0 | 0 | 0 | 1 | 0 | 0 | 0 | 0 | 0 |
| Unclassified Bacteroidales_OTU#730 | 0 | 0 | 0 | 0 | 0 | 0 | 0 | 0 | 0 | 0 | 0 | 0 | 0 | 0 | 2 | 0 | 0 | 0 | 0 | 0 |
| Paludibacter_OTU#731               | 0 | 0 | 0 | 0 | 0 | 0 | 0 | 0 | 0 | 0 | 0 | 0 | 0 | 0 | 1 | 0 | 0 | 0 | 0 | 0 |
| Anaerophaga_OTU#732                | 0 | 0 | 0 | 0 | 0 | 0 | 0 | 0 | 0 | 0 | 0 | 0 | 1 | 0 | 4 | 0 | 0 | 0 | 0 | 0 |
| Paludibacter_OTU#733               | 0 | 0 | 0 | 0 | 0 | 0 | 0 | 0 | 0 | 0 | 0 | 0 | 0 | 0 | 1 | 0 | 0 | 0 | 0 | 0 |
| Paludibacter_OTU#734               | 0 | 0 | 0 | 0 | 0 | 0 | 1 | 7 | 0 | 0 | 0 | 5 | 5 | 1 | 4 | 1 | 1 | 2 | 3 | 0 |
| Paludibacter_OTU#735               | 1 | 0 | 0 | 2 | 1 | 0 | 0 | 0 | 0 | 0 | 0 | 2 | 2 | 0 | 2 | 0 | 0 | 0 | 0 | 0 |
| Paludibacter_OTU#736               | 0 | 0 | 0 | 0 | 0 | 0 | 0 | 0 | 0 | 0 | 0 | 0 | 0 | 1 | 2 | 0 | 0 | 0 | 0 | 0 |
| Paludibacter_OTU#737               | 0 | 0 | 0 | 0 | 0 | 0 | 0 | 0 | 0 | 0 | 0 | 0 | 0 | 0 | 1 | 0 | 0 | 0 | 0 | 0 |
| Unclassified Bacteroidales_OTU#738 | 0 | 0 | 0 | 0 | 0 | 0 | 0 | 0 | 0 | 0 | 0 | 0 | 0 | 2 | 1 | 1 | 0 | 0 | 0 | 0 |
| Limibacter_OTU#739                 | 0 | 0 | 0 | 0 | 0 | 0 | 0 | 0 | 0 | 0 | 0 | 0 | 0 | 0 | 1 | 0 | 0 | 0 | 0 | 0 |
| Paludibacter_OTU#740               | 0 | 0 | 0 | 0 | 0 | 0 | 0 | 0 | 0 | 0 | 0 | 0 | 0 | 1 | 1 | 1 | 0 | 0 | 0 | 0 |
| Barnesiella_OTU#741                | 0 | 0 | 0 | 0 | 0 | 0 | 0 | 0 | 0 | 0 | 0 | 0 | 0 | 0 | 2 | 0 | 0 | 0 | 0 | 0 |
| Rikenella_OTU#742                  | 0 | 0 | 1 | 0 | 1 | 0 | 0 | 0 | 0 | 0 | 0 | 0 | 0 | 0 | 1 | 0 | 0 | 0 | 0 | 0 |
| Pseudozobellia_OTU#743             | 0 | 0 | 0 | 0 | 0 | 0 | 0 | 0 | 0 | 0 | 0 | 0 | 0 | 0 | 1 | 0 | 0 | 0 | 0 | 0 |
| Barnesiella_OTU#744                | 0 | 0 | 0 | 0 | 0 | 0 | 0 | 0 | 0 | 0 | 0 | 0 | 0 | 0 | 1 | 0 | 0 | 0 | 0 | 0 |
| Barnesiella_OTU#745                | 0 | 0 | 0 | 0 | 0 | 0 | 0 | 0 | 0 | 0 | 0 | 0 | 0 | 0 | 1 | 0 | 0 | 0 | 0 | 0 |
| Paludibacter_OTU#746               | 0 | 0 | 0 | 0 | 0 | 0 | 0 | 0 | 0 | 0 | 0 | 1 | 0 | 0 | 1 | 0 | 0 | 0 | 0 | 0 |
| Paludibacter_OTU#747               | 0 | 0 | 0 | 0 | 0 | 0 | 0 | 0 | 0 | 0 | 0 | 0 | 0 | 0 | 1 | 0 | 0 | 0 | 0 | 0 |
| Barnesiella_OTU#748                | 0 | 0 | 0 | 1 | 0 | 0 | 0 | 0 | 0 | 0 | 0 | 0 | 0 | 0 | 3 | 0 | 0 | 0 | 0 | 0 |

Supplementary Table 1

|                                    |   |   |   |   |   |   |   |   |   |   |   |   |   |   |   |   |   |   |   |   |   |
|------------------------------------|---|---|---|---|---|---|---|---|---|---|---|---|---|---|---|---|---|---|---|---|---|
| Paludibacter_OTU#749               | 0 | 0 | 0 | 0 | 0 | 0 | 0 | 0 | 0 | 0 | 0 | 0 | 0 | 0 | 0 | 1 | 0 | 0 | 0 | 0 | 0 |
| Barnesiella_OTU#750                | 0 | 0 | 0 | 0 | 0 | 0 | 0 | 0 | 0 | 0 | 0 | 0 | 0 | 0 | 0 | 0 | 1 | 0 | 0 | 0 | 0 |
| Barnesiella_OTU#751                | 0 | 0 | 0 | 0 | 0 | 0 | 0 | 0 | 0 | 0 | 0 | 2 | 0 | 0 | 0 | 1 | 0 | 0 | 0 | 0 | 0 |
| Paludibacter_OTU#752               | 0 | 0 | 0 | 0 | 0 | 0 | 0 | 0 | 0 | 0 | 0 | 0 | 0 | 0 | 0 | 1 | 0 | 0 | 0 | 0 | 0 |
| Allobaculum_OTU#753                | 0 | 0 | 0 | 0 | 0 | 0 | 0 | 0 | 0 | 0 | 0 | 4 | 0 | 2 | 1 | 2 | 0 | 0 | 0 | 0 | 0 |
| Turicibacter_OTU#754               | 0 | 0 | 0 | 0 | 0 | 0 | 0 | 0 | 0 | 0 | 0 | 0 | 0 | 0 | 0 | 1 | 0 | 0 | 0 | 0 | 0 |
| Paludibacter_OTU#755               | 0 | 0 | 0 | 0 | 0 | 0 | 0 | 0 | 0 | 0 | 0 | 0 | 0 | 0 | 0 | 1 | 0 | 0 | 0 | 0 | 0 |
| Barnesiella_OTU#756                | 0 | 0 | 0 | 0 | 0 | 0 | 0 | 0 | 0 | 0 | 0 | 0 | 0 | 0 | 0 | 1 | 0 | 0 | 0 | 0 | 0 |
| Barnesiella_OTU#757                | 0 | 0 | 0 | 0 | 0 | 0 | 0 | 0 | 0 | 0 | 0 | 0 | 0 | 0 | 0 | 1 | 0 | 0 | 0 | 0 | 0 |
| Allobaculum_OTU#758                | 0 | 0 | 0 | 0 | 0 | 0 | 0 | 0 | 0 | 0 | 0 | 1 | 0 | 3 | 1 | 3 | 0 | 0 | 0 | 0 | 0 |
| Paludibacter_OTU#759               | 0 | 0 | 0 | 0 | 0 | 0 | 0 | 0 | 0 | 0 | 0 | 0 | 0 | 0 | 0 | 1 | 0 | 0 | 0 | 0 | 0 |
| Limibacter_OTU#760                 | 0 | 0 | 0 | 0 | 0 | 0 | 0 | 0 | 0 | 0 | 0 | 0 | 0 | 0 | 0 | 1 | 0 | 0 | 0 | 0 | 0 |
| Paludibacter_OTU#761               | 0 | 0 | 0 | 0 | 0 | 0 | 0 | 0 | 0 | 0 | 0 | 0 | 0 | 0 | 0 | 1 | 0 | 0 | 0 | 0 | 0 |
| Paludibacter_OTU#762               | 0 | 0 | 0 | 0 | 0 | 0 | 0 | 0 | 0 | 0 | 0 | 0 | 0 | 0 | 0 | 1 | 0 | 0 | 0 | 0 | 0 |
| Barnesiella_OTU#763                | 0 | 0 | 0 | 0 | 0 | 0 | 0 | 0 | 0 | 0 | 0 | 0 | 0 | 0 | 0 | 1 | 0 | 0 | 0 | 0 | 0 |
| Rikenella_OTU#764                  | 0 | 0 | 0 | 0 | 0 | 0 | 0 | 0 | 0 | 0 | 0 | 0 | 0 | 0 | 0 | 1 | 0 | 0 | 0 | 0 | 0 |
| Denitrobacterium_OTU#765           | 0 | 0 | 0 | 0 | 0 | 0 | 0 | 0 | 0 | 0 | 0 | 1 | 0 | 0 | 0 | 1 | 0 | 0 | 0 | 0 | 0 |
| Allobaculum_OTU#766                | 0 | 0 | 0 | 0 | 0 | 0 | 0 | 0 | 0 | 0 | 0 | 2 | 2 | 1 | 0 | 2 | 0 | 0 | 0 | 0 | 0 |
| Paludibacter_OTU#767               | 0 | 1 | 0 | 0 | 1 | 0 | 0 | 0 | 0 | 0 | 0 | 0 | 0 | 3 | 0 | 1 | 0 | 0 | 0 | 0 | 0 |
| Rikenella_OTU#768                  | 0 | 0 | 0 | 0 | 0 | 0 | 0 | 0 | 0 | 0 | 0 | 0 | 0 | 0 | 0 | 1 | 0 | 0 | 0 | 0 | 0 |
| Rikenella_OTU#769                  | 0 | 0 | 0 | 0 | 0 | 0 | 0 | 0 | 0 | 0 | 0 | 0 | 0 | 0 | 0 | 1 | 0 | 0 | 0 | 0 | 0 |
| Rikenella_OTU#770                  | 0 | 0 | 0 | 0 | 0 | 0 | 0 | 0 | 0 | 0 | 0 | 0 | 0 | 0 | 0 | 1 | 0 | 0 | 0 | 0 | 0 |
| Paludibacter_OTU#771               | 0 | 0 | 0 | 0 | 0 | 0 | 0 | 0 | 0 | 0 | 0 | 0 | 0 | 0 | 0 | 1 | 0 | 0 | 0 | 0 | 0 |
| Paludibacter_OTU#772               | 0 | 0 | 0 | 0 | 0 | 0 | 0 | 0 | 0 | 0 | 0 | 1 | 0 | 1 | 1 | 1 | 0 | 0 | 0 | 0 | 0 |
| Paludibacter_OTU#773               | 0 | 1 | 0 | 0 | 0 | 0 | 0 | 0 | 0 | 0 | 0 | 1 | 1 | 1 | 1 | 1 | 0 | 0 | 0 | 0 | 0 |
| Unclassified Bacteroidales_OTU#774 | 1 | 0 | 0 | 0 | 1 | 0 | 0 | 0 | 0 | 0 | 0 | 0 | 1 | 0 | 0 | 1 | 0 | 0 | 0 | 0 | 0 |
| Limibacter_OTU#775                 | 0 | 0 | 0 | 0 | 0 | 0 | 0 | 0 | 0 | 0 | 0 | 0 | 0 | 0 | 0 | 1 | 0 | 0 | 0 | 0 | 0 |
| Unclassified Bacteroidetes_OTU#776 | 0 | 0 | 0 | 0 | 0 | 0 | 0 | 0 | 0 | 0 | 0 | 1 | 1 | 0 | 1 | 1 | 0 | 0 | 0 | 0 | 0 |
| Butyrlicimonas_OTU#777             | 0 | 0 | 0 | 0 | 0 | 0 | 0 | 0 | 0 | 0 | 0 | 0 | 0 | 0 | 0 | 1 | 0 | 0 | 0 | 0 | 0 |
| Barnesiella_OTU#778                | 0 | 0 | 0 | 0 | 0 | 0 | 0 | 0 | 0 | 0 | 0 | 0 | 0 | 0 | 0 | 1 | 0 | 0 | 0 | 0 | 0 |
| Barnesiella_OTU#779                | 0 | 0 | 0 | 0 | 0 | 0 | 0 | 0 | 0 | 0 | 0 | 0 | 0 | 0 | 0 | 1 | 0 | 0 | 0 | 0 | 0 |
| Hallella_OTU#780                   | 0 | 0 | 0 | 0 | 0 | 0 | 0 | 0 | 0 | 0 | 0 | 0 | 0 | 0 | 0 | 1 | 0 | 0 | 0 | 0 | 0 |
| Paludibacter_OTU#781               | 0 | 0 | 0 | 0 | 0 | 0 | 0 | 0 | 0 | 0 | 0 | 0 | 0 | 0 | 0 | 1 | 0 | 0 | 0 | 0 | 0 |

Supplementary Table 1



|                               |   |   |   |   |   |   |   |   |   |   |   |    |    |   |    |   |   |   |   |   |
|-------------------------------|---|---|---|---|---|---|---|---|---|---|---|----|----|---|----|---|---|---|---|---|
| Paludibacter_OTU#782          | 0 | 0 | 0 | 0 | 0 | 0 | 0 | 0 | 0 | 0 | 0 | 0  | 0  | 0 | 0  | 1 | 0 | 0 | 0 | 0 |
| Paludibacter_OTU#783          | 0 | 0 | 0 | 0 | 0 | 0 | 0 | 0 | 0 | 0 | 0 | 0  | 0  | 0 | 0  | 1 | 1 | 0 | 0 | 0 |
| Denitrobacterium_OTU#784      | 0 | 0 | 0 | 0 | 0 | 0 | 0 | 0 | 0 | 0 | 0 | 0  | 0  | 0 | 0  | 1 | 0 | 0 | 0 | 0 |
| Paludibacter_OTU#785          | 0 | 0 | 0 | 0 | 0 | 0 | 0 | 0 | 0 | 0 | 0 | 0  | 0  | 0 | 0  | 1 | 0 | 0 | 0 | 0 |
| Butyricimonas_OTU#786         | 0 | 0 | 0 | 0 | 0 | 0 | 0 | 0 | 0 | 0 | 0 | 0  | 0  | 1 | 0  | 1 | 0 | 0 | 0 | 0 |
| Paludibacter_OTU#787          | 0 | 0 | 0 | 0 | 0 | 0 | 0 | 0 | 0 | 0 | 0 | 0  | 0  | 0 | 0  | 1 | 0 | 0 | 0 | 0 |
| Rikenella_OTU#788             | 0 | 0 | 0 | 0 | 0 | 0 | 0 | 0 | 0 | 0 | 0 | 0  | 0  | 0 | 0  | 1 | 0 | 0 | 0 | 0 |
| Allobaculum_OTU#789           | 0 | 0 | 0 | 0 | 0 | 0 | 0 | 0 | 0 | 0 | 4 | 1  | 1  | 1 | 2  | 0 | 0 | 0 | 0 | 0 |
| Paludibacter_OTU#790          | 0 | 0 | 0 | 0 | 0 | 0 | 0 | 0 | 0 | 0 | 0 | 0  | 1  | 0 | 0  | 1 | 0 | 0 | 0 | 0 |
| Paludibacter_OTU#791          | 0 | 0 | 0 | 0 | 0 | 0 | 0 | 0 | 0 | 0 | 0 | 0  | 0  | 0 | 0  | 1 | 0 | 0 | 0 | 0 |
| Barnesiella_OTU#792           | 0 | 0 | 0 | 0 | 0 | 0 | 0 | 0 | 0 | 0 | 0 | 0  | 0  | 0 | 0  | 1 | 0 | 0 | 0 | 0 |
| Allobaculum_OTU#793           | 0 | 0 | 0 | 0 | 0 | 0 | 0 | 0 | 0 | 0 | 0 | 0  | 0  | 0 | 0  | 1 | 0 | 0 | 0 | 0 |
| Paludibacter_OTU#794          | 0 | 0 | 0 | 0 | 0 | 0 | 0 | 0 | 0 | 0 | 0 | 0  | 0  | 0 | 0  | 1 | 0 | 0 | 0 | 0 |
| Barnesiella_OTU#795           | 0 | 0 | 0 | 0 | 0 | 0 | 0 | 0 | 0 | 0 | 0 | 0  | 0  | 0 | 0  | 1 | 0 | 0 | 0 | 0 |
| Paludibacter_OTU#796          | 0 | 0 | 0 | 0 | 0 | 0 | 0 | 0 | 0 | 0 | 0 | 0  | 0  | 0 | 0  | 1 | 0 | 0 | 0 | 0 |
| Prevotella_OTU#797            | 0 | 0 | 0 | 0 | 0 | 0 | 0 | 0 | 0 | 0 | 0 | 1  | 0  | 0 | 0  | 1 | 0 | 0 | 0 | 0 |
| Paludibacter_OTU#798          | 0 | 0 | 0 | 0 | 0 | 0 | 0 | 0 | 0 | 0 | 0 | 0  | 0  | 0 | 1  | 1 | 0 | 0 | 0 | 0 |
| Paludibacter_OTU#799          | 1 | 4 | 0 | 1 | 1 | 0 | 0 | 1 | 0 | 0 | 0 | 0  | 0  | 1 | 1  | 3 | 0 | 0 | 0 | 0 |
| Barnesiella_OTU#800           | 0 | 0 | 0 | 0 | 0 | 0 | 0 | 0 | 0 | 0 | 0 | 0  | 0  | 0 | 0  | 1 | 0 | 0 | 0 | 0 |
| Paludibacter_OTU#801          | 0 | 0 | 0 | 0 | 0 | 0 | 0 | 0 | 0 | 0 | 0 | 0  | 0  | 0 | 0  | 1 | 0 | 0 | 0 | 0 |
| Barnesiella_OTU#802           | 1 | 1 | 0 | 1 | 0 | 0 | 1 | 1 | 0 | 0 | 0 | 16 | 18 | 7 | 15 | 4 | 2 | 0 | 0 | 0 |
| Unclassified Bacteria_OTU#803 | 0 | 0 | 0 | 0 | 0 | 0 | 0 | 0 | 0 | 0 | 0 | 1  | 0  | 0 | 0  | 1 | 0 | 0 | 0 | 0 |
| Barnesiella_OTU#804           | 0 | 0 | 0 | 1 | 0 | 0 | 0 | 0 | 0 | 0 | 0 | 0  | 0  | 2 | 0  | 1 | 0 | 0 | 0 | 0 |
| Paraprevotella_OTU#805        | 0 | 0 | 0 | 0 | 0 | 0 | 0 | 0 | 0 | 0 | 0 | 0  | 0  | 0 | 0  | 1 | 0 | 0 | 0 | 0 |
| Barnesiella_OTU#806           | 0 | 1 | 0 | 0 | 0 | 0 | 0 | 0 | 0 | 0 | 0 | 1  | 0  | 1 | 0  | 2 | 0 | 0 | 0 | 0 |
| Paludibacter_OTU#807          | 0 | 0 | 0 | 0 | 0 | 0 | 0 | 0 | 0 | 0 | 0 | 0  | 0  | 0 | 0  | 1 | 0 | 0 | 0 | 0 |
| Paludibacter_OTU#808          | 0 | 1 | 0 | 0 | 0 | 0 | 0 | 0 | 0 | 0 | 0 | 1  | 1  | 0 | 0  | 2 | 0 | 0 | 0 | 0 |
| Alistipes_OTU#809             | 0 | 0 | 0 | 0 | 0 | 0 | 0 | 0 | 0 | 0 | 0 | 0  | 0  | 0 | 0  | 1 | 0 | 0 | 0 | 0 |
| Barnesiella_OTU#810           | 0 | 0 | 0 | 0 | 0 | 0 | 0 | 0 | 0 | 0 | 0 | 0  | 0  | 0 | 0  | 1 | 0 | 0 | 0 | 0 |
| Oscillibacter_OTU#811         | 0 | 0 | 0 | 0 | 0 | 0 | 0 | 0 | 0 | 0 | 0 | 0  | 0  | 0 | 0  | 1 | 0 | 0 | 0 | 0 |
| Limibacter_OTU#812            | 0 | 0 | 0 | 0 | 0 | 0 | 0 | 0 | 0 | 0 | 0 | 0  | 0  | 0 | 0  | 1 | 0 | 0 | 0 | 0 |
| Anaerophaga_OTU#813           | 0 | 0 | 0 | 0 | 0 | 0 | 0 | 0 | 0 | 0 | 0 | 0  | 0  | 0 | 1  | 1 | 0 | 0 | 0 | 1 |
| Paludibacter_OTU#814          | 0 | 0 | 0 | 0 | 0 | 0 | 0 | 0 | 0 | 0 | 0 | 0  | 0  | 0 | 0  | 1 | 0 | 0 | 0 | 0 |

Supplementary Table 1

|                                         |   |   |   |   |   |   |   |   |   |   |   |    |    |    |    |    |   |   |   |   |
|-----------------------------------------|---|---|---|---|---|---|---|---|---|---|---|----|----|----|----|----|---|---|---|---|
| Paludibacter_OTU#815                    | 3 | 2 | 0 | 5 | 2 | 0 | 0 | 0 | 0 | 0 | 0 | 1  | 7  | 1  | 3  | 2  | 0 | 0 | 0 | 0 |
| Barnesiella_OTU#816                     | 0 | 0 | 0 | 0 | 1 | 0 | 0 | 0 | 0 | 0 | 0 | 1  | 0  | 0  | 0  | 1  | 0 | 1 | 0 | 0 |
| Barnesiella_OTU#817                     | 0 | 0 | 0 | 0 | 0 | 0 | 0 | 0 | 0 | 0 | 0 | 0  | 0  | 0  | 0  | 1  | 0 | 0 | 0 | 0 |
| Paludibacter_OTU#818                    | 0 | 0 | 0 | 0 | 0 | 0 | 0 | 0 | 0 | 0 | 0 | 0  | 0  | 0  | 0  | 1  | 0 | 0 | 0 | 0 |
| Unclassified Bacteroidales_OTU#819      | 0 | 0 | 0 | 0 | 0 | 0 | 0 | 0 | 0 | 0 | 0 | 0  | 1  | 1  | 0  | 1  | 0 | 0 | 0 | 0 |
| Bulleidia_OTU#820                       | 0 | 0 | 0 | 0 | 0 | 0 | 0 | 0 | 0 | 0 | 0 | 0  | 0  | 0  | 0  | 1  | 0 | 0 | 0 | 0 |
| Barnesiella_OTU#821                     | 0 | 0 | 0 | 0 | 0 | 0 | 0 | 0 | 0 | 0 | 0 | 0  | 0  | 0  | 0  | 1  | 0 | 0 | 0 | 0 |
| Tannerella_OTU#822                      | 0 | 0 | 0 | 0 | 0 | 0 | 0 | 0 | 0 | 0 | 0 | 0  | 0  | 0  | 0  | 1  | 0 | 0 | 0 | 0 |
| Paludibacter_OTU#823                    | 0 | 0 | 0 | 0 | 0 | 0 | 0 | 0 | 0 | 0 | 0 | 0  | 0  | 0  | 0  | 1  | 0 | 0 | 0 | 0 |
| Paludibacter_OTU#824                    | 0 | 0 | 0 | 0 | 0 | 0 | 0 | 0 | 0 | 0 | 0 | 0  | 0  | 0  | 0  | 1  | 0 | 0 | 0 | 0 |
| Schwartzia_OTU#825                      | 0 | 0 | 0 | 0 | 0 | 0 | 0 | 0 | 0 | 0 | 0 | 0  | 0  | 0  | 0  | 1  | 0 | 0 | 0 | 0 |
| Rikenella_OTU#826                       | 0 | 0 | 0 | 0 | 0 | 0 | 0 | 0 | 0 | 0 | 0 | 0  | 0  | 0  | 0  | 1  | 0 | 0 | 0 | 0 |
| Pseudozobellia_OTU#827                  | 0 | 0 | 0 | 0 | 0 | 0 | 0 | 0 | 0 | 0 | 0 | 0  | 0  | 0  | 0  | 1  | 0 | 0 | 0 | 0 |
| Tannerella_OTU#828                      | 0 | 0 | 0 | 0 | 0 | 0 | 0 | 0 | 0 | 0 | 0 | 0  | 0  | 0  | 0  | 1  | 0 | 0 | 0 | 0 |
| Paludibacter_OTU#829                    | 1 | 0 | 0 | 0 | 0 | 0 | 0 | 0 | 0 | 0 | 0 | 1  | 0  | 0  | 0  | 1  | 0 | 0 | 0 | 0 |
| Unclassified Porphyromonadaceae_OTU#830 | 0 | 0 | 0 | 0 | 0 | 0 | 0 | 0 | 0 | 0 | 1 | 0  | 0  | 1  | 0  | 2  | 0 | 0 | 0 | 0 |
| Allobaculum_OTU#831                     | 0 | 0 | 0 | 0 | 0 | 0 | 0 | 0 | 0 | 0 | 0 | 3  | 1  | 2  | 2  | 4  | 0 | 0 | 0 | 0 |
| Paludibacter_OTU#832                    | 0 | 0 | 0 | 0 | 0 | 0 | 0 | 0 | 0 | 0 | 0 | 0  | 0  | 0  | 0  | 1  | 0 | 0 | 0 | 0 |
| Barnesiella_OTU#833                     | 0 | 0 | 0 | 0 | 0 | 0 | 0 | 0 | 0 | 0 | 0 | 0  | 0  | 1  | 0  | 1  | 0 | 0 | 0 | 0 |
| Paludibacter_OTU#834                    | 0 | 0 | 0 | 0 | 0 | 0 | 0 | 0 | 0 | 0 | 0 | 0  | 2  | 0  | 2  | 5  | 0 | 0 | 0 | 0 |
| Allobaculum_OTU#835                     | 0 | 0 | 0 | 0 | 0 | 0 | 0 | 0 | 0 | 0 | 0 | 31 | 11 | 14 | 14 | 21 |   |   |   |   |
| Paludibacter_OTU#836                    | 0 | 0 | 0 | 0 | 0 | 0 | 0 | 0 | 0 | 0 | 0 | 8  | 1  | 3  | 3  | 3  | 1 | 0 | 0 | 0 |
| Paludibacter_OTU#837                    | 0 | 1 | 0 | 0 | 0 | 0 | 0 | 0 | 0 | 0 | 0 | 0  | 0  | 1  | 0  | 1  | 0 | 0 | 0 | 0 |
| Unclassified Bacteroidetes_OTU#838      | 0 | 0 | 0 | 0 | 0 | 0 | 0 | 0 | 0 | 0 | 0 | 0  | 0  | 0  | 0  | 2  | 0 | 0 | 0 | 0 |
| Barnesiella_OTU#839                     | 0 | 0 | 0 | 0 | 0 | 0 | 0 | 0 | 0 | 0 | 0 | 0  | 0  | 0  | 1  | 2  | 0 | 0 | 0 | 0 |
| Paludibacter_OTU#840                    | 0 | 0 | 0 | 0 | 0 | 0 | 0 | 0 | 0 | 0 | 0 | 0  | 0  | 0  | 0  | 1  | 0 | 0 | 0 | 0 |
| Barnesiella_OTU#841                     | 1 | 0 | 5 | 0 | 5 | 0 | 9 | 1 | 0 | 0 | 0 | 0  | 1  | 1  | 3  | 2  | 0 | 0 | 0 | 0 |
| Barnesiella_OTU#842                     | 0 | 0 | 0 | 0 | 0 | 0 | 0 | 0 | 0 | 0 | 0 | 0  | 0  | 1  | 0  | 2  | 0 | 0 | 0 | 0 |
| Limibacter_OTU#843                      | 0 | 0 | 0 | 0 | 0 | 0 | 0 | 0 | 0 | 0 | 0 | 0  | 0  | 0  | 0  | 1  | 0 | 0 | 0 | 0 |
| Unclassified Bacteroidetes_OTU#844      | 0 | 0 | 1 | 0 | 1 | 0 | 1 | 0 | 0 | 0 | 0 | 44 | 23 | 29 | 19 | 43 | 0 | 0 | 0 | 0 |
| Paludibacter_OTU#845                    | 0 | 0 | 0 | 0 | 0 | 0 | 0 | 0 | 0 | 0 | 0 | 0  | 0  | 0  | 0  | 1  | 0 | 0 | 0 | 0 |
| Unclassified Bacteroidetes_OTU#846      | 0 | 0 | 0 | 0 | 0 | 0 | 0 | 0 | 0 | 0 | 0 | 1  | 0  | 0  | 0  | 1  | 0 | 0 | 0 | 0 |

Supplementary Table 1

|                                    |    |    |   |    |    |   |   |   |   |   |   |    |         |    |    |    |   |   |   |   |
|------------------------------------|----|----|---|----|----|---|---|---|---|---|---|----|---------|----|----|----|---|---|---|---|
| Barnesiella_OTU#847                | 30 | 75 | 3 | 44 | 20 | 0 | 0 | 0 | 0 | 0 | 0 | 63 | 13<br>3 | 96 | 97 | 88 | 0 | 0 | 0 | 0 |
| Barnesiella_OTU#848                | 1  | 2  | 0 | 0  | 0  | 0 | 0 | 0 | 0 | 0 | 0 | 0  | 0       | 0  | 0  | 1  | 0 | 0 | 0 | 0 |
| Limibacter_OTU#849                 | 0  | 0  | 0 | 0  | 0  | 0 | 0 | 0 | 0 | 0 | 0 | 5  | 5       | 4  | 2  | 5  | 0 | 1 | 0 | 0 |
| Barnesiella_OTU#850                | 0  | 0  | 0 | 0  | 0  | 0 | 0 | 0 | 0 | 0 | 0 | 0  | 2       | 1  | 1  | 1  | 0 | 0 | 0 | 0 |
| Barnesiella_OTU#851                | 0  | 0  | 0 | 0  | 0  | 0 | 0 | 0 | 0 | 0 | 0 | 0  | 0       | 0  | 0  | 1  | 0 | 0 | 0 | 0 |
| Parasutterella_OTU#852             | 0  | 0  | 0 | 0  | 0  | 0 | 0 | 0 | 0 | 0 | 0 | 0  | 0       | 0  | 0  | 1  | 0 | 0 | 0 | 0 |
| Allobaculum_OTU#853                | 0  | 0  | 0 | 0  | 0  | 0 | 0 | 0 | 0 | 0 | 0 | 28 | 6       | 9  | 9  | 21 | 1 | 0 | 0 | 0 |
| Barnesiella_OTU#854                | 42 | 66 | 1 | 44 | 29 | 0 | 0 | 0 | 0 | 0 | 0 | 30 | 64      | 27 | 39 | 29 | 0 | 0 | 0 | 0 |
| Paludibacter_OTU#855               | 0  | 0  | 0 | 0  | 0  | 0 | 0 | 0 | 0 | 0 | 0 | 0  | 0       | 0  | 0  | 1  | 0 | 0 | 0 | 0 |
| Barnesiella_OTU#856                | 0  | 0  | 0 | 0  | 0  | 0 | 0 | 0 | 0 | 0 | 0 | 0  | 0       | 0  | 0  | 1  | 0 | 0 | 0 | 0 |
| Paludibacter_OTU#857               | 0  | 0  | 0 | 0  | 0  | 0 | 0 | 0 | 0 | 0 | 0 | 0  | 0       | 0  | 0  | 0  | 1 | 0 | 0 | 0 |
| Hallella_OTU#858                   | 0  | 0  | 0 | 0  | 0  | 0 | 0 | 0 | 0 | 0 | 0 | 0  | 0       | 0  | 0  | 0  | 1 | 0 | 0 | 0 |
| Finegoldia_OTU#859                 | 0  | 0  | 0 | 0  | 0  | 0 | 0 | 0 | 0 | 0 | 0 | 0  | 0       | 0  | 0  | 0  | 1 | 0 | 0 | 0 |
| Parvimonas_OTU#860                 | 0  | 0  | 0 | 0  | 0  | 0 | 0 | 0 | 0 | 0 | 0 | 0  | 0       | 0  | 0  | 0  | 1 | 0 | 0 | 0 |
| Parvimonas_OTU#861                 | 0  | 0  | 0 | 0  | 0  | 0 | 0 | 0 | 0 | 0 | 0 | 0  | 0       | 0  | 0  | 0  | 1 | 0 | 0 | 0 |
| Porphyromonadaceae_OTU#862         | 0  | 0  | 0 | 0  | 0  | 0 | 0 | 0 | 0 | 0 | 0 | 0  | 0       | 0  | 0  | 0  | 1 | 0 | 0 | 0 |
| Lactobacillus_OTU#863              | 0  | 0  | 0 | 0  | 0  | 0 | 0 | 0 | 0 | 0 | 0 | 0  | 0       | 0  | 0  | 0  | 1 | 0 | 0 | 0 |
| Paludibacter_OTU#864               | 0  | 0  | 0 | 0  | 0  | 0 | 0 | 0 | 0 | 0 | 0 | 0  | 0       | 0  | 0  | 0  | 1 | 0 | 0 | 0 |
| Paludibacter_OTU#865               | 0  | 0  | 0 | 0  | 0  | 0 | 0 | 0 | 0 | 0 | 0 | 0  | 0       | 0  | 0  | 0  | 1 | 0 | 0 | 0 |
| Thermonema_OTU#866                 | 0  | 0  | 0 | 0  | 0  | 0 | 0 | 0 | 0 | 0 | 0 | 0  | 0       | 0  | 0  | 0  | 3 | 1 | 0 | 0 |
| Paludibacter_OTU#867               | 0  | 0  | 0 | 0  | 0  | 0 | 0 | 0 | 0 | 0 | 0 | 0  | 0       | 0  | 0  | 0  | 1 | 0 | 1 | 1 |
| Anaerophaga_OTU#868                | 0  | 0  | 0 | 0  | 0  | 0 | 0 | 0 | 0 | 0 | 0 | 0  | 0       | 0  | 0  | 0  | 0 | 1 | 0 | 0 |
| Barnesiella_OTU#869                | 0  | 0  | 0 | 0  | 0  | 0 | 0 | 0 | 0 | 0 | 0 | 0  | 0       | 0  | 0  | 0  | 0 | 1 | 0 | 0 |
| Barnesiella_OTU#870                | 0  | 0  | 0 | 0  | 0  | 0 | 0 | 0 | 0 | 0 | 0 | 0  | 0       | 0  | 0  | 0  | 0 | 1 | 0 | 0 |
| Blautia_OTU#871                    | 0  | 0  | 0 | 0  | 0  | 0 | 0 | 0 | 0 | 0 | 0 | 0  | 0       | 0  | 0  | 0  | 0 | 1 | 0 | 0 |
| Limibacter_OTU#872                 | 0  | 0  | 0 | 0  | 0  | 0 | 0 | 0 | 0 | 0 | 0 | 0  | 0       | 0  | 0  | 0  | 0 | 1 | 0 | 0 |
| Paludibacter_OTU#873               | 0  | 0  | 0 | 0  | 0  | 0 | 0 | 0 | 0 | 0 | 0 | 0  | 0       | 0  | 0  | 0  | 0 | 1 | 0 | 0 |
| Rikenella_OTU#874                  | 0  | 0  | 0 | 0  | 0  | 0 | 0 | 0 | 0 | 0 | 0 | 0  | 0       | 0  | 1  | 0  | 0 | 1 | 0 | 0 |
| Unclassified Bacteroidales_OTU#875 | 0  | 0  | 0 | 0  | 0  | 0 | 0 | 0 | 0 | 0 | 0 | 0  | 1       | 0  | 0  | 0  | 0 | 1 | 0 | 0 |
| Paludibacter_OTU#876               | 0  | 0  | 0 | 0  | 0  | 0 | 0 | 1 | 0 | 0 | 0 | 2  | 1       | 0  | 0  | 0  | 0 | 1 | 0 | 1 |
| Paludibacter_OTU#877               | 0  | 0  | 0 | 0  | 0  | 0 | 0 | 0 | 0 | 0 | 0 | 0  | 0       | 0  | 0  | 0  | 0 | 1 | 0 | 0 |
| Tannerella_OTU#878                 | 0  | 0  | 0 | 0  | 0  | 0 | 0 | 0 | 0 | 0 | 0 | 0  | 0       | 0  | 0  | 0  | 0 | 1 | 0 | 0 |
| Unclassified Bacteroidales_OTU#879 | 0  | 0  | 0 | 0  | 0  | 0 | 0 | 0 | 0 | 0 | 0 | 3  | 1       | 4  | 6  | 3  | 0 | 2 | 0 | 1 |

Supplementary Table 1

|                                    |   |   |   |   |   |   |   |   |   |   |   |   |   |   |   |   |   |   |   |   |   |
|------------------------------------|---|---|---|---|---|---|---|---|---|---|---|---|---|---|---|---|---|---|---|---|---|
| Paludibacter_OTU#880               | 0 | 0 | 0 | 0 | 0 | 0 | 0 | 0 | 0 | 0 | 0 | 0 | 0 | 0 | 1 | 0 | 1 | 0 | 1 | 0 | 0 |
| Anaerophaga_OTU#881                | 0 | 0 | 0 | 0 | 0 | 0 | 0 | 0 | 0 | 0 | 0 | 0 | 0 | 0 | 0 | 0 | 0 | 0 | 1 | 0 | 0 |
| Paludibacter_OTU#882               | 0 | 0 | 0 | 0 | 0 | 0 | 0 | 0 | 0 | 0 | 0 | 0 | 0 | 0 | 0 | 0 | 0 | 0 | 1 | 0 | 0 |
| Paludibacter_OTU#883               | 0 | 0 | 0 | 0 | 0 | 0 | 0 | 0 | 0 | 0 | 0 | 0 | 0 | 0 | 0 | 0 | 0 | 0 | 1 | 0 | 0 |
| Barnesiella_OTU#884                | 0 | 0 | 0 | 0 | 0 | 0 | 0 | 0 | 0 | 0 | 0 | 0 | 0 | 0 | 0 | 0 | 0 | 0 | 1 | 0 | 0 |
| Paludibacter_OTU#885               | 0 | 0 | 0 | 0 | 0 | 0 | 0 | 0 | 0 | 0 | 0 | 0 | 0 | 0 | 0 | 0 | 0 | 0 | 1 | 0 | 0 |
| Rikenella_OTU#886                  | 0 | 0 | 0 | 0 | 0 | 0 | 0 | 0 | 0 | 0 | 0 | 3 | 5 | 7 | 9 | 8 | 4 | 9 | 4 | 9 |   |
| Paludibacter_OTU#887               | 0 | 0 | 0 | 0 | 0 | 0 | 0 | 0 | 0 | 0 | 0 | 0 | 0 | 0 | 0 | 0 | 0 | 0 | 1 | 0 | 0 |
| Paludibacter_OTU#888               | 0 | 0 | 0 | 0 | 0 | 0 | 0 | 0 | 0 | 0 | 0 | 0 | 0 | 0 | 0 | 0 | 0 | 0 | 1 | 0 | 0 |
| Barnesiella_OTU#889                | 0 | 0 | 0 | 0 | 0 | 0 | 0 | 0 | 0 | 0 | 0 | 0 | 0 | 0 | 0 | 0 | 0 | 0 | 1 | 0 | 0 |
| Pseudozobellia_OTU#890             | 0 | 0 | 0 | 0 | 0 | 0 | 0 | 0 | 0 | 0 | 0 | 0 | 0 | 0 | 0 | 0 | 0 | 0 | 1 | 0 | 0 |
| Butyricimonas_OTU#891              | 0 | 0 | 0 | 0 | 0 | 0 | 0 | 0 | 0 | 0 | 0 | 0 | 0 | 0 | 0 | 0 | 0 | 0 | 1 | 0 | 0 |
| Peptococcus_OTU#892                | 0 | 0 | 0 | 0 | 0 | 0 | 0 | 0 | 0 | 0 | 0 | 0 | 0 | 0 | 0 | 0 | 0 | 0 | 1 | 0 | 0 |
| Limibacter_OTU#893                 | 0 | 0 | 0 | 0 | 0 | 0 | 0 | 0 | 0 | 0 | 0 | 0 | 0 | 0 | 0 | 0 | 0 | 0 | 1 | 0 | 0 |
| Barnesiella_OTU#894                | 1 | 0 | 0 | 0 | 0 | 0 | 0 | 0 | 0 | 0 | 0 | 0 | 1 | 0 | 2 | 0 | 0 | 0 | 1 | 0 | 0 |
| Paludibacter_OTU#895               | 0 | 0 | 0 | 0 | 0 | 0 | 0 | 0 | 0 | 0 | 0 | 0 | 0 | 0 | 0 | 0 | 0 | 0 | 1 | 0 | 0 |
| Rikenella_OTU#896                  | 0 | 0 | 0 | 0 | 0 | 0 | 0 | 0 | 0 | 0 | 0 | 0 | 0 | 0 | 0 | 0 | 0 | 0 | 1 | 0 | 0 |
| Paludibacter_OTU#897               | 0 | 0 | 0 | 0 | 0 | 0 | 0 | 0 | 0 | 0 | 0 | 0 | 0 | 0 | 0 | 0 | 0 | 0 | 1 | 0 | 0 |
| Paludibacter_OTU#898               | 0 | 0 | 0 | 0 | 0 | 0 | 0 | 0 | 0 | 0 | 0 | 0 | 0 | 0 | 0 | 0 | 0 | 0 | 1 | 0 | 0 |
| Paludibacter_OTU#899               | 0 | 0 | 0 | 0 | 0 | 0 | 0 | 0 | 0 | 0 | 0 | 0 | 0 | 0 | 0 | 0 | 0 | 0 | 1 | 0 | 0 |
| Barnesiella_OTU#900                | 0 | 0 | 0 | 0 | 0 | 0 | 0 | 0 | 0 | 0 | 0 | 0 | 0 | 0 | 0 | 0 | 0 | 0 | 1 | 0 | 0 |
| Tannerella_OTU#901                 | 0 | 0 | 0 | 0 | 0 | 0 | 0 | 0 | 0 | 0 | 0 | 0 | 0 | 0 | 0 | 0 | 0 | 0 | 1 | 0 | 0 |
| Unclassified Bacteroidales_OTU#902 | 0 | 0 | 0 | 0 | 0 | 0 | 0 | 0 | 0 | 0 | 0 | 0 | 0 | 0 | 1 | 0 | 0 | 0 | 1 | 0 | 0 |
| unclassified_OTU#903               | 0 | 0 | 0 | 1 | 0 | 0 | 0 | 0 | 0 | 0 | 0 | 0 | 0 | 0 | 0 | 0 | 0 | 0 | 1 | 0 | 0 |
| Paludibacter_OTU#904               | 0 | 0 | 0 | 0 | 0 | 0 | 0 | 0 | 0 | 0 | 0 | 0 | 0 | 0 | 0 | 0 | 0 | 0 | 1 | 0 | 0 |
| Paludibacter_OTU#905               | 0 | 1 | 0 | 0 | 0 | 0 | 0 | 1 | 0 | 0 | 0 | 0 | 0 | 0 | 0 | 0 | 0 | 0 | 4 | 2 | 0 |
| Paludibacter_OTU#906               | 0 | 0 | 0 | 0 | 0 | 0 | 0 | 0 | 0 | 5 | 0 | 0 | 0 | 1 | 0 | 0 | 0 | 1 | 0 | 0 | 0 |
| Zhangella_OTU#907                  | 0 | 0 | 0 | 0 | 0 | 0 | 0 | 0 | 0 | 0 | 0 | 0 | 0 | 0 | 0 | 0 | 0 | 0 | 1 | 0 | 0 |
| Aquiflexum_OTU#908                 | 0 | 0 | 0 | 0 | 0 | 0 | 0 | 0 | 0 | 0 | 0 | 0 | 0 | 0 | 0 | 0 | 0 | 0 | 1 | 0 | 0 |
| Barnesiella_OTU#909                | 0 | 0 | 0 | 0 | 0 | 0 | 0 | 0 | 0 | 0 | 0 | 0 | 0 | 0 | 0 | 0 | 0 | 0 | 1 | 0 | 0 |
| Paludibacter_OTU#910               | 0 | 0 | 0 | 0 | 0 | 0 | 1 | 5 | 0 | 0 | 0 | 0 | 0 | 0 | 2 | 1 | 0 | 4 | 0 | 0 | 0 |
| Tannerella_OTU#911                 | 0 | 0 | 0 | 0 | 0 | 0 | 0 | 0 | 0 | 0 | 0 | 0 | 0 | 0 | 0 | 0 | 0 | 0 | 1 | 0 | 0 |
| Rikenella_OTU#912                  | 0 | 0 | 0 | 0 | 0 | 0 | 0 | 0 | 0 | 0 | 0 | 0 | 0 | 0 | 0 | 0 | 0 | 0 | 1 | 0 | 0 |

Supplementary Table 1

|                                    |   |   |   |   |   |   |   |   |   |   |    |   |   |   |   |   |   |   |   |   |
|------------------------------------|---|---|---|---|---|---|---|---|---|---|----|---|---|---|---|---|---|---|---|---|
| Unclassified Bacteroidales_OTU#913 | 0 | 0 | 0 | 0 | 0 | 0 | 0 | 0 | 0 | 0 | 0  | 1 | 0 | 0 | 0 | 0 | 0 | 1 | 0 | 0 |
| Anaerophaga_OTU#914                | 0 | 0 | 0 | 0 | 0 | 0 | 0 | 0 | 0 | 0 | 0  | 0 | 0 | 0 | 0 | 0 | 0 | 1 | 0 | 0 |
| Paludibacter_OTU#915               | 0 | 0 | 0 | 0 | 0 | 0 | 0 | 0 | 0 | 0 | 0  | 0 | 0 | 0 | 0 | 0 | 0 | 1 | 0 | 0 |
| Paludibacter_OTU#916               | 0 | 0 | 0 | 0 | 0 | 0 | 0 | 0 | 0 | 0 | 0  | 0 | 0 | 0 | 0 | 0 | 0 | 1 | 0 | 0 |
| Rikenella_OTU#917                  | 0 | 0 | 0 | 0 | 0 | 0 | 0 | 8 | 0 | 0 | 0  | 0 | 0 | 0 | 0 | 1 | 0 | 5 | 0 | 1 |
| Paludibacter_OTU#918               | 0 | 0 | 0 | 0 | 0 | 0 | 0 | 0 | 0 | 0 | 0  | 0 | 0 | 0 | 0 | 0 | 0 | 1 | 0 | 0 |
| Paludibacter_OTU#919               | 0 | 0 | 0 | 0 | 0 | 0 | 0 | 0 | 0 | 0 | 0  | 0 | 0 | 0 | 0 | 0 | 0 | 1 | 0 | 0 |
| Paludibacter_OTU#920               | 0 | 0 | 0 | 0 | 0 | 0 | 0 | 0 | 0 | 0 | 0  | 0 | 0 | 1 | 1 | 0 | 0 | 2 | 1 | 0 |
| Paludibacter_OTU#921               | 0 | 1 | 0 | 0 | 0 | 0 | 0 | 0 | 0 | 0 | 0  | 1 | 0 | 0 | 0 | 0 | 0 | 1 | 2 | 0 |
| Unclassified Bacteroidetes_OTU#922 | 0 | 0 | 0 | 0 | 0 | 0 | 0 | 0 | 0 | 0 | 0  | 0 | 1 | 0 | 1 | 1 | 1 | 4 | 0 | 0 |
| Unclassified Bacteroidales_OTU#923 | 0 | 0 | 0 | 0 | 0 | 0 | 0 | 0 | 0 | 0 | 0  | 1 | 0 | 0 | 1 | 0 | 1 | 1 | 0 | 0 |
| Paludibacter_OTU#924               | 0 | 0 | 0 | 0 | 0 | 0 | 0 | 0 | 0 | 0 | 0  | 0 | 0 | 0 | 0 | 0 | 0 | 1 | 0 | 0 |
| Anaerophaga_OTU#925                | 0 | 2 | 0 | 0 | 0 | 0 | 3 | 3 | 0 | 0 | 0  | 0 | 2 | 0 | 1 | 0 | 0 | 1 | 0 | 0 |
| Barnesiella_OTU#926                | 0 | 0 | 0 | 0 | 0 | 0 | 0 | 0 | 0 | 0 | 0  | 0 | 0 | 0 | 0 | 0 | 0 | 1 | 0 | 0 |
| Tannerella_OTU#927                 | 0 | 0 | 0 | 0 | 0 | 0 | 0 | 0 | 0 | 0 | 0  | 0 | 0 | 0 | 0 | 0 | 0 | 1 | 0 | 0 |
| Paludibacter_OTU#928               | 0 | 0 | 0 | 0 | 0 | 0 | 0 | 0 | 0 | 0 | 0  | 0 | 0 | 0 | 0 | 0 | 0 | 1 | 0 | 0 |
| Rikenella_OTU#929                  | 1 | 0 | 0 | 1 | 1 | 0 | 0 | 0 | 0 | 0 | 0  | 1 | 0 | 2 | 0 | 0 | 0 | 2 | 0 | 0 |
| Paludibacter_OTU#930               | 0 | 0 | 0 | 0 | 0 | 0 | 0 | 0 | 0 | 0 | 0  | 0 | 0 | 0 | 0 | 0 | 0 | 1 | 0 | 0 |
| Hallella_OTU#931                   | 0 | 0 | 0 | 0 | 0 | 0 | 0 | 0 | 0 | 0 | 0  | 0 | 0 | 0 | 0 | 0 | 0 | 1 | 0 | 0 |
| Paludibacter_OTU#932               | 0 | 0 | 0 | 0 | 1 | 0 | 0 | 0 | 0 | 0 | 0  | 0 | 0 | 0 | 0 | 0 | 0 | 3 | 0 | 2 |
| Paludibacter_OTU#933               | 0 | 0 | 0 | 0 | 0 | 0 | 0 | 0 | 0 | 0 | 0  | 0 | 0 | 0 | 0 | 0 | 0 | 0 | 1 | 0 |
| Prevotella_OTU#934                 | 0 | 0 | 0 | 0 | 0 | 0 | 0 | 0 | 0 | 0 | 0  | 0 | 0 | 0 | 0 | 0 | 0 | 0 | 1 | 0 |
| Barnesiella_OTU#935                | 0 | 0 | 0 | 0 | 0 | 0 | 0 | 0 | 0 | 0 | 0  | 4 | 4 | 4 | 6 | 4 | 1 | 0 | 2 | 0 |
| Barnesiella_OTU#936                | 0 | 0 | 0 | 0 | 0 | 0 | 0 | 0 | 0 | 0 | 0  | 0 | 0 | 0 | 0 | 0 | 1 | 0 | 1 | 0 |
| Paludibacter_OTU#937               | 0 | 0 | 0 | 0 | 0 | 0 | 0 | 0 | 0 | 0 | 0  | 0 | 0 | 0 | 0 | 0 | 0 | 0 | 1 | 0 |
| Anaerophaga_OTU#938                | 0 | 0 | 0 | 0 | 0 | 0 | 0 | 0 | 0 | 0 | 0  | 0 | 0 | 0 | 0 | 0 | 0 | 0 | 1 | 0 |
| Anaerophaga_OTU#939                | 0 | 0 | 0 | 0 | 0 | 0 | 0 | 0 | 0 | 0 | 14 | 7 | 1 | 1 | 6 | 8 | 0 | 1 | 3 | 0 |
| Paludibacter_OTU#940               | 0 | 0 | 0 | 0 | 0 | 0 | 0 | 0 | 0 | 0 | 0  | 0 | 0 | 0 | 0 | 0 | 0 | 0 | 1 | 0 |
| Rikenella_OTU#941                  | 0 | 0 | 0 | 0 | 0 | 0 | 0 | 0 | 0 | 0 | 0  | 0 | 0 | 0 | 0 | 0 | 0 | 0 | 1 | 0 |
| Anaerophaga_OTU#942                | 0 | 0 | 0 | 0 | 0 | 0 | 0 | 0 | 0 | 0 | 0  | 0 | 0 | 0 | 0 | 0 | 0 | 0 | 1 | 0 |
| Paludibacter_OTU#943               | 0 | 0 | 0 | 0 | 0 | 0 | 0 | 0 | 0 | 0 | 0  | 0 | 0 | 0 | 0 | 0 | 0 | 0 | 1 | 0 |
| Barnesiella_OTU#944                | 0 | 0 | 0 | 0 | 0 | 0 | 0 | 0 | 0 | 0 | 0  | 0 | 0 | 0 | 0 | 0 | 0 | 0 | 1 | 0 |
| Barnesiella_OTU#945                | 0 | 0 | 0 | 0 | 0 | 0 | 0 | 0 | 0 | 0 | 0  | 0 | 0 | 0 | 0 | 0 | 0 | 0 | 1 | 0 |

Supplementary Table 1

|                                            |   |   |   |   |   |   |   |   |   |   |   |   |   |   |   |   |   |   |   |   |
|--------------------------------------------|---|---|---|---|---|---|---|---|---|---|---|---|---|---|---|---|---|---|---|---|
| Rikenella_OTU#946                          | 0 | 0 | 0 | 0 | 0 | 0 | 0 | 0 | 0 | 0 | 0 | 0 | 0 | 0 | 0 | 0 | 0 | 0 | 1 | 0 |
| Rikenella_OTU#947                          | 0 | 0 | 0 | 0 | 0 | 0 | 0 | 0 | 0 | 0 | 0 | 0 | 0 | 0 | 0 | 0 | 0 | 0 | 1 | 0 |
| Paludibacter_OTU#948                       | 0 | 0 | 0 | 0 | 0 | 0 | 0 | 0 | 0 | 0 | 0 | 0 | 0 | 0 | 0 | 0 | 0 | 0 | 1 | 0 |
| Paludibacter_OTU#949                       | 0 | 0 | 0 | 0 | 0 | 0 | 2 | 1 | 0 | 0 | 0 | 0 | 1 | 2 | 0 | 0 | 0 | 2 | 3 | 0 |
| Paludibacter_OTU#950                       | 0 | 0 | 0 | 0 | 0 | 0 | 0 | 0 | 0 | 0 | 0 | 0 | 0 | 0 | 0 | 0 | 0 | 0 | 1 | 0 |
| Ethanoligenens_OTU#951                     | 0 | 0 | 0 | 0 | 0 | 0 | 0 | 0 | 0 | 0 | 0 | 0 | 0 | 0 | 0 | 0 | 0 | 0 | 1 | 0 |
| Paludibacter_OTU#952                       | 0 | 0 | 1 | 0 | 0 | 0 | 0 | 0 | 0 | 0 | 0 | 0 | 0 | 0 | 0 | 0 | 0 | 0 | 1 | 0 |
| Barnesiella_OTU#953                        | 0 | 0 | 0 | 0 | 0 | 0 | 0 | 0 | 0 | 0 | 0 | 0 | 0 | 0 | 0 | 0 | 0 | 0 | 1 | 0 |
| Paludibacter_OTU#954                       | 0 | 0 | 0 | 0 | 0 | 0 | 0 | 0 | 0 | 0 | 0 | 0 | 0 | 0 | 0 | 0 | 0 | 0 | 1 | 0 |
| Parasutterella_OTU#955                     | 0 | 0 | 0 | 0 | 0 | 0 | 0 | 0 | 0 | 0 | 0 | 0 | 0 | 0 | 0 | 0 | 0 | 0 | 1 | 0 |
| Salsuginibacillus_OTU#956                  | 0 | 0 | 0 | 0 | 0 | 0 | 0 | 0 | 0 | 0 | 0 | 0 | 0 | 0 | 0 | 0 | 0 | 0 | 1 | 0 |
| Paludibacter_OTU#957                       | 0 | 0 | 0 | 0 | 0 | 0 | 0 | 0 | 0 | 0 | 0 | 0 | 0 | 0 | 0 | 0 | 0 | 0 | 1 | 0 |
| Paludibacter_OTU#958                       | 0 | 0 | 0 | 0 | 0 | 0 | 0 | 0 | 0 | 0 | 0 | 0 | 0 | 0 | 0 | 0 | 0 | 0 | 1 | 0 |
| Paludibacter_OTU#959                       | 0 | 0 | 0 | 0 | 0 | 0 | 0 | 0 | 0 | 0 | 0 | 0 | 1 | 0 | 0 | 0 | 0 | 0 | 1 | 0 |
| Paludibacter_OTU#960                       | 0 | 0 | 0 | 0 | 0 | 0 | 0 | 0 | 0 | 0 | 0 | 0 | 1 | 0 | 0 | 0 | 0 | 3 | 2 | 0 |
| Unclassified<br>Porphyromonadaceae_OTU#961 | 0 | 0 | 0 | 0 | 0 | 0 | 0 | 0 | 0 | 0 | 0 | 0 | 1 | 2 | 2 | 1 | 1 | 3 | 2 | 0 |
| Anaerophaga_OTU#962                        | 0 | 0 | 0 | 0 | 0 | 0 | 0 | 0 | 0 | 0 | 0 | 0 | 0 | 0 | 0 | 0 | 0 | 0 | 1 | 0 |
| Paludibacter_OTU#963                       | 0 | 0 | 0 | 0 | 0 | 0 | 0 | 0 | 0 | 0 | 0 | 0 | 0 | 0 | 2 | 0 | 0 | 0 | 1 | 0 |
| Paludibacter_OTU#964                       | 0 | 0 | 0 | 0 | 0 | 0 | 0 | 0 | 0 | 0 | 0 | 0 | 0 | 0 | 0 | 0 | 0 | 0 | 1 | 0 |
| Paludibacter_OTU#965                       | 0 | 1 | 0 | 0 | 0 | 0 | 0 | 0 | 0 | 0 | 0 | 0 | 0 | 0 | 0 | 0 | 0 | 0 | 1 | 0 |
| Parasutterella_OTU#966                     | 0 | 0 | 0 | 0 | 0 | 0 | 0 | 0 | 0 | 0 | 0 | 0 | 0 | 0 | 0 | 0 | 0 | 1 | 1 | 0 |
| Paludibacter_OTU#967                       | 0 | 0 | 0 | 0 | 0 | 0 | 0 | 0 | 0 | 0 | 0 | 0 | 0 | 0 | 0 | 0 | 0 | 0 | 1 | 0 |
| Anaerophaga_OTU#968                        | 0 | 0 | 0 | 0 | 0 | 0 | 0 | 0 | 0 | 0 | 0 | 0 | 0 | 0 | 0 | 0 | 0 | 0 | 1 | 0 |
| Paludibacter_OTU#969                       | 0 | 0 | 0 | 0 | 0 | 0 | 0 | 0 | 0 | 0 | 0 | 0 | 0 | 0 | 0 | 0 | 0 | 0 | 1 | 0 |
| Eggerthella_OTU#970                        | 0 | 0 | 0 | 0 | 0 | 0 | 0 | 0 | 0 | 0 | 0 | 0 | 1 | 0 | 0 | 0 | 1 | 0 | 1 | 0 |
| Paludibacter_OTU#971                       | 0 | 0 | 0 | 0 | 0 | 0 | 2 | 0 | 0 | 0 | 0 | 0 | 0 | 1 | 0 | 0 | 0 | 0 | 1 | 0 |
| Paludibacter_OTU#972                       | 0 | 0 | 0 | 0 | 0 | 0 | 0 | 0 | 0 | 0 | 0 | 0 | 0 | 0 | 0 | 0 | 0 | 0 | 1 | 0 |
| Paludibacter_OTU#973                       | 0 | 0 | 0 | 0 | 0 | 0 | 0 | 0 | 0 | 0 | 0 | 0 | 0 | 0 | 0 | 0 | 0 | 0 | 1 | 0 |
| Paludibacter_OTU#974                       | 0 | 0 | 0 | 0 | 0 | 0 | 0 | 0 | 0 | 0 | 0 | 0 | 0 | 0 | 0 | 0 | 0 | 0 | 1 | 0 |
| Paludibacter_OTU#975                       | 0 | 0 | 0 | 0 | 0 | 0 | 0 | 0 | 0 | 0 | 0 | 0 | 1 | 1 | 0 | 0 | 0 | 0 | 1 | 0 |
| Paludibacter_OTU#976                       | 0 | 1 | 0 | 1 | 1 | 0 | 3 | 1 | 0 | 0 | 0 | 1 | 0 | 0 | 0 | 0 | 0 | 1 | 1 | 0 |
| Paludibacter_OTU#977                       | 0 | 0 | 0 | 1 | 0 | 0 | 0 | 0 | 0 | 0 | 0 | 0 | 0 | 0 | 0 | 0 | 0 | 0 | 1 | 0 |
| Unclassified Bacteroidales_OTU#978         | 0 | 1 | 0 | 0 | 0 | 0 | 0 | 0 | 0 | 0 | 0 | 0 | 0 | 1 | 0 | 1 | 0 | 0 | 1 | 0 |

Supplementary Table 1

|                                     |   |   |   |   |   |   |   |   |   |   |   |   |   |   |   |   |   |   |   |   |   |
|-------------------------------------|---|---|---|---|---|---|---|---|---|---|---|---|---|---|---|---|---|---|---|---|---|
| Paludibacter_OTU#979                | 0 | 0 | 0 | 0 | 0 | 0 | 0 | 0 | 0 | 0 | 0 | 0 | 0 | 0 | 0 | 0 | 1 | 0 | 1 | 1 | 0 |
| Barnesiella_OTU#980                 | 0 | 0 | 0 | 0 | 0 | 0 | 0 | 0 | 0 | 0 | 0 | 0 | 0 | 0 | 0 | 0 | 0 | 0 | 0 | 1 | 0 |
| Unclassified Bacteroidales_OTU#981  | 0 | 0 | 0 | 0 | 0 | 0 | 2 | 0 | 0 | 0 | 0 | 0 | 0 | 0 | 0 | 0 | 0 | 0 | 0 | 1 | 0 |
| Dorea_OTU#982                       | 0 | 0 | 0 | 0 | 0 | 0 | 0 | 0 | 0 | 0 | 0 | 0 | 0 | 0 | 0 | 0 | 0 | 0 | 0 | 1 | 0 |
| Dorea_OTU#983                       | 0 | 0 | 0 | 0 | 0 | 0 | 0 | 3 | 0 | 0 | 0 | 0 | 0 | 0 | 0 | 0 | 0 | 0 | 0 | 2 | 0 |
| Paludibacter_OTU#984                | 0 | 0 | 0 | 0 | 0 | 0 | 0 | 0 | 0 | 0 | 0 | 0 | 0 | 0 | 0 | 0 | 0 | 0 | 0 | 1 | 0 |
| Asaccharobacter_OTU#985             | 0 | 0 | 0 | 0 | 0 | 0 | 0 | 0 | 0 | 0 | 0 | 0 | 0 | 0 | 0 | 0 | 0 | 0 | 0 | 1 | 0 |
| Blautia_OTU#986                     | 0 | 0 | 0 | 0 | 0 | 0 | 0 | 0 | 0 | 0 | 0 | 0 | 0 | 0 | 0 | 0 | 0 | 0 | 0 | 1 | 0 |
| Paludibacter_OTU#987                | 0 | 0 | 0 | 0 | 0 | 0 | 0 | 0 | 0 | 0 | 0 | 0 | 0 | 0 | 0 | 0 | 0 | 0 | 0 | 1 | 0 |
| Anaerophaga_OTU#988                 | 0 | 0 | 0 | 0 | 0 | 0 | 0 | 0 | 0 | 0 | 0 | 0 | 0 | 0 | 0 | 0 | 0 | 0 | 0 | 1 | 0 |
| Paludibacter_OTU#989                | 0 | 0 | 0 | 0 | 1 | 0 | 0 | 0 | 0 | 0 | 0 | 0 | 1 | 0 | 0 | 0 | 0 | 0 | 0 | 1 | 0 |
| Paludibacter_OTU#990                | 0 | 0 | 0 | 0 | 0 | 0 | 0 | 0 | 0 | 0 | 0 | 0 | 0 | 0 | 0 | 0 | 0 | 0 | 0 | 1 | 0 |
| Anaerophaga_OTU#991                 | 0 | 0 | 0 | 0 | 0 | 0 | 0 | 0 | 0 | 0 | 0 | 0 | 1 | 0 | 0 | 0 | 0 | 0 | 0 | 2 | 0 |
| Anaerophaga_OTU#992                 | 0 | 0 | 0 | 0 | 0 | 0 | 0 | 0 | 0 | 0 | 0 | 1 | 0 | 0 | 0 | 1 | 0 | 0 | 0 | 1 | 0 |
| Anaerophaga_OTU#993                 | 0 | 0 | 0 | 0 | 0 | 0 | 0 | 0 | 0 | 0 | 0 | 0 | 0 | 0 | 0 | 0 | 0 | 0 | 0 | 1 | 0 |
| Paludibacter_OTU#994                | 0 | 0 | 0 | 0 | 0 | 0 | 0 | 0 | 0 | 0 | 0 | 1 | 1 | 0 | 0 | 2 | 0 | 0 | 0 | 1 | 1 |
| Paludibacter_OTU#995                | 0 | 0 | 0 | 0 | 0 | 0 | 0 | 1 | 0 | 0 | 0 | 0 | 0 | 1 | 0 | 0 | 0 | 0 | 3 | 0 | 1 |
| Anaerophaga_OTU#996                 | 0 | 0 | 0 | 0 | 0 | 0 | 0 | 0 | 0 | 0 | 0 | 0 | 0 | 0 | 0 | 1 | 0 | 0 | 0 | 0 | 1 |
| Paludibacter_OTU#997                | 0 | 0 | 0 | 0 | 0 | 0 | 1 | 0 | 0 | 0 | 0 | 1 | 0 | 0 | 0 | 0 | 0 | 0 | 0 | 0 | 1 |
| Dorea_OTU#998                       | 0 | 0 | 0 | 0 | 0 | 0 | 0 | 0 | 0 | 0 | 0 | 0 | 0 | 0 | 0 | 0 | 0 | 0 | 0 | 0 | 1 |
| Paludibacter_OTU#999                | 0 | 0 | 0 | 0 | 0 | 0 | 0 | 0 | 0 | 0 | 0 | 1 | 0 | 0 | 0 | 0 | 0 | 0 | 1 | 0 | 1 |
| unclassified_OTU#1000               | 0 | 0 | 0 | 0 | 0 | 0 | 0 | 0 | 0 | 0 | 1 | 0 | 1 | 1 | 3 | 0 | 0 | 0 | 0 | 0 | 1 |
| Tannerella_OTU#1001                 | 0 | 0 | 0 | 0 | 0 | 0 | 0 | 0 | 0 | 0 | 0 | 0 | 0 | 0 | 0 | 0 | 0 | 0 | 0 | 0 | 1 |
| Rikenella_OTU#1002                  | 0 | 0 | 0 | 0 | 0 | 0 | 1 | 0 | 0 | 0 | 0 | 0 | 0 | 0 | 1 | 0 | 0 | 0 | 1 | 0 | 2 |
| Paludibacter_OTU#1003               | 0 | 1 | 0 | 0 | 0 | 0 | 0 | 2 | 0 | 0 | 0 | 0 | 1 | 0 | 0 | 0 | 0 | 0 | 3 | 0 | 1 |
| Unclassified Bacteroidales_OTU#1004 | 0 | 0 | 0 | 0 | 0 | 0 | 0 | 0 | 0 | 0 | 0 | 0 | 0 | 0 | 0 | 0 | 0 | 0 | 1 | 0 | 1 |
| Barnesiella_OTU#1005                | 0 | 0 | 0 | 0 | 0 | 0 | 0 | 0 | 0 | 0 | 0 | 0 | 0 | 0 | 0 | 0 | 0 | 0 | 0 | 0 | 1 |
| Rikenella_OTU#1006                  | 0 | 0 | 1 | 0 | 1 | 0 | 0 | 0 | 0 | 0 | 0 | 0 | 1 | 0 | 0 | 0 | 0 | 0 | 1 | 0 | 1 |
| Marvinbryantia_OTU#1007             | 0 | 0 | 0 | 0 | 0 | 0 | 0 | 0 | 0 | 0 | 0 | 0 | 0 | 0 | 0 | 0 | 0 | 0 | 0 | 1 | 1 |
| Howardella_OTU#1008                 | 0 | 0 | 0 | 0 | 0 | 0 | 0 | 0 | 0 | 0 | 0 | 0 | 0 | 0 | 0 | 0 | 0 | 0 | 0 | 0 | 1 |
| Barnesiella_OTU#1009                | 0 | 0 | 0 | 0 | 0 | 0 | 0 | 0 | 0 | 0 | 0 | 0 | 0 | 0 | 0 | 0 | 0 | 0 | 0 | 0 | 1 |
| Pseudozobellia_OTU#1010             | 0 | 0 | 0 | 0 | 0 | 0 | 0 | 0 | 0 | 0 | 0 | 0 | 0 | 0 | 0 | 0 | 0 | 0 | 0 | 0 | 1 |
| Papillibacter_OTU#1011              | 0 | 0 | 0 | 0 | 0 | 0 | 0 | 0 | 0 | 0 | 0 | 0 | 0 | 0 | 0 | 0 | 0 | 0 | 0 | 0 | 1 |

Supplementary Table 1

|                                     |   |   |   |   |   |   |    |    |   |   |    |   |   |   |   |   |    |   |    |   |
|-------------------------------------|---|---|---|---|---|---|----|----|---|---|----|---|---|---|---|---|----|---|----|---|
| Paludibacter_OTU#1012               | 0 | 0 | 0 | 0 | 0 | 0 | 0  | 0  | 0 | 0 | 2  | 0 | 0 | 0 | 0 | 0 | 0  | 0 | 1  |   |
| Barnesiella_OTU#1013                | 0 | 1 | 0 | 0 | 0 | 0 | 0  | 0  | 0 | 0 | 0  | 0 | 0 | 0 | 0 | 0 | 0  | 0 | 1  |   |
| Rikenella_OTU#1014                  | 0 | 0 | 0 | 0 | 0 | 0 | 0  | 0  | 0 | 0 | 0  | 0 | 0 | 0 | 0 | 0 | 0  | 0 | 1  |   |
| Paludibacter_OTU#1015               | 0 | 0 | 0 | 0 | 0 | 0 | 0  | 0  | 0 | 0 | 0  | 0 | 0 | 0 | 0 | 0 | 0  | 0 | 1  |   |
| Dorea_OTU#1016                      | 0 | 0 | 0 | 0 | 0 | 0 | 0  | 0  | 0 | 0 | 0  | 0 | 0 | 0 | 0 | 0 | 0  | 0 | 1  |   |
| Limibacter_OTU#1017                 | 0 | 0 | 0 | 0 | 0 | 0 | 0  | 0  | 0 | 0 | 0  | 0 | 0 | 0 | 0 | 0 | 0  | 0 | 1  |   |
| Rikenella_OTU#1018                  | 0 | 0 | 0 | 0 | 0 | 0 | 0  | 0  | 0 | 0 | 0  | 0 | 0 | 0 | 2 | 0 | 0  | 0 | 1  |   |
| Paludibacter_OTU#1019               | 0 | 0 | 0 | 0 | 0 | 0 | 0  | 0  | 0 | 0 | 0  | 0 | 2 | 0 | 0 | 0 | 0  | 0 | 1  |   |
| Rikenella_OTU#1020                  | 0 | 0 | 0 | 0 | 1 | 0 | 0  | 0  | 0 | 0 | 0  | 0 | 1 | 0 | 0 | 0 | 0  | 0 | 1  |   |
| Parasporobacterium_OTU#1021         | 0 | 0 | 0 | 0 | 0 | 0 | 0  | 0  | 0 | 0 | 0  | 0 | 0 | 0 | 0 | 0 | 0  | 0 | 1  |   |
| Paludibacter_OTU#1022               | 0 | 2 | 0 | 1 | 1 | 0 | 7  | 4  | 0 | 0 | 0  | 1 | 1 | 1 | 1 | 5 | 0  | 1 | 2  | 1 |
| Paludibacter_OTU#1023               | 0 | 0 | 0 | 0 | 0 | 0 | 0  | 0  | 0 | 0 | 0  | 0 | 0 | 0 | 0 | 0 | 0  | 0 | 1  |   |
| Paludibacter_OTU#1024               | 0 | 0 | 0 | 0 | 0 | 0 | 0  | 0  | 0 | 0 | 0  | 0 | 0 | 0 | 0 | 0 | 0  | 0 | 1  |   |
| Paludibacter_OTU#1025               | 0 | 0 | 0 | 0 | 0 | 0 | 0  | 0  | 0 | 0 | 0  | 0 | 0 | 2 | 0 | 0 | 0  | 0 | 1  |   |
| Tannerella_OTU#1026                 | 0 | 0 | 0 | 0 | 0 | 0 | 0  | 0  | 0 | 0 | 0  | 0 | 1 | 0 | 0 | 0 | 0  | 1 | 1  |   |
| Tannerella_OTU#1027                 | 0 | 0 | 0 | 0 | 0 | 0 | 0  | 0  | 0 | 0 | 0  | 0 | 0 | 0 | 0 | 0 | 0  | 0 | 1  |   |
| Barnesiella_OTU#1028                | 0 | 0 | 0 | 0 | 0 | 0 | 0  | 0  | 0 | 0 | 0  | 0 | 0 | 0 | 0 | 0 | 0  | 0 | 1  |   |
| Paludibacter_OTU#1029               | 0 | 0 | 0 | 0 | 0 | 0 | 0  | 0  | 0 | 0 | 0  | 0 | 0 | 0 | 0 | 0 | 0  | 1 | 1  | 1 |
| Paludibacter_OTU#1030               | 0 | 0 | 0 | 0 | 0 | 0 | 0  | 0  | 0 | 0 | 0  | 0 | 0 | 0 | 0 | 0 | 0  | 0 | 1  |   |
| Tannerella_OTU#1031                 | 0 | 0 | 0 | 0 | 0 | 0 | 0  | 0  | 0 | 0 | 0  | 0 | 0 | 0 | 0 | 0 | 0  | 0 | 1  |   |
| Dorea_OTU#1032                      | 0 | 0 | 0 | 0 | 0 | 0 | 0  | 0  | 0 | 0 | 0  | 0 | 0 | 0 | 0 | 0 | 0  | 0 | 1  | 2 |
| Anaerophaga_OTU#1033                | 0 | 0 | 0 | 0 | 0 | 0 | 0  | 0  | 0 | 0 | 0  | 0 | 0 | 0 | 1 | 0 | 0  | 0 | 1  |   |
| Paludibacter_OTU#1034               | 0 | 2 | 2 | 1 | 6 | 1 | 16 | 17 | 0 | 0 | 29 | 0 | 1 | 1 | 0 | 0 | 1  | 6 | 2  | 1 |
| Paludibacter_OTU#1035               | 0 | 0 | 0 | 0 | 0 | 0 | 0  | 0  | 0 | 0 | 0  | 0 | 0 | 0 | 0 | 0 | 0  | 0 | 1  |   |
| Paludibacter_OTU#1036               | 0 | 0 | 0 | 0 | 0 | 0 | 1  | 0  | 0 | 0 | 0  | 0 | 0 | 0 | 0 | 1 | 0  | 1 | 0  | 4 |
| Paludibacter_OTU#1037               | 0 | 0 | 0 | 0 | 0 | 0 | 0  | 0  | 0 | 0 | 0  | 0 | 0 | 0 | 0 | 0 | 0  | 0 | 1  |   |
| Limibacter_OTU#1038                 | 2 | 0 | 1 | 4 | 2 | 0 | 2  | 2  | 0 | 0 | 0  | 0 | 0 | 0 | 0 | 0 | 0  | 1 | 0  | 1 |
| Proteiniphilum_OTU#1039             | 0 | 0 | 0 | 0 | 0 | 0 | 0  | 0  | 0 | 0 | 0  | 0 | 0 | 0 | 0 | 0 | 0  | 0 | 1  |   |
| Paludibacter_OTU#1040               | 0 | 0 | 0 | 0 | 0 | 0 | 0  | 0  | 0 | 0 | 0  | 0 | 0 | 0 | 0 | 0 | 0  | 0 | 1  | 1 |
| unclassified Bacteroidales_OTU#1041 | 0 | 0 | 0 | 0 | 0 | 0 | 0  | 0  | 0 | 0 | 0  | 0 | 0 | 1 | 0 | 0 | 0  | 1 | 1  | 1 |
| Paludibacter_OTU#1042               | 0 | 0 | 0 | 0 | 0 | 0 | 1  | 0  | 0 | 0 | 0  | 0 | 0 | 0 | 1 | 0 | 0  | 0 | 3  |   |
| Paludibacter_OTU#1043               | 0 | 0 | 0 | 0 | 0 | 0 | 0  | 0  | 0 | 0 | 4  | 4 | 4 | 3 | 3 | 1 | 17 | 2 | 11 |   |
| Rikenella_OTU#1044                  | 0 | 0 | 0 | 0 | 0 | 0 | 0  | 0  | 0 | 0 | 0  | 0 | 0 | 0 | 0 | 0 | 1  | 0 | 4  | 2 |

Supplementary Table 1



|                                     |    |    |    |    |    |   |    |    |   |   |   |    |    |    |    |    |         |    |    |    |
|-------------------------------------|----|----|----|----|----|---|----|----|---|---|---|----|----|----|----|----|---------|----|----|----|
| Rikenella_OTU#1045                  | 0  | 0  | 0  | 0  | 0  | 0 | 0  | 0  | 0 | 0 | 0 | 0  | 0  | 0  | 0  | 0  | 0       | 0  | 0  | 1  |
| Dorea_OTU#1046                      | 0  | 0  | 0  | 0  | 0  | 0 | 0  | 0  | 0 | 0 | 0 | 0  | 0  | 0  | 0  | 0  | 0       | 0  | 0  | 1  |
| Paludibacter_OTU#1047               | 0  | 0  | 0  | 0  | 0  | 0 | 0  | 0  | 0 | 0 | 0 | 2  | 0  | 0  | 2  | 0  | 0       | 1  | 1  | 1  |
| Paludibacter_OTU#1048               | 0  | 0  | 0  | 0  | 0  | 0 | 0  | 0  | 0 | 0 | 0 | 0  | 1  | 0  | 0  | 0  | 0       | 0  | 0  | 1  |
| Parvimonas_OTU#1049                 | 0  | 0  | 0  | 0  | 0  | 0 | 0  | 0  | 0 | 1 | 0 | 0  | 1  | 0  | 0  | 3  | 55<br>7 | 14 | 4  | 42 |
| Paludibacter_OTU#1050               | 0  | 0  | 0  | 1  | 0  | 0 | 2  | 2  | 0 | 0 | 0 | 0  | 1  | 0  | 0  | 0  | 2       | 4  | 2  | 4  |
| Rikenella_OTU#1051                  | 0  | 0  | 0  | 0  | 0  | 0 | 0  | 0  | 0 | 0 | 0 | 0  | 0  | 0  | 0  | 0  | 0       | 2  | 0  | 1  |
| Paludibacter_OTU#1052               | 0  | 0  | 0  | 0  | 0  | 0 | 0  | 0  | 0 | 0 | 0 | 0  | 1  | 0  | 0  | 0  | 0       | 0  | 0  | 1  |
| Paludibacter_OTU#1053               | 0  | 0  | 0  | 0  | 0  | 0 | 0  | 0  | 0 | 0 | 0 | 1  | 0  | 0  | 0  | 1  | 0       | 0  | 0  | 1  |
| unclassified Bacteroidales_OTU#1054 | 1  | 0  | 0  | 1  | 0  | 0 | 1  | 0  | 0 | 0 | 0 | 2  | 1  | 5  | 1  | 1  | 1       | 0  | 2  | 2  |
| Barnesiella_OTU#1055                | 1  | 30 | 0  | 0  | 5  | 0 | 13 | 2  | 0 | 0 | 0 | 17 | 47 | 45 | 31 | 24 | 10      | 18 | 17 | 19 |
| Paludibacter_OTU#1056               | 0  | 0  | 0  | 0  | 0  | 0 | 0  | 5  | 0 | 0 | 0 | 0  | 1  | 1  | 0  | 0  | 1       | 8  | 1  | 5  |
| Paludibacter_OTU#1057               | 0  | 0  | 0  | 0  | 0  | 0 | 0  | 0  | 0 | 0 | 0 | 0  | 0  | 0  | 0  | 0  | 0       | 0  | 0  | 1  |
| unclassified_OTU#1058               | 0  | 0  | 0  | 0  | 0  | 0 | 0  | 0  | 0 | 0 | 0 | 1  | 0  | 0  | 0  | 0  | 0       | 0  | 0  | 1  |
| Paludibacter_OTU#1059               | 0  | 0  | 0  | 0  | 0  | 0 | 1  | 0  | 0 | 0 | 0 | 8  | 8  | 6  | 15 | 11 | 2       | 4  | 1  | 2  |
| Paludibacter_OTU#1060               | 31 | 56 | 11 | 27 | 27 | 0 | 48 | 31 | 0 | 0 | 0 | 22 | 16 | 28 | 17 | 24 | 12      | 49 | 47 | 54 |
| Paludibacter_OTU#1061               | 0  | 0  | 0  | 0  | 0  | 0 | 0  | 0  | 0 | 0 | 0 | 0  | 0  | 0  | 0  | 0  | 0       | 0  | 0  | 1  |
| Anaerophaga_OTU#1062                | 0  | 1  | 0  | 0  | 0  | 0 | 0  | 0  | 0 | 0 | 0 | 1  | 0  | 0  | 1  | 0  | 0       | 0  | 0  | 2  |
| Asaccharobacter_OTU#1063            | 0  | 0  | 0  | 0  | 0  | 0 | 0  | 0  | 0 | 0 | 0 | 0  | 0  | 0  | 0  | 0  | 1       | 0  | 2  | 2  |
| Paludibacter_OTU#1064               | 0  | 1  | 0  | 0  | 0  | 0 | 0  | 0  | 0 | 0 | 0 | 0  | 0  | 0  | 0  | 1  | 0       | 0  | 3  | 2  |
| Paludibacter_OTU#1065               | 0  | 0  | 0  | 0  | 0  | 0 | 0  | 0  | 0 | 0 | 0 | 0  | 0  | 0  | 0  | 0  | 0       | 0  | 0  | 1  |
| Paludibacter_OTU#1066               | 0  | 0  | 0  | 0  | 0  | 0 | 0  | 0  | 0 | 0 | 0 | 0  | 3  | 1  | 2  | 1  | 0       | 5  | 1  | 5  |
| Thermonema_OTU#1067                 | 0  | 0  | 0  | 0  | 0  | 0 | 0  | 0  | 0 | 0 | 0 | 0  | 0  | 0  | 0  | 0  | 0       | 0  | 0  | 1  |
| Peptococcus_OTU#1068                | 0  | 0  | 0  | 0  | 0  | 0 | 0  | 0  | 0 | 0 | 0 | 0  | 0  | 0  | 0  | 0  | 0       | 0  | 0  | 1  |
| Paludibacter_OTU#1069               | 0  | 0  | 0  | 0  | 0  | 0 | 0  | 0  | 0 | 0 | 0 | 0  | 0  | 0  | 0  | 0  | 0       | 0  | 0  | 1  |
| Paludibacter_OTU#1070               | 0  | 0  | 0  | 0  | 0  | 0 | 0  | 1  | 0 | 0 | 0 | 4  | 8  | 6  | 5  | 2  | 0       | 4  | 4  | 4  |
| unclassified                        |    |    |    |    |    |   |    |    |   |   |   |    |    |    |    |    |         |    |    |    |
| Porphyromonadaceae_OTU#1071         | 0  | 0  | 0  | 0  | 0  | 0 | 1  | 0  | 0 | 0 | 0 | 1  | 0  | 1  | 0  | 0  | 1       | 1  | 0  | 1  |
| Barnesiella_OTU#1072                | 0  | 1  | 3  | 8  | 12 | 0 | 36 | 35 | 0 | 0 | 0 | 1  | 5  | 3  | 8  | 2  | 11      | 40 | 19 | 42 |
| Paludibacter_OTU#1073               | 0  | 0  | 0  | 0  | 0  | 0 | 1  | 1  | 0 | 0 | 0 | 0  | 0  | 0  | 0  | 0  | 0       | 3  | 0  | 2  |
| Paludibacter_OTU#1074               | 0  | 0  | 0  | 2  | 0  | 0 | 1  | 1  | 0 | 0 | 0 | 0  | 1  | 1  | 0  | 2  | 0       | 4  | 1  | 2  |
| Paludibacter_OTU#1075               | 2  | 3  | 1  | 1  | 3  | 0 | 15 | 19 | 0 | 0 | 0 | 19 | 26 | 36 | 20 | 27 | 9       | 57 | 11 | 46 |
| Tannerella_OTU#1076                 | 0  | 0  | 0  | 0  | 2  | 0 | 0  | 1  | 0 | 0 | 4 | 0  | 0  | 0  | 0  | 0  | 0       | 0  | 0  | 1  |

Supplementary Table 1

|                                     |    |    |    |    |    |   |    |    |    |   |    |    |    |    |    |    |    |    |    |    |
|-------------------------------------|----|----|----|----|----|---|----|----|----|---|----|----|----|----|----|----|----|----|----|----|
| Paludibacter_OTU#1077               | 23 | 47 | 1  | 2  | 2  | 0 | 48 | 10 | 0  | 0 | 0  | 22 | 54 | 64 | 60 | 63 | 16 | 58 | 81 | 47 |
| Paludibacter_OTU#1078               | 0  | 0  | 0  | 0  | 0  | 0 | 0  | 1  | 0  | 0 | 0  | 0  | 0  | 0  | 0  | 0  | 0  | 1  | 0  | 2  |
| Dorea_OTU#1079                      | 0  | 0  | 0  | 0  | 0  | 0 | 0  | 0  | 0  | 0 | 0  | 0  | 0  | 0  | 0  | 0  | 0  | 0  | 0  | 1  |
| Paludibacter_OTU#1080               | 0  | 0  | 0  | 0  | 0  | 0 | 0  | 0  | 0  | 0 | 0  | 0  | 0  | 0  | 0  | 0  | 0  | 1  | 1  | 1  |
| Barnesiella_OTU#1081                | 2  | 0  | 0  | 2  | 1  | 0 | 0  | 0  | 0  | 0 | 0  | 3  | 2  | 1  | 5  | 2  | 1  | 0  | 0  | 2  |
| Anaerophaga_OTU#1082                | 0  | 0  | 0  | 0  | 0  | 0 | 0  | 0  | 0  | 0 | 0  | 0  | 0  | 0  | 0  | 0  | 0  | 1  | 1  | 1  |
| Paludibacter_OTU#1083               | 4  | 12 | 9  | 4  | 10 | 2 | 9  | 0  | 10 | 2 | 14 | 0  | 5  | 7  | 3  | 5  | 3  | 22 | 24 | 8  |
| Paludibacter_OTU#1084               | 0  | 0  | 0  | 0  | 0  | 0 | 0  | 0  | 0  | 0 | 0  | 0  | 0  | 0  | 0  | 0  | 0  | 0  | 0  | 1  |
| Paludibacter_OTU#1085               | 0  | 0  | 0  | 0  | 0  | 0 | 0  | 0  | 0  | 0 | 0  | 1  | 0  | 0  | 0  | 0  | 0  | 0  | 0  | 1  |
| Dorea_OTU#1086                      | 0  | 0  | 0  | 0  | 0  | 0 | 0  | 0  | 0  | 0 | 0  | 0  | 0  | 0  | 0  | 0  | 0  | 0  | 0  | 2  |
| Paludibacter_OTU#1087               | 0  | 0  | 0  | 0  | 0  | 0 | 0  | 0  | 0  | 0 | 0  | 0  | 0  | 0  | 1  | 0  | 0  | 0  | 0  | 1  |
| Paludibacter_OTU#1088               | 0  | 0  | 0  | 0  | 0  | 0 | 0  | 0  | 0  | 0 | 8  | 4  | 7  | 10 | 8  | 11 | 0  | 0  | 4  | 3  |
| Rikenella_OTU#1089                  | 26 | 3  | 7  | 21 | 36 | 0 | 13 | 0  | 0  | 0 | 0  | 9  | 7  | 12 | 11 | 8  | 0  | 6  | 10 | 11 |
| Coprococcus_OTU#1090                | 0  | 0  | 0  | 0  | 0  | 0 | 0  | 0  | 0  | 0 | 0  | 0  | 0  | 0  | 0  | 0  | 0  | 0  | 0  | 1  |
| Paludibacter_OTU#1091               | 6  | 4  | 7  | 8  | 17 | 0 | 15 | 31 | 9  | 0 | 0  | 61 | 12 | 12 | 12 | 62 | 95 | 37 | 64 | 27 |
| Rikenella_OTU#1092                  | 24 | 4  | 12 | 20 | 32 | 0 | 18 | 3  | 0  | 0 | 1  | 31 | 21 | 36 | 49 | 33 | 10 | 32 | 24 | 35 |
| unclassified Bacteroidales_OTU#1093 | 0  | 0  | 0  | 0  | 0  | 0 | 0  | 0  | 0  | 0 | 0  | 0  | 0  | 0  | 0  | 0  | 0  | 0  | 0  | 2  |
| Paludibacter_OTU#1094               | 0  | 0  | 0  | 0  | 0  | 0 | 0  | 0  | 0  | 0 | 0  | 1  | 0  | 0  | 0  | 0  | 0  | 0  | 0  | 1  |
| Paludibacter_OTU#1095               | 0  | 0  | 0  | 0  | 1  | 0 | 0  | 0  | 0  | 0 | 0  | 1  | 1  | 0  | 1  | 0  | 0  | 0  | 1  | 1  |
| unclassified Bacteroidetes_OTU#1096 | 0  | 0  | 0  | 0  | 0  | 0 | 0  | 0  | 0  | 0 | 0  | 0  | 1  | 4  | 1  | 2  | 0  | 1  | 0  | 4  |
| Limibacter_OTU#1097                 | 0  | 0  | 0  | 0  | 0  | 1 | 0  | 0  | 0  | 0 | 0  | 0  | 0  | 0  | 0  | 0  | 0  | 0  | 0  | 0  |
| Robinsoniella_OTU#1098              | 0  | 0  | 0  | 0  | 0  | 1 | 0  | 0  | 0  | 0 | 3  | 0  | 0  | 0  | 0  | 0  | 0  | 0  | 0  | 0  |
| Allobaculum_OTU#1099                | 0  | 0  | 0  | 0  | 0  | 1 | 0  | 0  | 0  | 0 | 0  | 0  | 0  | 0  | 0  | 0  | 0  | 0  | 0  | 0  |
| Anaerophaga_OTU#1100                | 0  | 0  | 0  | 0  | 0  | 1 | 0  | 0  | 0  | 0 | 0  | 0  | 0  | 0  | 0  | 0  | 0  | 0  | 0  | 0  |
| Anaerophaga_OTU#1101                | 0  | 0  | 0  | 0  | 0  | 1 | 0  | 0  | 0  | 0 | 0  | 0  | 0  | 0  | 0  | 0  | 0  | 0  | 0  | 0  |
| Paludibacter_OTU#1102               | 0  | 0  | 0  | 0  | 0  | 1 | 1  | 2  | 0  | 0 | 5  | 1  | 0  | 0  | 0  | 0  | 1  | 2  | 1  | 1  |
| Limibacter_OTU#1103                 | 1  | 0  | 0  | 0  | 0  | 1 | 0  | 0  | 0  | 0 | 0  | 0  | 0  | 0  | 0  | 0  | 0  | 0  | 0  | 0  |
| Paludibacter_OTU#1104               | 0  | 0  | 0  | 0  | 0  | 1 | 0  | 0  | 0  | 0 | 0  | 0  | 0  | 0  | 0  | 0  | 0  | 0  | 0  | 0  |
| Rikenella_OTU#1105                  | 4  | 3  | 1  | 0  | 3  | 2 | 31 | 34 | 0  | 0 | 1  | 6  | 0  | 8  | 6  | 7  | 5  | 24 | 9  | 11 |
| Paludibacter_OTU#1106               | 0  | 0  | 0  | 0  | 0  | 1 | 0  | 0  | 0  | 0 | 0  | 0  | 0  | 0  | 0  | 0  | 0  | 0  | 0  | 0  |
| Limibacter_OTU#1107                 | 0  | 0  | 0  | 0  | 0  | 3 | 0  | 0  | 0  | 0 | 0  | 0  | 0  | 0  | 0  | 0  | 0  | 0  | 0  | 0  |
| Paludibacter_OTU#1108               | 0  | 0  | 0  | 0  | 0  | 1 | 0  | 0  | 0  | 0 | 0  | 0  | 0  | 0  | 0  | 0  | 0  | 0  | 0  | 0  |
| Tannerella_OTU#1109                 | 0  | 0  | 0  | 0  | 0  | 1 | 0  | 0  | 0  | 0 | 0  | 0  | 0  | 0  | 0  | 0  | 0  | 0  | 0  | 0  |

Supplementary Table 1

|                        |   |   |   |   |    |    |   |   |   |   |   |   |   |   |    |   |    |   |    |    |
|------------------------|---|---|---|---|----|----|---|---|---|---|---|---|---|---|----|---|----|---|----|----|
| Limibacter_OTU#1110    | 0 | 0 | 0 | 0 | 0  | 1  | 0 | 0 | 0 | 0 | 0 | 0 | 0 | 0 | 0  | 0 | 0  | 0 | 0  | 0  |
| Paludibacter_OTU#1111  | 0 | 0 | 0 | 0 | 0  | 1  | 0 | 0 | 0 | 0 | 0 | 0 | 0 | 0 | 0  | 0 | 0  | 0 | 0  | 0  |
| Lawsonia_OTU#1112      | 0 | 0 | 0 | 0 | 0  | 1  | 0 | 0 | 0 | 0 | 0 | 0 | 0 | 0 | 0  | 0 | 0  | 0 | 0  | 0  |
| Paludibacter_OTU#1113  | 0 | 0 | 1 | 0 | 0  | 1  | 0 | 0 | 0 | 0 | 0 | 0 | 0 | 0 | 0  | 0 | 0  | 0 | 0  | 0  |
| Allobaculum_OTU#1114   | 0 | 0 | 0 | 0 | 0  | 1  | 0 | 0 | 0 | 0 | 0 | 0 | 0 | 0 | 0  | 0 | 0  | 0 | 0  | 0  |
| Limibacter_OTU#1115    | 0 | 0 | 0 | 0 | 0  | 1  | 0 | 0 | 0 | 0 | 0 | 0 | 0 | 0 | 0  | 0 | 0  | 0 | 0  | 0  |
| Lactobacillus_OTU#1116 | 0 | 0 | 0 | 0 | 0  | 1  | 0 | 0 | 0 | 0 | 0 | 0 | 0 | 0 | 0  | 0 | 0  | 0 | 0  | 0  |
| Allobaculum_OTU#1117   | 0 | 0 | 0 | 0 | 0  | 1  | 0 | 0 | 0 | 0 | 0 | 0 | 0 | 0 | 0  | 0 | 0  | 0 | 0  | 0  |
| Allobaculum_OTU#1118   | 0 | 0 | 0 | 0 | 0  | 2  | 0 | 0 | 0 | 0 | 0 | 0 | 0 | 0 | 0  | 0 | 0  | 0 | 0  | 0  |
| Rikenella_OTU#1119     | 0 | 0 | 1 | 0 | 1  | 1  | 0 | 0 | 0 | 0 | 0 | 0 | 0 | 0 | 0  | 0 | 0  | 0 | 0  | 0  |
| Rikenella_OTU#1120     | 0 | 0 | 0 | 0 | 0  | 1  | 0 | 0 | 0 | 0 | 0 | 0 | 0 | 0 | 0  | 0 | 0  | 0 | 0  | 0  |
| Blautia_OTU#1121       | 0 | 0 | 0 | 0 | 0  | 1  | 0 | 0 | 0 | 0 | 0 | 0 | 0 | 0 | 0  | 0 | 0  | 0 | 0  | 0  |
| Allobaculum_OTU#1122   | 0 | 0 | 0 | 0 | 0  | 1  | 0 | 0 | 0 | 0 | 0 | 0 | 0 | 0 | 0  | 0 | 0  | 0 | 0  | 0  |
| Limibacter_OTU#1123    | 0 | 0 | 0 | 0 | 0  | 1  | 0 | 0 | 0 | 0 | 0 | 0 | 0 | 0 | 0  | 0 | 0  | 0 | 0  | 0  |
| Limibacter_OTU#1124    | 0 | 0 | 0 | 0 | 0  | 1  | 0 | 0 | 0 | 0 | 0 | 0 | 0 | 0 | 0  | 0 | 0  | 0 | 0  | 0  |
| Limibacter_OTU#1125    | 0 | 0 | 0 | 0 | 0  | 1  | 0 | 0 | 0 | 0 | 0 | 0 | 0 | 0 | 0  | 0 | 0  | 0 | 0  | 0  |
| Paludibacter_OTU#1126  | 0 | 0 | 0 | 0 | 0  | 2  | 0 | 0 | 0 | 0 | 0 | 0 | 0 | 0 | 0  | 0 | 0  | 0 | 0  | 0  |
| Limibacter_OTU#1127    | 0 | 0 | 0 | 0 | 0  | 1  | 0 | 0 | 0 | 0 | 0 | 0 | 0 | 0 | 0  | 0 | 0  | 0 | 0  | 0  |
| Allobaculum_OTU#1128   | 0 | 0 | 0 | 0 | 0  | 1  | 0 | 0 | 0 | 0 | 0 | 0 | 0 | 0 | 0  | 0 | 0  | 0 | 0  | 0  |
| Paludibacter_OTU#1129  | 0 | 0 | 0 | 0 | 0  | 1  | 0 | 0 | 0 | 0 | 0 | 0 | 0 | 0 | 0  | 0 | 0  | 0 | 0  | 0  |
| Limibacter_OTU#1130    | 1 | 1 | 1 | 3 | 1  | 1  | 0 | 0 | 0 | 0 | 0 | 0 | 0 | 0 | 0  | 0 | 0  | 0 | 0  | 0  |
| Lactobacillus_OTU#1131 | 0 | 0 | 0 | 0 | 0  | 1  | 0 | 0 | 0 | 0 | 0 | 0 | 0 | 0 | 0  | 0 | 0  | 0 | 0  | 0  |
| Anaerophaga_OTU#1132   | 0 | 0 | 0 | 0 | 0  | 5  | 0 | 0 | 0 | 0 | 0 | 0 | 0 | 0 | 0  | 0 | 0  | 0 | 0  | 0  |
| Limibacter_OTU#1133    | 0 | 0 | 0 | 0 | 0  | 2  | 0 | 0 | 0 | 0 | 0 | 0 | 0 | 0 | 0  | 0 | 0  | 0 | 0  | 0  |
| Lactobacillus_OTU#1134 | 1 | 1 | 2 | 0 | 30 | 78 | 0 | 0 | 0 | 0 | 0 | 4 | 9 | 3 | 13 | 3 | 13 | 3 | 37 | 72 |
| Limibacter_OTU#1135    | 0 | 0 | 0 | 0 | 0  | 1  | 0 | 0 | 0 | 0 | 0 | 0 | 0 | 0 | 0  | 0 | 0  | 0 | 0  | 0  |
| Rikenella_OTU#1136     | 0 | 1 | 1 | 0 | 0  | 2  | 0 | 0 | 0 | 0 | 0 | 0 | 0 | 0 | 0  | 0 | 0  | 0 | 0  | 0  |
| Anaerophaga_OTU#1137   | 0 | 0 | 0 | 0 | 0  | 1  | 0 | 0 | 0 | 0 | 0 | 0 | 0 | 0 | 0  | 0 | 0  | 0 | 0  | 0  |
| Limibacter_OTU#1138    | 0 | 0 | 0 | 0 | 0  | 1  | 0 | 0 | 0 | 0 | 0 | 0 | 0 | 0 | 0  | 0 | 0  | 0 | 0  | 0  |
| Limibacter_OTU#1139    | 0 | 0 | 0 | 0 | 0  | 2  | 0 | 0 | 0 | 0 | 0 | 0 | 0 | 0 | 0  | 0 | 0  | 0 | 0  | 0  |
| Anaerophaga_OTU#1140   | 0 | 2 | 3 | 0 | 1  | 6  | 0 | 0 | 0 | 0 | 0 | 0 | 0 | 0 | 0  | 0 | 0  | 0 | 0  | 0  |
| Limibacter_OTU#1141    | 1 | 0 | 0 | 0 | 0  | 1  | 0 | 0 | 0 | 0 | 0 | 0 | 0 | 0 | 0  | 0 | 0  | 0 | 0  | 0  |
| Allobaculum_OTU#1142   | 0 | 0 | 0 | 0 | 0  | 6  | 0 | 0 | 0 | 0 | 0 | 0 | 0 | 0 | 0  | 0 | 0  | 0 | 0  | 0  |

Supplementary Table 1

|                                             |         |         |         |         |         |         |    |    |   |   |    |   |   |   |   |   |    |    |    |    |
|---------------------------------------------|---------|---------|---------|---------|---------|---------|----|----|---|---|----|---|---|---|---|---|----|----|----|----|
| Paludibacter_OTU#1143                       | 0       | 0       | 0       | 0       | 0       | 1       | 0  | 0  | 0 | 0 | 0  | 0 | 0 | 0 | 0 | 0 | 0  | 0  | 0  | 0  |
| Allobaculum_OTU#1144                        | 0       | 0       | 0       | 0       | 0       | 3       | 0  | 0  | 0 | 0 | 0  | 0 | 0 | 0 | 0 | 0 | 0  | 0  | 0  | 0  |
| Proteiniphilum_OTU#1145                     | 0       | 0       | 0       | 0       | 0       | 1       | 0  | 0  | 0 | 0 | 0  | 0 | 0 | 0 | 0 | 0 | 0  | 0  | 0  | 0  |
| Limibacter_OTU#1146                         | 0       | 0       | 0       | 0       | 0       | 5       | 0  | 0  | 0 | 0 | 0  | 0 | 0 | 0 | 0 | 0 | 0  | 0  | 0  | 0  |
| Paludibacter_OTU#1147                       | 2       | 0       | 0       | 0       | 0       | 2       | 0  | 0  | 0 | 0 | 0  | 0 | 0 | 0 | 0 | 0 | 0  | 0  | 0  | 0  |
| Limibacter_OTU#1148                         | 0       | 0       | 1       | 0       | 0       | 1       | 0  | 0  | 0 | 0 | 0  | 0 | 0 | 0 | 0 | 0 | 0  | 0  | 0  | 0  |
| Allobaculum_OTU#1149                        | 0       | 0       | 0       | 0       | 0       | 1       | 0  | 0  | 0 | 0 | 0  | 0 | 0 | 0 | 0 | 0 | 0  | 0  | 0  | 0  |
| Anaerophaga_OTU#1150                        | 1       | 0       | 8       | 0       | 4       | 67      | 0  | 0  | 0 | 0 | 0  | 0 | 0 | 0 | 0 | 0 | 0  | 0  | 0  | 0  |
| Limibacter_OTU#1151                         | 0       | 1       | 0       | 0       | 0       | 1       | 0  | 0  | 0 | 0 | 0  | 0 | 0 | 0 | 0 | 0 | 0  | 0  | 0  | 0  |
| Anaerophaga_OTU#1152                        | 0       | 0       | 0       | 0       | 0       | 2       | 0  | 0  | 0 | 0 | 0  | 0 | 0 | 0 | 0 | 0 | 0  | 0  | 0  | 0  |
| Paludibacter_OTU#1153                       | 0       | 0       | 0       | 0       | 0       | 1       | 0  | 0  | 0 | 0 | 0  | 0 | 0 | 0 | 0 | 0 | 0  | 0  | 0  | 0  |
| Rikenella_OTU#1154                          | 0       | 0       | 1       | 0       | 0       | 4       | 0  | 0  | 0 | 0 | 0  | 0 | 0 | 0 | 0 | 0 | 0  | 0  | 0  | 0  |
| unclassified<br>Porphyromonadaceae_OTU#1155 | 0       | 0       | 1       | 0       | 0       | 11      | 0  | 0  | 0 | 0 | 0  | 0 | 0 | 0 | 0 | 0 | 0  | 0  | 0  | 0  |
| Allobaculum_OTU#1156                        | 2       | 0       | 0       | 0       | 0       | 2       | 0  | 0  | 0 | 0 | 0  | 0 | 0 | 0 | 0 | 0 | 0  | 0  | 0  | 0  |
| Rikenella_OTU#1157                          | 0       | 0       | 0       | 0       | 0       | 1       | 0  | 0  | 0 | 0 | 0  | 0 | 0 | 0 | 0 | 0 | 0  | 0  | 0  | 0  |
| Anaerophaga_OTU#1158                        | 0       | 0       | 0       | 0       | 3       | 5       | 0  | 0  | 0 | 0 | 0  | 0 | 0 | 0 | 0 | 0 | 0  | 0  | 0  | 0  |
| Anaerophaga_OTU#1159                        | 0       | 2       | 19      | 4       | 19      | 23<br>6 | 0  | 0  | 0 | 0 | 0  | 0 | 0 | 0 | 0 | 0 | 0  | 0  | 0  | 0  |
| Limibacter_OTU#1160                         | 0       | 0       | 0       | 0       | 0       | 1       | 0  | 0  | 0 | 0 | 0  | 0 | 0 | 0 | 0 | 0 | 0  | 0  | 0  | 0  |
| Lactobacillus_OTU#1161                      | 0       | 0       | 0       | 1       | 1       | 2       | 0  | 0  | 0 | 0 | 0  | 0 | 1 | 1 | 5 | 0 | 86 | 18 | 60 | 71 |
| Parasutterella_OTU#1162                     | 0       | 0       | 0       | 0       | 0       | 1       | 0  | 0  | 0 | 0 | 0  | 0 | 0 | 0 | 0 | 0 | 0  | 0  | 0  | 0  |
| unclassified Bacteroidales_OTU#1163         | 1       | 0       | 1       | 0       | 0       | 7       | 0  | 0  | 0 | 0 | 0  | 0 | 0 | 0 | 0 | 0 | 0  | 0  | 0  | 0  |
| Limibacter_OTU#1164                         | 29<br>3 | 14<br>7 | 14<br>5 | 13<br>0 | 21<br>5 | 26<br>8 | 54 | 30 | 0 | 0 | 0  | 0 | 0 | 0 | 0 | 0 | 0  | 0  | 0  | 0  |
| Allobaculum_OTU#1165                        | 4       | 5       | 0       | 0       | 0       | 10<br>3 | 0  | 0  | 1 | 0 | 12 | 0 | 0 | 0 | 0 | 0 | 0  | 0  | 0  | 0  |
| Limibacter_OTU#1166                         | 1       | 1       | 1       | 0       | 0       | 1       | 0  | 0  | 0 | 0 | 0  | 1 | 0 | 0 | 0 | 0 | 0  | 0  | 0  | 0  |
| Paludibacter_OTU#1167                       | 0       | 0       | 0       | 0       | 0       | 0       | 0  | 0  | 1 | 0 | 0  | 0 | 0 | 0 | 0 | 0 | 0  | 0  | 0  | 0  |
| Barnesiella_OTU#1168                        | 0       | 0       | 0       | 0       | 0       | 0       | 0  | 0  | 1 | 0 | 0  | 0 | 0 | 0 | 0 | 0 | 0  | 0  | 0  | 0  |
| Alistipes_OTU#1169                          | 0       | 0       | 0       | 0       | 0       | 0       | 0  | 0  | 1 | 0 | 0  | 0 | 0 | 0 | 0 | 0 | 0  | 0  | 0  | 0  |
| Roseburia_OTU#1170                          | 0       | 0       | 0       | 0       | 0       | 0       | 0  | 0  | 1 | 0 | 0  | 0 | 0 | 0 | 0 | 0 | 0  | 0  | 0  | 0  |
| Ureaplasma_OTU#1171                         | 0       | 0       | 0       | 0       | 0       | 0       | 0  | 0  | 1 | 0 | 0  | 0 | 0 | 0 | 0 | 0 | 0  | 0  | 0  | 0  |
| Parasutterella_OTU#1172                     | 0       | 0       | 0       | 0       | 0       | 0       | 0  | 0  | 1 | 0 | 0  | 0 | 0 | 0 | 0 | 0 | 0  | 0  | 0  | 0  |

Supplementary Table 1

|                               |   |    |   |   |   |    |    |    |    |   |    |   |   |   |   |   |    |   |   |   |   |   |
|-------------------------------|---|----|---|---|---|----|----|----|----|---|----|---|---|---|---|---|----|---|---|---|---|---|
| Mucispirillum_OTU#1173        | 0 | 0  | 0 | 0 | 0 | 0  | 0  | 0  | 1  | 0 | 0  | 0 | 0 | 0 | 0 | 0 | 0  | 0 | 0 | 0 |   |   |
| Barnesiella_OTU#1174          | 0 | 0  | 0 | 0 | 0 | 0  | 0  | 0  | 1  | 0 | 0  | 0 | 0 | 0 | 0 | 0 | 0  | 0 | 0 | 0 |   |   |
| Lactobacillus_OTU#1175        | 0 | 0  | 0 | 0 | 0 | 0  | 0  | 0  | 1  | 0 | 0  | 0 | 0 | 0 | 0 | 0 | 0  | 0 | 0 | 0 |   |   |
| Paludibacter_OTU#1176         | 0 | 0  | 0 | 0 | 0 | 0  | 0  | 0  | 1  | 0 | 0  | 0 | 0 | 0 | 0 | 0 | 0  | 0 | 0 | 0 |   |   |
| Parasutterella_OTU#1177       | 2 | 0  | 0 | 0 | 0 | 0  | 0  | 0  | 3  | 0 | 1  | 0 | 0 | 0 | 0 | 0 | 0  | 0 | 0 | 0 |   |   |
| Tannerella_OTU#1178           | 0 | 0  | 0 | 0 | 0 | 0  | 0  | 0  | 1  | 0 | 0  | 0 | 0 | 0 | 0 | 0 | 0  | 0 | 0 | 0 |   |   |
| Sporacetigenium_OTU#1179      | 0 | 0  | 0 | 0 | 0 | 0  | 0  | 0  | 8  | 3 | 20 | 0 | 0 | 0 | 0 | 0 | 0  | 0 | 0 | 0 |   |   |
| Parabacteroides_OTU#1180      | 0 | 0  | 0 | 0 | 0 | 0  | 0  | 0  | 1  | 1 | 0  | 0 | 0 | 0 | 0 | 0 | 0  | 0 | 0 | 0 |   |   |
| Bacteroides_OTU#1181          | 0 | 0  | 0 | 0 | 0 | 0  | 0  | 0  | 1  | 0 | 1  | 0 | 0 | 0 | 0 | 0 | 0  | 0 | 0 | 0 |   |   |
| Parabacteroides_OTU#1182      | 0 | 0  | 0 | 0 | 0 | 0  | 0  | 0  | 2  | 0 | 2  | 0 | 0 | 0 | 0 | 0 | 0  | 0 | 0 | 0 |   |   |
| Paludibacter_OTU#1183         | 0 | 0  | 0 | 0 | 0 | 0  | 0  | 0  | 1  | 0 | 0  | 0 | 0 | 0 | 0 | 0 | 0  | 0 | 0 | 0 |   |   |
| Tannerella_OTU#1184           | 0 | 0  | 0 | 0 | 0 | 0  | 0  | 0  | 1  | 0 | 0  | 0 | 0 | 0 | 0 | 0 | 0  | 0 | 0 | 0 |   |   |
| Parabacteroides_OTU#1185      | 0 | 0  | 0 | 0 | 0 | 0  | 0  | 0  | 1  | 0 | 0  | 0 | 0 | 0 | 0 | 0 | 0  | 0 | 0 | 0 |   |   |
| Paludibacter_OTU#1186         | 0 | 0  | 0 | 0 | 1 | 0  | 0  | 0  | 2  | 0 | 0  | 0 | 0 | 0 | 0 | 0 | 0  | 0 | 0 | 0 |   |   |
| Paludibacter_OTU#1187         | 0 | 0  | 0 | 0 | 0 | 0  | 0  | 0  | 1  | 0 | 0  | 0 | 0 | 0 | 0 | 0 | 0  | 0 | 0 | 0 |   |   |
| Paludibacter_OTU#1188         | 0 | 2  | 0 | 0 | 0 | 0  | 0  | 0  | 3  | 0 | 1  | 0 | 0 | 0 | 0 | 0 | 0  | 3 | 1 | 0 |   |   |
| Barnesiella_OTU#1189          | 0 | 0  | 0 | 0 | 0 | 0  | 0  | 0  | 4  | 0 | 1  | 0 | 0 | 0 | 0 | 0 | 0  | 0 | 0 | 0 |   |   |
| Lactobacillus_OTU#1190        | 0 | 12 | 0 | 0 | 1 | 65 | 26 | 10 | 27 | 8 | 2  | 2 | 0 | 4 | 3 | 2 | 12 | 3 | 1 | 0 | 0 | 3 |
| Paludibacter_OTU#1191         | 0 | 0  | 0 | 0 | 0 | 0  | 0  | 0  | 1  | 0 | 0  | 0 | 0 | 0 | 0 | 0 | 0  | 0 | 0 | 0 | 0 | 0 |
| Escherichia/Shigella_OTU#1192 | 0 | 0  | 0 | 0 | 0 | 0  | 0  | 0  | 0  | 1 | 0  | 0 | 0 | 0 | 0 | 0 | 0  | 0 | 0 | 0 | 0 | 0 |
| Paludibacter_OTU#1193         | 0 | 0  | 0 | 0 | 0 | 0  | 0  | 0  | 1  | 1 | 0  | 0 | 0 | 0 | 0 | 0 | 0  | 0 | 0 | 0 | 0 | 0 |
| Pseudozobellia_OTU#1194       | 0 | 0  | 0 | 0 | 0 | 0  | 0  | 0  | 0  | 1 | 0  | 0 | 0 | 0 | 0 | 0 | 0  | 0 | 0 | 0 | 0 | 0 |
| Parabacteroides_OTU#1195      | 0 | 0  | 0 | 0 | 0 | 0  | 0  | 0  | 0  | 1 | 0  | 0 | 0 | 0 | 0 | 0 | 0  | 0 | 0 | 0 | 0 | 0 |
| Paludibacter_OTU#1196         | 0 | 0  | 0 | 1 | 1 | 0  | 0  | 0  | 0  | 3 | 0  | 0 | 0 | 0 | 0 | 0 | 0  | 0 | 0 | 0 | 0 | 0 |
| Paludibacter_OTU#1197         | 0 | 0  | 0 | 0 | 0 | 0  | 0  | 0  | 0  | 1 | 0  | 0 | 0 | 0 | 0 | 0 | 0  | 0 | 0 | 0 | 0 | 0 |
| Anaerostipes_OTU#1198         | 0 | 0  | 0 | 0 | 0 | 0  | 0  | 0  | 1  | 2 | 0  | 0 | 0 | 0 | 0 | 0 | 0  | 0 | 0 | 0 | 0 | 0 |
| Bacteroides_OTU#1199          | 0 | 0  | 0 | 0 | 0 | 0  | 0  | 0  | 0  | 1 | 0  | 0 | 0 | 0 | 0 | 0 | 0  | 0 | 0 | 0 | 0 | 0 |
| Parasutterella_OTU#1200       | 0 | 0  | 0 | 0 | 0 | 0  | 0  | 0  | 0  | 1 | 0  | 0 | 0 | 0 | 0 | 0 | 0  | 0 | 0 | 0 | 0 | 0 |
| Paludibacter_OTU#1201         | 0 | 0  | 0 | 0 | 0 | 0  | 0  | 0  | 0  | 1 | 0  | 0 | 0 | 0 | 0 | 0 | 0  | 0 | 0 | 0 | 0 | 0 |
| Parasutterella_OTU#1202       | 0 | 0  | 0 | 0 | 0 | 0  | 0  | 0  | 0  | 1 | 0  | 0 | 0 | 0 | 0 | 0 | 0  | 0 | 0 | 0 | 0 | 0 |
| Bacteroides_OTU#1203          | 0 | 0  | 0 | 0 | 0 | 0  | 0  | 0  | 2  | 5 | 13 | 0 | 0 | 0 | 0 | 0 | 0  | 0 | 0 | 0 | 0 | 0 |
| Paludibacter_OTU#1204         | 0 | 0  | 0 | 0 | 0 | 1  | 0  | 0  | 0  | 1 | 0  | 1 | 4 | 2 | 6 | 5 | 0  | 0 | 0 | 1 | 0 | 0 |
| Parasutterella_OTU#1205       | 0 | 0  | 0 | 0 | 0 | 0  | 0  | 0  | 0  | 1 | 0  | 0 | 0 | 0 | 0 | 0 | 0  | 0 | 0 | 0 | 0 | 0 |

Supplementary Table 1

|                               |    |    |   |    |    |    |    |    |    |    |    |    |    |    |    |    |    |    |   |    |
|-------------------------------|----|----|---|----|----|----|----|----|----|----|----|----|----|----|----|----|----|----|---|----|
| Paludibacter_OTU#1206         | 0  | 0  | 0 | 0  | 0  | 0  | 0  | 0  | 0  | 1  | 0  | 1  | 2  | 0  | 0  | 0  | 0  | 0  | 0 | 0  |
| Bacteroides_OTU#1207          | 0  | 0  | 0 | 0  | 0  | 0  | 0  | 5  | 0  | 2  | 3  | 0  | 0  | 0  | 0  | 0  | 0  | 0  | 0 | 0  |
| Barnesiella_OTU#1208          | 2  | 0  | 2 | 4  | 5  | 1  | 2  | 1  | 0  | 4  | 8  | 0  | 0  | 0  | 0  | 0  | 0  | 0  | 0 | 0  |
| Paludibacter_OTU#1209         | 0  | 0  | 0 | 0  | 0  | 0  | 0  | 0  | 0  | 1  | 0  | 0  | 0  | 0  | 0  | 0  | 0  | 0  | 0 | 0  |
| Parasutterella_OTU#1210       | 0  | 0  | 1 | 0  | 1  | 1  | 0  | 0  | 5  | 1  | 3  | 0  | 0  | 0  | 0  | 0  | 0  | 0  | 0 | 0  |
| Anaerostipes_OTU#1211         | 0  | 0  | 0 | 0  | 0  | 0  | 0  | 0  | 2  | 10 | 4  | 0  | 0  | 0  | 0  | 0  | 0  | 0  | 0 | 0  |
| Ureaplasma_OTU#1212           | 2  | 13 | 0 | 1  | 15 | 0  | 83 | 37 | 24 | 6  | 16 | 13 | 0  | 0  | 0  | 0  | 0  | 0  | 0 | 0  |
| Paludibacter_OTU#1213         | 0  | 1  | 0 | 0  | 0  | 0  | 1  | 1  | 0  | 1  | 9  | 1  | 1  | 2  | 0  | 0  | 1  | 1  | 2 | 1  |
| Helicobacter_OTU#1214         | 0  | 0  | 1 | 0  | 0  | 2  | 0  | 0  | 0  | 2  | 1  | 0  | 0  | 0  | 0  | 0  | 0  | 0  | 0 | 0  |
| Bacteroides_OTU#1215          | 0  | 0  | 0 | 0  | 0  | 1  | 0  | 2  | 15 | 6  | 3  | 0  | 0  | 0  | 0  | 0  | 0  | 0  | 0 | 0  |
| Akkermansia_OTU#1216          | 0  | 0  | 0 | 0  | 0  | 0  | 0  | 0  | 1  | 12 | 0  | 0  | 0  | 0  | 0  | 0  | 0  | 0  | 0 | 0  |
| Parasutterella_OTU#1217       | 0  | 0  | 0 | 0  | 0  | 0  | 0  | 0  | 1  | 1  | 2  | 0  | 0  | 0  | 0  | 0  | 0  | 0  | 0 | 0  |
| Paludibacter_OTU#1218         | 0  | 0  | 0 | 0  | 0  | 0  | 0  | 0  | 0  | 1  | 0  | 0  | 0  | 0  | 0  | 0  | 0  | 0  | 0 | 0  |
| Paraprevotella_OTU#1219       | 0  | 0  | 0 | 0  | 0  | 0  | 0  | 0  | 0  | 1  | 2  | 0  | 0  | 0  | 0  | 0  | 0  | 0  | 0 | 0  |
| Enterobacter_OTU#1220         | 0  | 0  | 6 | 0  | 0  | 0  | 0  | 0  | 1  | 19 | 0  | 1  | 0  | 0  | 0  | 0  | 0  | 0  | 0 | 0  |
| Paludibacter_OTU#1221         | 1  | 26 | 0 | 0  | 2  | 0  | 0  | 0  | 20 | 2  | 55 | 30 | 25 | 23 | 11 | 30 | 31 | 0  | 0 | 2  |
| Parasutterella_OTU#1222       | 0  | 0  | 0 | 0  | 0  | 0  | 0  | 0  | 0  | 2  | 0  | 0  | 0  | 0  | 0  | 0  | 0  | 0  | 0 | 0  |
| Escherichia/Shigella_OTU#1223 | 0  | 0  | 0 | 0  | 0  | 0  | 0  | 0  | 0  | 1  | 0  | 0  | 0  | 0  | 0  | 0  | 0  | 0  | 0 | 0  |
| Pseudozobellia_OTU#1224       | 0  | 0  | 0 | 0  | 0  | 0  | 0  | 0  | 0  | 1  | 0  | 0  | 0  | 0  | 0  | 0  | 0  | 0  | 0 | 0  |
| Roseburia_OTU#1225            | 0  | 0  | 0 | 0  | 0  | 1  | 0  | 0  | 53 | 74 | 28 | 0  | 0  | 0  | 0  | 0  | 0  | 0  | 0 | 0  |
| Barnesiella_OTU#1226          | 2  | 7  | 4 | 12 | 15 | 0  | 5  | 1  | 0  | 3  | 4  | 2  | 3  | 7  | 0  | 2  | 0  | 0  | 4 | 5  |
| Lawsonia_OTU#1227             | 1  | 0  | 0 | 0  | 1  | 1  | 1  | 2  | 0  | 4  | 0  | 0  | 0  | 0  | 0  | 0  | 0  | 0  | 0 | 0  |
| Parasutterella_OTU#1228       | 8  | 0  | 6 | 10 | 7  | 34 | 2  | 1  | 12 | 50 | 44 | 0  | 0  | 0  | 0  | 0  | 0  | 0  | 0 | 0  |
| Paludibacter_OTU#1229         | 0  | 0  | 0 | 0  | 0  | 0  | 0  | 0  | 0  | 1  | 0  | 0  | 0  | 0  | 0  | 0  | 0  | 0  | 0 | 0  |
| Tannerella_OTU#1230           | 2  | 34 | 9 | 10 | 53 | 8  | 23 | 25 | 4  | 59 | 14 | 2  | 3  | 8  | 2  | 5  | 6  | 2  | 9 | 4  |
| Parasutterella_OTU#1231       | 44 | 11 | 1 | 13 | 27 | 56 | 3  | 13 | 5  | 45 | 20 | 6  | 7  | 49 | 64 | 68 | 49 | 66 | 7 | 38 |
| Parasutterella_OTU#1232       | 0  | 0  | 0 | 0  | 0  | 0  | 0  | 0  | 0  | 4  | 0  | 0  | 0  | 0  | 0  | 0  | 0  | 0  | 0 | 0  |

Supplementary Table 1

## Supplementary Table 2. SIMPER analysis of *Ace2<sup>+y</sup>* and *Ace2<sup>-y</sup>* mice with or without di-peptidic tryptophan supplemented diet.

SIMPER analysis was performed to detect OTUs contributing to the dissimilarities in ileocaecal microbial communities related to host genotype and di-peptidic tryptophan (Trp+) treatments. All significant OTUs are ranked according to their contribution. Average abundance of OTUs in each treatment/genotype group is shown as percentages. Contribution of each OTU to the overall community is also given in %. Bray Curtis dissimilar measures were used to perform the analyses.

| OTUs                               | ACE 2 <sup>-y</sup> | ACE 2 <sup>-y</sup> + Trp+ | ACE 2 <sup>+y</sup> | ACE 2 <sup>+y</sup> + Trp+ | Contribution | Cumulative % |
|------------------------------------|---------------------|----------------------------|---------------------|----------------------------|--------------|--------------|
| Allobaculum_OTU#288                | 26.1                | 0.04                       | 0                   | 0                          | 7.365        | 8.908        |
| Paludibacter_OTU#1091              | 0.7                 | 9.4                        | 10.9                | 17.5                       | 6.351        | 16.59        |
| Limibacter_OTU#1164                | 20                  | 1.68                       | 0                   | 0                          | 5.713        | 23.5         |
| Parasutterella_OTU#1228            | 1.08                | 21.5                       | 0                   | 0                          | 5.586        | 30.26        |
| Parvimonas_OTU#1049                | 0                   | 0.02                       | 0.025               | 20.6                       | 5.188        | 36.53        |
| Allobaculum_OTU#835                | 0                   | 0                          | 17.9                | 4.28                       | 4.504        | 41.98        |
| Barnesiella_OTU#847                | 2.87                | 0                          | 9.73                | 1.76                       | 2.551        | 45.06        |
| Lactobacillus_OTU#1190             | 1.3                 | 8.16                       | 0.525               | 0.14                       | 2.309        | 47.86        |
| Lactobacillus_OTU#1134             | 1.87                | 0                          | 0.725               | 7.48                       | 2.153        | 50.46        |
| Ureaplasma_OTU#1212                | 0.517               | 7.9                        | 0                   | 0                          | 2.031        | 52.92        |
| Parasutterella_OTU#1231            | 4.23                | 4.26                       | 5.75                | 3.04                       | 1.9          | 55.22        |
| Paludibacter_OTU#1221              | 0.483               | 5.74                       | 2.23                | 0.66                       | 1.768        | 57.36        |
| Paludibacter_OTU#1077              | 1.25                | 1.16                       | 5                   | 5.3                        | 1.715        | 59.43        |
| Tannerella_OTU#1230                | 1.93                | 5.06                       | 0.45                | 0.44                       | 1.441        | 61.17        |
| Barnesiella_OTU#854                | 3.03                | 0                          | 4                   | 0.58                       | 1.332        | 62.78        |
| Anaerophaga_OTU#1159               | 4.67                | 0                          | 0                   | 0                          | 1.315        | 64.38        |
| Lactobacillus_OTU#1161             | 0.0667              | 0                          | 0.175               | 4.7                        | 1.203        | 65.83        |
| Limibacter_OTU#273                 | 4.08                | 0                          | 0                   | 0                          | 1.151        | 67.22        |
| Paludibacter_OTU#1060              | 2.53                | 1.58                       | 2.07                | 3.72                       | 1.085        | 68.53        |
| Paludibacter_OTU#1075              | 0.167               | 0.68                       | 2.52                | 3                          | 1.004        | 69.75        |
| Enterobacter_OTU#1220              | 0.1                 | 3.84                       | 0                   | 0                          | 0.9893       | 70.95        |
| Barnesiella_OTU#1055               | 0.6                 | 0.3                        | 3.5                 | 1.76                       | 0.9379       | 72.08        |
| Rikenella_OTU#1092                 | 1.53                | 0.44                       | 3.43                | 2.68                       | 0.9289       | 73.2         |
| Barnesiella_OTU#1072               | 0.4                 | 1.42                       | 0.425               | 2.28                       | 0.7909       | 74.16        |
| Roseburia_OTU#1225                 | 0.0167              | 3.1                        | 0                   | 0                          | 0.7829       | 75.11        |
| Unclassified_Bacteroidetes_OTU#844 | 0.0333              | 0.02                       | 2.88                | 0.86                       | 0.7604       | 76.03        |
| Allobaculum_OTU#1165               | 1.87                | 0.26                       | 0                   | 0                          | 0.5755       | 76.72        |
| Rikenella_OTU#1105                 | 0.217               | 1.32                       | 0.5                 | 1.12                       | 0.5215       | 77.35        |

|                                    |        |      |       |      |         |       |
|------------------------------------|--------|------|-------|------|---------|-------|
| Rikenella_OTU#1089                 | 1.55   | 0.26 | 0.975 | 0.7  | 0.5168  | 77.98 |
| Paludibacter_OTU#435               | 0.233  | 1.6  | 0     | 0    | 0.4329  | 78.5  |
| Anaerophaga_OTU#1150               | 1.33   | 0    | 0     | 0    | 0.3758  | 78.96 |
| Paludibacter_OTU#1083              | 0.683  | 0.7  | 0.375 | 1.24 | 0.3574  | 79.39 |
| Allobaculum_OTU#853                | 0      | 0    | 1.3   | 0.44 | 0.357   | 79.82 |
| Paludibacter_OTU#1034              | 0.2    | 1.24 | 0.05  | 0.2  | 0.349   | 80.24 |
| Barnesiella_OTU#802                | 0.05   | 0.04 | 1.4   | 0.12 | 0.3148  | 80.62 |
| Barnesiella_OTU#344                | 0      | 1.04 | 0     | 0    | 0.2617  | 80.94 |
| Paludibacter_OTU#1059              | 0      | 0.02 | 0.925 | 0.4  | 0.252   | 81.25 |
| Limibacter_OTU#434                 | 0.5    | 0.6  | 0     | 0    | 0.2517  | 81.55 |
| Rikenella_OTU#886                  | 0      | 0    | 0.6   | 0.68 | 0.2322  | 81.83 |
| Paludibacter_OTU#1088              | 0      | 0.16 | 0.725 | 0.36 | 0.2201  | 82.1  |
| Paludibacter_OTU#1043              | 0      | 0    | 0.375 | 0.68 | 0.2154  | 82.36 |
| Barnesiella_OTU#1226               | 0.667  | 0.26 | 0.3   | 0.22 | 0.2087  | 82.61 |
| Anaerophaga_OTU#939                | 0      | 0.28 | 0.375 | 0.24 | 0.1752  | 82.82 |
| Paludibacter_OTU#402               | 0.0333 | 0.6  | 0     | 0    | 0.1577  | 83.01 |
| Paludibacter_OTU#1070              | 0      | 0.02 | 0.575 | 0.28 | 0.156   | 83.2  |
| Dorea_OTU#417                      | 0      | 0.62 | 0     | 0    | 0.156   | 83.39 |
| Sporacetigenium_OTU#1179           | 0      | 0.62 | 0     | 0    | 0.156   | 83.58 |
| Bacteroides_OTU#1215               | 0.0167 | 0.52 | 0     | 0    | 0.1329  | 83.74 |
| Paludibacter_OTU#418               | 0.0167 | 0.5  | 0     | 0    | 0.1292  | 83.9  |
| Limibacter_OTU#334                 | 0.25   | 0.3  | 0     | 0    | 0.1265  | 84.05 |
| Paludibacter_OTU#734               | 0      | 0.16 | 0.375 | 0.14 | 0.1191  | 84.19 |
| Barnesiella_OTU#1208               | 0.233  | 0.3  | 0     | 0    | 0.1138  | 84.33 |
| Barnesiella_OTU#935                | 0      | 0    | 0.45  | 0.14 | 0.1131  | 84.47 |
| Barnesiella_OTU#841                | 0.183  | 0.2  | 0.125 | 0.04 | 0.1074  | 84.6  |
| Paludibacter_OTU#325               | 0.367  | 0.02 | 0     | 0    | 0.105   | 84.72 |
| Limibacter_OTU#849                 | 0      | 0    | 0.4   | 0.12 | 0.1027  | 84.85 |
| Flexithrix_OTU#405                 | 0.0833 | 0.34 | 0     | 0    | 0.1023  | 84.97 |
| Paludibacter_OTU#815               | 0.2    | 0    | 0.3   | 0.04 | 0.1013  | 85.1  |
| Bacteroides_OTU#1203               | 0      | 0.4  | 0     | 0    | 0.1007  | 85.22 |
| Paludibacter_OTU#1056              | 0      | 0.1  | 0.05  | 0.3  | 0.09664 | 85.33 |
| Unclassified_Bacteroidales_OTU#879 | 0      | 0    | 0.35  | 0.12 | 0.09128 | 85.44 |
| Paludibacter_OTU#1022              | 0.0667 | 0.22 | 0.1   | 0.18 | 0.0906  | 85.55 |
| Paludibacter_OTU#1204              | 0.0167 | 0.02 | 0.325 | 0.12 | 0.09027 | 85.66 |
| Paludibacter_OTU#1066              | 0      | 0    | 0.15  | 0.24 | 0.08054 | 85.76 |
| Anaerostipes_OTU#1211              | 0      | 0.32 | 0     | 0    | 0.08054 | 85.86 |
| Paludibacter_OTU#1213              | 0.0167 | 0.24 | 0.1   | 0.1  | 0.0755  | 85.95 |
| Barnesiella_OTU#1081               | 0.0833 | 0    | 0.275 | 0.1  | 0.07483 | 86.04 |
| Limibacter_OTU#430                 | 0.0333 | 0.26 | 0     | 0    | 0.07215 | 86.13 |
| Paludibacter_OTU#1050              | 0.0167 | 0.08 | 0.025 | 0.24 | 0.07114 | 86.21 |



|                                          |        |      |       |      |         |       |
|------------------------------------------|--------|------|-------|------|---------|-------|
| Rikenella_OTU#917                        | 0      | 0.16 | 0     | 0.14 | 0.07081 | 86.3  |
| Salinibacterium_OTU#708                  | 0      | 0.08 | 0.25  | 0.02 | 0.06946 | 86.38 |
| Akkermansia_OTU#1216                     | 0      | 0.26 | 0     | 0    | 0.06544 | 86.46 |
| Tannerella_OTU#68                        | 0      | 0.24 | 0.025 | 0    | 0.0651  | 86.54 |
| unclassified_Bacteroidales_OTU#1054      | 0.0333 | 0.02 | 0.225 | 0.12 | 0.06208 | 86.62 |
| Rikenella_OTU#658                        | 0      | 0    | 0.225 | 0.08 | 0.06107 | 86.69 |
| unclassified_Bacteroidetes_OTU#1096      | 0      | 0    | 0.15  | 0.14 | 0.05872 | 86.76 |
| Allobaculum_OTU#831                      | 0      | 0    | 0.2   | 0.08 | 0.05772 | 86.83 |
| Paludibacter_OTU#579                     | 0.167  | 0    | 0.1   | 0    | 0.05772 | 86.9  |
| Paludibacter_OTU#910                     | 0      | 0.12 | 0.05  | 0.1  | 0.05738 | 86.97 |
| Anaerophaga_OTU#1140                     | 0.2    | 0    | 0     | 0    | 0.05638 | 87.04 |
| unclassified_Porphyrimonadaceae_OTU#1155 | 0.2    | 0    | 0     | 0    | 0.05638 | 87.11 |
| Paludibacter_OTU#1102                    | 0.0167 | 0.16 | 0.025 | 0.1  | 0.05604 | 87.17 |
| Limibacter_OTU#1038                      | 0.15   | 0.08 | 0     | 0.04 | 0.05503 | 87.24 |
| Paludibacter_OTU#1074                    | 0.0333 | 0.04 | 0.05  | 0.18 | 0.0547  | 87.31 |
| Parasutterella_OTU#1210                  | 0.05   | 0.18 | 0     | 0    | 0.05336 | 87.37 |
| Unclassified_Porphyrimonadaceae_OTU#961  | 0      | 0    | 0.125 | 0.14 | 0.05134 | 87.43 |
| Barnesiella_OTU#689                      | 0      | 0    | 0.225 | 0.02 | 0.05067 | 87.49 |
| Bacteroides_OTU#1207                     | 0      | 0.2  | 0     | 0    | 0.05034 | 87.56 |
| Anaerophaga_OTU#925                      | 0.0333 | 0.12 | 0.075 | 0.02 | 0.04866 | 87.61 |
| Paludibacter_OTU#799                     | 0.117  | 0.02 | 0.05  | 0.06 | 0.04832 | 87.67 |
| Paludibacter_OTU#949                     | 0      | 0.06 | 0.075 | 0.1  | 0.04497 | 87.73 |
| Allobaculum_OTU#753                      | 0      | 0    | 0.175 | 0.04 | 0.0443  | 87.78 |
| Allobaculum_OTU#789                      | 0      | 0    | 0.175 | 0.04 | 0.0443  | 87.83 |
| Paludibacter_OTU#834                     | 0      | 0    | 0.1   | 0.1  | 0.04396 | 87.89 |
| Enterorhabdus_OTU#330                    | 0.0167 | 0.16 | 0     | 0    | 0.04362 | 87.94 |
| Lawsonia_OTU#1227                        | 0.05   | 0.14 | 0     | 0    | 0.04329 | 87.99 |
| Paludibacter_OTU#735                     | 0.0667 | 0    | 0.15  | 0    | 0.04295 | 88.04 |
| Paludibacter_OTU#403                     | 0.0833 | 0.1  | 0     | 0    | 0.04262 | 88.1  |
| Limibacter_OTU#216                       | 0.15   | 0    | 0     | 0    | 0.04228 | 88.15 |
| unclassified_Bacteroidales_OTU#1163      | 0.15   | 0    | 0     | 0    | 0.04228 | 88.2  |
| Paludibacter_OTU#1188                    | 0.0333 | 0.08 | 0     | 0.08 | 0.04161 | 88.25 |
| Barnesiella_OTU#555                      | 0.133  | 0    | 0.025 | 0    | 0.04094 | 88.3  |
| Allobaculum_OTU#758                      | 0      | 0    | 0.125 | 0.06 | 0.03859 | 88.34 |
| Paludibacter_OTU#294                     | 0.133  | 0    | 0     | 0    | 0.03758 | 88.39 |
| Anaerophaga_OTU#1158                     | 0.133  | 0    | 0     | 0    | 0.03758 | 88.44 |
| Limibacter_OTU#1130                      | 0.133  | 0    | 0     | 0    | 0.03758 | 88.48 |
| Unclassified_Bacteroidetes_OTU#922       | 0      | 0    | 0.05  | 0.12 | 0.03691 | 88.53 |
| Paludibacter_OTU#905                     | 0.0167 | 0.02 | 0     | 0.12 | 0.03658 | 88.57 |
| Paludibacter_OTU#707                     | 0.0333 | 0    | 0.15  | 0    | 0.03624 | 88.61 |
| Oscillibacter_OTU#576                    | 0.117  | 0    | 0.025 | 0    | 0.03624 | 88.66 |

|                                          |        |      |       |      |         |       |
|------------------------------------------|--------|------|-------|------|---------|-------|
| Paludibacter_OTU#653                     | 0      | 0    | 0.15  | 0.02 | 0.03591 | 88.7  |
| Tannerella_OTU#1076                      | 0.0333 | 0.1  | 0     | 0.02 | 0.03557 | 88.74 |
| Rikenella_OTU#1044                       | 0      | 0    | 0     | 0.14 | 0.03523 | 88.79 |
| Streptophyta_OTU#340                     | 0      | 0.14 | 0     | 0    | 0.03523 | 88.83 |
| Unclassified_Porphyrromonadaceae_OTU#666 | 0.0833 | 0.04 | 0.025 | 0    | 0.03423 | 88.87 |
| Paludibacter_OTU#976                     | 0.05   | 0.08 | 0.025 | 0.04 | 0.03423 | 88.91 |
| Allobaculum_OTU#766                      | 0      | 0    | 0.125 | 0.04 | 0.03356 | 88.95 |
| Paludibacter_OTU#1003                    | 0.0167 | 0.04 | 0.025 | 0.08 | 0.03356 | 88.99 |
| Paludibacter_OTU#906                     | 0      | 0.1  | 0.025 | 0.02 | 0.03356 | 89.03 |
| Paludibacter_OTU#1036                    | 0      | 0.02 | 0     | 0.12 | 0.03322 | 89.07 |
| Limibacter_OTU#147                       | 0.117  | 0    | 0     | 0    | 0.03289 | 89.11 |
| Paludibacter_OTU#1064                    | 0.0167 | 0    | 0     | 0.12 | 0.03289 | 89.15 |
| Paludibacter_OTU#199                     | 0.117  | 0    | 0     | 0    | 0.03289 | 89.19 |
| Paludibacter_OTU#1047                    | 0      | 0    | 0.1   | 0.06 | 0.03255 | 89.23 |
| Paludibacter_OTU#1073                    | 0      | 0.04 | 0     | 0.1  | 0.03255 | 89.27 |
| Rikenella_OTU#929                        | 0.05   | 0    | 0.075 | 0.04 | 0.03221 | 89.31 |
| unclassified_OTU#1000                    | 0      | 0.02 | 0.125 | 0.02 | 0.03221 | 89.35 |
| Anaerophaga_OTU#404                      | 0.05   | 0.08 | 0     | 0    | 0.03154 | 89.39 |
| Paludibacter_OTU#712                     | 0.0167 | 0    | 0.125 | 0    | 0.0302  | 89.42 |
| Barnesiella_OTU#697                      | 0.0167 | 0    | 0.1   | 0.04 | 0.0302  | 89.46 |
| Atopobacter_OTU#397                      | 0      | 0.12 | 0     | 0    | 0.0302  | 89.5  |
| Allobaculum_OTU#601                      | 0      | 0    | 0.125 | 0.02 | 0.02987 | 89.53 |
| Clostridium_OTU#701                      | 0      | 0    | 0.125 | 0.02 | 0.02987 | 89.57 |
| Limibacter_OTU#121                       | 0.0833 | 0.04 | 0     | 0    | 0.02953 | 89.61 |
| Paludibacter_OTU#596                     | 0.0333 | 0    | 0.05  | 0.06 | 0.02919 | 89.64 |
| Paludibacter_OTU#960                     | 0      | 0    | 0.025 | 0.1  | 0.02919 | 89.68 |
| Allobaculum_OTU#571                      | 0      | 0    | 0.1   | 0.04 | 0.02886 | 89.71 |
| Paludibacter_OTU#932                     | 0.0167 | 0    | 0     | 0.1  | 0.02852 | 89.75 |
| Limibacter_OTU#246                       | 0.1    | 0    | 0     | 0    | 0.02819 | 89.78 |
| Paludibacter_OTU#290                     | 0.1    | 0    | 0     | 0    | 0.02819 | 89.81 |
| Allobaculum_OTU#1142                     | 0.1    | 0    | 0     | 0    | 0.02819 | 89.85 |
| Parasutterella_OTU#1177                  | 0.0333 | 0.08 | 0     | 0    | 0.02752 | 89.88 |
| Paludibacter_OTU#767                     | 0.0333 | 0    | 0.075 | 0.02 | 0.02718 | 89.91 |
| Paludibacter_OTU#995                     | 0      | 0.02 | 0.025 | 0.08 | 0.02718 | 89.95 |
| Limibacter_OTU#328                       | 0.0833 | 0.02 | 0     | 0    | 0.02718 | 89.98 |
| Paludibacter_OTU#994                     | 0      | 0    | 0.05  | 0.08 | 0.02685 | 90.01 |
| Paludibacter_OTU#725                     | 0      | 0    | 0.125 | 0    | 0.02685 | 90.04 |
| Paludibacter_OTU#694                     | 0      | 0    | 0.125 | 0    | 0.02685 | 90.08 |
| Anaerophaga_OTU#732                      | 0      | 0    | 0.125 | 0    | 0.02685 | 90.11 |
| unclassified_Bacteroidales_OTU#326       | 0.0833 | 0.02 | 0     | 0    | 0.02651 | 90.14 |
| Tannerella_OTU#36                        | 0.0167 | 0.06 | 0.025 | 0.02 | 0.02617 | 90.17 |

|                                           |        |      |       |      |         |       |
|-------------------------------------------|--------|------|-------|------|---------|-------|
| Paludibacter_OTU#876                      | 0      | 0.02 | 0.075 | 0.04 | 0.02584 | 90.2  |
| Helicobacter_OTU#1214                     | 0.05   | 0.06 | 0     | 0    | 0.02584 | 90.24 |
| Paludibacter_OTU#773                      | 0.0167 | 0    | 0.1   | 0.02 | 0.02517 | 90.27 |
| Paludibacter_OTU#64                       | 0      | 0.1  | 0     | 0    | 0.02517 | 90.3  |
| Paludibacter_OTU#356                      | 0      | 0.1  | 0     | 0    | 0.02517 | 90.33 |
| Asaccharobacter_OTU#1063                  | 0      | 0    | 0     | 0.1  | 0.02517 | 90.36 |
| Barnesiella_OTU#1189                      | 0      | 0.1  | 0     | 0    | 0.02517 | 90.39 |
| Paludibacter_OTU#558                      | 0      | 0    | 0.075 | 0.04 | 0.02483 | 90.42 |
| Barnesiella_OTU#850                       | 0      | 0    | 0.1   | 0.02 | 0.0245  | 90.45 |
| Rikenella_OTU#687                         | 0.0167 | 0    | 0.1   | 0    | 0.02416 | 90.48 |
| Limibacter_OTU#709                        | 0.0167 | 0    | 0.1   | 0    | 0.02416 | 90.51 |
| Paludibacter_OTU#1042                     | 0      | 0.02 | 0     | 0.08 | 0.02383 | 90.54 |
| Dorea_OTU#983                             | 0      | 0.06 | 0     | 0.04 | 0.02383 | 90.56 |
| Paludibacter_OTU#1095                     | 0.0167 | 0    | 0.075 | 0.04 | 0.02349 | 90.59 |
| unclassified_Porphyrromonadaceae_OTU#1071 | 0      | 0.02 | 0.05  | 0.06 | 0.02349 | 90.62 |
| Paludibacter_OTU#191                      | 0.0833 | 0    | 0     | 0    | 0.02349 | 90.65 |
| Barnesiella_OTU#208                       | 0.0833 | 0    | 0     | 0    | 0.02349 | 90.68 |
| Allobaculum_OTU#194                       | 0.0833 | 0    | 0     | 0    | 0.02349 | 90.71 |
| Limibacter_OTU#94                         | 0.0833 | 0    | 0     | 0    | 0.02349 | 90.73 |
| Limibacter_OTU#433                        | 0.0167 | 0.08 | 0     | 0    | 0.02349 | 90.76 |
| Limibacter_OTU#1146                       | 0.0833 | 0    | 0     | 0    | 0.02349 | 90.79 |
| Rikenella_OTU#1154                        | 0.0833 | 0    | 0     | 0    | 0.02349 | 90.82 |
| Anaerophaga_OTU#1132                      | 0.0833 | 0    | 0     | 0    | 0.02349 | 90.85 |
| Paludibacter_OTU#920                      | 0      | 0    | 0.05  | 0.06 | 0.02315 | 90.88 |
| Paludibacter_OTU#1196                     | 0.0333 | 0.06 | 0     | 0    | 0.02315 | 90.9  |
| Paludibacter_OTU#540                      | 0.0667 | 0    | 0.025 | 0    | 0.02282 | 90.93 |
| Barnesiella_OTU#95                        | 0.0167 | 0.08 | 0     | 0    | 0.02282 | 90.96 |
| Barnesiella_OTU#894                       | 0.0167 | 0    | 0.075 | 0.02 | 0.02248 | 90.99 |
| Limibacter_OTU#318                        | 0.0667 | 0.02 | 0     | 0    | 0.02248 | 91.01 |
| Barnesiella_OTU#806                       | 0.0167 | 0    | 0.05  | 0.04 | 0.02215 | 91.04 |
| Paludibacter_OTU#808                      | 0.0167 | 0    | 0.05  | 0.04 | 0.02215 | 91.07 |
| Paludibacter_OTU#592                      | 0.0667 | 0    | 0.025 | 0    | 0.02215 | 91.09 |
| Rikenella_OTU#1002                        | 0      | 0.02 | 0.025 | 0.06 | 0.02215 | 91.12 |
| Anaerophaga_OTU#1062                      | 0.0167 | 0    | 0.05  | 0.04 | 0.02215 | 91.15 |
| Limibacter_OTU#407                        | 0.0667 | 0.02 | 0     | 0    | 0.02181 | 91.17 |
| Paludibacter_OTU#921                      | 0.0167 | 0    | 0.025 | 0.06 | 0.02181 | 91.2  |
| Limibacter_OTU#1166                       | 0.0667 | 0    | 0.025 | 0    | 0.02148 | 91.23 |
| Barnesiella_OTU#556                       | 0.0167 | 0    | 0.075 | 0    | 0.02013 | 91.25 |
| Barnesiella_OTU#748                       | 0.0167 | 0    | 0.075 | 0    | 0.02013 | 91.28 |
| Parasutterella_OTU#1217                   | 0      | 0.08 | 0     | 0    | 0.02013 | 91.3  |
| Paludibacter_OTU#54                       | 0      | 0.08 | 0     | 0    | 0.02013 | 91.32 |

|                                         |        |      |       |      |         |       |
|-----------------------------------------|--------|------|-------|------|---------|-------|
| Paludibacter_OTU#61                     | 0      | 0.08 | 0     | 0    | 0.02013 | 91.35 |
| Blautia_OTU#53                          | 0      | 0.08 | 0     | 0    | 0.02013 | 91.37 |
| Parabacteroides_OTU#1182                | 0      | 0.08 | 0     | 0    | 0.02013 | 91.4  |
| Thermonema_OTU#866                      | 0      | 0    | 0     | 0.08 | 0.02013 | 91.42 |
| Parasutterella_OTU#1232                 | 0      | 0.08 | 0     | 0    | 0.02013 | 91.45 |
| Paludibacter_OTU#1206                   | 0      | 0.02 | 0.075 | 0    | 0.0198  | 91.47 |
| Unclassified_Bacteroidales_OTU#738      | 0      | 0    | 0.075 | 0.02 | 0.0198  | 91.49 |
| Sporacetigenium_OTU#669                 | 0      | 0    | 0.075 | 0.02 | 0.0198  | 91.52 |
| Prevotella_OTU#441                      | 0      | 0    | 0.025 | 0.06 | 0.0198  | 91.54 |
| Paludibacter_OTU#721                    | 0      | 0    | 0.075 | 0.02 | 0.0198  | 91.57 |
| Rikenella_OTU#1006                      | 0.0333 | 0    | 0.025 | 0.04 | 0.01946 | 91.59 |
| Parasutterella_OTU#456                  | 0      | 0    | 0.075 | 0.02 | 0.01913 | 91.61 |
| Unclassified_Bacteroidetes_OTU#776      | 0      | 0    | 0.075 | 0.02 | 0.01913 | 91.64 |
| Barnesiella_OTU#690                     | 0      | 0    | 0.075 | 0.02 | 0.01913 | 91.66 |
| Paludibacter_OTU#772                    | 0      | 0    | 0.075 | 0.02 | 0.01913 | 91.68 |
| Robinsoniella_OTU#1098                  | 0.0167 | 0.06 | 0     | 0    | 0.01913 | 91.7  |
| Parasutterella_OTU#275                  | 0.0667 | 0    | 0     | 0    | 0.01879 | 91.73 |
| Limibacter_OTU#213                      | 0.0667 | 0    | 0     | 0    | 0.01879 | 91.75 |
| Unclassified_Bacteroidetes_OTU#276      | 0.0667 | 0    | 0     | 0    | 0.01879 | 91.77 |
| Limibacter_OTU#281                      | 0.0667 | 0    | 0     | 0    | 0.01879 | 91.8  |
| Limibacter_OTU#264                      | 0.0667 | 0    | 0     | 0    | 0.01879 | 91.82 |
| Rikenella_OTU#1136                      | 0.0667 | 0    | 0     | 0    | 0.01879 | 91.84 |
| Paludibacter_OTU#1078                   | 0      | 0.02 | 0     | 0.06 | 0.01879 | 91.86 |
| Allobaculum_OTU#1156                    | 0.0667 | 0    | 0     | 0    | 0.01879 | 91.89 |
| Paludibacter_OTU#1147                   | 0.0667 | 0    | 0     | 0    | 0.01879 | 91.91 |
| Barnesiella_OTU#804                     | 0.0167 | 0    | 0.05  | 0.02 | 0.01846 | 91.93 |
| Paludibacter_OTU#971                    | 0      | 0.04 | 0.025 | 0.02 | 0.01846 | 91.95 |
| Unclassified_Porphryomonadaceae_OTU#830 | 0      | 0.02 | 0.025 | 0.04 | 0.01846 | 91.98 |
| Tannerella_OTU#414                      | 0.0167 | 0.06 | 0     | 0    | 0.01846 | 92    |
| unclassified_Bacteroidales_OTU#1041     | 0      | 0    | 0.025 | 0.06 | 0.01846 | 92.02 |
| Paludibacter_OTU#364                    | 0.0333 | 0.04 | 0     | 0    | 0.01812 | 92.04 |
| Paludibacter_OTU#496                    | 0.05   | 0    | 0.025 | 0    | 0.01812 | 92.06 |
| Unclassified_Bacteroidales_OTU#923      | 0      | 0    | 0.05  | 0.04 | 0.01812 | 92.09 |
| Paludibacter_OTU#671                    | 0      | 0    | 0.05  | 0.04 | 0.01812 | 92.11 |
| Barnesiella_OTU#848                     | 0.05   | 0    | 0     | 0.02 | 0.01779 | 92.13 |
| Tannerella_OTU#343                      | 0.0167 | 0.06 | 0     | 0    | 0.01779 | 92.15 |
| Barnesiella_OTU#664                     | 0.0333 | 0    | 0.05  | 0    | 0.01745 | 92.17 |
| Unclassified_Bacteroidales_OTU#978      | 0.0167 | 0    | 0.025 | 0.04 | 0.01678 | 92.19 |
| Barnesiella_OTU#816                     | 0.0167 | 0    | 0.025 | 0.04 | 0.01678 | 92.21 |
| Unclassified_Bacteroidales_OTU#774      | 0.0333 | 0    | 0.025 | 0.02 | 0.01644 | 92.23 |
| Anaerophaga_OTU#637                     | 0      | 0    | 0.075 | 0    | 0.01611 | 92.25 |

|                                    |   |      |       |      |         |       |
|------------------------------------|---|------|-------|------|---------|-------|
| Barnesiella_OTU#606                | 0 | 0    | 0.075 | 0    | 0.01611 | 92.27 |
| Barnesiella_OTU#583                | 0 | 0    | 0.075 | 0    | 0.01611 | 92.29 |
| Paludibacter_OTU#649               | 0 | 0    | 0.075 | 0    | 0.01611 | 92.31 |
| Paludibacter_OTU#642               | 0 | 0    | 0.075 | 0    | 0.01611 | 92.33 |
| Anaerophaga_OTU#722                | 0 | 0    | 0.075 | 0    | 0.01611 | 92.35 |
| Paludibacter_OTU#740               | 0 | 0    | 0.075 | 0    | 0.01611 | 92.37 |
| Paludibacter_OTU#736               | 0 | 0    | 0.075 | 0    | 0.01611 | 92.39 |
| Barnesiella_OTU#475                | 0 | 0    | 0.05  | 0.02 | 0.0151  | 92.41 |
| Barnesiella_OTU#751                | 0 | 0    | 0.05  | 0.02 | 0.0151  | 92.43 |
| Allobaculum_OTU#500                | 0 | 0    | 0.05  | 0.02 | 0.0151  | 92.44 |
| Smithella_OTU#557                  | 0 | 0.02 | 0.05  | 0    | 0.0151  | 92.46 |
| Rikenella_OTU#1018                 | 0 | 0    | 0     | 0.06 | 0.0151  | 92.48 |
| Paludibacter_OTU#979               | 0 | 0    | 0     | 0.06 | 0.0151  | 92.5  |
| Paludibacter_OTU#1019              | 0 | 0    | 0.05  | 0.02 | 0.0151  | 92.52 |
| Paludibacter_OTU#963               | 0 | 0    | 0.05  | 0.02 | 0.0151  | 92.53 |
| Rikenella_OTU#1051                 | 0 | 0    | 0     | 0.06 | 0.0151  | 92.55 |
| Paludibacter_OTU#1025              | 0 | 0    | 0.05  | 0.02 | 0.0151  | 92.57 |
| Anaerophaga_OTU#1082               | 0 | 0    | 0     | 0.06 | 0.0151  | 92.59 |
| Paludibacter_OTU#1029              | 0 | 0    | 0     | 0.06 | 0.0151  | 92.61 |
| Paludibacter_OTU#1080              | 0 | 0    | 0     | 0.06 | 0.0151  | 92.63 |
| Anaerovorax_OTU#381                | 0 | 0.06 | 0     | 0    | 0.0151  | 92.64 |
| Robinsoniella_OTU#400              | 0 | 0.06 | 0     | 0    | 0.0151  | 92.66 |
| Dorea_OTU#1032                     | 0 | 0    | 0     | 0.06 | 0.0151  | 92.68 |
| Paludibacter_OTU#867               | 0 | 0    | 0     | 0.06 | 0.0151  | 92.7  |
| Blautia_OTU#47                     | 0 | 0.06 | 0     | 0    | 0.0151  | 92.72 |
| Paludibacter_OTU#69                | 0 | 0.06 | 0     | 0    | 0.0151  | 92.74 |
| Paludibacter_OTU#65                | 0 | 0.06 | 0     | 0    | 0.0151  | 92.75 |
| Paludibacter_OTU#40                | 0 | 0.06 | 0     | 0    | 0.0151  | 92.77 |
| Paraprevotella_OTU#1219            | 0 | 0.06 | 0     | 0    | 0.0151  | 92.79 |
| Anaerostipes_OTU#1198              | 0 | 0.06 | 0     | 0    | 0.0151  | 92.81 |
| Barnesiella_OTU#839                | 0 | 0    | 0.025 | 0.04 | 0.01477 | 92.83 |
| Barnesiella_OTU#842                | 0 | 0    | 0.025 | 0.04 | 0.01477 | 92.84 |
| Anaerophaga_OTU#991                | 0 | 0    | 0.025 | 0.04 | 0.01477 | 92.86 |
| Paludibacter_OTU#636               | 0 | 0.04 | 0.025 | 0    | 0.01477 | 92.88 |
| Pseudozobellia_OTU#504             | 0 | 0    | 0.05  | 0.02 | 0.01443 | 92.9  |
| Unclassified_Bacteroidales_OTU#819 | 0 | 0    | 0.05  | 0.02 | 0.01443 | 92.92 |
| Paludibacter_OTU#604               | 0 | 0    | 0.05  | 0.02 | 0.01443 | 92.93 |
| Paludibacter_OTU#975               | 0 | 0    | 0.05  | 0.02 | 0.01443 | 92.95 |
| Unclassified_Bacteroidales_OTU#981 | 0 | 0.04 | 0     | 0.02 | 0.01443 | 92.97 |
| Pseudozobellia_OTU#370             | 0 | 0.04 | 0     | 0.02 | 0.01443 | 92.99 |
| Paludibacter_OTU#1012              | 0 | 0.04 | 0     | 0.02 | 0.01443 | 93    |

|                                         |        |      |       |      |         |       |
|-----------------------------------------|--------|------|-------|------|---------|-------|
| Paludibacter_OTU#230                    | 0.05   | 0    | 0     | 0    | 0.01409 | 93.02 |
| Anaerophaga_OTU#992                     | 0      | 0    | 0.025 | 0.04 | 0.01409 | 93.04 |
| Paludibacter_OTU#880                    | 0      | 0    | 0.025 | 0.04 | 0.01409 | 93.05 |
| Allobaculum_OTU#284                     | 0.05   | 0    | 0     | 0    | 0.01409 | 93.07 |
| Barnesiella_OTU#219                     | 0.05   | 0    | 0     | 0    | 0.01409 | 93.09 |
| Tannerella_OTU#1026                     | 0      | 0    | 0.025 | 0.04 | 0.01409 | 93.1  |
| Paludibacter_OTU#999                    | 0      | 0    | 0.025 | 0.04 | 0.01409 | 93.12 |
| Limibacter_OTU#291                      | 0.05   | 0    | 0     | 0    | 0.01409 | 93.14 |
| Anaerophaga_OTU#813                     | 0      | 0    | 0.025 | 0.04 | 0.01409 | 93.16 |
| Paludibacter_OTU#185                    | 0.05   | 0    | 0     | 0    | 0.01409 | 93.17 |
| Limibacter_OTU#279                      | 0.05   | 0    | 0     | 0    | 0.01409 | 93.19 |
| Rikenella_OTU#1119                      | 0.05   | 0    | 0     | 0    | 0.01409 | 93.21 |
| Eggerthella_OTU#970                     | 0      | 0    | 0.025 | 0.04 | 0.01409 | 93.22 |
| Aquiflexum_OTU#158                      | 0.05   | 0    | 0     | 0    | 0.01409 | 93.24 |
| Tannerella_OTU#243                      | 0.0167 | 0.04 | 0     | 0    | 0.01409 | 93.26 |
| Lactovum_OTU#154                        | 0.05   | 0    | 0     | 0    | 0.01409 | 93.28 |
| Paludibacter_OTU#1186                   | 0.0167 | 0.04 | 0     | 0    | 0.01409 | 93.29 |
| Limibacter_OTU#1107                     | 0.05   | 0    | 0     | 0    | 0.01409 | 93.31 |
| Allobaculum_OTU#1144                    | 0.05   | 0    | 0     | 0    | 0.01409 | 93.33 |
| Paludibacter_OTU#136                    | 0.0333 | 0    | 0     | 0.02 | 0.01376 | 93.34 |
| Paludibacter_OTU#997                    | 0      | 0.02 | 0.025 | 0.02 | 0.01342 | 93.36 |
| Rikenella_OTU#742                       | 0.0333 | 0    | 0.025 | 0    | 0.01342 | 93.38 |
| Paludibacter_OTU#317                    | 0.0167 | 0.04 | 0     | 0    | 0.01342 | 93.39 |
| Paludibacter_OTU#1053                   | 0      | 0.02 | 0.025 | 0.02 | 0.01342 | 93.41 |
| Anaerophaga_OTU#580                     | 0.0167 | 0.02 | 0.025 | 0    | 0.01309 | 93.42 |
| Paludibacter_OTU#837                    | 0.0167 | 0    | 0.025 | 0.02 | 0.01309 | 93.44 |
| Paludibacter_OTU#829                    | 0.0167 | 0    | 0.025 | 0.02 | 0.01309 | 93.46 |
| Paludibacter_OTU#989                    | 0.0167 | 0    | 0.025 | 0.02 | 0.01309 | 93.47 |
| Rikenella_OTU#1020                      | 0.0167 | 0    | 0.025 | 0.02 | 0.01309 | 93.49 |
| Barnesiella_OTU#528                     | 0      | 0    | 0.05  | 0    | 0.01074 | 93.5  |
| Barnesiella_OTU#525                     | 0      | 0    | 0.05  | 0    | 0.01074 | 93.51 |
| Paludibacter_OTU#624                    | 0      | 0    | 0.05  | 0    | 0.01074 | 93.53 |
| Unclassified_Porphyrimonadaceae_OTU#587 | 0      | 0    | 0.05  | 0    | 0.01074 | 93.54 |
| Barnesiella_OTU#593                     | 0      | 0    | 0.05  | 0    | 0.01074 | 93.55 |
| Unclassified_Bacteroidetes_OTU#597      | 0      | 0    | 0.05  | 0    | 0.01074 | 93.57 |
| Barnesiella_OTU#582                     | 0      | 0    | 0.05  | 0    | 0.01074 | 93.58 |
| Unclassified_TM7_OTU#503                | 0      | 0    | 0.05  | 0    | 0.01074 | 93.59 |
| Bulleidia_OTU#610                       | 0      | 0    | 0.05  | 0    | 0.01074 | 93.6  |
| Barnesiella_OTU#608                     | 0      | 0    | 0.05  | 0    | 0.01074 | 93.62 |
| Oscillibacter_OTU#534                   | 0      | 0    | 0.05  | 0    | 0.01074 | 93.63 |
| Solobacterium_OTU#598                   | 0      | 0    | 0.05  | 0    | 0.01074 | 93.64 |

|                                     |   |      |      |      |         |       |
|-------------------------------------|---|------|------|------|---------|-------|
| Unclassified_Bacteroidetes_OTU#635  | 0 | 0    | 0.05 | 0    | 0.01074 | 93.66 |
| Barnesiella_OTU#628                 | 0 | 0    | 0.05 | 0    | 0.01074 | 93.67 |
| Paludibacter_OTU#511                | 0 | 0    | 0.05 | 0    | 0.01074 | 93.68 |
| Tuberibacillus_OTU#584              | 0 | 0    | 0.05 | 0    | 0.01074 | 93.69 |
| Paludibacter_OTU#458                | 0 | 0    | 0.05 | 0    | 0.01074 | 93.71 |
| Paludibacter_OTU#465                | 0 | 0    | 0.05 | 0    | 0.01074 | 93.72 |
| Paludibacter_OTU#657                | 0 | 0    | 0.05 | 0    | 0.01074 | 93.73 |
| Barnesiella_OTU#623                 | 0 | 0    | 0.05 | 0    | 0.01074 | 93.75 |
| Solobacterium_OTU#650               | 0 | 0    | 0.05 | 0    | 0.01074 | 93.76 |
| Paludibacter_OTU#619                | 0 | 0    | 0.05 | 0    | 0.01074 | 93.77 |
| Paludibacter_OTU#746                | 0 | 0    | 0.05 | 0    | 0.01074 | 93.79 |
| Barnesiella_OTU#493                 | 0 | 0    | 0.05 | 0    | 0.01074 | 93.8  |
| Paludibacter_OTU#685                | 0 | 0    | 0.05 | 0    | 0.01074 | 93.81 |
| Paludibacter_OTU#723                | 0 | 0    | 0.05 | 0    | 0.01074 | 93.82 |
| unclassified_OTU#696                | 0 | 0    | 0.05 | 0    | 0.01074 | 93.84 |
| Allobaculum_OTU#688                 | 0 | 0    | 0.05 | 0    | 0.01074 | 93.85 |
| Unclassified_Bacteria_OTU#711       | 0 | 0    | 0.05 | 0    | 0.01074 | 93.86 |
| Unclassified_Bacteroidales_OTU#730  | 0 | 0    | 0.05 | 0    | 0.01074 | 93.88 |
| Barnesiella_OTU#741                 | 0 | 0    | 0.05 | 0    | 0.01074 | 93.89 |
| Unclassified_Bacteroidetes_OTU#838  | 0 | 0    | 0    | 0.04 | 0.01007 | 93.9  |
| Paludibacter_OTU#420                | 0 | 0.04 | 0    | 0    | 0.01007 | 93.91 |
| Anaerostipes_OTU#384                | 0 | 0.04 | 0    | 0    | 0.01007 | 93.93 |
| Limibacter_OTU#347                  | 0 | 0.04 | 0    | 0    | 0.01007 | 93.94 |
| Barnesiella_OTU#329                 | 0 | 0.04 | 0    | 0    | 0.01007 | 93.95 |
| Eggerthella_OTU#314                 | 0 | 0.04 | 0    | 0    | 0.01007 | 93.96 |
| Anaerophaga_OTU#1033                | 0 | 0    | 0    | 0.04 | 0.01007 | 93.98 |
| Anaerophaga_OTU#996                 | 0 | 0    | 0    | 0.04 | 0.01007 | 93.99 |
| Barnesiella_OTU#310                 | 0 | 0.04 | 0    | 0    | 0.01007 | 94    |
| Parasporobacterium_OTU#426          | 0 | 0.04 | 0    | 0    | 0.01007 | 94.01 |
| Coprococcus_OTU#375                 | 0 | 0.04 | 0    | 0    | 0.01007 | 94.02 |
| Anaerovorax_OTU#377                 | 0 | 0.04 | 0    | 0    | 0.01007 | 94.04 |
| Marvinbryantia_OTU#421              | 0 | 0.04 | 0    | 0    | 0.01007 | 94.05 |
| Mucispirillum_OTU#395               | 0 | 0.04 | 0    | 0    | 0.01007 | 94.06 |
| Unclassified_Clostridia_OTU#392     | 0 | 0.04 | 0    | 0    | 0.01007 | 94.07 |
| Parasutterella_OTU#966              | 0 | 0    | 0    | 0.04 | 0.01007 | 94.08 |
| Unclassified_Bacteroidales_OTU#1004 | 0 | 0    | 0    | 0.04 | 0.01007 | 94.1  |
| Paludibacter_OTU#376                | 0 | 0.04 | 0    | 0    | 0.01007 | 94.11 |
| unclassified_Bacteroidales_OTU#1093 | 0 | 0    | 0    | 0.04 | 0.01007 | 94.12 |
| Dorea_OTU#1086                      | 0 | 0    | 0    | 0.04 | 0.01007 | 94.13 |
| Marvinbryantia_OTU#1007             | 0 | 0    | 0    | 0.04 | 0.01007 | 94.15 |
| Paludibacter_OTU#1040               | 0 | 0    | 0    | 0.04 | 0.01007 | 94.16 |

|                                         |        |      |       |      |          |       |
|-----------------------------------------|--------|------|-------|------|----------|-------|
| Barnesiella_OTU#936                     | 0      | 0    | 0     | 0.04 | 0.01007  | 94.17 |
| Paludibacter_OTU#52                     | 0      | 0.04 | 0     | 0    | 0.01007  | 94.18 |
| Barnesiella_OTU#30                      | 0      | 0.04 | 0     | 0    | 0.01007  | 94.19 |
| Paludibacter_OTU#70                     | 0      | 0.04 | 0     | 0    | 0.01007  | 94.21 |
| Paludibacter_OTU#67                     | 0      | 0.04 | 0     | 0    | 0.01007  | 94.22 |
| Unclassified_Porphyrimonadaceae_OTU#62  | 0      | 0.04 | 0     | 0    | 0.01007  | 94.23 |
| Bacteroides_OTU#1181                    | 0      | 0.04 | 0     | 0    | 0.01007  | 94.24 |
| Paludibacter_OTU#63                     | 0      | 0.04 | 0     | 0    | 0.01007  | 94.26 |
| Parasutterella_OTU#1222                 | 0      | 0.04 | 0     | 0    | 0.01007  | 94.27 |
| Paludibacter_OTU#1193                   | 0      | 0.04 | 0     | 0    | 0.01007  | 94.28 |
| Parabacteroides_OTU#1180                | 0      | 0.04 | 0     | 0    | 0.01007  | 94.29 |
| Prevotella_OTU#797                      | 0      | 0    | 0.025 | 0.02 | 0.009732 | 94.3  |
| Denitrobacterium_OTU#765                | 0      | 0    | 0.025 | 0.02 | 0.009732 | 94.32 |
| Unclassified_Bacteroidetes_OTU#846      | 0      | 0    | 0.025 | 0.02 | 0.009732 | 94.33 |
| Unclassified_Bacteria_OTU#803           | 0      | 0    | 0.025 | 0.02 | 0.009732 | 94.34 |
| Paludibacter_OTU#790                    | 0      | 0    | 0.025 | 0.02 | 0.009732 | 94.35 |
| Butyricimonas_OTU#786                   | 0      | 0    | 0.025 | 0.02 | 0.009732 | 94.36 |
| Barnesiella_OTU#833                     | 0      | 0    | 0.025 | 0.02 | 0.009732 | 94.37 |
| Paludibacter_OTU#549                    | 0      | 0.02 | 0.025 | 0    | 0.009732 | 94.39 |
| Paludibacter_OTU#798                    | 0      | 0    | 0.025 | 0.02 | 0.009732 | 94.4  |
| Paludibacter_OTU#783                    | 0      | 0    | 0.025 | 0.02 | 0.009732 | 94.41 |
| Unclassified_Bacteroidales_OTU#913      | 0      | 0    | 0.025 | 0.02 | 0.009732 | 94.42 |
| Tannerella_OTU#541                      | 0      | 0    | 0.025 | 0.02 | 0.009732 | 94.43 |
| Unclassified_Bacteroidales_OTU#875      | 0      | 0    | 0.025 | 0.02 | 0.009732 | 94.44 |
| unclassified_OTU#1058                   | 0      | 0    | 0.025 | 0.02 | 0.009732 | 94.46 |
| Paludibacter_OTU#1085                   | 0      | 0    | 0.025 | 0.02 | 0.009732 | 94.47 |
| Paludibacter_OTU#1094                   | 0      | 0    | 0.025 | 0.02 | 0.009732 | 94.48 |
| Paludibacter_OTU#1052                   | 0      | 0    | 0.025 | 0.02 | 0.009732 | 94.49 |
| Paludibacter_OTU#1048                   | 0      | 0    | 0.025 | 0.02 | 0.009732 | 94.5  |
| Paludibacter_OTU#615                    | 0      | 0    | 0.025 | 0.02 | 0.009732 | 94.52 |
| Rikenella_OTU#874                       | 0      | 0    | 0.025 | 0.02 | 0.009732 | 94.53 |
| Unclassified_Bacteroidales_OTU#902      | 0      | 0    | 0.025 | 0.02 | 0.009732 | 94.54 |
| Paludibacter_OTU#959                    | 0      | 0    | 0.025 | 0.02 | 0.009732 | 94.55 |
| Paludibacter_OTU#1087                   | 0      | 0    | 0.025 | 0.02 | 0.009732 | 94.56 |
| Anaerophaga_OTU#146                     | 0.0333 | 0    | 0     | 0    | 0.009396 | 94.57 |
| Parasutterella_OTU#112                  | 0.0333 | 0    | 0     | 0    | 0.009396 | 94.59 |
| Aquiflexum_OTU#135                      | 0.0333 | 0    | 0     | 0    | 0.009396 | 94.6  |
| Barnesiella_OTU#480                     | 0.0167 | 0    | 0.025 | 0    | 0.009396 | 94.61 |
| Unclassified_Porphyrimonadaceae_OTU#466 | 0.0167 | 0    | 0.025 | 0    | 0.009396 | 94.62 |
| Unclassified_Bacteroidales_OTU#594      | 0.0167 | 0    | 0.025 | 0    | 0.009396 | 94.63 |
| unclassified_OTU#633                    | 0.0167 | 0    | 0.025 | 0    | 0.009396 | 94.64 |



|                                          |        |      |       |      |          |       |
|------------------------------------------|--------|------|-------|------|----------|-------|
| Limibacter_OTU#280                       | 0.0333 | 0    | 0     | 0    | 0.009396 | 94.65 |
| Limibacter_OTU#240                       | 0.0333 | 0    | 0     | 0    | 0.009396 | 94.66 |
| Barnesiella_OTU#283                      | 0.0333 | 0    | 0     | 0    | 0.009396 | 94.68 |
| Unclassified_Bacteroidetes_OTU#187       | 0.0333 | 0    | 0     | 0    | 0.009396 | 94.69 |
| Limibacter_OTU#211                       | 0.0333 | 0    | 0     | 0    | 0.009396 | 94.7  |
| Paludibacter_OTU#215                     | 0.0333 | 0    | 0     | 0    | 0.009396 | 94.71 |
| Parasutterella_OTU#126                   | 0.0333 | 0    | 0     | 0    | 0.009396 | 94.72 |
| Paludibacter_OTU#305                     | 0      | 0.02 | 0     | 0.02 | 0.009396 | 94.73 |
| Barnesiella_OTU#713                      | 0.0167 | 0    | 0.025 | 0    | 0.009396 | 94.74 |
| Unclassified_Porphyrromonadaceae_OTU#171 | 0.0333 | 0    | 0     | 0    | 0.009396 | 94.76 |
| Paludibacter_OTU#105                     | 0.0333 | 0    | 0     | 0    | 0.009396 | 94.77 |
| Barnesiella_OTU#293                      | 0.0333 | 0    | 0     | 0    | 0.009396 | 94.78 |
| Paludibacter_OTU#289                     | 0.0333 | 0    | 0     | 0    | 0.009396 | 94.79 |
| Unclassified_Bacteroidetes_OTU#134       | 0.0333 | 0    | 0     | 0    | 0.009396 | 94.8  |
| Barnesiella_OTU#236                      | 0.0333 | 0    | 0     | 0    | 0.009396 | 94.81 |
| Limibacter_OTU#1151                      | 0.0333 | 0    | 0     | 0    | 0.009396 | 94.82 |
| Barnesiella_OTU#257                      | 0.0333 | 0    | 0     | 0    | 0.009396 | 94.84 |
| Unclassified_Bacteroidetes_OTU#221       | 0.0333 | 0    | 0     | 0    | 0.009396 | 94.85 |
| Unclassified_Bacteroidales_OTU#228       | 0.0333 | 0    | 0     | 0    | 0.009396 | 94.86 |
| Unclassified_Bacteroidales_OTU#244       | 0.0333 | 0    | 0     | 0    | 0.009396 | 94.87 |
| Paludibacter_OTU#252                     | 0.0333 | 0    | 0     | 0    | 0.009396 | 94.88 |
| Unclassified_Porphyrromonadaceae_OTU#268 | 0.0333 | 0    | 0     | 0    | 0.009396 | 94.89 |
| Unclassified_Bacteroidetes_OTU#152       | 0.0333 | 0    | 0     | 0    | 0.009396 | 94.9  |
| Rikenella_OTU#162                        | 0.0333 | 0    | 0     | 0    | 0.009396 | 94.91 |
| Diaphorobacter_OTU#172                   | 0.0333 | 0    | 0     | 0    | 0.009396 | 94.93 |
| Limibacter_OTU#168                       | 0.0333 | 0    | 0     | 0    | 0.009396 | 94.94 |
| Paludibacter_OTU#1113                    | 0.0333 | 0    | 0     | 0    | 0.009396 | 94.95 |
| Limibacter_OTU#1141                      | 0.0333 | 0    | 0     | 0    | 0.009396 | 94.96 |
| Limibacter_OTU#1103                      | 0.0333 | 0    | 0     | 0    | 0.009396 | 94.97 |
| Limibacter_OTU#1148                      | 0.0333 | 0    | 0     | 0    | 0.009396 | 94.98 |
| Anaerophaga_OTU#1152                     | 0.0333 | 0    | 0     | 0    | 0.009396 | 94.99 |
| Limibacter_OTU#1139                      | 0.0333 | 0    | 0     | 0    | 0.009396 | 95.01 |
| Limibacter_OTU#1133                      | 0.0333 | 0    | 0     | 0    | 0.009396 | 95.02 |
| Paludibacter_OTU#1126                    | 0.0333 | 0    | 0     | 0    | 0.009396 | 95.03 |
| Allobaculum_OTU#1118                     | 0.0333 | 0    | 0     | 0    | 0.009396 | 95.04 |
| Limibacter_OTU#337                       | 0.0167 | 0.02 | 0     | 0    | 0.00906  | 95.05 |
| Paludibacter_OTU#332                     | 0.0167 | 0.02 | 0     | 0    | 0.00906  | 95.06 |
| Unclassified_Bacteroidetes_OTU#333       | 0.0167 | 0.02 | 0     | 0    | 0.00906  | 95.07 |
| Limibacter_OTU#327                       | 0.0167 | 0.02 | 0     | 0    | 0.00906  | 95.08 |
| Paludibacter_OTU#415                     | 0.0167 | 0.02 | 0     | 0    | 0.00906  | 95.09 |
| Unclassified_Bacteroidales_OTU#382       | 0.0167 | 0.02 | 0     | 0    | 0.00906  | 95.11 |

|                                         |        |      |       |      |          |       |
|-----------------------------------------|--------|------|-------|------|----------|-------|
| Tannerella_OTU#274                      | 0.0167 | 0.02 | 0     | 0    | 0.00906  | 95.12 |
| Barnesiella_OTU#1013                    | 0.0167 | 0    | 0     | 0.02 | 0.00906  | 95.13 |
| Paludibacter_OTU#965                    | 0.0167 | 0    | 0     | 0.02 | 0.00906  | 95.14 |
| Limibacter_OTU#9                        | 0.0167 | 0.02 | 0     | 0    | 0.00906  | 95.15 |
| Paludibacter_OTU#7                      | 0.0167 | 0.02 | 0     | 0    | 0.00906  | 95.16 |
| unclassified_OTU#903                    | 0.0167 | 0    | 0     | 0.02 | 0.00906  | 95.17 |
| Allobaculum_OTU#142                     | 0.0167 | 0.02 | 0     | 0    | 0.00906  | 95.18 |
| Paludibacter_OTU#108                    | 0.0167 | 0.02 | 0     | 0    | 0.00906  | 95.19 |
| Unclassified_Porphyrromonadaceae_OTU#83 | 0.0167 | 0.02 | 0     | 0    | 0.00906  | 95.2  |
| Paludibacter_OTU#977                    | 0.0167 | 0    | 0     | 0.02 | 0.00906  | 95.21 |
| Paludibacter_OTU#106                    | 0.0167 | 0.02 | 0     | 0    | 0.00906  | 95.23 |
| Paludibacter_OTU#952                    | 0.0167 | 0    | 0     | 0.02 | 0.00906  | 95.24 |
| Paraprevotella_OTU#533                  | 0      | 0    | 0.025 | 0    | 0.005369 | 95.24 |
| Anaerophaga_OTU#529                     | 0      | 0    | 0.025 | 0    | 0.005369 | 95.25 |
| Paludibacter_OTU#548                    | 0      | 0    | 0.025 | 0    | 0.005369 | 95.26 |
| Paludibacter_OTU#553                    | 0      | 0    | 0.025 | 0    | 0.005369 | 95.26 |
| Paludibacter_OTU#565                    | 0      | 0    | 0.025 | 0    | 0.005369 | 95.27 |
| Paludibacter_OTU#569                    | 0      | 0    | 0.025 | 0    | 0.005369 | 95.28 |
| Prevotella_OTU#561                      | 0      | 0    | 0.025 | 0    | 0.005369 | 95.28 |
| Barnesiella_OTU#445                     | 0      | 0    | 0.025 | 0    | 0.005369 | 95.29 |
| Anaerophaga_OTU#578                     | 0      | 0    | 0.025 | 0    | 0.005369 | 95.3  |
| Parasutterella_OTU#577                  | 0      | 0    | 0.025 | 0    | 0.005369 | 95.3  |
| Barnesiella_OTU#575                     | 0      | 0    | 0.025 | 0    | 0.005369 | 95.31 |
| Paludibacter_OTU#573                    | 0      | 0    | 0.025 | 0    | 0.005369 | 95.31 |
| Paludibacter_OTU#572                    | 0      | 0    | 0.025 | 0    | 0.005369 | 95.32 |
| Barnesiella_OTU#570                     | 0      | 0    | 0.025 | 0    | 0.005369 | 95.33 |
| Anaerophaga_OTU#538                     | 0      | 0    | 0.025 | 0    | 0.005369 | 95.33 |
| Paludibacter_OTU#568                    | 0      | 0    | 0.025 | 0    | 0.005369 | 95.34 |
| Oscillibacter_OTU#567                   | 0      | 0    | 0.025 | 0    | 0.005369 | 95.35 |
| Allobaculum_OTU#566                     | 0      | 0    | 0.025 | 0    | 0.005369 | 95.35 |
| Barnesiella_OTU#564                     | 0      | 0    | 0.025 | 0    | 0.005369 | 95.36 |
| Barnesiella_OTU#563                     | 0      | 0    | 0.025 | 0    | 0.005369 | 95.37 |
| Paludibacter_OTU#562                    | 0      | 0    | 0.025 | 0    | 0.005369 | 95.37 |
| Paludibacter_OTU#560                    | 0      | 0    | 0.025 | 0    | 0.005369 | 95.38 |
| Paludibacter_OTU#559                    | 0      | 0    | 0.025 | 0    | 0.005369 | 95.39 |
| Paludibacter_OTU#554                    | 0      | 0    | 0.025 | 0    | 0.005369 | 95.39 |
| Paludibacter_OTU#552                    | 0      | 0    | 0.025 | 0    | 0.005369 | 95.4  |
| Syntrophococcus_OTU#551                 | 0      | 0    | 0.025 | 0    | 0.005369 | 95.41 |
| Paludibacter_OTU#550                    | 0      | 0    | 0.025 | 0    | 0.005369 | 95.41 |
| Paludibacter_OTU#547                    | 0      | 0    | 0.025 | 0    | 0.005369 | 95.42 |
| Paludibacter_OTU#546                    | 0      | 0    | 0.025 | 0    | 0.005369 | 95.43 |

|                        |   |   |       |   |          |       |
|------------------------|---|---|-------|---|----------|-------|
| Paludibacter_OTU#545   | 0 | 0 | 0.025 | 0 | 0.005369 | 95.43 |
| Barnesiella_OTU#544    | 0 | 0 | 0.025 | 0 | 0.005369 | 95.44 |
| Paludibacter_OTU#543   | 0 | 0 | 0.025 | 0 | 0.005369 | 95.44 |
| Anaerophaga_OTU#542    | 0 | 0 | 0.025 | 0 | 0.005369 | 95.45 |
| Alistipes_OTU#539      | 0 | 0 | 0.025 | 0 | 0.005369 | 95.46 |
| Solobacterium_OTU#537  | 0 | 0 | 0.025 | 0 | 0.005369 | 95.46 |
| Barnesiella_OTU#536    | 0 | 0 | 0.025 | 0 | 0.005369 | 95.47 |
| Barnesiella_OTU#535    | 0 | 0 | 0.025 | 0 | 0.005369 | 95.48 |
| Paludibacter_OTU#532   | 0 | 0 | 0.025 | 0 | 0.005369 | 95.48 |
| Barnesiella_OTU#531    | 0 | 0 | 0.025 | 0 | 0.005369 | 95.49 |
| Paludibacter_OTU#530   | 0 | 0 | 0.025 | 0 | 0.005369 | 95.5  |
| Allobaculum_OTU#527    | 0 | 0 | 0.025 | 0 | 0.005369 | 95.5  |
| Odoribacter_OTU#526    | 0 | 0 | 0.025 | 0 | 0.005369 | 95.51 |
| Paludibacter_OTU#524   | 0 | 0 | 0.025 | 0 | 0.005369 | 95.52 |
| Barnesiella_OTU#523    | 0 | 0 | 0.025 | 0 | 0.005369 | 95.52 |
| Barnesiella_OTU#522    | 0 | 0 | 0.025 | 0 | 0.005369 | 95.53 |
| Paludibacter_OTU#521   | 0 | 0 | 0.025 | 0 | 0.005369 | 95.54 |
| Allobaculum_OTU#520    | 0 | 0 | 0.025 | 0 | 0.005369 | 95.54 |
| Alistipes_OTU#518      | 0 | 0 | 0.025 | 0 | 0.005369 | 95.55 |
| Limibacter_OTU#517     | 0 | 0 | 0.025 | 0 | 0.005369 | 95.56 |
| Roseburia_OTU#516      | 0 | 0 | 0.025 | 0 | 0.005369 | 95.56 |
| Rikenella_OTU#514      | 0 | 0 | 0.025 | 0 | 0.005369 | 95.57 |
| Rikenella_OTU#513      | 0 | 0 | 0.025 | 0 | 0.005369 | 95.57 |
| Alistipes_OTU#512      | 0 | 0 | 0.025 | 0 | 0.005369 | 95.58 |
| Paludibacter_OTU#509   | 0 | 0 | 0.025 | 0 | 0.005369 | 95.59 |
| Barnesiella_OTU#508    | 0 | 0 | 0.025 | 0 | 0.005369 | 95.59 |
| Oscillibacter_OTU#507  | 0 | 0 | 0.025 | 0 | 0.005369 | 95.6  |
| Aquiflexum_OTU#439     | 0 | 0 | 0.025 | 0 | 0.005369 | 95.61 |
| Sharpea_OTU#442        | 0 | 0 | 0.025 | 0 | 0.005369 | 95.61 |
| Xylanibacter_OTU#444   | 0 | 0 | 0.025 | 0 | 0.005369 | 95.62 |
| Paludibacter_OTU#443   | 0 | 0 | 0.025 | 0 | 0.005369 | 95.63 |
| Allobaculum_OTU#574    | 0 | 0 | 0.025 | 0 | 0.005369 | 95.63 |
| Paludibacter_OTU#486   | 0 | 0 | 0.025 | 0 | 0.005369 | 95.64 |
| Allobaculum_OTU#488    | 0 | 0 | 0.025 | 0 | 0.005369 | 95.65 |
| Oscillibacter_OTU#448  | 0 | 0 | 0.025 | 0 | 0.005369 | 95.65 |
| Paludibacter_OTU#490   | 0 | 0 | 0.025 | 0 | 0.005369 | 95.66 |
| Rikenella_OTU#489      | 0 | 0 | 0.025 | 0 | 0.005369 | 95.67 |
| Paludibacter_OTU#495   | 0 | 0 | 0.025 | 0 | 0.005369 | 95.67 |
| Acetitomaculum_OTU#484 | 0 | 0 | 0.025 | 0 | 0.005369 | 95.68 |
| Paludibacter_OTU#450   | 0 | 0 | 0.025 | 0 | 0.005369 | 95.69 |
| Paludibacter_OTU#446   | 0 | 0 | 0.025 | 0 | 0.005369 | 95.69 |

|                           |   |   |       |   |          |       |
|---------------------------|---|---|-------|---|----------|-------|
| Paludibacter_OTU#457      | 0 | 0 | 0.025 | 0 | 0.005369 | 95.7  |
| Garciella_OTU#454         | 0 | 0 | 0.025 | 0 | 0.005369 | 95.7  |
| Rikenella_OTU#461         | 0 | 0 | 0.025 | 0 | 0.005369 | 95.71 |
| Paludibacter_OTU#460      | 0 | 0 | 0.025 | 0 | 0.005369 | 95.72 |
| Parasutterella_OTU#501    | 0 | 0 | 0.025 | 0 | 0.005369 | 95.72 |
| Paludibacter_OTU#463      | 0 | 0 | 0.025 | 0 | 0.005369 | 95.73 |
| Paludibacter_OTU#482      | 0 | 0 | 0.025 | 0 | 0.005369 | 95.74 |
| Paludibacter_OTU#472      | 0 | 0 | 0.025 | 0 | 0.005369 | 95.74 |
| Paludibacter_OTU#479      | 0 | 0 | 0.025 | 0 | 0.005369 | 95.75 |
| Rikenella_OTU#477         | 0 | 0 | 0.025 | 0 | 0.005369 | 95.76 |
| Paludibacter_OTU#470      | 0 | 0 | 0.025 | 0 | 0.005369 | 95.76 |
| Solobacterium_OTU#510     | 0 | 0 | 0.025 | 0 | 0.005369 | 95.77 |
| Barnesiella_OTU#515       | 0 | 0 | 0.025 | 0 | 0.005369 | 95.78 |
| Paludibacter_OTU#519      | 0 | 0 | 0.025 | 0 | 0.005369 | 95.78 |
| Rikenella_OTU#505         | 0 | 0 | 0.025 | 0 | 0.005369 | 95.79 |
| Tepidanaerobacter_OTU#502 | 0 | 0 | 0.025 | 0 | 0.005369 | 95.8  |
| Allobaculum_OTU#498       | 0 | 0 | 0.025 | 0 | 0.005369 | 95.8  |
| Allobaculum_OTU#497       | 0 | 0 | 0.025 | 0 | 0.005369 | 95.81 |
| Allobaculum_OTU#494       | 0 | 0 | 0.025 | 0 | 0.005369 | 95.81 |
| Rikenella_OTU#492         | 0 | 0 | 0.025 | 0 | 0.005369 | 95.82 |
| Solobacterium_OTU#491     | 0 | 0 | 0.025 | 0 | 0.005369 | 95.83 |
| Sharpea_OTU#487           | 0 | 0 | 0.025 | 0 | 0.005369 | 95.83 |
| Allobaculum_OTU#485       | 0 | 0 | 0.025 | 0 | 0.005369 | 95.84 |
| Paraprevotella_OTU#483    | 0 | 0 | 0.025 | 0 | 0.005369 | 95.85 |
| Paludibacter_OTU#481      | 0 | 0 | 0.025 | 0 | 0.005369 | 95.85 |
| Oscillibacter_OTU#499     | 0 | 0 | 0.025 | 0 | 0.005369 | 95.86 |
| Anaerophaga_OTU#478       | 0 | 0 | 0.025 | 0 | 0.005369 | 95.87 |
| Limibacter_OTU#506        | 0 | 0 | 0.025 | 0 | 0.005369 | 95.87 |
| Paludibacter_OTU#476      | 0 | 0 | 0.025 | 0 | 0.005369 | 95.88 |
| Paludibacter_OTU#474      | 0 | 0 | 0.025 | 0 | 0.005369 | 95.89 |
| Barnesiella_OTU#473       | 0 | 0 | 0.025 | 0 | 0.005369 | 95.89 |
| Butyrlicimonas_OTU#471    | 0 | 0 | 0.025 | 0 | 0.005369 | 95.9  |
| Tannerella_OTU#469        | 0 | 0 | 0.025 | 0 | 0.005369 | 95.91 |
| Roseburia_OTU#467         | 0 | 0 | 0.025 | 0 | 0.005369 | 95.91 |
| Barnesiella_OTU#464       | 0 | 0 | 0.025 | 0 | 0.005369 | 95.92 |
| Paludibacter_OTU#462      | 0 | 0 | 0.025 | 0 | 0.005369 | 95.93 |
| Paludibacter_OTU#459      | 0 | 0 | 0.025 | 0 | 0.005369 | 95.93 |
| Paludibacter_OTU#455      | 0 | 0 | 0.025 | 0 | 0.005369 | 95.94 |
| Xylanibacter_OTU#453      | 0 | 0 | 0.025 | 0 | 0.005369 | 95.94 |
| Limibacter_OTU#452        | 0 | 0 | 0.025 | 0 | 0.005369 | 95.95 |
| Allobaculum_OTU#451       | 0 | 0 | 0.025 | 0 | 0.005369 | 95.96 |

|                        |   |   |       |   |          |       |
|------------------------|---|---|-------|---|----------|-------|
| Allobaculum_OTU#449    | 0 | 0 | 0.025 | 0 | 0.005369 | 95.96 |
| Rikenella_OTU#447      | 0 | 0 | 0.025 | 0 | 0.005369 | 95.97 |
| Paraprevotella_OTU#440 | 0 | 0 | 0.025 | 0 | 0.005369 | 95.98 |
| Barnesiella_OTU#438    | 0 | 0 | 0.025 | 0 | 0.005369 | 95.98 |
| Paludibacter_OTU#437   | 0 | 0 | 0.025 | 0 | 0.005369 | 95.99 |
| Tannerella_OTU#468     | 0 | 0 | 0.025 | 0 | 0.005369 | 96    |
| Paludibacter_OTU#602   | 0 | 0 | 0.025 | 0 | 0.005369 | 96    |
| Roseburia_OTU#599      | 0 | 0 | 0.025 | 0 | 0.005369 | 96.01 |
| Limibacter_OTU#595     | 0 | 0 | 0.025 | 0 | 0.005369 | 96.02 |
| Tannerella_OTU#591     | 0 | 0 | 0.025 | 0 | 0.005369 | 96.02 |
| Paludibacter_OTU#590   | 0 | 0 | 0.025 | 0 | 0.005369 | 96.03 |
| Paludibacter_OTU#589   | 0 | 0 | 0.025 | 0 | 0.005369 | 96.04 |
| Robinsoniella_OTU#588  | 0 | 0 | 0.025 | 0 | 0.005369 | 96.04 |
| Limibacter_OTU#586     | 0 | 0 | 0.025 | 0 | 0.005369 | 96.05 |
| Tuberibacillus_OTU#585 | 0 | 0 | 0.025 | 0 | 0.005369 | 96.06 |
| Paludibacter_OTU#581   | 0 | 0 | 0.025 | 0 | 0.005369 | 96.06 |
| Allobaculum_OTU#600    | 0 | 0 | 0.025 | 0 | 0.005369 | 96.07 |
| Barnesiella_OTU#603    | 0 | 0 | 0.025 | 0 | 0.005369 | 96.07 |
| Paludibacter_OTU#607   | 0 | 0 | 0.025 | 0 | 0.005369 | 96.08 |
| Tannerella_OTU#605     | 0 | 0 | 0.025 | 0 | 0.005369 | 96.09 |
| Barnesiella_OTU#609    | 0 | 0 | 0.025 | 0 | 0.005369 | 96.09 |
| Paludibacter_OTU#611   | 0 | 0 | 0.025 | 0 | 0.005369 | 96.1  |
| Rikenella_OTU#613      | 0 | 0 | 0.025 | 0 | 0.005369 | 96.11 |
| Barnesiella_OTU#614    | 0 | 0 | 0.025 | 0 | 0.005369 | 96.11 |
| Anaerophaga_OTU#616    | 0 | 0 | 0.025 | 0 | 0.005369 | 96.12 |
| Rikenella_OTU#648      | 0 | 0 | 0.025 | 0 | 0.005369 | 96.13 |
| Tannerella_OTU#617     | 0 | 0 | 0.025 | 0 | 0.005369 | 96.13 |
| Paludibacter_OTU#665   | 0 | 0 | 0.025 | 0 | 0.005369 | 96.14 |
| Allobaculum_OTU#667    | 0 | 0 | 0.025 | 0 | 0.005369 | 96.15 |
| Anaerophaga_OTU#643    | 0 | 0 | 0.025 | 0 | 0.005369 | 96.15 |
| Allobaculum_OTU#644    | 0 | 0 | 0.025 | 0 | 0.005369 | 96.16 |
| Rikenella_OTU#655      | 0 | 0 | 0.025 | 0 | 0.005369 | 96.17 |
| Paludibacter_OTU#612   | 0 | 0 | 0.025 | 0 | 0.005369 | 96.17 |
| Anaerophaga_OTU#663    | 0 | 0 | 0.025 | 0 | 0.005369 | 96.18 |
| Paludibacter_OTU#662   | 0 | 0 | 0.025 | 0 | 0.005369 | 96.19 |
| Paludibacter_OTU#661   | 0 | 0 | 0.025 | 0 | 0.005369 | 96.19 |
| Paludibacter_OTU#660   | 0 | 0 | 0.025 | 0 | 0.005369 | 96.2  |
| Paludibacter_OTU#659   | 0 | 0 | 0.025 | 0 | 0.005369 | 96.2  |
| Paludibacter_OTU#654   | 0 | 0 | 0.025 | 0 | 0.005369 | 96.21 |
| Paludibacter_OTU#647   | 0 | 0 | 0.025 | 0 | 0.005369 | 96.22 |
| Anaerophaga_OTU#656    | 0 | 0 | 0.025 | 0 | 0.005369 | 96.22 |

|                        |   |   |       |   |          |       |
|------------------------|---|---|-------|---|----------|-------|
| Paludibacter_OTU#651   | 0 | 0 | 0.025 | 0 | 0.005369 | 96.23 |
| Aminiphilus_OTU#652    | 0 | 0 | 0.025 | 0 | 0.005369 | 96.24 |
| Barnesiella_OTU#646    | 0 | 0 | 0.025 | 0 | 0.005369 | 96.24 |
| Paludibacter_OTU#645   | 0 | 0 | 0.025 | 0 | 0.005369 | 96.25 |
| Rikenella_OTU#641      | 0 | 0 | 0.025 | 0 | 0.005369 | 96.26 |
| Paludibacter_OTU#640   | 0 | 0 | 0.025 | 0 | 0.005369 | 96.26 |
| Tuberibacillus_OTU#639 | 0 | 0 | 0.025 | 0 | 0.005369 | 96.27 |
| Allobaculum_OTU#638    | 0 | 0 | 0.025 | 0 | 0.005369 | 96.28 |
| Paludibacter_OTU#634   | 0 | 0 | 0.025 | 0 | 0.005369 | 96.28 |
| Anaerophaga_OTU#632    | 0 | 0 | 0.025 | 0 | 0.005369 | 96.29 |
| Peptococcus_OTU#631    | 0 | 0 | 0.025 | 0 | 0.005369 | 96.3  |
| Paludibacter_OTU#630   | 0 | 0 | 0.025 | 0 | 0.005369 | 96.3  |
| Paludibacter_OTU#629   | 0 | 0 | 0.025 | 0 | 0.005369 | 96.31 |
| Paludibacter_OTU#627   | 0 | 0 | 0.025 | 0 | 0.005369 | 96.31 |
| Paludibacter_OTU#626   | 0 | 0 | 0.025 | 0 | 0.005369 | 96.32 |
| Paludibacter_OTU#625   | 0 | 0 | 0.025 | 0 | 0.005369 | 96.33 |
| Paludibacter_OTU#622   | 0 | 0 | 0.025 | 0 | 0.005369 | 96.33 |
| Barnesiella_OTU#621    | 0 | 0 | 0.025 | 0 | 0.005369 | 96.34 |
| Barnesiella_OTU#620    | 0 | 0 | 0.025 | 0 | 0.005369 | 96.35 |
| Rikenella_OTU#618      | 0 | 0 | 0.025 | 0 | 0.005369 | 96.35 |
| Paludibacter_OTU#686   | 0 | 0 | 0.025 | 0 | 0.005369 | 96.36 |
| Paludibacter_OTU#684   | 0 | 0 | 0.025 | 0 | 0.005369 | 96.37 |
| Paludibacter_OTU#683   | 0 | 0 | 0.025 | 0 | 0.005369 | 96.37 |
| Barnesiella_OTU#692    | 0 | 0 | 0.025 | 0 | 0.005369 | 96.38 |
| Limibacter_OTU#695     | 0 | 0 | 0.025 | 0 | 0.005369 | 96.39 |
| Paludibacter_OTU#693   | 0 | 0 | 0.025 | 0 | 0.005369 | 96.39 |
| Limibacter_OTU#700     | 0 | 0 | 0.025 | 0 | 0.005369 | 96.4  |
| Paludibacter_OTU#705   | 0 | 0 | 0.025 | 0 | 0.005369 | 96.41 |
| Paludibacter_OTU#704   | 0 | 0 | 0.025 | 0 | 0.005369 | 96.41 |
| Paludibacter_OTU#706   | 0 | 0 | 0.025 | 0 | 0.005369 | 96.42 |
| Barnesiella_OTU#702    | 0 | 0 | 0.025 | 0 | 0.005369 | 96.43 |
| Barnesiella_OTU#676    | 0 | 0 | 0.025 | 0 | 0.005369 | 96.43 |
| Barnesiella_OTU#677    | 0 | 0 | 0.025 | 0 | 0.005369 | 96.44 |
| Rikenella_OTU#679      | 0 | 0 | 0.025 | 0 | 0.005369 | 96.44 |
| Paludibacter_OTU#680   | 0 | 0 | 0.025 | 0 | 0.005369 | 96.45 |
| Anaerophaga_OTU#681    | 0 | 0 | 0.025 | 0 | 0.005369 | 96.46 |
| Paludibacter_OTU#749   | 0 | 0 | 0.025 | 0 | 0.005369 | 96.46 |
| Paludibacter_OTU#747   | 0 | 0 | 0.025 | 0 | 0.005369 | 96.47 |
| Barnesiella_OTU#745    | 0 | 0 | 0.025 | 0 | 0.005369 | 96.48 |
| Barnesiella_OTU#744    | 0 | 0 | 0.025 | 0 | 0.005369 | 96.48 |
| Pseudozobellia_OTU#743 | 0 | 0 | 0.025 | 0 | 0.005369 | 96.49 |

|                          |   |   |       |      |          |       |
|--------------------------|---|---|-------|------|----------|-------|
| Limibacter_OTU#739       | 0 | 0 | 0.025 | 0    | 0.005369 | 96.5  |
| Paludibacter_OTU#737     | 0 | 0 | 0.025 | 0    | 0.005369 | 96.5  |
| Paludibacter_OTU#733     | 0 | 0 | 0.025 | 0    | 0.005369 | 96.51 |
| Paludibacter_OTU#731     | 0 | 0 | 0.025 | 0    | 0.005369 | 96.52 |
| Barnesiella_OTU#729      | 0 | 0 | 0.025 | 0    | 0.005369 | 96.52 |
| Alistipes_OTU#728        | 0 | 0 | 0.025 | 0    | 0.005369 | 96.53 |
| Paludibacter_OTU#727     | 0 | 0 | 0.025 | 0    | 0.005369 | 96.54 |
| Paludibacter_OTU#726     | 0 | 0 | 0.025 | 0    | 0.005369 | 96.54 |
| Paludibacter_OTU#724     | 0 | 0 | 0.025 | 0    | 0.005369 | 96.55 |
| Paludibacter_OTU#720     | 0 | 0 | 0.025 | 0    | 0.005369 | 96.56 |
| Paludibacter_OTU#719     | 0 | 0 | 0.025 | 0    | 0.005369 | 96.56 |
| Dorea_OTU#718            | 0 | 0 | 0.025 | 0    | 0.005369 | 96.57 |
| Paludibacter_OTU#717     | 0 | 0 | 0.025 | 0    | 0.005369 | 96.57 |
| Paludibacter_OTU#716     | 0 | 0 | 0.025 | 0    | 0.005369 | 96.58 |
| Barnesiella_OTU#715      | 0 | 0 | 0.025 | 0    | 0.005369 | 96.59 |
| Proteiniphilum_OTU#714   | 0 | 0 | 0.025 | 0    | 0.005369 | 96.59 |
| Barnesiella_OTU#710      | 0 | 0 | 0.025 | 0    | 0.005369 | 96.6  |
| Dorea_OTU#703            | 0 | 0 | 0.025 | 0    | 0.005369 | 96.61 |
| Anaerophaga_OTU#699      | 0 | 0 | 0.025 | 0    | 0.005369 | 96.61 |
| Denitrobacterium_OTU#698 | 0 | 0 | 0.025 | 0    | 0.005369 | 96.62 |
| Paludibacter_OTU#691     | 0 | 0 | 0.025 | 0    | 0.005369 | 96.63 |
| Paludibacter_OTU#682     | 0 | 0 | 0.025 | 0    | 0.005369 | 96.63 |
| Paludibacter_OTU#678     | 0 | 0 | 0.025 | 0    | 0.005369 | 96.64 |
| Barnesiella_OTU#675      | 0 | 0 | 0.025 | 0    | 0.005369 | 96.65 |
| Limibacter_OTU#674       | 0 | 0 | 0.025 | 0    | 0.005369 | 96.65 |
| Paludibacter_OTU#673     | 0 | 0 | 0.025 | 0    | 0.005369 | 96.66 |
| Rikenella_OTU#672        | 0 | 0 | 0.025 | 0    | 0.005369 | 96.67 |
| Paludibacter_OTU#670     | 0 | 0 | 0.025 | 0    | 0.005369 | 96.67 |
| Paludibacter_OTU#668     | 0 | 0 | 0.025 | 0    | 0.005369 | 96.68 |
| Paludibacter_OTU#855     | 0 | 0 | 0     | 0.02 | 0.005034 | 96.68 |
| Parasutterella_OTU#852   | 0 | 0 | 0     | 0.02 | 0.005034 | 96.69 |
| Paludibacter_OTU#840     | 0 | 0 | 0     | 0.02 | 0.005034 | 96.7  |
| Tannerella_OTU#828       | 0 | 0 | 0     | 0.02 | 0.005034 | 96.7  |
| Paludibacter_OTU#824     | 0 | 0 | 0     | 0.02 | 0.005034 | 96.71 |
| Barnesiella_OTU#821      | 0 | 0 | 0     | 0.02 | 0.005034 | 96.72 |
| Bulleidia_OTU#820        | 0 | 0 | 0     | 0.02 | 0.005034 | 96.72 |
| Paludibacter_OTU#818     | 0 | 0 | 0     | 0.02 | 0.005034 | 96.73 |
| Barnesiella_OTU#817      | 0 | 0 | 0     | 0.02 | 0.005034 | 96.73 |
| Paludibacter_OTU#814     | 0 | 0 | 0     | 0.02 | 0.005034 | 96.74 |
| Limibacter_OTU#812       | 0 | 0 | 0     | 0.02 | 0.005034 | 96.75 |
| Oscillibacter_OTU#811    | 0 | 0 | 0     | 0.02 | 0.005034 | 96.75 |

|                          |   |   |   |      |          |       |
|--------------------------|---|---|---|------|----------|-------|
| Barnesiella_OTU#810      | 0 | 0 | 0 | 0.02 | 0.005034 | 96.76 |
| Alistipes_OTU#809        | 0 | 0 | 0 | 0.02 | 0.005034 | 96.76 |
| Paludibacter_OTU#807     | 0 | 0 | 0 | 0.02 | 0.005034 | 96.77 |
| Paraprevotella_OTU#805   | 0 | 0 | 0 | 0.02 | 0.005034 | 96.78 |
| Paludibacter_OTU#801     | 0 | 0 | 0 | 0.02 | 0.005034 | 96.78 |
| Barnesiella_OTU#800      | 0 | 0 | 0 | 0.02 | 0.005034 | 96.79 |
| Paludibacter_OTU#796     | 0 | 0 | 0 | 0.02 | 0.005034 | 96.79 |
| Barnesiella_OTU#795      | 0 | 0 | 0 | 0.02 | 0.005034 | 96.8  |
| Paludibacter_OTU#794     | 0 | 0 | 0 | 0.02 | 0.005034 | 96.81 |
| Allobaculum_OTU#793      | 0 | 0 | 0 | 0.02 | 0.005034 | 96.81 |
| Barnesiella_OTU#792      | 0 | 0 | 0 | 0.02 | 0.005034 | 96.82 |
| Paludibacter_OTU#791     | 0 | 0 | 0 | 0.02 | 0.005034 | 96.82 |
| Rikenella_OTU#788        | 0 | 0 | 0 | 0.02 | 0.005034 | 96.83 |
| Paludibacter_OTU#787     | 0 | 0 | 0 | 0.02 | 0.005034 | 96.84 |
| Paludibacter_OTU#785     | 0 | 0 | 0 | 0.02 | 0.005034 | 96.84 |
| Denitrobacterium_OTU#784 | 0 | 0 | 0 | 0.02 | 0.005034 | 96.85 |
| Paludibacter_OTU#782     | 0 | 0 | 0 | 0.02 | 0.005034 | 96.86 |
| Paludibacter_OTU#781     | 0 | 0 | 0 | 0.02 | 0.005034 | 96.86 |
| Hallella_OTU#780         | 0 | 0 | 0 | 0.02 | 0.005034 | 96.87 |
| Barnesiella_OTU#779      | 0 | 0 | 0 | 0.02 | 0.005034 | 96.87 |
| Barnesiella_OTU#778      | 0 | 0 | 0 | 0.02 | 0.005034 | 96.88 |
| Butyricimonas_OTU#777    | 0 | 0 | 0 | 0.02 | 0.005034 | 96.89 |
| Limibacter_OTU#775       | 0 | 0 | 0 | 0.02 | 0.005034 | 96.89 |
| Paludibacter_OTU#771     | 0 | 0 | 0 | 0.02 | 0.005034 | 96.9  |
| Rikenella_OTU#770        | 0 | 0 | 0 | 0.02 | 0.005034 | 96.9  |
| Rikenella_OTU#769        | 0 | 0 | 0 | 0.02 | 0.005034 | 96.91 |
| Rikenella_OTU#768        | 0 | 0 | 0 | 0.02 | 0.005034 | 96.92 |
| Rikenella_OTU#764        | 0 | 0 | 0 | 0.02 | 0.005034 | 96.92 |
| Barnesiella_OTU#763      | 0 | 0 | 0 | 0.02 | 0.005034 | 96.93 |
| Paludibacter_OTU#762     | 0 | 0 | 0 | 0.02 | 0.005034 | 96.93 |
| Paludibacter_OTU#761     | 0 | 0 | 0 | 0.02 | 0.005034 | 96.94 |
| Limibacter_OTU#760       | 0 | 0 | 0 | 0.02 | 0.005034 | 96.95 |
| Paludibacter_OTU#759     | 0 | 0 | 0 | 0.02 | 0.005034 | 96.95 |
| Barnesiella_OTU#757      | 0 | 0 | 0 | 0.02 | 0.005034 | 96.96 |
| Barnesiella_OTU#756      | 0 | 0 | 0 | 0.02 | 0.005034 | 96.96 |
| Paludibacter_OTU#755     | 0 | 0 | 0 | 0.02 | 0.005034 | 96.97 |
| Turicibacter_OTU#754     | 0 | 0 | 0 | 0.02 | 0.005034 | 96.98 |
| Paludibacter_OTU#752     | 0 | 0 | 0 | 0.02 | 0.005034 | 96.98 |
| Barnesiella_OTU#750      | 0 | 0 | 0 | 0.02 | 0.005034 | 96.99 |
| Tannerella_OTU#822       | 0 | 0 | 0 | 0.02 | 0.005034 | 97    |
| Schwartzia_OTU#825       | 0 | 0 | 0 | 0.02 | 0.005034 | 97    |



|                        |   |      |   |      |          |       |
|------------------------|---|------|---|------|----------|-------|
| Rikenella_OTU#826      | 0 | 0    | 0 | 0.02 | 0.005034 | 97.01 |
| Pseudozobellia_OTU#827 | 0 | 0    | 0 | 0.02 | 0.005034 | 97.01 |
| Paludibacter_OTU#836   | 0 | 0    | 0 | 0.02 | 0.005034 | 97.02 |
| Paludibacter_OTU#832   | 0 | 0    | 0 | 0.02 | 0.005034 | 97.03 |
| Limibacter_OTU#843     | 0 | 0    | 0 | 0.02 | 0.005034 | 97.03 |
| Barnesiella_OTU#851    | 0 | 0    | 0 | 0.02 | 0.005034 | 97.04 |
| Paludibacter_OTU#845   | 0 | 0    | 0 | 0.02 | 0.005034 | 97.04 |
| Barnesiella_OTU#856    | 0 | 0    | 0 | 0.02 | 0.005034 | 97.05 |
| Paludibacter_OTU#823   | 0 | 0    | 0 | 0.02 | 0.005034 | 97.06 |
| Parasutterella_OTU#324 | 0 | 0.02 | 0 | 0    | 0.005034 | 97.06 |
| Barnesiella_OTU#342    | 0 | 0.02 | 0 | 0    | 0.005034 | 97.07 |
| Barnesiella_OTU#357    | 0 | 0.02 | 0 | 0    | 0.005034 | 97.07 |
| Paludibacter_OTU#361   | 0 | 0.02 | 0 | 0    | 0.005034 | 97.08 |
| Rikenella_OTU#352      | 0 | 0.02 | 0 | 0    | 0.005034 | 97.09 |
| Hallella_OTU#931       | 0 | 0    | 0 | 0.02 | 0.005034 | 97.09 |
| Paludibacter_OTU#930   | 0 | 0    | 0 | 0.02 | 0.005034 | 97.1  |
| Tannerella_OTU#927     | 0 | 0    | 0 | 0.02 | 0.005034 | 97.1  |
| Barnesiella_OTU#926    | 0 | 0    | 0 | 0.02 | 0.005034 | 97.11 |
| Paludibacter_OTU#924   | 0 | 0    | 0 | 0.02 | 0.005034 | 97.12 |
| Paludibacter_OTU#919   | 0 | 0    | 0 | 0.02 | 0.005034 | 97.12 |
| Paludibacter_OTU#918   | 0 | 0    | 0 | 0.02 | 0.005034 | 97.13 |
| Paludibacter_OTU#916   | 0 | 0    | 0 | 0.02 | 0.005034 | 97.14 |
| Paludibacter_OTU#915   | 0 | 0    | 0 | 0.02 | 0.005034 | 97.14 |
| Rikenella_OTU#912      | 0 | 0    | 0 | 0.02 | 0.005034 | 97.15 |
| Tannerella_OTU#911     | 0 | 0    | 0 | 0.02 | 0.005034 | 97.15 |
| Barnesiella_OTU#909    | 0 | 0    | 0 | 0.02 | 0.005034 | 97.16 |
| Zhangella_OTU#907      | 0 | 0    | 0 | 0.02 | 0.005034 | 97.17 |
| Paludibacter_OTU#904   | 0 | 0    | 0 | 0.02 | 0.005034 | 97.17 |
| Tannerella_OTU#901     | 0 | 0    | 0 | 0.02 | 0.005034 | 97.18 |
| Paludibacter_OTU#899   | 0 | 0    | 0 | 0.02 | 0.005034 | 97.18 |
| Paludibacter_OTU#898   | 0 | 0    | 0 | 0.02 | 0.005034 | 97.19 |
| Paludibacter_OTU#897   | 0 | 0    | 0 | 0.02 | 0.005034 | 97.2  |
| Rikenella_OTU#896      | 0 | 0    | 0 | 0.02 | 0.005034 | 97.2  |
| Paludibacter_OTU#895   | 0 | 0    | 0 | 0.02 | 0.005034 | 97.21 |
| Limibacter_OTU#893     | 0 | 0    | 0 | 0.02 | 0.005034 | 97.21 |
| Peptococcus_OTU#892    | 0 | 0    | 0 | 0.02 | 0.005034 | 97.22 |
| Pseudozobellia_OTU#890 | 0 | 0    | 0 | 0.02 | 0.005034 | 97.23 |
| Barnesiella_OTU#889    | 0 | 0    | 0 | 0.02 | 0.005034 | 97.23 |
| Paludibacter_OTU#888   | 0 | 0    | 0 | 0.02 | 0.005034 | 97.24 |
| Paludibacter_OTU#885   | 0 | 0    | 0 | 0.02 | 0.005034 | 97.24 |
| Barnesiella_OTU#884    | 0 | 0    | 0 | 0.02 | 0.005034 | 97.25 |

|                        |   |      |   |      |          |       |
|------------------------|---|------|---|------|----------|-------|
| Paludibacter_OTU#883   | 0 | 0    | 0 | 0.02 | 0.005034 | 97.26 |
| Anaerophaga_OTU#881    | 0 | 0    | 0 | 0.02 | 0.005034 | 97.26 |
| Tannerella_OTU#878     | 0 | 0    | 0 | 0.02 | 0.005034 | 97.27 |
| Paludibacter_OTU#877   | 0 | 0    | 0 | 0.02 | 0.005034 | 97.28 |
| Paludibacter_OTU#873   | 0 | 0    | 0 | 0.02 | 0.005034 | 97.28 |
| Limibacter_OTU#872     | 0 | 0    | 0 | 0.02 | 0.005034 | 97.29 |
| Blautia_OTU#871        | 0 | 0    | 0 | 0.02 | 0.005034 | 97.29 |
| Barnesiella_OTU#870    | 0 | 0    | 0 | 0.02 | 0.005034 | 97.3  |
| Barnesiella_OTU#869    | 0 | 0    | 0 | 0.02 | 0.005034 | 97.31 |
| Anaerophaga_OTU#868    | 0 | 0    | 0 | 0.02 | 0.005034 | 97.31 |
| Alkaliflexus_OTU#304   | 0 | 0.02 | 0 | 0    | 0.005034 | 97.32 |
| Enterorhabdus_OTU#309  | 0 | 0.02 | 0 | 0    | 0.005034 | 97.32 |
| Paludibacter_OTU#362   | 0 | 0.02 | 0 | 0    | 0.005034 | 97.33 |
| Coprococcus_OTU#360    | 0 | 0.02 | 0 | 0    | 0.005034 | 97.34 |
| Adlercreutzia_OTU#359  | 0 | 0.02 | 0 | 0    | 0.005034 | 97.34 |
| Dorea_OTU#358          | 0 | 0.02 | 0 | 0    | 0.005034 | 97.35 |
| Adlercreutzia_OTU#355  | 0 | 0.02 | 0 | 0    | 0.005034 | 97.35 |
| Paludibacter_OTU#354   | 0 | 0.02 | 0 | 0    | 0.005034 | 97.36 |
| Ureaplasma_OTU#353     | 0 | 0.02 | 0 | 0    | 0.005034 | 97.37 |
| Parasutterella_OTU#351 | 0 | 0.02 | 0 | 0    | 0.005034 | 97.37 |
| Alistipes_OTU#350      | 0 | 0.02 | 0 | 0    | 0.005034 | 97.38 |
| Limibacter_OTU#349     | 0 | 0.02 | 0 | 0    | 0.005034 | 97.38 |
| Barnesiella_OTU#348    | 0 | 0.02 | 0 | 0    | 0.005034 | 97.39 |
| Paludibacter_OTU#346   | 0 | 0.02 | 0 | 0    | 0.005034 | 97.4  |
| Paludibacter_OTU#345   | 0 | 0.02 | 0 | 0    | 0.005034 | 97.4  |
| Paludibacter_OTU#341   | 0 | 0.02 | 0 | 0    | 0.005034 | 97.41 |
| Barnesiella_OTU#339    | 0 | 0.02 | 0 | 0    | 0.005034 | 97.42 |
| Parasutterella_OTU#338 | 0 | 0.02 | 0 | 0    | 0.005034 | 97.42 |
| Paludibacter_OTU#336   | 0 | 0.02 | 0 | 0    | 0.005034 | 97.43 |
| Paludibacter_OTU#335   | 0 | 0.02 | 0 | 0    | 0.005034 | 97.43 |
| Parasutterella_OTU#331 | 0 | 0.02 | 0 | 0    | 0.005034 | 97.44 |
| Limibacter_OTU#323     | 0 | 0.02 | 0 | 0    | 0.005034 | 97.45 |
| Paludibacter_OTU#322   | 0 | 0.02 | 0 | 0    | 0.005034 | 97.45 |
| Barnesiella_OTU#321    | 0 | 0.02 | 0 | 0    | 0.005034 | 97.46 |
| Limibacter_OTU#320     | 0 | 0.02 | 0 | 0    | 0.005034 | 97.46 |
| Parasutterella_OTU#319 | 0 | 0.02 | 0 | 0    | 0.005034 | 97.47 |
| Barnesiella_OTU#316    | 0 | 0.02 | 0 | 0    | 0.005034 | 97.48 |
| Anaerotruncus_OTU#315  | 0 | 0.02 | 0 | 0    | 0.005034 | 97.48 |
| Barnesiella_OTU#313    | 0 | 0.02 | 0 | 0    | 0.005034 | 97.49 |
| Parasutterella_OTU#312 | 0 | 0.02 | 0 | 0    | 0.005034 | 97.49 |
| Paludibacter_OTU#311   | 0 | 0.02 | 0 | 0    | 0.005034 | 97.5  |

|                           |   |      |   |      |          |       |
|---------------------------|---|------|---|------|----------|-------|
| Paludibacter_OTU#308      | 0 | 0.02 | 0 | 0    | 0.005034 | 97.51 |
| Streptophyta_OTU#307      | 0 | 0.02 | 0 | 0    | 0.005034 | 97.51 |
| Streptococcus_OTU#306     | 0 | 0.02 | 0 | 0    | 0.005034 | 97.52 |
| Paludibacter_OTU#303      | 0 | 0.02 | 0 | 0    | 0.005034 | 97.52 |
| Limibacter_OTU#302        | 0 | 0.02 | 0 | 0    | 0.005034 | 97.53 |
| Paludibacter_OTU#301      | 0 | 0.02 | 0 | 0    | 0.005034 | 97.54 |
| Blautia_OTU#300           | 0 | 0.02 | 0 | 0    | 0.005034 | 97.54 |
| Limibacter_OTU#299        | 0 | 0.02 | 0 | 0    | 0.005034 | 97.55 |
| Adlercreutzia_OTU#298     | 0 | 0.02 | 0 | 0    | 0.005034 | 97.56 |
| Paludibacter_OTU#297      | 0 | 0.02 | 0 | 0    | 0.005034 | 97.56 |
| Lawsonia_OTU#296          | 0 | 0.02 | 0 | 0    | 0.005034 | 97.57 |
| Paludibacter_OTU#887      | 0 | 0    | 0 | 0.02 | 0.005034 | 97.57 |
| Butyricimonas_OTU#891     | 0 | 0    | 0 | 0.02 | 0.005034 | 97.58 |
| Aquiflexum_OTU#908        | 0 | 0    | 0 | 0.02 | 0.005034 | 97.59 |
| Barnesiella_OTU#900       | 0 | 0    | 0 | 0.02 | 0.005034 | 97.59 |
| Paludibacter_OTU#882      | 0 | 0    | 0 | 0.02 | 0.005034 | 97.6  |
| Anaerophaga_OTU#914       | 0 | 0    | 0 | 0.02 | 0.005034 | 97.6  |
| Paludibacter_OTU#928      | 0 | 0    | 0 | 0.02 | 0.005034 | 97.61 |
| Anaerophaga_OTU#968       | 0 | 0    | 0 | 0.02 | 0.005034 | 97.62 |
| Paludibacter_OTU#964      | 0 | 0    | 0 | 0.02 | 0.005034 | 97.62 |
| Paludibacter_OTU#958      | 0 | 0    | 0 | 0.02 | 0.005034 | 97.63 |
| Paludibacter_OTU#954      | 0 | 0    | 0 | 0.02 | 0.005034 | 97.63 |
| Ethanoligenens_OTU#951    | 0 | 0    | 0 | 0.02 | 0.005034 | 97.64 |
| Paludibacter_OTU#950      | 0 | 0    | 0 | 0.02 | 0.005034 | 97.65 |
| Paludibacter_OTU#948      | 0 | 0    | 0 | 0.02 | 0.005034 | 97.65 |
| Rikenella_OTU#946         | 0 | 0    | 0 | 0.02 | 0.005034 | 97.66 |
| Barnesiella_OTU#944       | 0 | 0    | 0 | 0.02 | 0.005034 | 97.66 |
| Anaerophaga_OTU#942       | 0 | 0    | 0 | 0.02 | 0.005034 | 97.67 |
| Paludibacter_OTU#940      | 0 | 0    | 0 | 0.02 | 0.005034 | 97.68 |
| Paludibacter_OTU#937      | 0 | 0    | 0 | 0.02 | 0.005034 | 97.68 |
| Paludibacter_OTU#933      | 0 | 0    | 0 | 0.02 | 0.005034 | 97.69 |
| Prevotella_OTU#934        | 0 | 0    | 0 | 0.02 | 0.005034 | 97.7  |
| Paludibacter_OTU#943      | 0 | 0    | 0 | 0.02 | 0.005034 | 97.7  |
| Rikenella_OTU#941         | 0 | 0    | 0 | 0.02 | 0.005034 | 97.71 |
| Rikenella_OTU#947         | 0 | 0    | 0 | 0.02 | 0.005034 | 97.71 |
| Barnesiella_OTU#945       | 0 | 0    | 0 | 0.02 | 0.005034 | 97.72 |
| Anaerophaga_OTU#938       | 0 | 0    | 0 | 0.02 | 0.005034 | 97.73 |
| Paludibacter_OTU#957      | 0 | 0    | 0 | 0.02 | 0.005034 | 97.73 |
| Salsuginibacillus_OTU#956 | 0 | 0    | 0 | 0.02 | 0.005034 | 97.74 |
| Parasutterella_OTU#955    | 0 | 0    | 0 | 0.02 | 0.005034 | 97.74 |
| Barnesiella_OTU#953       | 0 | 0    | 0 | 0.02 | 0.005034 | 97.75 |

|                          |   |      |   |      |          |       |
|--------------------------|---|------|---|------|----------|-------|
| Paludibacter_OTU#972     | 0 | 0    | 0 | 0.02 | 0.005034 | 97.76 |
| Paludibacter_OTU#969     | 0 | 0    | 0 | 0.02 | 0.005034 | 97.76 |
| Paludibacter_OTU#984     | 0 | 0    | 0 | 0.02 | 0.005034 | 97.77 |
| Anaerotruncus_OTU#436    | 0 | 0.02 | 0 | 0    | 0.005034 | 97.77 |
| Anaerophaga_OTU#988      | 0 | 0    | 0 | 0.02 | 0.005034 | 97.78 |
| Paludibacter_OTU#973     | 0 | 0    | 0 | 0.02 | 0.005034 | 97.79 |
| Paludibacter_OTU#967     | 0 | 0    | 0 | 0.02 | 0.005034 | 97.79 |
| Lachnobacterium_OTU#368  | 0 | 0.02 | 0 | 0    | 0.005034 | 97.8  |
| Anaerotruncus_OTU#380    | 0 | 0.02 | 0 | 0    | 0.005034 | 97.8  |
| Acetitomaculum_OTU#371   | 0 | 0.02 | 0 | 0    | 0.005034 | 97.81 |
| Dorea_OTU#390            | 0 | 0.02 | 0 | 0    | 0.005034 | 97.82 |
| Paludibacter_OTU#432     | 0 | 0.02 | 0 | 0    | 0.005034 | 97.82 |
| Paludibacter_OTU#431     | 0 | 0.02 | 0 | 0    | 0.005034 | 97.83 |
| Limibacter_OTU#429       | 0 | 0.02 | 0 | 0    | 0.005034 | 97.84 |
| Flexithrix_OTU#428       | 0 | 0.02 | 0 | 0    | 0.005034 | 97.84 |
| Paludibacter_OTU#427     | 0 | 0.02 | 0 | 0    | 0.005034 | 97.85 |
| Coprococcus_OTU#425      | 0 | 0.02 | 0 | 0    | 0.005034 | 97.85 |
| Syntrophococcus_OTU#422  | 0 | 0.02 | 0 | 0    | 0.005034 | 97.86 |
| Paludibacter_OTU#416     | 0 | 0.02 | 0 | 0    | 0.005034 | 97.87 |
| Hallella_OTU#412         | 0 | 0.02 | 0 | 0    | 0.005034 | 97.87 |
| Paludibacter_OTU#398     | 0 | 0.02 | 0 | 0    | 0.005034 | 97.88 |
| Anaerotruncus_OTU#410    | 0 | 0.02 | 0 | 0    | 0.005034 | 97.88 |
| Roseburia_OTU#408        | 0 | 0.02 | 0 | 0    | 0.005034 | 97.89 |
| Limibacter_OTU#401       | 0 | 0.02 | 0 | 0    | 0.005034 | 97.9  |
| Syntrophococcus_OTU#399  | 0 | 0.02 | 0 | 0    | 0.005034 | 97.9  |
| Paludibacter_OTU#394     | 0 | 0.02 | 0 | 0    | 0.005034 | 97.91 |
| Paludibacter_OTU#409     | 0 | 0.02 | 0 | 0    | 0.005034 | 97.91 |
| Paludibacter_OTU#396     | 0 | 0.02 | 0 | 0    | 0.005034 | 97.92 |
| Anaerostipes_OTU#393     | 0 | 0.02 | 0 | 0    | 0.005034 | 97.93 |
| Unclassified_TM7_OTU#391 | 0 | 0.02 | 0 | 0    | 0.005034 | 97.93 |
| Dorea_OTU#406            | 0 | 0.02 | 0 | 0    | 0.005034 | 97.94 |
| Anaerotruncus_OTU#389    | 0 | 0.02 | 0 | 0    | 0.005034 | 97.94 |
| Dorea_OTU#388            | 0 | 0.02 | 0 | 0    | 0.005034 | 97.95 |
| Coprococcus_OTU#387      | 0 | 0.02 | 0 | 0    | 0.005034 | 97.96 |
| Dorea_OTU#386            | 0 | 0.02 | 0 | 0    | 0.005034 | 97.96 |
| Paludibacter_OTU#385     | 0 | 0.02 | 0 | 0    | 0.005034 | 97.97 |
| Anaerophaga_OTU#383      | 0 | 0.02 | 0 | 0    | 0.005034 | 97.98 |
| Limibacter_OTU#411       | 0 | 0.02 | 0 | 0    | 0.005034 | 97.98 |
| Roseburia_OTU#379        | 0 | 0.02 | 0 | 0    | 0.005034 | 97.99 |
| Lactonifactor_OTU#378    | 0 | 0.02 | 0 | 0    | 0.005034 | 97.99 |
| Syntrophococcus_OTU#374  | 0 | 0.02 | 0 | 0    | 0.005034 | 98    |

|                             |   |      |   |      |          |       |
|-----------------------------|---|------|---|------|----------|-------|
| Paludibacter_OTU#373        | 0 | 0.02 | 0 | 0    | 0.005034 | 98.01 |
| Marvinbryantia_OTU#372      | 0 | 0.02 | 0 | 0    | 0.005034 | 98.01 |
| Limibacter_OTU#419          | 0 | 0.02 | 0 | 0    | 0.005034 | 98.02 |
| Tannerella_OTU#369          | 0 | 0.02 | 0 | 0    | 0.005034 | 98.02 |
| Unclassified_TM7_OTU#367    | 0 | 0.02 | 0 | 0    | 0.005034 | 98.03 |
| Roseburia_OTU#424           | 0 | 0.02 | 0 | 0    | 0.005034 | 98.04 |
| Limibacter_OTU#366          | 0 | 0.02 | 0 | 0    | 0.005034 | 98.04 |
| Oscillibacter_OTU#365       | 0 | 0.02 | 0 | 0    | 0.005034 | 98.05 |
| Roseburia_OTU#363           | 0 | 0.02 | 0 | 0    | 0.005034 | 98.05 |
| Proteiniphilum_OTU#423      | 0 | 0.02 | 0 | 0    | 0.005034 | 98.06 |
| Robinsoniella_OTU#413       | 0 | 0.02 | 0 | 0    | 0.005034 | 98.07 |
| Anaerophaga_OTU#993         | 0 | 0    | 0 | 0.02 | 0.005034 | 98.07 |
| Paludibacter_OTU#990        | 0 | 0    | 0 | 0.02 | 0.005034 | 98.08 |
| Anaerophaga_OTU#962         | 0 | 0    | 0 | 0.02 | 0.005034 | 98.09 |
| Paludibacter_OTU#987        | 0 | 0    | 0 | 0.02 | 0.005034 | 98.09 |
| Blautia_OTU#986             | 0 | 0    | 0 | 0.02 | 0.005034 | 98.1  |
| Asaccharobacter_OTU#985     | 0 | 0    | 0 | 0.02 | 0.005034 | 98.1  |
| Dorea_OTU#982               | 0 | 0    | 0 | 0.02 | 0.005034 | 98.11 |
| Barnesiella_OTU#980         | 0 | 0    | 0 | 0.02 | 0.005034 | 98.12 |
| Paludibacter_OTU#974        | 0 | 0    | 0 | 0.02 | 0.005034 | 98.12 |
| Coprococcus_OTU#1090        | 0 | 0    | 0 | 0.02 | 0.005034 | 98.13 |
| Paludibacter_OTU#1084       | 0 | 0    | 0 | 0.02 | 0.005034 | 98.13 |
| Dorea_OTU#1079              | 0 | 0    | 0 | 0.02 | 0.005034 | 98.14 |
| Peptococcus_OTU#1068        | 0 | 0    | 0 | 0.02 | 0.005034 | 98.15 |
| Thermonema_OTU#1067         | 0 | 0    | 0 | 0.02 | 0.005034 | 98.15 |
| Paludibacter_OTU#1065       | 0 | 0    | 0 | 0.02 | 0.005034 | 98.16 |
| Paludibacter_OTU#1057       | 0 | 0    | 0 | 0.02 | 0.005034 | 98.16 |
| Dorea_OTU#1046              | 0 | 0    | 0 | 0.02 | 0.005034 | 98.17 |
| Rikenella_OTU#1045          | 0 | 0    | 0 | 0.02 | 0.005034 | 98.18 |
| Proteiniphilum_OTU#1039     | 0 | 0    | 0 | 0.02 | 0.005034 | 98.18 |
| Paludibacter_OTU#1037       | 0 | 0    | 0 | 0.02 | 0.005034 | 98.19 |
| Paludibacter_OTU#1035       | 0 | 0    | 0 | 0.02 | 0.005034 | 98.19 |
| Tannerella_OTU#1031         | 0 | 0    | 0 | 0.02 | 0.005034 | 98.2  |
| Paludibacter_OTU#1030       | 0 | 0    | 0 | 0.02 | 0.005034 | 98.21 |
| Barnesiella_OTU#1028        | 0 | 0    | 0 | 0.02 | 0.005034 | 98.21 |
| Tannerella_OTU#1027         | 0 | 0    | 0 | 0.02 | 0.005034 | 98.22 |
| Paludibacter_OTU#1024       | 0 | 0    | 0 | 0.02 | 0.005034 | 98.23 |
| Paludibacter_OTU#1023       | 0 | 0    | 0 | 0.02 | 0.005034 | 98.23 |
| Parasporobacterium_OTU#1021 | 0 | 0    | 0 | 0.02 | 0.005034 | 98.24 |
| Limibacter_OTU#1017         | 0 | 0    | 0 | 0.02 | 0.005034 | 98.24 |
| Dorea_OTU#1016              | 0 | 0    | 0 | 0.02 | 0.005034 | 98.25 |

|                         |   |      |   |      |          |       |
|-------------------------|---|------|---|------|----------|-------|
| Paludibacter_OTU#1015   | 0 | 0    | 0 | 0.02 | 0.005034 | 98.26 |
| Rikenella_OTU#1014      | 0 | 0    | 0 | 0.02 | 0.005034 | 98.26 |
| Papillibacter_OTU#1011  | 0 | 0    | 0 | 0.02 | 0.005034 | 98.27 |
| Paludibacter_OTU#1061   | 0 | 0    | 0 | 0.02 | 0.005034 | 98.27 |
| Pseudozobellia_OTU#1010 | 0 | 0    | 0 | 0.02 | 0.005034 | 98.28 |
| Barnesiella_OTU#1009    | 0 | 0    | 0 | 0.02 | 0.005034 | 98.29 |
| Howardella_OTU#1008     | 0 | 0    | 0 | 0.02 | 0.005034 | 98.29 |
| Paludibacter_OTU#1069   | 0 | 0    | 0 | 0.02 | 0.005034 | 98.3  |
| Barnesiella_OTU#1005    | 0 | 0    | 0 | 0.02 | 0.005034 | 98.3  |
| Tannerella_OTU#1001     | 0 | 0    | 0 | 0.02 | 0.005034 | 98.31 |
| Dorea_OTU#998           | 0 | 0    | 0 | 0.02 | 0.005034 | 98.32 |
| Paludibacter_OTU#39     | 0 | 0.02 | 0 | 0    | 0.005034 | 98.32 |
| Tannerella_OTU#38       | 0 | 0.02 | 0 | 0    | 0.005034 | 98.33 |
| Paludibacter_OTU#37     | 0 | 0.02 | 0 | 0    | 0.005034 | 98.33 |
| Paludibacter_OTU#35     | 0 | 0.02 | 0 | 0    | 0.005034 | 98.34 |
| Barnesiella_OTU#34      | 0 | 0.02 | 0 | 0    | 0.005034 | 98.35 |
| Rikenella_OTU#33        | 0 | 0.02 | 0 | 0    | 0.005034 | 98.35 |
| Paludibacter_OTU#32     | 0 | 0.02 | 0 | 0    | 0.005034 | 98.36 |
| Roseburia_OTU#31        | 0 | 0.02 | 0 | 0    | 0.005034 | 98.37 |
| Paludibacter_OTU#29     | 0 | 0.02 | 0 | 0    | 0.005034 | 98.37 |
| Paludibacter_OTU#28     | 0 | 0.02 | 0 | 0    | 0.005034 | 98.38 |
| Paludibacter_OTU#27     | 0 | 0.02 | 0 | 0    | 0.005034 | 98.38 |
| Limibacter_OTU#26       | 0 | 0.02 | 0 | 0    | 0.005034 | 98.39 |
| Paludibacter_OTU#25     | 0 | 0.02 | 0 | 0    | 0.005034 | 98.4  |
| Paludibacter_OTU#24     | 0 | 0.02 | 0 | 0    | 0.005034 | 98.4  |
| Paludibacter_OTU#23     | 0 | 0.02 | 0 | 0    | 0.005034 | 98.41 |
| Anaerophaga_OTU#22      | 0 | 0.02 | 0 | 0    | 0.005034 | 98.41 |
| Paludibacter_OTU#72     | 0 | 0.02 | 0 | 0    | 0.005034 | 98.42 |
| Paludibacter_OTU#71     | 0 | 0.02 | 0 | 0    | 0.005034 | 98.43 |
| Barnesiella_OTU#66      | 0 | 0.02 | 0 | 0    | 0.005034 | 98.43 |
| Paludibacter_OTU#60     | 0 | 0.02 | 0 | 0    | 0.005034 | 98.44 |
| Paludibacter_OTU#59     | 0 | 0.02 | 0 | 0    | 0.005034 | 98.44 |
| Paludibacter_OTU#58     | 0 | 0.02 | 0 | 0    | 0.005034 | 98.45 |
| Paraprevotella_OTU#57   | 0 | 0.02 | 0 | 0    | 0.005034 | 98.46 |
| Paludibacter_OTU#56     | 0 | 0.02 | 0 | 0    | 0.005034 | 98.46 |
| Bacteroides_OTU#55      | 0 | 0.02 | 0 | 0    | 0.005034 | 98.47 |
| Paludibacter_OTU#51     | 0 | 0.02 | 0 | 0    | 0.005034 | 98.47 |
| Paludibacter_OTU#50     | 0 | 0.02 | 0 | 0    | 0.005034 | 98.48 |
| Tannerella_OTU#49       | 0 | 0.02 | 0 | 0    | 0.005034 | 98.49 |
| Paludibacter_OTU#48     | 0 | 0.02 | 0 | 0    | 0.005034 | 98.49 |
| Paludibacter_OTU#46     | 0 | 0.02 | 0 | 0    | 0.005034 | 98.5  |

|                               |   |      |   |      |          |       |
|-------------------------------|---|------|---|------|----------|-------|
| Paludibacter_OTU#45           | 0 | 0.02 | 0 | 0    | 0.005034 | 98.51 |
| Paludibacter_OTU#44           | 0 | 0.02 | 0 | 0    | 0.005034 | 98.51 |
| Paludibacter_OTU#43           | 0 | 0.02 | 0 | 0    | 0.005034 | 98.52 |
| Paludibacter_OTU#42           | 0 | 0.02 | 0 | 0    | 0.005034 | 98.52 |
| Paludibacter_OTU#41           | 0 | 0.02 | 0 | 0    | 0.005034 | 98.53 |
| Paludibacter_OTU#1229         | 0 | 0.02 | 0 | 0    | 0.005034 | 98.54 |
| Pseudozobellia_OTU#1224       | 0 | 0.02 | 0 | 0    | 0.005034 | 98.54 |
| Escherichia/Shigella_OTU#1223 | 0 | 0.02 | 0 | 0    | 0.005034 | 98.55 |
| Paludibacter_OTU#1218         | 0 | 0.02 | 0 | 0    | 0.005034 | 98.55 |
| Paludibacter_OTU#1209         | 0 | 0.02 | 0 | 0    | 0.005034 | 98.56 |
| Parasutterella_OTU#1205       | 0 | 0.02 | 0 | 0    | 0.005034 | 98.57 |
| Parasutterella_OTU#1202       | 0 | 0.02 | 0 | 0    | 0.005034 | 98.57 |
| Paludibacter_OTU#1201         | 0 | 0.02 | 0 | 0    | 0.005034 | 98.58 |
| Parasutterella_OTU#1200       | 0 | 0.02 | 0 | 0    | 0.005034 | 98.58 |
| Bacteroides_OTU#1199          | 0 | 0.02 | 0 | 0    | 0.005034 | 98.59 |
| Paludibacter_OTU#1197         | 0 | 0.02 | 0 | 0    | 0.005034 | 98.6  |
| Parabacteroides_OTU#1195      | 0 | 0.02 | 0 | 0    | 0.005034 | 98.6  |
| Pseudozobellia_OTU#1194       | 0 | 0.02 | 0 | 0    | 0.005034 | 98.61 |
| Escherichia/Shigella_OTU#1192 | 0 | 0.02 | 0 | 0    | 0.005034 | 98.61 |
| Paludibacter_OTU#1191         | 0 | 0.02 | 0 | 0    | 0.005034 | 98.62 |
| Paludibacter_OTU#1187         | 0 | 0.02 | 0 | 0    | 0.005034 | 98.63 |
| Parabacteroides_OTU#1185      | 0 | 0.02 | 0 | 0    | 0.005034 | 98.63 |
| Tannerella_OTU#1184           | 0 | 0.02 | 0 | 0    | 0.005034 | 98.64 |
| Paludibacter_OTU#1183         | 0 | 0.02 | 0 | 0    | 0.005034 | 98.65 |
| Tannerella_OTU#1178           | 0 | 0.02 | 0 | 0    | 0.005034 | 98.65 |
| Paludibacter_OTU#1176         | 0 | 0.02 | 0 | 0    | 0.005034 | 98.66 |
| Lactobacillus_OTU#1175        | 0 | 0.02 | 0 | 0    | 0.005034 | 98.66 |
| Barnesiella_OTU#1174          | 0 | 0.02 | 0 | 0    | 0.005034 | 98.67 |
| Mucispirillum_OTU#1173        | 0 | 0.02 | 0 | 0    | 0.005034 | 98.68 |
| Parasutterella_OTU#1172       | 0 | 0.02 | 0 | 0    | 0.005034 | 98.68 |
| Ureaplasma_OTU#1171           | 0 | 0.02 | 0 | 0    | 0.005034 | 98.69 |
| Roseburia_OTU#1170            | 0 | 0.02 | 0 | 0    | 0.005034 | 98.69 |
| Alistipes_OTU#1169            | 0 | 0.02 | 0 | 0    | 0.005034 | 98.7  |
| Barnesiella_OTU#1168          | 0 | 0.02 | 0 | 0    | 0.005034 | 98.71 |
| Paludibacter_OTU#1167         | 0 | 0.02 | 0 | 0    | 0.005034 | 98.71 |
| Paludibacter_OTU#865          | 0 | 0    | 0 | 0.02 | 0.005034 | 98.72 |
| Paludibacter_OTU#864          | 0 | 0    | 0 | 0.02 | 0.005034 | 98.72 |
| Lactobacillus_OTU#863         | 0 | 0    | 0 | 0.02 | 0.005034 | 98.73 |
| Porphyromonadaceae_OTU#862    | 0 | 0    | 0 | 0.02 | 0.005034 | 98.74 |
| Parvimonas_OTU#861            | 0 | 0    | 0 | 0.02 | 0.005034 | 98.74 |
| Parvimonas_OTU#860            | 0 | 0    | 0 | 0.02 | 0.005034 | 98.75 |

|                        |        |   |   |      |          |       |
|------------------------|--------|---|---|------|----------|-------|
| Finegoldia_OTU#859     | 0      | 0 | 0 | 0.02 | 0.005034 | 98.75 |
| Hallella_OTU#858       | 0      | 0 | 0 | 0.02 | 0.005034 | 98.76 |
| Paludibacter_OTU#857   | 0      | 0 | 0 | 0.02 | 0.005034 | 98.77 |
| Limibacter_OTU#145     | 0.0167 | 0 | 0 | 0    | 0.004698 | 98.77 |
| Barnesiella_OTU#144    | 0.0167 | 0 | 0 | 0    | 0.004698 | 98.78 |
| Paludibacter_OTU#143   | 0.0167 | 0 | 0 | 0    | 0.004698 | 98.78 |
| Barnesiella_OTU#141    | 0.0167 | 0 | 0 | 0    | 0.004698 | 98.79 |
| Paludibacter_OTU#140   | 0.0167 | 0 | 0 | 0    | 0.004698 | 98.8  |
| Paludibacter_OTU#139   | 0.0167 | 0 | 0 | 0    | 0.004698 | 98.8  |
| Allobaculum_OTU#138    | 0.0167 | 0 | 0 | 0    | 0.004698 | 98.81 |
| Limibacter_OTU#137     | 0.0167 | 0 | 0 | 0    | 0.004698 | 98.81 |
| Paludibacter_OTU#133   | 0.0167 | 0 | 0 | 0    | 0.004698 | 98.82 |
| Barnesiella_OTU#132    | 0.0167 | 0 | 0 | 0    | 0.004698 | 98.82 |
| Paludibacter_OTU#131   | 0.0167 | 0 | 0 | 0    | 0.004698 | 98.83 |
| Paludibacter_OTU#130   | 0.0167 | 0 | 0 | 0    | 0.004698 | 98.84 |
| Paludibacter_OTU#129   | 0.0167 | 0 | 0 | 0    | 0.004698 | 98.84 |
| Paludibacter_OTU#128   | 0.0167 | 0 | 0 | 0    | 0.004698 | 98.85 |
| Limibacter_OTU#127     | 0.0167 | 0 | 0 | 0    | 0.004698 | 98.85 |
| Barnesiella_OTU#125    | 0.0167 | 0 | 0 | 0    | 0.004698 | 98.86 |
| Anaerophaga_OTU#124    | 0.0167 | 0 | 0 | 0    | 0.004698 | 98.86 |
| Paludibacter_OTU#123   | 0.0167 | 0 | 0 | 0    | 0.004698 | 98.87 |
| Barnesiella_OTU#122    | 0.0167 | 0 | 0 | 0    | 0.004698 | 98.87 |
| Barnesiella_OTU#120    | 0.0167 | 0 | 0 | 0    | 0.004698 | 98.88 |
| Paludibacter_OTU#119   | 0.0167 | 0 | 0 | 0    | 0.004698 | 98.89 |
| Rikenella_OTU#118      | 0.0167 | 0 | 0 | 0    | 0.004698 | 98.89 |
| Paludibacter_OTU#117   | 0.0167 | 0 | 0 | 0    | 0.004698 | 98.9  |
| Anaerophaga_OTU#116    | 0.0167 | 0 | 0 | 0    | 0.004698 | 98.9  |
| Alistipes_OTU#115      | 0.0167 | 0 | 0 | 0    | 0.004698 | 98.91 |
| Allobaculum_OTU#114    | 0.0167 | 0 | 0 | 0    | 0.004698 | 98.91 |
| Paludibacter_OTU#113   | 0.0167 | 0 | 0 | 0    | 0.004698 | 98.92 |
| Parasutterella_OTU#111 | 0.0167 | 0 | 0 | 0    | 0.004698 | 98.93 |
| Rikenella_OTU#110      | 0.0167 | 0 | 0 | 0    | 0.004698 | 98.93 |
| Paludibacter_OTU#109   | 0.0167 | 0 | 0 | 0    | 0.004698 | 98.94 |
| Anaerophaga_OTU#107    | 0.0167 | 0 | 0 | 0    | 0.004698 | 98.94 |
| Limibacter_OTU#104     | 0.0167 | 0 | 0 | 0    | 0.004698 | 98.95 |
| Paludibacter_OTU#103   | 0.0167 | 0 | 0 | 0    | 0.004698 | 98.95 |
| Allobaculum_OTU#102    | 0.0167 | 0 | 0 | 0    | 0.004698 | 98.96 |
| Lawsonia_OTU#101       | 0.0167 | 0 | 0 | 0    | 0.004698 | 98.97 |
| Paludibacter_OTU#100   | 0.0167 | 0 | 0 | 0    | 0.004698 | 98.97 |
| Anaerophaga_OTU#99     | 0.0167 | 0 | 0 | 0    | 0.004698 | 98.98 |
| Allobaculum_OTU#98     | 0.0167 | 0 | 0 | 0    | 0.004698 | 98.98 |



|                        |        |   |   |   |          |       |
|------------------------|--------|---|---|---|----------|-------|
| Paludibacter_OTU#97    | 0.0167 | 0 | 0 | 0 | 0.004698 | 98.99 |
| Paludibacter_OTU#96    | 0.0167 | 0 | 0 | 0 | 0.004698 | 98.99 |
| Anaerophaga_OTU#93     | 0.0167 | 0 | 0 | 0 | 0.004698 | 99    |
| Barnesiella_OTU#92     | 0.0167 | 0 | 0 | 0 | 0.004698 | 99.01 |
| Paludibacter_OTU#91    | 0.0167 | 0 | 0 | 0 | 0.004698 | 99.01 |
| Paludibacter_OTU#90    | 0.0167 | 0 | 0 | 0 | 0.004698 | 99.02 |
| Anaerophaga_OTU#89     | 0.0167 | 0 | 0 | 0 | 0.004698 | 99.02 |
| Paludibacter_OTU#88    | 0.0167 | 0 | 0 | 0 | 0.004698 | 99.03 |
| Paludibacter_OTU#87    | 0.0167 | 0 | 0 | 0 | 0.004698 | 99.03 |
| Paludibacter_OTU#86    | 0.0167 | 0 | 0 | 0 | 0.004698 | 99.04 |
| Paludibacter_OTU#85    | 0.0167 | 0 | 0 | 0 | 0.004698 | 99.05 |
| Tannerella_OTU#84      | 0.0167 | 0 | 0 | 0 | 0.004698 | 99.05 |
| Paludibacter_OTU#82    | 0.0167 | 0 | 0 | 0 | 0.004698 | 99.06 |
| Paludibacter_OTU#81    | 0.0167 | 0 | 0 | 0 | 0.004698 | 99.06 |
| Paludibacter_OTU#80    | 0.0167 | 0 | 0 | 0 | 0.004698 | 99.07 |
| Limibacter_OTU#79      | 0.0167 | 0 | 0 | 0 | 0.004698 | 99.07 |
| Anaerophaga_OTU#78     | 0.0167 | 0 | 0 | 0 | 0.004698 | 99.08 |
| Flagellimonas_OTU#77   | 0.0167 | 0 | 0 | 0 | 0.004698 | 99.09 |
| Anaerophaga_OTU#76     | 0.0167 | 0 | 0 | 0 | 0.004698 | 99.09 |
| Kordia_OTU#75          | 0.0167 | 0 | 0 | 0 | 0.004698 | 99.1  |
| Limibacter_OTU#74      | 0.0167 | 0 | 0 | 0 | 0.004698 | 99.1  |
| Limibacter_OTU#73      | 0.0167 | 0 | 0 | 0 | 0.004698 | 99.11 |
| Barnesiella_OTU#234    | 0.0167 | 0 | 0 | 0 | 0.004698 | 99.11 |
| Paludibacter_OTU#233   | 0.0167 | 0 | 0 | 0 | 0.004698 | 99.12 |
| Limibacter_OTU#232     | 0.0167 | 0 | 0 | 0 | 0.004698 | 99.12 |
| Limibacter_OTU#231     | 0.0167 | 0 | 0 | 0 | 0.004698 | 99.13 |
| Limibacter_OTU#229     | 0.0167 | 0 | 0 | 0 | 0.004698 | 99.14 |
| Tannerella_OTU#227     | 0.0167 | 0 | 0 | 0 | 0.004698 | 99.14 |
| Barnesiella_OTU#226    | 0.0167 | 0 | 0 | 0 | 0.004698 | 99.15 |
| Parasutterella_OTU#225 | 0.0167 | 0 | 0 | 0 | 0.004698 | 99.15 |
| Paludibacter_OTU#224   | 0.0167 | 0 | 0 | 0 | 0.004698 | 99.16 |
| Paludibacter_OTU#223   | 0.0167 | 0 | 0 | 0 | 0.004698 | 99.16 |
| Rikenella_OTU#222      | 0.0167 | 0 | 0 | 0 | 0.004698 | 99.17 |
| Rikenella_OTU#220      | 0.0167 | 0 | 0 | 0 | 0.004698 | 99.18 |
| Limibacter_OTU#218     | 0.0167 | 0 | 0 | 0 | 0.004698 | 99.18 |
| Allobaculum_OTU#217    | 0.0167 | 0 | 0 | 0 | 0.004698 | 99.19 |
| Aquiflexum_OTU#214     | 0.0167 | 0 | 0 | 0 | 0.004698 | 99.19 |
| Paludibacter_OTU#212   | 0.0167 | 0 | 0 | 0 | 0.004698 | 99.2  |
| Limibacter_OTU#210     | 0.0167 | 0 | 0 | 0 | 0.004698 | 99.2  |
| Barnesiella_OTU#209    | 0.0167 | 0 | 0 | 0 | 0.004698 | 99.21 |
| Limibacter_OTU#207     | 0.0167 | 0 | 0 | 0 | 0.004698 | 99.22 |

|                          |        |   |   |   |          |       |
|--------------------------|--------|---|---|---|----------|-------|
| Allobaculum_OTU#206      | 0.0167 | 0 | 0 | 0 | 0.004698 | 99.22 |
| Limibacter_OTU#205       | 0.0167 | 0 | 0 | 0 | 0.004698 | 99.23 |
| Barnesiella_OTU#204      | 0.0167 | 0 | 0 | 0 | 0.004698 | 99.23 |
| Limibacter_OTU#203       | 0.0167 | 0 | 0 | 0 | 0.004698 | 99.24 |
| Rikenella_OTU#202        | 0.0167 | 0 | 0 | 0 | 0.004698 | 99.24 |
| Allobaculum_OTU#201      | 0.0167 | 0 | 0 | 0 | 0.004698 | 99.25 |
| Paludibacter_OTU#200     | 0.0167 | 0 | 0 | 0 | 0.004698 | 99.26 |
| Paludibacter_OTU#198     | 0.0167 | 0 | 0 | 0 | 0.004698 | 99.26 |
| Barnesiella_OTU#197      | 0.0167 | 0 | 0 | 0 | 0.004698 | 99.27 |
| Paludibacter_OTU#196     | 0.0167 | 0 | 0 | 0 | 0.004698 | 99.27 |
| Anaerophaga_OTU#195      | 0.0167 | 0 | 0 | 0 | 0.004698 | 99.28 |
| Barnesiella_OTU#193      | 0.0167 | 0 | 0 | 0 | 0.004698 | 99.28 |
| Paludibacter_OTU#192     | 0.0167 | 0 | 0 | 0 | 0.004698 | 99.29 |
| Allobaculum_OTU#190      | 0.0167 | 0 | 0 | 0 | 0.004698 | 99.3  |
| Paludibacter_OTU#189     | 0.0167 | 0 | 0 | 0 | 0.004698 | 99.3  |
| Unclassified_TM7_OTU#188 | 0.0167 | 0 | 0 | 0 | 0.004698 | 99.31 |
| Belliella_OTU#186        | 0.0167 | 0 | 0 | 0 | 0.004698 | 99.31 |
| Paludibacter_OTU#184     | 0.0167 | 0 | 0 | 0 | 0.004698 | 99.32 |
| Paludibacter_OTU#183     | 0.0167 | 0 | 0 | 0 | 0.004698 | 99.32 |
| Paludibacter_OTU#182     | 0.0167 | 0 | 0 | 0 | 0.004698 | 99.33 |
| Barnesiella_OTU#181      | 0.0167 | 0 | 0 | 0 | 0.004698 | 99.34 |
| Paludibacter_OTU#180     | 0.0167 | 0 | 0 | 0 | 0.004698 | 99.34 |
| Barnesiella_OTU#179      | 0.0167 | 0 | 0 | 0 | 0.004698 | 99.35 |
| Paludibacter_OTU#295     | 0.0167 | 0 | 0 | 0 | 0.004698 | 99.35 |
| Limibacter_OTU#292       | 0.0167 | 0 | 0 | 0 | 0.004698 | 99.36 |
| Paludibacter_OTU#287     | 0.0167 | 0 | 0 | 0 | 0.004698 | 99.36 |
| Limibacter_OTU#286       | 0.0167 | 0 | 0 | 0 | 0.004698 | 99.37 |
| Rikenella_OTU#285        | 0.0167 | 0 | 0 | 0 | 0.004698 | 99.37 |
| Barnesiella_OTU#282      | 0.0167 | 0 | 0 | 0 | 0.004698 | 99.38 |
| Xylanibacter_OTU#278     | 0.0167 | 0 | 0 | 0 | 0.004698 | 99.39 |
| Tannerella_OTU#277       | 0.0167 | 0 | 0 | 0 | 0.004698 | 99.39 |
| Rikenella_OTU#272        | 0.0167 | 0 | 0 | 0 | 0.004698 | 99.4  |
| Barnesiella_OTU#271      | 0.0167 | 0 | 0 | 0 | 0.004698 | 99.4  |
| Allobaculum_OTU#270      | 0.0167 | 0 | 0 | 0 | 0.004698 | 99.41 |
| Paludibacter_OTU#269     | 0.0167 | 0 | 0 | 0 | 0.004698 | 99.41 |
| Hallella_OTU#267         | 0.0167 | 0 | 0 | 0 | 0.004698 | 99.42 |
| Ureaplasma_OTU#266       | 0.0167 | 0 | 0 | 0 | 0.004698 | 99.43 |
| Barnesiella_OTU#265      | 0.0167 | 0 | 0 | 0 | 0.004698 | 99.43 |
| Barnesiella_OTU#263      | 0.0167 | 0 | 0 | 0 | 0.004698 | 99.44 |
| Barnesiella_OTU#262      | 0.0167 | 0 | 0 | 0 | 0.004698 | 99.44 |
| Paludibacter_OTU#261     | 0.0167 | 0 | 0 | 0 | 0.004698 | 99.45 |

|                        |        |   |   |   |          |       |
|------------------------|--------|---|---|---|----------|-------|
| Paludibacter_OTU#260   | 0.0167 | 0 | 0 | 0 | 0.004698 | 99.45 |
| Rikenella_OTU#259      | 0.0167 | 0 | 0 | 0 | 0.004698 | 99.46 |
| Tannerella_OTU#258     | 0.0167 | 0 | 0 | 0 | 0.004698 | 99.47 |
| Allobaculum_OTU#256    | 0.0167 | 0 | 0 | 0 | 0.004698 | 99.47 |
| Anaerophaga_OTU#255    | 0.0167 | 0 | 0 | 0 | 0.004698 | 99.48 |
| Paludibacter_OTU#254   | 0.0167 | 0 | 0 | 0 | 0.004698 | 99.48 |
| Barnesiella_OTU#253    | 0.0167 | 0 | 0 | 0 | 0.004698 | 99.49 |
| Paludibacter_OTU#251   | 0.0167 | 0 | 0 | 0 | 0.004698 | 99.49 |
| Paludibacter_OTU#250   | 0.0167 | 0 | 0 | 0 | 0.004698 | 99.5  |
| Limibacter_OTU#249     | 0.0167 | 0 | 0 | 0 | 0.004698 | 99.51 |
| Barnesiella_OTU#248    | 0.0167 | 0 | 0 | 0 | 0.004698 | 99.51 |
| Hallella_OTU#247       | 0.0167 | 0 | 0 | 0 | 0.004698 | 99.52 |
| Paludibacter_OTU#245   | 0.0167 | 0 | 0 | 0 | 0.004698 | 99.52 |
| Parasutterella_OTU#242 | 0.0167 | 0 | 0 | 0 | 0.004698 | 99.53 |
| Tannerella_OTU#241     | 0.0167 | 0 | 0 | 0 | 0.004698 | 99.53 |
| Paludibacter_OTU#239   | 0.0167 | 0 | 0 | 0 | 0.004698 | 99.54 |
| Staphylococcus_OTU#238 | 0.0167 | 0 | 0 | 0 | 0.004698 | 99.55 |
| Barnesiella_OTU#237    | 0.0167 | 0 | 0 | 0 | 0.004698 | 99.55 |
| Limibacter_OTU#235     | 0.0167 | 0 | 0 | 0 | 0.004698 | 99.56 |
| Limibacter_OTU#21      | 0.0167 | 0 | 0 | 0 | 0.004698 | 99.56 |
| Paludibacter_OTU#20    | 0.0167 | 0 | 0 | 0 | 0.004698 | 99.57 |
| Paludibacter_OTU#19    | 0.0167 | 0 | 0 | 0 | 0.004698 | 99.57 |
| Limibacter_OTU#178     | 0.0167 | 0 | 0 | 0 | 0.004698 | 99.58 |
| Paludibacter_OTU#177   | 0.0167 | 0 | 0 | 0 | 0.004698 | 99.59 |
| Allobaculum_OTU#176    | 0.0167 | 0 | 0 | 0 | 0.004698 | 99.59 |
| Barnesiella_OTU#18     | 0.0167 | 0 | 0 | 0 | 0.004698 | 99.6  |
| Paraprevotella_OTU#175 | 0.0167 | 0 | 0 | 0 | 0.004698 | 99.6  |
| Anaerophaga_OTU#174    | 0.0167 | 0 | 0 | 0 | 0.004698 | 99.61 |
| Allobaculum_OTU#173    | 0.0167 | 0 | 0 | 0 | 0.004698 | 99.61 |
| Allobaculum_OTU#17     | 0.0167 | 0 | 0 | 0 | 0.004698 | 99.62 |
| Parasutterella_OTU#170 | 0.0167 | 0 | 0 | 0 | 0.004698 | 99.62 |
| Limibacter_OTU#169     | 0.0167 | 0 | 0 | 0 | 0.004698 | 99.63 |
| Allobaculum_OTU#167    | 0.0167 | 0 | 0 | 0 | 0.004698 | 99.64 |
| Rikenella_OTU#16       | 0.0167 | 0 | 0 | 0 | 0.004698 | 99.64 |
| Allobaculum_OTU#166    | 0.0167 | 0 | 0 | 0 | 0.004698 | 99.65 |
| Limibacter_OTU#165     | 0.0167 | 0 | 0 | 0 | 0.004698 | 99.65 |
| Paludibacter_OTU#164   | 0.0167 | 0 | 0 | 0 | 0.004698 | 99.66 |
| Limibacter_OTU#163     | 0.0167 | 0 | 0 | 0 | 0.004698 | 99.66 |
| Allobaculum_OTU#15     | 0.0167 | 0 | 0 | 0 | 0.004698 | 99.67 |
| Allobaculum_OTU#161    | 0.0167 | 0 | 0 | 0 | 0.004698 | 99.68 |
| Paludibacter_OTU#160   | 0.0167 | 0 | 0 | 0 | 0.004698 | 99.68 |

|                         |        |   |   |   |          |       |
|-------------------------|--------|---|---|---|----------|-------|
| Anaerophaga_OTU#159     | 0.0167 | 0 | 0 | 0 | 0.004698 | 99.69 |
| Barnesiella_OTU#14      | 0.0167 | 0 | 0 | 0 | 0.004698 | 99.69 |
| Rikenella_OTU#157       | 0.0167 | 0 | 0 | 0 | 0.004698 | 99.7  |
| Limibacter_OTU#156      | 0.0167 | 0 | 0 | 0 | 0.004698 | 99.7  |
| Paludibacter_OTU#155    | 0.0167 | 0 | 0 | 0 | 0.004698 | 99.71 |
| Limibacter_OTU#13       | 0.0167 | 0 | 0 | 0 | 0.004698 | 99.72 |
| Parasutterella_OTU#153  | 0.0167 | 0 | 0 | 0 | 0.004698 | 99.72 |
| Limibacter_OTU#151      | 0.0167 | 0 | 0 | 0 | 0.004698 | 99.73 |
| Paludibacter_OTU#150    | 0.0167 | 0 | 0 | 0 | 0.004698 | 99.73 |
| Dorea_OTU#12            | 0.0167 | 0 | 0 | 0 | 0.004698 | 99.74 |
| Rikenella_OTU#149       | 0.0167 | 0 | 0 | 0 | 0.004698 | 99.74 |
| Limibacter_OTU#148      | 0.0167 | 0 | 0 | 0 | 0.004698 | 99.75 |
| Paludibacter_OTU#11     | 0.0167 | 0 | 0 | 0 | 0.004698 | 99.76 |
| Costertonia_OTU#10      | 0.0167 | 0 | 0 | 0 | 0.004698 | 99.76 |
| Barnesiella_OTU#8       | 0.0167 | 0 | 0 | 0 | 0.004698 | 99.77 |
| Paludibacter_OTU#6      | 0.0167 | 0 | 0 | 0 | 0.004698 | 99.77 |
| Allobaculum_OTU#5       | 0.0167 | 0 | 0 | 0 | 0.004698 | 99.78 |
| Paludibacter_OTU#4      | 0.0167 | 0 | 0 | 0 | 0.004698 | 99.78 |
| Rikenella_OTU#3         | 0.0167 | 0 | 0 | 0 | 0.004698 | 99.79 |
| Barnesiella_OTU#2       | 0.0167 | 0 | 0 | 0 | 0.004698 | 99.8  |
| Paludibacter_OTU#1      | 0.0167 | 0 | 0 | 0 | 0.004698 | 99.8  |
| Parasutterella_OTU#1162 | 0.0167 | 0 | 0 | 0 | 0.004698 | 99.81 |
| Limibacter_OTU#1160     | 0.0167 | 0 | 0 | 0 | 0.004698 | 99.81 |
| Rikenella_OTU#1157      | 0.0167 | 0 | 0 | 0 | 0.004698 | 99.82 |
| Paludibacter_OTU#1153   | 0.0167 | 0 | 0 | 0 | 0.004698 | 99.82 |
| Allobaculum_OTU#1149    | 0.0167 | 0 | 0 | 0 | 0.004698 | 99.83 |
| Proteiniphilum_OTU#1145 | 0.0167 | 0 | 0 | 0 | 0.004698 | 99.84 |
| Paludibacter_OTU#1143   | 0.0167 | 0 | 0 | 0 | 0.004698 | 99.84 |
| Limibacter_OTU#1138     | 0.0167 | 0 | 0 | 0 | 0.004698 | 99.85 |
| Anaerophaga_OTU#1137    | 0.0167 | 0 | 0 | 0 | 0.004698 | 99.85 |
| Limibacter_OTU#1135     | 0.0167 | 0 | 0 | 0 | 0.004698 | 99.86 |
| Lactobacillus_OTU#1131  | 0.0167 | 0 | 0 | 0 | 0.004698 | 99.86 |
| Paludibacter_OTU#1129   | 0.0167 | 0 | 0 | 0 | 0.004698 | 99.87 |
| Allobaculum_OTU#1128    | 0.0167 | 0 | 0 | 0 | 0.004698 | 99.87 |
| Limibacter_OTU#1127     | 0.0167 | 0 | 0 | 0 | 0.004698 | 99.88 |
| Limibacter_OTU#1125     | 0.0167 | 0 | 0 | 0 | 0.004698 | 99.89 |
| Limibacter_OTU#1124     | 0.0167 | 0 | 0 | 0 | 0.004698 | 99.89 |
| Limibacter_OTU#1123     | 0.0167 | 0 | 0 | 0 | 0.004698 | 99.9  |
| Allobaculum_OTU#1122    | 0.0167 | 0 | 0 | 0 | 0.004698 | 99.9  |
| Blautia_OTU#1121        | 0.0167 | 0 | 0 | 0 | 0.004698 | 99.91 |
| Rikenella_OTU#1120      | 0.0167 | 0 | 0 | 0 | 0.004698 | 99.91 |

|                        |        |   |   |   |          |       |
|------------------------|--------|---|---|---|----------|-------|
| Allobaculum_OTU#1117   | 0.0167 | 0 | 0 | 0 | 0.004698 | 99.92 |
| Lactobacillus_OTU#1116 | 0.0167 | 0 | 0 | 0 | 0.004698 | 99.93 |
| Limibacter_OTU#1115    | 0.0167 | 0 | 0 | 0 | 0.004698 | 99.93 |
| Allobaculum_OTU#1114   | 0.0167 | 0 | 0 | 0 | 0.004698 | 99.94 |
| Lawsonia_OTU#1112      | 0.0167 | 0 | 0 | 0 | 0.004698 | 99.94 |
| Paludibacter_OTU#1111  | 0.0167 | 0 | 0 | 0 | 0.004698 | 99.95 |
| Limibacter_OTU#1110    | 0.0167 | 0 | 0 | 0 | 0.004698 | 99.95 |
| Tannerella_OTU#1109    | 0.0167 | 0 | 0 | 0 | 0.004698 | 99.96 |
| Paludibacter_OTU#1108  | 0.0167 | 0 | 0 | 0 | 0.004698 | 99.97 |
| Paludibacter_OTU#1106  | 0.0167 | 0 | 0 | 0 | 0.004698 | 99.97 |
| Paludibacter_OTU#1104  | 0.0167 | 0 | 0 | 0 | 0.004698 | 99.98 |
| Anaerophaga_OTU#1101   | 0.0167 | 0 | 0 | 0 | 0.004698 | 99.98 |
| Anaerophaga_OTU#1100   | 0.0167 | 0 | 0 | 0 | 0.004698 | 99.99 |
| Allobaculum_OTU#1099   | 0.0167 | 0 | 0 | 0 | 0.004698 | 99.99 |
| Limibacter_OTU#1097    | 0.0167 | 0 | 0 | 0 | 0.004698 | 100   |

Supplementary Table 3. OTUs in *Ace2*<sup>+y</sup> and *Ace2*<sup>-y</sup> mice with or without rapamycin (RAPA) treatment.

Data are shown as the number of occurrences for each OTU detected by 454 sequencing.

| OTUs                                  | <i>Ace2</i> <sup>-y</sup> #1 | <i>Ace2</i> <sup>-y</sup> #2 | <i>Ace2</i> <sup>-y</sup> #3 | <i>Ace2</i> <sup>-y</sup> #4 | <i>Ace2</i> <sup>+y</sup> #1 | <i>Ace2</i> <sup>+y</sup> #2 | <i>Ace2</i> <sup>+y</sup> #3 | <i>Ace2</i> <sup>+y</sup> #4 | <i>Ace2</i> <sup>+y</sup> #5 | <i>Ace2</i> <sup>+y</sup> + RAPA # 1 | <i>Ace2</i> <sup>+y</sup> + RAPA # 2 | <i>Ace2</i> <sup>+y</sup> + RAPA # 3 | <i>Ace2</i> <sup>+y</sup> + RAPA # 4 | <i>Ace2</i> <sup>+y</sup> + RAPA # 5 |
|---------------------------------------|------------------------------|------------------------------|------------------------------|------------------------------|------------------------------|------------------------------|------------------------------|------------------------------|------------------------------|--------------------------------------|--------------------------------------|--------------------------------------|--------------------------------------|--------------------------------------|
| Limibacter_OTU#1                      | 217                          | 267                          | 283                          | 288                          | 127                          | 117                          | 178                          | 169                          | 196                          | 118                                  | 134                                  | 106                                  | 106                                  | 126                                  |
| unclassified Porphyromonadaceae_OTU#2 | 43                           | 18                           | 57                           | 22                           | 3                            | 3                            | 5                            | 2                            | 22                           | 10                                   | 6                                    | 9                                    | 5                                    | 5                                    |
| Allobaculum_OTU#3                     | 27                           | 35                           | 14                           | 29                           | 7                            | 2                            | 3                            | 6                            | 32                           | 0                                    | 2                                    | 3                                    | 4                                    | 3                                    |
| unclassified Porphyromonadaceae_OTU#4 | 6                            | 3                            | 1                            | 5                            | 0                            | 0                            | 0                            | 1                            | 0                            | 0                                    | 0                                    | 0                                    | 0                                    | 0                                    |
| Paludibacter_OTU#5                    | 28                           | 10                           | 19                           | 18                           | 1                            | 1                            | 0                            | 1                            | 17                           | 1                                    | 8                                    | 3                                    | 1                                    | 1                                    |
| Paraprevotella_OTU#6                  | 5                            | 2                            | 4                            | 0                            | 0                            | 0                            | 0                            | 0                            | 0                            | 0                                    | 0                                    | 0                                    | 0                                    | 0                                    |
| Paludibacter_OTU#7                    | 2                            | 2                            | 0                            | 0                            | 0                            | 1                            | 0                            | 0                            | 2                            | 0                                    | 1                                    | 1                                    | 2                                    | 4                                    |
| Anaerophaga_OTU#8                     | 32                           | 14                           | 16                           | 25                           | 8                            | 4                            | 2                            | 3                            | 3                            | 11                                   | 12                                   | 8                                    | 20                                   | 10                                   |
| Paludibacter_OTU#9                    | 102                          | 43                           | 76                           | 81                           | 28                           | 24                           | 17                           | 14                           | 17                           | 30                                   | 24                                   | 29                                   | 26                                   | 13                                   |
| Paludibacter_OTU#10                   | 1                            | 0                            | 1                            | 0                            | 0                            | 0                            | 0                            | 0                            | 0                            | 0                                    | 0                                    | 0                                    | 0                                    | 0                                    |
| Rikenella_OTU#11                      | 21                           | 8                            | 15                           | 22                           | 3                            | 5                            | 5                            | 4                            | 4                            | 6                                    | 5                                    | 2                                    | 4                                    | 2                                    |
| Paludibacter_OTU#12                   | 6                            | 3                            | 4                            | 4                            | 1                            | 4                            | 3                            | 0                            | 20                           | 5                                    | 7                                    | 5                                    | 1                                    | 4                                    |
| Allobaculum_OTU#13                    | 8                            | 17                           | 11                           | 11                           | 1                            | 2                            | 0                            | 0                            | 7                            | 0                                    | 1                                    | 0                                    | 0                                    | 1                                    |
| Coprococcus_OTU#14                    | 2                            | 1                            | 0                            | 0                            | 0                            | 0                            | 0                            | 0                            | 0                            | 0                                    | 0                                    | 0                                    | 0                                    | 0                                    |
| Barnesiella_OTU#15                    | 6                            | 4                            | 0                            | 4                            | 0                            | 2                            | 2                            | 3                            | 1                            | 2                                    | 2                                    | 5                                    | 0                                    | 2                                    |
| Allobaculum_OTU#16                    | 20                           | 37                           | 40                           | 18                           | 0                            | 0                            | 0                            | 0                            | 0                            | 0                                    | 0                                    | 0                                    | 0                                    | 0                                    |
| Allobaculum_OTU#17                    | 16                           | 24                           | 19                           | 19                           | 0                            | 0                            | 0                            | 0                            | 0                            | 0                                    | 0                                    | 0                                    | 0                                    | 0                                    |
| Rikenella_OTU#18                      | 20                           | 9                            | 11                           | 29                           | 1                            | 8                            | 16                           | 9                            | 5                            | 12                                   | 9                                    | 10                                   | 10                                   | 12                                   |
| Anaerophaga_OTU#19                    | 13                           | 12                           | 4                            | 2                            | 7                            | 1                            | 4                            | 3                            | 1                            | 4                                    | 2                                    | 0                                    | 6                                    | 2                                    |
| Barnesiella_OTU#20                    | 1                            | 0                            | 0                            | 0                            | 0                            | 0                            | 0                            | 0                            | 0                            | 0                                    | 0                                    | 0                                    | 0                                    | 0                                    |

|                                   |    |    |    |    |     |     |     |    |    |     |     |     |    |     |
|-----------------------------------|----|----|----|----|-----|-----|-----|----|----|-----|-----|-----|----|-----|
| Tannerella_OTU#21                 | 14 | 9  | 13 | 5  | 121 | 160 | 85  | 82 | 49 | 106 | 116 | 157 | 99 | 44  |
| Rikenella_OTU#22                  | 17 | 13 | 33 | 17 | 7   | 17  | 14  | 6  | 4  | 5   | 13  | 9   | 9  | 8   |
| Parasutterella_OTU#23             | 49 | 19 | 42 | 54 | 0   | 0   | 0   | 0  | 0  | 0   | 0   | 0   | 0  | 0   |
| Paludibacter_OTU#24               | 2  | 0  | 0  | 3  | 1   | 1   | 0   | 0  | 0  | 1   | 1   | 1   | 1  | 0   |
| Limibacter_OTU#25                 | 1  | 0  | 0  | 0  | 0   | 0   | 0   | 0  | 0  | 0   | 0   | 0   | 0  | 0   |
| Barnesiella_OTU#26                | 18 | 10 | 16 | 7  | 0   | 0   | 0   | 0  | 0  | 0   | 0   | 0   | 0  | 0   |
| Paludibacter_OTU#27               | 1  | 0  | 0  | 0  | 0   | 0   | 0   | 0  | 0  | 0   | 0   | 0   | 1  | 0   |
| Paludibacter_OTU#28               | 1  | 0  | 1  | 2  | 0   | 0   | 0   | 0  | 0  | 0   | 0   | 0   | 0  | 0   |
| Ralstonia_OTU#29                  | 1  | 0  | 0  | 1  | 0   | 0   | 1   | 0  | 0  | 1   | 0   | 0   | 0  | 0   |
| Lactobacillus_OTU#30              | 10 | 3  | 4  | 9  | 3   | 1   | 0   | 1  | 18 | 6   | 45  | 45  | 21 | 32  |
| Barnesiella_OTU#31                | 1  | 0  | 0  | 0  | 0   | 0   | 0   | 0  | 0  | 0   | 0   | 0   | 0  | 0   |
| Anaerophaga_OTU#32                | 8  | 0  | 0  | 1  | 1   | 2   | 0   | 0  | 0  | 5   | 2   | 3   | 0  | 0   |
| Paludibacter_OTU#33               | 5  | 2  | 5  | 1  | 1   | 0   | 0   | 1  | 4  | 2   | 0   | 1   | 0  | 0   |
| Dichelobacter_OTU#34              | 3  | 1  | 0  | 2  | 0   | 0   | 0   | 0  | 0  | 0   | 0   | 0   | 0  | 0   |
| Paludibacter_OTU#35               | 23 | 1  | 8  | 8  | 122 | 111 | 107 | 98 | 38 | 94  | 93  | 61  | 69 | 101 |
| Barnesiella_OTU#36                | 1  | 0  | 0  | 0  | 0   | 0   | 1   | 0  | 0  | 0   | 0   | 0   | 0  | 0   |
| Barnesiella_OTU#37                | 16 | 17 | 8  | 13 | 53  | 88  | 58  | 63 | 10 | 50  | 36  | 33  | 13 | 48  |
| Lachnobacterium_OTU#38            | 9  | 43 | 6  | 6  | 0   | 0   | 0   | 0  | 1  | 1   | 0   | 0   | 0  | 0   |
| Coproccoccus_OTU#39               | 2  | 5  | 2  | 0  | 0   | 0   | 3   | 0  | 11 | 0   | 0   | 0   | 0  | 0   |
| Paludibacter_OTU#40               | 35 | 16 | 8  | 13 | 18  | 34  | 23  | 28 | 6  | 61  | 36  | 38  | 20 | 71  |
| unclassified Bacteroidales_OTU#41 | 1  | 1  | 1  | 2  | 0   | 0   | 0   | 1  | 0  | 2   | 0   | 3   | 1  | 2   |
| Paludibacter_OTU#42               | 2  | 0  | 1  | 1  | 0   | 1   | 0   | 0  | 0  | 0   | 0   | 0   | 0  | 0   |
| Paludibacter_OTU#43               | 6  | 2  | 5  | 8  | 3   | 4   | 3   | 2  | 1  | 6   | 6   | 5   | 4  | 4   |
| Paludibacter_OTU#44               | 1  | 0  | 0  | 0  | 0   | 0   | 0   | 0  | 0  | 0   | 0   | 0   | 0  | 0   |
| Paludibacter_OTU#45               | 2  | 0  | 1  | 1  | 1   | 3   | 0   | 0  | 0  | 2   | 0   | 0   | 0  | 0   |
| Barnesiella_OTU#46                | 6  | 5  | 8  | 6  | 0   | 1   | 2   | 2  | 2  | 4   | 1   | 4   | 2  | 2   |
| Anaerophaga_OTU#47                | 1  | 0  | 0  | 0  | 0   | 0   | 0   | 0  | 0  | 0   | 0   | 1   | 0  | 0   |
| Limibacter_OTU#48                 | 1  | 3  | 0  | 2  | 1   | 2   | 1   | 0  | 0  | 2   | 0   | 2   | 1  | 3   |
| Limibacter_OTU#49                 | 1  | 0  | 1  | 0  | 0   | 0   | 0   | 1  | 2  | 0   | 0   | 0   | 0  | 1   |
| Lactobacillus_OTU#50              | 13 | 17 | 19 | 50 | 14  | 3   | 31  | 36 | 0  | 10  | 82  | 53  | 4  | 170 |

Supplementary Table 3

|                                        |    |    |    |    |    |    |    |    |    |    |    |    |    |   |
|----------------------------------------|----|----|----|----|----|----|----|----|----|----|----|----|----|---|
| Tannerella_OTU#51                      | 1  | 0  | 0  | 0  | 0  | 0  | 0  | 0  | 0  | 0  | 0  | 0  | 0  | 0 |
| Lachnobacterium_OTU#52                 | 3  | 5  | 1  | 0  | 0  | 0  | 3  | 0  | 0  | 0  | 0  | 0  | 0  | 0 |
| Flexithrix_OTU#53                      | 4  | 3  | 0  | 1  | 0  | 0  | 0  | 0  | 0  | 0  | 0  | 0  | 0  | 0 |
| Rikenella_OTU#54                       | 1  | 0  | 0  | 0  | 0  | 0  | 0  | 1  | 0  | 0  | 0  | 0  | 0  | 0 |
| Parasutterella_OTU#55                  | 25 | 25 | 26 | 41 | 92 | 40 | 24 | 19 | 39 | 20 | 10 | 34 | 24 | 7 |
| Lawsonia_OTU#56                        | 2  | 1  | 0  | 0  | 2  | 0  | 0  | 0  | 0  | 0  | 0  | 0  | 0  | 1 |
| Limibacter_OTU#57                      | 1  | 0  | 1  | 3  | 0  | 0  | 0  | 0  | 0  | 0  | 0  | 0  | 0  | 0 |
| Paludibacter_OTU#58                    | 1  | 0  | 0  | 1  | 0  | 1  | 0  | 0  | 0  | 1  | 0  | 0  | 0  | 0 |
| Anaerophaga_OTU#59                     | 3  | 2  | 5  | 4  | 5  | 0  | 0  | 0  | 1  | 0  | 1  | 1  | 1  | 0 |
| unclassified Porphyromonadaceae_OTU#60 | 1  | 0  | 2  | 1  | 0  | 0  | 0  | 0  | 0  | 0  | 0  | 0  | 0  | 0 |
| Paraprevotella_OTU#61                  | 1  | 0  | 0  | 0  | 0  | 0  | 0  | 0  | 0  | 0  | 0  | 0  | 0  | 0 |
| Anaerophaga_OTU#62                     | 1  | 0  | 1  | 1  | 0  | 0  | 0  | 0  | 0  | 0  | 0  | 0  | 0  | 0 |
| Helicobacter_OTU#63                    | 2  | 95 | 2  | 0  | 0  | 0  | 0  | 0  | 0  | 0  | 0  | 0  | 0  | 0 |
| Limibacter_OTU#64                      | 1  | 3  | 3  | 1  | 0  | 0  | 0  | 0  | 0  | 0  | 1  | 1  | 1  | 0 |
| Paludibacter_OTU#65                    | 1  | 0  | 0  | 0  | 0  | 0  | 0  | 0  | 0  | 0  | 0  | 0  | 0  | 0 |
| Paludibacter_OTU#66                    | 1  | 0  | 2  | 0  | 0  | 1  | 0  | 0  | 0  | 4  | 2  | 1  | 4  | 2 |
| Paludibacter_OTU#67                    | 3  | 0  | 0  | 1  | 4  | 7  | 4  | 3  | 5  | 5  | 6  | 2  | 7  | 4 |
| Paludibacter_OTU#68                    | 1  | 0  | 0  | 0  | 0  | 0  | 0  | 0  | 0  | 0  | 0  | 0  | 0  | 0 |
| Paludibacter_OTU#69                    | 1  | 0  | 0  | 0  | 0  | 0  | 0  | 0  | 0  | 0  | 0  | 0  | 0  | 0 |
| Parabacteroides_OTU#70                 | 1  | 0  | 0  | 0  | 0  | 0  | 0  | 0  | 2  | 4  | 0  | 3  | 0  | 0 |
| Bacteroides_OTU#71                     | 3  | 0  | 1  | 0  | 0  | 0  | 0  | 0  | 0  | 0  | 0  | 0  | 0  | 0 |
| Paludibacter_OTU#72                    | 1  | 2  | 1  | 1  | 0  | 0  | 0  | 0  | 0  | 0  | 0  | 0  | 0  | 0 |
| Paludibacter_OTU#73                    | 1  | 0  | 0  | 0  | 0  | 0  | 0  | 0  | 0  | 0  | 0  | 0  | 0  | 0 |
| Paludibacter_OTU#74                    | 1  | 0  | 0  | 0  | 0  | 0  | 0  | 0  | 0  | 0  | 0  | 0  | 0  | 0 |
| Olsenella_OTU#75                       | 1  | 0  | 0  | 0  | 0  | 0  | 0  | 0  | 0  | 0  | 0  | 0  | 0  | 0 |
| Allobaculum_OTU#76                     | 1  | 1  | 0  | 0  | 0  | 0  | 0  | 0  | 0  | 0  | 0  | 0  | 0  | 0 |
| Paludibacter_OTU#77                    | 1  | 0  | 0  | 1  | 0  | 0  | 0  | 0  | 0  | 0  | 0  | 1  | 0  | 0 |
| Paludibacter_OTU#78                    | 1  | 0  | 0  | 0  | 0  | 0  | 0  | 0  | 0  | 0  | 0  | 0  | 0  | 0 |
| Barnesiella_OTU#79                     | 1  | 0  | 0  | 0  | 0  | 0  | 0  | 0  | 0  | 0  | 0  | 0  | 0  | 0 |
| Paludibacter_OTU#80                    | 1  | 0  | 0  | 0  | 1  | 3  | 1  | 0  | 2  | 4  | 2  | 5  | 4  | 0 |

Supplementary Table 3



|                                    |   |   |   |   |   |   |   |   |   |   |   |   |   |   |
|------------------------------------|---|---|---|---|---|---|---|---|---|---|---|---|---|---|
| Paludibacter_OTU#81                | 1 | 0 | 0 | 6 | 0 | 1 | 2 | 0 | 1 | 0 | 1 | 0 | 0 | 2 |
| Ureaplasma_OTU#82                  | 7 | 8 | 8 | 4 | 0 | 0 | 0 | 0 | 0 | 0 | 0 | 0 | 0 | 0 |
| Anaerophaga_OTU#83                 | 1 | 0 | 0 | 0 | 0 | 0 | 0 | 0 | 0 | 0 | 0 | 1 | 0 | 0 |
| Paludibacter_OTU#84                | 2 | 1 | 0 | 1 | 0 | 0 | 0 | 0 | 0 | 0 | 0 | 0 | 0 | 0 |
| Allobaculum_OTU#85                 | 1 | 0 | 0 | 0 | 0 | 0 | 0 | 0 | 0 | 0 | 0 | 0 | 0 | 0 |
| Anaerophaga_OTU#86                 | 1 | 0 | 2 | 1 | 0 | 0 | 0 | 0 | 0 | 0 | 0 | 0 | 0 | 0 |
| Paludibacter_OTU#87                | 1 | 0 | 0 | 0 | 1 | 0 | 1 | 0 | 0 | 0 | 0 | 0 | 0 | 0 |
| Barnesiella_OTU#88                 | 1 | 0 | 0 | 0 | 0 | 0 | 0 | 0 | 0 | 0 | 0 | 0 | 0 | 0 |
| Limibacter_OTU#89                  | 2 | 2 | 3 | 2 | 0 | 0 | 0 | 0 | 0 | 0 | 0 | 0 | 0 | 0 |
| unclassified Bacteroidales_OTU#90  | 1 | 0 | 0 | 0 | 1 | 0 | 0 | 0 | 0 | 0 | 2 | 1 | 1 | 0 |
| Lawsonia_OTU#91                    | 2 | 0 | 0 | 0 | 0 | 0 | 0 | 0 | 0 | 0 | 0 | 0 | 0 | 0 |
| Anaerotruncus_OTU#92               | 1 | 1 | 0 | 1 | 0 | 0 | 1 | 4 | 1 | 2 | 0 | 0 | 0 | 0 |
| Paludibacter_OTU#93                | 1 | 0 | 0 | 0 | 0 | 0 | 0 | 0 | 0 | 0 | 1 | 0 | 0 | 0 |
| Tannerella_OTU#94                  | 1 | 0 | 0 | 0 | 0 | 0 | 0 | 0 | 0 | 0 | 0 | 0 | 0 | 0 |
| Barnesiella_OTU#95                 | 1 | 0 | 0 | 0 | 0 | 0 | 0 | 0 | 0 | 0 | 0 | 0 | 0 | 0 |
| Paludibacter_OTU#96                | 1 | 0 | 0 | 0 | 0 | 0 | 0 | 0 | 0 | 0 | 0 | 0 | 0 | 0 |
| Limibacter_OTU#97                  | 1 | 0 | 1 | 1 | 0 | 0 | 0 | 0 | 0 | 0 | 0 | 0 | 0 | 0 |
| Butyricicoccus_OTU#98              | 1 | 0 | 0 | 0 | 0 | 0 | 0 | 0 | 0 | 0 | 0 | 0 | 1 | 0 |
| Barnesiella_OTU#99                 | 1 | 0 | 1 | 0 | 1 | 0 | 0 | 0 | 0 | 0 | 0 | 0 | 0 | 1 |
| Paludibacter_OTU#100               | 1 | 1 | 0 | 0 | 1 | 1 | 0 | 0 | 0 | 0 | 0 | 0 | 1 | 0 |
| Paludibacter_OTU#101               | 1 | 0 | 0 | 0 | 0 | 0 | 0 | 0 | 0 | 0 | 1 | 0 | 0 | 0 |
| unclassified Bacteroidetes_OTU#102 | 1 | 0 | 1 | 0 | 0 | 0 | 0 | 0 | 0 | 0 | 0 | 0 | 2 | 0 |
| Paludibacter_OTU#103               | 1 | 0 | 3 | 2 | 0 | 2 | 0 | 2 | 4 | 3 | 0 | 2 | 1 | 0 |
| Paludibacter_OTU#104               | 1 | 0 | 2 | 0 | 0 | 0 | 0 | 0 | 0 | 0 | 0 | 0 | 0 | 0 |
| Paludibacter_OTU#105               | 1 | 0 | 1 | 0 | 0 | 0 | 0 | 0 | 0 | 0 | 0 | 0 | 0 | 0 |
| Anaerophaga_OTU#106                | 1 | 0 | 1 | 0 | 0 | 0 | 1 | 0 | 0 | 1 | 0 | 1 | 0 | 0 |
| Paludibacter_OTU#107               | 1 | 1 | 1 | 0 | 1 | 3 | 1 | 1 | 0 | 4 | 1 | 1 | 1 | 1 |
| Anaerophaga_OTU#108                | 1 | 0 | 1 | 0 | 0 | 0 | 0 | 0 | 1 | 0 | 0 | 0 | 0 | 0 |
| Paludibacter_OTU#109               | 1 | 0 | 0 | 0 | 0 | 0 | 0 | 0 | 0 | 0 | 0 | 0 | 0 | 0 |
| Paludibacter_OTU#110               | 3 | 4 | 1 | 2 | 3 | 1 | 3 | 1 | 0 | 4 | 2 | 2 | 2 | 0 |

Supplementary Table 3

|                        |   |   |   |   |   |   |   |   |    |   |   |   |   |   |
|------------------------|---|---|---|---|---|---|---|---|----|---|---|---|---|---|
| Paludibacter_OTU#111   | 1 | 0 | 1 | 1 | 0 | 0 | 0 | 1 | 0  | 0 | 0 | 2 | 0 | 0 |
| Limibacter_OTU#112     | 1 | 0 | 0 | 0 | 1 | 0 | 1 | 0 | 1  | 0 | 3 | 0 | 1 | 1 |
| Butyrivibrio_OTU#113   | 1 | 0 | 0 | 0 | 0 | 0 | 0 | 0 | 0  | 0 | 0 | 0 | 0 | 0 |
| Paludibacter_OTU#114   | 1 | 1 | 0 | 0 | 3 | 2 | 2 | 2 | 0  | 4 | 2 | 0 | 2 | 3 |
| Paludibacter_OTU#115   | 3 | 2 | 1 | 1 | 0 | 0 | 0 | 0 | 0  | 0 | 0 | 0 | 0 | 0 |
| Paludibacter_OTU#116   | 1 | 0 | 0 | 0 | 0 | 0 | 0 | 0 | 0  | 0 | 0 | 0 | 0 | 0 |
| Blautia_OTU#117        | 1 | 0 | 2 | 0 | 0 | 1 | 0 | 0 | 1  | 0 | 0 | 0 | 0 | 0 |
| Limibacter_OTU#118     | 1 | 1 | 1 | 3 | 0 | 2 | 3 | 2 | 0  | 4 | 3 | 0 | 2 | 3 |
| Parasutterella_OTU#119 | 2 | 2 | 5 | 2 | 0 | 0 | 0 | 0 | 0  | 0 | 0 | 0 | 0 | 0 |
| Parasutterella_OTU#120 | 1 | 0 | 0 | 0 | 0 | 0 | 0 | 0 | 0  | 0 | 0 | 0 | 0 | 0 |
| Tannerella_OTU#121     | 1 | 0 | 1 | 1 | 0 | 0 | 0 | 0 | 0  | 0 | 0 | 0 | 0 | 0 |
| Limibacter_OTU#122     | 1 | 0 | 0 | 0 | 0 | 0 | 0 | 0 | 0  | 0 | 0 | 0 | 0 | 0 |
| Paludibacter_OTU#123   | 1 | 3 | 2 | 0 | 1 | 1 | 0 | 0 | 0  | 0 | 0 | 0 | 3 | 0 |
| Limibacter_OTU#124     | 1 | 0 | 0 | 1 | 0 | 0 | 0 | 0 | 0  | 0 | 0 | 0 | 0 | 0 |
| Limibacter_OTU#125     | 2 | 1 | 0 | 3 | 2 | 2 | 5 | 3 | 15 | 0 | 3 | 2 | 3 | 6 |
| Barnesiella_OTU#126    | 1 | 0 | 0 | 0 | 0 | 0 | 0 | 0 | 0  | 0 | 0 | 0 | 0 | 0 |
| Olsenella_OTU#127      | 2 | 1 | 3 | 7 | 0 | 0 | 1 | 0 | 0  | 0 | 0 | 0 | 1 | 0 |
| Limibacter_OTU#128     | 1 | 0 | 0 | 0 | 0 | 0 | 0 | 0 | 0  | 0 | 0 | 0 | 0 | 0 |
| Paludibacter_OTU#129   | 1 | 0 | 0 | 0 | 0 | 0 | 0 | 0 | 0  | 0 | 0 | 1 | 0 | 0 |
| Tannerella_OTU#130     | 1 | 0 | 0 | 0 | 0 | 0 | 0 | 0 | 0  | 0 | 0 | 0 | 0 | 0 |
| Rikenella_OTU#131      | 1 | 1 | 0 | 1 | 0 | 0 | 0 | 0 | 0  | 1 | 1 | 1 | 0 | 0 |
| Limibacter_OTU#132     | 1 | 1 | 3 | 0 | 0 | 0 | 0 | 0 | 0  | 0 | 1 | 0 | 0 | 0 |
| Barnesiella_OTU#133    | 1 | 0 | 0 | 0 | 0 | 0 | 0 | 0 | 0  | 0 | 0 | 0 | 0 | 0 |
| Paludibacter_OTU#134   | 1 | 1 | 0 | 0 | 0 | 1 | 0 | 0 | 0  | 1 | 0 | 0 | 0 | 0 |
| Roseburia_OTU#135      | 1 | 0 | 0 | 0 | 0 | 0 | 0 | 1 | 0  | 0 | 0 | 0 | 0 | 0 |
| Limibacter_OTU#136     | 1 | 0 | 3 | 0 | 0 | 0 | 0 | 0 | 0  | 0 | 0 | 0 | 0 | 0 |
| Anaerophaga_OTU#137    | 1 | 0 | 0 | 0 | 0 | 0 | 0 | 0 | 0  | 0 | 0 | 0 | 0 | 0 |
| Parasutterella_OTU#138 | 2 | 1 | 3 | 2 | 0 | 0 | 0 | 0 | 0  | 0 | 0 | 0 | 0 | 0 |
| Rikenella_OTU#139      | 1 | 0 | 0 | 1 | 0 | 0 | 0 | 0 | 0  | 0 | 0 | 0 | 1 | 0 |
| Barnesiella_OTU#140    | 1 | 0 | 0 | 0 | 0 | 0 | 0 | 0 | 0  | 0 | 0 | 0 | 0 | 0 |

Supplementary Table 3

|                                    |   |   |   |   |    |    |    |    |    |    |    |    |    |    |
|------------------------------------|---|---|---|---|----|----|----|----|----|----|----|----|----|----|
| Barnesiella_OTU#141                | 1 | 0 | 0 | 0 | 0  | 0  | 0  | 0  | 0  | 0  | 0  | 0  | 0  | 0  |
| Limibacter_OTU#142                 | 2 | 3 | 2 | 2 | 0  | 2  | 0  | 0  | 0  | 1  | 1  | 2  | 1  | 1  |
| Parasporobacterium_OTU#143         | 1 | 0 | 0 | 0 | 0  | 0  | 0  | 0  | 0  | 0  | 0  | 0  | 0  | 0  |
| Barnesiella_OTU#144                | 1 | 0 | 0 | 0 | 0  | 0  | 0  | 0  | 0  | 0  | 0  | 0  | 0  | 0  |
| Olsenella_OTU#145                  | 1 | 0 | 0 | 0 | 0  | 0  | 0  | 0  | 0  | 0  | 0  | 0  | 0  | 0  |
| Escherichia/Shigella_OTU#146       | 1 | 0 | 0 | 0 | 0  | 0  | 0  | 0  | 0  | 0  | 0  | 0  | 0  | 0  |
| Anaerophaga_OTU#147                | 1 | 2 | 1 | 2 | 0  | 0  | 1  | 1  | 0  | 1  | 0  | 0  | 1  | 0  |
| Tannerella_OTU#148                 | 1 | 1 | 0 | 0 | 2  | 2  | 1  | 0  | 0  | 4  | 3  | 2  | 1  | 0  |
| Paludibacter_OTU#149               | 1 | 0 | 0 | 0 | 0  | 0  | 0  | 0  | 0  | 0  | 1  | 0  | 0  | 0  |
| unclassified Bacteroidetes_OTU#150 | 1 | 0 | 3 | 2 | 1  | 0  | 1  | 0  | 3  | 0  | 1  | 3  | 2  | 1  |
| Rikenella_OTU#151                  | 1 | 0 | 0 | 0 | 0  | 0  | 0  | 0  | 0  | 0  | 0  | 0  | 0  | 0  |
| Marvinbryantia_OTU#152             | 1 | 3 | 1 | 0 | 0  | 1  | 51 | 48 | 75 | 10 | 0  | 1  | 0  | 0  |
| Rikenella_OTU#153                  | 1 | 0 | 1 | 0 | 0  | 0  | 1  | 0  | 0  | 0  | 0  | 0  | 0  | 0  |
| Paludibacter_OTU#154               | 1 | 1 | 2 | 2 | 3  | 6  | 2  | 2  | 0  | 1  | 6  | 1  | 1  | 1  |
| Paludibacter_OTU#155               | 1 | 0 | 0 | 0 | 0  | 0  | 0  | 0  | 0  | 0  | 1  | 0  | 0  | 0  |
| Barnesiella_OTU#156                | 1 | 0 | 0 | 0 | 0  | 0  | 0  | 0  | 0  | 0  | 0  | 0  | 0  | 0  |
| Tannerella_OTU#157                 | 1 | 0 | 2 | 0 | 4  | 5  | 2  | 3  | 2  | 6  | 4  | 6  | 0  | 2  |
| Paludibacter_OTU#158               | 1 | 0 | 2 | 0 | 0  | 0  | 0  | 0  | 0  | 0  | 0  | 0  | 0  | 0  |
| Barnesiella_OTU#159                | 1 | 0 | 0 | 0 | 0  | 0  | 0  | 0  | 0  | 0  | 0  | 0  | 0  | 0  |
| Paludibacter_OTU#160               | 1 | 0 | 0 | 0 | 0  | 0  | 0  | 0  | 0  | 0  | 0  | 0  | 0  | 0  |
| Anaerophaga_OTU#161                | 1 | 0 | 0 | 0 | 0  | 0  | 0  | 0  | 0  | 0  | 0  | 0  | 0  | 0  |
| Paludibacter_OTU#162               | 1 | 1 | 4 | 2 | 26 | 19 | 27 | 27 | 21 | 26 | 22 | 20 | 34 | 19 |
| Allobaculum_OTU#163                | 1 | 1 | 1 | 0 | 0  | 0  | 0  | 0  | 0  | 0  | 0  | 0  | 0  | 0  |
| Barnesiella_OTU#164                | 1 | 0 | 0 | 0 | 0  | 0  | 0  | 0  | 0  | 0  | 0  | 0  | 0  | 0  |
| Rikenella_OTU#165                  | 1 | 0 | 3 | 1 | 1  | 1  | 1  | 2  | 0  | 0  | 0  | 1  | 1  | 0  |
| Barnesiella_OTU#166                | 1 | 0 | 1 | 1 | 1  | 2  | 1  | 2  | 0  | 0  | 1  | 0  | 1  | 1  |
| Barnesiella_OTU#167                | 1 | 0 | 0 | 0 | 0  | 0  | 0  | 0  | 0  | 0  | 0  | 0  | 0  | 0  |
| Rikenella_OTU#168                  | 1 | 0 | 0 | 1 | 0  | 0  | 0  | 0  | 0  | 0  | 0  | 1  | 0  | 0  |
| Paludibacter_OTU#169               | 0 | 0 | 0 | 0 | 3  | 3  | 4  | 1  | 3  | 2  | 4  | 2  | 12 | 4  |
| Howardella_OTU#170                 | 0 | 0 | 0 | 0 | 0  | 0  | 0  | 0  | 1  | 0  | 0  | 0  | 0  | 0  |

Supplementary Table 3

|                         |   |   |   |   |    |    |    |    |    |    |    |    |     |    |
|-------------------------|---|---|---|---|----|----|----|----|----|----|----|----|-----|----|
| Oscillibacter_OTU#171   | 0 | 0 | 0 | 0 | 0  | 0  | 0  | 0  | 1  | 0  | 0  | 0  | 0   | 0  |
| Robinsoniella_OTU#172   | 0 | 0 | 0 | 0 | 1  | 0  | 8  | 8  | 1  | 5  | 0  | 1  | 0   | 0  |
| Allobaculum_OTU#173     | 0 | 0 | 0 | 0 | 66 | 15 | 17 | 17 | 27 | 7  | 21 | 19 | 27  | 29 |
| Butyrivibrio_OTU#174    | 0 | 0 | 0 | 0 | 0  | 0  | 0  | 0  | 6  | 1  | 0  | 0  | 0   | 0  |
| Oscillibacter_OTU#175   | 0 | 1 | 2 | 0 | 0  | 0  | 0  | 0  | 1  | 0  | 0  | 0  | 0   | 0  |
| Lactonifactor_OTU#176   | 0 | 0 | 0 | 0 | 0  | 0  | 3  | 2  | 2  | 0  | 0  | 0  | 0   | 0  |
| Barnesiella_OTU#177     | 0 | 0 | 0 | 0 | 0  | 0  | 0  | 0  | 1  | 0  | 0  | 0  | 0   | 0  |
| Syntrophococcus_OTU#178 | 0 | 0 | 0 | 0 | 0  | 0  | 1  | 1  | 1  | 0  | 0  | 0  | 0   | 0  |
| Barnesiella_OTU#179     | 0 | 0 | 0 | 0 | 0  | 0  | 0  | 1  | 1  | 0  | 0  | 0  | 0   | 0  |
| Paludibacter_OTU#180    | 0 | 0 | 0 | 0 | 52 | 22 | 30 | 38 | 36 | 48 | 48 | 44 | 163 | 56 |
| Butyrivibrio_OTU#181    | 0 | 0 | 0 | 0 | 0  | 0  | 0  | 0  | 23 | 7  | 0  | 0  | 0   | 0  |
| Dorea_OTU#182           | 0 | 0 | 0 | 0 | 0  | 4  | 18 | 7  | 13 | 4  | 0  | 1  | 0   | 0  |
| Sporobacterium_OTU#183  | 0 | 0 | 0 | 0 | 0  | 0  | 0  | 0  | 1  | 0  | 0  | 0  | 0   | 0  |
| Paludibacter_OTU#184    | 0 | 0 | 0 | 0 | 1  | 1  | 0  | 0  | 1  | 0  | 0  | 0  | 0   | 0  |
| Solobacterium_OTU#185   | 0 | 0 | 0 | 0 | 0  | 0  | 0  | 0  | 1  | 0  | 0  | 0  | 0   | 0  |
| Limibacter_OTU#186      | 0 | 0 | 1 | 1 | 0  | 2  | 0  | 0  | 2  | 0  | 1  | 0  | 1   | 0  |
| Robinsoniella_OTU#187   | 0 | 0 | 0 | 0 | 0  | 0  | 0  | 0  | 1  | 0  | 0  | 0  | 0   | 0  |
| Hespellia_OTU#188       | 0 | 0 | 0 | 0 | 0  | 0  | 0  | 0  | 1  | 0  | 0  | 0  | 0   | 0  |
| Barnesiella_OTU#189     | 0 | 0 | 1 | 1 | 0  | 0  | 0  | 0  | 1  | 1  | 1  | 0  | 0   | 0  |
| Coproccoccus_OTU#190    | 0 | 0 | 0 | 0 | 0  | 0  | 0  | 1  | 2  | 0  | 0  | 0  | 0   | 0  |
| Anaerotruncus_OTU#191   | 0 | 0 | 0 | 0 | 0  | 0  | 0  | 0  | 3  | 0  | 0  | 0  | 0   | 0  |
| Marvinbryantia_OTU#192  | 0 | 0 | 0 | 0 | 0  | 0  | 4  | 2  | 6  | 0  | 0  | 0  | 0   | 0  |
| Dorea_OTU#193           | 0 | 0 | 0 | 0 | 0  | 0  | 0  | 0  | 1  | 0  | 0  | 0  | 0   | 0  |
| Limibacter_OTU#194      | 0 | 0 | 0 | 0 | 0  | 1  | 0  | 1  | 2  | 0  | 0  | 0  | 0   | 0  |
| Marvinbryantia_OTU#195  | 0 | 0 | 0 | 0 | 0  | 0  | 0  | 0  | 1  | 0  | 0  | 0  | 0   | 0  |
| Paludibacter_OTU#196    | 0 | 0 | 0 | 0 | 0  | 1  | 0  | 2  | 1  | 2  | 1  | 2  | 2   | 0  |
| Limibacter_OTU#197      | 0 | 0 | 0 | 0 | 0  | 0  | 0  | 0  | 1  | 1  | 0  | 0  | 0   | 0  |
| Lawsonia_OTU#198        | 0 | 0 | 0 | 0 | 0  | 0  | 1  | 0  | 1  | 0  | 0  | 1  | 0   | 1  |
| Dorea_OTU#199           | 0 | 0 | 0 | 0 | 0  | 0  | 0  | 0  | 1  | 0  | 0  | 0  | 0   | 0  |
| Roseburia_OTU#200       | 0 | 0 | 0 | 0 | 0  | 0  | 0  | 0  | 1  | 0  | 0  | 0  | 0   | 0  |

Supplementary Table 3

|                                  |   |   |   |   |   |   |   |   |    |   |   |   |   |   |
|----------------------------------|---|---|---|---|---|---|---|---|----|---|---|---|---|---|
| Barnesiella_OTU#201              | 0 | 0 | 0 | 0 | 2 | 1 | 6 | 2 | 2  | 0 | 2 | 0 | 0 | 4 |
| Butyricoccus_OTU#202             | 0 | 0 | 0 | 0 | 0 | 0 | 0 | 0 | 8  | 0 | 0 | 0 | 0 | 0 |
| Syntrophococcus_OTU#203          | 0 | 0 | 0 | 0 | 0 | 0 | 0 | 1 | 4  | 0 | 0 | 0 | 0 | 0 |
| Butyricoccus_OTU#204             | 0 | 0 | 1 | 0 | 0 | 0 | 0 | 3 | 1  | 0 | 0 | 0 | 0 | 0 |
| Paludibacter_OTU#205             | 0 | 0 | 0 | 0 | 0 | 0 | 0 | 0 | 1  | 0 | 0 | 0 | 0 | 0 |
| Oscillibacter_OTU#206            | 0 | 0 | 0 | 0 | 0 | 0 | 1 | 4 | 10 | 2 | 0 | 0 | 0 | 0 |
| Turicibacter_OTU#207             | 0 | 0 | 0 | 0 | 0 | 0 | 0 | 0 | 4  | 0 | 0 | 0 | 0 | 0 |
| Limibacter_OTU#208               | 0 | 0 | 0 | 0 | 0 | 0 | 0 | 0 | 1  | 0 | 0 | 0 | 0 | 0 |
| Robinsoniella_OTU#209            | 0 | 0 | 0 | 0 | 0 | 0 | 0 | 0 | 1  | 0 | 0 | 0 | 0 | 0 |
| Parasporobacterium_OTU#210       | 0 | 0 | 0 | 0 | 0 | 0 | 0 | 0 | 1  | 0 | 0 | 0 | 0 | 0 |
| Limibacter_OTU#211               | 0 | 1 | 0 | 0 | 0 | 0 | 0 | 1 | 1  | 0 | 0 | 0 | 0 | 0 |
| Paludibacter_OTU#212             | 0 | 0 | 0 | 0 | 0 | 0 | 0 | 0 | 1  | 0 | 0 | 1 | 0 | 0 |
| Hydrogenoanaerobacterium_OTU#213 | 0 | 0 | 0 | 0 | 0 | 0 | 0 | 0 | 1  | 0 | 0 | 0 | 0 | 0 |
| Blautia_OTU#214                  | 0 | 0 | 1 | 0 | 0 | 0 | 0 | 0 | 1  | 0 | 0 | 0 | 0 | 0 |
| Butyrivibrio_OTU#215             | 0 | 0 | 0 | 0 | 0 | 0 | 0 | 0 | 1  | 0 | 0 | 0 | 0 | 0 |
| Paludibacter_OTU#216             | 0 | 0 | 0 | 0 | 2 | 0 | 0 | 0 | 1  | 0 | 0 | 0 | 0 | 0 |
| Roseburia_OTU#217                | 0 | 0 | 0 | 0 | 0 | 0 | 0 | 0 | 1  | 0 | 0 | 0 | 0 | 0 |
| Parasporobacterium_OTU#218       | 0 | 0 | 0 | 0 | 0 | 0 | 0 | 0 | 1  | 0 | 0 | 0 | 0 | 0 |
| Anaerophaga_OTU#219              | 0 | 0 | 0 | 0 | 0 | 0 | 0 | 0 | 1  | 0 | 0 | 0 | 0 | 0 |
| Robinsoniella_OTU#220            | 0 | 0 | 0 | 0 | 0 | 0 | 0 | 0 | 1  | 0 | 0 | 0 | 0 | 0 |
| Barnesiella_OTU#221              | 0 | 0 | 0 | 0 | 0 | 1 | 0 | 0 | 1  | 0 | 1 | 0 | 0 | 0 |
| Acetitomaculum_OTU#222           | 0 | 0 | 0 | 0 | 0 | 0 | 1 | 1 | 2  | 2 | 0 | 0 | 0 | 0 |
| Butyrivibrio_OTU#223             | 0 | 0 | 0 | 0 | 0 | 0 | 0 | 0 | 1  | 0 | 0 | 0 | 0 | 0 |
| Paludibacter_OTU#224             | 0 | 0 | 0 | 0 | 1 | 0 | 1 | 0 | 1  | 0 | 1 | 0 | 3 | 2 |
| Allobaculum_OTU#225              | 0 | 0 | 0 | 0 | 0 | 0 | 0 | 0 | 1  | 0 | 0 | 0 | 0 | 0 |
| Limibacter_OTU#226               | 0 | 0 | 0 | 0 | 0 | 0 | 1 | 0 | 1  | 0 | 0 | 0 | 1 | 0 |
| Paludibacter_OTU#227             | 0 | 0 | 0 | 0 | 0 | 0 | 0 | 0 | 1  | 0 | 0 | 0 | 0 | 0 |
| Syntrophococcus_OTU#228          | 0 | 0 | 0 | 0 | 0 | 0 | 0 | 0 | 1  | 0 | 0 | 0 | 0 | 0 |
| Paludibacter_OTU#229             | 0 | 0 | 1 | 0 | 0 | 0 | 1 | 0 | 1  | 0 | 1 | 2 | 0 | 1 |
| Barnesiella_OTU#230              | 0 | 0 | 0 | 0 | 0 | 0 | 0 | 0 | 1  | 0 | 1 | 0 | 0 | 0 |

Supplementary Table 3

|                                         |   |   |   |   |    |    |   |   |   |    |    |    |    |    |
|-----------------------------------------|---|---|---|---|----|----|---|---|---|----|----|----|----|----|
| Limibacter_OTU#231                      | 0 | 0 | 0 | 0 | 1  | 1  | 0 | 2 | 1 | 1  | 0  | 0  | 0  | 0  |
| Marvinbryantia_OTU#232                  | 0 | 0 | 0 | 0 | 0  | 0  | 0 | 0 | 1 | 0  | 0  | 0  | 0  | 0  |
| Paludibacter_OTU#233                    | 0 | 0 | 0 | 0 | 0  | 0  | 1 | 0 | 1 | 0  | 0  | 0  | 0  | 0  |
| unclassified Lachnospiraceae_OTU#234    | 0 | 0 | 0 | 0 | 0  | 0  | 1 | 0 | 1 | 0  | 0  | 0  | 0  | 0  |
| Heliobacillus_OTU#235                   | 0 | 0 | 0 | 0 | 0  | 0  | 0 | 0 | 1 | 0  | 0  | 0  | 0  | 0  |
| Allobaculum_OTU#236                     | 0 | 0 | 0 | 0 | 8  | 4  | 0 | 3 | 5 | 0  | 5  | 2  | 7  | 5  |
| Anaerostipes_OTU#237                    | 0 | 0 | 0 | 0 | 1  | 0  | 1 | 0 | 4 | 1  | 0  | 0  | 1  | 0  |
| Limibacter_OTU#238                      | 0 | 0 | 0 | 0 | 0  | 0  | 0 | 1 | 3 | 0  | 0  | 1  | 4  | 2  |
| Anaerophaga_OTU#239                     | 0 | 0 | 0 | 0 | 0  | 0  | 0 | 0 | 1 | 0  | 0  | 0  | 0  | 0  |
| Dorea_OTU#240                           | 0 | 0 | 0 | 0 | 0  | 0  | 0 | 0 | 1 | 0  | 0  | 0  | 0  | 0  |
| Anaerophaga_OTU#241                     | 0 | 0 | 0 | 0 | 9  | 1  | 5 | 1 | 3 | 14 | 20 | 18 | 56 | 21 |
| Coprococcus_OTU#242                     | 0 | 0 | 0 | 0 | 0  | 0  | 0 | 0 | 1 | 0  | 0  | 0  | 0  | 0  |
| unclassified Ruminococcaceae_OTU#243    | 0 | 0 | 0 | 0 | 0  | 0  | 0 | 0 | 2 | 0  | 0  | 0  | 0  | 0  |
| Coprococcus_OTU#244                     | 0 | 0 | 0 | 0 | 0  | 0  | 0 | 0 | 1 | 0  | 0  | 0  | 0  | 0  |
| Paludibacter_OTU#245                    | 0 | 0 | 0 | 0 | 1  | 1  | 0 | 1 | 1 | 0  | 1  | 0  | 0  | 0  |
| Robinsoniella_OTU#246                   | 0 | 0 | 0 | 0 | 0  | 0  | 0 | 1 | 1 | 0  | 0  | 0  | 0  | 0  |
| Paludibacter_OTU#247                    | 0 | 1 | 4 | 1 | 6  | 11 | 0 | 3 | 4 | 3  | 9  | 6  | 8  | 4  |
| Butyricicoccus_OTU#248                  | 0 | 0 | 0 | 0 | 0  | 0  | 0 | 0 | 1 | 0  | 0  | 0  | 0  | 0  |
| Robinsoniella_OTU#249                   | 0 | 0 | 0 | 0 | 0  | 0  | 0 | 0 | 1 | 0  | 0  | 0  | 0  | 0  |
| Paludibacter_OTU#250                    | 0 | 0 | 1 | 0 | 1  | 0  | 0 | 0 | 1 | 0  | 0  | 0  | 0  | 1  |
| unclassified Lachnospiraceae_OTU#251    | 0 | 0 | 0 | 0 | 0  | 0  | 1 | 1 | 1 | 1  | 0  | 0  | 0  | 0  |
| unclassified Bacteroidales_OTU#252      | 0 | 0 | 0 | 0 | 0  | 0  | 0 | 0 | 1 | 1  | 0  | 3  | 0  | 1  |
| Blautia_OTU#253                         | 0 | 0 | 0 | 0 | 0  | 0  | 0 | 2 | 3 | 2  | 0  | 0  | 0  | 0  |
| Allobaculum_OTU#254                     | 0 | 3 | 0 | 1 | 1  | 1  | 2 | 0 | 3 | 0  | 1  | 0  | 1  | 0  |
| Paludibacter_OTU#255                    | 0 | 0 | 0 | 0 | 0  | 1  | 0 | 0 | 1 | 0  | 0  | 1  | 0  | 0  |
| Anaerophaga_OTU#256                     | 0 | 0 | 0 | 0 | 0  | 0  | 0 | 0 | 1 | 0  | 0  | 0  | 0  | 0  |
| Paludibacter_OTU#257                    | 0 | 0 | 0 | 0 | 10 | 6  | 3 | 3 | 5 | 6  | 5  | 8  | 15 | 3  |
| Anaerophaga_OTU#258                     | 0 | 0 | 0 | 0 | 0  | 0  | 0 | 0 | 1 | 0  | 0  | 0  | 0  | 0  |
| Marvinbryantia_OTU#259                  | 0 | 0 | 0 | 0 | 0  | 0  | 2 | 0 | 4 | 0  | 0  | 0  | 0  | 0  |
| unclassified Porphyromonadaceae_OTU#260 | 0 | 0 | 1 | 0 | 2  | 4  | 0 | 3 | 1 | 6  | 0  | 4  | 0  | 0  |

Supplementary Table 3

|                            |   |   |   |   |   |   |   |    |   |   |   |   |   |   |
|----------------------------|---|---|---|---|---|---|---|----|---|---|---|---|---|---|
| Barnesiella_OTU#261        | 0 | 0 | 0 | 0 | 1 | 6 | 0 | 2  | 1 | 3 | 0 | 3 | 0 | 1 |
| Paludibacter_OTU#262       | 0 | 0 | 0 | 0 | 0 | 0 | 0 | 0  | 1 | 0 | 0 | 0 | 0 | 0 |
| Paludibacter_OTU#263       | 0 | 0 | 0 | 0 | 1 | 0 | 0 | 0  | 4 | 1 | 0 | 2 | 0 | 1 |
| Paludibacter_OTU#264       | 0 | 0 | 0 | 1 | 4 | 3 | 2 | 0  | 1 | 1 | 1 | 2 | 0 | 2 |
| Coprococcus_OTU#265        | 0 | 0 | 0 | 0 | 0 | 0 | 0 | 0  | 1 | 0 | 0 | 0 | 0 | 0 |
| Allobaculum_OTU#266        | 0 | 0 | 0 | 0 | 0 | 0 | 0 | 0  | 1 | 0 | 0 | 0 | 0 | 0 |
| Barnesiella_OTU#267        | 0 | 0 | 0 | 0 | 2 | 1 | 0 | 4  | 1 | 0 | 2 | 0 | 0 | 0 |
| Paludibacter_OTU#268       | 0 | 0 | 0 | 0 | 1 | 0 | 1 | 0  | 1 | 2 | 0 | 0 | 1 | 0 |
| Marvinbryantia_OTU#269     | 0 | 0 | 0 | 0 | 0 | 0 | 0 | 0  | 1 | 2 | 0 | 0 | 0 | 0 |
| Allobaculum_OTU#270        | 0 | 0 | 0 | 0 | 0 | 0 | 1 | 1  | 2 | 0 | 1 | 0 | 0 | 0 |
| Robinsoniella_OTU#271      | 0 | 0 | 0 | 0 | 0 | 0 | 2 | 0  | 1 | 0 | 0 | 0 | 0 | 0 |
| Parasporobacterium_OTU#272 | 0 | 1 | 0 | 0 | 0 | 0 | 0 | 0  | 2 | 0 | 0 | 0 | 0 | 0 |
| Tannerella_OTU#273         | 0 | 0 | 0 | 0 | 0 | 0 | 0 | 0  | 1 | 2 | 0 | 0 | 0 | 0 |
| Anaerotruncus_OTU#274      | 0 | 0 | 0 | 0 | 0 | 0 | 0 | 0  | 1 | 0 | 0 | 0 | 0 | 0 |
| Syntrophococcus_OTU#275    | 0 | 0 | 1 | 0 | 0 | 0 | 1 | 1  | 3 | 2 | 0 | 0 | 0 | 0 |
| Anaerophaga_OTU#276        | 0 | 0 | 0 | 0 | 0 | 0 | 0 | 0  | 2 | 1 | 0 | 0 | 0 | 0 |
| Paludibacter_OTU#277       | 0 | 0 | 1 | 0 | 6 | 6 | 4 | 10 | 2 | 6 | 3 | 3 | 3 | 7 |
| Syntrophococcus_OTU#278    | 0 | 0 | 0 | 0 | 0 | 0 | 0 | 0  | 1 | 0 | 0 | 0 | 0 | 0 |
| Dorea_OTU#279              | 0 | 0 | 0 | 0 | 0 | 0 | 0 | 0  | 1 | 0 | 0 | 0 | 0 | 0 |
| Anaerotruncus_OTU#280      | 0 | 0 | 0 | 0 | 0 | 0 | 0 | 0  | 1 | 1 | 0 | 0 | 0 | 0 |
| Paludibacter_OTU#281       | 0 | 0 | 0 | 0 | 1 | 2 | 2 | 2  | 1 | 2 | 0 | 2 | 0 | 1 |
| Parasporobacterium_OTU#282 | 0 | 0 | 0 | 0 | 0 | 0 | 0 | 0  | 1 | 0 | 0 | 0 | 0 | 0 |
| Parvimonas_OTU#283         | 0 | 0 | 0 | 0 | 0 | 0 | 2 | 0  | 1 | 0 | 0 | 0 | 0 | 0 |
| Blautia_OTU#284            | 0 | 0 | 0 | 0 | 0 | 0 | 0 | 1  | 1 | 0 | 0 | 0 | 0 | 0 |
| Barnesiella_OTU#285        | 0 | 0 | 0 | 0 | 0 | 0 | 0 | 0  | 1 | 0 | 0 | 0 | 0 | 0 |
| Tannerella_OTU#286         | 0 | 0 | 0 | 0 | 2 | 2 | 0 | 1  | 1 | 0 | 1 | 3 | 1 | 1 |
| Prevotella_OTU#287         | 0 | 0 | 0 | 0 | 0 | 0 | 0 | 0  | 2 | 0 | 0 | 0 | 0 | 0 |
| Barnesiella_OTU#288        | 0 | 0 | 0 | 0 | 0 | 0 | 0 | 0  | 1 | 0 | 0 | 0 | 0 | 0 |
| Oscillibacter_OTU#289      | 0 | 0 | 0 | 0 | 0 | 1 | 0 | 0  | 1 | 0 | 0 | 0 | 0 | 0 |
| Oscillibacter_OTU#290      | 0 | 0 | 0 | 0 | 0 | 0 | 1 | 1  | 2 | 0 | 0 | 0 | 0 | 0 |

Supplementary Table 3

|                                         |   |   |   |   |   |   |   |   |   |   |   |   |   |   |
|-----------------------------------------|---|---|---|---|---|---|---|---|---|---|---|---|---|---|
| Allobaculum_OTU#291                     | 0 | 0 | 0 | 0 | 0 | 0 | 0 | 0 | 1 | 0 | 0 | 0 | 0 | 0 |
| Roseburia_OTU#292                       | 0 | 0 | 0 | 0 | 0 | 0 | 0 | 0 | 1 | 0 | 0 | 0 | 0 | 0 |
| Marvinbryantia_OTU#293                  | 0 | 0 | 0 | 0 | 0 | 0 | 0 | 0 | 1 | 0 | 0 | 0 | 0 | 0 |
| Lachnobacterium_OTU#294                 | 0 | 0 | 0 | 0 | 0 | 0 | 0 | 0 | 1 | 0 | 0 | 0 | 0 | 0 |
| Limibacter_OTU#295                      | 0 | 0 | 0 | 0 | 1 | 0 | 0 | 0 | 1 | 0 | 0 | 0 | 0 | 0 |
| Marvinbryantia_OTU#296                  | 0 | 0 | 0 | 0 | 0 | 0 | 0 | 0 | 1 | 0 | 0 | 0 | 0 | 0 |
| Oscillibacter_OTU#297                   | 0 | 0 | 0 | 0 | 0 | 0 | 0 | 0 | 1 | 0 | 0 | 0 | 0 | 0 |
| Limibacter_OTU#298                      | 0 | 2 | 3 | 0 | 0 | 0 | 0 | 0 | 5 | 0 | 0 | 0 | 0 | 0 |
| Lactonifactor_OTU#299                   | 0 | 0 | 0 | 0 | 0 | 0 | 0 | 0 | 1 | 0 | 0 | 0 | 0 | 0 |
| Limibacter_OTU#300                      | 0 | 0 | 0 | 0 | 0 | 0 | 0 | 0 | 1 | 0 | 0 | 0 | 0 | 0 |
| Faecalibacterium_OTU#301                | 0 | 0 | 0 | 0 | 0 | 0 | 0 | 0 | 1 | 0 | 0 | 0 | 0 | 0 |
| Paludibacter_OTU#302                    | 0 | 0 | 0 | 0 | 4 | 1 | 0 | 3 | 1 | 2 | 1 | 1 | 5 | 4 |
| Marvinbryantia_OTU#303                  | 0 | 0 | 0 | 0 | 1 | 2 | 2 | 0 | 1 | 0 | 1 | 0 | 0 | 0 |
| Coproccoccus_OTU#304                    | 0 | 0 | 0 | 0 | 0 | 0 | 0 | 0 | 1 | 0 | 0 | 0 | 0 | 0 |
| Acetanaerobacterium_OTU#305             | 0 | 0 | 0 | 0 | 0 | 1 | 2 | 3 | 1 | 2 | 0 | 0 | 0 | 0 |
| Coproccoccus_OTU#306                    | 0 | 0 | 0 | 0 | 0 | 0 | 3 | 1 | 1 | 0 | 0 | 0 | 0 | 0 |
| Coproccoccus_OTU#307                    | 0 | 1 | 0 | 0 | 0 | 0 | 2 | 1 | 1 | 0 | 0 | 0 | 0 | 0 |
| Acetitomaculum_OTU#308                  | 0 | 0 | 0 | 0 | 0 | 0 | 7 | 3 | 1 | 0 | 0 | 0 | 0 | 1 |
| Barnesiella_OTU#309                     | 0 | 0 | 0 | 0 | 0 | 0 | 0 | 0 | 1 | 0 | 0 | 0 | 1 | 0 |
| Paludibacter_OTU#310                    | 0 | 0 | 0 | 0 | 0 | 0 | 1 | 0 | 1 | 0 | 1 | 0 | 0 | 0 |
| Robinsoniella_OTU#311                   | 0 | 0 | 0 | 0 | 0 | 0 | 0 | 0 | 1 | 0 | 0 | 0 | 0 | 0 |
| Acetitomaculum_OTU#312                  | 0 | 0 | 0 | 0 | 0 | 0 | 0 | 0 | 1 | 0 | 0 | 0 | 0 | 0 |
| Paludibacter_OTU#313                    | 0 | 0 | 0 | 0 | 0 | 0 | 0 | 0 | 1 | 0 | 0 | 0 | 0 | 0 |
| Marvinbryantia_OTU#314                  | 0 | 0 | 0 | 0 | 0 | 0 | 0 | 0 | 1 | 0 | 0 | 0 | 0 | 0 |
| Paludibacter_OTU#315                    | 0 | 0 | 0 | 0 | 0 | 0 | 0 | 0 | 1 | 0 | 0 | 1 | 0 | 1 |
| Robinsoniella_OTU#316                   | 0 | 0 | 0 | 0 | 0 | 0 | 0 | 1 | 1 | 0 | 0 | 0 | 0 | 0 |
| Limibacter_OTU#317                      | 0 | 0 | 0 | 1 | 0 | 0 | 0 | 2 | 1 | 1 | 1 | 0 | 0 | 0 |
| unclassified Porphyromonadaceae_OTU#318 | 0 | 0 | 0 | 1 | 0 | 2 | 1 | 1 | 1 | 3 | 2 | 4 | 3 | 5 |
| Allobaculum_OTU#319                     | 0 | 0 | 0 | 0 | 4 | 1 | 1 | 1 | 1 | 0 | 3 | 2 | 5 | 2 |
| Marvinbryantia_OTU#320                  | 0 | 0 | 0 | 0 | 0 | 0 | 0 | 0 | 1 | 0 | 0 | 0 | 0 | 0 |

Supplementary Table 3



|                                         |   |    |   |   |   |    |   |   |   |   |   |   |   |   |
|-----------------------------------------|---|----|---|---|---|----|---|---|---|---|---|---|---|---|
| Lachnobacterium_OTU#321                 | 0 | 0  | 0 | 0 | 0 | 0  | 1 | 1 | 1 | 1 | 0 | 0 | 0 | 0 |
| Anaerophaga_OTU#322                     | 0 | 0  | 0 | 0 | 0 | 0  | 0 | 0 | 1 | 0 | 0 | 0 | 0 | 0 |
| Marvinbryantia_OTU#323                  | 0 | 0  | 0 | 0 | 0 | 0  | 0 | 0 | 1 | 0 | 0 | 0 | 0 | 0 |
| Lachnobacterium_OTU#324                 | 0 | 0  | 0 | 0 | 0 | 0  | 0 | 0 | 1 | 0 | 0 | 0 | 0 | 0 |
| Barnesiella_OTU#325                     | 0 | 1  | 0 | 0 | 2 | 1  | 0 | 3 | 1 | 0 | 0 | 0 | 2 | 1 |
| Butyricoccus_OTU#326                    | 0 | 0  | 0 | 0 | 0 | 0  | 0 | 0 | 1 | 0 | 0 | 0 | 0 | 0 |
| Paludibacter_OTU#327                    | 0 | 0  | 0 | 0 | 0 | 0  | 0 | 0 | 1 | 0 | 0 | 0 | 0 | 0 |
| Lactobacillus_OTU#328                   | 0 | 0  | 0 | 0 | 0 | 0  | 0 | 0 | 1 | 0 | 0 | 0 | 0 | 0 |
| Butyrivibrio_OTU#329                    | 0 | 0  | 0 | 0 | 0 | 0  | 0 | 0 | 1 | 0 | 0 | 0 | 0 | 0 |
| Atopobacter_OTU#330                     | 0 | 0  | 0 | 0 | 0 | 0  | 0 | 0 | 1 | 0 | 0 | 0 | 0 | 0 |
| Paludibacter_OTU#331                    | 0 | 0  | 0 | 0 | 0 | 0  | 0 | 0 | 1 | 0 | 0 | 0 | 0 | 0 |
| Paludibacter_OTU#332                    | 0 | 1  | 0 | 0 | 0 | 0  | 0 | 0 | 1 | 0 | 0 | 0 | 1 | 0 |
| Limibacter_OTU#333                      | 0 | 0  | 0 | 0 | 0 | 0  | 0 | 0 | 1 | 0 | 0 | 0 | 0 | 0 |
| Paludibacter_OTU#334                    | 0 | 2  | 4 | 2 | 6 | 10 | 5 | 6 | 1 | 7 | 2 | 4 | 3 | 5 |
| Paludibacter_OTU#335                    | 0 | 0  | 0 | 0 | 0 | 0  | 0 | 0 | 1 | 0 | 0 | 0 | 0 | 0 |
| Bulleidia_OTU#336                       | 0 | 0  | 0 | 0 | 0 | 0  | 0 | 0 | 1 | 0 | 0 | 0 | 0 | 0 |
| Anaerophaga_OTU#337                     | 0 | 0  | 0 | 1 | 0 | 0  | 0 | 2 | 2 | 2 | 2 | 3 | 2 | 1 |
| Dorea_OTU#338                           | 0 | 0  | 0 | 0 | 0 | 0  | 0 | 0 | 1 | 0 | 0 | 0 | 0 | 0 |
| Limibacter_OTU#339                      | 0 | 0  | 0 | 0 | 0 | 0  | 0 | 0 | 1 | 0 | 0 | 0 | 0 | 0 |
| unclassified Porphyromonadaceae_OTU#340 | 0 | 0  | 0 | 0 | 0 | 2  | 0 | 1 | 1 | 0 | 1 | 0 | 2 | 1 |
| Butyricoccus_OTU#341                    | 0 | 0  | 0 | 0 | 0 | 0  | 2 | 0 | 1 | 0 | 0 | 0 | 0 | 0 |
| Paludibacter_OTU#342                    | 0 | 0  | 0 | 0 | 0 | 0  | 0 | 0 | 1 | 0 | 0 | 0 | 0 | 0 |
| Mucispirillum_OTU#343                   | 0 | 9  | 0 | 0 | 0 | 0  | 0 | 0 | 0 | 0 | 0 | 0 | 0 | 0 |
| Paludibacter_OTU#344                    | 0 | 1  | 0 | 0 | 0 | 0  | 0 | 0 | 0 | 0 | 0 | 0 | 0 | 0 |
| unclassified Bacteroidales_OTU#345      | 0 | 1  | 0 | 0 | 0 | 1  | 0 | 0 | 0 | 0 | 0 | 0 | 0 | 0 |
| Helicobacter_OTU#346                    | 0 | 12 | 1 | 0 | 0 | 0  | 0 | 0 | 0 | 0 | 0 | 0 | 0 | 0 |
| unclassified Bacteroidales_OTU#347      | 0 | 1  | 0 | 0 | 0 | 0  | 0 | 0 | 0 | 1 | 0 | 0 | 0 | 0 |
| Limibacter_OTU#348                      | 0 | 1  | 0 | 0 | 0 | 0  | 0 | 0 | 0 | 0 | 0 | 0 | 0 | 0 |
| Pseudozobellia_OTU#349                  | 0 | 1  | 0 | 0 | 0 | 0  | 0 | 0 | 0 | 0 | 0 | 0 | 0 | 0 |
| Paludibacter_OTU#350                    | 0 | 2  | 0 | 0 | 0 | 0  | 0 | 0 | 0 | 0 | 0 | 0 | 0 | 0 |

Supplementary Table 3

|                                    |   |    |   |   |   |   |   |   |   |   |   |   |   |   |
|------------------------------------|---|----|---|---|---|---|---|---|---|---|---|---|---|---|
| Anaerotruncus_OTU#351              | 0 | 3  | 0 | 0 | 0 | 0 | 0 | 2 | 0 | 0 | 0 | 0 | 0 | 0 |
| Allobaculum_OTU#352                | 0 | 1  | 1 | 1 | 0 | 0 | 0 | 0 | 0 | 0 | 0 | 0 | 0 | 0 |
| Allobaculum_OTU#353                | 0 | 1  | 0 | 0 | 0 | 0 | 0 | 0 | 0 | 0 | 0 | 0 | 0 | 0 |
| Limibacter_OTU#354                 | 0 | 1  | 1 | 0 | 0 | 0 | 0 | 0 | 0 | 0 | 0 | 0 | 0 | 0 |
| Dorea_OTU#355                      | 0 | 1  | 0 | 0 | 0 | 0 | 0 | 0 | 0 | 0 | 0 | 0 | 0 | 0 |
| Mucispirillum_OTU#356              | 0 | 14 | 0 | 0 | 0 | 0 | 0 | 0 | 0 | 0 | 0 | 0 | 0 | 0 |
| Lactobacillus_OTU#357              | 0 | 6  | 1 | 5 | 0 | 0 | 0 | 0 | 0 | 0 | 0 | 0 | 0 | 0 |
| Coprococcus_OTU#358                | 0 | 1  | 0 | 0 | 0 | 0 | 0 | 0 | 0 | 0 | 0 | 0 | 0 | 0 |
| Limibacter_OTU#359                 | 0 | 1  | 0 | 0 | 0 | 0 | 0 | 0 | 0 | 0 | 0 | 0 | 0 | 0 |
| Rikenella_OTU#360                  | 0 | 1  | 0 | 0 | 0 | 0 | 0 | 0 | 0 | 0 | 0 | 0 | 0 | 0 |
| Caminicella_OTU#361                | 0 | 1  | 0 | 0 | 0 | 0 | 0 | 0 | 0 | 0 | 0 | 0 | 0 | 0 |
| Allobaculum_OTU#362                | 0 | 1  | 1 | 0 | 0 | 0 | 0 | 0 | 0 | 0 | 0 | 0 | 0 | 0 |
| Limibacter_OTU#363                 | 0 | 2  | 0 | 2 | 0 | 0 | 0 | 0 | 0 | 0 | 0 | 0 | 0 | 0 |
| Lachnobacterium_OTU#364            | 0 | 1  | 0 | 0 | 0 | 0 | 0 | 0 | 0 | 0 | 0 | 0 | 0 | 0 |
| unclassified Bacteroidales_OTU#365 | 0 | 1  | 3 | 0 | 0 | 0 | 0 | 0 | 0 | 0 | 0 | 0 | 0 | 0 |
| Anaerotruncus_OTU#366              | 0 | 1  | 0 | 0 | 0 | 0 | 0 | 0 | 0 | 0 | 0 | 0 | 0 | 0 |
| Calditerrivibrio_OTU#367           | 0 | 1  | 0 | 1 | 0 | 0 | 0 | 0 | 0 | 0 | 0 | 0 | 0 | 0 |
| Limibacter_OTU#368                 | 0 | 1  | 0 | 0 | 0 | 0 | 0 | 1 | 0 | 0 | 0 | 0 | 0 | 0 |
| unclassified Bacteroidetes_OTU#369 | 0 | 1  | 0 | 0 | 0 | 0 | 0 | 0 | 0 | 0 | 0 | 1 | 0 | 0 |
| Limibacter_OTU#370                 | 0 | 1  | 0 | 0 | 0 | 0 | 0 | 0 | 0 | 0 | 0 | 0 | 0 | 0 |
| Paludibacter_OTU#371               | 0 | 1  | 0 | 1 | 0 | 0 | 0 | 0 | 0 | 0 | 0 | 0 | 0 | 1 |
| Lachnobacterium_OTU#372            | 0 | 1  | 0 | 0 | 0 | 0 | 0 | 0 | 0 | 0 | 0 | 0 | 0 | 0 |
| Rikenella_OTU#373                  | 0 | 1  | 0 | 0 | 0 | 0 | 0 | 0 | 0 | 0 | 0 | 0 | 0 | 0 |
| Limibacter_OTU#374                 | 0 | 3  | 1 | 1 | 0 | 0 | 0 | 1 | 0 | 1 | 0 | 0 | 1 | 1 |
| Allobaculum_OTU#375                | 0 | 1  | 0 | 0 | 0 | 0 | 0 | 0 | 0 | 0 | 0 | 0 | 0 | 0 |
| Parasutterella_OTU#376             | 0 | 1  | 1 | 0 | 0 | 0 | 0 | 0 | 0 | 0 | 0 | 0 | 0 | 0 |
| Rikenella_OTU#377                  | 0 | 1  | 0 | 0 | 0 | 0 | 0 | 0 | 0 | 0 | 0 | 0 | 0 | 0 |
| Paludibacter_OTU#378               | 0 | 1  | 2 | 0 | 0 | 1 | 0 | 0 | 0 | 0 | 0 | 0 | 0 | 0 |
| Paludibacter_OTU#379               | 0 | 1  | 0 | 0 | 0 | 0 | 0 | 0 | 0 | 0 | 0 | 0 | 0 | 0 |
| Parasporobacterium_OTU#380         | 0 | 1  | 0 | 0 | 0 | 0 | 0 | 0 | 0 | 0 | 0 | 0 | 0 | 0 |

Supplementary Table 3

|                                    |   |   |   |   |   |   |   |   |   |   |   |   |   |   |
|------------------------------------|---|---|---|---|---|---|---|---|---|---|---|---|---|---|
| Rikenella_OTU#381                  | 0 | 1 | 0 | 0 | 0 | 0 | 0 | 0 | 0 | 0 | 0 | 0 | 0 | 0 |
| Lachnobacterium_OTU#382            | 0 | 1 | 0 | 0 | 0 | 0 | 0 | 0 | 0 | 0 | 0 | 0 | 0 | 0 |
| Coprococcus_OTU#383                | 0 | 1 | 0 | 0 | 0 | 0 | 0 | 0 | 0 | 0 | 0 | 0 | 0 | 0 |
| Paludibacter_OTU#384               | 0 | 1 | 0 | 0 | 0 | 0 | 0 | 0 | 0 | 0 | 0 | 0 | 0 | 0 |
| Anaerophaga_OTU#385                | 0 | 1 | 0 | 0 | 0 | 0 | 0 | 0 | 0 | 0 | 0 | 0 | 0 | 0 |
| Asaccharobacter_OTU#386            | 0 | 1 | 0 | 0 | 0 | 0 | 0 | 0 | 0 | 0 | 0 | 0 | 0 | 0 |
| Paludibacter_OTU#387               | 0 | 1 | 0 | 0 | 0 | 0 | 0 | 0 | 0 | 0 | 0 | 0 | 0 | 0 |
| Anaerophaga_OTU#388                | 0 | 1 | 0 | 0 | 0 | 0 | 0 | 0 | 0 | 0 | 0 | 0 | 0 | 0 |
| Paludibacter_OTU#389               | 0 | 2 | 0 | 1 | 0 | 0 | 0 | 0 | 0 | 2 | 2 | 1 | 1 | 0 |
| unclassified Bacteroidetes_OTU#390 | 0 | 1 | 0 | 1 | 0 | 0 | 0 | 0 | 0 | 0 | 0 | 0 | 0 | 0 |
| Limibacter_OTU#391                 | 0 | 1 | 1 | 0 | 0 | 0 | 0 | 0 | 0 | 0 | 1 | 0 | 0 | 0 |
| Paludibacter_OTU#392               | 0 | 1 | 0 | 0 | 0 | 0 | 0 | 0 | 0 | 0 | 0 | 0 | 0 | 0 |
| Parasutterella_OTU#393             | 0 | 2 | 1 | 2 | 0 | 0 | 0 | 0 | 0 | 0 | 0 | 0 | 0 | 0 |
| Limibacter_OTU#394                 | 0 | 1 | 0 | 0 | 0 | 0 | 0 | 0 | 0 | 0 | 0 | 0 | 0 | 0 |
| Lawsonia_OTU#395                   | 0 | 1 | 0 | 0 | 0 | 0 | 0 | 0 | 0 | 0 | 0 | 0 | 0 | 0 |
| Limibacter_OTU#396                 | 0 | 1 | 1 | 2 | 0 | 0 | 1 | 0 | 0 | 0 | 0 | 0 | 0 | 0 |
| Allobaculum_OTU#397                | 0 | 2 | 0 | 0 | 0 | 0 | 0 | 0 | 0 | 0 | 0 | 0 | 0 | 0 |
| Dorea_OTU#398                      | 0 | 1 | 0 | 0 | 0 | 0 | 0 | 1 | 0 | 0 | 0 | 0 | 0 | 0 |
| Anaerophaga_OTU#399                | 0 | 1 | 0 | 0 | 0 | 0 | 0 | 0 | 0 | 0 | 0 | 0 | 0 | 0 |
| Anaerophaga_OTU#400                | 0 | 1 | 0 | 1 | 1 | 1 | 0 | 0 | 0 | 1 | 0 | 0 | 1 | 1 |
| Acetanaerobacterium_OTU#401        | 0 | 1 | 0 | 0 | 0 | 0 | 0 | 0 | 0 | 0 | 0 | 0 | 0 | 0 |
| Paludibacter_OTU#402               | 0 | 1 | 0 | 0 | 0 | 0 | 0 | 0 | 0 | 0 | 0 | 0 | 0 | 0 |
| Barnesiella_OTU#403                | 0 | 1 | 0 | 0 | 0 | 0 | 0 | 0 | 0 | 0 | 0 | 0 | 0 | 0 |
| Limibacter_OTU#404                 | 0 | 1 | 0 | 0 | 0 | 0 | 0 | 0 | 0 | 0 | 2 | 0 | 0 | 0 |
| Anaerophaga_OTU#405                | 0 | 1 | 0 | 0 | 0 | 0 | 0 | 0 | 0 | 0 | 0 | 0 | 0 | 0 |
| Camnicella_OTU#406                 | 0 | 1 | 0 | 0 | 0 | 0 | 0 | 0 | 0 | 0 | 0 | 0 | 0 | 0 |
| Limibacter_OTU#407                 | 0 | 1 | 0 | 0 | 0 | 0 | 0 | 0 | 0 | 0 | 0 | 0 | 0 | 0 |
| Paludibacter_OTU#408               | 0 | 1 | 0 | 0 | 0 | 0 | 0 | 0 | 0 | 0 | 0 | 0 | 0 | 0 |
| Tannerella_OTU#409                 | 0 | 1 | 0 | 0 | 0 | 0 | 0 | 0 | 0 | 0 | 0 | 0 | 0 | 0 |
| Allobaculum_OTU#410                | 0 | 1 | 0 | 0 | 0 | 0 | 0 | 0 | 0 | 0 | 0 | 0 | 0 | 0 |

Supplementary Table 3

|                                      |   |   |   |   |   |   |   |   |   |    |   |   |   |   |
|--------------------------------------|---|---|---|---|---|---|---|---|---|----|---|---|---|---|
| Paludibacter_OTU#411                 | 0 | 1 | 0 | 0 | 0 | 0 | 0 | 0 | 0 | 0  | 0 | 0 | 0 | 0 |
| Parasutterella_OTU#412               | 0 | 1 | 0 | 0 | 0 | 0 | 0 | 0 | 0 | 0  | 0 | 0 | 0 | 0 |
| Paludibacter_OTU#413                 | 0 | 1 | 0 | 0 | 0 | 0 | 0 | 0 | 0 | 0  | 0 | 0 | 0 | 0 |
| Paludibacter_OTU#414                 | 0 | 1 | 0 | 0 | 0 | 0 | 0 | 0 | 0 | 0  | 0 | 0 | 0 | 0 |
| Lachnobacterium_OTU#415              | 0 | 1 | 0 | 0 | 0 | 0 | 0 | 0 | 0 | 0  | 0 | 0 | 0 | 0 |
| Allofustis_OTU#416                   | 0 | 1 | 0 | 0 | 0 | 0 | 0 | 0 | 0 | 0  | 0 | 0 | 0 | 0 |
| Parasporobacterium_OTU#417           | 0 | 1 | 0 | 0 | 0 | 0 | 0 | 0 | 0 | 0  | 0 | 0 | 0 | 0 |
| Acetanaerobacterium_OTU#418          | 0 | 1 | 0 | 0 | 0 | 0 | 0 | 0 | 0 | 0  | 0 | 0 | 0 | 0 |
| Pseudozobellia_OTU#419               | 0 | 1 | 0 | 0 | 0 | 0 | 0 | 0 | 0 | 0  | 0 | 0 | 0 | 0 |
| unclassified Lachnospiraceae_OTU#420 | 0 | 1 | 0 | 0 | 0 | 0 | 3 | 0 | 0 | 0  | 0 | 0 | 0 | 0 |
| Allobaculum_OTU#421                  | 0 | 1 | 1 | 0 | 0 | 0 | 0 | 0 | 0 | 0  | 0 | 0 | 0 | 0 |
| Tannerella_OTU#422                   | 0 | 1 | 1 | 0 | 2 | 2 | 6 | 3 | 0 | 0  | 1 | 0 | 2 | 0 |
| Limibacter_OTU#423                   | 0 | 1 | 1 | 2 | 0 | 0 | 1 | 0 | 0 | 0  | 1 | 0 | 0 | 0 |
| Barnesiella_OTU#424                  | 0 | 1 | 0 | 0 | 0 | 0 | 0 | 0 | 0 | 0  | 0 | 0 | 0 | 0 |
| Paludibacter_OTU#425                 | 0 | 0 | 1 | 0 | 0 | 0 | 0 | 0 | 0 | 0  | 0 | 0 | 0 | 0 |
| Limibacter_OTU#426                   | 0 | 0 | 1 | 0 | 0 | 0 | 0 | 0 | 0 | 0  | 0 | 0 | 0 | 0 |
| Paludibacter_OTU#427                 | 0 | 0 | 1 | 1 | 0 | 1 | 0 | 0 | 0 | 0  | 0 | 0 | 0 | 0 |
| Barnesiella_OTU#428                  | 0 | 0 | 2 | 0 | 0 | 0 | 0 | 0 | 0 | 0  | 0 | 0 | 0 | 0 |
| unclassified Bacteroidales_OTU#429   | 0 | 0 | 1 | 0 | 1 | 0 | 0 | 2 | 0 | 0  | 0 | 0 | 0 | 0 |
| Anaerophaga_OTU#430                  | 0 | 0 | 1 | 0 | 0 | 0 | 0 | 0 | 0 | 0  | 0 | 0 | 0 | 0 |
| Rikenella_OTU#431                    | 0 | 0 | 1 | 0 | 0 | 0 | 0 | 0 | 0 | 0  | 0 | 0 | 0 | 0 |
| Paludibacter_OTU#432                 | 0 | 0 | 1 | 0 | 3 | 7 | 1 | 1 | 0 | 12 | 6 | 5 | 3 | 3 |
| Paludibacter_OTU#433                 | 0 | 0 | 1 | 0 | 0 | 0 | 0 | 0 | 0 | 0  | 0 | 0 | 0 | 1 |
| Limibacter_OTU#434                   | 0 | 0 | 1 | 0 | 0 | 0 | 0 | 0 | 0 | 0  | 0 | 0 | 0 | 0 |
| Barnesiella_OTU#435                  | 0 | 0 | 1 | 0 | 1 | 0 | 0 | 0 | 0 | 0  | 0 | 1 | 0 | 0 |
| Limibacter_OTU#436                   | 0 | 0 | 1 | 0 | 0 | 0 | 0 | 0 | 0 | 0  | 0 | 0 | 0 | 0 |
| Limibacter_OTU#437                   | 0 | 0 | 1 | 0 | 0 | 0 | 0 | 0 | 0 | 0  | 0 | 0 | 0 | 0 |
| Limibacter_OTU#438                   | 0 | 0 | 1 | 0 | 0 | 0 | 0 | 0 | 0 | 0  | 0 | 0 | 0 | 0 |
| Parasporobacterium_OTU#439           | 0 | 0 | 1 | 0 | 0 | 0 | 0 | 0 | 0 | 0  | 0 | 0 | 0 | 0 |
| Syntrophococcus_OTU#440              | 0 | 0 | 2 | 0 | 0 | 0 | 0 | 0 | 0 | 0  | 0 | 0 | 0 | 0 |

Supplementary Table 3

|                                    |   |   |   |   |   |   |   |   |   |   |   |   |   |   |
|------------------------------------|---|---|---|---|---|---|---|---|---|---|---|---|---|---|
| Barnesiella_OTU#441                | 0 | 0 | 1 | 0 | 0 | 0 | 0 | 0 | 0 | 0 | 0 | 0 | 0 | 0 |
| Anaerophaga_OTU#442                | 0 | 0 | 1 | 0 | 0 | 0 | 0 | 0 | 0 | 0 | 0 | 0 | 0 | 0 |
| Acetitomaculum_OTU#443             | 0 | 0 | 1 | 0 | 0 | 0 | 1 | 6 | 0 | 0 | 0 | 0 | 0 | 0 |
| Allobaculum_OTU#444                | 0 | 0 | 1 | 1 | 0 | 0 | 0 | 0 | 0 | 0 | 0 | 0 | 0 | 0 |
| Allobaculum_OTU#445                | 0 | 0 | 1 | 0 | 0 | 0 | 0 | 0 | 0 | 0 | 0 | 0 | 0 | 0 |
| Roseburia_OTU#446                  | 0 | 0 | 1 | 0 | 0 | 0 | 1 | 0 | 0 | 0 | 0 | 0 | 0 | 0 |
| Paludibacter_OTU#447               | 0 | 0 | 1 | 0 | 0 | 0 | 0 | 0 | 0 | 0 | 0 | 0 | 0 | 0 |
| Paludibacter_OTU#448               | 0 | 0 | 1 | 0 | 0 | 0 | 0 | 0 | 0 | 0 | 0 | 0 | 0 | 0 |
| Barnesiella_OTU#449                | 0 | 0 | 1 | 0 | 0 | 0 | 0 | 0 | 0 | 0 | 0 | 0 | 0 | 2 |
| Limibacter_OTU#450                 | 0 | 0 | 1 | 0 | 0 | 0 | 0 | 0 | 0 | 0 | 0 | 0 | 0 | 0 |
| Barnesiella_OTU#451                | 0 | 0 | 1 | 0 | 0 | 0 | 0 | 0 | 0 | 0 | 0 | 0 | 0 | 0 |
| Mucispirillum_OTU#452              | 0 | 0 | 1 | 0 | 0 | 0 | 0 | 0 | 0 | 0 | 0 | 0 | 0 | 0 |
| Limibacter_OTU#453                 | 0 | 0 | 1 | 0 | 0 | 1 | 0 | 1 | 0 | 1 | 1 | 0 | 0 | 1 |
| Paludibacter_OTU#454               | 0 | 0 | 1 | 0 | 0 | 0 | 0 | 0 | 0 | 0 | 0 | 0 | 1 | 0 |
| Paludibacter_OTU#455               | 0 | 0 | 1 | 0 | 0 | 0 | 0 | 0 | 0 | 0 | 0 | 0 | 0 | 0 |
| Barnesiella_OTU#456                | 0 | 0 | 1 | 0 | 0 | 0 | 0 | 0 | 0 | 0 | 0 | 0 | 0 | 0 |
| Anaerophaga_OTU#457                | 0 | 0 | 1 | 0 | 0 | 0 | 0 | 1 | 0 | 0 | 0 | 0 | 2 | 0 |
| Barnesiella_OTU#458                | 0 | 0 | 1 | 0 | 0 | 0 | 0 | 0 | 0 | 0 | 0 | 0 | 0 | 0 |
| Anaerophaga_OTU#459                | 0 | 0 | 1 | 0 | 0 | 0 | 0 | 0 | 0 | 0 | 0 | 0 | 0 | 0 |
| Paludibacter_OTU#460               | 0 | 0 | 1 | 0 | 0 | 0 | 0 | 0 | 0 | 0 | 0 | 0 | 0 | 0 |
| Limibacter_OTU#461                 | 0 | 0 | 1 | 0 | 0 | 0 | 0 | 0 | 0 | 0 | 0 | 0 | 0 | 0 |
| Paludibacter_OTU#462               | 0 | 0 | 1 | 0 | 0 | 1 | 0 | 1 | 0 | 0 | 1 | 0 | 0 | 1 |
| Limibacter_OTU#463                 | 0 | 0 | 1 | 0 | 0 | 0 | 0 | 0 | 0 | 0 | 0 | 0 | 0 | 0 |
| Paludibacter_OTU#464               | 0 | 0 | 1 | 1 | 0 | 0 | 0 | 0 | 0 | 0 | 0 | 0 | 0 | 0 |
| Tannerella_OTU#465                 | 0 | 0 | 1 | 0 | 0 | 0 | 0 | 0 | 0 | 0 | 0 | 0 | 0 | 0 |
| Paludibacter_OTU#466               | 0 | 0 | 1 | 0 | 0 | 0 | 0 | 0 | 0 | 0 | 0 | 0 | 0 | 0 |
| Anaerophaga_OTU#467                | 0 | 0 | 2 | 0 | 0 | 0 | 0 | 0 | 0 | 0 | 0 | 0 | 0 | 0 |
| Barnesiella_OTU#468                | 0 | 0 | 1 | 0 | 0 | 0 | 0 | 0 | 0 | 0 | 0 | 0 | 0 | 0 |
| unclassified Bacteroidetes_OTU#469 | 0 | 0 | 2 | 2 | 0 | 0 | 0 | 0 | 0 | 0 | 0 | 0 | 0 | 0 |
| Robinsoniella_OTU#470              | 0 | 0 | 1 | 0 | 0 | 1 | 0 | 0 | 0 | 0 | 0 | 0 | 0 | 0 |

Supplementary Table 3

|                                         |   |   |   |   |   |   |   |   |   |   |   |   |   |   |
|-----------------------------------------|---|---|---|---|---|---|---|---|---|---|---|---|---|---|
| Paludibacter_OTU#471                    | 0 | 0 | 1 | 0 | 0 | 0 | 0 | 0 | 0 | 0 | 0 | 0 | 1 | 0 |
| Barnesiella_OTU#472                     | 0 | 0 | 1 | 0 | 0 | 0 | 0 | 0 | 0 | 1 | 0 | 0 | 0 | 0 |
| Barnesiella_OTU#473                     | 0 | 0 | 1 | 0 | 0 | 0 | 0 | 0 | 0 | 0 | 0 | 0 | 0 | 0 |
| Barnesiella_OTU#474                     | 0 | 0 | 1 | 0 | 0 | 0 | 0 | 0 | 0 | 0 | 0 | 0 | 0 | 0 |
| Barnesiella_OTU#475                     | 0 | 0 | 1 | 0 | 0 | 0 | 0 | 0 | 0 | 0 | 0 | 0 | 0 | 0 |
| Limibacter_OTU#476                      | 0 | 0 | 1 | 0 | 0 | 0 | 0 | 0 | 0 | 0 | 0 | 0 | 0 | 0 |
| Limibacter_OTU#477                      | 0 | 0 | 1 | 0 | 0 | 0 | 0 | 0 | 0 | 0 | 0 | 0 | 0 | 0 |
| Allobaculum_OTU#478                     | 0 | 0 | 1 | 0 | 0 | 0 | 0 | 0 | 0 | 0 | 0 | 0 | 0 | 0 |
| Paludibacter_OTU#479                    | 0 | 0 | 1 | 0 | 0 | 0 | 0 | 0 | 0 | 0 | 0 | 1 | 0 | 0 |
| Rikenella_OTU#480                       | 0 | 0 | 1 | 0 | 0 | 0 | 0 | 0 | 0 | 0 | 0 | 0 | 0 | 0 |
| Limibacter_OTU#481                      | 0 | 0 | 1 | 0 | 0 | 0 | 0 | 0 | 0 | 0 | 0 | 0 | 0 | 0 |
| Paludibacter_OTU#482                    | 0 | 0 | 1 | 0 | 0 | 0 | 0 | 0 | 0 | 0 | 0 | 0 | 0 | 0 |
| Paludibacter_OTU#483                    | 0 | 0 | 1 | 0 | 0 | 0 | 0 | 0 | 0 | 0 | 0 | 0 | 0 | 0 |
| Paludibacter_OTU#484                    | 0 | 0 | 1 | 0 | 0 | 0 | 0 | 0 | 0 | 0 | 0 | 0 | 0 | 0 |
| Anaerophaga_OTU#485                     | 0 | 0 | 1 | 0 | 0 | 0 | 0 | 0 | 0 | 0 | 0 | 0 | 0 | 0 |
| Paludibacter_OTU#486                    | 0 | 0 | 1 | 0 | 0 | 0 | 0 | 1 | 0 | 1 | 2 | 0 | 0 | 0 |
| Paludibacter_OTU#487                    | 0 | 0 | 1 | 0 | 1 | 1 | 1 | 0 | 0 | 2 | 1 | 3 | 0 | 0 |
| Paludibacter_OTU#488                    | 0 | 0 | 1 | 1 | 0 | 0 | 0 | 0 | 0 | 0 | 0 | 0 | 0 | 0 |
| unclassified Porphyromonadaceae_OTU#489 | 0 | 0 | 1 | 1 | 0 | 1 | 0 | 0 | 0 | 0 | 0 | 0 | 0 | 1 |
| Syntrophococcus_OTU#490                 | 0 | 0 | 1 | 0 | 0 | 0 | 0 | 0 | 0 | 0 | 0 | 0 | 0 | 0 |
| Ruminococcus_OTU#491                    | 0 | 0 | 1 | 0 | 0 | 0 | 0 | 0 | 0 | 0 | 0 | 0 | 0 | 0 |
| Paludibacter_OTU#492                    | 0 | 0 | 1 | 0 | 0 | 0 | 0 | 0 | 0 | 0 | 0 | 0 | 0 | 0 |
| Rikenella_OTU#493                       | 0 | 0 | 1 | 0 | 0 | 0 | 0 | 0 | 0 | 0 | 0 | 0 | 0 | 0 |
| Rikenella_OTU#494                       | 0 | 0 | 1 | 0 | 0 | 0 | 0 | 0 | 0 | 0 | 0 | 0 | 0 | 0 |
| Paludibacter_OTU#495                    | 0 | 0 | 1 | 0 | 0 | 0 | 0 | 0 | 0 | 0 | 0 | 0 | 0 | 0 |
| Anaerophaga_OTU#496                     | 0 | 0 | 1 | 0 | 0 | 0 | 0 | 0 | 0 | 0 | 0 | 0 | 0 | 0 |
| Rikenella_OTU#497                       | 0 | 0 | 1 | 0 | 0 | 0 | 0 | 0 | 0 | 0 | 0 | 0 | 0 | 0 |
| Anaerovorax_OTU#498                     | 0 | 0 | 1 | 0 | 0 | 0 | 0 | 0 | 0 | 0 | 0 | 0 | 0 | 0 |
| Limibacter_OTU#499                      | 0 | 0 | 1 | 0 | 0 | 0 | 0 | 0 | 0 | 0 | 0 | 0 | 0 | 0 |
| Catenibacterium_OTU#500                 | 0 | 0 | 1 | 0 | 0 | 0 | 0 | 0 | 0 | 0 | 0 | 0 | 0 | 0 |

Supplementary Table 3

|                         |   |   |   |   |   |   |   |   |   |   |   |   |   |   |
|-------------------------|---|---|---|---|---|---|---|---|---|---|---|---|---|---|
| Paludibacter_OTU#501    | 0 | 0 | 1 | 0 | 0 | 0 | 0 | 0 | 0 | 0 | 0 | 0 | 0 | 0 |
| Paludibacter_OTU#502    | 0 | 0 | 1 | 0 | 1 | 0 | 0 | 0 | 0 | 0 | 0 | 0 | 0 | 0 |
| Rikenella_OTU#503       | 0 | 0 | 1 | 0 | 0 | 0 | 0 | 0 | 0 | 0 | 0 | 0 | 0 | 0 |
| Allobaculum_OTU#504     | 0 | 0 | 1 | 0 | 0 | 0 | 0 | 0 | 0 | 0 | 0 | 0 | 0 | 0 |
| Paludibacter_OTU#505    | 0 | 0 | 0 | 2 | 0 | 0 | 0 | 0 | 0 | 0 | 0 | 0 | 0 | 0 |
| Asaccharobacter_OTU#506 | 0 | 0 | 0 | 1 | 0 | 0 | 0 | 0 | 0 | 0 | 0 | 0 | 0 | 0 |
| Paludibacter_OTU#507    | 0 | 0 | 0 | 3 | 0 | 0 | 0 | 0 | 0 | 0 | 0 | 1 | 0 | 1 |
| Rikenella_OTU#508       | 0 | 0 | 0 | 1 | 0 | 0 | 0 | 0 | 0 | 0 | 0 | 0 | 0 | 0 |
| Allobaculum_OTU#509     | 0 | 0 | 0 | 1 | 0 | 0 | 0 | 0 | 0 | 0 | 0 | 0 | 0 | 0 |
| Paludibacter_OTU#510    | 0 | 0 | 0 | 1 | 2 | 1 | 1 | 0 | 0 | 1 | 0 | 2 | 1 | 0 |
| Paludibacter_OTU#511    | 0 | 0 | 0 | 1 | 0 | 0 | 1 | 0 | 0 | 0 | 0 | 0 | 0 | 0 |
| Limibacter_OTU#512      | 0 | 0 | 0 | 1 | 0 | 0 | 0 | 0 | 0 | 0 | 0 | 0 | 0 | 0 |
| Bradyrhizobium_OTU#513  | 0 | 0 | 0 | 1 | 0 | 0 | 0 | 0 | 0 | 0 | 0 | 0 | 0 | 0 |
| Paludibacter_OTU#514    | 0 | 0 | 0 | 1 | 0 | 0 | 0 | 0 | 0 | 1 | 0 | 0 | 0 | 0 |
| Paludibacter_OTU#515    | 0 | 0 | 0 | 1 | 0 | 0 | 0 | 0 | 0 | 0 | 0 | 0 | 0 | 0 |
| Rikenella_OTU#516       | 0 | 0 | 0 | 1 | 0 | 0 | 0 | 0 | 0 | 0 | 0 | 0 | 0 | 0 |
| Paludibacter_OTU#517    | 0 | 0 | 0 | 1 | 0 | 0 | 0 | 0 | 0 | 0 | 0 | 0 | 0 | 0 |
| Anaerophaga_OTU#518     | 0 | 0 | 0 | 1 | 0 | 0 | 0 | 0 | 0 | 0 | 0 | 0 | 0 | 0 |
| Limibacter_OTU#519      | 0 | 0 | 0 | 1 | 1 | 2 | 1 | 2 | 0 | 1 | 1 | 1 | 0 | 0 |
| Limibacter_OTU#520      | 0 | 0 | 0 | 1 | 0 | 0 | 0 | 0 | 0 | 0 | 0 | 0 | 0 | 0 |
| Paludibacter_OTU#521    | 0 | 0 | 0 | 1 | 0 | 0 | 0 | 0 | 0 | 0 | 0 | 0 | 0 | 0 |
| Paludibacter_OTU#522    | 0 | 0 | 0 | 1 | 0 | 0 | 0 | 0 | 0 | 0 | 0 | 0 | 0 | 0 |
| Allobaculum_OTU#523     | 0 | 0 | 0 | 1 | 0 | 0 | 0 | 0 | 0 | 0 | 0 | 0 | 0 | 0 |
| Paludibacter_OTU#524    | 0 | 0 | 0 | 2 | 0 | 0 | 0 | 0 | 0 | 0 | 1 | 1 | 0 | 1 |
| Rikenella_OTU#525       | 0 | 0 | 0 | 1 | 0 | 0 | 0 | 0 | 0 | 0 | 0 | 0 | 0 | 0 |
| Paludibacter_OTU#526    | 0 | 0 | 0 | 1 | 0 | 0 | 0 | 1 | 0 | 0 | 1 | 0 | 1 | 0 |
| Barnesiella_OTU#527     | 0 | 0 | 0 | 1 | 0 | 0 | 0 | 0 | 0 | 0 | 0 | 0 | 0 | 0 |
| Paludibacter_OTU#528    | 0 | 0 | 0 | 1 | 1 | 1 | 0 | 0 | 0 | 0 | 0 | 0 | 0 | 0 |
| Limibacter_OTU#529      | 0 | 0 | 0 | 1 | 0 | 0 | 0 | 0 | 0 | 0 | 0 | 0 | 0 | 0 |
| Limibacter_OTU#530      | 0 | 0 | 0 | 1 | 0 | 0 | 0 | 0 | 0 | 0 | 0 | 0 | 0 | 0 |

Supplementary Table 3

|                                    |   |   |   |   |   |   |   |   |   |   |   |   |   |   |
|------------------------------------|---|---|---|---|---|---|---|---|---|---|---|---|---|---|
| Tannerella_OTU#531                 | 0 | 0 | 0 | 1 | 0 | 0 | 0 | 0 | 0 | 0 | 0 | 0 | 0 | 0 |
| unclassified Bacteroidales_OTU#532 | 0 | 0 | 0 | 1 | 1 | 0 | 0 | 0 | 0 | 0 | 0 | 0 | 0 | 0 |
| Limibacter_OTU#533                 | 0 | 0 | 0 | 1 | 0 | 0 | 0 | 0 | 0 | 0 | 0 | 0 | 0 | 0 |
| Paludibacter_OTU#534               | 0 | 0 | 0 | 1 | 0 | 0 | 0 | 0 | 0 | 0 | 0 | 0 | 0 | 0 |
| Allobaculum_OTU#535                | 0 | 0 | 0 | 1 | 0 | 0 | 0 | 0 | 0 | 0 | 0 | 0 | 0 | 0 |
| Anaerophaga_OTU#536                | 0 | 0 | 0 | 1 | 0 | 0 | 0 | 0 | 0 | 0 | 0 | 0 | 0 | 0 |
| Salinhabitans_OTU#537              | 0 | 0 | 0 | 1 | 0 | 0 | 0 | 0 | 0 | 0 | 0 | 0 | 0 | 0 |
| Tannerella_OTU#538                 | 0 | 0 | 0 | 1 | 0 | 0 | 0 | 0 | 0 | 0 | 0 | 0 | 0 | 0 |
| Anaerophaga_OTU#539                | 0 | 0 | 0 | 1 | 0 | 0 | 0 | 0 | 0 | 0 | 0 | 0 | 0 | 0 |
| Limibacter_OTU#540                 | 0 | 0 | 0 | 1 | 0 | 0 | 0 | 0 | 0 | 0 | 0 | 0 | 0 | 0 |
| Anaerophaga_OTU#541                | 0 | 0 | 0 | 1 | 0 | 0 | 0 | 0 | 0 | 0 | 0 | 0 | 0 | 0 |
| Paludibacter_OTU#542               | 0 | 0 | 0 | 1 | 0 | 0 | 0 | 0 | 0 | 0 | 0 | 0 | 0 | 0 |
| Allobaculum_OTU#543                | 0 | 0 | 0 | 1 | 0 | 0 | 0 | 0 | 0 | 0 | 0 | 0 | 0 | 0 |
| Rikenella_OTU#544                  | 0 | 0 | 0 | 1 | 0 | 0 | 0 | 0 | 0 | 0 | 0 | 0 | 0 | 0 |
| Enterorhabdus_OTU#545              | 0 | 0 | 0 | 1 | 0 | 0 | 0 | 0 | 0 | 0 | 0 | 0 | 0 | 1 |
| Paludibacter_OTU#546               | 0 | 0 | 0 | 1 | 0 | 0 | 0 | 0 | 0 | 0 | 0 | 0 | 0 | 0 |
| Paludibacter_OTU#547               | 0 | 0 | 0 | 1 | 0 | 0 | 0 | 0 | 0 | 0 | 0 | 0 | 0 | 0 |
| Paludibacter_OTU#548               | 0 | 0 | 0 | 1 | 0 | 0 | 0 | 0 | 0 | 0 | 0 | 0 | 0 | 0 |
| Paludibacter_OTU#549               | 0 | 0 | 0 | 1 | 0 | 1 | 0 | 0 | 0 | 0 | 0 | 0 | 0 | 0 |
| Paludibacter_OTU#550               | 0 | 0 | 0 | 1 | 1 | 1 | 2 | 0 | 0 | 0 | 1 | 1 | 0 | 0 |
| Pseudozobellia_OTU#551             | 0 | 0 | 0 | 1 | 0 | 0 | 0 | 0 | 0 | 0 | 0 | 0 | 0 | 0 |
| Lachnobacterium_OTU#552            | 0 | 0 | 0 | 1 | 1 | 0 | 2 | 1 | 0 | 0 | 0 | 0 | 0 | 0 |
| Allobaculum_OTU#553                | 0 | 0 | 0 | 1 | 0 | 0 | 0 | 0 | 0 | 0 | 0 | 0 | 0 | 0 |
| Lachnobacterium_OTU#554            | 0 | 0 | 0 | 1 | 0 | 0 | 0 | 0 | 0 | 0 | 0 | 0 | 0 | 0 |
| Rikenella_OTU#555                  | 0 | 0 | 0 | 1 | 0 | 0 | 0 | 0 | 0 | 0 | 0 | 0 | 0 | 0 |
| Anaerophaga_OTU#556                | 0 | 0 | 0 | 1 | 0 | 0 | 0 | 0 | 0 | 0 | 0 | 0 | 0 | 0 |
| Rikenella_OTU#557                  | 0 | 0 | 0 | 1 | 0 | 0 | 0 | 1 | 0 | 0 | 0 | 0 | 0 | 1 |
| Barnesiella_OTU#558                | 0 | 0 | 0 | 1 | 0 | 0 | 0 | 0 | 0 | 0 | 0 | 0 | 0 | 0 |
| Anaerophaga_OTU#559                | 0 | 0 | 0 | 1 | 0 | 0 | 0 | 0 | 0 | 0 | 0 | 0 | 0 | 0 |
| Limibacter_OTU#560                 | 0 | 0 | 0 | 1 | 0 | 0 | 0 | 0 | 0 | 0 | 0 | 0 | 0 | 0 |

Supplementary Table 3



|                                    |   |   |   |   |   |   |   |   |   |   |   |   |   |   |
|------------------------------------|---|---|---|---|---|---|---|---|---|---|---|---|---|---|
| Paludibacter_OTU#561               | 0 | 0 | 0 | 1 | 1 | 0 | 0 | 0 | 0 | 0 | 0 | 0 | 0 | 0 |
| Anaerophaga_OTU#562                | 0 | 0 | 0 | 1 | 0 | 0 | 0 | 0 | 0 | 0 | 0 | 0 | 0 | 0 |
| Barnesiella_OTU#563                | 0 | 0 | 0 | 0 | 1 | 2 | 2 | 1 | 0 | 1 | 0 | 0 | 0 | 2 |
| Paludibacter_OTU#564               | 0 | 0 | 0 | 0 | 1 | 3 | 0 | 2 | 0 | 1 | 1 | 3 | 2 | 0 |
| Butyrivibrio_OTU#565               | 0 | 0 | 0 | 0 | 0 | 0 | 0 | 0 | 0 | 1 | 0 | 0 | 0 | 0 |
| Anaerophaga_OTU#566                | 0 | 0 | 0 | 0 | 0 | 0 | 0 | 1 | 0 | 1 | 1 | 1 | 0 | 0 |
| Paludibacter_OTU#567               | 0 | 0 | 0 | 0 | 0 | 2 | 0 | 0 | 0 | 2 | 0 | 0 | 0 | 2 |
| Paludibacter_OTU#568               | 0 | 0 | 0 | 0 | 0 | 0 | 0 | 0 | 0 | 1 | 0 | 0 | 0 | 0 |
| Rikenella_OTU#569                  | 0 | 0 | 0 | 0 | 0 | 0 | 0 | 0 | 0 | 1 | 0 | 0 | 0 | 0 |
| Oscillibacter_OTU#570              | 0 | 0 | 0 | 0 | 0 | 0 | 1 | 0 | 0 | 1 | 0 | 0 | 0 | 0 |
| Paludibacter_OTU#571               | 0 | 0 | 0 | 0 | 5 | 5 | 1 | 1 | 0 | 6 | 2 | 6 | 2 | 0 |
| Proteiniphilum_OTU#572             | 0 | 0 | 0 | 0 | 0 | 0 | 0 | 0 | 0 | 1 | 0 | 0 | 0 | 0 |
| Paludibacter_OTU#573               | 0 | 0 | 0 | 0 | 1 | 2 | 0 | 1 | 0 | 2 | 0 | 0 | 2 | 1 |
| Lachnobacterium_OTU#574            | 0 | 0 | 0 | 0 | 0 | 0 | 1 | 1 | 0 | 2 | 0 | 0 | 0 | 0 |
| Paludibacter_OTU#575               | 0 | 0 | 0 | 0 | 0 | 0 | 1 | 0 | 0 | 1 | 0 | 0 | 0 | 0 |
| Paludibacter_OTU#576               | 0 | 0 | 0 | 0 | 1 | 0 | 0 | 0 | 0 | 1 | 0 | 0 | 0 | 0 |
| Anaerophaga_OTU#577                | 0 | 0 | 0 | 0 | 0 | 0 | 0 | 0 | 0 | 3 | 0 | 1 | 5 | 1 |
| Parasutterella_OTU#578             | 0 | 0 | 0 | 0 | 0 | 0 | 0 | 0 | 0 | 1 | 0 | 0 | 0 | 0 |
| Bacteroides_OTU#579                | 0 | 0 | 0 | 0 | 0 | 2 | 0 | 0 | 0 | 1 | 0 | 2 | 0 | 0 |
| Coproccoccus_OTU#580               | 0 | 0 | 0 | 0 | 0 | 0 | 2 | 2 | 0 | 1 | 0 | 0 | 0 | 0 |
| Paludibacter_OTU#581               | 0 | 0 | 0 | 0 | 0 | 1 | 0 | 0 | 0 | 1 | 0 | 0 | 0 | 1 |
| Barnesiella_OTU#582                | 0 | 0 | 0 | 0 | 0 | 0 | 0 | 0 | 0 | 1 | 0 | 0 | 0 | 0 |
| unclassified Bacteroidales_OTU#583 | 0 | 0 | 0 | 0 | 0 | 0 | 0 | 0 | 0 | 1 | 0 | 0 | 0 | 1 |
| Paludibacter_OTU#584               | 0 | 0 | 0 | 0 | 0 | 0 | 0 | 1 | 0 | 1 | 1 | 0 | 0 | 0 |
| Paludibacter_OTU#585               | 0 | 0 | 0 | 0 | 0 | 0 | 0 | 0 | 0 | 1 | 0 | 0 | 0 | 0 |
| unclassified Bacteroidales_OTU#586 | 0 | 0 | 0 | 0 | 0 | 0 | 0 | 0 | 0 | 1 | 0 | 0 | 1 | 0 |
| Barnesiella_OTU#587                | 0 | 0 | 0 | 0 | 1 | 1 | 0 | 3 | 0 | 3 | 0 | 1 | 2 | 1 |
| Paludibacter_OTU#588               | 0 | 0 | 0 | 0 | 0 | 0 | 0 | 0 | 0 | 1 | 0 | 0 | 0 | 0 |
| unclassified TM7_OTU#589           | 0 | 0 | 0 | 0 | 2 | 0 | 1 | 1 | 0 | 2 | 1 | 3 | 0 | 1 |
| Lachnobacterium_OTU#590            | 0 | 0 | 0 | 0 | 0 | 0 | 3 | 0 | 0 | 2 | 0 | 0 | 0 | 0 |

Supplementary Table 3

|                                    |   |   |   |   |   |   |   |   |   |   |   |   |   |   |
|------------------------------------|---|---|---|---|---|---|---|---|---|---|---|---|---|---|
| Limibacter_OTU#591                 | 0 | 0 | 0 | 0 | 0 | 0 | 0 | 0 | 0 | 1 | 0 | 0 | 0 | 0 |
| Paludibacter_OTU#592               | 0 | 0 | 0 | 0 | 1 | 0 | 0 | 0 | 0 | 3 | 1 | 3 | 4 | 3 |
| unclassified Bacteroidales_OTU#593 | 0 | 0 | 0 | 0 | 0 | 1 | 0 | 0 | 0 | 1 | 0 | 0 | 0 | 0 |
| Alistipes_OTU#594                  | 0 | 0 | 0 | 0 | 0 | 0 | 0 | 0 | 0 | 1 | 0 | 0 | 0 | 0 |
| Barnesiella_OTU#595                | 0 | 0 | 0 | 0 | 2 | 4 | 0 | 4 | 0 | 2 | 2 | 7 | 3 | 1 |
| Paludibacter_OTU#596               | 0 | 0 | 0 | 0 | 0 | 0 | 1 | 2 | 0 | 3 | 1 | 2 | 0 | 1 |
| Paludibacter_OTU#597               | 0 | 0 | 0 | 0 | 0 | 1 | 0 | 0 | 0 | 1 | 2 | 2 | 0 | 0 |
| Paludibacter_OTU#598               | 0 | 0 | 0 | 0 | 0 | 1 | 1 | 0 | 0 | 7 | 1 | 3 | 5 | 3 |
| Barnesiella_OTU#599                | 0 | 0 | 0 | 0 | 0 | 0 | 0 | 0 | 0 | 1 | 0 | 0 | 0 | 0 |
| Paludibacter_OTU#600               | 0 | 0 | 0 | 0 | 0 | 1 | 0 | 0 | 0 | 1 | 0 | 1 | 0 | 0 |
| Marvinbryantia_OTU#601             | 0 | 0 | 0 | 0 | 0 | 0 | 0 | 0 | 0 | 1 | 0 | 0 | 0 | 0 |
| Paludibacter_OTU#602               | 0 | 0 | 0 | 0 | 1 | 0 | 1 | 0 | 0 | 1 | 2 | 2 | 1 | 0 |
| Barnesiella_OTU#603                | 0 | 0 | 0 | 0 | 0 | 0 | 0 | 0 | 0 | 1 | 0 | 0 | 1 | 0 |
| Paludibacter_OTU#604               | 0 | 0 | 0 | 0 | 0 | 2 | 0 | 0 | 0 | 2 | 1 | 2 | 2 | 5 |
| Anaerophaga_OTU#605                | 0 | 0 | 0 | 0 | 0 | 0 | 0 | 0 | 0 | 1 | 0 | 0 | 0 | 1 |
| Pseudozobellia_OTU#606             | 0 | 0 | 0 | 0 | 0 | 0 | 0 | 0 | 0 | 2 | 0 | 0 | 0 | 0 |
| Barnesiella_OTU#607                | 0 | 0 | 0 | 0 | 0 | 0 | 0 | 0 | 0 | 1 | 0 | 0 | 0 | 0 |
| Alistipes_OTU#608                  | 0 | 0 | 0 | 0 | 0 | 0 | 0 | 0 | 0 | 3 | 0 | 1 | 0 | 0 |
| Paludibacter_OTU#609               | 0 | 0 | 0 | 0 | 0 | 0 | 0 | 0 | 0 | 1 | 0 | 0 | 0 | 0 |
| Barnesiella_OTU#610                | 0 | 0 | 0 | 0 | 0 | 1 | 1 | 0 | 0 | 1 | 0 | 0 | 0 | 0 |
| Paludibacter_OTU#611               | 0 | 0 | 0 | 0 | 0 | 0 | 0 | 0 | 0 | 1 | 1 | 1 | 0 | 0 |
| Paludibacter_OTU#612               | 0 | 0 | 0 | 0 | 0 | 0 | 0 | 0 | 0 | 1 | 0 | 0 | 1 | 0 |
| Tannerella_OTU#613                 | 0 | 0 | 0 | 0 | 0 | 0 | 0 | 0 | 0 | 1 | 0 | 0 | 0 | 0 |
| Dorea_OTU#614                      | 0 | 0 | 0 | 0 | 0 | 0 | 0 | 1 | 0 | 2 | 0 | 0 | 0 | 0 |
| Lachnobacterium_OTU#615            | 0 | 0 | 0 | 0 | 0 | 0 | 0 | 0 | 0 | 1 | 0 | 0 | 0 | 0 |
| Barnesiella_OTU#616                | 0 | 0 | 0 | 0 | 0 | 1 | 0 | 0 | 0 | 1 | 1 | 0 | 0 | 0 |
| Anaerophaga_OTU#617                | 0 | 0 | 0 | 0 | 0 | 2 | 1 | 0 | 0 | 2 | 3 | 2 | 4 | 2 |
| Turcibacter_OTU#618                | 0 | 0 | 0 | 0 | 0 | 0 | 0 | 0 | 0 | 1 | 0 | 0 | 0 | 0 |
| Tannerella_OTU#619                 | 0 | 0 | 0 | 0 | 0 | 0 | 0 | 0 | 0 | 1 | 0 | 0 | 0 | 0 |
| Paludibacter_OTU#620               | 0 | 0 | 0 | 0 | 1 | 3 | 0 | 1 | 0 | 3 | 4 | 1 | 1 | 1 |

Supplementary Table 3

|                                    |   |   |   |   |   |   |   |   |   |   |   |   |   |   |
|------------------------------------|---|---|---|---|---|---|---|---|---|---|---|---|---|---|
| Anaerophaga_OTU#621                | 0 | 0 | 0 | 0 | 0 | 0 | 0 | 0 | 0 | 1 | 0 | 0 | 0 | 0 |
| Paludibacter_OTU#622               | 0 | 0 | 0 | 0 | 1 | 0 | 0 | 0 | 0 | 1 | 0 | 1 | 0 | 0 |
| Roseburia_OTU#623                  | 0 | 0 | 0 | 0 | 0 | 0 | 1 | 0 | 0 | 5 | 0 | 1 | 0 | 0 |
| Papillibacter_OTU#624              | 0 | 0 | 0 | 0 | 0 | 0 | 0 | 0 | 0 | 1 | 0 | 0 | 0 | 0 |
| Paludibacter_OTU#625               | 0 | 0 | 0 | 0 | 0 | 0 | 0 | 0 | 0 | 1 | 0 | 0 | 1 | 0 |
| Anaerophaga_OTU#626                | 0 | 0 | 0 | 0 | 0 | 0 | 1 | 1 | 0 | 1 | 0 | 0 | 0 | 0 |
| Anaerophaga_OTU#627                | 0 | 0 | 0 | 0 | 0 | 0 | 0 | 0 | 0 | 1 | 0 | 0 | 1 | 0 |
| Limibacter_OTU#628                 | 0 | 0 | 0 | 0 | 0 | 0 | 0 | 1 | 0 | 1 | 0 | 0 | 0 | 0 |
| Anaerophaga_OTU#629                | 0 | 0 | 0 | 0 | 0 | 0 | 0 | 0 | 0 | 1 | 0 | 0 | 0 | 0 |
| Barnesiella_OTU#630                | 0 | 0 | 0 | 0 | 0 | 0 | 0 | 0 | 0 | 1 | 0 | 0 | 0 | 0 |
| Butyricicoccus_OTU#631             | 0 | 0 | 0 | 0 | 0 | 0 | 0 | 0 | 0 | 1 | 0 | 0 | 0 | 0 |
| Robinsoniella_OTU#632              | 0 | 0 | 0 | 0 | 0 | 0 | 0 | 0 | 0 | 1 | 0 | 0 | 0 | 0 |
| Paludibacter_OTU#633               | 0 | 0 | 0 | 0 | 0 | 0 | 0 | 0 | 0 | 1 | 0 | 0 | 0 | 0 |
| Roseburia_OTU#634                  | 0 | 0 | 0 | 0 | 0 | 0 | 0 | 0 | 0 | 1 | 0 | 0 | 0 | 0 |
| Anaerophaga_OTU#635                | 0 | 0 | 0 | 0 | 0 | 0 | 0 | 0 | 0 | 1 | 0 | 0 | 0 | 0 |
| Tannerella_OTU#636                 | 0 | 0 | 0 | 0 | 0 | 0 | 0 | 0 | 0 | 1 | 0 | 0 | 0 | 0 |
| Barnesiella_OTU#637                | 0 | 0 | 0 | 0 | 0 | 0 | 0 | 0 | 0 | 1 | 0 | 0 | 0 | 0 |
| Lachnobacterium_OTU#638            | 0 | 0 | 0 | 0 | 0 | 0 | 0 | 0 | 0 | 1 | 0 | 0 | 0 | 0 |
| unclassified Bacteroidales_OTU#639 | 0 | 0 | 0 | 0 | 0 | 0 | 0 | 0 | 0 | 1 | 0 | 0 | 1 | 0 |
| Paludibacter_OTU#640               | 0 | 0 | 0 | 0 | 0 | 0 | 0 | 0 | 0 | 1 | 1 | 3 | 0 | 0 |
| Paludibacter_OTU#641               | 0 | 0 | 0 | 0 | 0 | 1 | 0 | 0 | 0 | 1 | 1 | 2 | 0 | 0 |
| Coprococcus_OTU#642                | 0 | 0 | 0 | 0 | 0 | 0 | 1 | 1 | 0 | 1 | 1 | 0 | 0 | 0 |
| Marvinbryantia_OTU#643             | 0 | 0 | 0 | 0 | 0 | 0 | 1 | 2 | 0 | 1 | 0 | 0 | 0 | 0 |
| Tannerella_OTU#644                 | 0 | 0 | 0 | 0 | 0 | 1 | 2 | 1 | 0 | 1 | 0 | 0 | 2 | 0 |
| Tannerella_OTU#645                 | 0 | 0 | 0 | 0 | 0 | 0 | 0 | 0 | 0 | 1 | 0 | 0 | 0 | 0 |
| Butyricicoccus_OTU#646             | 0 | 0 | 0 | 0 | 0 | 0 | 2 | 1 | 0 | 1 | 0 | 0 | 0 | 0 |
| Tannerella_OTU#647                 | 0 | 0 | 0 | 0 | 0 | 0 | 0 | 0 | 0 | 1 | 0 | 0 | 0 | 0 |
| Paludibacter_OTU#648               | 0 | 0 | 0 | 0 | 0 | 0 | 0 | 0 | 0 | 1 | 0 | 0 | 0 | 0 |
| Hallella_OTU#649                   | 0 | 0 | 0 | 0 | 0 | 0 | 0 | 0 | 0 | 1 | 0 | 0 | 0 | 0 |
| Lachnobacterium_OTU#650            | 0 | 0 | 0 | 0 | 0 | 0 | 0 | 0 | 0 | 1 | 0 | 0 | 0 | 0 |

Supplementary Table 3

|                         |   |   |   |   |   |   |   |   |   |   |   |   |   |   |
|-------------------------|---|---|---|---|---|---|---|---|---|---|---|---|---|---|
| Oscillibacter_OTU#651   | 0 | 0 | 0 | 0 | 0 | 0 | 0 | 0 | 0 | 1 | 0 | 0 | 0 | 0 |
| Barnesiella_OTU#652     | 0 | 0 | 0 | 0 | 0 | 0 | 0 | 0 | 0 | 1 | 0 | 0 | 0 | 0 |
| Paludibacter_OTU#653    | 0 | 0 | 0 | 0 | 0 | 0 | 0 | 0 | 0 | 1 | 2 | 0 | 0 | 0 |
| Paludibacter_OTU#654    | 0 | 0 | 0 | 0 | 0 | 0 | 0 | 0 | 0 | 1 | 0 | 0 | 0 | 0 |
| Paludibacter_OTU#655    | 0 | 0 | 0 | 0 | 0 | 0 | 0 | 0 | 0 | 1 | 0 | 0 | 0 | 0 |
| Anaerophaga_OTU#656     | 0 | 0 | 0 | 0 | 0 | 0 | 0 | 2 | 0 | 1 | 2 | 4 | 0 | 0 |
| Paludibacter_OTU#657    | 0 | 0 | 0 | 0 | 0 | 0 | 0 | 0 | 0 | 1 | 0 | 0 | 0 | 0 |
| Paludibacter_OTU#658    | 0 | 0 | 0 | 0 | 0 | 0 | 0 | 0 | 0 | 1 | 0 | 0 | 0 | 0 |
| Marvinbryantia_OTU#659  | 0 | 0 | 0 | 0 | 0 | 0 | 0 | 0 | 0 | 1 | 0 | 0 | 0 | 0 |
| Tannerella_OTU#660      | 0 | 0 | 0 | 0 | 0 | 0 | 0 | 0 | 0 | 1 | 0 | 0 | 0 | 0 |
| Paludibacter_OTU#661    | 0 | 0 | 0 | 0 | 0 | 0 | 1 | 0 | 0 | 1 | 0 | 0 | 0 | 0 |
| Lachnobacterium_OTU#662 | 0 | 0 | 0 | 0 | 0 | 0 | 1 | 0 | 0 | 1 | 0 | 0 | 0 | 0 |
| Paludibacter_OTU#663    | 0 | 0 | 0 | 0 | 0 | 0 | 0 | 0 | 0 | 1 | 0 | 0 | 0 | 1 |
| Paludibacter_OTU#664    | 0 | 0 | 0 | 0 | 0 | 0 | 0 | 0 | 0 | 1 | 0 | 0 | 0 | 0 |
| Alistipes_OTU#665       | 0 | 0 | 0 | 0 | 0 | 0 | 0 | 0 | 0 | 1 | 0 | 0 | 0 | 0 |
| Sporobacterium_OTU#666  | 0 | 0 | 0 | 0 | 0 | 0 | 0 | 0 | 0 | 1 | 0 | 0 | 0 | 0 |
| Barnesiella_OTU#667     | 0 | 0 | 0 | 0 | 0 | 0 | 0 | 0 | 0 | 1 | 0 | 0 | 0 | 0 |
| Tannerella_OTU#668      | 0 | 0 | 0 | 0 | 0 | 0 | 0 | 0 | 0 | 1 | 0 | 0 | 0 | 0 |
| Paludibacter_OTU#669    | 0 | 0 | 0 | 0 | 1 | 0 | 0 | 0 | 0 | 1 | 0 | 0 | 2 | 0 |
| Anaerophaga_OTU#670     | 0 | 0 | 0 | 0 | 0 | 0 | 0 | 0 | 0 | 1 | 0 | 0 | 0 | 0 |
| Blautia_OTU#671         | 0 | 0 | 0 | 0 | 0 | 0 | 0 | 0 | 0 | 1 | 0 | 0 | 0 | 0 |
| Paludibacter_OTU#672    | 0 | 0 | 0 | 0 | 0 | 0 | 0 | 0 | 0 | 1 | 0 | 0 | 0 | 0 |
| Barnesiella_OTU#673     | 0 | 0 | 0 | 0 | 0 | 0 | 0 | 0 | 0 | 1 | 0 | 0 | 0 | 0 |
| Paludibacter_OTU#674    | 0 | 0 | 0 | 0 | 0 | 0 | 0 | 0 | 0 | 1 | 0 | 0 | 2 | 0 |
| Barnesiella_OTU#675     | 0 | 0 | 0 | 0 | 0 | 0 | 0 | 0 | 0 | 0 | 1 | 0 | 0 | 0 |
| Brochothrix_OTU#676     | 0 | 0 | 0 | 0 | 0 | 0 | 0 | 0 | 0 | 0 | 1 | 0 | 0 | 0 |
| Paludibacter_OTU#677    | 0 | 0 | 0 | 0 | 2 | 2 | 0 | 0 | 0 | 0 | 2 | 1 | 0 | 0 |
| Paludibacter_OTU#678    | 0 | 0 | 0 | 0 | 0 | 0 | 0 | 0 | 0 | 0 | 2 | 3 | 0 | 0 |
| Paludibacter_OTU#679    | 0 | 0 | 0 | 0 | 0 | 0 | 0 | 0 | 0 | 0 | 1 | 0 | 0 | 0 |
| Paludibacter_OTU#680    | 0 | 0 | 0 | 0 | 0 | 0 | 0 | 1 | 0 | 0 | 2 | 0 | 0 | 1 |

Supplementary Table 3

|                                    |   |   |   |   |   |   |   |   |   |   |   |   |   |   |
|------------------------------------|---|---|---|---|---|---|---|---|---|---|---|---|---|---|
| Paludibacter_OTU#681               | 0 | 0 | 0 | 0 | 0 | 0 | 0 | 0 | 0 | 0 | 1 | 1 | 1 | 0 |
| Tannerella_OTU#682                 | 0 | 0 | 0 | 0 | 0 | 0 | 0 | 0 | 0 | 0 | 1 | 0 | 0 | 0 |
| Limibacter_OTU#683                 | 0 | 0 | 0 | 0 | 0 | 0 | 0 | 0 | 0 | 0 | 1 | 0 | 0 | 0 |
| Barnesiella_OTU#684                | 0 | 0 | 0 | 0 | 0 | 1 | 0 | 0 | 0 | 0 | 3 | 1 | 0 | 0 |
| Lactobacillus_OTU#685              | 0 | 0 | 0 | 0 | 0 | 0 | 0 | 0 | 0 | 0 | 3 | 1 | 0 | 0 |
| Tannerella_OTU#686                 | 0 | 0 | 0 | 0 | 0 | 0 | 0 | 0 | 0 | 0 | 1 | 0 | 0 | 0 |
| Anaerophaga_OTU#687                | 0 | 0 | 0 | 0 | 0 | 1 | 0 | 1 | 0 | 0 | 1 | 0 | 0 | 1 |
| unclassified Bacteroidales_OTU#688 | 0 | 0 | 0 | 0 | 0 | 0 | 0 | 0 | 0 | 0 | 2 | 0 | 0 | 0 |
| Paludibacter_OTU#689               | 0 | 0 | 0 | 0 | 0 | 0 | 0 | 0 | 0 | 0 | 1 | 0 | 0 | 0 |
| Paludibacter_OTU#690               | 0 | 0 | 0 | 0 | 0 | 0 | 0 | 0 | 0 | 0 | 1 | 0 | 0 | 0 |
| Papillibacter_OTU#691              | 0 | 0 | 0 | 0 | 0 | 0 | 0 | 0 | 0 | 0 | 2 | 0 | 0 | 1 |
| Tannerella_OTU#692                 | 0 | 0 | 0 | 0 | 0 | 0 | 0 | 0 | 0 | 0 | 1 | 1 | 1 | 0 |
| unclassified Clostridiales_OTU#693 | 0 | 0 | 0 | 0 | 0 | 1 | 0 | 0 | 0 | 0 | 1 | 0 | 0 | 0 |
| Paludibacter_OTU#694               | 0 | 0 | 0 | 0 | 0 | 0 | 0 | 0 | 0 | 0 | 1 | 0 | 0 | 0 |
| Paludibacter_OTU#695               | 0 | 0 | 0 | 0 | 0 | 0 | 0 | 0 | 0 | 0 | 1 | 0 | 0 | 0 |
| Paludibacter_OTU#696               | 0 | 0 | 0 | 0 | 0 | 0 | 0 | 0 | 0 | 0 | 1 | 0 | 0 | 1 |
| Turicibacter_OTU#697               | 0 | 0 | 0 | 0 | 0 | 0 | 0 | 0 | 0 | 0 | 1 | 0 | 0 | 0 |
| unclassified Bacteroidales_OTU#698 | 0 | 0 | 0 | 0 | 0 | 0 | 0 | 0 | 0 | 0 | 1 | 0 | 1 | 0 |
| Paludibacter_OTU#699               | 0 | 0 | 0 | 0 | 0 | 0 | 0 | 0 | 0 | 0 | 1 | 0 | 0 | 0 |
| Rikenella_OTU#700                  | 0 | 0 | 0 | 0 | 0 | 0 | 0 | 0 | 0 | 0 | 1 | 0 | 0 | 0 |
| Paludibacter_OTU#701               | 0 | 0 | 0 | 0 | 0 | 0 | 0 | 0 | 0 | 0 | 1 | 0 | 0 | 0 |
| Paludibacter_OTU#702               | 0 | 0 | 0 | 0 | 0 | 0 | 0 | 0 | 0 | 0 | 1 | 0 | 0 | 0 |
| Anaerophaga_OTU#703                | 0 | 0 | 0 | 0 | 0 | 0 | 0 | 0 | 0 | 0 | 1 | 0 | 0 | 0 |
| Anaerophaga_OTU#704                | 0 | 0 | 0 | 0 | 0 | 0 | 0 | 0 | 0 | 0 | 1 | 0 | 0 | 0 |
| Catenibacterium_OTU#705            | 0 | 0 | 0 | 0 | 0 | 0 | 0 | 0 | 0 | 0 | 1 | 1 | 0 | 0 |
| Paludibacter_OTU#706               | 0 | 0 | 0 | 0 | 0 | 0 | 0 | 0 | 0 | 0 | 1 | 0 | 0 | 0 |
| Paludibacter_OTU#707               | 0 | 0 | 0 | 0 | 0 | 0 | 1 | 0 | 0 | 0 | 1 | 0 | 0 | 1 |
| Tannerella_OTU#708                 | 0 | 0 | 0 | 0 | 0 | 0 | 0 | 0 | 0 | 0 | 1 | 0 | 0 | 0 |
| Tannerella_OTU#709                 | 0 | 0 | 0 | 0 | 0 | 0 | 0 | 0 | 0 | 0 | 1 | 0 | 0 | 0 |
| Paludibacter_OTU#710               | 0 | 0 | 0 | 0 | 1 | 0 | 0 | 0 | 0 | 0 | 1 | 0 | 0 | 0 |

Supplementary Table 3

|                                         |   |   |   |   |   |   |   |   |   |   |   |   |   |   |
|-----------------------------------------|---|---|---|---|---|---|---|---|---|---|---|---|---|---|
| Sharpea_OTU#711                         | 0 | 0 | 0 | 0 | 0 | 0 | 0 | 0 | 0 | 0 | 1 | 0 | 0 | 0 |
| Paludibacter_OTU#712                    | 0 | 0 | 0 | 0 | 0 | 0 | 0 | 0 | 0 | 0 | 1 | 0 | 0 | 0 |
| Paludibacter_OTU#713                    | 0 | 0 | 0 | 0 | 0 | 0 | 0 | 0 | 0 | 0 | 2 | 1 | 0 | 1 |
| Anaerophaga_OTU#714                     | 0 | 0 | 0 | 0 | 0 | 1 | 0 | 0 | 0 | 0 | 1 | 0 | 2 | 0 |
| unclassified Bacteroidetes_OTU#715      | 0 | 0 | 0 | 0 | 0 | 1 | 0 | 0 | 0 | 0 | 1 | 0 | 2 | 0 |
| Paludibacter_OTU#716                    | 0 | 0 | 0 | 0 | 0 | 0 | 0 | 0 | 0 | 0 | 1 | 0 | 0 | 0 |
| Paludibacter_OTU#717                    | 0 | 0 | 0 | 0 | 0 | 1 | 0 | 0 | 0 | 0 | 1 | 0 | 0 | 0 |
| Anaerophaga_OTU#718                     | 0 | 0 | 0 | 0 | 0 | 0 | 0 | 0 | 0 | 0 | 1 | 0 | 0 | 0 |
| Paludibacter_OTU#719                    | 0 | 0 | 0 | 0 | 0 | 3 | 0 | 0 | 0 | 0 | 1 | 1 | 0 | 0 |
| Tannerella_OTU#720                      | 0 | 0 | 0 | 0 | 0 | 0 | 0 | 0 | 0 | 0 | 1 | 0 | 0 | 0 |
| Anaerophaga_OTU#721                     | 0 | 0 | 0 | 0 | 1 | 0 | 0 | 0 | 0 | 0 | 1 | 0 | 1 | 0 |
| Paludibacter_OTU#722                    | 0 | 0 | 0 | 0 | 0 | 0 | 0 | 0 | 0 | 0 | 1 | 0 | 0 | 0 |
| Barnesiella_OTU#723                     | 0 | 0 | 0 | 0 | 0 | 0 | 0 | 0 | 0 | 0 | 1 | 0 | 0 | 0 |
| Tannerella_OTU#724                      | 0 | 0 | 0 | 0 | 1 | 0 | 0 | 1 | 0 | 0 | 1 | 0 | 0 | 0 |
| Anaerophaga_OTU#725                     | 0 | 0 | 0 | 0 | 0 | 0 | 0 | 0 | 0 | 0 | 1 | 0 | 0 | 0 |
| Paludibacter_OTU#726                    | 0 | 0 | 0 | 0 | 2 | 3 | 1 | 1 | 0 | 0 | 2 | 0 | 0 | 3 |
| Barnesiella_OTU#727                     | 0 | 0 | 0 | 0 | 0 | 0 | 0 | 0 | 0 | 0 | 1 | 0 | 0 | 0 |
| Anaerophaga_OTU#728                     | 0 | 0 | 0 | 0 | 0 | 0 | 0 | 0 | 0 | 0 | 1 | 0 | 0 | 0 |
| unclassified Porphyromonadaceae_OTU#729 | 0 | 0 | 0 | 0 | 0 | 0 | 0 | 0 | 0 | 0 | 1 | 2 | 0 | 1 |
| Rikenella_OTU#730                       | 0 | 0 | 0 | 0 | 0 | 0 | 0 | 0 | 0 | 0 | 1 | 0 | 1 | 0 |
| Anaerophaga_OTU#731                     | 0 | 0 | 0 | 0 | 0 | 0 | 0 | 0 | 0 | 0 | 1 | 0 | 0 | 0 |
| Paludibacter_OTU#732                    | 0 | 0 | 0 | 0 | 0 | 1 | 0 | 0 | 0 | 0 | 2 | 0 | 0 | 0 |
| unclassified Porphyromonadaceae_OTU#733 | 0 | 0 | 0 | 0 | 0 | 0 | 0 | 0 | 0 | 0 | 1 | 1 | 0 | 0 |
| Paludibacter_OTU#734                    | 0 | 0 | 0 | 0 | 0 | 0 | 0 | 0 | 0 | 0 | 1 | 0 | 0 | 0 |
| Anaerophaga_OTU#735                     | 0 | 0 | 0 | 0 | 0 | 0 | 0 | 0 | 0 | 0 | 1 | 0 | 0 | 0 |
| Paludibacter_OTU#736                    | 0 | 0 | 0 | 0 | 0 | 0 | 0 | 0 | 0 | 0 | 1 | 0 | 0 | 0 |
| Paludibacter_OTU#737                    | 0 | 0 | 0 | 0 | 0 | 0 | 0 | 0 | 0 | 0 | 0 | 1 | 0 | 0 |
| Paludibacter_OTU#738                    | 0 | 0 | 0 | 0 | 0 | 0 | 0 | 0 | 0 | 0 | 0 | 1 | 0 | 0 |
| Tannerella_OTU#739                      | 0 | 0 | 0 | 0 | 0 | 0 | 0 | 0 | 0 | 0 | 0 | 2 | 0 | 0 |
| Paludibacter_OTU#740                    | 0 | 0 | 0 | 0 | 1 | 0 | 0 | 0 | 0 | 0 | 0 | 2 | 0 | 0 |

Supplementary Table 3

|                         |   |   |   |   |   |   |   |   |   |   |   |   |   |   |
|-------------------------|---|---|---|---|---|---|---|---|---|---|---|---|---|---|
| Paludibacter_OTU#741    | 0 | 0 | 0 | 0 | 0 | 0 | 0 | 0 | 0 | 0 | 0 | 1 | 0 | 0 |
| Paludibacter_OTU#742    | 0 | 0 | 0 | 0 | 0 | 0 | 0 | 0 | 0 | 0 | 0 | 1 | 0 | 0 |
| Limibacter_OTU#743      | 0 | 0 | 0 | 0 | 0 | 0 | 0 | 0 | 0 | 0 | 0 | 1 | 0 | 0 |
| Paludibacter_OTU#744    | 0 | 0 | 0 | 0 | 1 | 0 | 0 | 0 | 0 | 0 | 0 | 1 | 1 | 0 |
| Tannerella_OTU#745      | 0 | 0 | 0 | 0 | 2 | 1 | 0 | 1 | 0 | 0 | 0 | 2 | 1 | 0 |
| Paludibacter_OTU#746    | 0 | 0 | 0 | 0 | 0 | 0 | 0 | 0 | 0 | 0 | 0 | 1 | 0 | 0 |
| Paludibacter_OTU#747    | 0 | 0 | 0 | 0 | 0 | 0 | 0 | 0 | 0 | 0 | 0 | 1 | 0 | 0 |
| Anaerophaga_OTU#748     | 0 | 0 | 0 | 0 | 0 | 0 | 0 | 0 | 0 | 0 | 0 | 1 | 0 | 0 |
| Parabacteroides_OTU#749 | 0 | 0 | 0 | 0 | 0 | 0 | 0 | 0 | 0 | 0 | 0 | 1 | 0 | 0 |
| Tannerella_OTU#750      | 0 | 0 | 0 | 0 | 0 | 0 | 0 | 0 | 0 | 0 | 0 | 1 | 0 | 0 |
| Rikenella_OTU#751       | 0 | 0 | 0 | 0 | 0 | 0 | 0 | 0 | 0 | 0 | 0 | 1 | 0 | 0 |
| Paludibacter_OTU#752    | 0 | 0 | 0 | 0 | 0 | 0 | 0 | 0 | 0 | 0 | 0 | 1 | 0 | 0 |
| Paludibacter_OTU#753    | 0 | 0 | 0 | 0 | 0 | 0 | 0 | 0 | 0 | 0 | 0 | 1 | 0 | 0 |
| Aminiphilus_OTU#754     | 0 | 0 | 0 | 0 | 0 | 0 | 0 | 0 | 0 | 0 | 0 | 1 | 0 | 0 |
| Dorea_OTU#755           | 0 | 0 | 0 | 0 | 0 | 0 | 1 | 1 | 0 | 0 | 0 | 1 | 0 | 0 |
| Tannerella_OTU#756      | 0 | 0 | 0 | 0 | 0 | 0 | 1 | 0 | 0 | 0 | 0 | 1 | 1 | 0 |
| Paludibacter_OTU#757    | 0 | 0 | 0 | 0 | 0 | 0 | 0 | 0 | 0 | 0 | 0 | 2 | 0 | 0 |
| Paludibacter_OTU#758    | 0 | 0 | 0 | 0 | 0 | 0 | 0 | 0 | 0 | 0 | 0 | 1 | 0 | 0 |
| Paludibacter_OTU#759    | 0 | 0 | 0 | 0 | 0 | 0 | 0 | 0 | 0 | 0 | 0 | 1 | 0 | 0 |
| Barnesiella_OTU#760     | 0 | 0 | 0 | 0 | 0 | 0 | 0 | 0 | 0 | 0 | 0 | 1 | 0 | 0 |
| Paludibacter_OTU#761    | 0 | 0 | 0 | 0 | 0 | 0 | 0 | 0 | 0 | 0 | 0 | 1 | 0 | 0 |
| Barnesiella_OTU#762     | 0 | 0 | 0 | 0 | 0 | 0 | 0 | 0 | 0 | 0 | 0 | 1 | 0 | 0 |
| Paludibacter_OTU#763    | 0 | 0 | 0 | 0 | 0 | 0 | 0 | 0 | 0 | 0 | 0 | 1 | 0 | 0 |
| Paludibacter_OTU#764    | 0 | 0 | 0 | 0 | 1 | 0 | 0 | 0 | 0 | 0 | 0 | 1 | 0 | 0 |
| Paludibacter_OTU#765    | 0 | 0 | 0 | 0 | 0 | 0 | 0 | 0 | 0 | 0 | 0 | 1 | 0 | 0 |
| Barnesiella_OTU#766     | 0 | 0 | 0 | 0 | 0 | 0 | 0 | 0 | 0 | 0 | 0 | 1 | 0 | 0 |
| Paludibacter_OTU#767    | 0 | 0 | 0 | 0 | 0 | 0 | 0 | 0 | 0 | 0 | 0 | 1 | 0 | 0 |
| Limibacter_OTU#768      | 0 | 0 | 0 | 0 | 0 | 0 | 0 | 0 | 0 | 0 | 0 | 1 | 0 | 0 |
| Paludibacter_OTU#769    | 0 | 0 | 0 | 0 | 0 | 0 | 0 | 1 | 0 | 0 | 0 | 1 | 0 | 1 |
| Rikenella_OTU#770       | 0 | 0 | 0 | 0 | 0 | 0 | 0 | 0 | 0 | 0 | 0 | 1 | 0 | 0 |

Supplementary Table 3

|                        |   |   |   |   |   |   |   |   |   |   |   |   |   |   |
|------------------------|---|---|---|---|---|---|---|---|---|---|---|---|---|---|
| Barnesiella_OTU#771    | 0 | 0 | 0 | 0 | 0 | 1 | 0 | 0 | 0 | 0 | 0 | 1 | 0 | 0 |
| Paludibacter_OTU#772   | 0 | 0 | 0 | 0 | 0 | 0 | 0 | 0 | 0 | 0 | 0 | 1 | 0 | 1 |
| Paludibacter_OTU#773   | 0 | 0 | 0 | 0 | 0 | 0 | 0 | 1 | 0 | 0 | 0 | 1 | 0 | 0 |
| Anaerophaga_OTU#774    | 0 | 0 | 0 | 0 | 0 | 0 | 0 | 0 | 0 | 0 | 0 | 1 | 0 | 0 |
| Paludibacter_OTU#775   | 0 | 0 | 0 | 0 | 0 | 1 | 0 | 0 | 0 | 0 | 0 | 1 | 0 | 0 |
| Barnesiella_OTU#776    | 0 | 0 | 0 | 0 | 0 | 1 | 0 | 0 | 0 | 0 | 0 | 1 | 0 | 0 |
| Limibacter_OTU#777     | 0 | 0 | 0 | 0 | 0 | 0 | 0 | 0 | 0 | 0 | 0 | 1 | 0 | 0 |
| Hallella_OTU#778       | 0 | 0 | 0 | 0 | 0 | 0 | 0 | 0 | 0 | 0 | 0 | 1 | 0 | 0 |
| Rikenella_OTU#779      | 0 | 0 | 0 | 0 | 0 | 0 | 0 | 0 | 0 | 0 | 0 | 1 | 0 | 0 |
| Paludibacter_OTU#780   | 0 | 0 | 0 | 0 | 0 | 0 | 0 | 0 | 0 | 0 | 0 | 1 | 0 | 0 |
| Paludibacter_OTU#781   | 0 | 0 | 0 | 0 | 0 | 0 | 0 | 0 | 0 | 0 | 0 | 1 | 0 | 0 |
| Barnesiella_OTU#782    | 0 | 0 | 0 | 0 | 0 | 0 | 0 | 0 | 0 | 0 | 0 | 1 | 0 | 0 |
| Paludibacter_OTU#783   | 0 | 0 | 0 | 0 | 0 | 0 | 0 | 0 | 0 | 0 | 0 | 1 | 0 | 0 |
| Tannerella_OTU#784     | 0 | 0 | 0 | 0 | 1 | 0 | 0 | 1 | 0 | 0 | 0 | 1 | 0 | 0 |
| Paludibacter_OTU#785   | 0 | 0 | 0 | 0 | 0 | 0 | 0 | 0 | 0 | 0 | 0 | 1 | 0 | 0 |
| Paludibacter_OTU#786   | 0 | 0 | 0 | 0 | 0 | 1 | 0 | 0 | 0 | 0 | 0 | 1 | 0 | 0 |
| Lactobacillus_OTU#787  | 0 | 0 | 0 | 0 | 0 | 0 | 0 | 0 | 0 | 0 | 0 | 1 | 0 | 0 |
| Paludibacter_OTU#788   | 0 | 0 | 0 | 0 | 1 | 0 | 0 | 1 | 0 | 0 | 0 | 1 | 0 | 0 |
| Paludibacter_OTU#789   | 0 | 0 | 0 | 0 | 0 | 0 | 0 | 0 | 0 | 0 | 0 | 1 | 0 | 0 |
| Anaerophaga_OTU#790    | 0 | 0 | 0 | 0 | 0 | 0 | 0 | 0 | 0 | 0 | 0 | 1 | 0 | 0 |
| Paludibacter_OTU#791   | 0 | 0 | 0 | 0 | 0 | 0 | 0 | 0 | 0 | 0 | 0 | 1 | 0 | 0 |
| Tannerella_OTU#792     | 0 | 0 | 0 | 0 | 0 | 0 | 0 | 0 | 0 | 0 | 0 | 1 | 0 | 0 |
| Marvinbryantia_OTU#793 | 0 | 0 | 0 | 0 | 0 | 0 | 0 | 0 | 0 | 0 | 0 | 1 | 0 | 0 |
| Barnesiella_OTU#794    | 0 | 0 | 0 | 0 | 0 | 0 | 0 | 0 | 0 | 0 | 0 | 1 | 0 | 0 |
| Paludibacter_OTU#795   | 0 | 0 | 0 | 0 | 0 | 0 | 0 | 0 | 0 | 0 | 0 | 1 | 0 | 0 |
| Paludibacter_OTU#796   | 0 | 0 | 0 | 0 | 0 | 0 | 0 | 0 | 0 | 0 | 0 | 1 | 0 | 0 |
| Paludibacter_OTU#797   | 0 | 0 | 0 | 0 | 0 | 0 | 0 | 0 | 0 | 0 | 0 | 1 | 0 | 0 |
| Paludibacter_OTU#798   | 0 | 0 | 0 | 0 | 0 | 0 | 0 | 0 | 0 | 0 | 0 | 1 | 0 | 0 |
| Pseudozobellia_OTU#799 | 0 | 0 | 0 | 0 | 1 | 0 | 0 | 0 | 0 | 0 | 0 | 1 | 0 | 0 |
| Paludibacter_OTU#800   | 0 | 0 | 0 | 0 | 0 | 0 | 0 | 0 | 0 | 0 | 0 | 1 | 0 | 0 |

Supplementary Table 3



|                                         |   |   |   |   |   |   |   |   |   |   |   |   |   |   |
|-----------------------------------------|---|---|---|---|---|---|---|---|---|---|---|---|---|---|
| Barnesiella_OTU#801                     | 0 | 0 | 0 | 0 | 0 | 0 | 0 | 0 | 0 | 0 | 0 | 1 | 0 | 0 |
| Paludibacter_OTU#802                    | 0 | 0 | 0 | 0 | 0 | 0 | 0 | 0 | 0 | 0 | 0 | 1 | 0 | 0 |
| Anaerophaga_OTU#803                     | 0 | 0 | 0 | 0 | 0 | 0 | 0 | 0 | 0 | 0 | 0 | 1 | 0 | 0 |
| Barnesiella_OTU#804                     | 0 | 0 | 0 | 0 | 0 | 0 | 0 | 0 | 0 | 0 | 0 | 0 | 1 | 0 |
| Barnesiella_OTU#805                     | 0 | 0 | 0 | 0 | 0 | 0 | 0 | 0 | 0 | 0 | 0 | 0 | 1 | 0 |
| Barnesiella_OTU#806                     | 0 | 0 | 0 | 0 | 0 | 0 | 0 | 0 | 0 | 0 | 0 | 0 | 1 | 0 |
| Paludibacter_OTU#807                    | 0 | 0 | 0 | 0 | 0 | 0 | 0 | 0 | 0 | 0 | 0 | 0 | 1 | 0 |
| Anaerostipes_OTU#808                    | 0 | 0 | 0 | 0 | 0 | 0 | 0 | 0 | 0 | 0 | 0 | 0 | 2 | 0 |
| Limibacter_OTU#809                      | 0 | 0 | 0 | 0 | 0 | 1 | 0 | 0 | 0 | 0 | 0 | 0 | 1 | 2 |
| Barnesiella_OTU#810                     | 0 | 0 | 0 | 0 | 0 | 0 | 0 | 1 | 0 | 0 | 0 | 0 | 1 | 0 |
| Anaerophaga_OTU#811                     | 0 | 0 | 0 | 0 | 0 | 0 | 0 | 0 | 0 | 0 | 0 | 0 | 1 | 0 |
| Anaerophaga_OTU#812                     | 0 | 0 | 0 | 0 | 0 | 0 | 0 | 0 | 0 | 0 | 0 | 0 | 1 | 0 |
| unclassified Bacteroidales_OTU#813      | 0 | 0 | 0 | 0 | 0 | 0 | 0 | 0 | 0 | 0 | 0 | 0 | 5 | 1 |
| Paludibacter_OTU#814                    | 0 | 0 | 0 | 0 | 0 | 0 | 0 | 1 | 0 | 0 | 0 | 0 | 1 | 0 |
| Paludibacter_OTU#815                    | 0 | 0 | 0 | 0 | 0 | 0 | 0 | 0 | 0 | 0 | 0 | 0 | 1 | 0 |
| Paludibacter_OTU#816                    | 0 | 0 | 0 | 0 | 0 | 0 | 0 | 0 | 0 | 0 | 0 | 0 | 4 | 0 |
| Paludibacter_OTU#817                    | 0 | 0 | 0 | 0 | 0 | 0 | 0 | 0 | 0 | 0 | 0 | 0 | 1 | 0 |
| Anaerophaga_OTU#818                     | 0 | 0 | 0 | 0 | 0 | 0 | 0 | 0 | 0 | 0 | 0 | 0 | 1 | 0 |
| Anaerophaga_OTU#819                     | 0 | 0 | 0 | 0 | 0 | 0 | 0 | 0 | 0 | 0 | 0 | 0 | 1 | 0 |
| Paludibacter_OTU#820                    | 0 | 0 | 0 | 0 | 0 | 0 | 0 | 0 | 0 | 0 | 0 | 0 | 1 | 0 |
| Paludibacter_OTU#821                    | 0 | 0 | 0 | 0 | 1 | 0 | 0 | 0 | 0 | 0 | 0 | 0 | 2 | 0 |
| Paludibacter_OTU#822                    | 0 | 0 | 0 | 0 | 0 | 0 | 0 | 0 | 0 | 0 | 0 | 0 | 1 | 0 |
| Paludibacter_OTU#823                    | 0 | 0 | 0 | 0 | 0 | 1 | 0 | 0 | 0 | 0 | 0 | 0 | 1 | 0 |
| Paludibacter_OTU#824                    | 0 | 0 | 0 | 0 | 0 | 0 | 0 | 0 | 0 | 0 | 0 | 0 | 3 | 0 |
| Limibacter_OTU#825                      | 0 | 0 | 0 | 0 | 0 | 0 | 0 | 0 | 0 | 0 | 0 | 0 | 1 | 0 |
| Paludibacter_OTU#826                    | 0 | 0 | 0 | 0 | 1 | 0 | 1 | 0 | 0 | 0 | 0 | 0 | 2 | 0 |
| Paludibacter_OTU#827                    | 0 | 0 | 0 | 0 | 0 | 0 | 0 | 0 | 0 | 0 | 0 | 0 | 1 | 0 |
| Paludibacter_OTU#828                    | 0 | 0 | 0 | 0 | 0 | 0 | 0 | 0 | 0 | 0 | 0 | 0 | 2 | 1 |
| Paludibacter_OTU#829                    | 0 | 0 | 0 | 0 | 0 | 0 | 0 | 0 | 0 | 0 | 0 | 0 | 1 | 0 |
| unclassified Porphyromonadaceae_OTU#830 | 0 | 0 | 0 | 0 | 0 | 0 | 0 | 0 | 0 | 0 | 0 | 0 | 1 | 1 |

Supplementary Table 3

|                                         |   |   |   |   |   |   |   |   |   |   |   |   |   |   |
|-----------------------------------------|---|---|---|---|---|---|---|---|---|---|---|---|---|---|
| Paludibacter_OTU#831                    | 0 | 0 | 0 | 0 | 0 | 0 | 0 | 0 | 0 | 0 | 0 | 0 | 1 | 0 |
| Barnesiella_OTU#832                     | 0 | 0 | 0 | 0 | 0 | 0 | 0 | 0 | 0 | 0 | 0 | 0 | 1 | 0 |
| Paludibacter_OTU#833                    | 0 | 0 | 0 | 0 | 0 | 0 | 0 | 0 | 0 | 0 | 0 | 0 | 1 | 0 |
| Rikenella_OTU#834                       | 0 | 0 | 0 | 0 | 0 | 0 | 0 | 0 | 0 | 0 | 0 | 0 | 1 | 0 |
| Paludibacter_OTU#835                    | 0 | 0 | 0 | 0 | 0 | 0 | 0 | 0 | 0 | 0 | 0 | 0 | 1 | 0 |
| Paludibacter_OTU#836                    | 0 | 0 | 0 | 0 | 0 | 0 | 1 | 0 | 0 | 0 | 0 | 0 | 1 | 0 |
| unclassified Porphyromonadaceae_OTU#837 | 0 | 0 | 0 | 0 | 1 | 1 | 1 | 0 | 0 | 0 | 0 | 0 | 1 | 0 |
| Paludibacter_OTU#838                    | 0 | 0 | 0 | 0 | 0 | 0 | 0 | 0 | 0 | 0 | 0 | 0 | 1 | 0 |
| Paludibacter_OTU#839                    | 0 | 0 | 0 | 0 | 0 | 0 | 0 | 0 | 0 | 0 | 0 | 0 | 1 | 0 |
| Anaerophaga_OTU#840                     | 0 | 0 | 0 | 0 | 0 | 0 | 0 | 0 | 0 | 0 | 0 | 0 | 1 | 0 |
| Paludibacter_OTU#841                    | 0 | 0 | 0 | 0 | 0 | 0 | 0 | 0 | 0 | 0 | 0 | 0 | 1 | 0 |
| Anaerophaga_OTU#842                     | 0 | 0 | 0 | 0 | 0 | 0 | 0 | 0 | 0 | 0 | 0 | 0 | 1 | 0 |
| Anaerophaga_OTU#843                     | 0 | 0 | 0 | 0 | 0 | 0 | 0 | 0 | 0 | 0 | 0 | 0 | 1 | 0 |
| Barnesiella_OTU#844                     | 0 | 0 | 0 | 0 | 0 | 0 | 0 | 0 | 0 | 0 | 0 | 0 | 1 | 0 |
| Rikenella_OTU#845                       | 0 | 0 | 0 | 0 | 0 | 0 | 0 | 0 | 0 | 0 | 0 | 0 | 1 | 0 |
| Paludibacter_OTU#846                    | 0 | 0 | 0 | 0 | 2 | 0 | 0 | 0 | 0 | 0 | 0 | 0 | 1 | 0 |
| Anaerophaga_OTU#847                     | 0 | 0 | 0 | 0 | 0 | 0 | 0 | 0 | 0 | 0 | 0 | 0 | 1 | 0 |
| Paludibacter_OTU#848                    | 0 | 0 | 0 | 0 | 0 | 0 | 0 | 0 | 0 | 0 | 0 | 0 | 1 | 0 |
| Tannerella_OTU#849                      | 0 | 0 | 0 | 0 | 0 | 0 | 0 | 0 | 0 | 0 | 0 | 0 | 1 | 0 |
| Limibacter_OTU#850                      | 0 | 0 | 0 | 0 | 0 | 0 | 0 | 0 | 0 | 0 | 0 | 0 | 1 | 0 |
| Paludibacter_OTU#851                    | 0 | 0 | 0 | 0 | 0 | 0 | 0 | 0 | 0 | 0 | 0 | 0 | 1 | 0 |
| Limibacter_OTU#852                      | 0 | 0 | 0 | 0 | 0 | 0 | 0 | 0 | 0 | 0 | 0 | 0 | 1 | 0 |
| Adlercreutzia_OTU#853                   | 0 | 0 | 0 | 0 | 0 | 0 | 0 | 0 | 0 | 0 | 0 | 0 | 1 | 0 |
| Dorea_OTU#854                           | 0 | 0 | 0 | 0 | 0 | 0 | 0 | 0 | 0 | 0 | 0 | 0 | 1 | 0 |
| Paludibacter_OTU#855                    | 0 | 0 | 0 | 0 | 0 | 0 | 0 | 0 | 0 | 0 | 0 | 0 | 0 | 2 |
| Barnesiella_OTU#856                     | 0 | 0 | 0 | 0 | 0 | 0 | 0 | 0 | 0 | 0 | 0 | 0 | 0 | 1 |
| Paludibacter_OTU#857                    | 0 | 0 | 0 | 0 | 0 | 0 | 0 | 0 | 0 | 0 | 0 | 0 | 0 | 1 |
| Barnesiella_OTU#858                     | 0 | 0 | 0 | 0 | 0 | 0 | 0 | 0 | 0 | 0 | 0 | 0 | 0 | 1 |
| Robinsoniella_OTU#859                   | 0 | 0 | 0 | 0 | 0 | 0 | 3 | 1 | 0 | 0 | 0 | 0 | 0 | 1 |
| Barnesiella_OTU#860                     | 0 | 0 | 0 | 0 | 1 | 0 | 0 | 0 | 0 | 0 | 0 | 0 | 0 | 1 |

Supplementary Table 3

|                                 |   |   |   |   |   |   |   |   |   |   |   |   |   |   |
|---------------------------------|---|---|---|---|---|---|---|---|---|---|---|---|---|---|
| Paludibacter_OTU#861            | 0 | 0 | 0 | 0 | 0 | 0 | 0 | 0 | 0 | 0 | 0 | 0 | 0 | 1 |
| Paludibacter_OTU#862            | 0 | 0 | 0 | 0 | 0 | 0 | 0 | 0 | 0 | 0 | 0 | 0 | 0 | 1 |
| Aquiflexum_OTU#863              | 0 | 0 | 0 | 0 | 0 | 0 | 0 | 0 | 0 | 0 | 0 | 0 | 0 | 1 |
| Enterorhabdus_OTU#864           | 0 | 0 | 0 | 0 | 1 | 0 | 0 | 1 | 0 | 0 | 0 | 0 | 0 | 1 |
| Paludibacter_OTU#865            | 0 | 0 | 0 | 0 | 0 | 0 | 0 | 0 | 0 | 0 | 0 | 0 | 0 | 1 |
| Paludibacter_OTU#866            | 0 | 0 | 0 | 0 | 0 | 0 | 1 | 1 | 0 | 0 | 0 | 0 | 0 | 2 |
| Paludibacter_OTU#867            | 0 | 0 | 0 | 0 | 0 | 0 | 0 | 0 | 0 | 0 | 0 | 0 | 0 | 1 |
| Asaccharobacter_OTU#868         | 0 | 0 | 0 | 0 | 0 | 0 | 0 | 2 | 0 | 0 | 0 | 0 | 0 | 1 |
| Lactobacillus_OTU#869           | 0 | 0 | 0 | 0 | 0 | 0 | 0 | 0 | 0 | 0 | 0 | 0 | 0 | 1 |
| Barnesiella_OTU#870             | 0 | 0 | 0 | 0 | 0 | 0 | 0 | 0 | 0 | 0 | 0 | 0 | 0 | 1 |
| unclassified Firmicutes_OTU#871 | 0 | 0 | 0 | 0 | 0 | 1 | 0 | 0 | 0 | 0 | 0 | 0 | 0 | 1 |
| Barnesiella_OTU#872             | 0 | 0 | 0 | 0 | 0 | 0 | 0 | 0 | 0 | 0 | 0 | 0 | 0 | 1 |
| Rikenella_OTU#873               | 0 | 0 | 0 | 0 | 0 | 0 | 0 | 0 | 0 | 0 | 0 | 0 | 0 | 1 |
| Paludibacter_OTU#874            | 0 | 0 | 0 | 0 | 0 | 0 | 0 | 0 | 0 | 0 | 0 | 0 | 0 | 1 |
| Paludibacter_OTU#875            | 0 | 0 | 0 | 0 | 0 | 0 | 0 | 0 | 0 | 0 | 0 | 0 | 0 | 1 |
| Limibacter_OTU#876              | 0 | 0 | 0 | 0 | 0 | 0 | 0 | 0 | 0 | 0 | 0 | 0 | 0 | 1 |
| Paludibacter_OTU#877            | 0 | 0 | 0 | 0 | 0 | 0 | 0 | 0 | 0 | 0 | 0 | 0 | 0 | 1 |
| Barnesiella_OTU#878             | 0 | 0 | 0 | 0 | 0 | 0 | 0 | 0 | 0 | 0 | 0 | 0 | 0 | 1 |
| Limibacter_OTU#879              | 0 | 0 | 0 | 0 | 0 | 0 | 0 | 0 | 0 | 0 | 0 | 0 | 0 | 1 |
| Paludibacter_OTU#880            | 0 | 0 | 0 | 0 | 0 | 0 | 1 | 0 | 0 | 0 | 0 | 0 | 0 | 1 |
| Anaerophaga_OTU#881             | 0 | 0 | 0 | 0 | 0 | 1 | 0 | 0 | 0 | 0 | 0 | 0 | 0 | 1 |
| Allobaculum_OTU#882             | 0 | 0 | 0 | 0 | 0 | 0 | 0 | 0 | 0 | 0 | 0 | 0 | 0 | 1 |
| Paludibacter_OTU#883            | 0 | 0 | 0 | 0 | 1 | 0 | 0 | 0 | 0 | 0 | 0 | 0 | 0 | 1 |
| Paludibacter_OTU#884            | 0 | 0 | 0 | 0 | 0 | 0 | 0 | 0 | 0 | 0 | 0 | 0 | 0 | 1 |
| Barnesiella_OTU#885             | 0 | 0 | 0 | 0 | 0 | 0 | 0 | 0 | 0 | 0 | 0 | 0 | 0 | 1 |
| Tannerella_OTU#886              | 0 | 0 | 0 | 0 | 0 | 0 | 0 | 0 | 0 | 0 | 0 | 0 | 0 | 1 |
| Paludibacter_OTU#887            | 0 | 0 | 0 | 0 | 1 | 0 | 0 | 0 | 0 | 0 | 0 | 0 | 0 | 1 |
| Barnesiella_OTU#888             | 0 | 0 | 0 | 0 | 0 | 0 | 0 | 0 | 0 | 0 | 0 | 0 | 0 | 1 |
| Limibacter_OTU#889              | 0 | 0 | 0 | 0 | 0 | 0 | 0 | 0 | 0 | 0 | 0 | 0 | 0 | 1 |
| Paludibacter_OTU#890            | 0 | 0 | 0 | 0 | 0 | 0 | 0 | 0 | 0 | 0 | 0 | 0 | 0 | 1 |

Supplementary Table 3

|                                    |   |   |   |   |   |   |   |   |   |   |   |   |   |   |
|------------------------------------|---|---|---|---|---|---|---|---|---|---|---|---|---|---|
| Tannerella_OTU#891                 | 0 | 0 | 0 | 0 | 0 | 0 | 0 | 0 | 0 | 0 | 0 | 0 | 0 | 1 |
| Paludibacter_OTU#892               | 0 | 0 | 0 | 0 | 0 | 0 | 0 | 0 | 0 | 0 | 0 | 0 | 0 | 1 |
| Paludibacter_OTU#893               | 0 | 0 | 0 | 0 | 0 | 0 | 1 | 0 | 0 | 0 | 0 | 0 | 0 | 1 |
| Tannerella_OTU#894                 | 0 | 0 | 0 | 0 | 0 | 0 | 0 | 0 | 0 | 0 | 0 | 0 | 0 | 1 |
| Tannerella_OTU#895                 | 0 | 0 | 0 | 0 | 0 | 0 | 0 | 0 | 0 | 0 | 0 | 0 | 0 | 1 |
| Anaerophaga_OTU#896                | 0 | 0 | 0 | 0 | 0 | 0 | 0 | 0 | 0 | 0 | 0 | 0 | 0 | 1 |
| Peptococcus_OTU#897                | 0 | 0 | 0 | 0 | 1 | 3 | 1 | 1 | 0 | 0 | 0 | 0 | 0 | 0 |
| Anaerophaga_OTU#898                | 0 | 0 | 0 | 0 | 1 | 0 | 1 | 0 | 0 | 0 | 0 | 0 | 0 | 0 |
| Parasutterella_OTU#899             | 0 | 0 | 0 | 0 | 1 | 0 | 1 | 0 | 0 | 0 | 0 | 0 | 0 | 0 |
| Lishizhenia_OTU#900                | 0 | 0 | 0 | 0 | 1 | 0 | 0 | 0 | 0 | 0 | 0 | 0 | 0 | 0 |
| Tannerella_OTU#901                 | 0 | 0 | 0 | 0 | 1 | 0 | 0 | 0 | 0 | 0 | 0 | 0 | 0 | 0 |
| Anaerophaga_OTU#902                | 0 | 0 | 0 | 0 | 1 | 0 | 0 | 0 | 0 | 0 | 0 | 0 | 0 | 0 |
| Dorea_OTU#903                      | 0 | 0 | 0 | 0 | 1 | 1 | 2 | 1 | 0 | 0 | 0 | 0 | 0 | 0 |
| unclassified Bacteroidales_OTU#904 | 0 | 0 | 0 | 0 | 1 | 0 | 0 | 1 | 0 | 0 | 0 | 0 | 0 | 0 |
| Limibacter_OTU#905                 | 0 | 0 | 0 | 0 | 1 | 0 | 0 | 0 | 0 | 0 | 0 | 0 | 0 | 0 |
| Paludibacter_OTU#906               | 0 | 0 | 0 | 0 | 1 | 0 | 0 | 0 | 0 | 0 | 0 | 0 | 0 | 0 |
| Limibacter_OTU#907                 | 0 | 0 | 0 | 0 | 1 | 0 | 0 | 0 | 0 | 0 | 0 | 0 | 0 | 0 |
| Paludibacter_OTU#908               | 0 | 0 | 0 | 0 | 1 | 0 | 0 | 0 | 0 | 0 | 0 | 0 | 0 | 0 |
| Paludibacter_OTU#909               | 0 | 0 | 0 | 0 | 1 | 0 | 0 | 0 | 0 | 0 | 0 | 0 | 0 | 0 |
| Paludibacter_OTU#910               | 0 | 0 | 0 | 0 | 1 | 0 | 0 | 0 | 0 | 0 | 0 | 0 | 0 | 0 |
| Akkermansia_OTU#911                | 0 | 0 | 0 | 0 | 1 | 0 | 0 | 0 | 0 | 0 | 0 | 0 | 0 | 0 |
| Paludibacter_OTU#912               | 0 | 0 | 0 | 0 | 1 | 0 | 0 | 0 | 0 | 0 | 0 | 0 | 0 | 0 |
| Anaerophaga_OTU#913                | 0 | 0 | 0 | 0 | 1 | 0 | 0 | 0 | 0 | 0 | 0 | 0 | 0 | 0 |
| Paludibacter_OTU#914               | 0 | 0 | 0 | 0 | 1 | 0 | 0 | 0 | 0 | 0 | 0 | 0 | 0 | 0 |
| Oscillibacter_OTU#915              | 0 | 0 | 0 | 0 | 2 | 4 | 0 | 0 | 0 | 0 | 0 | 0 | 0 | 0 |
| Butyricimonas_OTU#916              | 0 | 0 | 0 | 0 | 1 | 0 | 0 | 0 | 0 | 0 | 0 | 0 | 0 | 0 |
| Paludibacter_OTU#917               | 0 | 0 | 0 | 0 | 1 | 0 | 0 | 0 | 0 | 0 | 0 | 0 | 0 | 0 |
| Paludibacter_OTU#918               | 0 | 0 | 0 | 0 | 2 | 0 | 0 | 0 | 0 | 0 | 0 | 0 | 0 | 0 |
| Paludibacter_OTU#919               | 0 | 0 | 0 | 0 | 1 | 0 | 0 | 0 | 0 | 0 | 0 | 0 | 0 | 0 |
| Paludibacter_OTU#920               | 0 | 0 | 0 | 0 | 1 | 0 | 0 | 0 | 0 | 0 | 0 | 0 | 0 | 0 |

Supplementary Table 3

|                                    |   |   |   |   |   |   |   |   |   |   |   |   |   |   |
|------------------------------------|---|---|---|---|---|---|---|---|---|---|---|---|---|---|
| Paludibacter_OTU#921               | 0 | 0 | 0 | 0 | 1 | 0 | 0 | 0 | 0 | 0 | 0 | 0 | 0 | 0 |
| Barnesiella_OTU#922                | 0 | 0 | 0 | 0 | 1 | 0 | 0 | 0 | 0 | 0 | 0 | 0 | 0 | 0 |
| Aquiflexum_OTU#923                 | 0 | 0 | 0 | 0 | 1 | 0 | 0 | 0 | 0 | 0 | 0 | 0 | 0 | 0 |
| Paludibacter_OTU#924               | 0 | 0 | 0 | 0 | 1 | 0 | 0 | 0 | 0 | 0 | 0 | 0 | 0 | 0 |
| Paludibacter_OTU#925               | 0 | 0 | 0 | 0 | 1 | 0 | 0 | 0 | 0 | 0 | 0 | 0 | 0 | 0 |
| Paludibacter_OTU#926               | 0 | 0 | 0 | 0 | 1 | 0 | 0 | 0 | 0 | 0 | 0 | 0 | 0 | 0 |
| Paludibacter_OTU#927               | 0 | 0 | 0 | 0 | 1 | 0 | 0 | 0 | 0 | 0 | 0 | 0 | 0 | 0 |
| Paludibacter_OTU#928               | 0 | 0 | 0 | 0 | 1 | 0 | 0 | 0 | 0 | 0 | 0 | 0 | 0 | 0 |
| Paludibacter_OTU#929               | 0 | 0 | 0 | 0 | 1 | 0 | 0 | 0 | 0 | 0 | 0 | 0 | 0 | 0 |
| Paludibacter_OTU#930               | 0 | 0 | 0 | 0 | 1 | 0 | 0 | 0 | 0 | 0 | 0 | 0 | 0 | 0 |
| unclassified Bacteroidales_OTU#931 | 0 | 0 | 0 | 0 | 1 | 0 | 1 | 0 | 0 | 0 | 0 | 0 | 0 | 0 |
| Paludibacter_OTU#932               | 0 | 0 | 0 | 0 | 1 | 0 | 0 | 0 | 0 | 0 | 0 | 0 | 0 | 0 |
| Barnesiella_OTU#933                | 0 | 0 | 0 | 0 | 1 | 0 | 0 | 0 | 0 | 0 | 0 | 0 | 0 | 0 |
| Sharpea_OTU#934                    | 0 | 0 | 0 | 0 | 1 | 0 | 0 | 0 | 0 | 0 | 0 | 0 | 0 | 0 |
| Tannerella_OTU#935                 | 0 | 0 | 0 | 0 | 1 | 0 | 0 | 0 | 0 | 0 | 0 | 0 | 0 | 0 |
| Barnesiella_OTU#936                | 0 | 0 | 0 | 0 | 1 | 0 | 0 | 0 | 0 | 0 | 0 | 0 | 0 | 0 |
| Allobaculum_OTU#937                | 0 | 0 | 0 | 0 | 1 | 0 | 0 | 0 | 0 | 0 | 0 | 0 | 0 | 0 |
| Rikenella_OTU#938                  | 0 | 0 | 0 | 0 | 1 | 0 | 0 | 0 | 0 | 0 | 0 | 0 | 0 | 0 |
| Paludibacter_OTU#939               | 0 | 0 | 0 | 0 | 1 | 0 | 0 | 0 | 0 | 0 | 0 | 0 | 0 | 0 |
| Barnesiella_OTU#940                | 0 | 0 | 0 | 0 | 0 | 1 | 0 | 0 | 0 | 0 | 0 | 0 | 0 | 0 |
| Barnesiella_OTU#941                | 0 | 0 | 0 | 0 | 0 | 2 | 1 | 0 | 0 | 0 | 0 | 0 | 0 | 0 |
| Hallella_OTU#942                   | 0 | 0 | 0 | 0 | 0 | 1 | 0 | 0 | 0 | 0 | 0 | 0 | 0 | 0 |
| Barnesiella_OTU#943                | 0 | 0 | 0 | 0 | 0 | 1 | 0 | 0 | 0 | 0 | 0 | 0 | 0 | 0 |
| Paludibacter_OTU#944               | 0 | 0 | 0 | 0 | 0 | 1 | 0 | 0 | 0 | 0 | 0 | 0 | 0 | 0 |
| Paludibacter_OTU#945               | 0 | 0 | 0 | 0 | 0 | 1 | 0 | 0 | 0 | 0 | 0 | 0 | 0 | 0 |
| Blautia_OTU#946                    | 0 | 0 | 0 | 0 | 0 | 1 | 1 | 1 | 0 | 0 | 0 | 0 | 0 | 0 |
| Paludibacter_OTU#947               | 0 | 0 | 0 | 0 | 0 | 1 | 0 | 0 | 0 | 0 | 0 | 0 | 0 | 0 |
| Paludibacter_OTU#948               | 0 | 0 | 0 | 0 | 0 | 1 | 0 | 0 | 0 | 0 | 0 | 0 | 0 | 0 |
| Limibacter_OTU#949                 | 0 | 0 | 0 | 0 | 0 | 1 | 0 | 0 | 0 | 0 | 0 | 0 | 0 | 0 |
| Paludibacter_OTU#950               | 0 | 0 | 0 | 0 | 0 | 1 | 0 | 0 | 0 | 0 | 0 | 0 | 0 | 0 |

Supplementary Table 3

|                      |   |   |   |   |   |   |   |   |   |   |   |   |   |   |
|----------------------|---|---|---|---|---|---|---|---|---|---|---|---|---|---|
| Paludibacter_OTU#951 | 0 | 0 | 0 | 0 | 0 | 1 | 0 | 0 | 0 | 0 | 0 | 0 | 0 | 0 |
| Barnesiella_OTU#952  | 0 | 0 | 0 | 0 | 0 | 1 | 0 | 0 | 0 | 0 | 0 | 0 | 0 | 0 |
| Paludibacter_OTU#953 | 0 | 0 | 0 | 0 | 0 | 1 | 1 | 0 | 0 | 0 | 0 | 0 | 0 | 0 |
| Paludibacter_OTU#954 | 0 | 0 | 0 | 0 | 0 | 1 | 0 | 0 | 0 | 0 | 0 | 0 | 0 | 0 |
| Barnesiella_OTU#955  | 0 | 0 | 0 | 0 | 0 | 1 | 0 | 0 | 0 | 0 | 0 | 0 | 0 | 0 |
| Paludibacter_OTU#956 | 0 | 0 | 0 | 0 | 0 | 1 | 0 | 0 | 0 | 0 | 0 | 0 | 0 | 0 |
| Blautia_OTU#957      | 0 | 0 | 0 | 0 | 0 | 1 | 3 | 2 | 0 | 0 | 0 | 0 | 0 | 0 |
| Paludibacter_OTU#958 | 0 | 0 | 0 | 0 | 0 | 1 | 0 | 0 | 0 | 0 | 0 | 0 | 0 | 0 |
| Aquiflexum_OTU#959   | 0 | 0 | 0 | 0 | 0 | 1 | 0 | 0 | 0 | 0 | 0 | 0 | 0 | 0 |
| Paludibacter_OTU#960 | 0 | 0 | 0 | 0 | 0 | 2 | 0 | 0 | 0 | 0 | 0 | 0 | 0 | 0 |
| Paludibacter_OTU#961 | 0 | 0 | 0 | 0 | 0 | 1 | 0 | 0 | 0 | 0 | 0 | 0 | 0 | 0 |
| Limibacter_OTU#962   | 0 | 0 | 0 | 0 | 0 | 1 | 0 | 0 | 0 | 0 | 0 | 0 | 0 | 0 |
| Paludibacter_OTU#963 | 0 | 0 | 0 | 0 | 0 | 1 | 0 | 0 | 0 | 0 | 0 | 0 | 0 | 0 |
| Paludibacter_OTU#964 | 0 | 0 | 0 | 0 | 0 | 1 | 0 | 0 | 0 | 0 | 0 | 0 | 0 | 0 |
| Belliella_OTU#965    | 0 | 0 | 0 | 0 | 0 | 1 | 0 | 0 | 0 | 0 | 0 | 0 | 0 | 0 |
| Paludibacter_OTU#966 | 0 | 0 | 0 | 0 | 0 | 1 | 0 | 0 | 0 | 0 | 0 | 0 | 0 | 0 |
| Paludibacter_OTU#967 | 0 | 0 | 0 | 0 | 0 | 1 | 0 | 0 | 0 | 0 | 0 | 0 | 0 | 0 |
| Tannerella_OTU#968   | 0 | 0 | 0 | 0 | 0 | 1 | 0 | 0 | 0 | 0 | 0 | 0 | 0 | 0 |
| Barnesiella_OTU#969  | 0 | 0 | 0 | 0 | 0 | 1 | 0 | 0 | 0 | 0 | 0 | 0 | 0 | 0 |
| Paludibacter_OTU#970 | 0 | 0 | 0 | 0 | 0 | 1 | 0 | 0 | 0 | 0 | 0 | 0 | 0 | 0 |
| Barnesiella_OTU#971  | 0 | 0 | 0 | 0 | 0 | 1 | 0 | 0 | 0 | 0 | 0 | 0 | 0 | 0 |
| Barnesiella_OTU#972  | 0 | 0 | 0 | 0 | 0 | 1 | 0 | 0 | 0 | 0 | 0 | 0 | 0 | 0 |
| Barnesiella_OTU#973  | 0 | 0 | 0 | 0 | 0 | 1 | 0 | 0 | 0 | 0 | 0 | 0 | 0 | 0 |
| Tannerella_OTU#974   | 0 | 0 | 0 | 0 | 0 | 1 | 0 | 0 | 0 | 0 | 0 | 0 | 0 | 0 |
| Paludibacter_OTU#975 | 0 | 0 | 0 | 0 | 0 | 1 | 0 | 0 | 0 | 0 | 0 | 0 | 0 | 0 |
| Paludibacter_OTU#976 | 0 | 0 | 0 | 0 | 0 | 1 | 0 | 0 | 0 | 0 | 0 | 0 | 0 | 0 |
| Paludibacter_OTU#977 | 0 | 0 | 0 | 0 | 0 | 1 | 0 | 0 | 0 | 0 | 0 | 0 | 0 | 0 |
| Barnesiella_OTU#978  | 0 | 0 | 0 | 0 | 0 | 1 | 0 | 0 | 0 | 0 | 0 | 0 | 0 | 0 |
| Tannerella_OTU#979   | 0 | 0 | 0 | 0 | 0 | 1 | 0 | 0 | 0 | 0 | 0 | 0 | 0 | 0 |
| Barnesiella_OTU#980  | 0 | 0 | 0 | 0 | 0 | 1 | 0 | 0 | 0 | 0 | 0 | 0 | 0 | 0 |

Supplementary Table 3

|                                    |   |   |   |   |   |   |   |   |   |   |   |   |   |   |
|------------------------------------|---|---|---|---|---|---|---|---|---|---|---|---|---|---|
| Barnesiella_OTU#981                | 0 | 0 | 0 | 0 | 0 | 1 | 0 | 0 | 0 | 0 | 0 | 0 | 0 | 0 |
| Barnesiella_OTU#982                | 0 | 0 | 0 | 0 | 0 | 1 | 0 | 0 | 0 | 0 | 0 | 0 | 0 | 0 |
| Paludibacter_OTU#983               | 0 | 0 | 0 | 0 | 0 | 1 | 0 | 0 | 0 | 0 | 0 | 0 | 0 | 0 |
| Oscillibacter_OTU#984              | 0 | 0 | 0 | 0 | 0 | 1 | 0 | 2 | 0 | 0 | 0 | 0 | 0 | 0 |
| Acetanaerobacterium_OTU#985        | 0 | 0 | 0 | 0 | 0 | 1 | 0 | 0 | 0 | 0 | 0 | 0 | 0 | 0 |
| Paludibacter_OTU#986               | 0 | 0 | 0 | 0 | 0 | 1 | 0 | 0 | 0 | 0 | 0 | 0 | 0 | 0 |
| unclassified Bacteroidales_OTU#987 | 0 | 0 | 0 | 0 | 0 | 1 | 1 | 0 | 0 | 0 | 0 | 0 | 0 | 0 |
| Paludibacter_OTU#988               | 0 | 0 | 0 | 0 | 0 | 1 | 0 | 0 | 0 | 0 | 0 | 0 | 0 | 0 |
| Butyricoccus_OTU#989               | 0 | 0 | 0 | 0 | 0 | 1 | 1 | 1 | 0 | 0 | 0 | 0 | 0 | 0 |
| Paludibacter_OTU#990               | 0 | 0 | 0 | 0 | 0 | 1 | 0 | 0 | 0 | 0 | 0 | 0 | 0 | 0 |
| Paludibacter_OTU#991               | 0 | 0 | 0 | 0 | 0 | 1 | 0 | 0 | 0 | 0 | 0 | 0 | 0 | 0 |
| Tannerella_OTU#992                 | 0 | 0 | 0 | 0 | 0 | 1 | 0 | 0 | 0 | 0 | 0 | 0 | 0 | 0 |
| Paludibacter_OTU#993               | 0 | 0 | 0 | 0 | 0 | 1 | 0 | 0 | 0 | 0 | 0 | 0 | 0 | 0 |
| Paludibacter_OTU#994               | 0 | 0 | 0 | 0 | 0 | 1 | 0 | 0 | 0 | 0 | 0 | 0 | 0 | 0 |
| Barnesiella_OTU#995                | 0 | 0 | 0 | 0 | 0 | 1 | 0 | 0 | 0 | 0 | 0 | 0 | 0 | 0 |
| Craurococcus_OTU#996               | 0 | 0 | 0 | 0 | 0 | 1 | 0 | 0 | 0 | 0 | 0 | 0 | 0 | 0 |
| Anaerophaga_OTU#997                | 0 | 0 | 0 | 0 | 0 | 1 | 0 | 0 | 0 | 0 | 0 | 0 | 0 | 0 |
| Dorea_OTU#998                      | 0 | 0 | 0 | 0 | 0 | 1 | 0 | 0 | 0 | 0 | 0 | 0 | 0 | 0 |
| Paludibacter_OTU#999               | 0 | 0 | 0 | 0 | 0 | 1 | 0 | 0 | 0 | 0 | 0 | 0 | 0 | 0 |
| Barnesiella_OTU#1000               | 0 | 0 | 0 | 0 | 0 | 1 | 0 | 0 | 0 | 0 | 0 | 0 | 0 | 0 |
| Limibacter_OTU#1001                | 0 | 0 | 0 | 0 | 0 | 1 | 0 | 0 | 0 | 0 | 0 | 0 | 0 | 0 |
| Proteiniphilum_OTU#1002            | 0 | 0 | 0 | 0 | 0 | 1 | 0 | 0 | 0 | 0 | 0 | 0 | 0 | 0 |
| Anaerotruncus_OTU#1003             | 0 | 0 | 0 | 0 | 0 | 1 | 0 | 0 | 0 | 0 | 0 | 0 | 0 | 0 |
| Butyrivibrio_OTU#1004              | 0 | 0 | 0 | 0 | 0 | 1 | 0 | 0 | 0 | 0 | 0 | 0 | 0 | 0 |
| Tannerella_OTU#1005                | 0 | 0 | 0 | 0 | 0 | 1 | 0 | 0 | 0 | 0 | 0 | 0 | 0 | 0 |
| Rikenella_OTU#1006                 | 0 | 0 | 0 | 0 | 0 | 1 | 0 | 0 | 0 | 0 | 0 | 0 | 0 | 0 |
| Paludibacter_OTU#1007              | 0 | 0 | 0 | 0 | 0 | 1 | 0 | 0 | 0 | 0 | 0 | 0 | 0 | 0 |
| Paludibacter_OTU#1008              | 0 | 0 | 0 | 0 | 0 | 1 | 0 | 0 | 0 | 0 | 0 | 0 | 0 | 0 |
| Rikenella_OTU#1009                 | 0 | 0 | 0 | 0 | 0 | 1 | 0 | 0 | 0 | 0 | 0 | 0 | 0 | 0 |
| Barnesiella_OTU#1010               | 0 | 0 | 0 | 0 | 0 | 1 | 0 | 0 | 0 | 0 | 0 | 0 | 0 | 0 |

Supplementary Table 3

|                                     |   |   |   |   |   |   |   |   |   |   |   |   |   |   |
|-------------------------------------|---|---|---|---|---|---|---|---|---|---|---|---|---|---|
| Paludibacter_OTU#1011               | 0 | 0 | 0 | 0 | 0 | 1 | 0 | 0 | 0 | 0 | 0 | 0 | 0 | 0 |
| Paludibacter_OTU#1012               | 0 | 0 | 0 | 0 | 0 | 1 | 0 | 0 | 0 | 0 | 0 | 0 | 0 | 0 |
| Paludibacter_OTU#1013               | 0 | 0 | 0 | 0 | 0 | 0 | 1 | 0 | 0 | 0 | 0 | 0 | 0 | 0 |
| Butyrivibrio_OTU#1014               | 0 | 0 | 0 | 0 | 0 | 0 | 1 | 0 | 0 | 0 | 0 | 0 | 0 | 0 |
| Marvinbryantia_OTU#1015             | 0 | 0 | 0 | 0 | 0 | 0 | 1 | 0 | 0 | 0 | 0 | 0 | 0 | 0 |
| Coprococcus_OTU#1016                | 0 | 0 | 0 | 0 | 0 | 0 | 1 | 0 | 0 | 0 | 0 | 0 | 0 | 0 |
| Anaerophaga_OTU#1017                | 0 | 0 | 0 | 0 | 0 | 0 | 1 | 0 | 0 | 0 | 0 | 0 | 0 | 0 |
| Robinsoniella_OTU#1018              | 0 | 0 | 0 | 0 | 0 | 0 | 1 | 0 | 0 | 0 | 0 | 0 | 0 | 0 |
| Syntrophococcus_OTU#1019            | 0 | 0 | 0 | 0 | 0 | 0 | 1 | 0 | 0 | 0 | 0 | 0 | 0 | 0 |
| Robinsoniella_OTU#1020              | 0 | 0 | 0 | 0 | 0 | 0 | 1 | 0 | 0 | 0 | 0 | 0 | 0 | 0 |
| Roseburia_OTU#1021                  | 0 | 0 | 0 | 0 | 0 | 0 | 2 | 2 | 0 | 0 | 0 | 0 | 0 | 0 |
| Dorea_OTU#1022                      | 0 | 0 | 0 | 0 | 0 | 0 | 1 | 0 | 0 | 0 | 0 | 0 | 0 | 0 |
| Papillibacter_OTU#1023              | 0 | 0 | 0 | 0 | 0 | 0 | 2 | 0 | 0 | 0 | 0 | 0 | 0 | 0 |
| Paludibacter_OTU#1024               | 0 | 0 | 0 | 0 | 0 | 0 | 1 | 0 | 0 | 0 | 0 | 0 | 0 | 0 |
| Dorea_OTU#1025                      | 0 | 0 | 0 | 0 | 0 | 0 | 1 | 0 | 0 | 0 | 0 | 0 | 0 | 0 |
| Paludibacter_OTU#1026               | 0 | 0 | 0 | 0 | 0 | 0 | 1 | 0 | 0 | 0 | 0 | 0 | 0 | 0 |
| Paludibacter_OTU#1027               | 0 | 0 | 0 | 0 | 0 | 0 | 1 | 0 | 0 | 0 | 0 | 0 | 0 | 0 |
| Butyricicoccus_OTU#1028             | 0 | 0 | 0 | 0 | 0 | 0 | 1 | 0 | 0 | 0 | 0 | 0 | 0 | 0 |
| Barnesiella_OTU#1029                | 0 | 0 | 0 | 0 | 0 | 0 | 1 | 0 | 0 | 0 | 0 | 0 | 0 | 0 |
| Coprococcus_OTU#1030                | 0 | 0 | 0 | 0 | 0 | 0 | 1 | 0 | 0 | 0 | 0 | 0 | 0 | 0 |
| Robinsoniella_OTU#1031              | 0 | 0 | 0 | 0 | 0 | 0 | 1 | 0 | 0 | 0 | 0 | 0 | 0 | 0 |
| Paludibacter_OTU#1032               | 0 | 0 | 0 | 0 | 0 | 0 | 1 | 0 | 0 | 0 | 0 | 0 | 0 | 0 |
| Lactobacillus_OTU#1033              | 0 | 0 | 0 | 0 | 0 | 0 | 1 | 0 | 0 | 0 | 0 | 0 | 0 | 0 |
| Robinsoniella_OTU#1034              | 0 | 0 | 0 | 0 | 0 | 0 | 2 | 3 | 0 | 0 | 0 | 0 | 0 | 0 |
| Lachnobacterium_OTU#1035            | 0 | 0 | 0 | 0 | 0 | 0 | 1 | 0 | 0 | 0 | 0 | 0 | 0 | 0 |
| Lachnobacterium_OTU#1036            | 0 | 0 | 0 | 0 | 0 | 0 | 1 | 0 | 0 | 0 | 0 | 0 | 0 | 0 |
| Oscillibacter_OTU#1037              | 0 | 0 | 0 | 0 | 0 | 0 | 1 | 0 | 0 | 0 | 0 | 0 | 0 | 0 |
| Anaerotruncus_OTU#1038              | 0 | 0 | 0 | 0 | 0 | 0 | 1 | 0 | 0 | 0 | 0 | 0 | 0 | 0 |
| Howardella_OTU#1039                 | 0 | 0 | 0 | 0 | 0 | 0 | 1 | 0 | 0 | 0 | 0 | 0 | 0 | 0 |
| unclassified Clostridiales_OTU#1040 | 0 | 0 | 0 | 0 | 0 | 0 | 1 | 1 | 0 | 0 | 0 | 0 | 0 | 0 |

Supplementary Table 3



|                                     |   |   |   |   |   |   |   |   |   |   |   |   |   |   |
|-------------------------------------|---|---|---|---|---|---|---|---|---|---|---|---|---|---|
| Howardella_OTU#1041                 | 0 | 0 | 0 | 0 | 0 | 0 | 1 | 0 | 0 | 0 | 0 | 0 | 0 | 0 |
| Paludibacter_OTU#1042               | 0 | 0 | 0 | 0 | 0 | 0 | 1 | 0 | 0 | 0 | 0 | 0 | 0 | 0 |
| Paludibacter_OTU#1043               | 0 | 0 | 0 | 0 | 0 | 0 | 1 | 0 | 0 | 0 | 0 | 0 | 0 | 0 |
| Catonella_OTU#1044                  | 0 | 0 | 0 | 0 | 0 | 0 | 1 | 0 | 0 | 0 | 0 | 0 | 0 | 0 |
| Rikenella_OTU#1045                  | 0 | 0 | 0 | 0 | 0 | 0 | 1 | 0 | 0 | 0 | 0 | 0 | 0 | 0 |
| Dorea_OTU#1046                      | 0 | 0 | 0 | 0 | 0 | 0 | 1 | 0 | 0 | 0 | 0 | 0 | 0 | 0 |
| Marvinbryantia_OTU#1047             | 0 | 0 | 0 | 0 | 0 | 0 | 1 | 0 | 0 | 0 | 0 | 0 | 0 | 0 |
| Limibacter_OTU#1048                 | 0 | 0 | 0 | 0 | 0 | 0 | 1 | 0 | 0 | 0 | 0 | 0 | 0 | 0 |
| Acetitomaculum_OTU#1049             | 0 | 0 | 0 | 0 | 0 | 0 | 1 | 0 | 0 | 0 | 0 | 0 | 0 | 0 |
| Dorea_OTU#1050                      | 0 | 0 | 0 | 0 | 0 | 0 | 2 | 0 | 0 | 0 | 0 | 0 | 0 | 0 |
| Robinsoniella_OTU#1051              | 0 | 0 | 0 | 0 | 0 | 0 | 1 | 0 | 0 | 0 | 0 | 0 | 0 | 0 |
| unclassified Bacteroidetes_OTU#1052 | 0 | 0 | 0 | 0 | 0 | 0 | 1 | 1 | 0 | 0 | 0 | 0 | 0 | 0 |
| Butyricicoccus_OTU#1053             | 0 | 0 | 0 | 0 | 0 | 0 | 1 | 0 | 0 | 0 | 0 | 0 | 0 | 0 |
| Barnesiella_OTU#1054                | 0 | 0 | 0 | 0 | 0 | 0 | 1 | 0 | 0 | 0 | 0 | 0 | 0 | 0 |
| Paludibacter_OTU#1055               | 0 | 0 | 0 | 0 | 0 | 0 | 1 | 0 | 0 | 0 | 0 | 0 | 0 | 0 |
| Howardella_OTU#1056                 | 0 | 0 | 0 | 0 | 0 | 0 | 1 | 0 | 0 | 0 | 0 | 0 | 0 | 0 |
| Marvinbryantia_OTU#1057             | 0 | 0 | 0 | 0 | 0 | 0 | 1 | 0 | 0 | 0 | 0 | 0 | 0 | 0 |
| Robinsoniella_OTU#1058              | 0 | 0 | 0 | 0 | 0 | 0 | 1 | 0 | 0 | 0 | 0 | 0 | 0 | 0 |
| Coprococcus_OTU#1059                | 0 | 0 | 0 | 0 | 0 | 0 | 1 | 0 | 0 | 0 | 0 | 0 | 0 | 0 |
| Coprococcus_OTU#1060                | 0 | 0 | 0 | 0 | 0 | 0 | 1 | 0 | 0 | 0 | 0 | 0 | 0 | 0 |
| Limibacter_OTU#1061                 | 0 | 0 | 0 | 0 | 0 | 0 | 1 | 0 | 0 | 0 | 0 | 0 | 0 | 0 |
| Barnesiella_OTU#1062                | 0 | 0 | 0 | 0 | 0 | 0 | 1 | 0 | 0 | 0 | 0 | 0 | 0 | 0 |
| Coprococcus_OTU#1063                | 0 | 0 | 0 | 0 | 0 | 0 | 1 | 0 | 0 | 0 | 0 | 0 | 0 | 0 |
| Tannerella_OTU#1064                 | 0 | 0 | 0 | 0 | 0 | 0 | 1 | 0 | 0 | 0 | 0 | 0 | 0 | 0 |
| Marvinbryantia_OTU#1065             | 0 | 0 | 0 | 0 | 0 | 0 | 1 | 1 | 0 | 0 | 0 | 0 | 0 | 0 |
| Paludibacter_OTU#1066               | 0 | 0 | 0 | 0 | 0 | 0 | 1 | 0 | 0 | 0 | 0 | 0 | 0 | 0 |
| Barnesiella_OTU#1067                | 0 | 0 | 0 | 0 | 0 | 0 | 1 | 0 | 0 | 0 | 0 | 0 | 0 | 0 |
| Paludibacter_OTU#1068               | 0 | 0 | 0 | 0 | 0 | 0 | 1 | 0 | 0 | 0 | 0 | 0 | 0 | 0 |
| Acetitomaculum_OTU#1069             | 0 | 0 | 0 | 0 | 0 | 0 | 1 | 0 | 0 | 0 | 0 | 0 | 0 | 0 |
| Barnesiella_OTU#1070                | 0 | 0 | 0 | 0 | 0 | 0 | 1 | 0 | 0 | 0 | 0 | 0 | 0 | 0 |

Supplementary Table 3

|                          |   |   |   |   |   |   |   |   |   |   |   |   |   |   |
|--------------------------|---|---|---|---|---|---|---|---|---|---|---|---|---|---|
| Barnesiella_OTU#1071     | 0 | 0 | 0 | 0 | 0 | 0 | 1 | 0 | 0 | 0 | 0 | 0 | 0 | 0 |
| Paludibacter_OTU#1072    | 0 | 0 | 0 | 0 | 0 | 0 | 0 | 1 | 0 | 0 | 0 | 0 | 0 | 0 |
| Howardella_OTU#1073      | 0 | 0 | 0 | 0 | 0 | 0 | 0 | 1 | 0 | 0 | 0 | 0 | 0 | 0 |
| Paraprevotella_OTU#1074  | 0 | 0 | 0 | 0 | 0 | 0 | 0 | 1 | 0 | 0 | 0 | 0 | 0 | 0 |
| Anaerophaga_OTU#1075     | 0 | 0 | 0 | 0 | 0 | 0 | 0 | 1 | 0 | 0 | 0 | 0 | 0 | 0 |
| Anaerotruncus_OTU#1076   | 0 | 0 | 0 | 0 | 0 | 0 | 0 | 1 | 0 | 0 | 0 | 0 | 0 | 0 |
| Anaerotruncus_OTU#1077   | 0 | 0 | 0 | 0 | 0 | 0 | 0 | 1 | 0 | 0 | 0 | 0 | 0 | 0 |
| Anaerotruncus_OTU#1078   | 0 | 0 | 0 | 0 | 0 | 0 | 0 | 1 | 0 | 0 | 0 | 0 | 0 | 0 |
| Acetitomaculum_OTU#1079  | 0 | 0 | 0 | 0 | 0 | 0 | 0 | 1 | 0 | 0 | 0 | 0 | 0 | 0 |
| Coprococcus_OTU#1080     | 0 | 0 | 0 | 0 | 0 | 0 | 0 | 1 | 0 | 0 | 0 | 0 | 0 | 0 |
| Marvinbryantia_OTU#1081  | 0 | 0 | 0 | 0 | 0 | 0 | 0 | 1 | 0 | 0 | 0 | 0 | 0 | 0 |
| Coprococcus_OTU#1082     | 0 | 0 | 0 | 0 | 0 | 0 | 0 | 1 | 0 | 0 | 0 | 0 | 0 | 0 |
| Acetitomaculum_OTU#1083  | 0 | 0 | 0 | 0 | 0 | 0 | 0 | 1 | 0 | 0 | 0 | 0 | 0 | 0 |
| Sporobacter_OTU#1084     | 0 | 0 | 0 | 0 | 0 | 0 | 0 | 1 | 0 | 0 | 0 | 0 | 0 | 0 |
| Barnesiella_OTU#1085     | 0 | 0 | 0 | 0 | 0 | 0 | 0 | 1 | 0 | 0 | 0 | 0 | 0 | 0 |
| Robinsoniella_OTU#1086   | 0 | 0 | 0 | 0 | 0 | 0 | 0 | 1 | 0 | 0 | 0 | 0 | 0 | 0 |
| Paludibacter_OTU#1087    | 0 | 0 | 0 | 0 | 0 | 0 | 0 | 1 | 0 | 0 | 0 | 0 | 0 | 0 |
| Howardella_OTU#1088      | 0 | 0 | 0 | 0 | 0 | 0 | 0 | 3 | 0 | 0 | 0 | 0 | 0 | 0 |
| Butyricoccus_OTU#1089    | 0 | 0 | 0 | 0 | 0 | 0 | 0 | 1 | 0 | 0 | 0 | 0 | 0 | 0 |
| Barnesiella_OTU#1090     | 0 | 0 | 0 | 0 | 0 | 0 | 0 | 1 | 0 | 0 | 0 | 0 | 0 | 0 |
| Oscillibacter_OTU#1091   | 0 | 0 | 0 | 0 | 0 | 0 | 0 | 2 | 0 | 0 | 0 | 0 | 0 | 0 |
| Barnesiella_OTU#1092     | 0 | 0 | 0 | 0 | 0 | 0 | 0 | 1 | 0 | 0 | 0 | 0 | 0 | 0 |
| Paludibacter_OTU#1093    | 0 | 0 | 0 | 0 | 0 | 0 | 0 | 1 | 0 | 0 | 0 | 0 | 0 | 0 |
| Barnesiella_OTU#1094     | 0 | 0 | 0 | 0 | 0 | 0 | 0 | 1 | 0 | 0 | 0 | 0 | 0 | 0 |
| Marvinbryantia_OTU#1095  | 0 | 0 | 0 | 0 | 0 | 0 | 0 | 1 | 0 | 0 | 0 | 0 | 0 | 0 |
| Robinsoniella_OTU#1096   | 0 | 0 | 0 | 0 | 0 | 0 | 0 | 1 | 0 | 0 | 0 | 0 | 0 | 0 |
| Paludibacter_OTU#1097    | 0 | 0 | 0 | 0 | 0 | 0 | 0 | 1 | 0 | 0 | 0 | 0 | 0 | 0 |
| Lachnobacterium_OTU#1098 | 0 | 0 | 0 | 0 | 0 | 0 | 0 | 1 | 0 | 0 | 0 | 0 | 0 | 0 |
| Coprococcus_OTU#1099     | 0 | 0 | 0 | 0 | 0 | 0 | 0 | 4 | 0 | 0 | 0 | 0 | 0 | 0 |
| Dorea_OTU#1100           | 0 | 0 | 0 | 0 | 0 | 0 | 0 | 1 | 0 | 0 | 0 | 0 | 0 | 0 |

Supplementary Table 3

|                                   |   |   |   |   |   |   |   |   |   |   |   |   |   |   |
|-----------------------------------|---|---|---|---|---|---|---|---|---|---|---|---|---|---|
| Anaerophaga_OTU#1101              | 0 | 0 | 0 | 0 | 0 | 0 | 0 | 1 | 0 | 0 | 0 | 0 | 0 | 0 |
| Paludibacter_OTU#1102             | 0 | 0 | 0 | 0 | 0 | 0 | 0 | 1 | 0 | 0 | 0 | 0 | 0 | 0 |
| Robinsoniella_OTU#1103            | 0 | 0 | 0 | 0 | 0 | 0 | 0 | 1 | 0 | 0 | 0 | 0 | 0 | 0 |
| Paludibacter_OTU#1104             | 0 | 0 | 0 | 0 | 0 | 0 | 0 | 1 | 0 | 0 | 0 | 0 | 0 | 0 |
| Dorea_OTU#1105                    | 0 | 0 | 0 | 0 | 0 | 0 | 0 | 1 | 0 | 0 | 0 | 0 | 0 | 0 |
| Paludibacter_OTU#1106             | 0 | 0 | 0 | 0 | 0 | 0 | 0 | 1 | 0 | 0 | 0 | 0 | 0 | 0 |
| Dorea_OTU#1107                    | 0 | 0 | 0 | 0 | 0 | 0 | 0 | 3 | 0 | 0 | 0 | 0 | 0 | 0 |
| Marvinbryantia_OTU#1108           | 0 | 0 | 0 | 0 | 0 | 0 | 0 | 1 | 0 | 0 | 0 | 0 | 0 | 0 |
| Robinsoniella_OTU#1109            | 0 | 0 | 0 | 0 | 0 | 0 | 0 | 1 | 0 | 0 | 0 | 0 | 0 | 0 |
| Anaerophaga_OTU#1110              | 0 | 0 | 0 | 0 | 0 | 0 | 0 | 1 | 0 | 0 | 0 | 0 | 0 | 0 |
| Roseburia_OTU#1111                | 0 | 0 | 0 | 0 | 0 | 0 | 0 | 1 | 0 | 0 | 0 | 0 | 0 | 0 |
| Paludibacter_OTU#1112             | 0 | 0 | 0 | 0 | 0 | 0 | 0 | 1 | 0 | 0 | 0 | 0 | 0 | 0 |
| Paludibacter_OTU#1113             | 0 | 0 | 0 | 0 | 0 | 0 | 0 | 1 | 0 | 0 | 0 | 0 | 0 | 0 |
| Limibacter_OTU#1114               | 0 | 0 | 0 | 0 | 0 | 0 | 0 | 1 | 0 | 0 | 0 | 0 | 0 | 0 |
| Agromonas_OTU#1115                | 0 | 0 | 0 | 0 | 0 | 0 | 0 | 1 | 0 | 0 | 0 | 0 | 0 | 0 |
| Limibacter_OTU#1116               | 0 | 0 | 0 | 0 | 0 | 0 | 0 | 1 | 0 | 0 | 0 | 0 | 0 | 0 |
| Robinsoniella_OTU#1117            | 0 | 0 | 0 | 0 | 0 | 0 | 0 | 1 | 0 | 0 | 0 | 0 | 0 | 0 |
| Anaerotruncus_OTU#1118            | 0 | 0 | 0 | 0 | 0 | 0 | 0 | 1 | 0 | 0 | 0 | 0 | 0 | 0 |
| Paludibacter_OTU#1119             | 0 | 0 | 0 | 0 | 0 | 0 | 0 | 1 | 0 | 0 | 0 | 0 | 0 | 0 |
| Pseudozobellia_OTU#1120           | 0 | 0 | 0 | 0 | 0 | 0 | 0 | 1 | 0 | 0 | 0 | 0 | 0 | 0 |
| Anaerophaga_OTU#1121              | 0 | 0 | 0 | 0 | 0 | 0 | 0 | 1 | 0 | 0 | 0 | 0 | 0 | 0 |
| Sporobacterium_OTU#1122           | 0 | 0 | 0 | 0 | 0 | 0 | 0 | 1 | 0 | 0 | 0 | 0 | 0 | 0 |
| Anaerophaga_OTU#1123              | 0 | 0 | 0 | 0 | 0 | 0 | 0 | 1 | 0 | 0 | 0 | 0 | 0 | 0 |
| Anaerophaga_OTU#1124              | 0 | 0 | 0 | 0 | 0 | 0 | 0 | 1 | 0 | 0 | 0 | 0 | 0 | 0 |
| Hydrogenoanaerobacterium_OTU#1125 | 0 | 0 | 0 | 0 | 0 | 0 | 0 | 1 | 0 | 0 | 0 | 0 | 0 | 0 |
| Coproccoccus_OTU#1126             | 0 | 0 | 0 | 0 | 0 | 0 | 0 | 1 | 0 | 0 | 0 | 0 | 0 | 0 |
| Rikenella_OTU#1127                | 0 | 0 | 0 | 0 | 0 | 0 | 0 | 1 | 0 | 0 | 0 | 0 | 0 | 0 |
| Paraeggerthella_OTU#1128          | 0 | 0 | 0 | 0 | 0 | 0 | 0 | 1 | 0 | 0 | 0 | 0 | 0 | 0 |
| Paludibacter_OTU#1129             | 0 | 0 | 0 | 0 | 0 | 0 | 0 | 1 | 0 | 0 | 0 | 0 | 0 | 0 |
| Coproccoccus_OTU#1130             | 0 | 0 | 0 | 0 | 0 | 0 | 0 | 1 | 0 | 0 | 0 | 0 | 0 | 0 |

Supplementary Table 3

|                              |   |   |   |   |   |   |   |   |   |   |   |   |   |   |
|------------------------------|---|---|---|---|---|---|---|---|---|---|---|---|---|---|
| Faecalibacterium_OTU#1131    | 0 | 0 | 0 | 0 | 0 | 0 | 0 | 1 | 0 | 0 | 0 | 0 | 0 | 0 |
| Paludibacter_OTU#1132        | 0 | 0 | 0 | 0 | 0 | 0 | 0 | 1 | 0 | 0 | 0 | 0 | 0 | 0 |
| Anaerophaga_OTU#1133         | 0 | 0 | 0 | 0 | 0 | 0 | 0 | 1 | 0 | 0 | 0 | 0 | 0 | 0 |
| Blautia_OTU#1134             | 0 | 0 | 0 | 0 | 0 | 0 | 0 | 1 | 0 | 0 | 0 | 0 | 0 | 0 |
| Anaerophaga_OTU#1135         | 0 | 0 | 0 | 0 | 0 | 0 | 0 | 1 | 0 | 0 | 0 | 0 | 0 | 0 |
| Oscillibacter_OTU#1136       | 0 | 0 | 0 | 0 | 0 | 0 | 0 | 1 | 0 | 0 | 0 | 0 | 0 | 0 |
| Dorea_OTU#1137               | 0 | 0 | 0 | 0 | 0 | 0 | 0 | 1 | 0 | 0 | 0 | 0 | 0 | 0 |
| Butyrivibrio_OTU#1138        | 0 | 0 | 0 | 0 | 0 | 0 | 0 | 1 | 0 | 0 | 0 | 0 | 0 | 0 |
| Pseudozobellia_OTU#1139      | 0 | 0 | 0 | 0 | 0 | 0 | 0 | 1 | 0 | 0 | 0 | 0 | 0 | 0 |
| Paludibacter_OTU#1140        | 0 | 0 | 0 | 0 | 0 | 0 | 0 | 1 | 0 | 0 | 0 | 0 | 0 | 0 |
| Robinsoniella_OTU#1141       | 0 | 0 | 0 | 0 | 0 | 0 | 0 | 1 | 0 | 0 | 0 | 0 | 0 | 0 |
| Alkaliflexus_OTU#1142        | 0 | 0 | 0 | 0 | 0 | 0 | 0 | 1 | 0 | 0 | 0 | 0 | 0 | 0 |
| Paludibacter_OTU#1143        | 0 | 0 | 0 | 0 | 0 | 0 | 0 | 1 | 0 | 0 | 0 | 0 | 0 | 0 |
| Acetanaerobacterium_OTU#1144 | 0 | 0 | 0 | 0 | 0 | 0 | 0 | 1 | 0 | 0 | 0 | 0 | 0 | 0 |
| Asaccharobacter_OTU#1145     | 0 | 0 | 0 | 0 | 1 | 0 | 0 | 0 | 0 | 0 | 0 | 0 | 0 | 0 |

**Supplementary Table 4. SIMPER analysis of *Ace2*<sup>+/-y</sup> and *Ace2*<sup>-/-y</sup> mice with or without rapamycin treatment.**

SIMPER analysis was performed to detect OTUs contributing to the dissimilarities in ileocaecal microbial communities related to host genotype and rapamycin (RAPA) treatments. All significant OTUs are ranked according to their contribution. Average abundance of OTUs in each treatment/genotype group is shown as percentages. Contribution of each OTU to the overall community is also given in %. Bray Curtis dissimilar measures were used to perform the analyses.

| S.No | Taxon                                 | <i>Ace2</i> <sup>-/-y</sup> | <i>Ace2</i> <sup>+/-y</sup> | <i>Ace2</i> <sup>+/-y</sup> +<br>RAPA | Contribution | Cumulative % |
|------|---------------------------------------|-----------------------------|-----------------------------|---------------------------------------|--------------|--------------|
| 1    | Limibacter_OTU#1                      | 26.4                        | 15.7                        | 11.8                                  | 4.688        | 8.222        |
| 2    | Tannerella_OTU#21                     | 1.02                        | 9.94                        | 10.4                                  | 3.656        | 14.63        |
| 3    | Paludibacter_OTU#35                   | 1                           | 9.52                        | 8.36                                  | 3.021        | 19.93        |
| 4    | Paludibacter_OTU#180                  | 0                           | 3.56                        | 7.18                                  | 2.373        | 24.1         |
| 5    | Lactobacillus_OTU#50                  | 2.48                        | 1.68                        | 6.38                                  | 2.19         | 27.94        |
| 6    | Paludibacter_OTU#9                    | 7.55                        | 2                           | 2.44                                  | 1.788        | 31.07        |
| 7    | Barnesiella_OTU#37                    | 1.35                        | 5.44                        | 3.6                                   | 1.565        | 33.82        |
| 8    | Parasutterella_OTU#23                 | 4.1                         | 0                           | 0                                     | 1.262        | 36.03        |
| 9    | Marvinbryantia_OTU#152                | 0.125                       | 3.5                         | 0.22                                  | 1.232        | 38.19        |
| 10   | Paludibacter_OTU#40                   | 1.8                         | 2.18                        | 4.52                                  | 1.119        | 40.15        |
| 11   | Allobaculum_OTU#173                   | 0                           | 2.84                        | 2.06                                  | 1.048        | 41.99        |
| 12   | Parasutterella_OTU#55                 | 2.92                        | 4.28                        | 1.9                                   | 1.011        | 43.76        |
| 13   | unclassified_Porphryomonadaceae_OTU#2 | 3.5                         | 0.7                         | 0.7                                   | 0.9831       | 45.49        |
| 14   | Lactobacillus_OTU#30                  | 0.65                        | 0.46                        | 2.98                                  | 0.9723       | 47.19        |
| 15   | Allobaculum_OTU#16                    | 2.88                        | 0                           | 0                                     | 0.8846       | 48.74        |
| 16   | Anaerophaga_OTU#241                   | 0                           | 0.38                        | 2.58                                  | 0.8785       | 50.29        |
| 17   | Allobaculum_OTU#3                     | 2.63                        | 1                           | 0.24                                  | 0.8108       | 51.71        |
| 18   | Paludibacter_OTU#162                  | 0.2                         | 2.4                         | 2.42                                  | 0.7792       | 53.07        |
| 19   | Helicobacter_OTU#63                   | 2.47                        | 0                           | 0                                     | 0.7615       | 54.41        |
| 20   | Allobaculum_OTU#17                    | 1.95                        | 0                           | 0                                     | 0.6          | 55.46        |
| 21   | Anaerophaga_OTU#8                     | 2.17                        | 0.4                         | 1.22                                  | 0.5931       | 56.5         |
| 22   | Paludibacter_OTU#5                    | 1.87                        | 0.4                         | 0.28                                  | 0.5692       | 57.5         |
| 23   | Lachnobacterium_OTU#38                | 1.6                         | 0.02                        | 0.02                                  | 0.4923       | 58.36        |
| 24   | Rikenella_OTU#22                      | 2                           | 0.96                        | 0.88                                  | 0.4323       | 59.12        |
| 25   | Rikenella_OTU#11                      | 1.65                        | 0.42                        | 0.38                                  | 0.4138       | 59.85        |
| 26   | Barnesiella_OTU#26                    | 1.28                        | 0                           | 0                                     | 0.3923       | 60.54        |
| 27   | Rikenella_OTU#18                      | 1.73                        | 0.78                        | 1.06                                  | 0.3769       | 61.2         |
| 28   | Allobaculum_OTU#13                    | 1.18                        | 0.2                         | 0.04                                  | 0.3615       | 61.83        |
| 29   | Dorea_OTU#182                         | 0                           | 0.84                        | 0.1                                   | 0.2946       | 62.35        |
| 30   | Paludibacter_OTU#257                  | 0                           | 0.54                        | 0.74                                  | 0.2723       | 62.82        |
| 31   | Anaerophaga_OTU#19                    | 0.775                       | 0.32                        | 0.28                                  | 0.2231       | 63.22        |

|    |                                          |       |      |      |         |       |
|----|------------------------------------------|-------|------|------|---------|-------|
| 32 | Paludibacter_OTU#12                      | 0.425 | 0.56 | 0.44 | 0.2108  | 63.59 |
| 33 | Ureaplasma_OTU#82                        | 0.675 | 0    | 0    | 0.2077  | 63.95 |
| 34 | Paludibacter_OTU#247                     | 0.15  | 0.48 | 0.6  | 0.2031  | 64.31 |
| 35 | Paludibacter_OTU#432                     | 0.025 | 0.24 | 0.58 | 0.2023  | 64.66 |
| 36 | Paludibacter_OTU#277                     | 0.025 | 0.56 | 0.44 | 0.1985  | 65.01 |
| 37 | Butyrivibrio_OTU#181                     | 0     | 0.46 | 0.14 | 0.1969  | 65.35 |
| 38 | Allobaculum_OTU#236                      | 0     | 0.4  | 0.38 | 0.1761  | 65.66 |
| 39 | Paludibacter_OTU#169                     | 0     | 0.28 | 0.48 | 0.1708  | 65.96 |
| 40 | Limibacter_OTU#125                       | 0.15  | 0.54 | 0.28 | 0.1685  | 66.26 |
| 41 | Paludibacter_OTU#334                     | 0.2   | 0.56 | 0.42 | 0.1592  | 66.54 |
| 42 | Barnesiella_OTU#46                       | 0.625 | 0.14 | 0.26 | 0.1585  | 66.82 |
| 43 | Paludibacter_OTU#67                      | 0.1   | 0.46 | 0.48 | 0.15    | 67.08 |
| 44 | Robinsoniella_OTU#172                    | 0     | 0.36 | 0.12 | 0.1416  | 67.33 |
| 45 | Coprococcus_OTU#39                       | 0.225 | 0.28 | 0    | 0.1415  | 67.57 |
| 46 | Paludibacter_OTU#571                     | 0     | 0.24 | 0.32 | 0.1385  | 67.82 |
| 47 | Paludibacter_OTU#598                     | 0     | 0.04 | 0.38 | 0.13    | 68.05 |
| 48 | Tannerella_OTU#157                       | 0.075 | 0.32 | 0.36 | 0.1292  | 68.27 |
| 49 | Paludibacter_OTU#43                      | 0.525 | 0.26 | 0.5  | 0.1231  | 68.49 |
| 50 | Barnesiella_OTU#595                      | 0     | 0.2  | 0.3  | 0.1223  | 68.7  |
| 51 | Anaerophaga_OTU#32                       | 0.225 | 0.06 | 0.2  | 0.1177  | 68.91 |
| 52 | unclassified_Porphyrromonadaceae_OTU#4   | 0.375 | 0.02 | 0    | 0.1162  | 69.11 |
| 53 | Anaerophaga_OTU#59                       | 0.35  | 0.12 | 0.06 | 0.1146  | 69.31 |
| 54 | Oscillibacter_OTU#206                    | 0     | 0.3  | 0.04 | 0.11    | 69.51 |
| 55 | Barnesiella_OTU#15                       | 0.35  | 0.16 | 0.22 | 0.11    | 69.7  |
| 56 | Mucispirillum_OTU#356                    | 0.35  | 0    | 0    | 0.1077  | 69.89 |
| 57 | unclassified_Porphyrromonadaceae_OTU#318 | 0.025 | 0.1  | 0.34 | 0.1077  | 70.08 |
| 58 | unclassified_Porphyrromonadaceae_OTU#260 | 0.025 | 0.2  | 0.2  | 0.1062  | 70.26 |
| 59 | Paludibacter_OTU#80                      | 0.025 | 0.14 | 0.3  | 0.1062  | 70.45 |
| 60 | Paludibacter_OTU#33                      | 0.325 | 0.12 | 0.06 | 0.1054  | 70.63 |
| 61 | Paludibacter_OTU#302                     | 0     | 0.18 | 0.26 | 0.1031  | 70.82 |
| 62 | Barnesiella_OTU#201                      | 0     | 0.26 | 0.12 | 0.1008  | 70.99 |
| 63 | Olsenella_OTU#127                        | 0.325 | 0.02 | 0.02 | 0.1     | 71.17 |
| 64 | Helicobacter_OTU#346                     | 0.325 | 0    | 0    | 0.1     | 71.34 |
| 65 | Allobaculum_OTU#319                      | 0     | 0.16 | 0.24 | 0.09692 | 71.51 |
| 66 | Paludibacter_OTU#592                     | 0     | 0.02 | 0.28 | 0.09615 | 71.68 |
| 67 | Lactobacillus_OTU#357                    | 0.3   | 0    | 0    | 0.09231 | 71.84 |
| 68 | Barnesiella_OTU#261                      | 0     | 0.2  | 0.14 | 0.09    | 72    |
| 69 | Paludibacter_OTU#154                     | 0.15  | 0.26 | 0.2  | 0.09    | 72.16 |
| 70 | Tannerella_OTU#422                       | 0.05  | 0.26 | 0.06 | 0.08923 | 72.32 |
| 71 | Paludibacter_OTU#66                      | 0.075 | 0.02 | 0.26 | 0.08769 | 72.47 |
| 72 | Anaerophaga_OTU#617                      | 0     | 0.06 | 0.26 | 0.08769 | 72.62 |

Supplementary Table 4

|     |                                    |       |      |      |         |       |
|-----|------------------------------------|-------|------|------|---------|-------|
| 73  | Parasutterella_OTU#119             | 0.275 | 0    | 0    | 0.08462 | 72.77 |
| 74  | Paraprevotella_OTU#6               | 0.275 | 0    | 0    | 0.08462 | 72.92 |
| 75  | Marvinbryantia_OTU#192             | 0     | 0.24 | 0    | 0.08308 | 73.07 |
| 76  | Paludibacter_OTU#604               | 0     | 0.04 | 0.24 | 0.08308 | 73.21 |
| 77  | Lachnobacterium_OTU#52             | 0.225 | 0.06 | 0    | 0.07923 | 73.35 |
| 78  | Acetitomaculum_OTU#308             | 0     | 0.22 | 0.02 | 0.07847 | 73.49 |
| 79  | Paludibacter_OTU#114               | 0.05  | 0.18 | 0.22 | 0.07692 | 73.62 |
| 80  | Limibacter_OTU#118                 | 0.15  | 0.14 | 0.24 | 0.07615 | 73.76 |
| 81  | Paludibacter_OTU#620               | 0     | 0.1  | 0.2  | 0.07462 | 73.89 |
| 82  | Paludibacter_OTU#110               | 0.25  | 0.16 | 0.2  | 0.07385 | 74.02 |
| 83  | Paludibacter_OTU#81                | 0.175 | 0.08 | 0.06 | 0.07308 | 74.14 |
| 84  | Paludibacter_OTU#103               | 0.15  | 0.16 | 0.12 | 0.07231 | 74.27 |
| 85  | Paludibacter_OTU#264               | 0.025 | 0.2  | 0.12 | 0.0723  | 74.4  |
| 86  | Tannerella_OTU#148                 | 0.05  | 0.1  | 0.2  | 0.07    | 74.52 |
| 87  | Anaerophaga_OTU#577                | 0     | 0    | 0.2  | 0.06923 | 74.64 |
| 88  | Limibacter_OTU#89                  | 0.225 | 0    | 0    | 0.06923 | 74.76 |
| 89  | Mucispirillum_OTU#343              | 0.225 | 0    | 0    | 0.06923 | 74.89 |
| 90  | Limibacter_OTU#142                 | 0.225 | 0.04 | 0.12 | 0.06615 | 75    |
| 91  | Anaerophaga_OTU#337                | 0.025 | 0.08 | 0.2  | 0.06615 | 75.12 |
| 92  | Limibacter_OTU#298                 | 0.125 | 0.1  | 0    | 0.06538 | 75.23 |
| 93  | Paludibacter_OTU#564               | 0     | 0.12 | 0.14 | 0.06385 | 75.34 |
| 94  | Paludibacter_OTU#7                 | 0.1   | 0.06 | 0.16 | 0.06385 | 75.46 |
| 95  | Limibacter_OTU#64                  | 0.2   | 0    | 0.06 | 0.06385 | 75.57 |
| 96  | Paludibacter_OTU#726               | 0     | 0.14 | 0.1  | 0.06308 | 75.68 |
| 97  | Limibacter_OTU#238                 | 0     | 0.08 | 0.14 | 0.06231 | 75.79 |
| 98  | unclassified_Bacteroidetes_OTU#150 | 0.15  | 0.1  | 0.14 | 0.06154 | 75.9  |
| 99  | Parasutterella_OTU#138             | 0.2   | 0    | 0    | 0.06154 | 76    |
| 100 | Flexithrix_OTU#53                  | 0.2   | 0    | 0    | 0.06154 | 76.11 |
| 101 | Barnesiella_OTU#267                | 0     | 0.16 | 0.04 | 0.06001 | 76.22 |
| 102 | Barnesiella_OTU#587                | 0     | 0.1  | 0.14 | 0.06    | 76.32 |
| 103 | Limibacter_OTU#48                  | 0.15  | 0.08 | 0.16 | 0.06    | 76.43 |
| 104 | Parabacteroides_OTU#70             | 0.025 | 0.04 | 0.14 | 0.05923 | 76.53 |
| 105 | Paludibacter_OTU#123               | 0.15  | 0.04 | 0.06 | 0.05923 | 76.64 |
| 106 | unclassified_Bacteroidales_OTU#41  | 0.125 | 0.02 | 0.16 | 0.05923 | 76.74 |
| 107 | Paludibacter_OTU#281               | 0     | 0.16 | 0.1  | 0.05769 | 76.84 |
| 108 | Allobaculum_OTU#254                | 0.1   | 0.14 | 0.04 | 0.05769 | 76.94 |
| 109 | Butyricoccus_OTU#202               | 0     | 0.16 | 0    | 0.05538 | 77.04 |
| 110 | Tannerella_OTU#286                 | 0     | 0.12 | 0.12 | 0.05538 | 77.14 |
| 111 | Anaerophaga_OTU#656                | 0     | 0.04 | 0.14 | 0.05462 | 77.23 |
| 112 | unclassified_TM7_OTU#589           | 0     | 0.08 | 0.14 | 0.05461 | 77.33 |
| 113 | Anaerotruncus_OTU#92               | 0.075 | 0.12 | 0.04 | 0.05386 | 77.42 |

Supplementary Table 4

|     |                                          |       |      |      |         |       |
|-----|------------------------------------------|-------|------|------|---------|-------|
| 114 | Paludibacter_OTU#596                     | 0     | 0.06 | 0.14 | 0.05385 | 77.52 |
| 115 | Paludibacter_OTU#115                     | 0.175 | 0    | 0    | 0.05385 | 77.61 |
| 116 | Acetitomaculum_OTU#443                   | 0.025 | 0.14 | 0    | 0.0531  | 77.7  |
| 117 | Acetanaerobacterium_OTU#305              | 0     | 0.14 | 0.04 | 0.05309 | 77.8  |
| 118 | Paludibacter_OTU#196                     | 0     | 0.08 | 0.14 | 0.05308 | 77.89 |
| 119 | Barnesiella_OTU#325                      | 0.025 | 0.14 | 0.06 | 0.05231 | 77.98 |
| 120 | Paludibacter_OTU#263                     | 0     | 0.1  | 0.08 | 0.05154 | 78.07 |
| 121 | Paludibacter_OTU#45                      | 0.1   | 0.08 | 0.04 | 0.05077 | 78.16 |
| 122 | Paludibacter_OTU#24                      | 0.125 | 0.04 | 0.08 | 0.04923 | 78.25 |
| 123 | Paludibacter_OTU#389                     | 0.075 | 0    | 0.12 | 0.04923 | 78.33 |
| 124 | Lactonifactor_OTU#176                    | 0     | 0.14 | 0    | 0.04847 | 78.42 |
| 125 | Paludibacter_OTU#224                     | 0     | 0.06 | 0.12 | 0.04846 | 78.5  |
| 126 | Barnesiella_OTU#563                      | 0     | 0.12 | 0.06 | 0.04692 | 78.59 |
| 127 | Butyrivibrio_OTU#174                     | 0     | 0.12 | 0.02 | 0.04692 | 78.67 |
| 128 | Paludibacter_OTU#487                     | 0.025 | 0.06 | 0.12 | 0.04692 | 78.75 |
| 129 | Dichelobacter_OTU#34                     | 0.15  | 0    | 0    | 0.04615 | 78.83 |
| 130 | Anaerostipes_OTU#237                     | 0     | 0.12 | 0.04 | 0.04615 | 78.91 |
| 131 | Rikenella_OTU#165                        | 0.125 | 0.1  | 0.04 | 0.04539 | 78.99 |
| 132 | Paludibacter_OTU#573                     | 0     | 0.08 | 0.1  | 0.04538 | 79.07 |
| 133 | Roseburia_OTU#623                        | 0     | 0.02 | 0.12 | 0.04538 | 79.15 |
| 134 | Paludibacter_OTU#107                     | 0.075 | 0.12 | 0.16 | 0.04462 | 79.23 |
| 135 | Syntrophococcus_OTU#275                  | 0.025 | 0.1  | 0.04 | 0.04385 | 79.31 |
| 136 | Paludibacter_OTU#602                     | 0     | 0.04 | 0.12 | 0.04308 | 79.38 |
| 137 | Limibacter_OTU#374                       | 0.125 | 0.02 | 0.06 | 0.04308 | 79.46 |
| 138 | Anaerophaga_OTU#147                      | 0.15  | 0.04 | 0.04 | 0.04308 | 79.53 |
| 139 | Blautia_OTU#253                          | 0     | 0.1  | 0.04 | 0.04231 | 79.61 |
| 140 | Marvinbryantia_OTU#303                   | 0     | 0.12 | 0.02 | 0.04231 | 79.68 |
| 141 | Blautia_OTU#957                          | 0     | 0.12 | 0    | 0.04155 | 79.75 |
| 142 | Peptococcus_OTU#897                      | 0     | 0.12 | 0    | 0.04154 | 79.83 |
| 143 | unclassified_Bacteroidales_OTU#813       | 0     | 0    | 0.12 | 0.04154 | 79.9  |
| 144 | Marvinbryantia_OTU#259                   | 0     | 0.12 | 0    | 0.04154 | 79.97 |
| 145 | Oscillibacter_OTU#915                    | 0     | 0.12 | 0    | 0.04153 | 80.05 |
| 146 | Limibacter_OTU#519                       | 0.025 | 0.12 | 0.06 | 0.04077 | 80.12 |
| 147 | Limibacter_OTU#132                       | 0.125 | 0    | 0.02 | 0.04077 | 80.19 |
| 148 | unclassified_Porphyrromonadaceae_OTU#340 | 0     | 0.08 | 0.08 | 0.04    | 80.26 |
| 149 | Limibacter_OTU#112                       | 0.025 | 0.06 | 0.1  | 0.04    | 80.33 |
| 150 | Paludibacter_OTU#677                     | 0     | 0.08 | 0.06 | 0.03923 | 80.4  |
| 151 | Limibacter_OTU#57                        | 0.125 | 0    | 0    | 0.03846 | 80.47 |
| 152 | Paludibacter_OTU#72                      | 0.125 | 0    | 0    | 0.03846 | 80.53 |
| 153 | Parasutterella_OTU#393                   | 0.125 | 0    | 0    | 0.03846 | 80.6  |
| 154 | Limibacter_OTU#186                       | 0.05  | 0.08 | 0.04 | 0.03846 | 80.67 |



|     |                                        |       |      |      |         |       |
|-----|----------------------------------------|-------|------|------|---------|-------|
| 155 | Paludibacter_OTU#510                   | 0.025 | 0.08 | 0.08 | 0.03846 | 80.74 |
| 156 | Tannerella_OTU#644                     | 0     | 0.08 | 0.06 | 0.03769 | 80.8  |
| 157 | Tannerella_OTU#745                     | 0     | 0.08 | 0.06 | 0.03769 | 80.87 |
| 158 | unclassified_Bacteroidales_OTU#252     | 0     | 0.02 | 0.1  | 0.03692 | 80.93 |
| 159 | Paludibacter_OTU#597                   | 0     | 0.02 | 0.1  | 0.03692 | 81    |
| 160 | Limibacter_OTU#231                     | 0     | 0.1  | 0.02 | 0.03539 | 81.06 |
| 161 | Acetitomaculum_OTU#222                 | 0     | 0.08 | 0.04 | 0.03539 | 81.12 |
| 162 | Paludibacter_OTU#567                   | 0     | 0.04 | 0.08 | 0.03538 | 81.18 |
| 163 | Robinsoniella_OTU#1034                 | 0     | 0.1  | 0    | 0.03463 | 81.24 |
| 164 | Barnesiella_OTU#166                    | 0.075 | 0.12 | 0.06 | 0.03462 | 81.3  |
| 165 | Syntrophococcus_OTU#203                | 0     | 0.1  | 0    | 0.03462 | 81.37 |
| 166 | Coprococcus_OTU#306                    | 0     | 0.1  | 0    | 0.03462 | 81.43 |
| 167 | Dorea_OTU#903                          | 0     | 0.1  | 0    | 0.03462 | 81.49 |
| 168 | Paludibacter_OTU#640                   | 0     | 0    | 0.1  | 0.03462 | 81.55 |
| 169 | Paludibacter_OTU#678                   | 0     | 0    | 0.1  | 0.03462 | 81.61 |
| 170 | Lawsonia_OTU#56                        | 0.075 | 0.04 | 0.02 | 0.03461 | 81.67 |
| 171 | Anaerotruncus_OTU#351                  | 0.075 | 0.04 | 0    | 0.03385 | 81.73 |
| 172 | Limibacter_OTU#423                     | 0.1   | 0.02 | 0.02 | 0.03385 | 81.79 |
| 173 | Paludibacter_OTU#507                   | 0.075 | 0    | 0.04 | 0.03385 | 81.85 |
| 174 | Paludibacter_OTU#111                   | 0.075 | 0.02 | 0.04 | 0.03308 | 81.9  |
| 175 | Limibacter_OTU#396                     | 0.1   | 0.02 | 0    | 0.03308 | 81.96 |
| 176 | Paludibacter_OTU#42                    | 0.1   | 0.02 | 0    | 0.03308 | 82.02 |
| 177 | Butyricicoccus_OTU#204                 | 0.025 | 0.08 | 0    | 0.03232 | 82.08 |
| 178 | Paludibacter_OTU#229                   | 0.025 | 0.04 | 0.08 | 0.03231 | 82.13 |
| 179 | Paludibacter_OTU#550                   | 0.025 | 0.08 | 0.04 | 0.03231 | 82.19 |
| 180 | Paludibacter_OTU#268                   | 0     | 0.06 | 0.06 | 0.03231 | 82.25 |
| 181 | Coprococcus_OTU#580                    | 0     | 0.08 | 0.02 | 0.03154 | 82.3  |
| 182 | Robinsoniella_OTU#859                  | 0     | 0.08 | 0.02 | 0.03154 | 82.36 |
| 183 | Paludibacter_OTU#524                   | 0.05  | 0    | 0.06 | 0.03154 | 82.41 |
| 184 | Barnesiella_OTU#684                    | 0     | 0.02 | 0.08 | 0.03154 | 82.47 |
| 185 | Lachnobacterium_OTU#590                | 0     | 0.06 | 0.04 | 0.03154 | 82.52 |
| 186 | Paludibacter_OTU#719                   | 0     | 0.06 | 0.04 | 0.03154 | 82.58 |
| 187 | unclassified_Bacteroidales_OTU#90      | 0.025 | 0.02 | 0.08 | 0.03154 | 82.63 |
| 188 | Coprococcus_OTU#307                    | 0.025 | 0.08 | 0    | 0.03077 | 82.69 |
| 189 | Limibacter_OTU#49                      | 0.05  | 0.06 | 0.02 | 0.03077 | 82.74 |
| 190 | Lachnobacterium_OTU#552                | 0.025 | 0.08 | 0    | 0.03077 | 82.8  |
| 191 | Limibacter_OTU#136                     | 0.1   | 0    | 0    | 0.03077 | 82.85 |
| 192 | unclassified_Bacteroidales_OTU#365     | 0.1   | 0    | 0    | 0.03077 | 82.9  |
| 193 | unclassified_Porphyrimonadaceae_OTU#60 | 0.1   | 0    | 0    | 0.03077 | 82.96 |
| 194 | Bacteroides_OTU#71                     | 0.1   | 0    | 0    | 0.03077 | 83.01 |
| 195 | Anaerophaga_OTU#86                     | 0.1   | 0    | 0    | 0.03077 | 83.07 |

|     |                                         |       |      |      |         |       |
|-----|-----------------------------------------|-------|------|------|---------|-------|
| 196 | unclassified_Bacteroidetes_OTU#469      | 0.1   | 0    | 0    | 0.03077 | 83.12 |
| 197 | Paludibacter_OTU#28                     | 0.1   | 0    | 0    | 0.03077 | 83.17 |
| 198 | Paludibacter_OTU#84                     | 0.1   | 0    | 0    | 0.03077 | 83.23 |
| 199 | Limibacter_OTU#363                      | 0.1   | 0    | 0    | 0.03077 | 83.28 |
| 200 | Blautia_OTU#117                         | 0.075 | 0.04 | 0    | 0.03077 | 83.34 |
| 201 | Limibacter_OTU#317                      | 0.025 | 0.06 | 0.04 | 0.03    | 83.39 |
| 202 | Allobaculum_OTU#270                     | 0     | 0.08 | 0.02 | 0.03    | 83.44 |
| 203 | Rikenella_OTU#131                       | 0.075 | 0    | 0.06 | 0.03    | 83.49 |
| 204 | Paludibacter_OTU#641                    | 0     | 0.02 | 0.08 | 0.03    | 83.55 |
| 205 | Bacteroides_OTU#579                     | 0     | 0.04 | 0.06 | 0.03    | 83.6  |
| 206 | Paludibacter_OTU#245                    | 0     | 0.08 | 0.02 | 0.02846 | 83.65 |
| 207 | Coprococcus_OTU#1099                    | 0     | 0.08 | 0    | 0.02771 | 83.7  |
| 208 | Roseburia_OTU#1021                      | 0     | 0.08 | 0    | 0.0277  | 83.75 |
| 209 | Oscillibacter_OTU#290                   | 0     | 0.08 | 0    | 0.0277  | 83.79 |
| 210 | Limibacter_OTU#194                      | 0     | 0.08 | 0    | 0.0277  | 83.84 |
| 211 | Paludibacter_OTU#486                    | 0.025 | 0.02 | 0.06 | 0.02769 | 83.89 |
| 212 | Alistipes_OTU#608                       | 0     | 0    | 0.08 | 0.02769 | 83.94 |
| 213 | unclassified_Porphyrimonadaceae_OTU#729 | 0     | 0    | 0.08 | 0.02769 | 83.99 |
| 214 | Lactobacillus_OTU#685                   | 0     | 0    | 0.08 | 0.02769 | 84.04 |
| 215 | Paludibacter_OTU#713                    | 0     | 0    | 0.08 | 0.02769 | 84.09 |
| 216 | Paludibacter_OTU#816                    | 0     | 0    | 0.08 | 0.02769 | 84.13 |
| 217 | Turicibacter_OTU#207                    | 0     | 0.08 | 0    | 0.02769 | 84.18 |
| 218 | Oscillibacter_OTU#175                   | 0.075 | 0.02 | 0    | 0.02692 | 84.23 |
| 219 | Paludibacter_OTU#378                    | 0.075 | 0.02 | 0    | 0.02692 | 84.28 |
| 220 | unclassified_Lachnospiraceae_OTU#420    | 0.025 | 0.06 | 0    | 0.02692 | 84.33 |
| 221 | unclassified_Bacteroidetes_OTU#102      | 0.05  | 0    | 0.04 | 0.02615 | 84.37 |
| 222 | unclassified_Bacteroidales_OTU#429      | 0.025 | 0.06 | 0    | 0.02539 | 84.42 |
| 223 | Limibacter_OTU#453                      | 0.025 | 0.04 | 0.06 | 0.02539 | 84.46 |
| 224 | Anaerophaga_OTU#400                     | 0.05  | 0.04 | 0.06 | 0.02539 | 84.5  |
| 225 | Marvinbryantia_OTU#643                  | 0     | 0.06 | 0.02 | 0.02462 | 84.55 |
| 226 | Lachnobacterium_OTU#574                 | 0     | 0.04 | 0.04 | 0.02462 | 84.59 |
| 227 | Paludibacter_OTU#866                    | 0     | 0.04 | 0.04 | 0.02462 | 84.63 |
| 228 | Butyricoccus_OTU#646                    | 0     | 0.06 | 0.02 | 0.02462 | 84.68 |
| 229 | Paludibacter_OTU#680                    | 0     | 0.02 | 0.06 | 0.02462 | 84.72 |
| 230 | unclassified_Bacteroidetes_OTU#715      | 0     | 0.02 | 0.06 | 0.02462 | 84.76 |
| 231 | Anaerophaga_OTU#714                     | 0     | 0.02 | 0.06 | 0.02462 | 84.81 |
| 232 | Limibacter_OTU#809                      | 0     | 0.02 | 0.06 | 0.02462 | 84.85 |
| 233 | Paludibacter_OTU#669                    | 0     | 0.02 | 0.06 | 0.02461 | 84.89 |
| 234 | Paludibacter_OTU#826                    | 0     | 0.04 | 0.04 | 0.02461 | 84.94 |
| 235 | Anaerophaga_OTU#457                     | 0.025 | 0.02 | 0.04 | 0.02385 | 84.98 |
| 236 | Anaerophaga_OTU#106                     | 0.05  | 0.02 | 0.04 | 0.02385 | 85.02 |

|     |                                         |       |      |      |         |       |
|-----|-----------------------------------------|-------|------|------|---------|-------|
| 237 | Barnesiella_OTU#189                     | 0.05  | 0.02 | 0.04 | 0.02385 | 85.06 |
| 238 | Paludibacter_OTU#100                    | 0.05  | 0.04 | 0.02 | 0.02385 | 85.1  |
| 239 | Lachnobacterium_OTU#321                 | 0     | 0.06 | 0.02 | 0.02308 | 85.14 |
| 240 | unclassified_Lachnospiraceae_OTU#251    | 0     | 0.06 | 0.02 | 0.02308 | 85.18 |
| 241 | Paludibacter_OTU#462                    | 0.025 | 0.04 | 0.04 | 0.02308 | 85.22 |
| 242 | Anaerophaga_OTU#566                     | 0     | 0.02 | 0.06 | 0.02308 | 85.27 |
| 243 | Paludibacter_OTU#104                    | 0.075 | 0    | 0    | 0.02308 | 85.31 |
| 244 | Paludibacter_OTU#158                    | 0.075 | 0    | 0    | 0.02308 | 85.35 |
| 245 | Tannerella_OTU#121                      | 0.075 | 0    | 0    | 0.02308 | 85.39 |
| 246 | Limibacter_OTU#97                       | 0.075 | 0    | 0    | 0.02308 | 85.43 |
| 247 | Allobaculum_OTU#352                     | 0.075 | 0    | 0    | 0.02308 | 85.47 |
| 248 | Allobaculum_OTU#163                     | 0.075 | 0    | 0    | 0.02308 | 85.51 |
| 249 | Anaerophaga_OTU#62                      | 0.075 | 0    | 0    | 0.02308 | 85.55 |
| 250 | Coprococcus_OTU#14                      | 0.075 | 0    | 0    | 0.02308 | 85.59 |
| 251 | unclassified_Porphyrimonadaceae_OTU#837 | 0     | 0.06 | 0.02 | 0.02307 | 85.63 |
| 252 | Coprococcus_OTU#642                     | 0     | 0.04 | 0.04 | 0.02154 | 85.67 |
| 253 | Anaerophaga_OTU#687                     | 0     | 0.04 | 0.04 | 0.02154 | 85.71 |
| 254 | Paludibacter_OTU#134                    | 0.05  | 0.02 | 0.02 | 0.02154 | 85.74 |
| 255 | Ralstonia_OTU#29                        | 0.05  | 0.02 | 0.02 | 0.02154 | 85.78 |
| 256 | Paludibacter_OTU#58                     | 0.05  | 0.02 | 0.02 | 0.02154 | 85.82 |
| 257 | unclassified_Porphyrimonadaceae_OTU#489 | 0.05  | 0.02 | 0.02 | 0.02154 | 85.86 |
| 258 | Lawsonia_OTU#198                        | 0     | 0.04 | 0.04 | 0.02154 | 85.89 |
| 259 | Barnesiella_OTU#99                      | 0.05  | 0.02 | 0.02 | 0.02154 | 85.93 |
| 260 | Dorea_OTU#1107                          | 0     | 0.06 | 0    | 0.02078 | 85.97 |
| 261 | Howardella_OTU#1088                     | 0     | 0.06 | 0    | 0.02078 | 86    |
| 262 | Oscillibacter_OTU#984                   | 0     | 0.06 | 0    | 0.02078 | 86.04 |
| 263 | Coprococcus_OTU#190                     | 0     | 0.06 | 0    | 0.02077 | 86.08 |
| 264 | Syntrophococcus_OTU#178                 | 0     | 0.06 | 0    | 0.02077 | 86.11 |
| 265 | Blautia_OTU#946                         | 0     | 0.06 | 0    | 0.02077 | 86.15 |
| 266 | Butyricoccus_OTU#989                    | 0     | 0.06 | 0    | 0.02077 | 86.19 |
| 267 | Paludibacter_OTU#526                    | 0.025 | 0.02 | 0.04 | 0.02077 | 86.22 |
| 268 | Paludibacter_OTU#653                    | 0     | 0    | 0.06 | 0.02077 | 86.26 |
| 269 | Paludibacter_OTU#611                    | 0     | 0    | 0.06 | 0.02077 | 86.3  |
| 270 | Papillibacter_OTU#691                   | 0     | 0    | 0.06 | 0.02077 | 86.33 |
| 271 | Paludibacter_OTU#674                    | 0     | 0    | 0.06 | 0.02077 | 86.37 |
| 272 | Paludibacter_OTU#681                    | 0     | 0    | 0.06 | 0.02077 | 86.41 |
| 273 | Tannerella_OTU#692                      | 0     | 0    | 0.06 | 0.02077 | 86.44 |
| 274 | Paludibacter_OTU#828                    | 0     | 0    | 0.06 | 0.02077 | 86.48 |
| 275 | Paludibacter_OTU#824                    | 0     | 0    | 0.06 | 0.02077 | 86.51 |
| 276 | Anaerotruncus_OTU#191                   | 0     | 0.06 | 0    | 0.02077 | 86.55 |
| 277 | Parvimonas_OTU#283                      | 0     | 0.06 | 0    | 0.02077 | 86.59 |

|     |                            |       |      |      |         |       |
|-----|----------------------------|-------|------|------|---------|-------|
| 278 | Barnesiella_OTU#941        | 0     | 0.06 | 0    | 0.02077 | 86.62 |
| 279 | Robinsoniella_OTU#271      | 0     | 0.06 | 0    | 0.02077 | 86.66 |
| 280 | Butyricoccus_OTU#341       | 0     | 0.06 | 0    | 0.02077 | 86.7  |
| 281 | Paludibacter_OTU#250       | 0.025 | 0.04 | 0.02 | 0.02077 | 86.73 |
| 282 | Paludibacter_OTU#184       | 0     | 0.06 | 0    | 0.02077 | 86.77 |
| 283 | Paludibacter_OTU#216       | 0     | 0.06 | 0    | 0.02076 | 86.81 |
| 284 | Barnesiella_OTU#449        | 0.025 | 0    | 0.04 | 0.02    | 86.84 |
| 285 | Limibacter_OTU#404         | 0.025 | 0    | 0.04 | 0.02    | 86.88 |
| 286 | Parasporobacterium_OTU#272 | 0.025 | 0.04 | 0    | 0.02    | 86.91 |
| 287 | Asaccharobacter_OTU#868    | 0     | 0.04 | 0.02 | 0.01924 | 86.95 |
| 288 | Dorea_OTU#614              | 0     | 0.02 | 0.04 | 0.01923 | 86.98 |
| 289 | Limibacter_OTU#391         | 0.05  | 0    | 0.02 | 0.01923 | 87.01 |
| 290 | Paludibacter_OTU#371       | 0.05  | 0    | 0.02 | 0.01923 | 87.05 |
| 291 | Rikenella_OTU#168          | 0.05  | 0    | 0.02 | 0.01923 | 87.08 |
| 292 | Paludibacter_OTU#77        | 0.05  | 0    | 0.02 | 0.01923 | 87.11 |
| 293 | Rikenella_OTU#139          | 0.05  | 0    | 0.02 | 0.01923 | 87.15 |
| 294 | Paludibacter_OTU#732       | 0     | 0.02 | 0.04 | 0.01923 | 87.18 |
| 295 | Marvinbryantia_OTU#269     | 0     | 0.02 | 0.04 | 0.01923 | 87.21 |
| 296 | Tannerella_OTU#273         | 0     | 0.02 | 0.04 | 0.01923 | 87.25 |
| 297 | Anaerophaga_OTU#108        | 0.05  | 0.02 | 0    | 0.01923 | 87.28 |
| 298 | Rikenella_OTU#153          | 0.05  | 0.02 | 0    | 0.01923 | 87.32 |
| 299 | Paludibacter_OTU#427       | 0.05  | 0.02 | 0    | 0.01923 | 87.35 |
| 300 | Anaerophaga_OTU#276        | 0     | 0.04 | 0.02 | 0.01923 | 87.38 |
| 301 | Paludibacter_OTU#740       | 0     | 0.02 | 0.04 | 0.01923 | 87.42 |
| 302 | Paludibacter_OTU#821       | 0     | 0.02 | 0.04 | 0.01923 | 87.45 |
| 303 | Paludibacter_OTU#846       | 0     | 0.04 | 0.02 | 0.01922 | 87.48 |
| 304 | Limibacter_OTU#211         | 0.025 | 0.04 | 0    | 0.01846 | 87.52 |
| 305 | Paludibacter_OTU#528       | 0.025 | 0.04 | 0    | 0.01846 | 87.55 |
| 306 | Paludibacter_OTU#87        | 0.025 | 0.04 | 0    | 0.01846 | 87.58 |
| 307 | Anaerophaga_OTU#626        | 0     | 0.04 | 0.02 | 0.0177  | 87.61 |
| 308 | Dorea_OTU#755              | 0     | 0.04 | 0.02 | 0.0177  | 87.64 |
| 309 | Paludibacter_OTU#769       | 0     | 0.02 | 0.04 | 0.01769 | 87.67 |
| 310 | Paludibacter_OTU#584       | 0     | 0.02 | 0.04 | 0.01769 | 87.71 |
| 311 | Enterorhabdus_OTU#864      | 0     | 0.04 | 0.02 | 0.01769 | 87.74 |
| 312 | Paludibacter_OTU#788       | 0     | 0.04 | 0.02 | 0.01769 | 87.77 |
| 313 | Tannerella_OTU#784         | 0     | 0.04 | 0.02 | 0.01769 | 87.8  |
| 314 | Tannerella_OTU#724         | 0     | 0.04 | 0.02 | 0.01769 | 87.83 |
| 315 | Paludibacter_OTU#315       | 0     | 0.02 | 0.04 | 0.01769 | 87.86 |
| 316 | Tannerella_OTU#756         | 0     | 0.02 | 0.04 | 0.01769 | 87.89 |
| 317 | Barnesiella_OTU#616        | 0     | 0.02 | 0.04 | 0.01769 | 87.92 |
| 318 | Paludibacter_OTU#600       | 0     | 0.02 | 0.04 | 0.01769 | 87.95 |

Supplementary Table 4

|     |                                     |       |      |      |         |       |
|-----|-------------------------------------|-------|------|------|---------|-------|
| 319 | Paludibacter_OTU#581                | 0     | 0.02 | 0.04 | 0.01769 | 87.99 |
| 320 | Paludibacter_OTU#707                | 0     | 0.02 | 0.04 | 0.01769 | 88.02 |
| 321 | Barnesiella_OTU#221                 | 0     | 0.04 | 0.02 | 0.01769 | 88.05 |
| 322 | Paludibacter_OTU#255                | 0     | 0.04 | 0.02 | 0.01769 | 88.08 |
| 323 | Limibacter_OTU#226                  | 0     | 0.04 | 0.02 | 0.01769 | 88.11 |
| 324 | Paludibacter_OTU#310                | 0     | 0.04 | 0.02 | 0.01769 | 88.14 |
| 325 | Barnesiella_OTU#610                 | 0     | 0.04 | 0.02 | 0.01769 | 88.17 |
| 326 | Paludibacter_OTU#622                | 0     | 0.02 | 0.04 | 0.01769 | 88.2  |
| 327 | Paludibacter_OTU#744                | 0     | 0.02 | 0.04 | 0.01769 | 88.23 |
| 328 | Anaerophaga_OTU#721                 | 0     | 0.02 | 0.04 | 0.01769 | 88.26 |
| 329 | Rikenella_OTU#557                   | 0.025 | 0.02 | 0.02 | 0.01693 | 88.29 |
| 330 | Paludibacter_OTU#332                | 0.025 | 0.02 | 0.02 | 0.01692 | 88.32 |
| 331 | Barnesiella_OTU#435                 | 0.025 | 0.02 | 0.02 | 0.01692 | 88.35 |
| 332 | Anaerophaga_OTU#467                 | 0.05  | 0    | 0    | 0.01538 | 88.38 |
| 333 | Barnesiella_OTU#428                 | 0.05  | 0    | 0    | 0.01538 | 88.41 |
| 334 | Syntrophococcus_OTU#440             | 0.05  | 0    | 0    | 0.01538 | 88.43 |
| 335 | Allobaculum_OTU#421                 | 0.05  | 0    | 0    | 0.01538 | 88.46 |
| 336 | Paludibacter_OTU#105                | 0.05  | 0    | 0    | 0.01538 | 88.49 |
| 337 | Allobaculum_OTU#362                 | 0.05  | 0    | 0    | 0.01538 | 88.52 |
| 338 | Limibacter_OTU#354                  | 0.05  | 0    | 0    | 0.01538 | 88.54 |
| 339 | Lawsonia_OTU#91                     | 0.05  | 0    | 0    | 0.01538 | 88.57 |
| 340 | Paludibacter_OTU#10                 | 0.05  | 0    | 0    | 0.01538 | 88.6  |
| 341 | Parasutterella_OTU#376              | 0.05  | 0    | 0    | 0.01538 | 88.62 |
| 342 | Paludibacter_OTU#464                | 0.05  | 0    | 0    | 0.01538 | 88.65 |
| 343 | Paludibacter_OTU#488                | 0.05  | 0    | 0    | 0.01538 | 88.68 |
| 344 | Limibacter_OTU#124                  | 0.05  | 0    | 0    | 0.01538 | 88.7  |
| 345 | Allobaculum_OTU#444                 | 0.05  | 0    | 0    | 0.01538 | 88.73 |
| 346 | Paludibacter_OTU#505                | 0.05  | 0    | 0    | 0.01538 | 88.76 |
| 347 | Allobaculum_OTU#397                 | 0.05  | 0    | 0    | 0.01538 | 88.79 |
| 348 | unclassified_Bacteroidetes_OTU#390  | 0.05  | 0    | 0    | 0.01538 | 88.81 |
| 349 | Calditerrivibrio_OTU#367            | 0.05  | 0    | 0    | 0.01538 | 88.84 |
| 350 | Paludibacter_OTU#350                | 0.05  | 0    | 0    | 0.01538 | 88.87 |
| 351 | Allobaculum_OTU#76                  | 0.05  | 0    | 0    | 0.01538 | 88.89 |
| 352 | Oscillibacter_OTU#1091              | 0     | 0.04 | 0    | 0.01385 | 88.92 |
| 353 | Robinsoniella_OTU#246               | 0     | 0.04 | 0    | 0.01385 | 88.94 |
| 354 | Blautia_OTU#284                     | 0     | 0.04 | 0    | 0.01385 | 88.97 |
| 355 | Robinsoniella_OTU#316               | 0     | 0.04 | 0    | 0.01385 | 88.99 |
| 356 | Barnesiella_OTU#179                 | 0     | 0.04 | 0    | 0.01385 | 89.01 |
| 357 | Marvinbryantia_OTU#1065             | 0     | 0.04 | 0    | 0.01385 | 89.04 |
| 358 | unclassified_Bacteroidetes_OTU#1052 | 0     | 0.04 | 0    | 0.01385 | 89.06 |
| 359 | unclassified_Clostridiales_OTU#1040 | 0     | 0.04 | 0    | 0.01385 | 89.09 |

Supplementary Table 4

|     |                                          |       |      |      |         |       |
|-----|------------------------------------------|-------|------|------|---------|-------|
| 360 | unclassified_Bacteroidales_OTU#904       | 0     | 0.04 | 0    | 0.01385 | 89.11 |
| 361 | Pseudozobellia_OTU#606                   | 0     | 0    | 0.04 | 0.01385 | 89.14 |
| 362 | unclassified_Porphyrromonadaceae_OTU#733 | 0     | 0    | 0.04 | 0.01385 | 89.16 |
| 363 | Catenibacterium_OTU#705                  | 0     | 0    | 0.04 | 0.01385 | 89.18 |
| 364 | Paludibacter_OTU#757                     | 0     | 0    | 0.04 | 0.01385 | 89.21 |
| 365 | Tannerella_OTU#739                       | 0     | 0    | 0.04 | 0.01385 | 89.23 |
| 366 | unclassified_Bacteroidales_OTU#688       | 0     | 0    | 0.04 | 0.01385 | 89.26 |
| 367 | Paludibacter_OTU#772                     | 0     | 0    | 0.04 | 0.01385 | 89.28 |
| 368 | Paludibacter_OTU#696                     | 0     | 0    | 0.04 | 0.01385 | 89.31 |
| 369 | Paludibacter_OTU#663                     | 0     | 0    | 0.04 | 0.01385 | 89.33 |
| 370 | Anaerophaga_OTU#605                      | 0     | 0    | 0.04 | 0.01385 | 89.35 |
| 371 | unclassified_Bacteroidales_OTU#583       | 0     | 0    | 0.04 | 0.01385 | 89.38 |
| 372 | Paludibacter_OTU#855                     | 0     | 0    | 0.04 | 0.01385 | 89.4  |
| 373 | Rikenella_OTU#730                        | 0     | 0    | 0.04 | 0.01385 | 89.43 |
| 374 | unclassified_Bacteroidales_OTU#698       | 0     | 0    | 0.04 | 0.01385 | 89.45 |
| 375 | unclassified_Bacteroidales_OTU#639       | 0     | 0    | 0.04 | 0.01385 | 89.48 |
| 376 | Anaerophaga_OTU#627                      | 0     | 0    | 0.04 | 0.01385 | 89.5  |
| 377 | Paludibacter_OTU#625                     | 0     | 0    | 0.04 | 0.01385 | 89.52 |
| 378 | Paludibacter_OTU#612                     | 0     | 0    | 0.04 | 0.01385 | 89.55 |
| 379 | Barnesiella_OTU#603                      | 0     | 0    | 0.04 | 0.01385 | 89.57 |
| 380 | unclassified_Bacteroidales_OTU#586       | 0     | 0    | 0.04 | 0.01385 | 89.6  |
| 381 | unclassified_Porphyrromonadaceae_OTU#830 | 0     | 0    | 0.04 | 0.01385 | 89.62 |
| 382 | Anaerostipes_OTU#808                     | 0     | 0    | 0.04 | 0.01385 | 89.65 |
| 383 | unclassified_Ruminococcaceae_OTU#243     | 0     | 0.04 | 0    | 0.01385 | 89.67 |
| 384 | Paludibacter_OTU#960                     | 0     | 0.04 | 0    | 0.01385 | 89.69 |
| 385 | Prevotella_OTU#287                       | 0     | 0.04 | 0    | 0.01385 | 89.72 |
| 386 | unclassified_Lachnospiraceae_OTU#234     | 0     | 0.04 | 0    | 0.01385 | 89.74 |
| 387 | Paludibacter_OTU#233                     | 0     | 0.04 | 0    | 0.01385 | 89.77 |
| 388 | Oscillibacter_OTU#289                    | 0     | 0.04 | 0    | 0.01385 | 89.79 |
| 389 | Papillibacter_OTU#1023                   | 0     | 0.04 | 0    | 0.01385 | 89.82 |
| 390 | Dorea_OTU#1050                           | 0     | 0.04 | 0    | 0.01385 | 89.84 |
| 391 | Paludibacter_OTU#953                     | 0     | 0.04 | 0    | 0.01385 | 89.86 |
| 392 | unclassified_Bacteroidales_OTU#987       | 0     | 0.04 | 0    | 0.01385 | 89.89 |
| 393 | Limibacter_OTU#295                       | 0     | 0.04 | 0    | 0.01384 | 89.91 |
| 394 | unclassified_Bacteroidales_OTU#931       | 0     | 0.04 | 0    | 0.01384 | 89.94 |
| 395 | Anaerophaga_OTU#898                      | 0     | 0.04 | 0    | 0.01384 | 89.96 |
| 396 | Parasutterella_OTU#899                   | 0     | 0.04 | 0    | 0.01384 | 89.99 |
| 397 | Paludibacter_OTU#918                     | 0     | 0.04 | 0    | 0.01384 | 90.01 |
| 398 | Roseburia_OTU#135                        | 0.025 | 0.02 | 0    | 0.01308 | 90.03 |
| 399 | Rikenella_OTU#54                         | 0.025 | 0.02 | 0    | 0.01308 | 90.06 |
| 400 | Dorea_OTU#398                            | 0.025 | 0.02 | 0    | 0.01308 | 90.08 |

|     |                                    |       |      |      |         |       |
|-----|------------------------------------|-------|------|------|---------|-------|
| 401 | Limibacter_OTU#368                 | 0.025 | 0.02 | 0    | 0.01308 | 90.1  |
| 402 | Paludibacter_OTU#479               | 0.025 | 0    | 0.02 | 0.01308 | 90.12 |
| 403 | Barnesiella_OTU#472                | 0.025 | 0    | 0.02 | 0.01308 | 90.15 |
| 404 | Paludibacter_OTU#433               | 0.025 | 0    | 0.02 | 0.01308 | 90.17 |
| 405 | unclassified_Bacteroidales_OTU#347 | 0.025 | 0    | 0.02 | 0.01308 | 90.19 |
| 406 | Paludibacter_OTU#514               | 0.025 | 0    | 0.02 | 0.01308 | 90.22 |
| 407 | Paludibacter_OTU#471               | 0.025 | 0    | 0.02 | 0.01308 | 90.24 |
| 408 | Paludibacter_OTU#454               | 0.025 | 0    | 0.02 | 0.01308 | 90.26 |
| 409 | Paludibacter_OTU#101               | 0.025 | 0    | 0.02 | 0.01308 | 90.29 |
| 410 | Paludibacter_OTU#149               | 0.025 | 0    | 0.02 | 0.01308 | 90.31 |
| 411 | Anaerophaga_OTU#47                 | 0.025 | 0    | 0.02 | 0.01308 | 90.33 |
| 412 | Paludibacter_OTU#93                | 0.025 | 0    | 0.02 | 0.01308 | 90.35 |
| 413 | unclassified_Bacteroidetes_OTU#369 | 0.025 | 0    | 0.02 | 0.01308 | 90.38 |
| 414 | Anaerophaga_OTU#83                 | 0.025 | 0    | 0.02 | 0.01308 | 90.4  |
| 415 | Paludibacter_OTU#155               | 0.025 | 0    | 0.02 | 0.01308 | 90.42 |
| 416 | Paludibacter_OTU#129               | 0.025 | 0    | 0.02 | 0.01308 | 90.45 |
| 417 | Paludibacter_OTU#27                | 0.025 | 0    | 0.02 | 0.01308 | 90.47 |
| 418 | Butyricoccus_OTU#98                | 0.025 | 0    | 0.02 | 0.01308 | 90.49 |
| 419 | Enterorhabdus_OTU#545              | 0.025 | 0    | 0.02 | 0.01308 | 90.51 |
| 420 | Blautia_OTU#214                    | 0.025 | 0.02 | 0    | 0.01308 | 90.54 |
| 421 | Robinsoniella_OTU#470              | 0.025 | 0.02 | 0    | 0.01308 | 90.56 |
| 422 | Roseburia_OTU#446                  | 0.025 | 0.02 | 0    | 0.01308 | 90.58 |
| 423 | unclassified_Bacteroidales_OTU#345 | 0.025 | 0.02 | 0    | 0.01308 | 90.61 |
| 424 | Paludibacter_OTU#549               | 0.025 | 0.02 | 0    | 0.01308 | 90.63 |
| 425 | Paludibacter_OTU#511               | 0.025 | 0.02 | 0    | 0.01308 | 90.65 |
| 426 | Barnesiella_OTU#36                 | 0.025 | 0.02 | 0    | 0.01308 | 90.68 |
| 427 | Paludibacter_OTU#502               | 0.025 | 0.02 | 0    | 0.01307 | 90.7  |
| 428 | Paludibacter_OTU#561               | 0.025 | 0.02 | 0    | 0.01307 | 90.72 |
| 429 | unclassified_Bacteroidales_OTU#532 | 0.025 | 0.02 | 0    | 0.01307 | 90.74 |
| 430 | Paludibacter_OTU#773               | 0     | 0.02 | 0.02 | 0.01231 | 90.77 |
| 431 | Limibacter_OTU#628                 | 0     | 0.02 | 0.02 | 0.01231 | 90.79 |
| 432 | Barnesiella_OTU#810                | 0     | 0.02 | 0.02 | 0.01231 | 90.81 |
| 433 | Paludibacter_OTU#814               | 0     | 0.02 | 0.02 | 0.01231 | 90.83 |
| 434 | Anaerotruncus_OTU#280              | 0     | 0.02 | 0.02 | 0.01231 | 90.85 |
| 435 | Limibacter_OTU#197                 | 0     | 0.02 | 0.02 | 0.01231 | 90.87 |
| 436 | unclassified_Bacteroidales_OTU#593 | 0     | 0.02 | 0.02 | 0.01231 | 90.9  |
| 437 | Barnesiella_OTU#230                | 0     | 0.02 | 0.02 | 0.01231 | 90.92 |
| 438 | Oscillibacter_OTU#570              | 0     | 0.02 | 0.02 | 0.01231 | 90.94 |
| 439 | Paludibacter_OTU#212               | 0     | 0.02 | 0.02 | 0.01231 | 90.96 |
| 440 | Paludibacter_OTU#775               | 0     | 0.02 | 0.02 | 0.01231 | 90.98 |
| 441 | Paludibacter_OTU#786               | 0     | 0.02 | 0.02 | 0.01231 | 91    |

|     |                                    |       |      |      |          |       |
|-----|------------------------------------|-------|------|------|----------|-------|
| 442 | Barnesiella_OTU#776                | 0     | 0.02 | 0.02 | 0.01231  | 91.02 |
| 443 | Barnesiella_OTU#771                | 0     | 0.02 | 0.02 | 0.01231  | 91.05 |
| 444 | Lachnobacterium_OTU#662            | 0     | 0.02 | 0.02 | 0.01231  | 91.07 |
| 445 | Paludibacter_OTU#661               | 0     | 0.02 | 0.02 | 0.01231  | 91.09 |
| 446 | Paludibacter_OTU#575               | 0     | 0.02 | 0.02 | 0.01231  | 91.11 |
| 447 | Anaerophaga_OTU#881                | 0     | 0.02 | 0.02 | 0.01231  | 91.13 |
| 448 | unclassified_Firmicutes_OTU#871    | 0     | 0.02 | 0.02 | 0.01231  | 91.15 |
| 449 | Paludibacter_OTU#717               | 0     | 0.02 | 0.02 | 0.01231  | 91.18 |
| 450 | unclassified_Clostridiales_OTU#693 | 0     | 0.02 | 0.02 | 0.01231  | 91.2  |
| 451 | Paludibacter_OTU#893               | 0     | 0.02 | 0.02 | 0.01231  | 91.22 |
| 452 | Paludibacter_OTU#880               | 0     | 0.02 | 0.02 | 0.01231  | 91.24 |
| 453 | Paludibacter_OTU#823               | 0     | 0.02 | 0.02 | 0.01231  | 91.26 |
| 454 | Barnesiella_OTU#309                | 0     | 0.02 | 0.02 | 0.01231  | 91.28 |
| 455 | Paludibacter_OTU#836               | 0     | 0.02 | 0.02 | 0.01231  | 91.31 |
| 456 | Paludibacter_OTU#764               | 0     | 0.02 | 0.02 | 0.01231  | 91.33 |
| 457 | Pseudozobellia_OTU#799             | 0     | 0.02 | 0.02 | 0.01231  | 91.35 |
| 458 | Paludibacter_OTU#883               | 0     | 0.02 | 0.02 | 0.01231  | 91.37 |
| 459 | Barnesiella_OTU#860                | 0     | 0.02 | 0.02 | 0.01231  | 91.39 |
| 460 | Paludibacter_OTU#887               | 0     | 0.02 | 0.02 | 0.01231  | 91.41 |
| 461 | Paludibacter_OTU#576               | 0     | 0.02 | 0.02 | 0.01231  | 91.43 |
| 462 | Paludibacter_OTU#710               | 0     | 0.02 | 0.02 | 0.01231  | 91.46 |
| 463 | Limibacter_OTU#463                 | 0.025 | 0    | 0    | 0.007692 | 91.47 |
| 464 | Allobaculum_OTU#504                | 0.025 | 0    | 0    | 0.007692 | 91.48 |
| 465 | Catenibacterium_OTU#500            | 0.025 | 0    | 0    | 0.007692 | 91.5  |
| 466 | Anaerophaga_OTU#496                | 0.025 | 0    | 0    | 0.007692 | 91.51 |
| 467 | Rikenella_OTU#494                  | 0.025 | 0    | 0    | 0.007692 | 91.52 |
| 468 | Rikenella_OTU#493                  | 0.025 | 0    | 0    | 0.007692 | 91.54 |
| 469 | Paludibacter_OTU#492               | 0.025 | 0    | 0    | 0.007692 | 91.55 |
| 470 | Barnesiella_OTU#475                | 0.025 | 0    | 0    | 0.007692 | 91.56 |
| 471 | Paludibacter_OTU#482               | 0.025 | 0    | 0    | 0.007692 | 91.58 |
| 472 | Limibacter_OTU#481                 | 0.025 | 0    | 0    | 0.007692 | 91.59 |
| 473 | Rikenella_OTU#480                  | 0.025 | 0    | 0    | 0.007692 | 91.6  |
| 474 | Allobaculum_OTU#478                | 0.025 | 0    | 0    | 0.007692 | 91.62 |
| 475 | Limibacter_OTU#477                 | 0.025 | 0    | 0    | 0.007692 | 91.63 |
| 476 | Limibacter_OTU#476                 | 0.025 | 0    | 0    | 0.007692 | 91.65 |
| 477 | Anaerophaga_OTU#485                | 0.025 | 0    | 0    | 0.007692 | 91.66 |
| 478 | Ruminococcus_OTU#491               | 0.025 | 0    | 0    | 0.007692 | 91.67 |
| 479 | Barnesiella_OTU#474                | 0.025 | 0    | 0    | 0.007692 | 91.69 |
| 480 | Barnesiella_OTU#473                | 0.025 | 0    | 0    | 0.007692 | 91.7  |
| 481 | Syntrophococcus_OTU#490            | 0.025 | 0    | 0    | 0.007692 | 91.71 |
| 482 | Paludibacter_OTU#495               | 0.025 | 0    | 0    | 0.007692 | 91.73 |

Supplementary Table 4



|     |                            |       |   |   |          |       |
|-----|----------------------------|-------|---|---|----------|-------|
| 483 | Barnesiella_OTU#468        | 0.025 | 0 | 0 | 0.007692 | 91.74 |
| 484 | Paludibacter_OTU#466       | 0.025 | 0 | 0 | 0.007692 | 91.75 |
| 485 | Paludibacter_OTU#484       | 0.025 | 0 | 0 | 0.007692 | 91.77 |
| 486 | Tannerella_OTU#465         | 0.025 | 0 | 0 | 0.007692 | 91.78 |
| 487 | Limibacter_OTU#461         | 0.025 | 0 | 0 | 0.007692 | 91.79 |
| 488 | Paludibacter_OTU#460       | 0.025 | 0 | 0 | 0.007692 | 91.81 |
| 489 | Anaerophaga_OTU#459        | 0.025 | 0 | 0 | 0.007692 | 91.82 |
| 490 | Barnesiella_OTU#458        | 0.025 | 0 | 0 | 0.007692 | 91.83 |
| 491 | Barnesiella_OTU#456        | 0.025 | 0 | 0 | 0.007692 | 91.85 |
| 492 | Paludibacter_OTU#455       | 0.025 | 0 | 0 | 0.007692 | 91.86 |
| 493 | Mucispirillum_OTU#452      | 0.025 | 0 | 0 | 0.007692 | 91.87 |
| 494 | Paludibacter_OTU#483       | 0.025 | 0 | 0 | 0.007692 | 91.89 |
| 495 | Barnesiella_OTU#451        | 0.025 | 0 | 0 | 0.007692 | 91.9  |
| 496 | Limibacter_OTU#450         | 0.025 | 0 | 0 | 0.007692 | 91.91 |
| 497 | Paludibacter_OTU#448       | 0.025 | 0 | 0 | 0.007692 | 91.93 |
| 498 | Limibacter_OTU#499         | 0.025 | 0 | 0 | 0.007692 | 91.94 |
| 499 | Anaerovorax_OTU#498        | 0.025 | 0 | 0 | 0.007692 | 91.96 |
| 500 | Barnesiella_OTU#441        | 0.025 | 0 | 0 | 0.007692 | 91.97 |
| 501 | Limibacter_OTU#437         | 0.025 | 0 | 0 | 0.007692 | 91.98 |
| 502 | Limibacter_OTU#436         | 0.025 | 0 | 0 | 0.007692 | 92    |
| 503 | Limibacter_OTU#434         | 0.025 | 0 | 0 | 0.007692 | 92.01 |
| 504 | Limibacter_OTU#438         | 0.025 | 0 | 0 | 0.007692 | 92.02 |
| 505 | Anaerophaga_OTU#442        | 0.025 | 0 | 0 | 0.007692 | 92.04 |
| 506 | Rikenella_OTU#431          | 0.025 | 0 | 0 | 0.007692 | 92.05 |
| 507 | Anaerophaga_OTU#430        | 0.025 | 0 | 0 | 0.007692 | 92.06 |
| 508 | Allobaculum_OTU#445        | 0.025 | 0 | 0 | 0.007692 | 92.08 |
| 509 | Limibacter_OTU#426         | 0.025 | 0 | 0 | 0.007692 | 92.09 |
| 510 | Paludibacter_OTU#425       | 0.025 | 0 | 0 | 0.007692 | 92.1  |
| 511 | Paludibacter_OTU#447       | 0.025 | 0 | 0 | 0.007692 | 92.12 |
| 512 | Parasporobacterium_OTU#439 | 0.025 | 0 | 0 | 0.007692 | 92.13 |
| 513 | Paludibacter_OTU#501       | 0.025 | 0 | 0 | 0.007692 | 92.14 |
| 514 | Rikenella_OTU#497          | 0.025 | 0 | 0 | 0.007692 | 92.16 |
| 515 | Rikenella_OTU#503          | 0.025 | 0 | 0 | 0.007692 | 92.17 |
| 516 | Barnesiella_OTU#126        | 0.025 | 0 | 0 | 0.007692 | 92.18 |
| 517 | Paraprevotella_OTU#61      | 0.025 | 0 | 0 | 0.007692 | 92.2  |
| 518 | Parasutterella_OTU#120     | 0.025 | 0 | 0 | 0.007692 | 92.21 |
| 519 | Limibacter_OTU#122         | 0.025 | 0 | 0 | 0.007692 | 92.23 |
| 520 | Paludibacter_OTU#69        | 0.025 | 0 | 0 | 0.007692 | 92.24 |
| 521 | Paludibacter_OTU#116       | 0.025 | 0 | 0 | 0.007692 | 92.25 |
| 522 | Barnesiella_OTU#140        | 0.025 | 0 | 0 | 0.007692 | 92.27 |
| 523 | Barnesiella_OTU#141        | 0.025 | 0 | 0 | 0.007692 | 92.28 |

|     |                              |       |   |   |          |       |
|-----|------------------------------|-------|---|---|----------|-------|
| 524 | Butyrivibrio_OTU#113         | 0.025 | 0 | 0 | 0.007692 | 92.29 |
| 525 | Paludibacter_OTU#109         | 0.025 | 0 | 0 | 0.007692 | 92.31 |
| 526 | Tannerella_OTU#51            | 0.025 | 0 | 0 | 0.007692 | 92.32 |
| 527 | Paludibacter_OTU#96          | 0.025 | 0 | 0 | 0.007692 | 92.33 |
| 528 | Limibacter_OTU#25            | 0.025 | 0 | 0 | 0.007692 | 92.35 |
| 529 | Barnesiella_OTU#95           | 0.025 | 0 | 0 | 0.007692 | 92.36 |
| 530 | Tannerella_OTU#94            | 0.025 | 0 | 0 | 0.007692 | 92.37 |
| 531 | Barnesiella_OTU#31           | 0.025 | 0 | 0 | 0.007692 | 92.39 |
| 532 | Barnesiella_OTU#88           | 0.025 | 0 | 0 | 0.007692 | 92.4  |
| 533 | Paludibacter_OTU#44          | 0.025 | 0 | 0 | 0.007692 | 92.41 |
| 534 | Allobaculum_OTU#85           | 0.025 | 0 | 0 | 0.007692 | 92.43 |
| 535 | Barnesiella_OTU#133          | 0.025 | 0 | 0 | 0.007692 | 92.44 |
| 536 | Barnesiella_OTU#167          | 0.025 | 0 | 0 | 0.007692 | 92.45 |
| 537 | Barnesiella_OTU#164          | 0.025 | 0 | 0 | 0.007692 | 92.47 |
| 538 | Anaerophaga_OTU#161          | 0.025 | 0 | 0 | 0.007692 | 92.48 |
| 539 | Barnesiella_OTU#20           | 0.025 | 0 | 0 | 0.007692 | 92.5  |
| 540 | Paludibacter_OTU#160         | 0.025 | 0 | 0 | 0.007692 | 92.51 |
| 541 | Barnesiella_OTU#159          | 0.025 | 0 | 0 | 0.007692 | 92.52 |
| 542 | Barnesiella_OTU#79           | 0.025 | 0 | 0 | 0.007692 | 92.54 |
| 543 | Paludibacter_OTU#78          | 0.025 | 0 | 0 | 0.007692 | 92.55 |
| 544 | Barnesiella_OTU#156          | 0.025 | 0 | 0 | 0.007692 | 92.56 |
| 545 | Rikenella_OTU#151            | 0.025 | 0 | 0 | 0.007692 | 92.58 |
| 546 | Olsenella_OTU#75             | 0.025 | 0 | 0 | 0.007692 | 92.59 |
| 547 | Tannerella_OTU#130           | 0.025 | 0 | 0 | 0.007692 | 92.6  |
| 548 | Paludibacter_OTU#74          | 0.025 | 0 | 0 | 0.007692 | 92.62 |
| 549 | Anaerophaga_OTU#137          | 0.025 | 0 | 0 | 0.007692 | 92.63 |
| 550 | Paludibacter_OTU#73          | 0.025 | 0 | 0 | 0.007692 | 92.64 |
| 551 | Escherichia/Shigella_OTU#146 | 0.025 | 0 | 0 | 0.007692 | 92.66 |
| 552 | Olsenella_OTU#145            | 0.025 | 0 | 0 | 0.007692 | 92.67 |
| 553 | Barnesiella_OTU#144          | 0.025 | 0 | 0 | 0.007692 | 92.68 |
| 554 | Paludibacter_OTU#65          | 0.025 | 0 | 0 | 0.007692 | 92.7  |
| 555 | Parasporobacterium_OTU#143   | 0.025 | 0 | 0 | 0.007692 | 92.71 |
| 556 | Paludibacter_OTU#68          | 0.025 | 0 | 0 | 0.007692 | 92.72 |
| 557 | Limibacter_OTU#128           | 0.025 | 0 | 0 | 0.007692 | 92.74 |
| 558 | Allobaculum_OTU#509          | 0.025 | 0 | 0 | 0.007692 | 92.75 |
| 559 | Rikenella_OTU#508            | 0.025 | 0 | 0 | 0.007692 | 92.76 |
| 560 | Asaccharobacter_OTU#506      | 0.025 | 0 | 0 | 0.007692 | 92.78 |
| 561 | Barnesiella_OTU#558          | 0.025 | 0 | 0 | 0.007692 | 92.79 |
| 562 | Anaerophaga_OTU#559          | 0.025 | 0 | 0 | 0.007692 | 92.81 |
| 563 | Anaerophaga_OTU#562          | 0.025 | 0 | 0 | 0.007692 | 92.82 |
| 564 | Barnesiella_OTU#424          | 0.025 | 0 | 0 | 0.007692 | 92.83 |

Supplementary Table 4

|     |                             |       |   |   |          |       |
|-----|-----------------------------|-------|---|---|----------|-------|
| 565 | Pseudozobellia_OTU#419      | 0.025 | 0 | 0 | 0.007692 | 92.85 |
| 566 | Acetanaerobacterium_OTU#418 | 0.025 | 0 | 0 | 0.007692 | 92.86 |
| 567 | Parasporobacterium_OTU#417  | 0.025 | 0 | 0 | 0.007692 | 92.87 |
| 568 | Allofustis_OTU#416          | 0.025 | 0 | 0 | 0.007692 | 92.89 |
| 569 | Lachnobacterium_OTU#415     | 0.025 | 0 | 0 | 0.007692 | 92.9  |
| 570 | Paludibacter_OTU#414        | 0.025 | 0 | 0 | 0.007692 | 92.91 |
| 571 | Paludibacter_OTU#413        | 0.025 | 0 | 0 | 0.007692 | 92.93 |
| 572 | Parasutterella_OTU#412      | 0.025 | 0 | 0 | 0.007692 | 92.94 |
| 573 | Paludibacter_OTU#411        | 0.025 | 0 | 0 | 0.007692 | 92.95 |
| 574 | Allobaculum_OTU#410         | 0.025 | 0 | 0 | 0.007692 | 92.97 |
| 575 | Tannerella_OTU#409          | 0.025 | 0 | 0 | 0.007692 | 92.98 |
| 576 | Paludibacter_OTU#408        | 0.025 | 0 | 0 | 0.007692 | 92.99 |
| 577 | Limibacter_OTU#407          | 0.025 | 0 | 0 | 0.007692 | 93.01 |
| 578 | Caminiella_OTU#406          | 0.025 | 0 | 0 | 0.007692 | 93.02 |
| 579 | Anaerophaga_OTU#405         | 0.025 | 0 | 0 | 0.007692 | 93.03 |
| 580 | Barnesiella_OTU#403         | 0.025 | 0 | 0 | 0.007692 | 93.05 |
| 581 | Paludibacter_OTU#402        | 0.025 | 0 | 0 | 0.007692 | 93.06 |
| 582 | Acetanaerobacterium_OTU#401 | 0.025 | 0 | 0 | 0.007692 | 93.08 |
| 583 | Limibacter_OTU#394          | 0.025 | 0 | 0 | 0.007692 | 93.09 |
| 584 | Paludibacter_OTU#392        | 0.025 | 0 | 0 | 0.007692 | 93.1  |
| 585 | Anaerophaga_OTU#388         | 0.025 | 0 | 0 | 0.007692 | 93.12 |
| 586 | Lawsonia_OTU#395            | 0.025 | 0 | 0 | 0.007692 | 93.13 |
| 587 | Paludibacter_OTU#387        | 0.025 | 0 | 0 | 0.007692 | 93.14 |
| 588 | Asaccharobacter_OTU#386     | 0.025 | 0 | 0 | 0.007692 | 93.16 |
| 589 | Anaerophaga_OTU#385         | 0.025 | 0 | 0 | 0.007692 | 93.17 |
| 590 | Paludibacter_OTU#384        | 0.025 | 0 | 0 | 0.007692 | 93.18 |
| 591 | Coprococcus_OTU#383         | 0.025 | 0 | 0 | 0.007692 | 93.2  |
| 592 | Lachnobacterium_OTU#382     | 0.025 | 0 | 0 | 0.007692 | 93.21 |
| 593 | Rikenella_OTU#381           | 0.025 | 0 | 0 | 0.007692 | 93.22 |
| 594 | Parasporobacterium_OTU#380  | 0.025 | 0 | 0 | 0.007692 | 93.24 |
| 595 | Paludibacter_OTU#379        | 0.025 | 0 | 0 | 0.007692 | 93.25 |
| 596 | Rikenella_OTU#377           | 0.025 | 0 | 0 | 0.007692 | 93.26 |
| 597 | Allobaculum_OTU#375         | 0.025 | 0 | 0 | 0.007692 | 93.28 |
| 598 | Rikenella_OTU#373           | 0.025 | 0 | 0 | 0.007692 | 93.29 |
| 599 | Lachnobacterium_OTU#372     | 0.025 | 0 | 0 | 0.007692 | 93.3  |
| 600 | Limibacter_OTU#370          | 0.025 | 0 | 0 | 0.007692 | 93.32 |
| 601 | Anaerotruncus_OTU#366       | 0.025 | 0 | 0 | 0.007692 | 93.33 |
| 602 | Lachnobacterium_OTU#364     | 0.025 | 0 | 0 | 0.007692 | 93.34 |
| 603 | Caminiella_OTU#361          | 0.025 | 0 | 0 | 0.007692 | 93.36 |
| 604 | Rikenella_OTU#360           | 0.025 | 0 | 0 | 0.007692 | 93.37 |
| 605 | Limibacter_OTU#359          | 0.025 | 0 | 0 | 0.007692 | 93.39 |

|     |                         |       |   |   |          |       |
|-----|-------------------------|-------|---|---|----------|-------|
| 606 | Coprococcus_OTU#358     | 0.025 | 0 | 0 | 0.007692 | 93.4  |
| 607 | Dorea_OTU#355           | 0.025 | 0 | 0 | 0.007692 | 93.41 |
| 608 | Allobaculum_OTU#353     | 0.025 | 0 | 0 | 0.007692 | 93.43 |
| 609 | Pseudozobellia_OTU#349  | 0.025 | 0 | 0 | 0.007692 | 93.44 |
| 610 | Limibacter_OTU#348      | 0.025 | 0 | 0 | 0.007692 | 93.45 |
| 611 | Paludibacter_OTU#344    | 0.025 | 0 | 0 | 0.007692 | 93.47 |
| 612 | Paludibacter_OTU#542    | 0.025 | 0 | 0 | 0.007692 | 93.48 |
| 613 | Anaerophaga_OTU#399     | 0.025 | 0 | 0 | 0.007692 | 93.49 |
| 614 | Paludibacter_OTU#517    | 0.025 | 0 | 0 | 0.007692 | 93.51 |
| 615 | Limibacter_OTU#560      | 0.025 | 0 | 0 | 0.007692 | 93.52 |
| 616 | Anaerophaga_OTU#556     | 0.025 | 0 | 0 | 0.007692 | 93.53 |
| 617 | Paludibacter_OTU#548    | 0.025 | 0 | 0 | 0.007692 | 93.55 |
| 618 | Rikenella_OTU#544       | 0.025 | 0 | 0 | 0.007692 | 93.56 |
| 619 | Limibacter_OTU#540      | 0.025 | 0 | 0 | 0.007692 | 93.57 |
| 620 | Anaerophaga_OTU#536     | 0.025 | 0 | 0 | 0.007692 | 93.59 |
| 621 | Tannerella_OTU#538      | 0.025 | 0 | 0 | 0.007692 | 93.6  |
| 622 | Paludibacter_OTU#534    | 0.025 | 0 | 0 | 0.007692 | 93.61 |
| 623 | Anaerophaga_OTU#539     | 0.025 | 0 | 0 | 0.007692 | 93.63 |
| 624 | Limibacter_OTU#533      | 0.025 | 0 | 0 | 0.007692 | 93.64 |
| 625 | Salinibacterium_OTU#537 | 0.025 | 0 | 0 | 0.007692 | 93.66 |
| 626 | Tannerella_OTU#531      | 0.025 | 0 | 0 | 0.007692 | 93.67 |
| 627 | Limibacter_OTU#530      | 0.025 | 0 | 0 | 0.007692 | 93.68 |
| 628 | Anaerophaga_OTU#541     | 0.025 | 0 | 0 | 0.007692 | 93.7  |
| 629 | Limibacter_OTU#529      | 0.025 | 0 | 0 | 0.007692 | 93.71 |
| 630 | Allobaculum_OTU#543     | 0.025 | 0 | 0 | 0.007692 | 93.72 |
| 631 | Paludibacter_OTU#546    | 0.025 | 0 | 0 | 0.007692 | 93.74 |
| 632 | Barnesiella_OTU#527     | 0.025 | 0 | 0 | 0.007692 | 93.75 |
| 633 | Rikenella_OTU#525       | 0.025 | 0 | 0 | 0.007692 | 93.76 |
| 634 | Paludibacter_OTU#547    | 0.025 | 0 | 0 | 0.007692 | 93.78 |
| 635 | Allobaculum_OTU#523     | 0.025 | 0 | 0 | 0.007692 | 93.79 |
| 636 | Paludibacter_OTU#522    | 0.025 | 0 | 0 | 0.007692 | 93.8  |
| 637 | Paludibacter_OTU#521    | 0.025 | 0 | 0 | 0.007692 | 93.82 |
| 638 | Limibacter_OTU#520      | 0.025 | 0 | 0 | 0.007692 | 93.83 |
| 639 | Allobaculum_OTU#535     | 0.025 | 0 | 0 | 0.007692 | 93.84 |
| 640 | Anaerophaga_OTU#518     | 0.025 | 0 | 0 | 0.007692 | 93.86 |
| 641 | Allobaculum_OTU#553     | 0.025 | 0 | 0 | 0.007692 | 93.87 |
| 642 | Lachnobacterium_OTU#554 | 0.025 | 0 | 0 | 0.007692 | 93.88 |
| 643 | Rikenella_OTU#516       | 0.025 | 0 | 0 | 0.007692 | 93.9  |
| 644 | Pseudozobellia_OTU#551  | 0.025 | 0 | 0 | 0.007692 | 93.91 |
| 645 | Paludibacter_OTU#515    | 0.025 | 0 | 0 | 0.007692 | 93.93 |
| 646 | Rikenella_OTU#555       | 0.025 | 0 | 0 | 0.007692 | 93.94 |

|     |                                   |       |      |   |          |       |
|-----|-----------------------------------|-------|------|---|----------|-------|
| 647 | Bradyrhizobium_OTU#513            | 0.025 | 0    | 0 | 0.007692 | 93.95 |
| 648 | Limibacter_OTU#512                | 0.025 | 0    | 0 | 0.007692 | 93.97 |
| 649 | Roseburia_OTU#1111                | 0     | 0.02 | 0 | 0.006927 | 93.98 |
| 650 | Paludibacter_OTU#1119             | 0     | 0.02 | 0 | 0.006927 | 93.99 |
| 651 | Anaerophaga_OTU#1123              | 0     | 0.02 | 0 | 0.006927 | 94    |
| 652 | Agromonas_OTU#1115                | 0     | 0.02 | 0 | 0.006927 | 94.01 |
| 653 | Faecalibacterium_OTU#1131         | 0     | 0.02 | 0 | 0.006927 | 94.03 |
| 654 | Rikenella_OTU#1127                | 0     | 0.02 | 0 | 0.006927 | 94.04 |
| 655 | Dorea_OTU#1137                    | 0     | 0.02 | 0 | 0.006927 | 94.05 |
| 656 | Pseudozobellia_OTU#1139           | 0     | 0.02 | 0 | 0.006927 | 94.06 |
| 657 | Anaerophaga_OTU#1135              | 0     | 0.02 | 0 | 0.006927 | 94.07 |
| 658 | Paludibacter_OTU#1143             | 0     | 0.02 | 0 | 0.006927 | 94.09 |
| 659 | Acetanaerobacterium_OTU#1144      | 0     | 0.02 | 0 | 0.006927 | 94.1  |
| 660 | Alkaliflexus_OTU#1142             | 0     | 0.02 | 0 | 0.006927 | 94.11 |
| 661 | Robinsoniella_OTU#1141            | 0     | 0.02 | 0 | 0.006927 | 94.12 |
| 662 | Paludibacter_OTU#1140             | 0     | 0.02 | 0 | 0.006927 | 94.14 |
| 663 | Butyrivibrio_OTU#1138             | 0     | 0.02 | 0 | 0.006927 | 94.15 |
| 664 | Oscillibacter_OTU#1136            | 0     | 0.02 | 0 | 0.006927 | 94.16 |
| 665 | Blautia_OTU#1134                  | 0     | 0.02 | 0 | 0.006927 | 94.17 |
| 666 | Anaerophaga_OTU#1133              | 0     | 0.02 | 0 | 0.006927 | 94.18 |
| 667 | Paludibacter_OTU#1132             | 0     | 0.02 | 0 | 0.006927 | 94.2  |
| 668 | Coprococcus_OTU#1130              | 0     | 0.02 | 0 | 0.006927 | 94.21 |
| 669 | Paludibacter_OTU#1129             | 0     | 0.02 | 0 | 0.006927 | 94.22 |
| 670 | Paraeggerthella_OTU#1128          | 0     | 0.02 | 0 | 0.006927 | 94.23 |
| 671 | Coprococcus_OTU#1126              | 0     | 0.02 | 0 | 0.006927 | 94.24 |
| 672 | Hydrogenoanaerobacterium_OTU#1125 | 0     | 0.02 | 0 | 0.006927 | 94.26 |
| 673 | Anaerophaga_OTU#1124              | 0     | 0.02 | 0 | 0.006927 | 94.27 |
| 674 | Sporobacterium_OTU#1122           | 0     | 0.02 | 0 | 0.006927 | 94.28 |
| 675 | Anaerophaga_OTU#1121              | 0     | 0.02 | 0 | 0.006927 | 94.29 |
| 676 | Pseudozobellia_OTU#1120           | 0     | 0.02 | 0 | 0.006927 | 94.31 |
| 677 | Anaerotruncus_OTU#1118            | 0     | 0.02 | 0 | 0.006927 | 94.32 |
| 678 | Robinsoniella_OTU#1117            | 0     | 0.02 | 0 | 0.006927 | 94.33 |
| 679 | Limibacter_OTU#1116               | 0     | 0.02 | 0 | 0.006927 | 94.34 |
| 680 | Limibacter_OTU#1114               | 0     | 0.02 | 0 | 0.006927 | 94.35 |
| 681 | Paludibacter_OTU#1113             | 0     | 0.02 | 0 | 0.006927 | 94.37 |
| 682 | Paludibacter_OTU#1112             | 0     | 0.02 | 0 | 0.006927 | 94.38 |
| 683 | Anaerophaga_OTU#1110              | 0     | 0.02 | 0 | 0.006927 | 94.39 |
| 684 | Robinsoniella_OTU#1109            | 0     | 0.02 | 0 | 0.006927 | 94.4  |
| 685 | Marvinbryantia_OTU#1108           | 0     | 0.02 | 0 | 0.006927 | 94.41 |
| 686 | Paludibacter_OTU#1106             | 0     | 0.02 | 0 | 0.006927 | 94.43 |
| 687 | Dorea_OTU#1105                    | 0     | 0.02 | 0 | 0.006927 | 94.44 |

|     |                          |   |      |      |          |       |
|-----|--------------------------|---|------|------|----------|-------|
| 688 | Paludibacter_OTU#1104    | 0 | 0.02 | 0    | 0.006927 | 94.45 |
| 689 | Paludibacter_OTU#1102    | 0 | 0.02 | 0    | 0.006927 | 94.46 |
| 690 | Anaerophaga_OTU#1101     | 0 | 0.02 | 0    | 0.006927 | 94.48 |
| 691 | Dorea_OTU#1100           | 0 | 0.02 | 0    | 0.006927 | 94.49 |
| 692 | Lachnobacterium_OTU#1098 | 0 | 0.02 | 0    | 0.006927 | 94.5  |
| 693 | Paludibacter_OTU#1097    | 0 | 0.02 | 0    | 0.006927 | 94.51 |
| 694 | Robinsoniella_OTU#1096   | 0 | 0.02 | 0    | 0.006927 | 94.52 |
| 695 | Barnesiella_OTU#1094     | 0 | 0.02 | 0    | 0.006927 | 94.54 |
| 696 | Paludibacter_OTU#1093    | 0 | 0.02 | 0    | 0.006927 | 94.55 |
| 697 | Barnesiella_OTU#1092     | 0 | 0.02 | 0    | 0.006927 | 94.56 |
| 698 | Barnesiella_OTU#1090     | 0 | 0.02 | 0    | 0.006927 | 94.57 |
| 699 | Butyricococcus_OTU#1089  | 0 | 0.02 | 0    | 0.006927 | 94.59 |
| 700 | Robinsoniella_OTU#1086   | 0 | 0.02 | 0    | 0.006927 | 94.6  |
| 701 | Barnesiella_OTU#1085     | 0 | 0.02 | 0    | 0.006927 | 94.61 |
| 702 | Sporobacter_OTU#1084     | 0 | 0.02 | 0    | 0.006927 | 94.62 |
| 703 | Coprococcus_OTU#1082     | 0 | 0.02 | 0    | 0.006927 | 94.63 |
| 704 | Marvinbryantia_OTU#1081  | 0 | 0.02 | 0    | 0.006927 | 94.65 |
| 705 | Coprococcus_OTU#1080     | 0 | 0.02 | 0    | 0.006927 | 94.66 |
| 706 | Anaerotruncus_OTU#1078   | 0 | 0.02 | 0    | 0.006927 | 94.67 |
| 707 | Anaerotruncus_OTU#1077   | 0 | 0.02 | 0    | 0.006927 | 94.68 |
| 708 | Anaerotruncus_OTU#1076   | 0 | 0.02 | 0    | 0.006927 | 94.69 |
| 709 | Anaerophaga_OTU#1075     | 0 | 0.02 | 0    | 0.006927 | 94.71 |
| 710 | Paraprevotella_OTU#1074  | 0 | 0.02 | 0    | 0.006927 | 94.72 |
| 711 | Howardella_OTU#1073      | 0 | 0.02 | 0    | 0.006927 | 94.73 |
| 712 | Paludibacter_OTU#1072    | 0 | 0.02 | 0    | 0.006927 | 94.74 |
| 713 | Acetitomaculum_OTU#1079  | 0 | 0.02 | 0    | 0.006927 | 94.76 |
| 714 | Acetitomaculum_OTU#1083  | 0 | 0.02 | 0    | 0.006927 | 94.77 |
| 715 | Marvinbryantia_OTU#1095  | 0 | 0.02 | 0    | 0.006927 | 94.78 |
| 716 | Robinsoniella_OTU#1103   | 0 | 0.02 | 0    | 0.006927 | 94.79 |
| 717 | Paludibacter_OTU#1087    | 0 | 0.02 | 0    | 0.006927 | 94.8  |
| 718 | Barnesiella_OTU#673      | 0 | 0    | 0.02 | 0.006923 | 94.82 |
| 719 | Paludibacter_OTU#672     | 0 | 0    | 0.02 | 0.006923 | 94.83 |
| 720 | Blautia_OTU#671          | 0 | 0    | 0.02 | 0.006923 | 94.84 |
| 721 | Anaerophaga_OTU#670      | 0 | 0    | 0.02 | 0.006923 | 94.85 |
| 722 | Tannerella_OTU#668       | 0 | 0    | 0.02 | 0.006923 | 94.86 |
| 723 | Barnesiella_OTU#667      | 0 | 0    | 0.02 | 0.006923 | 94.88 |
| 724 | Sporobacterium_OTU#666   | 0 | 0    | 0.02 | 0.006923 | 94.89 |
| 725 | Alistipes_OTU#665        | 0 | 0    | 0.02 | 0.006923 | 94.9  |
| 726 | Paludibacter_OTU#664     | 0 | 0    | 0.02 | 0.006923 | 94.91 |
| 727 | Tannerella_OTU#660       | 0 | 0    | 0.02 | 0.006923 | 94.93 |
| 728 | Marvinbryantia_OTU#659   | 0 | 0    | 0.02 | 0.006923 | 94.94 |

Supplementary Table 4

|     |                         |   |   |      |          |       |
|-----|-------------------------|---|---|------|----------|-------|
| 729 | Paludibacter_OTU#658    | 0 | 0 | 0.02 | 0.006923 | 94.95 |
| 730 | Paludibacter_OTU#657    | 0 | 0 | 0.02 | 0.006923 | 94.96 |
| 731 | Paludibacter_OTU#655    | 0 | 0 | 0.02 | 0.006923 | 94.97 |
| 732 | Paludibacter_OTU#654    | 0 | 0 | 0.02 | 0.006923 | 94.99 |
| 733 | Barnesiella_OTU#652     | 0 | 0 | 0.02 | 0.006923 | 95    |
| 734 | Oscillibacter_OTU#651   | 0 | 0 | 0.02 | 0.006923 | 95.01 |
| 735 | Lachnobacterium_OTU#650 | 0 | 0 | 0.02 | 0.006923 | 95.02 |
| 736 | Hallella_OTU#649        | 0 | 0 | 0.02 | 0.006923 | 95.03 |
| 737 | Paludibacter_OTU#648    | 0 | 0 | 0.02 | 0.006923 | 95.05 |
| 738 | Tannerella_OTU#647      | 0 | 0 | 0.02 | 0.006923 | 95.06 |
| 739 | Tannerella_OTU#645      | 0 | 0 | 0.02 | 0.006923 | 95.07 |
| 740 | Lachnobacterium_OTU#638 | 0 | 0 | 0.02 | 0.006923 | 95.08 |
| 741 | Barnesiella_OTU#637     | 0 | 0 | 0.02 | 0.006923 | 95.1  |
| 742 | Tannerella_OTU#636      | 0 | 0 | 0.02 | 0.006923 | 95.11 |
| 743 | Anaerophaga_OTU#635     | 0 | 0 | 0.02 | 0.006923 | 95.12 |
| 744 | Roseburia_OTU#634       | 0 | 0 | 0.02 | 0.006923 | 95.13 |
| 745 | Paludibacter_OTU#633    | 0 | 0 | 0.02 | 0.006923 | 95.14 |
| 746 | Robinsoniella_OTU#632   | 0 | 0 | 0.02 | 0.006923 | 95.16 |
| 747 | Butyricococcus_OTU#631  | 0 | 0 | 0.02 | 0.006923 | 95.17 |
| 748 | Barnesiella_OTU#630     | 0 | 0 | 0.02 | 0.006923 | 95.18 |
| 749 | Anaerophaga_OTU#629     | 0 | 0 | 0.02 | 0.006923 | 95.19 |
| 750 | Papillibacter_OTU#624   | 0 | 0 | 0.02 | 0.006923 | 95.2  |
| 751 | Anaerophaga_OTU#621     | 0 | 0 | 0.02 | 0.006923 | 95.22 |
| 752 | Tannerella_OTU#619      | 0 | 0 | 0.02 | 0.006923 | 95.23 |
| 753 | Turicibacter_OTU#618    | 0 | 0 | 0.02 | 0.006923 | 95.24 |
| 754 | Lachnobacterium_OTU#615 | 0 | 0 | 0.02 | 0.006923 | 95.25 |
| 755 | Tannerella_OTU#613      | 0 | 0 | 0.02 | 0.006923 | 95.27 |
| 756 | Paludibacter_OTU#609    | 0 | 0 | 0.02 | 0.006923 | 95.28 |
| 757 | Barnesiella_OTU#607     | 0 | 0 | 0.02 | 0.006923 | 95.29 |
| 758 | Marvinbryantia_OTU#601  | 0 | 0 | 0.02 | 0.006923 | 95.3  |
| 759 | Barnesiella_OTU#599     | 0 | 0 | 0.02 | 0.006923 | 95.31 |
| 760 | Alistipes_OTU#594       | 0 | 0 | 0.02 | 0.006923 | 95.33 |
| 761 | Limibacter_OTU#591      | 0 | 0 | 0.02 | 0.006923 | 95.34 |
| 762 | Paludibacter_OTU#588    | 0 | 0 | 0.02 | 0.006923 | 95.35 |
| 763 | Paludibacter_OTU#585    | 0 | 0 | 0.02 | 0.006923 | 95.36 |
| 764 | Barnesiella_OTU#582     | 0 | 0 | 0.02 | 0.006923 | 95.37 |
| 765 | Parasutterella_OTU#578  | 0 | 0 | 0.02 | 0.006923 | 95.39 |
| 766 | Proteiniphilum_OTU#572  | 0 | 0 | 0.02 | 0.006923 | 95.4  |
| 767 | Rikenella_OTU#569       | 0 | 0 | 0.02 | 0.006923 | 95.41 |
| 768 | Paludibacter_OTU#568    | 0 | 0 | 0.02 | 0.006923 | 95.42 |
| 769 | Butyrivibrio_OTU#565    | 0 | 0 | 0.02 | 0.006923 | 95.44 |

|     |                         |   |   |      |          |       |
|-----|-------------------------|---|---|------|----------|-------|
| 770 | Anaerophaga_OTU#803     | 0 | 0 | 0.02 | 0.006923 | 95.45 |
| 771 | Paludibacter_OTU#802    | 0 | 0 | 0.02 | 0.006923 | 95.46 |
| 772 | Barnesiella_OTU#801     | 0 | 0 | 0.02 | 0.006923 | 95.47 |
| 773 | Paludibacter_OTU#800    | 0 | 0 | 0.02 | 0.006923 | 95.48 |
| 774 | Paludibacter_OTU#798    | 0 | 0 | 0.02 | 0.006923 | 95.5  |
| 775 | Paludibacter_OTU#797    | 0 | 0 | 0.02 | 0.006923 | 95.51 |
| 776 | Paludibacter_OTU#796    | 0 | 0 | 0.02 | 0.006923 | 95.52 |
| 777 | Barnesiella_OTU#794     | 0 | 0 | 0.02 | 0.006923 | 95.53 |
| 778 | Marvinbryantia_OTU#793  | 0 | 0 | 0.02 | 0.006923 | 95.54 |
| 779 | Tannerella_OTU#792      | 0 | 0 | 0.02 | 0.006923 | 95.56 |
| 780 | Anaerophaga_OTU#790     | 0 | 0 | 0.02 | 0.006923 | 95.57 |
| 781 | Paludibacter_OTU#789    | 0 | 0 | 0.02 | 0.006923 | 95.58 |
| 782 | Lactobacillus_OTU#787   | 0 | 0 | 0.02 | 0.006923 | 95.59 |
| 783 | Paludibacter_OTU#785    | 0 | 0 | 0.02 | 0.006923 | 95.61 |
| 784 | Paludibacter_OTU#783    | 0 | 0 | 0.02 | 0.006923 | 95.62 |
| 785 | Barnesiella_OTU#782     | 0 | 0 | 0.02 | 0.006923 | 95.63 |
| 786 | Paludibacter_OTU#781    | 0 | 0 | 0.02 | 0.006923 | 95.64 |
| 787 | Paludibacter_OTU#780    | 0 | 0 | 0.02 | 0.006923 | 95.65 |
| 788 | Rikenella_OTU#779       | 0 | 0 | 0.02 | 0.006923 | 95.67 |
| 789 | Hallella_OTU#778        | 0 | 0 | 0.02 | 0.006923 | 95.68 |
| 790 | Paludibacter_OTU#791    | 0 | 0 | 0.02 | 0.006923 | 95.69 |
| 791 | Limibacter_OTU#777      | 0 | 0 | 0.02 | 0.006923 | 95.7  |
| 792 | Anaerophaga_OTU#774     | 0 | 0 | 0.02 | 0.006923 | 95.71 |
| 793 | Rikenella_OTU#770       | 0 | 0 | 0.02 | 0.006923 | 95.73 |
| 794 | Paludibacter_OTU#795    | 0 | 0 | 0.02 | 0.006923 | 95.74 |
| 795 | Limibacter_OTU#768      | 0 | 0 | 0.02 | 0.006923 | 95.75 |
| 796 | Paludibacter_OTU#767    | 0 | 0 | 0.02 | 0.006923 | 95.76 |
| 797 | Barnesiella_OTU#766     | 0 | 0 | 0.02 | 0.006923 | 95.77 |
| 798 | Paludibacter_OTU#765    | 0 | 0 | 0.02 | 0.006923 | 95.79 |
| 799 | Paludibacter_OTU#763    | 0 | 0 | 0.02 | 0.006923 | 95.8  |
| 800 | Barnesiella_OTU#762     | 0 | 0 | 0.02 | 0.006923 | 95.81 |
| 801 | Paludibacter_OTU#761    | 0 | 0 | 0.02 | 0.006923 | 95.82 |
| 802 | Barnesiella_OTU#760     | 0 | 0 | 0.02 | 0.006923 | 95.84 |
| 803 | Paludibacter_OTU#759    | 0 | 0 | 0.02 | 0.006923 | 95.85 |
| 804 | Paludibacter_OTU#758    | 0 | 0 | 0.02 | 0.006923 | 95.86 |
| 805 | Aminiphilus_OTU#754     | 0 | 0 | 0.02 | 0.006923 | 95.87 |
| 806 | Paludibacter_OTU#753    | 0 | 0 | 0.02 | 0.006923 | 95.88 |
| 807 | Paludibacter_OTU#752    | 0 | 0 | 0.02 | 0.006923 | 95.9  |
| 808 | Rikenella_OTU#751       | 0 | 0 | 0.02 | 0.006923 | 95.91 |
| 809 | Tannerella_OTU#750      | 0 | 0 | 0.02 | 0.006923 | 95.92 |
| 810 | Parabacteroides_OTU#749 | 0 | 0 | 0.02 | 0.006923 | 95.93 |



|     |                      |   |   |      |          |       |
|-----|----------------------|---|---|------|----------|-------|
| 811 | Anaerophaga_OTU#748  | 0 | 0 | 0.02 | 0.006923 | 95.94 |
| 812 | Paludibacter_OTU#747 | 0 | 0 | 0.02 | 0.006923 | 95.96 |
| 813 | Paludibacter_OTU#746 | 0 | 0 | 0.02 | 0.006923 | 95.97 |
| 814 | Limibacter_OTU#743   | 0 | 0 | 0.02 | 0.006923 | 95.98 |
| 815 | Paludibacter_OTU#742 | 0 | 0 | 0.02 | 0.006923 | 95.99 |
| 816 | Paludibacter_OTU#741 | 0 | 0 | 0.02 | 0.006923 | 96.01 |
| 817 | Paludibacter_OTU#738 | 0 | 0 | 0.02 | 0.006923 | 96.02 |
| 818 | Paludibacter_OTU#737 | 0 | 0 | 0.02 | 0.006923 | 96.03 |
| 819 | Paludibacter_OTU#736 | 0 | 0 | 0.02 | 0.006923 | 96.04 |
| 820 | Anaerophaga_OTU#735  | 0 | 0 | 0.02 | 0.006923 | 96.05 |
| 821 | Paludibacter_OTU#734 | 0 | 0 | 0.02 | 0.006923 | 96.07 |
| 822 | Anaerophaga_OTU#731  | 0 | 0 | 0.02 | 0.006923 | 96.08 |
| 823 | Anaerophaga_OTU#728  | 0 | 0 | 0.02 | 0.006923 | 96.09 |
| 824 | Barnesiella_OTU#727  | 0 | 0 | 0.02 | 0.006923 | 96.1  |
| 825 | Anaerophaga_OTU#725  | 0 | 0 | 0.02 | 0.006923 | 96.11 |
| 826 | Barnesiella_OTU#723  | 0 | 0 | 0.02 | 0.006923 | 96.13 |
| 827 | Paludibacter_OTU#722 | 0 | 0 | 0.02 | 0.006923 | 96.14 |
| 828 | Tannerella_OTU#720   | 0 | 0 | 0.02 | 0.006923 | 96.15 |
| 829 | Anaerophaga_OTU#718  | 0 | 0 | 0.02 | 0.006923 | 96.16 |
| 830 | Paludibacter_OTU#716 | 0 | 0 | 0.02 | 0.006923 | 96.18 |
| 831 | Paludibacter_OTU#712 | 0 | 0 | 0.02 | 0.006923 | 96.19 |
| 832 | Sharpea_OTU#711      | 0 | 0 | 0.02 | 0.006923 | 96.2  |
| 833 | Tannerella_OTU#709   | 0 | 0 | 0.02 | 0.006923 | 96.21 |
| 834 | Tannerella_OTU#708   | 0 | 0 | 0.02 | 0.006923 | 96.22 |
| 835 | Paludibacter_OTU#706 | 0 | 0 | 0.02 | 0.006923 | 96.24 |
| 836 | Anaerophaga_OTU#704  | 0 | 0 | 0.02 | 0.006923 | 96.25 |
| 837 | Anaerophaga_OTU#703  | 0 | 0 | 0.02 | 0.006923 | 96.26 |
| 838 | Paludibacter_OTU#702 | 0 | 0 | 0.02 | 0.006923 | 96.27 |
| 839 | Paludibacter_OTU#701 | 0 | 0 | 0.02 | 0.006923 | 96.28 |
| 840 | Rikenella_OTU#700    | 0 | 0 | 0.02 | 0.006923 | 96.3  |
| 841 | Paludibacter_OTU#699 | 0 | 0 | 0.02 | 0.006923 | 96.31 |
| 842 | Turicibacter_OTU#697 | 0 | 0 | 0.02 | 0.006923 | 96.32 |
| 843 | Paludibacter_OTU#695 | 0 | 0 | 0.02 | 0.006923 | 96.33 |
| 844 | Paludibacter_OTU#694 | 0 | 0 | 0.02 | 0.006923 | 96.35 |
| 845 | Paludibacter_OTU#690 | 0 | 0 | 0.02 | 0.006923 | 96.36 |
| 846 | Paludibacter_OTU#689 | 0 | 0 | 0.02 | 0.006923 | 96.37 |
| 847 | Tannerella_OTU#686   | 0 | 0 | 0.02 | 0.006923 | 96.38 |
| 848 | Limibacter_OTU#683   | 0 | 0 | 0.02 | 0.006923 | 96.39 |
| 849 | Tannerella_OTU#682   | 0 | 0 | 0.02 | 0.006923 | 96.41 |
| 850 | Paludibacter_OTU#679 | 0 | 0 | 0.02 | 0.006923 | 96.42 |
| 851 | Brochothrix_OTU#676  | 0 | 0 | 0.02 | 0.006923 | 96.43 |

|     |                       |   |   |      |          |       |
|-----|-----------------------|---|---|------|----------|-------|
| 852 | Barnesiella_OTU#675   | 0 | 0 | 0.02 | 0.006923 | 96.44 |
| 853 | Anaerophaga_OTU#896   | 0 | 0 | 0.02 | 0.006923 | 96.45 |
| 854 | Tannerella_OTU#894    | 0 | 0 | 0.02 | 0.006923 | 96.47 |
| 855 | Paludibacter_OTU#892  | 0 | 0 | 0.02 | 0.006923 | 96.48 |
| 856 | Paludibacter_OTU#890  | 0 | 0 | 0.02 | 0.006923 | 96.49 |
| 857 | Limibacter_OTU#889    | 0 | 0 | 0.02 | 0.006923 | 96.5  |
| 858 | Barnesiella_OTU#888   | 0 | 0 | 0.02 | 0.006923 | 96.52 |
| 859 | Tannerella_OTU#886    | 0 | 0 | 0.02 | 0.006923 | 96.53 |
| 860 | Barnesiella_OTU#885   | 0 | 0 | 0.02 | 0.006923 | 96.54 |
| 861 | Paludibacter_OTU#884  | 0 | 0 | 0.02 | 0.006923 | 96.55 |
| 862 | Allobaculum_OTU#882   | 0 | 0 | 0.02 | 0.006923 | 96.56 |
| 863 | Barnesiella_OTU#878   | 0 | 0 | 0.02 | 0.006923 | 96.58 |
| 864 | Paludibacter_OTU#877  | 0 | 0 | 0.02 | 0.006923 | 96.59 |
| 865 | Limibacter_OTU#876    | 0 | 0 | 0.02 | 0.006923 | 96.6  |
| 866 | Paludibacter_OTU#874  | 0 | 0 | 0.02 | 0.006923 | 96.61 |
| 867 | Rikenella_OTU#873     | 0 | 0 | 0.02 | 0.006923 | 96.62 |
| 868 | Barnesiella_OTU#872   | 0 | 0 | 0.02 | 0.006923 | 96.64 |
| 869 | Barnesiella_OTU#870   | 0 | 0 | 0.02 | 0.006923 | 96.65 |
| 870 | Lactobacillus_OTU#869 | 0 | 0 | 0.02 | 0.006923 | 96.66 |
| 871 | Paludibacter_OTU#867  | 0 | 0 | 0.02 | 0.006923 | 96.67 |
| 872 | Paludibacter_OTU#865  | 0 | 0 | 0.02 | 0.006923 | 96.69 |
| 873 | Aquiflexum_OTU#863    | 0 | 0 | 0.02 | 0.006923 | 96.7  |
| 874 | Paludibacter_OTU#875  | 0 | 0 | 0.02 | 0.006923 | 96.71 |
| 875 | Paludibacter_OTU#862  | 0 | 0 | 0.02 | 0.006923 | 96.72 |
| 876 | Paludibacter_OTU#861  | 0 | 0 | 0.02 | 0.006923 | 96.73 |
| 877 | Barnesiella_OTU#858   | 0 | 0 | 0.02 | 0.006923 | 96.75 |
| 878 | Limibacter_OTU#879    | 0 | 0 | 0.02 | 0.006923 | 96.76 |
| 879 | Paludibacter_OTU#857  | 0 | 0 | 0.02 | 0.006923 | 96.77 |
| 880 | Barnesiella_OTU#856   | 0 | 0 | 0.02 | 0.006923 | 96.78 |
| 881 | Tannerella_OTU#891    | 0 | 0 | 0.02 | 0.006923 | 96.79 |
| 882 | Tannerella_OTU#895    | 0 | 0 | 0.02 | 0.006923 | 96.81 |
| 883 | Dorea_OTU#854         | 0 | 0 | 0.02 | 0.006923 | 96.82 |
| 884 | Adlercreutzia_OTU#853 | 0 | 0 | 0.02 | 0.006923 | 96.83 |
| 885 | Limibacter_OTU#852    | 0 | 0 | 0.02 | 0.006923 | 96.84 |
| 886 | Paludibacter_OTU#851  | 0 | 0 | 0.02 | 0.006923 | 96.86 |
| 887 | Limibacter_OTU#850    | 0 | 0 | 0.02 | 0.006923 | 96.87 |
| 888 | Tannerella_OTU#849    | 0 | 0 | 0.02 | 0.006923 | 96.88 |
| 889 | Paludibacter_OTU#848  | 0 | 0 | 0.02 | 0.006923 | 96.89 |
| 890 | Anaerophaga_OTU#847   | 0 | 0 | 0.02 | 0.006923 | 96.9  |
| 891 | Rikenella_OTU#845     | 0 | 0 | 0.02 | 0.006923 | 96.92 |
| 892 | Barnesiella_OTU#844   | 0 | 0 | 0.02 | 0.006923 | 96.93 |

|     |                         |   |      |      |          |       |
|-----|-------------------------|---|------|------|----------|-------|
| 893 | Anaerophaga_OTU#843     | 0 | 0    | 0.02 | 0.006923 | 96.94 |
| 894 | Anaerophaga_OTU#842     | 0 | 0    | 0.02 | 0.006923 | 96.95 |
| 895 | Paludibacter_OTU#841    | 0 | 0    | 0.02 | 0.006923 | 96.96 |
| 896 | Anaerophaga_OTU#840     | 0 | 0    | 0.02 | 0.006923 | 96.98 |
| 897 | Paludibacter_OTU#839    | 0 | 0    | 0.02 | 0.006923 | 96.99 |
| 898 | Paludibacter_OTU#838    | 0 | 0    | 0.02 | 0.006923 | 97    |
| 899 | Paludibacter_OTU#835    | 0 | 0    | 0.02 | 0.006923 | 97.01 |
| 900 | Rikenella_OTU#834       | 0 | 0    | 0.02 | 0.006923 | 97.03 |
| 901 | Paludibacter_OTU#833    | 0 | 0    | 0.02 | 0.006923 | 97.04 |
| 902 | Barnesiella_OTU#832     | 0 | 0    | 0.02 | 0.006923 | 97.05 |
| 903 | Paludibacter_OTU#831    | 0 | 0    | 0.02 | 0.006923 | 97.06 |
| 904 | Paludibacter_OTU#829    | 0 | 0    | 0.02 | 0.006923 | 97.07 |
| 905 | Paludibacter_OTU#827    | 0 | 0    | 0.02 | 0.006923 | 97.09 |
| 906 | Limibacter_OTU#825      | 0 | 0    | 0.02 | 0.006923 | 97.1  |
| 907 | Paludibacter_OTU#822    | 0 | 0    | 0.02 | 0.006923 | 97.11 |
| 908 | Paludibacter_OTU#820    | 0 | 0    | 0.02 | 0.006923 | 97.12 |
| 909 | Anaerophaga_OTU#819     | 0 | 0    | 0.02 | 0.006923 | 97.13 |
| 910 | Anaerophaga_OTU#818     | 0 | 0    | 0.02 | 0.006923 | 97.15 |
| 911 | Paludibacter_OTU#817    | 0 | 0    | 0.02 | 0.006923 | 97.16 |
| 912 | Paludibacter_OTU#815    | 0 | 0    | 0.02 | 0.006923 | 97.17 |
| 913 | Anaerophaga_OTU#812     | 0 | 0    | 0.02 | 0.006923 | 97.18 |
| 914 | Anaerophaga_OTU#811     | 0 | 0    | 0.02 | 0.006923 | 97.2  |
| 915 | Paludibacter_OTU#807    | 0 | 0    | 0.02 | 0.006923 | 97.21 |
| 916 | Barnesiella_OTU#806     | 0 | 0    | 0.02 | 0.006923 | 97.22 |
| 917 | Barnesiella_OTU#805     | 0 | 0    | 0.02 | 0.006923 | 97.23 |
| 918 | Barnesiella_OTU#804     | 0 | 0    | 0.02 | 0.006923 | 97.24 |
| 919 | Paludibacter_OTU#1012   | 0 | 0.02 | 0    | 0.006923 | 97.26 |
| 920 | Paludibacter_OTU#1011   | 0 | 0.02 | 0    | 0.006923 | 97.27 |
| 921 | Barnesiella_OTU#1010    | 0 | 0.02 | 0    | 0.006923 | 97.28 |
| 922 | Rikenella_OTU#1009      | 0 | 0.02 | 0    | 0.006923 | 97.29 |
| 923 | Paludibacter_OTU#1008   | 0 | 0.02 | 0    | 0.006923 | 97.3  |
| 924 | Rikenella_OTU#1006      | 0 | 0.02 | 0    | 0.006923 | 97.32 |
| 925 | Tannerella_OTU#1005     | 0 | 0.02 | 0    | 0.006923 | 97.33 |
| 926 | Butyrivibrio_OTU#1004   | 0 | 0.02 | 0    | 0.006923 | 97.34 |
| 927 | Proteiniphilum_OTU#1002 | 0 | 0.02 | 0    | 0.006923 | 97.35 |
| 928 | Limibacter_OTU#1001     | 0 | 0.02 | 0    | 0.006923 | 97.37 |
| 929 | Barnesiella_OTU#1000    | 0 | 0.02 | 0    | 0.006923 | 97.38 |
| 930 | Dorea_OTU#998           | 0 | 0.02 | 0    | 0.006923 | 97.39 |
| 931 | Craurococcus_OTU#996    | 0 | 0.02 | 0    | 0.006923 | 97.4  |
| 932 | Robinsoniella_OTU#249   | 0 | 0.02 | 0    | 0.006923 | 97.41 |
| 933 | Barnesiella_OTU#995     | 0 | 0.02 | 0    | 0.006923 | 97.43 |

Supplementary Table 4

|     |                             |   |      |   |          |       |
|-----|-----------------------------|---|------|---|----------|-------|
| 934 | Paludibacter_OTU#994        | 0 | 0.02 | 0 | 0.006923 | 97.44 |
| 935 | Paludibacter_OTU#993        | 0 | 0.02 | 0 | 0.006923 | 97.45 |
| 936 | Tannerella_OTU#992          | 0 | 0.02 | 0 | 0.006923 | 97.46 |
| 937 | Butyrivicoccus_OTU#248      | 0 | 0.02 | 0 | 0.006923 | 97.47 |
| 938 | Paludibacter_OTU#990        | 0 | 0.02 | 0 | 0.006923 | 97.49 |
| 939 | Paludibacter_OTU#988        | 0 | 0.02 | 0 | 0.006923 | 97.5  |
| 940 | Paludibacter_OTU#986        | 0 | 0.02 | 0 | 0.006923 | 97.51 |
| 941 | Acetanaerobacterium_OTU#985 | 0 | 0.02 | 0 | 0.006923 | 97.52 |
| 942 | Barnesiella_OTU#982         | 0 | 0.02 | 0 | 0.006923 | 97.54 |
| 943 | Barnesiella_OTU#981         | 0 | 0.02 | 0 | 0.006923 | 97.55 |
| 944 | Barnesiella_OTU#980         | 0 | 0.02 | 0 | 0.006923 | 97.56 |
| 945 | Barnesiella_OTU#978         | 0 | 0.02 | 0 | 0.006923 | 97.57 |
| 946 | Paludibacter_OTU#977        | 0 | 0.02 | 0 | 0.006923 | 97.58 |
| 947 | Paludibacter_OTU#976        | 0 | 0.02 | 0 | 0.006923 | 97.6  |
| 948 | Coprococcus_OTU#244         | 0 | 0.02 | 0 | 0.006923 | 97.61 |
| 949 | Tannerella_OTU#974          | 0 | 0.02 | 0 | 0.006923 | 97.62 |
| 950 | Barnesiella_OTU#973         | 0 | 0.02 | 0 | 0.006923 | 97.63 |
| 951 | Barnesiella_OTU#972         | 0 | 0.02 | 0 | 0.006923 | 97.64 |
| 952 | Paludibacter_OTU#970        | 0 | 0.02 | 0 | 0.006923 | 97.66 |
| 953 | Barnesiella_OTU#969         | 0 | 0.02 | 0 | 0.006923 | 97.67 |
| 954 | Tannerella_OTU#968          | 0 | 0.02 | 0 | 0.006923 | 97.68 |
| 955 | Coprococcus_OTU#242         | 0 | 0.02 | 0 | 0.006923 | 97.69 |
| 956 | Paludibacter_OTU#966        | 0 | 0.02 | 0 | 0.006923 | 97.71 |
| 957 | Belliella_OTU#965           | 0 | 0.02 | 0 | 0.006923 | 97.72 |
| 958 | Paludibacter_OTU#964        | 0 | 0.02 | 0 | 0.006923 | 97.73 |
| 959 | Paludibacter_OTU#963        | 0 | 0.02 | 0 | 0.006923 | 97.74 |
| 960 | Limibacter_OTU#962          | 0 | 0.02 | 0 | 0.006923 | 97.75 |
| 961 | Paludibacter_OTU#961        | 0 | 0.02 | 0 | 0.006923 | 97.77 |
| 962 | Dorea_OTU#240               | 0 | 0.02 | 0 | 0.006923 | 97.78 |
| 963 | Aquiflexum_OTU#959          | 0 | 0.02 | 0 | 0.006923 | 97.79 |
| 964 | Paludibacter_OTU#958        | 0 | 0.02 | 0 | 0.006923 | 97.8  |
| 965 | Paludibacter_OTU#956        | 0 | 0.02 | 0 | 0.006923 | 97.81 |
| 966 | Paludibacter_OTU#967        | 0 | 0.02 | 0 | 0.006923 | 97.83 |
| 967 | Anaerophaga_OTU#239         | 0 | 0.02 | 0 | 0.006923 | 97.84 |
| 968 | Barnesiella_OTU#955         | 0 | 0.02 | 0 | 0.006923 | 97.85 |
| 969 | Paludibacter_OTU#954        | 0 | 0.02 | 0 | 0.006923 | 97.86 |
| 970 | Barnesiella_OTU#971         | 0 | 0.02 | 0 | 0.006923 | 97.88 |
| 971 | Barnesiella_OTU#952         | 0 | 0.02 | 0 | 0.006923 | 97.89 |
| 972 | Paludibacter_OTU#951        | 0 | 0.02 | 0 | 0.006923 | 97.9  |
| 973 | Paludibacter_OTU#950        | 0 | 0.02 | 0 | 0.006923 | 97.91 |
| 974 | Paludibacter_OTU#975        | 0 | 0.02 | 0 | 0.006923 | 97.92 |

Supplementary Table 4

|      |                                  |   |      |   |          |       |
|------|----------------------------------|---|------|---|----------|-------|
| 975  | Limibacter_OTU#949               | 0 | 0.02 | 0 | 0.006923 | 97.94 |
| 976  | Paludibacter_OTU#948             | 0 | 0.02 | 0 | 0.006923 | 97.95 |
| 977  | Paludibacter_OTU#947             | 0 | 0.02 | 0 | 0.006923 | 97.96 |
| 978  | Tannerella_OTU#979               | 0 | 0.02 | 0 | 0.006923 | 97.97 |
| 979  | Paludibacter_OTU#945             | 0 | 0.02 | 0 | 0.006923 | 97.98 |
| 980  | Paludibacter_OTU#944             | 0 | 0.02 | 0 | 0.006923 | 98    |
| 981  | Barnesiella_OTU#943              | 0 | 0.02 | 0 | 0.006923 | 98.01 |
| 982  | Paludibacter_OTU#983             | 0 | 0.02 | 0 | 0.006923 | 98.02 |
| 983  | Hallella_OTU#942                 | 0 | 0.02 | 0 | 0.006923 | 98.03 |
| 984  | Barnesiella_OTU#940              | 0 | 0.02 | 0 | 0.006923 | 98.05 |
| 985  | Heliobacillus_OTU#235            | 0 | 0.02 | 0 | 0.006923 | 98.06 |
| 986  | Marvinbryantia_OTU#232           | 0 | 0.02 | 0 | 0.006923 | 98.07 |
| 987  | Syntrophococcus_OTU#228          | 0 | 0.02 | 0 | 0.006923 | 98.08 |
| 988  | Paludibacter_OTU#227             | 0 | 0.02 | 0 | 0.006923 | 98.09 |
| 989  | Allobaculum_OTU#225              | 0 | 0.02 | 0 | 0.006923 | 98.11 |
| 990  | Paludibacter_OTU#991             | 0 | 0.02 | 0 | 0.006923 | 98.12 |
| 991  | Butyrivibrio_OTU#223             | 0 | 0.02 | 0 | 0.006923 | 98.13 |
| 992  | Robinsoniella_OTU#220            | 0 | 0.02 | 0 | 0.006923 | 98.14 |
| 993  | Anaerophaga_OTU#219              | 0 | 0.02 | 0 | 0.006923 | 98.15 |
| 994  | Parasporobacterium_OTU#218       | 0 | 0.02 | 0 | 0.006923 | 98.17 |
| 995  | Roseburia_OTU#217                | 0 | 0.02 | 0 | 0.006923 | 98.18 |
| 996  | Anaerophaga_OTU#997              | 0 | 0.02 | 0 | 0.006923 | 98.19 |
| 997  | Butyrivibrio_OTU#215             | 0 | 0.02 | 0 | 0.006923 | 98.2  |
| 998  | Paludibacter_OTU#999             | 0 | 0.02 | 0 | 0.006923 | 98.22 |
| 999  | Hydrogenoanaerobacterium_OTU#213 | 0 | 0.02 | 0 | 0.006923 | 98.23 |
| 1000 | Parasporobacterium_OTU#210       | 0 | 0.02 | 0 | 0.006923 | 98.24 |
| 1001 | Robinsoniella_OTU#209            | 0 | 0.02 | 0 | 0.006923 | 98.25 |
| 1002 | Anaerotruncus_OTU#1003           | 0 | 0.02 | 0 | 0.006923 | 98.26 |
| 1003 | Limibacter_OTU#208               | 0 | 0.02 | 0 | 0.006923 | 98.28 |
| 1004 | Paludibacter_OTU#205             | 0 | 0.02 | 0 | 0.006923 | 98.29 |
| 1005 | Roseburia_OTU#200                | 0 | 0.02 | 0 | 0.006923 | 98.3  |
| 1006 | Paludibacter_OTU#1007            | 0 | 0.02 | 0 | 0.006923 | 98.31 |
| 1007 | Dorea_OTU#199                    | 0 | 0.02 | 0 | 0.006923 | 98.32 |
| 1008 | Marvinbryantia_OTU#195           | 0 | 0.02 | 0 | 0.006923 | 98.34 |
| 1009 | Dorea_OTU#193                    | 0 | 0.02 | 0 | 0.006923 | 98.35 |
| 1010 | Hespellia_OTU#188                | 0 | 0.02 | 0 | 0.006923 | 98.36 |
| 1011 | Robinsoniella_OTU#187            | 0 | 0.02 | 0 | 0.006923 | 98.37 |
| 1012 | Solobacterium_OTU#185            | 0 | 0.02 | 0 | 0.006923 | 98.39 |
| 1013 | Sporobacterium_OTU#183           | 0 | 0.02 | 0 | 0.006923 | 98.4  |
| 1014 | Barnesiella_OTU#177              | 0 | 0.02 | 0 | 0.006923 | 98.41 |
| 1015 | Paludibacter_OTU#342             | 0 | 0.02 | 0 | 0.006923 | 98.42 |

Supplementary Table 4

|      |                            |   |      |   |          |       |
|------|----------------------------|---|------|---|----------|-------|
| 1016 | Oscillibacter_OTU#171      | 0 | 0.02 | 0 | 0.006923 | 98.43 |
| 1017 | Howardella_OTU#170         | 0 | 0.02 | 0 | 0.006923 | 98.45 |
| 1018 | Limibacter_OTU#339         | 0 | 0.02 | 0 | 0.006923 | 98.46 |
| 1019 | Dorea_OTU#338              | 0 | 0.02 | 0 | 0.006923 | 98.47 |
| 1020 | Bulleidia_OTU#336          | 0 | 0.02 | 0 | 0.006923 | 98.48 |
| 1021 | Paludibacter_OTU#335       | 0 | 0.02 | 0 | 0.006923 | 98.49 |
| 1022 | Limibacter_OTU#333         | 0 | 0.02 | 0 | 0.006923 | 98.51 |
| 1023 | Paludibacter_OTU#331       | 0 | 0.02 | 0 | 0.006923 | 98.52 |
| 1024 | Atopobacter_OTU#330        | 0 | 0.02 | 0 | 0.006923 | 98.53 |
| 1025 | Butyrivibrio_OTU#329       | 0 | 0.02 | 0 | 0.006923 | 98.54 |
| 1026 | Lactobacillus_OTU#328      | 0 | 0.02 | 0 | 0.006923 | 98.56 |
| 1027 | Paludibacter_OTU#327       | 0 | 0.02 | 0 | 0.006923 | 98.57 |
| 1028 | Butyricoccus_OTU#326       | 0 | 0.02 | 0 | 0.006923 | 98.58 |
| 1029 | Lachnobacterium_OTU#324    | 0 | 0.02 | 0 | 0.006923 | 98.59 |
| 1030 | Marvinbryantia_OTU#323     | 0 | 0.02 | 0 | 0.006923 | 98.6  |
| 1031 | Anaerophaga_OTU#322        | 0 | 0.02 | 0 | 0.006923 | 98.62 |
| 1032 | Marvinbryantia_OTU#320     | 0 | 0.02 | 0 | 0.006923 | 98.63 |
| 1033 | Marvinbryantia_OTU#314     | 0 | 0.02 | 0 | 0.006923 | 98.64 |
| 1034 | Paludibacter_OTU#313       | 0 | 0.02 | 0 | 0.006923 | 98.65 |
| 1035 | Acetitomaculum_OTU#312     | 0 | 0.02 | 0 | 0.006923 | 98.66 |
| 1036 | Robinsoniella_OTU#311      | 0 | 0.02 | 0 | 0.006923 | 98.68 |
| 1037 | Coprococcus_OTU#304        | 0 | 0.02 | 0 | 0.006923 | 98.69 |
| 1038 | Faecalibacterium_OTU#301   | 0 | 0.02 | 0 | 0.006923 | 98.7  |
| 1039 | Limibacter_OTU#300         | 0 | 0.02 | 0 | 0.006923 | 98.71 |
| 1040 | Lactonifactor_OTU#299      | 0 | 0.02 | 0 | 0.006923 | 98.73 |
| 1041 | Oscillibacter_OTU#297      | 0 | 0.02 | 0 | 0.006923 | 98.74 |
| 1042 | Marvinbryantia_OTU#296     | 0 | 0.02 | 0 | 0.006923 | 98.75 |
| 1043 | Lachnobacterium_OTU#294    | 0 | 0.02 | 0 | 0.006923 | 98.76 |
| 1044 | Marvinbryantia_OTU#293     | 0 | 0.02 | 0 | 0.006923 | 98.77 |
| 1045 | Roseburia_OTU#292          | 0 | 0.02 | 0 | 0.006923 | 98.79 |
| 1046 | Allobaculum_OTU#291        | 0 | 0.02 | 0 | 0.006923 | 98.8  |
| 1047 | Barnesiella_OTU#288        | 0 | 0.02 | 0 | 0.006923 | 98.81 |
| 1048 | Barnesiella_OTU#285        | 0 | 0.02 | 0 | 0.006923 | 98.82 |
| 1049 | Parasporobacterium_OTU#282 | 0 | 0.02 | 0 | 0.006923 | 98.83 |
| 1050 | Dorea_OTU#279              | 0 | 0.02 | 0 | 0.006923 | 98.85 |
| 1051 | Syntrophococcus_OTU#278    | 0 | 0.02 | 0 | 0.006923 | 98.86 |
| 1052 | Anaerotruncus_OTU#274      | 0 | 0.02 | 0 | 0.006923 | 98.87 |
| 1053 | Allobaculum_OTU#266        | 0 | 0.02 | 0 | 0.006923 | 98.88 |
| 1054 | Coprococcus_OTU#265        | 0 | 0.02 | 0 | 0.006923 | 98.9  |
| 1055 | Paludibacter_OTU#262       | 0 | 0.02 | 0 | 0.006923 | 98.91 |
| 1056 | Anaerophaga_OTU#258        | 0 | 0.02 | 0 | 0.006923 | 98.92 |

|      |                          |   |      |   |          |       |
|------|--------------------------|---|------|---|----------|-------|
| 1057 | Anaerophaga_OTU#256      | 0 | 0.02 | 0 | 0.006923 | 98.93 |
| 1058 | Dorea_OTU#1022           | 0 | 0.02 | 0 | 0.006923 | 98.94 |
| 1059 | Robinsoniella_OTU#1020   | 0 | 0.02 | 0 | 0.006923 | 98.96 |
| 1060 | Syntrophococcus_OTU#1019 | 0 | 0.02 | 0 | 0.006923 | 98.97 |
| 1061 | Robinsoniella_OTU#1018   | 0 | 0.02 | 0 | 0.006923 | 98.98 |
| 1062 | Anaerophaga_OTU#1017     | 0 | 0.02 | 0 | 0.006923 | 98.99 |
| 1063 | Coprococcus_OTU#1016     | 0 | 0.02 | 0 | 0.006923 | 99    |
| 1064 | Marvinbryantia_OTU#1015  | 0 | 0.02 | 0 | 0.006923 | 99.02 |
| 1065 | Butyrivibrio_OTU#1014    | 0 | 0.02 | 0 | 0.006923 | 99.03 |
| 1066 | Paludibacter_OTU#1013    | 0 | 0.02 | 0 | 0.006923 | 99.04 |
| 1067 | Barnesiella_OTU#1071     | 0 | 0.02 | 0 | 0.006923 | 99.05 |
| 1068 | Barnesiella_OTU#1070     | 0 | 0.02 | 0 | 0.006923 | 99.07 |
| 1069 | Acetitomaculum_OTU#1069  | 0 | 0.02 | 0 | 0.006923 | 99.08 |
| 1070 | Paludibacter_OTU#1068    | 0 | 0.02 | 0 | 0.006923 | 99.09 |
| 1071 | Barnesiella_OTU#1067     | 0 | 0.02 | 0 | 0.006923 | 99.1  |
| 1072 | Paludibacter_OTU#1066    | 0 | 0.02 | 0 | 0.006923 | 99.11 |
| 1073 | Tannerella_OTU#1064      | 0 | 0.02 | 0 | 0.006923 | 99.13 |
| 1074 | Coprococcus_OTU#1063     | 0 | 0.02 | 0 | 0.006923 | 99.14 |
| 1075 | Barnesiella_OTU#1062     | 0 | 0.02 | 0 | 0.006923 | 99.15 |
| 1076 | Limibacter_OTU#1061      | 0 | 0.02 | 0 | 0.006923 | 99.16 |
| 1077 | Coprococcus_OTU#1060     | 0 | 0.02 | 0 | 0.006923 | 99.17 |
| 1078 | Coprococcus_OTU#1059     | 0 | 0.02 | 0 | 0.006923 | 99.19 |
| 1079 | Robinsoniella_OTU#1058   | 0 | 0.02 | 0 | 0.006923 | 99.2  |
| 1080 | Marvinbryantia_OTU#1057  | 0 | 0.02 | 0 | 0.006923 | 99.21 |
| 1081 | Howardella_OTU#1056      | 0 | 0.02 | 0 | 0.006923 | 99.22 |
| 1082 | Paludibacter_OTU#1055    | 0 | 0.02 | 0 | 0.006923 | 99.24 |
| 1083 | Barnesiella_OTU#1054     | 0 | 0.02 | 0 | 0.006923 | 99.25 |
| 1084 | Butyricoccus_OTU#1053    | 0 | 0.02 | 0 | 0.006923 | 99.26 |
| 1085 | Robinsoniella_OTU#1051   | 0 | 0.02 | 0 | 0.006923 | 99.27 |
| 1086 | Acetitomaculum_OTU#1049  | 0 | 0.02 | 0 | 0.006923 | 99.28 |
| 1087 | Limibacter_OTU#1048      | 0 | 0.02 | 0 | 0.006923 | 99.3  |
| 1088 | Marvinbryantia_OTU#1047  | 0 | 0.02 | 0 | 0.006923 | 99.31 |
| 1089 | Dorea_OTU#1046           | 0 | 0.02 | 0 | 0.006923 | 99.32 |
| 1090 | Rikenella_OTU#1045       | 0 | 0.02 | 0 | 0.006923 | 99.33 |
| 1091 | Catonella_OTU#1044       | 0 | 0.02 | 0 | 0.006923 | 99.34 |
| 1092 | Paludibacter_OTU#1043    | 0 | 0.02 | 0 | 0.006923 | 99.36 |
| 1093 | Paludibacter_OTU#1042    | 0 | 0.02 | 0 | 0.006923 | 99.37 |
| 1094 | Howardella_OTU#1041      | 0 | 0.02 | 0 | 0.006923 | 99.38 |
| 1095 | Howardella_OTU#1039      | 0 | 0.02 | 0 | 0.006923 | 99.39 |
| 1096 | Anaerotruncus_OTU#1038   | 0 | 0.02 | 0 | 0.006923 | 99.41 |
| 1097 | Oscillibacter_OTU#1037   | 0 | 0.02 | 0 | 0.006923 | 99.42 |

|      |                          |   |      |   |          |       |
|------|--------------------------|---|------|---|----------|-------|
| 1098 | Lachnobacterium_OTU#1036 | 0 | 0.02 | 0 | 0.006923 | 99.43 |
| 1099 | Lachnobacterium_OTU#1035 | 0 | 0.02 | 0 | 0.006923 | 99.44 |
| 1100 | Lactobacillus_OTU#1033   | 0 | 0.02 | 0 | 0.006923 | 99.45 |
| 1101 | Paludibacter_OTU#1032    | 0 | 0.02 | 0 | 0.006923 | 99.47 |
| 1102 | Robinsoniella_OTU#1031   | 0 | 0.02 | 0 | 0.006923 | 99.48 |
| 1103 | Coproccoccus_OTU#1030    | 0 | 0.02 | 0 | 0.006923 | 99.49 |
| 1104 | Barnesiella_OTU#1029     | 0 | 0.02 | 0 | 0.006923 | 99.5  |
| 1105 | Butyricococcus_OTU#1028  | 0 | 0.02 | 0 | 0.006923 | 99.51 |
| 1106 | Paludibacter_OTU#1027    | 0 | 0.02 | 0 | 0.006923 | 99.53 |
| 1107 | Paludibacter_OTU#1026    | 0 | 0.02 | 0 | 0.006923 | 99.54 |
| 1108 | Dorea_OTU#1025           | 0 | 0.02 | 0 | 0.006923 | 99.55 |
| 1109 | Paludibacter_OTU#1024    | 0 | 0.02 | 0 | 0.006923 | 99.56 |
| 1110 | Paludibacter_OTU#939     | 0 | 0.02 | 0 | 0.00692  | 99.58 |
| 1111 | Rikenella_OTU#938        | 0 | 0.02 | 0 | 0.00692  | 99.59 |
| 1112 | Allobaculum_OTU#937      | 0 | 0.02 | 0 | 0.00692  | 99.6  |
| 1113 | Barnesiella_OTU#936      | 0 | 0.02 | 0 | 0.00692  | 99.61 |
| 1114 | Tannerella_OTU#935       | 0 | 0.02 | 0 | 0.00692  | 99.62 |
| 1115 | Sharpea_OTU#934          | 0 | 0.02 | 0 | 0.00692  | 99.64 |
| 1116 | Barnesiella_OTU#933      | 0 | 0.02 | 0 | 0.00692  | 99.65 |
| 1117 | Paludibacter_OTU#932     | 0 | 0.02 | 0 | 0.00692  | 99.66 |
| 1118 | Paludibacter_OTU#930     | 0 | 0.02 | 0 | 0.00692  | 99.67 |
| 1119 | Paludibacter_OTU#929     | 0 | 0.02 | 0 | 0.00692  | 99.68 |
| 1120 | Paludibacter_OTU#928     | 0 | 0.02 | 0 | 0.00692  | 99.7  |
| 1121 | Paludibacter_OTU#927     | 0 | 0.02 | 0 | 0.00692  | 99.71 |
| 1122 | Paludibacter_OTU#926     | 0 | 0.02 | 0 | 0.00692  | 99.72 |
| 1123 | Paludibacter_OTU#925     | 0 | 0.02 | 0 | 0.00692  | 99.73 |
| 1124 | Paludibacter_OTU#924     | 0 | 0.02 | 0 | 0.00692  | 99.75 |
| 1125 | Aquiflexum_OTU#923       | 0 | 0.02 | 0 | 0.00692  | 99.76 |
| 1126 | Barnesiella_OTU#922      | 0 | 0.02 | 0 | 0.00692  | 99.77 |
| 1127 | Paludibacter_OTU#921     | 0 | 0.02 | 0 | 0.00692  | 99.78 |
| 1128 | Paludibacter_OTU#920     | 0 | 0.02 | 0 | 0.00692  | 99.79 |
| 1129 | Paludibacter_OTU#919     | 0 | 0.02 | 0 | 0.00692  | 99.81 |
| 1130 | Paludibacter_OTU#917     | 0 | 0.02 | 0 | 0.00692  | 99.82 |
| 1131 | Butyricimonas_OTU#916    | 0 | 0.02 | 0 | 0.00692  | 99.83 |
| 1132 | Paludibacter_OTU#914     | 0 | 0.02 | 0 | 0.00692  | 99.84 |
| 1133 | Anaerophaga_OTU#913      | 0 | 0.02 | 0 | 0.00692  | 99.85 |
| 1134 | Paludibacter_OTU#912     | 0 | 0.02 | 0 | 0.00692  | 99.87 |
| 1135 | Akkermansia_OTU#911      | 0 | 0.02 | 0 | 0.00692  | 99.88 |
| 1136 | Paludibacter_OTU#910     | 0 | 0.02 | 0 | 0.00692  | 99.89 |
| 1137 | Paludibacter_OTU#909     | 0 | 0.02 | 0 | 0.00692  | 99.9  |
| 1138 | Paludibacter_OTU#908     | 0 | 0.02 | 0 | 0.00692  | 99.92 |

Supplementary Table 4



|      |                          |   |      |   |         |       |
|------|--------------------------|---|------|---|---------|-------|
| 1139 | Limibacter_OTU#907       | 0 | 0.02 | 0 | 0.00692 | 99.93 |
| 1140 | Paludibacter_OTU#906     | 0 | 0.02 | 0 | 0.00692 | 99.94 |
| 1141 | Limibacter_OTU#905       | 0 | 0.02 | 0 | 0.00692 | 99.95 |
| 1142 | Anaerophaga_OTU#902      | 0 | 0.02 | 0 | 0.00692 | 99.96 |
| 1143 | Tannerella_OTU#901       | 0 | 0.02 | 0 | 0.00692 | 99.98 |
| 1144 | Lishizhenia_OTU#900      | 0 | 0.02 | 0 | 0.00692 | 99.99 |
| 1145 | Asaccharobacter_OTU#1145 | 0 | 0.02 | 0 | 0.00692 | 100   |

**Supplementary Table 5. OTUs in *Ace2*<sup>+y</sup> and *Ace2*<sup>-y</sup> mice with or without nicotinamide (NAM) treatment.**

Data are shown as the number of occurrences for each OTU detected by 454 sequencing.

| Taxonomical affiliation of OTUs | <i>Ace2</i> <sup>-y</sup> #1 | <i>Ace2</i> <sup>-y</sup> #2 | <i>Ace2</i> <sup>-y</sup> #3 | <i>Ace2</i> <sup>-y</sup> #4 | <i>Ace2</i> <sup>-y</sup> + NAM#1 | <i>Ace2</i> <sup>-y</sup> + NAM#2 | <i>Ace2</i> <sup>-y</sup> + NAM#3 | <i>Ace2</i> <sup>-y</sup> + NAM#4 | <i>Ace2</i> <sup>-y</sup> + NAM#5 | <i>Ace2</i> <sup>+y</sup> #1 | <i>Ace2</i> <sup>+y</sup> #2 | <i>Ace2</i> <sup>+y</sup> #3 | <i>Ace2</i> <sup>+y</sup> #4 | <i>Ace2</i> <sup>+y</sup> + NAM#1 | <i>Ace2</i> <sup>+y</sup> + NAM#2 | <i>Ace2</i> <sup>+y</sup> + NAM#3 | <i>Ace2</i> <sup>+y</sup> + NAM#4 | <i>Ace2</i> <sup>+y</sup> + NAM#5 |
|---------------------------------|------------------------------|------------------------------|------------------------------|------------------------------|-----------------------------------|-----------------------------------|-----------------------------------|-----------------------------------|-----------------------------------|------------------------------|------------------------------|------------------------------|------------------------------|-----------------------------------|-----------------------------------|-----------------------------------|-----------------------------------|-----------------------------------|
| Helicobacter_OTU#1              | 184                          | 45                           | 363                          | 66                           | 0                                 | 193                               | 201                               | 120                               | 493                               | 0                            | 0                            | 0                            | 1                            | 0                                 | 0                                 | 1                                 | 1                                 | 0                                 |
| Allobaculum_OTU#2               | 489                          | 178                          | 28                           | 217                          | 0                                 | 4                                 | 0                                 | 2                                 | 0                                 | 0                            | 0                            | 0                            | 0                            | 0                                 | 0                                 | 1                                 | 0                                 | 0                                 |
| Limibacter_OTU#3                | 7                            | 4                            | 3                            | 5                            | 1                                 | 0                                 | 0                                 | 0                                 | 0                                 | 3                            | 0                            | 3                            | 5                            | 2                                 | 0                                 | 0                                 | 0                                 | 2                                 |
| Allobaculum_OTU#4               | 17                           | 1                            | 1                            | 3                            | 0                                 | 0                                 | 0                                 | 0                                 | 0                                 | 0                            | 0                            | 0                            | 0                            | 0                                 | 0                                 | 0                                 | 0                                 | 0                                 |
| Limibacter_OTU#5                | 29                           | 103                          | 103                          | 133                          | 47                                | 98                                | 88                                | 101                               | 26                                | 42                           | 33                           | 93                           | 88                           | 188                               | 6                                 | 2                                 | 40                                | 207                               |
| Allobaculum_OTU#6               | 2                            | 0                            | 0                            | 0                            | 0                                 | 0                                 | 0                                 | 0                                 | 0                                 | 0                            | 0                            | 0                            | 0                            | 0                                 | 0                                 | 0                                 | 0                                 | 0                                 |
| Paludibacter_OTU#7              | 1                            | 0                            | 0                            | 0                            | 0                                 | 0                                 | 0                                 | 0                                 | 0                                 | 1                            | 0                            | 0                            | 0                            | 0                                 | 0                                 | 0                                 | 0                                 | 0                                 |
| Anaerophaga_OTU#8               | 17                           | 28                           | 24                           | 38                           | 118                               | 2                                 | 89                                | 33                                | 51                                | 1                            | 3                            | 1                            | 6                            | 0                                 | 0                                 | 0                                 | 0                                 | 0                                 |
| Tannerella_OTU#9                | 1                            | 1                            | 2                            | 0                            | 1                                 | 0                                 | 0                                 | 0                                 | 1                                 | 0                            | 0                            | 0                            | 0                            | 1                                 | 0                                 | 0                                 | 0                                 | 3                                 |
| Allobaculum_OTU#10              | 1                            | 2                            | 0                            | 0                            | 0                                 | 0                                 | 0                                 | 0                                 | 0                                 | 0                            | 0                            | 0                            | 0                            | 0                                 | 0                                 | 0                                 | 0                                 | 0                                 |
| Allobaculum_OTU#11              | 5                            | 2                            | 0                            | 1                            | 0                                 | 0                                 | 0                                 | 0                                 | 0                                 | 0                            | 0                            | 0                            | 0                            | 0                                 | 0                                 | 0                                 | 0                                 | 0                                 |
| Allobaculum_OTU#12              | 5                            | 4                            | 4                            | 2                            | 0                                 | 0                                 | 0                                 | 0                                 | 0                                 | 0                            | 0                            | 0                            | 0                            | 0                                 | 0                                 | 0                                 | 0                                 | 0                                 |
| Allobaculum_OTU#13              | 1                            | 1                            | 0                            | 0                            | 0                                 | 0                                 | 0                                 | 0                                 | 0                                 | 0                            | 0                            | 0                            | 0                            | 0                                 | 0                                 | 0                                 | 0                                 | 0                                 |
| Anaerophaga_OTU#14              | 5                            | 6                            | 3                            | 2                            | 8                                 | 0                                 | 9                                 | 7                                 | 4                                 | 0                            | 0                            | 0                            | 1                            | 0                                 | 0                                 | 0                                 | 0                                 | 0                                 |
| Anaerophaga_OTU#15              | 5                            | 7                            | 10                           | 14                           | 42                                | 0                                 | 32                                | 10                                | 15                                | 1                            | 0                            | 0                            | 1                            | 0                                 | 0                                 | 0                                 | 0                                 | 0                                 |
| Paludibacter_OTU#16             | 8                            | 45                           | 18                           | 15                           | 54                                | 50                                | 44                                | 34                                | 28                                | 1                            | 4                            | 7                            | 1                            | 44                                | 28                                | 64                                | 15                                | 59                                |
| Allobaculum_OTU#17              | 12                           | 22                           | 6                            | 10                           | 0                                 | 1                                 | 0                                 | 1                                 | 0                                 | 0                            | 1                            | 0                            | 0                            | 0                                 | 0                                 | 1                                 | 0                                 | 0                                 |
| Anaerophaga_OTU#18              | 1                            | 0                            | 0                            | 0                            | 0                                 | 0                                 | 0                                 | 0                                 | 0                                 | 0                            | 0                            | 0                            | 0                            | 0                                 | 0                                 | 0                                 | 0                                 | 0                                 |
| Allobaculum_OTU#19              | 3                            | 0                            | 0                            | 1                            | 0                                 | 0                                 | 0                                 | 0                                 | 0                                 | 0                            | 0                            | 0                            | 0                            | 0                                 | 0                                 | 0                                 | 0                                 | 0                                 |
| Anaerophaga_OTU#20              | 1                            | 0                            | 0                            | 0                            | 0                                 | 0                                 | 0                                 | 0                                 | 0                                 | 0                            | 0                            | 0                            | 0                            | 0                                 | 0                                 | 0                                 | 0                                 | 0                                 |

|                       |    |    |    |    |    |    |    |    |    |    |    |    |     |     |    |    |    |     |
|-----------------------|----|----|----|----|----|----|----|----|----|----|----|----|-----|-----|----|----|----|-----|
| Paludibacter_OTU#21   | 1  | 0  | 0  | 0  | 0  | 0  | 0  | 0  | 0  | 0  | 0  | 0  | 0   | 0   | 0  | 0  | 0  | 0   |
| Tannerella_OTU#22     | 8  | 11 | 11 | 4  | 80 | 23 | 42 | 50 | 52 | 47 | 28 | 35 | 144 | 164 | 0  | 2  | 60 | 160 |
| Paludibacter_OTU#23   | 1  | 0  | 0  | 0  | 0  | 0  | 0  | 0  | 0  | 0  | 0  | 0  | 0   | 0   | 0  | 0  | 0  | 0   |
| Peptococcus_OTU#24    | 1  | 0  | 0  | 0  | 0  | 0  | 0  | 0  | 0  | 0  | 21 | 0  | 0   | 0   | 0  | 0  | 0  | 0   |
| Allobaculum_OTU#25    | 1  | 0  | 0  | 0  | 0  | 0  | 0  | 0  | 0  | 0  | 0  | 0  | 0   | 0   | 0  | 0  | 0  | 0   |
| Paludibacter_OTU#26   | 1  | 4  | 1  | 0  | 0  | 0  | 0  | 0  | 0  | 1  | 0  | 0  | 0   | 1   | 1  | 2  | 0  | 1   |
| Allobaculum_OTU#27    | 1  | 0  | 0  | 0  | 0  | 0  | 0  | 0  | 0  | 0  | 0  | 0  | 0   | 0   | 0  | 0  | 0  | 0   |
| Butyricoccus_OTU#28   | 1  | 0  | 0  | 0  | 0  | 0  | 0  | 0  | 0  | 0  | 0  | 0  | 0   | 0   | 0  | 0  | 0  | 0   |
| Limibacter_OTU#29     | 7  | 10 | 2  | 2  | 0  | 0  | 0  | 0  | 0  | 4  | 2  | 0  | 1   | 0   | 0  | 0  | 0  | 0   |
| Allobaculum_OTU#30    | 1  | 0  | 0  | 0  | 0  | 0  | 0  | 0  | 0  | 0  | 0  | 0  | 0   | 0   | 0  | 0  | 0  | 0   |
| Parasutterella_OTU#31 | 1  | 0  | 0  | 0  | 0  | 0  | 0  | 0  | 0  | 0  | 0  | 0  | 0   | 0   | 0  | 0  | 0  | 0   |
| Allobaculum_OTU#32    | 13 | 19 | 7  | 3  | 1  | 0  | 0  | 0  | 0  | 1  | 1  | 1  | 1   | 0   | 0  | 0  | 0  | 2   |
| Rikenella_OTU#33      | 4  | 7  | 3  | 7  | 46 | 18 | 20 | 22 | 24 | 4  | 11 | 10 | 18  | 11  | 90 | 58 | 1  | 14  |
| Barnesiella_OTU#34    | 11 | 22 | 14 | 9  | 6  | 69 | 20 | 27 | 11 | 4  | 2  | 1  | 2   | 10  | 9  | 30 | 0  | 0   |
| Barnesiella_OTU#35    | 20 | 40 | 18 | 52 | 8  | 1  | 0  | 0  | 2  | 12 | 10 | 15 | 9   | 10  | 0  | 0  | 5  | 2   |
| Allobaculum_OTU#36    | 1  | 0  | 0  | 0  | 0  | 0  | 0  | 0  | 0  | 0  | 0  | 0  | 0   | 0   | 0  | 0  | 0  | 0   |
| Helicobacter_OTU#37   | 2  | 0  | 0  | 0  | 0  | 0  | 0  | 0  | 0  | 0  | 0  | 0  | 0   | 0   | 0  | 0  | 0  | 0   |
| Paludibacter_OTU#38   | 1  | 1  | 3  | 1  | 2  | 4  | 1  | 1  | 0  | 0  | 1  | 0  | 1   | 0   | 0  | 0  | 0  | 1   |
| Allobaculum_OTU#39    | 4  | 2  | 1  | 4  | 0  | 0  | 0  | 0  | 0  | 0  | 0  | 0  | 0   | 0   | 0  | 0  | 0  | 0   |
| Allobaculum_OTU#40    | 1  | 0  | 0  | 0  | 0  | 0  | 0  | 0  | 0  | 0  | 0  | 0  | 0   | 0   | 0  | 0  | 0  | 0   |
| Paludibacter_OTU#41   | 1  | 1  | 0  | 0  | 3  | 0  | 3  | 0  | 0  | 1  | 0  | 0  | 0   | 2   | 0  | 0  | 0  | 5   |
| Allobaculum_OTU#42    | 1  | 0  | 0  | 0  | 0  | 0  | 0  | 0  | 0  | 0  | 0  | 0  | 0   | 0   | 0  | 0  | 0  | 0   |
| Barnesiella_OTU#43    | 13 | 40 | 16 | 38 | 2  | 1  | 0  | 1  | 0  | 46 | 46 | 59 | 33  | 24  | 0  | 0  | 7  | 14  |
| Limibacter_OTU#44     | 1  | 0  | 0  | 0  | 0  | 0  | 0  | 0  | 0  | 0  | 0  | 0  | 0   | 0   | 0  | 0  | 0  | 0   |
| Limibacter_OTU#45     | 1  | 0  | 0  | 0  | 0  | 0  | 0  | 0  | 0  | 0  | 0  | 0  | 0   | 0   | 0  | 0  | 0  | 0   |
| Bulleidia_OTU#46      | 1  | 0  | 0  | 0  | 0  | 0  | 0  | 0  | 0  | 0  | 0  | 0  | 0   | 0   | 0  | 0  | 0  | 0   |
| Allobaculum_OTU#47    | 9  | 22 | 7  | 4  | 0  | 1  | 0  | 2  | 0  | 0  | 2  | 1  | 0   | 0   | 0  | 0  | 4  | 2   |
| Helicobacter_OTU#48   | 1  | 0  | 0  | 0  | 0  | 0  | 0  | 0  | 0  | 0  | 0  | 0  | 0   | 0   | 0  | 0  | 0  | 0   |
| Anaerophaga_OTU#49    | 1  | 1  | 1  | 2  | 1  | 0  | 1  | 0  | 2  | 0  | 0  | 0  | 0   | 0   | 0  | 0  | 0  | 0   |
| Limibacter_OTU#50     | 1  | 0  | 0  | 0  | 0  | 0  | 0  | 0  | 0  | 0  | 0  | 0  | 0   | 0   | 0  | 0  | 0  | 0   |
| Allobaculum_OTU#51    | 1  | 0  | 0  | 0  | 0  | 0  | 0  | 0  | 0  | 0  | 0  | 0  | 0   | 0   | 0  | 0  | 0  | 0   |
| Allobaculum_OTU#52    | 1  | 0  | 1  | 0  | 0  | 0  | 0  | 0  | 0  | 0  | 0  | 0  | 0   | 0   | 0  | 0  | 0  | 0   |
| Paludibacter_OTU#53   | 1  | 1  | 1  | 1  | 0  | 1  | 2  | 1  | 0  | 0  | 1  | 1  | 1   | 3   | 0  | 0  | 0  | 2   |

Supplementary Table 5

|                                   |    |    |    |    |    |    |    |    |    |    |    |    |    |     |     |     |    |    |
|-----------------------------------|----|----|----|----|----|----|----|----|----|----|----|----|----|-----|-----|-----|----|----|
| Marvinbryantia_OTU#54             | 1  | 0  | 0  | 0  | 0  | 0  | 0  | 0  | 0  | 0  | 0  | 3  | 0  | 0   | 0   | 0   | 0  | 0  |
| Marinifilum_OTU#55                | 1  | 0  | 0  | 0  | 0  | 0  | 0  | 0  | 0  | 0  | 0  | 0  | 0  | 0   | 0   | 0   | 0  | 0  |
| Asaccharobacter_OTU#56            | 1  | 0  | 2  | 0  | 0  | 0  | 0  | 0  | 0  | 0  | 0  | 0  | 0  | 2   | 0   | 0   | 0  | 0  |
| Paludibacter_OTU#57               | 2  | 26 | 9  | 11 | 6  | 22 | 7  | 25 | 0  | 21 | 18 | 28 | 29 | 6   | 22  | 17  | 0  | 5  |
| Olsenella_OTU#58                  | 1  | 6  | 5  | 15 | 4  | 1  | 0  | 1  | 0  | 0  | 1  | 1  | 4  | 0   | 0   | 0   | 0  | 0  |
| Helicobacter_OTU#59               | 1  | 0  | 0  | 0  | 0  | 0  | 0  | 0  | 0  | 0  | 0  | 0  | 0  | 0   | 0   | 0   | 0  | 0  |
| Barnesiella_OTU#60                | 2  | 0  | 0  | 1  | 0  | 0  | 0  | 0  | 0  | 0  | 0  | 0  | 0  | 0   | 0   | 0   | 0  | 0  |
| Paludibacter_OTU#61               | 1  | 0  | 0  | 0  | 0  | 0  | 0  | 0  | 0  | 0  | 0  | 0  | 0  | 0   | 0   | 0   | 0  | 0  |
| Paludibacter_OTU#62               | 2  | 2  | 1  | 1  | 1  | 0  | 2  | 3  | 0  | 10 | 7  | 5  | 0  | 103 | 82  | 143 | 25 | 98 |
| Barnesiella_OTU#63                | 1  | 0  | 0  | 0  | 0  | 0  | 0  | 0  | 0  | 0  | 0  | 0  | 0  | 0   | 0   | 0   | 0  | 0  |
| Limibacter_OTU#64                 | 1  | 0  | 0  | 0  | 0  | 1  | 0  | 0  | 0  | 0  | 0  | 0  | 0  | 0   | 0   | 0   | 0  | 1  |
| Allobaculum_OTU#65                | 1  | 3  | 0  | 0  | 0  | 0  | 0  | 0  | 0  | 0  | 0  | 0  | 0  | 0   | 0   | 0   | 0  | 0  |
| Allobaculum_OTU#66                | 1  | 2  | 0  | 1  | 0  | 0  | 0  | 0  | 0  | 0  | 0  | 0  | 0  | 0   | 0   | 0   | 0  | 0  |
| Parasutterella_OTU#67             | 15 | 24 | 24 | 25 | 65 | 71 | 32 | 26 | 17 | 13 | 20 | 44 | 17 | 86  | 75  | 184 | 36 | 79 |
| Rikenella_OTU#68                  | 2  | 4  | 6  | 5  | 42 | 35 | 14 | 28 | 18 | 21 | 27 | 20 | 45 | 39  | 250 | 172 | 21 | 40 |
| Paludibacter_OTU#69               | 2  | 1  | 4  | 0  | 0  | 0  | 1  | 0  | 0  | 0  | 0  | 0  | 0  | 0   | 0   | 0   | 0  | 0  |
| Paludibacter_OTU#70               | 2  | 8  | 4  | 5  | 5  | 0  | 0  | 1  | 0  | 0  | 0  | 0  | 0  | 3   | 18  | 33  | 5  | 3  |
| Paludibacter_OTU#71               | 2  | 10 | 3  | 6  | 2  | 2  | 7  | 2  | 0  | 34 | 43 | 87 | 54 | 5   | 0   | 0   | 0  | 6  |
| Allobaculum_OTU#72                | 3  | 0  | 1  | 0  | 0  | 0  | 0  | 0  | 0  | 0  | 0  | 0  | 0  | 0   | 0   | 0   | 0  | 0  |
| Barnesiella_OTU#73                | 1  | 2  | 0  | 0  | 0  | 0  | 0  | 0  | 0  | 0  | 1  | 0  | 0  | 0   | 0   | 0   | 0  | 0  |
| Allobaculum_OTU#74                | 1  | 0  | 0  | 0  | 0  | 0  | 0  | 0  | 0  | 0  | 0  | 0  | 0  | 0   | 0   | 0   | 0  | 0  |
| Allobaculum_OTU#75                | 1  | 0  | 0  | 0  | 0  | 0  | 0  | 0  | 0  | 0  | 0  | 0  | 0  | 0   | 0   | 0   | 0  | 0  |
| Paludibacter_OTU#76               | 1  | 0  | 0  | 0  | 1  | 0  | 3  | 2  | 0  | 0  | 0  | 0  | 0  | 0   | 0   | 0   | 0  | 0  |
| unclassified Bacteroidales_OTU#77 | 2  | 3  | 1  | 0  | 0  | 0  | 2  | 1  | 0  | 0  | 1  | 0  | 0  | 0   | 0   | 0   | 0  | 0  |
| Flexithrix_OTU#78                 | 3  | 0  | 1  | 0  | 0  | 2  | 1  | 2  | 2  | 0  | 0  | 0  | 0  | 0   | 0   | 0   | 0  | 0  |
| Paludibacter_OTU#79               | 1  | 0  | 0  | 0  | 0  | 0  | 0  | 0  | 0  | 0  | 0  | 0  | 0  | 1   | 0   | 0   | 0  | 0  |
| Anaerophaga_OTU#80                | 1  | 0  | 0  | 0  | 0  | 0  | 0  | 0  | 0  | 0  | 0  | 0  | 0  | 0   | 0   | 0   | 0  | 0  |
| Helicobacter_OTU#81               | 1  | 0  | 0  | 0  | 0  | 0  | 1  | 0  | 0  | 0  | 0  | 0  | 0  | 0   | 0   | 0   | 0  | 0  |
| Parasutterella_OTU#82             | 1  | 0  | 0  | 0  | 2  | 3  | 1  | 2  | 0  | 0  | 0  | 0  | 0  | 0   | 0   | 0   | 0  | 0  |
| Paludibacter_OTU#83               | 2  | 1  | 1  | 1  | 1  | 4  | 2  | 2  | 3  | 0  | 0  | 1  | 4  | 3   | 0   | 0   | 0  | 1  |
| Barnesiella_OTU#84                | 1  | 0  | 0  | 0  | 0  | 0  | 0  | 0  | 0  | 0  | 0  | 0  | 0  | 0   | 0   | 0   | 0  | 0  |
| Allobaculum_OTU#85                | 2  | 0  | 0  | 0  | 0  | 0  | 0  | 0  | 0  | 0  | 0  | 0  | 0  | 0   | 0   | 0   | 0  | 0  |
| Limibacter_OTU#86                 | 1  | 0  | 0  | 0  | 0  | 0  | 0  | 0  | 0  | 0  | 0  | 0  | 0  | 0   | 0   | 0   | 0  | 0  |

Supplementary Table 5

|                                        |   |    |    |   |     |    |    |     |    |   |    |   |    |    |     |    |    |   |
|----------------------------------------|---|----|----|---|-----|----|----|-----|----|---|----|---|----|----|-----|----|----|---|
| Anaerophaga_OTU#87                     | 1 | 0  | 0  | 0 | 0   | 0  | 1  | 1   | 0  | 0 | 0  | 0 | 0  | 0  | 0   | 0  | 0  | 0 |
| Paludibacter_OTU#88                    | 1 | 0  | 1  | 0 | 0   | 0  | 0  | 0   | 0  | 0 | 0  | 1 | 0  | 0  | 0   | 0  | 0  | 0 |
| Limibacter_OTU#89                      | 1 | 0  | 0  | 0 | 0   | 0  | 0  | 0   | 0  | 0 | 0  | 0 | 0  | 0  | 0   | 0  | 0  |   |
| Parasutterella_OTU#90                  | 1 | 0  | 0  | 0 | 0   | 0  | 0  | 0   | 0  | 0 | 0  | 0 | 0  | 0  | 0   | 0  | 0  |   |
| Allobaculum_OTU#91                     | 1 | 0  | 0  | 0 | 0   | 0  | 0  | 0   | 0  | 0 | 0  | 0 | 0  | 0  | 0   | 0  | 0  |   |
| Limibacter_OTU#92                      | 1 | 1  | 1  | 1 | 0   | 0  | 0  | 1   | 0  | 0 | 0  | 1 | 1  | 0  | 0   | 0  | 1  |   |
| Limibacter_OTU#93                      | 1 | 0  | 0  | 0 | 0   | 0  | 0  | 0   | 0  | 0 | 0  | 0 | 0  | 0  | 0   | 0  | 0  |   |
| Paludibacter_OTU#94                    | 2 | 2  | 1  | 3 | 3   | 1  | 1  | 5   | 0  | 0 | 0  | 0 | 4  | 6  | 0   | 0  | 4  |   |
| unclassified Porphyromonadaceae_OTU#95 | 1 | 1  | 0  | 0 | 0   | 0  | 0  | 0   | 0  | 0 | 0  | 0 | 0  | 0  | 0   | 0  | 0  |   |
| Paludibacter_OTU#96                    | 1 | 2  | 0  | 0 | 0   | 0  | 0  | 0   | 0  | 0 | 0  | 0 | 0  | 0  | 0   | 0  | 0  |   |
| Paludibacter_OTU#97                    | 1 | 1  | 0  | 0 | 1   | 0  | 1  | 0   | 0  | 0 | 0  | 0 | 0  | 0  | 0   | 2  | 1  |   |
| Paludibacter_OTU#98                    | 1 | 1  | 0  | 0 | 1   | 2  | 0  | 1   | 0  | 1 | 0  | 3 | 1  | 7  | 0   | 0  | 6  |   |
| Rikenella_OTU#99                       | 2 | 0  | 0  | 2 | 0   | 0  | 0  | 0   | 0  | 0 | 0  | 5 | 3  | 0  | 0   | 0  | 0  |   |
| Paludibacter_OTU#100                   | 1 | 0  | 1  | 0 | 0   | 2  | 0  | 0   | 0  | 0 | 0  | 0 | 0  | 0  | 0   | 0  | 0  |   |
| Barnesiella_OTU#101                    | 1 | 0  | 0  | 0 | 0   | 0  | 0  | 0   | 0  | 0 | 0  | 0 | 0  | 0  | 0   | 0  | 0  |   |
| Butyrivibrio_OTU#102                   | 1 | 0  | 0  | 1 | 0   | 0  | 0  | 0   | 0  | 3 | 4  | 0 | 0  | 0  | 0   | 0  | 0  |   |
| Allobaculum_OTU#103                    | 1 | 1  | 0  | 0 | 0   | 0  | 0  | 0   | 0  | 0 | 0  | 0 | 0  | 0  | 0   | 0  | 0  |   |
| Paludibacter_OTU#104                   | 1 | 2  | 0  | 0 | 0   | 0  | 0  | 0   | 0  | 0 | 1  | 1 | 0  | 0  | 0   | 0  | 1  |   |
| Parasutterella_OTU#105                 | 1 | 14 | 7  | 4 | 111 | 50 | 97 | 158 | 45 | 0 | 0  | 0 | 0  | 0  | 0   | 1  | 14 |   |
| Paludibacter_OTU#106                   | 1 | 0  | 1  | 0 | 0   | 1  | 0  | 5   | 3  | 2 | 3  | 2 | 9  | 3  | 0   | 0  | 4  |   |
| Paludibacter_OTU#107                   | 1 | 2  | 1  | 0 | 0   | 1  | 0  | 3   | 0  | 0 | 0  | 1 | 0  | 5  | 0   | 1  | 6  |   |
| Rikenella_OTU#108                      | 1 | 4  | 2  | 1 | 13  | 18 | 4  | 20  | 4  | 1 | 1  | 1 | 1  | 5  | 1   | 0  | 13 |   |
| Bulleidia_OTU#109                      | 1 | 0  | 0  | 0 | 0   | 0  | 0  | 0   | 0  | 0 | 0  | 0 | 0  | 0  | 0   | 0  | 0  |   |
| Parasutterella_OTU#110                 | 1 | 1  | 1  | 1 | 0   | 0  | 0  | 0   | 0  | 0 | 0  | 1 | 0  | 0  | 0   | 0  | 0  |   |
| Limibacter_OTU#111                     | 1 | 0  | 1  | 0 | 0   | 0  | 0  | 0   | 0  | 0 | 0  | 0 | 0  | 0  | 0   | 0  | 0  |   |
| Limibacter_OTU#112                     | 1 | 0  | 1  | 1 | 1   | 0  | 1  | 1   | 0  | 0 | 0  | 0 | 0  | 0  | 0   | 0  | 0  |   |
| Paludibacter_OTU#113                   | 1 | 0  | 0  | 0 | 0   | 0  | 0  | 0   | 0  | 0 | 0  | 0 | 0  | 0  | 0   | 0  | 0  |   |
| Paludibacter_OTU#114                   | 1 | 0  | 1  | 0 | 1   | 0  | 0  | 0   | 0  | 0 | 0  | 0 | 0  | 0  | 0   | 0  | 0  |   |
| Barnesiella_OTU#115                    | 1 | 3  | 1  | 0 | 0   | 0  | 0  | 0   | 0  | 0 | 0  | 0 | 0  | 0  | 0   | 0  | 0  |   |
| Lactobacillus_OTU#116                  | 0 | 6  | 0  | 0 | 4   | 6  | 0  | 1   | 0  | 0 | 0  | 0 | 0  | 5  | 306 | 68 | 37 |   |
| Limibacter_OTU#117                     | 0 | 0  | 0  | 0 | 0   | 0  | 0  | 0   | 0  | 0 | 0  | 0 | 0  | 0  | 0   | 0  | 1  |   |
| Paludibacter_OTU#118                   | 0 | 8  | 13 | 3 | 13  | 42 | 28 | 35  | 12 | 5 | 18 | 7 | 22 | 25 | 0   | 1  | 15 |   |
| Allobaculum_OTU#119                    | 0 | 0  | 0  | 0 | 0   | 0  | 0  | 0   | 0  | 0 | 0  | 0 | 0  | 27 | 0   | 0  | 10 |   |

Supplementary Table 5

|                                         |   |   |   |   |    |    |   |    |    |    |    |    |     |    |    |    |    |    |
|-----------------------------------------|---|---|---|---|----|----|---|----|----|----|----|----|-----|----|----|----|----|----|
| Barnesiella_OTU#120                     | 0 | 0 | 0 | 0 | 0  | 0  | 0 | 0  | 0  | 0  | 0  | 0  | 0   | 0  | 0  | 0  | 0  | 1  |
| Paludibacter_OTU#121                    | 0 | 0 | 0 | 0 | 0  | 0  | 0 | 0  | 0  | 0  | 0  | 0  | 0   | 0  | 0  | 0  | 0  | 1  |
| Anaerophaga_OTU#122                     | 0 | 0 | 0 | 0 | 0  | 0  | 0 | 0  | 10 | 14 | 12 | 48 | 1   | 0  | 0  | 0  | 2  |    |
| Paludibacter_OTU#123                    | 0 | 0 | 0 | 0 | 26 | 20 | 9 | 17 | 4  | 60 | 94 | 48 | 112 | 51 | 54 | 54 | 16 | 45 |
| Paludibacter_OTU#124                    | 0 | 0 | 0 | 0 | 0  | 0  | 0 | 0  | 0  | 0  | 0  | 0  | 0   | 0  | 0  | 0  | 1  |    |
| Allobaculum_OTU#125                     | 0 | 0 | 0 | 0 | 0  | 0  | 0 | 0  | 4  | 5  | 5  | 3  | 4   | 2  | 0  | 5  | 6  |    |
| Anaerophaga_OTU#126                     | 0 | 0 | 0 | 0 | 1  | 3  | 1 | 1  | 0  | 0  | 0  | 1  | 10  | 1  | 0  | 0  | 4  |    |
| Limibacter_OTU#127                      | 0 | 0 | 0 | 0 | 0  | 0  | 0 | 0  | 0  | 0  | 0  | 0  | 0   | 0  | 0  | 0  | 1  |    |
| unclassified Porphyromonadaceae_OTU#128 | 0 | 0 | 0 | 0 | 0  | 0  | 0 | 1  | 0  | 0  | 0  | 0  | 0   | 1  | 0  | 0  | 2  |    |
| Barnesiella_OTU#129                     | 0 | 1 | 5 | 2 | 8  | 15 | 3 | 9  | 7  | 12 | 6  | 7  | 10  | 2  | 0  | 0  | 1  | 3  |
| Paludibacter_OTU#130                    | 0 | 0 | 0 | 0 | 0  | 0  | 0 | 0  | 0  | 0  | 0  | 0  | 0   | 0  | 0  | 0  | 1  |    |
| Limibacter_OTU#131                      | 0 | 0 | 0 | 0 | 0  | 0  | 0 | 0  | 0  | 0  | 0  | 0  | 0   | 0  | 0  | 0  | 1  |    |
| Tannerella_OTU#132                      | 0 | 0 | 0 | 0 | 0  | 0  | 0 | 1  | 0  | 0  | 0  | 1  | 3   | 1  | 0  | 0  | 4  |    |
| Paludibacter_OTU#133                    | 0 | 0 | 0 | 0 | 0  | 0  | 0 | 0  | 0  | 0  | 0  | 0  | 0   | 2  | 0  | 0  | 4  |    |
| Paludibacter_OTU#134                    | 0 | 0 | 0 | 0 | 0  | 0  | 0 | 0  | 0  | 0  | 0  | 0  | 0   | 0  | 0  | 0  | 1  |    |
| Paludibacter_OTU#135                    | 0 | 0 | 0 | 0 | 0  | 0  | 0 | 0  | 0  | 0  | 0  | 0  | 0   | 0  | 0  | 1  | 1  |    |
| Limibacter_OTU#136                      | 0 | 1 | 1 | 3 | 0  | 0  | 0 | 0  | 0  | 0  | 0  | 0  | 0   | 3  | 0  | 0  | 1  | 4  |
| Limibacter_OTU#137                      | 0 | 0 | 0 | 0 | 0  | 0  | 0 | 0  | 0  | 0  | 0  | 0  | 0   | 0  | 0  | 0  | 1  | 1  |
| Paludibacter_OTU#138                    | 0 | 3 | 3 | 1 | 1  | 0  | 0 | 0  | 0  | 2  | 6  | 14 | 15  | 1  | 0  | 0  | 0  | 1  |
| Paludibacter_OTU#139                    | 0 | 0 | 0 | 0 | 1  | 1  | 0 | 0  | 0  | 0  | 0  | 0  | 0   | 0  | 0  | 0  | 2  |    |
| Paludibacter_OTU#140                    | 0 | 0 | 0 | 0 | 0  | 0  | 0 | 0  | 0  | 0  | 0  | 0  | 0   | 0  | 3  | 0  | 1  |    |
| Paludibacter_OTU#141                    | 0 | 0 | 0 | 0 | 0  | 0  | 0 | 0  | 0  | 0  | 0  | 0  | 0   | 0  | 0  | 0  | 1  |    |
| Limibacter_OTU#142                      | 0 | 0 | 0 | 0 | 0  | 0  | 0 | 0  | 0  | 0  | 0  | 0  | 2   | 3  | 0  | 0  | 3  |    |
| Paludibacter_OTU#143                    | 0 | 0 | 0 | 0 | 0  | 0  | 0 | 0  | 0  | 0  | 0  | 1  | 4   | 7  | 6  | 1  | 3  |    |
| Paludibacter_OTU#144                    | 0 | 2 | 0 | 0 | 2  | 2  | 2 | 0  | 3  | 0  | 2  | 0  | 5   | 3  | 0  | 0  | 6  |    |
| Rikenella_OTU#145                       | 0 | 1 | 0 | 0 | 0  | 1  | 1 | 1  | 0  | 1  | 0  | 2  | 0   | 2  | 1  | 1  | 1  |    |
| Paludibacter_OTU#146                    | 0 | 0 | 1 | 0 | 0  | 1  | 0 | 1  | 0  | 0  | 1  | 1  | 0   | 0  | 0  | 0  | 2  |    |
| Paludibacter_OTU#147                    | 0 | 0 | 0 | 0 | 0  | 0  | 0 | 0  | 0  | 0  | 0  | 0  | 0   | 0  | 0  | 1  | 1  |    |
| Paludibacter_OTU#148                    | 0 | 5 | 5 | 2 | 0  | 3  | 2 | 1  | 0  | 0  | 0  | 0  | 4   | 0  | 0  | 0  | 4  |    |
| Limibacter_OTU#149                      | 0 | 4 | 0 | 1 | 0  | 0  | 0 | 3  | 0  | 2  | 0  | 5  | 1   | 2  | 0  | 0  | 2  |    |
| unclassified Bacteroidetes_OTU#150      | 0 | 0 | 0 | 0 | 0  | 0  | 0 | 0  | 0  | 0  | 0  | 0  | 0   | 1  | 0  | 0  | 1  |    |
| Paludibacter_OTU#151                    | 0 | 0 | 0 | 0 | 0  | 0  | 0 | 0  | 0  | 0  | 0  | 0  | 0   | 0  | 0  | 0  | 1  |    |
| Paludibacter_OTU#152                    | 0 | 0 | 0 | 0 | 0  | 0  | 0 | 0  | 0  | 0  | 0  | 0  | 0   | 0  | 0  | 0  | 1  |    |

Supplementary Table 5

|                                         |   |   |   |   |   |    |   |   |   |   |   |   |   |   |   |    |   |   |
|-----------------------------------------|---|---|---|---|---|----|---|---|---|---|---|---|---|---|---|----|---|---|
| unclassified Porphyromonadaceae_OTU#153 | 0 | 1 | 1 | 0 | 2 | 4  | 3 | 4 | 0 | 0 | 0 | 0 | 0 | 4 | 0 | 0  | 0 | 1 |
| Paludibacter_OTU#154                    | 0 | 3 | 4 | 4 | 4 | 24 | 3 | 5 | 2 | 1 | 1 | 3 | 5 | 1 | 2 | 53 | 6 | 2 |
| Salinihabitans_OTU#155                  | 0 | 0 | 0 | 0 | 0 | 0  | 0 | 0 | 0 | 0 | 0 | 0 | 0 | 0 | 0 | 0  | 1 |   |
| Paludibacter_OTU#156                    | 0 | 0 | 0 | 0 | 0 | 0  | 2 | 0 | 0 | 0 | 0 | 0 | 0 | 0 | 0 | 0  | 2 |   |
| Limibacter_OTU#157                      | 0 | 0 | 0 | 0 | 0 | 2  | 0 | 1 | 0 | 0 | 0 | 0 | 0 | 1 | 0 | 0  | 1 |   |
| Paludibacter_OTU#158                    | 0 | 0 | 0 | 0 | 0 | 0  | 0 | 2 | 0 | 0 | 1 | 2 | 1 | 4 | 0 | 0  | 2 |   |
| Paludibacter_OTU#159                    | 0 | 0 | 0 | 0 | 0 | 0  | 0 | 0 | 0 | 0 | 0 | 1 | 0 | 0 | 0 | 0  | 1 |   |
| Paludibacter_OTU#160                    | 0 | 0 | 0 | 0 | 0 | 0  | 0 | 0 | 0 | 0 | 0 | 0 | 0 | 0 | 0 | 0  | 1 |   |
| Paludibacter_OTU#161                    | 0 | 0 | 0 | 0 | 0 | 0  | 0 | 1 | 0 | 0 | 0 | 0 | 0 | 4 | 0 | 0  | 3 |   |
| Allobaculum_OTU#162                     | 0 | 0 | 0 | 0 | 0 | 0  | 0 | 0 | 0 | 0 | 0 | 0 | 0 | 0 | 0 | 0  | 1 |   |
| Rikenella_OTU#163                       | 0 | 0 | 0 | 0 | 0 | 0  | 0 | 0 | 0 | 0 | 0 | 0 | 0 | 0 | 0 | 2  | 1 |   |
| Limibacter_OTU#164                      | 0 | 0 | 0 | 0 | 1 | 0  | 0 | 0 | 0 | 0 | 0 | 0 | 0 | 0 | 0 | 0  | 1 |   |
| Salinihabitans_OTU#165                  | 0 | 0 | 0 | 0 | 1 | 1  | 0 | 0 | 0 | 0 | 1 | 0 | 0 | 0 | 1 | 14 | 3 |   |
| Barnesiella_OTU#166                     | 0 | 0 | 0 | 0 | 0 | 0  | 0 | 0 | 0 | 0 | 0 | 0 | 0 | 0 | 0 | 0  | 1 |   |
| Lactobacillus_OTU#167                   | 0 | 0 | 0 | 0 | 0 | 0  | 0 | 0 | 0 | 0 | 0 | 0 | 0 | 0 | 0 | 0  | 1 |   |
| Paludibacter_OTU#168                    | 0 | 0 | 0 | 0 | 0 | 0  | 0 | 0 | 0 | 0 | 0 | 0 | 0 | 0 | 0 | 0  | 1 |   |
| Paludibacter_OTU#169                    | 0 | 0 | 1 | 0 | 0 | 1  | 0 | 0 | 0 | 0 | 0 | 0 | 0 | 0 | 0 | 1  | 1 |   |
| Limibacter_OTU#170                      | 0 | 0 | 2 | 0 | 6 | 2  | 5 | 2 | 0 | 0 | 0 | 0 | 0 | 0 | 0 | 0  | 2 |   |
| Limibacter_OTU#171                      | 0 | 0 | 0 | 0 | 0 | 0  | 0 | 0 | 0 | 0 | 0 | 0 | 0 | 0 | 0 | 0  | 1 |   |
| Rikenella_OTU#172                       | 0 | 0 | 0 | 0 | 0 | 0  | 0 | 0 | 0 | 0 | 0 | 0 | 0 | 0 | 0 | 0  | 1 |   |
| Limibacter_OTU#173                      | 0 | 0 | 0 | 0 | 0 | 0  | 0 | 0 | 0 | 0 | 0 | 0 | 0 | 0 | 0 | 0  | 1 |   |
| Limibacter_OTU#174                      | 0 | 0 | 1 | 0 | 0 | 0  | 0 | 0 | 0 | 0 | 0 | 0 | 0 | 0 | 0 | 0  | 1 |   |
| Tannerella_OTU#175                      | 0 | 0 | 0 | 0 | 2 | 0  | 0 | 0 | 2 | 0 | 1 | 0 | 1 | 2 | 0 | 0  | 2 |   |
| Hallella_OTU#176                        | 0 | 0 | 0 | 0 | 0 | 0  | 0 | 0 | 0 | 0 | 0 | 0 | 0 | 0 | 0 | 0  | 1 |   |
| Limibacter_OTU#177                      | 0 | 1 | 1 | 1 | 0 | 0  | 0 | 0 | 0 | 0 | 0 | 0 | 0 | 0 | 0 | 0  | 2 |   |
| Barnesiella_OTU#178                     | 0 | 0 | 0 | 0 | 0 | 0  | 0 | 0 | 0 | 0 | 0 | 0 | 1 | 3 | 0 | 0  | 1 |   |
| Lachnobacterium_OTU#179                 | 0 | 0 | 0 | 0 | 0 | 0  | 0 | 0 | 0 | 0 | 0 | 0 | 0 | 0 | 0 | 0  | 1 |   |
| Paludibacter_OTU#180                    | 0 | 0 | 0 | 0 | 0 | 0  | 0 | 0 | 0 | 0 | 0 | 0 | 0 | 0 | 0 | 0  | 1 |   |
| Anaerophaga_OTU#181                     | 0 | 0 | 0 | 0 | 0 | 0  | 0 | 1 | 0 | 0 | 0 | 0 | 0 | 0 | 0 | 1  | 1 |   |
| Paludibacter_OTU#182                    | 0 | 0 | 0 | 0 | 1 | 0  | 2 | 2 | 1 | 0 | 0 | 0 | 0 | 4 | 1 | 0  | 1 |   |
| Paludibacter_OTU#183                    | 0 | 0 | 0 | 0 | 0 | 0  | 0 | 0 | 0 | 2 | 1 | 1 | 0 | 0 | 0 | 0  | 1 |   |
| Limibacter_OTU#184                      | 0 | 3 | 1 | 3 | 5 | 3  | 4 | 7 | 2 | 0 | 0 | 0 | 1 | 1 | 0 | 0  | 2 |   |
| Rikenella_OTU#185                       | 0 | 0 | 0 | 0 | 1 | 1  | 0 | 0 | 0 | 0 | 0 | 1 | 0 | 0 | 0 | 2  | 1 |   |

Supplementary Table 5

|                                    |   |   |   |   |   |   |   |   |   |   |   |   |   |   |   |   |   |
|------------------------------------|---|---|---|---|---|---|---|---|---|---|---|---|---|---|---|---|---|
| Paludibacter_OTU#186               | 0 | 0 | 0 | 0 | 0 | 0 | 1 | 0 | 0 | 0 | 0 | 0 | 0 | 0 | 0 | 0 | 1 |
| Bulleidia_OTU#187                  | 0 | 0 | 0 | 0 | 0 | 0 | 0 | 0 | 0 | 0 | 0 | 0 | 0 | 0 | 0 | 0 | 1 |
| Paludibacter_OTU#188               | 0 | 0 | 0 | 0 | 0 | 0 | 0 | 0 | 0 | 0 | 0 | 0 | 0 | 0 | 0 | 0 | 1 |
| Barnesiella_OTU#189                | 0 | 0 | 0 | 0 | 4 | 0 | 1 | 0 | 0 | 0 | 0 | 0 | 2 | 0 | 0 | 0 | 1 |
| Barnesiella_OTU#190                | 0 | 0 | 0 | 0 | 0 | 0 | 0 | 0 | 0 | 1 | 0 | 0 | 0 | 0 | 0 | 0 | 1 |
| unclassified Bacteroidales_OTU#191 | 0 | 0 | 1 | 0 | 0 | 1 | 0 | 0 | 0 | 0 | 1 | 0 | 0 | 0 | 0 | 0 | 1 |
| Limibacter_OTU#192                 | 0 | 0 | 0 | 0 | 0 | 0 | 0 | 0 | 0 | 0 | 0 | 0 | 0 | 0 | 0 | 0 | 2 |
| unclassified TM7_OTU#193           | 0 | 0 | 0 | 0 | 0 | 0 | 0 | 0 | 0 | 0 | 0 | 0 | 0 | 0 | 0 | 0 | 1 |
| Tannerella_OTU#194                 | 0 | 0 | 1 | 0 | 0 | 0 | 0 | 0 | 0 | 0 | 0 | 0 | 0 | 0 | 0 | 0 | 1 |
| Limibacter_OTU#195                 | 0 | 0 | 0 | 0 | 0 | 0 | 0 | 0 | 0 | 0 | 0 | 0 | 0 | 0 | 0 | 0 | 1 |
| Paludibacter_OTU#196               | 0 | 0 | 0 | 0 | 0 | 0 | 0 | 0 | 0 | 0 | 0 | 0 | 1 | 1 | 1 | 0 | 1 |
| Paludibacter_OTU#197               | 0 | 0 | 0 | 0 | 1 | 0 | 1 | 0 | 0 | 1 | 0 | 0 | 0 | 2 | 0 | 0 | 1 |
| Paludibacter_OTU#198               | 0 | 0 | 0 | 0 | 3 | 0 | 0 | 0 | 0 | 0 | 0 | 0 | 1 | 0 | 0 | 0 | 1 |
| Anaerophaga_OTU#199                | 0 | 1 | 0 | 0 | 0 | 0 | 0 | 2 | 0 | 0 | 1 | 1 | 0 | 0 | 1 | 0 | 1 |
| Barnesiella_OTU#200                | 0 | 0 | 0 | 0 | 1 | 0 | 0 | 0 | 0 | 0 | 0 | 1 | 0 | 1 | 0 | 0 | 1 |
| Barnesiella_OTU#201                | 0 | 0 | 0 | 0 | 0 | 0 | 0 | 0 | 0 | 0 | 0 | 0 | 0 | 0 | 0 | 0 | 1 |
| Anaerophaga_OTU#202                | 0 | 1 | 2 | 0 | 0 | 0 | 0 | 0 | 2 | 1 | 2 | 4 | 0 | 0 | 1 | 0 | 1 |
| Limibacter_OTU#203                 | 0 | 0 | 0 | 0 | 0 | 0 | 0 | 0 | 0 | 0 | 0 | 0 | 0 | 0 | 0 | 0 | 1 |
| Paludibacter_OTU#204               | 0 | 0 | 0 | 0 | 0 | 0 | 0 | 0 | 0 | 0 | 0 | 0 | 1 | 0 | 0 | 0 | 1 |
| Paludibacter_OTU#205               | 0 | 0 | 0 | 0 | 0 | 0 | 0 | 0 | 0 | 0 | 0 | 0 | 0 | 0 | 0 | 0 | 1 |
| Limibacter_OTU#206                 | 0 | 0 | 0 | 0 | 0 | 0 | 0 | 0 | 0 | 0 | 0 | 0 | 0 | 0 | 0 | 0 | 1 |
| Paludibacter_OTU#207               | 0 | 1 | 1 | 0 | 1 | 0 | 0 | 0 | 0 | 0 | 0 | 0 | 0 | 0 | 0 | 0 | 1 |
| Barnesiella_OTU#208                | 0 | 0 | 0 | 0 | 0 | 0 | 0 | 0 | 0 | 0 | 2 | 2 | 1 | 0 | 0 | 0 | 1 |
| Paludibacter_OTU#209               | 0 | 5 | 0 | 0 | 0 | 0 | 0 | 0 | 0 | 0 | 0 | 0 | 0 | 0 | 0 | 0 | 1 |
| Tannerella_OTU#210                 | 0 | 0 | 0 | 0 | 0 | 0 | 0 | 0 | 0 | 0 | 0 | 0 | 0 | 0 | 0 | 0 | 1 |
| Paludibacter_OTU#211               | 0 | 0 | 0 | 0 | 0 | 0 | 0 | 0 | 0 | 1 | 0 | 0 | 1 | 1 | 1 | 0 | 2 |
| Rikenella_OTU#212                  | 0 | 2 | 0 | 0 | 0 | 4 | 1 | 1 | 2 | 0 | 0 | 0 | 3 | 1 | 7 | 2 | 1 |
| Paludibacter_OTU#213               | 0 | 0 | 0 | 0 | 0 | 1 | 0 | 0 | 0 | 1 | 0 | 3 | 1 | 1 | 0 | 0 | 2 |
| Barnesiella_OTU#214                | 0 | 0 | 0 | 0 | 0 | 0 | 0 | 0 | 0 | 0 | 0 | 0 | 0 | 0 | 0 | 0 | 1 |
| Limibacter_OTU#215                 | 0 | 0 | 0 | 1 | 0 | 0 | 1 | 0 | 0 | 0 | 0 | 0 | 0 | 0 | 0 | 0 | 1 |
| Limibacter_OTU#216                 | 0 | 0 | 0 | 0 | 0 | 0 | 0 | 0 | 0 | 0 | 0 | 0 | 0 | 0 | 0 | 0 | 1 |
| unclassified Bacteroidales_OTU#217 | 0 | 0 | 0 | 0 | 0 | 0 | 0 | 0 | 0 | 1 | 0 | 0 | 0 | 0 | 0 | 0 | 1 |
| Paludibacter_OTU#218               | 0 | 0 | 0 | 0 | 1 | 1 | 0 | 1 | 0 | 0 | 0 | 0 | 3 | 0 | 0 | 0 | 1 |

Supplementary Table 5



|                         |   |   |    |   |    |    |    |    |    |   |   |   |   |   |   |   |     |   |
|-------------------------|---|---|----|---|----|----|----|----|----|---|---|---|---|---|---|---|-----|---|
| Limibacter_OTU#219      | 0 | 0 | 0  | 0 | 0  | 0  | 0  | 0  | 0  | 0 | 0 | 0 | 0 | 0 | 0 | 0 | 0   | 1 |
| Paludibacter_OTU#220    | 0 | 0 | 0  | 0 | 0  | 0  | 0  | 0  | 0  | 0 | 0 | 1 | 2 | 2 | 0 | 0 | 0   | 1 |
| Dichelobacter_OTU#221   | 0 | 0 | 0  | 0 | 24 | 6  | 35 | 15 | 2  | 0 | 0 | 0 | 0 | 0 | 0 | 0 | 0   | 0 |
| Paludibacter_OTU#222    | 0 | 0 | 0  | 0 | 1  | 0  | 0  | 0  | 0  | 0 | 0 | 0 | 0 | 0 | 0 | 0 | 0   | 0 |
| Limibacter_OTU#223      | 0 | 0 | 0  | 0 | 1  | 0  | 0  | 0  | 0  | 0 | 0 | 0 | 0 | 0 | 0 | 0 | 0   | 0 |
| Limibacter_OTU#224      | 0 | 0 | 1  | 0 | 4  | 4  | 2  | 5  | 1  | 0 | 0 | 0 | 0 | 0 | 0 | 0 | 0   | 0 |
| Sporacetigenium_OTU#225 | 0 | 0 | 0  | 0 | 3  | 0  | 0  | 0  | 1  | 0 | 0 | 0 | 0 | 1 | 0 | 3 | 232 | 0 |
| Limibacter_OTU#226      | 0 | 2 | 11 | 7 | 65 | 51 | 23 | 37 | 13 | 0 | 0 | 0 | 0 | 3 | 0 | 0 | 1   | 0 |
| Rikenella_OTU#227       | 0 | 0 | 0  | 0 | 6  | 0  | 2  | 1  | 1  | 0 | 0 | 0 | 0 | 0 | 0 | 0 | 0   | 0 |
| Paludibacter_OTU#228    | 0 | 0 | 0  | 0 | 1  | 0  | 0  | 0  | 0  | 0 | 0 | 0 | 0 | 0 | 0 | 0 | 0   | 0 |
| Hallella_OTU#229        | 0 | 0 | 0  | 0 | 1  | 0  | 0  | 0  | 0  | 0 | 0 | 0 | 0 | 0 | 0 | 0 | 0   | 0 |
| Barnesiella_OTU#230     | 0 | 3 | 5  | 3 | 7  | 0  | 4  | 2  | 4  | 0 | 0 | 0 | 0 | 0 | 0 | 0 | 0   | 0 |
| Parasutterella_OTU#231  | 0 | 0 | 0  | 0 | 1  | 0  | 0  | 0  | 0  | 0 | 0 | 0 | 0 | 0 | 0 | 0 | 0   | 0 |
| Parasutterella_OTU#232  | 0 | 0 | 0  | 0 | 1  | 0  | 0  | 0  | 0  | 0 | 0 | 0 | 0 | 0 | 0 | 0 | 0   | 0 |
| Blautia_OTU#233         | 0 | 0 | 0  | 0 | 9  | 0  | 0  | 0  | 0  | 0 | 0 | 0 | 0 | 0 | 0 | 7 | 7   | 0 |
| Paludibacter_OTU#234    | 0 | 0 | 4  | 0 | 2  | 0  | 2  | 0  | 0  | 0 | 0 | 0 | 0 | 0 | 0 | 0 | 0   | 0 |
| Rikenella_OTU#235       | 0 | 0 | 0  | 0 | 1  | 0  | 0  | 0  | 0  | 0 | 0 | 0 | 0 | 0 | 0 | 0 | 0   | 0 |
| Barnesiella_OTU#236     | 0 | 0 | 1  | 0 | 3  | 0  | 0  | 0  | 0  | 0 | 0 | 0 | 0 | 0 | 0 | 0 | 0   | 0 |
| Paludibacter_OTU#237    | 0 | 0 | 0  | 0 | 1  | 1  | 0  | 0  | 0  | 0 | 0 | 0 | 0 | 0 | 0 | 0 | 0   | 0 |
| Anaerophaga_OTU#238     | 0 | 0 | 0  | 0 | 1  | 0  | 0  | 0  | 0  | 0 | 0 | 0 | 0 | 0 | 0 | 0 | 0   | 0 |
| Parasutterella_OTU#239  | 0 | 2 | 0  | 0 | 3  | 3  | 3  | 1  | 0  | 0 | 0 | 0 | 0 | 0 | 0 | 0 | 0   | 0 |
| Barnesiella_OTU#240     | 0 | 0 | 0  | 0 | 1  | 0  | 0  | 0  | 0  | 0 | 0 | 0 | 0 | 0 | 0 | 0 | 0   | 0 |
| Paludibacter_OTU#241    | 0 | 0 | 0  | 0 | 1  | 0  | 0  | 0  | 0  | 0 | 0 | 0 | 0 | 0 | 0 | 0 | 0   | 0 |
| Limibacter_OTU#242      | 0 | 0 | 0  | 0 | 2  | 0  | 0  | 0  | 1  | 0 | 0 | 0 | 0 | 0 | 0 | 0 | 0   | 0 |
| Barnesiella_OTU#243     | 0 | 0 | 0  | 0 | 1  | 0  | 0  | 0  | 0  | 0 | 0 | 0 | 0 | 0 | 0 | 0 | 0   | 0 |
| Rikenella_OTU#244       | 0 | 0 | 0  | 0 | 1  | 0  | 0  | 0  | 0  | 0 | 0 | 0 | 0 | 0 | 0 | 0 | 0   | 0 |
| Anaerostipes_OTU#245    | 0 | 0 | 0  | 0 | 2  | 0  | 0  | 0  | 0  | 1 | 0 | 0 | 0 | 0 | 1 | 2 | 1   | 0 |
| Anaerophaga_OTU#246     | 0 | 0 | 1  | 1 | 6  | 0  | 0  | 4  | 0  | 0 | 0 | 0 | 0 | 0 | 0 | 0 | 0   | 0 |
| Paludibacter_OTU#247    | 0 | 0 | 0  | 0 | 3  | 0  | 0  | 0  | 0  | 0 | 0 | 1 | 1 | 0 | 0 | 0 | 0   | 0 |
| Anaerophaga_OTU#248     | 0 | 0 | 0  | 0 | 1  | 0  | 0  | 0  | 0  | 0 | 0 | 0 | 0 | 0 | 0 | 0 | 0   | 0 |
| Limibacter_OTU#249      | 0 | 0 | 0  | 0 | 1  | 1  | 0  | 0  | 0  | 0 | 0 | 0 | 0 | 0 | 0 | 0 | 0   | 0 |
| Limibacter_OTU#250      | 0 | 0 | 0  | 0 | 1  | 0  | 0  | 0  | 0  | 0 | 0 | 0 | 0 | 0 | 0 | 0 | 0   | 0 |
| Anaerophaga_OTU#251     | 0 | 1 | 0  | 3 | 3  | 1  | 3  | 1  | 1  | 0 | 0 | 0 | 0 | 0 | 0 | 0 | 0   | 0 |

Supplementary Table 5

|                                         |   |   |   |   |   |   |    |    |   |   |   |   |   |   |   |   |   |   |
|-----------------------------------------|---|---|---|---|---|---|----|----|---|---|---|---|---|---|---|---|---|---|
| Paludibacter_OTU#252                    | 0 | 0 | 0 | 0 | 2 | 0 | 1  | 0  | 0 | 0 | 0 | 0 | 0 | 0 | 0 | 0 | 0 | 0 |
| Paludibacter_OTU#253                    | 0 | 0 | 0 | 0 | 1 | 0 | 0  | 0  | 0 | 0 | 0 | 0 | 0 | 0 | 0 | 0 | 0 | 0 |
| Parasutterella_OTU#254                  | 0 | 0 | 0 | 0 | 1 | 0 | 0  | 1  | 0 | 0 | 0 | 0 | 0 | 0 | 0 | 0 | 0 | 0 |
| Barnesiella_OTU#255                     | 0 | 0 | 0 | 0 | 1 | 0 | 0  | 0  | 0 | 0 | 0 | 0 | 0 | 0 | 0 | 0 | 0 | 0 |
| Allobaculum_OTU#256                     | 0 | 0 | 0 | 0 | 1 | 5 | 10 | 12 | 1 | 0 | 0 | 0 | 0 | 0 | 0 | 0 | 0 | 0 |
| Parasutterella_OTU#257                  | 0 | 5 | 0 | 0 | 2 | 1 | 6  | 5  | 0 | 0 | 0 | 0 | 0 | 0 | 0 | 0 | 0 | 0 |
| Parasutterella_OTU#258                  | 0 | 0 | 0 | 0 | 1 | 0 | 0  | 0  | 0 | 0 | 0 | 0 | 0 | 0 | 0 | 0 | 0 | 0 |
| Barnesiella_OTU#259                     | 0 | 0 | 0 | 0 | 2 | 0 | 0  | 0  | 0 | 0 | 0 | 0 | 0 | 0 | 0 | 0 | 0 | 0 |
| Barnesiella_OTU#260                     | 0 | 0 | 0 | 0 | 1 | 0 | 0  | 0  | 0 | 0 | 0 | 0 | 0 | 0 | 0 | 0 | 0 | 0 |
| Paludibacter_OTU#261                    | 0 | 3 | 4 | 1 | 3 | 1 | 2  | 1  | 0 | 0 | 0 | 0 | 0 | 0 | 0 | 0 | 0 | 0 |
| Paludibacter_OTU#262                    | 0 | 0 | 0 | 0 | 1 | 1 | 1  | 0  | 0 | 0 | 0 | 0 | 0 | 0 | 0 | 0 | 0 | 0 |
| Acetitomaculum_OTU#263                  | 0 | 0 | 0 | 0 | 2 | 0 | 0  | 0  | 0 | 2 | 0 | 0 | 0 | 0 | 0 | 0 | 0 | 0 |
| Dichelobacter_OTU#264                   | 0 | 0 | 0 | 0 | 1 | 0 | 0  | 0  | 0 | 0 | 0 | 0 | 0 | 0 | 0 | 0 | 0 | 0 |
| Paludibacter_OTU#265                    | 0 | 0 | 1 | 0 | 1 | 0 | 0  | 0  | 0 | 0 | 0 | 0 | 0 | 0 | 0 | 0 | 0 | 0 |
| unclassified Porphyromonadaceae_OTU#266 | 0 | 1 | 1 | 3 | 2 | 0 | 5  | 1  | 0 | 0 | 0 | 0 | 0 | 0 | 0 | 0 | 0 | 0 |
| Limibacter_OTU#267                      | 0 | 0 | 0 | 0 | 1 | 1 | 0  | 0  | 0 | 0 | 0 | 0 | 0 | 0 | 0 | 0 | 0 | 0 |
| Barnesiella_OTU#268                     | 0 | 0 | 0 | 0 | 1 | 0 | 0  | 0  | 0 | 0 | 0 | 0 | 0 | 0 | 0 | 0 | 0 | 0 |
| Tannerella_OTU#269                      | 0 | 0 | 0 | 0 | 1 | 0 | 0  | 0  | 0 | 0 | 0 | 0 | 0 | 0 | 0 | 0 | 0 | 0 |
| Paludibacter_OTU#270                    | 0 | 6 | 1 | 3 | 1 | 2 | 1  | 1  | 3 | 0 | 0 | 0 | 0 | 0 | 0 | 0 | 0 | 0 |
| Anaerophaga_OTU#271                     | 0 | 0 | 0 | 0 | 1 | 0 | 0  | 0  | 0 | 0 | 0 | 0 | 0 | 0 | 0 | 0 | 0 | 0 |
| Paludibacter_OTU#272                    | 0 | 0 | 1 | 0 | 1 | 1 | 2  | 0  | 0 | 0 | 0 | 0 | 0 | 0 | 0 | 0 | 0 | 0 |
| Limibacter_OTU#273                      | 0 | 0 | 0 | 0 | 1 | 0 | 0  | 0  | 0 | 0 | 0 | 0 | 0 | 0 | 0 | 0 | 0 | 0 |
| Parasutterella_OTU#274                  | 0 | 0 | 0 | 0 | 1 | 0 | 1  | 0  | 0 | 0 | 0 | 0 | 0 | 0 | 0 | 0 | 0 | 0 |
| Lactobacillus_OTU#275                   | 0 | 1 | 1 | 0 | 1 | 2 | 0  | 0  | 0 | 3 | 2 | 8 | 3 | 0 | 0 | 0 | 0 | 0 |
| Rikenella_OTU#276                       | 0 | 0 | 0 | 0 | 2 | 0 | 1  | 0  | 0 | 0 | 0 | 0 | 0 | 0 | 0 | 1 | 0 | 0 |
| Anaerophaga_OTU#277                     | 0 | 0 | 2 | 0 | 2 | 0 | 2  | 4  | 3 | 0 | 0 | 0 | 0 | 0 | 0 | 0 | 0 | 0 |
| Tannerella_OTU#278                      | 0 | 0 | 1 | 0 | 1 | 1 | 1  | 3  | 0 | 0 | 0 | 0 | 0 | 1 | 0 | 0 | 0 | 0 |
| Dichelobacter_OTU#279                   | 0 | 0 | 0 | 0 | 1 | 0 | 0  | 0  | 0 | 0 | 0 | 0 | 0 | 0 | 0 | 0 | 0 | 0 |
| Rikenella_OTU#280                       | 0 | 0 | 1 | 0 | 1 | 0 | 0  | 0  | 0 | 0 | 0 | 0 | 0 | 0 | 0 | 0 | 0 | 0 |
| Paludibacter_OTU#281                    | 0 | 0 | 0 | 0 | 1 | 0 | 0  | 0  | 0 | 0 | 0 | 0 | 0 | 0 | 0 | 0 | 0 | 0 |
| Barnesiella_OTU#282                     | 0 | 0 | 0 | 0 | 1 | 0 | 0  | 0  | 0 | 0 | 0 | 0 | 0 | 0 | 0 | 0 | 0 | 0 |
| Anaerophaga_OTU#283                     | 0 | 0 | 0 | 2 | 1 | 0 | 1  | 0  | 1 | 0 | 0 | 0 | 0 | 0 | 0 | 0 | 0 | 0 |
| Anaerophaga_OTU#284                     | 0 | 0 | 0 | 0 | 1 | 0 | 0  | 0  | 0 | 0 | 0 | 0 | 0 | 0 | 0 | 0 | 0 | 0 |

Supplementary Table 5

|                                         |   |   |   |   |   |   |   |   |   |   |   |   |   |   |   |   |   |   |
|-----------------------------------------|---|---|---|---|---|---|---|---|---|---|---|---|---|---|---|---|---|---|
| Paludibacter_OTU#285                    | 0 | 0 | 0 | 0 | 1 | 0 | 0 | 0 | 0 | 0 | 0 | 0 | 0 | 0 | 0 | 0 | 0 | 0 |
| unclassified Porphyromonadaceae_OTU#286 | 0 | 0 | 0 | 0 | 1 | 0 | 0 | 0 | 1 | 0 | 0 | 0 | 2 | 0 | 0 | 0 | 0 | 0 |
| Barnesiella_OTU#287                     | 0 | 1 | 0 | 0 | 1 | 0 | 0 | 0 | 0 | 0 | 0 | 0 | 0 | 0 | 0 | 0 | 0 | 0 |
| Enterorhabdus_OTU#288                   | 0 | 0 | 0 | 0 | 1 | 1 | 0 | 0 | 0 | 0 | 0 | 0 | 0 | 0 | 0 | 0 | 0 | 0 |
| Anaerophaga_OTU#289                     | 0 | 0 | 0 | 0 | 1 | 0 | 0 | 0 | 0 | 0 | 0 | 0 | 0 | 0 | 0 | 0 | 0 | 0 |
| Robinsoniella_OTU#290                   | 0 | 0 | 0 | 0 | 1 | 0 | 0 | 0 | 0 | 0 | 0 | 0 | 0 | 0 | 0 | 0 | 0 | 0 |
| Paludibacter_OTU#291                    | 0 | 0 | 0 | 0 | 1 | 0 | 0 | 0 | 0 | 0 | 0 | 0 | 0 | 0 | 0 | 0 | 0 | 0 |
| Tannerella_OTU#292                      | 0 | 0 | 0 | 0 | 1 | 0 | 0 | 0 | 0 | 0 | 0 | 0 | 0 | 1 | 0 | 0 | 0 | 0 |
| Limibacter_OTU#293                      | 0 | 0 | 0 | 0 | 1 | 0 | 1 | 0 | 0 | 0 | 0 | 0 | 0 | 0 | 0 | 0 | 0 | 0 |
| Paludibacter_OTU#294                    | 0 | 0 | 0 | 0 | 1 | 0 | 0 | 0 | 0 | 0 | 0 | 0 | 0 | 0 | 0 | 0 | 0 | 0 |
| Rikenella_OTU#295                       | 0 | 0 | 0 | 0 | 1 | 0 | 0 | 0 | 0 | 0 | 0 | 0 | 0 | 0 | 0 | 0 | 0 | 0 |
| Paludibacter_OTU#296                    | 0 | 0 | 0 | 0 | 1 | 0 | 0 | 2 | 0 | 0 | 0 | 0 | 0 | 0 | 0 | 0 | 0 | 0 |
| Limibacter_OTU#297                      | 0 | 0 | 0 | 0 | 1 | 0 | 0 | 0 | 0 | 0 | 0 | 0 | 0 | 0 | 0 | 0 | 0 | 0 |
| Lachnobacterium_OTU#298                 | 0 | 0 | 1 | 4 | 1 | 0 | 0 | 1 | 0 | 2 | 3 | 3 | 0 | 0 | 0 | 0 | 0 | 0 |
| Rikenella_OTU#299                       | 0 | 0 | 0 | 0 | 1 | 0 | 0 | 0 | 0 | 0 | 0 | 0 | 0 | 0 | 0 | 0 | 0 | 0 |
| Barnesiella_OTU#300                     | 0 | 0 | 0 | 1 | 1 | 1 | 1 | 0 | 0 | 1 | 0 | 0 | 2 | 1 | 4 | 4 | 0 | 0 |
| Limibacter_OTU#301                      | 0 | 0 | 0 | 0 | 1 | 1 | 1 | 2 | 2 | 0 | 0 | 0 | 0 | 0 | 0 | 0 | 0 | 0 |
| Paludibacter_OTU#302                    | 0 | 0 | 0 | 0 | 1 | 0 | 0 | 0 | 0 | 0 | 0 | 0 | 0 | 0 | 0 | 0 | 0 | 0 |
| Paludibacter_OTU#303                    | 0 | 0 | 0 | 0 | 1 | 0 | 0 | 0 | 0 | 0 | 0 | 0 | 0 | 0 | 0 | 0 | 0 | 0 |
| Paludibacter_OTU#304                    | 0 | 0 | 0 | 0 | 1 | 0 | 2 | 1 | 0 | 0 | 0 | 0 | 0 | 0 | 0 | 0 | 0 | 0 |
| Paludibacter_OTU#305                    | 0 | 0 | 0 | 0 | 1 | 0 | 0 | 0 | 0 | 0 | 0 | 0 | 0 | 0 | 0 | 0 | 0 | 0 |
| Limibacter_OTU#306                      | 0 | 1 | 1 | 0 | 1 | 0 | 0 | 0 | 0 | 0 | 0 | 0 | 0 | 1 | 0 | 0 | 0 | 0 |
| Paludibacter_OTU#307                    | 0 | 1 | 0 | 0 | 1 | 1 | 0 | 2 | 0 | 0 | 1 | 0 | 0 | 1 | 0 | 0 | 0 | 0 |
| Rikenella_OTU#308                       | 0 | 0 | 0 | 0 | 1 | 0 | 0 | 0 | 0 | 0 | 0 | 0 | 0 | 0 | 0 | 0 | 0 | 0 |
| unclassified Bacteroidetes_OTU#309      | 0 | 0 | 0 | 0 | 2 | 0 | 0 | 0 | 0 | 0 | 0 | 0 | 0 | 0 | 0 | 0 | 0 | 0 |
| Paludibacter_OTU#310                    | 0 | 0 | 0 | 0 | 1 | 0 | 0 | 0 | 0 | 0 | 0 | 0 | 0 | 0 | 0 | 0 | 0 | 0 |
| Limibacter_OTU#311                      | 0 | 0 | 0 | 0 | 1 | 0 | 0 | 0 | 0 | 0 | 0 | 0 | 0 | 0 | 0 | 0 | 0 | 0 |
| unclassified Bacteroidales_OTU#312      | 0 | 0 | 0 | 0 | 1 | 0 | 0 | 0 | 0 | 0 | 0 | 1 | 0 | 0 | 0 | 0 | 0 | 0 |
| Dichelobacter_OTU#313                   | 0 | 0 | 0 | 0 | 1 | 0 | 0 | 0 | 0 | 0 | 0 | 0 | 0 | 0 | 0 | 0 | 0 | 0 |
| Parasutterella_OTU#314                  | 0 | 0 | 0 | 0 | 0 | 0 | 0 | 0 | 0 | 0 | 0 | 1 | 0 | 2 | 0 | 0 | 0 | 0 |
| Allobaculum_OTU#315                     | 0 | 0 | 0 | 0 | 0 | 0 | 0 | 0 | 0 | 0 | 0 | 0 | 0 | 1 | 0 | 0 | 0 | 0 |
| Barnesiella_OTU#316                     | 0 | 0 | 1 | 0 | 0 | 0 | 0 | 0 | 0 | 0 | 0 | 1 | 1 | 2 | 1 | 0 | 0 | 0 |
| Paludibacter_OTU#317                    | 0 | 1 | 0 | 0 | 0 | 0 | 0 | 0 | 0 | 0 | 0 | 0 | 0 | 2 | 0 | 0 | 0 | 0 |

Supplementary Table 5

|                                         |   |   |   |   |   |   |   |   |   |   |   |   |   |   |   |   |   |   |
|-----------------------------------------|---|---|---|---|---|---|---|---|---|---|---|---|---|---|---|---|---|---|
| Anaerophaga_OTU#318                     | 0 | 0 | 0 | 0 | 0 | 0 | 0 | 0 | 0 | 0 | 0 | 1 | 0 | 1 | 0 | 0 | 0 | 0 |
| Paludibacter_OTU#319                    | 0 | 0 | 0 | 0 | 0 | 2 | 1 | 0 | 0 | 0 | 0 | 0 | 0 | 3 | 0 | 1 | 0 | 0 |
| Pseudozobellia_OTU#320                  | 0 | 1 | 0 | 0 | 0 | 0 | 0 | 0 | 0 | 0 | 0 | 0 | 0 | 1 | 0 | 0 | 0 | 0 |
| Paludibacter_OTU#321                    | 0 | 0 | 0 | 0 | 0 | 1 | 0 | 0 | 0 | 0 | 0 | 0 | 0 | 1 | 0 | 0 | 0 | 0 |
| Limibacter_OTU#322                      | 0 | 0 | 0 | 0 | 0 | 0 | 0 | 0 | 0 | 0 | 0 | 0 | 0 | 1 | 0 | 0 | 0 | 0 |
| Limibacter_OTU#323                      | 0 | 0 | 0 | 0 | 0 | 0 | 0 | 0 | 0 | 0 | 0 | 0 | 0 | 1 | 0 | 0 | 0 | 0 |
| Barnesiella_OTU#324                     | 0 | 0 | 0 | 0 | 0 | 0 | 0 | 0 | 0 | 0 | 0 | 0 | 0 | 1 | 0 | 0 | 0 | 0 |
| Butyricimonas_OTU#325                   | 0 | 0 | 0 | 0 | 0 | 0 | 0 | 0 | 0 | 0 | 0 | 0 | 0 | 1 | 0 | 0 | 0 | 0 |
| Paludibacter_OTU#326                    | 0 | 0 | 0 | 0 | 0 | 0 | 0 | 0 | 1 | 0 | 0 | 0 | 0 | 1 | 0 | 0 | 0 | 0 |
| Paludibacter_OTU#327                    | 0 | 0 | 0 | 0 | 0 | 0 | 0 | 0 | 0 | 0 | 0 | 0 | 0 | 1 | 0 | 0 | 0 | 0 |
| Rikenella_OTU#328                       | 0 | 0 | 0 | 0 | 0 | 0 | 0 | 0 | 0 | 0 | 0 | 0 | 0 | 1 | 0 | 0 | 0 | 0 |
| Anaerophaga_OTU#329                     | 0 | 0 | 0 | 0 | 0 | 0 | 0 | 0 | 0 | 1 | 3 | 6 | 1 | 1 | 1 | 1 | 0 | 0 |
| Pseudozobellia_OTU#330                  | 0 | 0 | 0 | 0 | 0 | 0 | 0 | 0 | 0 | 0 | 0 | 0 | 0 | 1 | 0 | 0 | 0 | 0 |
| Paludibacter_OTU#331                    | 0 | 0 | 0 | 0 | 0 | 0 | 0 | 0 | 0 | 0 | 0 | 0 | 0 | 1 | 0 | 0 | 0 | 0 |
| Tannerella_OTU#332                      | 0 | 0 | 0 | 0 | 0 | 0 | 0 | 0 | 0 | 0 | 0 | 0 | 0 | 1 | 0 | 0 | 0 | 0 |
| Paludibacter_OTU#333                    | 0 | 0 | 0 | 0 | 0 | 0 | 0 | 0 | 0 | 0 | 0 | 0 | 0 | 1 | 0 | 0 | 0 | 0 |
| Paludibacter_OTU#334                    | 0 | 0 | 0 | 0 | 0 | 0 | 0 | 0 | 0 | 0 | 0 | 0 | 0 | 1 | 0 | 0 | 0 | 0 |
| Barnesiella_OTU#335                     | 0 | 0 | 0 | 0 | 0 | 1 | 1 | 0 | 0 | 1 | 0 | 0 | 1 | 1 | 1 | 0 | 0 | 0 |
| Barnesiella_OTU#336                     | 0 | 0 | 0 | 0 | 0 | 0 | 0 | 0 | 0 | 0 | 0 | 0 | 1 | 1 | 0 | 0 | 0 | 0 |
| Anaerophaga_OTU#337                     | 0 | 0 | 0 | 0 | 0 | 0 | 0 | 0 | 0 | 0 | 0 | 0 | 1 | 1 | 0 | 0 | 0 | 0 |
| Paludibacter_OTU#338                    | 0 | 0 | 0 | 0 | 0 | 1 | 0 | 0 | 0 | 0 | 0 | 0 | 0 | 1 | 0 | 0 | 0 | 0 |
| Tannerella_OTU#339                      | 0 | 0 | 0 | 0 | 0 | 0 | 0 | 1 | 0 | 0 | 1 | 0 | 1 | 2 | 0 | 0 | 0 | 0 |
| Paludibacter_OTU#340                    | 0 | 0 | 0 | 0 | 0 | 0 | 0 | 0 | 0 | 0 | 0 | 0 | 0 | 1 | 1 | 1 | 0 | 0 |
| Paludibacter_OTU#341                    | 0 | 0 | 0 | 0 | 0 | 0 | 0 | 0 | 0 | 0 | 0 | 0 | 0 | 1 | 0 | 0 | 0 | 0 |
| Limibacter_OTU#342                      | 0 | 0 | 0 | 0 | 0 | 0 | 0 | 0 | 0 | 0 | 1 | 0 | 0 | 1 | 0 | 0 | 0 | 0 |
| Limibacter_OTU#343                      | 0 | 0 | 0 | 0 | 0 | 0 | 0 | 0 | 0 | 0 | 0 | 0 | 0 | 1 | 0 | 0 | 0 | 0 |
| Paludibacter_OTU#344                    | 0 | 0 | 0 | 0 | 0 | 0 | 1 | 0 | 0 | 0 | 0 | 0 | 0 | 1 | 0 | 0 | 0 | 0 |
| Enterorhabdus_OTU#345                   | 0 | 0 | 0 | 0 | 0 | 0 | 0 | 0 | 0 | 0 | 0 | 0 | 0 | 1 | 0 | 0 | 0 | 0 |
| Paludibacter_OTU#346                    | 0 | 0 | 0 | 0 | 0 | 0 | 0 | 0 | 0 | 0 | 0 | 0 | 0 | 1 | 0 | 1 | 0 | 0 |
| Limibacter_OTU#347                      | 0 | 0 | 0 | 0 | 0 | 0 | 0 | 0 | 0 | 0 | 0 | 0 | 0 | 1 | 0 | 0 | 0 | 0 |
| Barnesiella_OTU#348                     | 0 | 0 | 0 | 0 | 0 | 0 | 0 | 0 | 0 | 0 | 0 | 0 | 0 | 1 | 0 | 0 | 0 | 0 |
| Barnesiella_OTU#349                     | 0 | 0 | 0 | 0 | 0 | 1 | 0 | 0 | 0 | 0 | 0 | 0 | 2 | 1 | 2 | 0 | 0 | 0 |
| unclassified Porphyromonadaceae_OTU#350 | 0 | 0 | 0 | 0 | 0 | 0 | 0 | 0 | 0 | 0 | 0 | 0 | 0 | 2 | 0 | 0 | 0 | 0 |

Supplementary Table 5

|                        |   |   |   |   |   |   |   |   |   |   |   |   |   |   |   |    |     |   |
|------------------------|---|---|---|---|---|---|---|---|---|---|---|---|---|---|---|----|-----|---|
| Paludibacter_OTU#351   | 0 | 0 | 0 | 0 | 0 | 0 | 0 | 0 | 0 | 0 | 0 | 0 | 0 | 1 | 0 | 0  | 0   | 0 |
| Paludibacter_OTU#352   | 0 | 0 | 0 | 0 | 0 | 0 | 0 | 0 | 0 | 0 | 0 | 0 | 0 | 1 | 0 | 0  | 0   | 0 |
| Limibacter_OTU#353     | 0 | 1 | 0 | 0 | 0 | 0 | 0 | 0 | 0 | 0 | 0 | 1 | 1 | 1 | 0 | 0  | 1   | 0 |
| Paludibacter_OTU#354   | 0 | 0 | 0 | 0 | 0 | 0 | 0 | 0 | 0 | 0 | 0 | 0 | 0 | 1 | 0 | 0  | 0   | 0 |
| Tannerella_OTU#355     | 0 | 2 | 0 | 0 | 0 | 0 | 0 | 0 | 0 | 0 | 0 | 0 | 0 | 1 | 0 | 0  | 0   | 0 |
| Roseburia_OTU#356      | 0 | 0 | 0 | 0 | 0 | 0 | 1 | 0 | 0 | 0 | 0 | 0 | 0 | 1 | 1 | 10 | 348 | 0 |
| Limibacter_OTU#357     | 0 | 0 | 0 | 0 | 0 | 0 | 0 | 0 | 0 | 0 | 0 | 0 | 1 | 1 | 0 | 0  | 0   | 0 |
| Limibacter_OTU#358     | 0 | 1 | 1 | 0 | 0 | 0 | 0 | 0 | 0 | 1 | 0 | 0 | 0 | 1 | 0 | 0  | 0   | 0 |
| Paludibacter_OTU#359   | 0 | 0 | 0 | 0 | 0 | 0 | 0 | 0 | 0 | 0 | 0 | 0 | 0 | 1 | 0 | 0  | 0   | 0 |
| Paludibacter_OTU#360   | 0 | 1 | 0 | 0 | 0 | 2 | 1 | 0 | 0 | 1 | 1 | 2 | 1 | 1 | 0 | 0  | 0   | 0 |
| Anaerophaga_OTU#361    | 0 | 0 | 0 | 0 | 0 | 0 | 0 | 0 | 0 | 0 | 0 | 0 | 0 | 1 | 0 | 0  | 0   | 0 |
| Bacteroides_OTU#362    | 0 | 0 | 0 | 0 | 0 | 0 | 0 | 0 | 0 | 0 | 0 | 0 | 0 | 1 | 0 | 0  | 1   | 0 |
| Paludibacter_OTU#363   | 0 | 0 | 0 | 0 | 0 | 0 | 0 | 0 | 0 | 0 | 0 | 0 | 0 | 1 | 0 | 0  | 0   | 0 |
| Paludibacter_OTU#364   | 0 | 0 | 0 | 0 | 0 | 0 | 0 | 0 | 0 | 0 | 0 | 0 | 0 | 1 | 0 | 0  | 0   | 0 |
| Parasutterella_OTU#365 | 0 | 0 | 0 | 0 | 0 | 0 | 0 | 0 | 0 | 0 | 0 | 0 | 0 | 1 | 0 | 0  | 0   | 0 |
| Barnesiella_OTU#366    | 0 | 0 | 0 | 0 | 0 | 1 | 0 | 0 | 0 | 0 | 0 | 0 | 0 | 1 | 0 | 0  | 0   | 0 |
| Paludibacter_OTU#367   | 0 | 2 | 0 | 0 | 0 | 1 | 0 | 2 | 0 | 0 | 0 | 2 | 0 | 1 | 1 | 0  | 0   | 0 |
| Paludibacter_OTU#368   | 0 | 0 | 0 | 0 | 0 | 0 | 0 | 0 | 0 | 0 | 0 | 0 | 0 | 1 | 0 | 0  | 0   | 0 |
| Anaerophaga_OTU#369    | 0 | 0 | 0 | 0 | 0 | 0 | 0 | 0 | 0 | 0 | 0 | 0 | 0 | 2 | 0 | 0  | 0   | 0 |
| Paludibacter_OTU#370   | 0 | 2 | 1 | 0 | 0 | 0 | 0 | 0 | 0 | 0 | 0 | 1 | 0 | 1 | 0 | 0  | 0   | 0 |
| Paludibacter_OTU#371   | 0 | 0 | 0 | 0 | 0 | 0 | 0 | 0 | 0 | 0 | 0 | 0 | 0 | 1 | 0 | 0  | 0   | 0 |
| Barnesiella_OTU#372    | 0 | 0 | 0 | 0 | 0 | 0 | 0 | 0 | 0 | 0 | 0 | 0 | 0 | 1 | 0 | 0  | 0   | 0 |
| Paludibacter_OTU#373   | 0 | 0 | 0 | 0 | 0 | 0 | 0 | 0 | 0 | 0 | 0 | 0 | 0 | 1 | 0 | 0  | 0   | 0 |
| Paludibacter_OTU#374   | 0 | 0 | 0 | 0 | 0 | 0 | 0 | 0 | 0 | 0 | 0 | 0 | 0 | 1 | 0 | 0  | 0   | 0 |
| Dorea_OTU#375          | 0 | 0 | 0 | 0 | 0 | 0 | 0 | 0 | 0 | 0 | 1 | 0 | 0 | 1 | 0 | 0  | 0   | 0 |
| Limibacter_OTU#376     | 0 | 0 | 0 | 0 | 0 | 1 | 0 | 0 | 0 | 0 | 0 | 0 | 0 | 1 | 0 | 0  | 0   | 0 |
| Barnesiella_OTU#377    | 0 | 0 | 0 | 0 | 0 | 0 | 0 | 1 | 0 | 0 | 0 | 0 | 0 | 1 | 0 | 0  | 0   | 0 |
| Paludibacter_OTU#378   | 0 | 0 | 0 | 0 | 0 | 0 | 0 | 0 | 0 | 4 | 8 | 3 | 3 | 1 | 0 | 0  | 0   | 0 |
| Paludibacter_OTU#379   | 0 | 0 | 0 | 0 | 0 | 0 | 0 | 0 | 0 | 2 | 0 | 2 | 5 | 1 | 0 | 0  | 0   | 0 |
| Paludibacter_OTU#380   | 0 | 0 | 0 | 0 | 0 | 0 | 0 | 0 | 0 | 0 | 0 | 0 | 0 | 1 | 0 | 0  | 0   | 0 |
| Paludibacter_OTU#381   | 0 | 0 | 0 | 0 | 0 | 0 | 0 | 0 | 0 | 0 | 0 | 0 | 0 | 1 | 0 | 0  | 0   | 0 |
| Paludibacter_OTU#382   | 0 | 0 | 0 | 0 | 0 | 0 | 0 | 0 | 0 | 0 | 0 | 0 | 0 | 1 | 0 | 0  | 0   | 0 |
| Allobaculum_OTU#383    | 0 | 1 | 0 | 0 | 0 | 0 | 0 | 0 | 0 | 0 | 0 | 0 | 0 | 0 | 0 | 0  | 0   | 0 |

Supplementary Table 5

|                                         |   |   |   |   |   |   |   |   |   |   |   |   |   |   |   |   |   |   |
|-----------------------------------------|---|---|---|---|---|---|---|---|---|---|---|---|---|---|---|---|---|---|
| Allobaculum_OTU#384                     | 0 | 1 | 0 | 0 | 0 | 0 | 0 | 0 | 0 | 0 | 0 | 0 | 0 | 0 | 0 | 0 | 0 | 0 |
| Ethanoligenens_OTU#385                  | 0 | 1 | 0 | 0 | 0 | 0 | 0 | 0 | 0 | 0 | 0 | 0 | 0 | 0 | 0 | 0 | 0 | 0 |
| Lachnobacterium_OTU#386                 | 0 | 1 | 2 | 3 | 0 | 0 | 0 | 0 | 0 | 0 | 0 | 0 | 0 | 0 | 0 | 0 | 0 | 0 |
| Anaerophaga_OTU#387                     | 0 | 1 | 0 | 0 | 0 | 0 | 0 | 0 | 0 | 0 | 0 | 0 | 0 | 0 | 0 | 0 | 0 | 0 |
| unclassified Bacteroidetes_OTU#388      | 0 | 1 | 0 | 1 | 0 | 0 | 0 | 0 | 0 | 0 | 0 | 0 | 0 | 0 | 0 | 0 | 0 | 0 |
| Allobaculum_OTU#389                     | 0 | 1 | 1 | 0 | 0 | 0 | 0 | 0 | 0 | 0 | 0 | 0 | 0 | 0 | 0 | 0 | 0 | 0 |
| Paludibacter_OTU#390                    | 0 | 1 | 0 | 0 | 0 | 0 | 0 | 0 | 0 | 0 | 0 | 0 | 0 | 0 | 0 | 0 | 0 | 0 |
| Allobaculum_OTU#391                     | 0 | 1 | 0 | 0 | 0 | 0 | 0 | 0 | 0 | 0 | 0 | 0 | 0 | 0 | 0 | 0 | 0 | 0 |
| Parasutterella_OTU#392                  | 0 | 1 | 0 | 0 | 0 | 0 | 0 | 0 | 0 | 0 | 0 | 0 | 0 | 0 | 0 | 0 | 0 | 0 |
| Paludibacter_OTU#393                    | 0 | 1 | 0 | 0 | 0 | 0 | 0 | 0 | 0 | 0 | 0 | 0 | 0 | 0 | 0 | 0 | 0 | 0 |
| Limibacter_OTU#394                      | 0 | 1 | 0 | 0 | 0 | 0 | 0 | 0 | 0 | 0 | 0 | 0 | 0 | 0 | 0 | 0 | 0 | 0 |
| Anaerophaga_OTU#395                     | 0 | 2 | 0 | 0 | 0 | 0 | 0 | 0 | 0 | 0 | 0 | 0 | 0 | 0 | 0 | 0 | 0 | 0 |
| Oscillibacter_OTU#396                   | 0 | 1 | 0 | 4 | 0 | 0 | 0 | 0 | 0 | 1 | 0 | 0 | 0 | 0 | 0 | 0 | 0 | 0 |
| Ruminococcus_OTU#397                    | 0 | 1 | 0 | 0 | 0 | 0 | 0 | 0 | 0 | 0 | 0 | 0 | 0 | 0 | 0 | 0 | 0 | 0 |
| Eremococcus_OTU#398                     | 0 | 1 | 0 | 0 | 0 | 0 | 0 | 0 | 0 | 0 | 0 | 0 | 0 | 0 | 0 | 0 | 0 | 0 |
| Paludibacter_OTU#399                    | 0 | 1 | 2 | 0 | 0 | 0 | 0 | 0 | 0 | 0 | 0 | 1 | 0 | 0 | 0 | 0 | 0 | 0 |
| Limibacter_OTU#400                      | 0 | 1 | 0 | 0 | 0 | 0 | 0 | 0 | 0 | 1 | 0 | 0 | 0 | 0 | 0 | 0 | 0 | 0 |
| unclassified Bacteroidales_OTU#401      | 0 | 1 | 0 | 1 | 0 | 0 | 0 | 0 | 0 | 0 | 0 | 0 | 0 | 0 | 0 | 0 | 0 | 0 |
| Rikenella_OTU#402                       | 0 | 1 | 0 | 0 | 0 | 0 | 0 | 0 | 0 | 0 | 0 | 0 | 0 | 0 | 0 | 0 | 0 | 0 |
| Paludibacter_OTU#403                    | 0 | 1 | 0 | 0 | 0 | 0 | 0 | 0 | 0 | 0 | 0 | 0 | 0 | 0 | 0 | 0 | 0 | 0 |
| Limibacter_OTU#404                      | 0 | 1 | 0 | 0 | 0 | 0 | 0 | 0 | 0 | 0 | 0 | 0 | 0 | 0 | 0 | 0 | 0 | 0 |
| Limibacter_OTU#405                      | 0 | 1 | 0 | 0 | 0 | 0 | 0 | 0 | 0 | 0 | 0 | 0 | 0 | 0 | 0 | 0 | 0 | 0 |
| Allobaculum_OTU#406                     | 0 | 1 | 0 | 0 | 0 | 0 | 0 | 0 | 0 | 0 | 0 | 0 | 0 | 0 | 0 | 0 | 0 | 0 |
| Limibacter_OTU#407                      | 0 | 1 | 0 | 0 | 0 | 0 | 0 | 0 | 0 | 0 | 0 | 0 | 0 | 0 | 0 | 0 | 0 | 0 |
| Roseburia_OTU#408                       | 0 | 1 | 0 | 0 | 0 | 0 | 0 | 0 | 0 | 0 | 2 | 0 | 0 | 0 | 0 | 0 | 0 | 0 |
| Rikenella_OTU#409                       | 0 | 1 | 0 | 0 | 0 | 0 | 1 | 2 | 1 | 0 | 0 | 0 | 0 | 0 | 0 | 0 | 0 | 0 |
| Barnesiella_OTU#410                     | 0 | 1 | 0 | 0 | 0 | 0 | 0 | 0 | 0 | 0 | 0 | 0 | 0 | 0 | 0 | 0 | 0 | 0 |
| Barnesiella_OTU#411                     | 0 | 1 | 0 | 0 | 0 | 0 | 0 | 0 | 0 | 0 | 0 | 0 | 0 | 0 | 0 | 0 | 0 | 0 |
| Barnesiella_OTU#412                     | 0 | 1 | 0 | 0 | 0 | 0 | 0 | 0 | 0 | 0 | 0 | 0 | 0 | 0 | 0 | 0 | 0 | 0 |
| Allobaculum_OTU#413                     | 0 | 1 | 0 | 0 | 0 | 0 | 0 | 0 | 0 | 0 | 0 | 0 | 0 | 0 | 0 | 0 | 0 | 0 |
| unclassified Porphyromonadaceae_OTU#414 | 0 | 1 | 0 | 0 | 0 | 1 | 0 | 1 | 0 | 0 | 0 | 0 | 0 | 0 | 0 | 1 | 0 | 0 |
| Paludibacter_OTU#415                    | 0 | 1 | 0 | 0 | 0 | 0 | 0 | 0 | 0 | 0 | 0 | 0 | 0 | 0 | 0 | 0 | 0 | 0 |
| Limibacter_OTU#416                      | 0 | 3 | 0 | 1 | 0 | 0 | 0 | 0 | 0 | 0 | 0 | 0 | 0 | 0 | 0 | 0 | 0 | 0 |

Supplementary Table 5

|                                         |   |   |   |    |   |   |   |   |   |   |   |   |   |   |   |   |   |   |
|-----------------------------------------|---|---|---|----|---|---|---|---|---|---|---|---|---|---|---|---|---|---|
| Anaerophaga_OTU#417                     | 0 | 1 | 0 | 0  | 0 | 0 | 0 | 0 | 0 | 0 | 0 | 0 | 0 | 0 | 0 | 0 | 0 | 0 |
| unclassified Porphyromonadaceae_OTU#418 | 0 | 1 | 0 | 0  | 0 | 0 | 0 | 1 | 0 | 0 | 0 | 0 | 0 | 0 | 0 | 0 | 0 | 0 |
| unclassified Porphyromonadaceae_OTU#419 | 0 | 3 | 4 | 2  | 0 | 0 | 0 | 0 | 0 | 1 | 0 | 3 | 0 | 0 | 0 | 0 | 0 | 0 |
| Paludibacter_OTU#420                    | 0 | 1 | 0 | 0  | 0 | 0 | 0 | 0 | 0 | 0 | 0 | 0 | 0 | 0 | 0 | 0 | 0 | 0 |
| Robinsoniella_OTU#421                   | 0 | 4 | 4 | 11 | 0 | 0 | 0 | 0 | 0 | 0 | 0 | 0 | 0 | 0 | 0 | 0 | 0 | 0 |
| Allobaculum_OTU#422                     | 0 | 1 | 0 | 0  | 0 | 0 | 0 | 0 | 0 | 0 | 0 | 0 | 0 | 0 | 0 | 0 | 0 | 0 |
| Paludibacter_OTU#423                    | 0 | 1 | 0 | 0  | 0 | 0 | 0 | 0 | 0 | 0 | 0 | 0 | 0 | 0 | 0 | 1 | 0 | 0 |
| Lachnobacterium_OTU#424                 | 0 | 2 | 2 | 9  | 0 | 0 | 0 | 0 | 0 | 0 | 0 | 0 | 0 | 0 | 0 | 0 | 1 | 0 |
| Paludibacter_OTU#425                    | 0 | 1 | 0 | 0  | 0 | 0 | 0 | 0 | 0 | 0 | 0 | 0 | 0 | 0 | 0 | 0 | 0 | 0 |
| Lactobacillus_OTU#426                   | 0 | 1 | 0 | 0  | 0 | 0 | 0 | 0 | 0 | 0 | 0 | 0 | 0 | 0 | 0 | 0 | 0 | 0 |
| Anaerophaga_OTU#427                     | 0 | 1 | 0 | 0  | 0 | 0 | 0 | 0 | 0 | 0 | 0 | 0 | 0 | 0 | 0 | 0 | 0 | 0 |
| Paludibacter_OTU#428                    | 0 | 1 | 0 | 0  | 0 | 0 | 0 | 0 | 0 | 0 | 0 | 0 | 0 | 0 | 0 | 0 | 0 | 0 |
| Rikenella_OTU#429                       | 0 | 1 | 0 | 0  | 0 | 1 | 4 | 1 | 0 | 0 | 0 | 0 | 0 | 0 | 0 | 0 | 0 | 0 |
| unclassified Bacteroidales_OTU#430      | 0 | 1 | 0 | 0  | 0 | 0 | 0 | 0 | 1 | 0 | 0 | 0 | 0 | 0 | 0 | 0 | 0 | 0 |
| Anaerophaga_OTU#431                     | 0 | 1 | 0 | 0  | 0 | 0 | 0 | 0 | 0 | 0 | 0 | 0 | 0 | 0 | 0 | 0 | 0 | 0 |
| Paludibacter_OTU#432                    | 0 | 1 | 0 | 0  | 0 | 0 | 0 | 0 | 0 | 0 | 0 | 0 | 0 | 0 | 0 | 0 | 0 | 0 |
| Paludibacter_OTU#433                    | 0 | 1 | 0 | 0  | 0 | 0 | 3 | 1 | 0 | 0 | 0 | 0 | 0 | 0 | 0 | 0 | 0 | 0 |
| Heliobacillus_OTU#434                   | 0 | 1 | 0 | 2  | 0 | 0 | 0 | 0 | 0 | 0 | 0 | 0 | 0 | 0 | 0 | 0 | 0 | 0 |
| Tannerella_OTU#435                      | 0 | 1 | 0 | 0  | 0 | 0 | 0 | 0 | 0 | 0 | 0 | 0 | 0 | 0 | 0 | 0 | 0 | 0 |
| Barnesiella_OTU#436                     | 0 | 1 | 0 | 0  | 0 | 0 | 0 | 0 | 0 | 0 | 0 | 0 | 0 | 0 | 0 | 0 | 0 | 0 |
| Lachnobacterium_OTU#437                 | 0 | 1 | 0 | 1  | 0 | 0 | 0 | 0 | 0 | 0 | 0 | 0 | 0 | 0 | 0 | 0 | 0 | 0 |
| unclassified Clostridiales_OTU#438      | 0 | 1 | 1 | 2  | 0 | 0 | 0 | 0 | 0 | 0 | 0 | 0 | 0 | 0 | 0 | 0 | 0 | 0 |
| Paludibacter_OTU#439                    | 0 | 1 | 0 | 0  | 0 | 0 | 0 | 0 | 0 | 0 | 0 | 0 | 0 | 0 | 0 | 0 | 0 | 0 |
| Allobaculum_OTU#440                     | 0 | 1 | 0 | 0  | 0 | 0 | 0 | 0 | 0 | 0 | 0 | 0 | 0 | 0 | 0 | 0 | 0 | 0 |
| Paludibacter_OTU#441                    | 0 | 1 | 0 | 0  | 0 | 0 | 0 | 0 | 0 | 0 | 0 | 0 | 0 | 0 | 0 | 0 | 0 | 0 |
| Paludibacter_OTU#442                    | 0 | 1 | 0 | 0  | 0 | 0 | 0 | 0 | 0 | 0 | 0 | 0 | 0 | 0 | 0 | 0 | 0 | 0 |
| Anaerobacter_OTU#443                    | 0 | 3 | 3 | 12 | 0 | 0 | 0 | 0 | 1 | 1 | 4 | 0 | 0 | 0 | 0 | 0 | 0 | 0 |
| Parasutterella_OTU#444                  | 0 | 1 | 0 | 0  | 0 | 0 | 0 | 0 | 0 | 0 | 0 | 0 | 0 | 0 | 0 | 0 | 0 | 0 |
| Limibacter_OTU#445                      | 0 | 1 | 0 | 0  | 0 | 0 | 0 | 0 | 0 | 0 | 0 | 0 | 0 | 0 | 0 | 0 | 0 | 0 |
| Tannerella_OTU#446                      | 0 | 1 | 0 | 0  | 0 | 0 | 0 | 0 | 0 | 0 | 0 | 0 | 0 | 0 | 0 | 0 | 0 | 0 |
| Paludibacter_OTU#447                    | 0 | 1 | 0 | 0  | 0 | 0 | 0 | 0 | 0 | 0 | 0 | 0 | 0 | 0 | 0 | 0 | 0 | 0 |
| Aquiflexum_OTU#448                      | 0 | 1 | 0 | 0  | 0 | 0 | 0 | 0 | 0 | 0 | 0 | 0 | 0 | 0 | 0 | 0 | 0 | 0 |
| Allobaculum_OTU#449                     | 0 | 3 | 0 | 0  | 0 | 0 | 0 | 0 | 0 | 0 | 0 | 0 | 0 | 0 | 0 | 0 | 0 | 0 |

Supplementary Table 5

|                                    |   |   |    |    |   |   |   |   |   |    |    |    |    |   |   |   |   |   |
|------------------------------------|---|---|----|----|---|---|---|---|---|----|----|----|----|---|---|---|---|---|
| Paludibacter_OTU#450               | 0 | 2 | 0  | 0  | 0 | 0 | 0 | 0 | 0 | 0  | 0  | 0  | 0  | 0 | 0 | 0 | 0 | 0 |
| Barnesiella_OTU#451                | 0 | 1 | 0  | 0  | 0 | 0 | 0 | 0 | 0 | 0  | 0  | 0  | 0  | 0 | 0 | 2 | 0 | 0 |
| Paludibacter_OTU#452               | 0 | 1 | 0  | 0  | 0 | 0 | 0 | 0 | 0 | 0  | 0  | 0  | 0  | 0 | 0 | 0 | 0 | 0 |
| unclassified Bacteroidales_OTU#453 | 0 | 1 | 1  | 0  | 0 | 0 | 0 | 0 | 0 | 0  | 0  | 0  | 0  | 0 | 0 | 0 | 0 | 0 |
| Barnesiella_OTU#454                | 0 | 1 | 0  | 0  | 0 | 0 | 0 | 0 | 0 | 0  | 0  | 0  | 0  | 0 | 0 | 0 | 0 | 0 |
| Paludibacter_OTU#455               | 0 | 1 | 0  | 0  | 0 | 0 | 0 | 0 | 0 | 0  | 0  | 0  | 0  | 0 | 0 | 0 | 0 | 0 |
| Anaerophaga_OTU#456                | 0 | 1 | 0  | 0  | 0 | 0 | 0 | 0 | 0 | 0  | 0  | 0  | 0  | 0 | 0 | 0 | 0 | 0 |
| Paludibacter_OTU#457               | 0 | 1 | 0  | 0  | 0 | 0 | 0 | 0 | 0 | 0  | 0  | 0  | 0  | 0 | 0 | 0 | 0 | 0 |
| Limibacter_OTU#458                 | 0 | 1 | 10 | 1  | 0 | 0 | 1 | 0 | 0 | 3  | 0  | 6  | 5  | 0 | 0 | 0 | 0 | 0 |
| Limibacter_OTU#459                 | 0 | 1 | 0  | 1  | 0 | 0 | 0 | 0 | 0 | 0  | 0  | 0  | 0  | 0 | 0 | 0 | 0 | 0 |
| Barnesiella_OTU#460                | 0 | 1 | 0  | 0  | 0 | 0 | 0 | 0 | 0 | 0  | 0  | 1  | 0  | 0 | 0 | 0 | 0 | 0 |
| Paludibacter_OTU#461               | 0 | 1 | 0  | 1  | 0 | 1 | 0 | 2 | 0 | 0  | 1  | 0  | 3  | 0 | 0 | 0 | 0 | 0 |
| Oscillibacter_OTU#462              | 0 | 1 | 0  | 0  | 0 | 0 | 0 | 0 | 0 | 0  | 0  | 0  | 0  | 0 | 0 | 0 | 0 | 0 |
| unclassified Bacteria_OTU#463      | 0 | 1 | 0  | 1  | 0 | 0 | 0 | 0 | 0 | 0  | 0  | 0  | 0  | 0 | 0 | 0 | 0 | 0 |
| Anaerophaga_OTU#464                | 0 | 1 | 0  | 0  | 0 | 0 | 0 | 0 | 0 | 0  | 0  | 0  | 0  | 0 | 0 | 0 | 0 | 0 |
| unclassified Bacteroidetes_OTU#465 | 0 | 1 | 0  | 0  | 0 | 1 | 0 | 2 | 0 | 0  | 0  | 0  | 0  | 0 | 0 | 0 | 0 | 0 |
| Limibacter_OTU#466                 | 0 | 1 | 0  | 0  | 0 | 0 | 0 | 0 | 0 | 0  | 0  | 0  | 0  | 0 | 0 | 0 | 0 | 0 |
| Robinsoniella_OTU#467              | 0 | 1 | 0  | 1  | 0 | 0 | 0 | 0 | 0 | 0  | 0  | 0  | 0  | 0 | 0 | 0 | 0 | 0 |
| Paludibacter_OTU#468               | 0 | 1 | 0  | 0  | 0 | 0 | 0 | 0 | 0 | 0  | 0  | 0  | 0  | 0 | 0 | 0 | 0 | 0 |
| Paludibacter_OTU#469               | 0 | 1 | 0  | 0  | 0 | 0 | 0 | 0 | 0 | 0  | 0  | 0  | 0  | 0 | 0 | 0 | 0 | 0 |
| Atopobacter_OTU#470                | 0 | 1 | 0  | 0  | 0 | 0 | 0 | 0 | 0 | 0  | 0  | 0  | 0  | 0 | 0 | 0 | 0 | 0 |
| Marvinbryantia_OTU#471             | 0 | 1 | 5  | 11 | 0 | 0 | 0 | 0 | 0 | 56 | 63 | 11 | 10 | 0 | 0 | 0 | 0 | 0 |
| Tannerella_OTU#472                 | 0 | 1 | 0  | 0  | 0 | 0 | 0 | 0 | 0 | 0  | 0  | 0  | 0  | 0 | 0 | 0 | 0 | 0 |
| Paludibacter_OTU#473               | 0 | 1 | 0  | 0  | 0 | 0 | 0 | 0 | 0 | 0  | 0  | 0  | 0  | 0 | 0 | 0 | 0 | 0 |
| Paludibacter_OTU#474               | 0 | 1 | 1  | 0  | 0 | 0 | 0 | 0 | 0 | 0  | 0  | 0  | 0  | 0 | 0 | 0 | 0 | 0 |
| Allobaculum_OTU#475                | 0 | 1 | 0  | 0  | 0 | 0 | 0 | 0 | 0 | 0  | 0  | 0  | 0  | 0 | 0 | 0 | 0 | 0 |
| Allobaculum_OTU#476                | 0 | 1 | 0  | 0  | 0 | 0 | 0 | 0 | 0 | 0  | 0  | 0  | 0  | 0 | 0 | 0 | 0 | 0 |
| Pseudozobellia_OTU#477             | 0 | 1 | 0  | 0  | 0 | 0 | 0 | 0 | 0 | 0  | 0  | 0  | 0  | 0 | 0 | 0 | 0 | 0 |
| Rikenella_OTU#478                  | 0 | 1 | 0  | 0  | 0 | 0 | 0 | 0 | 0 | 0  | 0  | 0  | 0  | 0 | 0 | 0 | 0 | 0 |
| Barnesiella_OTU#479                | 0 | 1 | 0  | 0  | 0 | 1 | 0 | 0 | 0 | 0  | 0  | 0  | 1  | 0 | 0 | 0 | 0 | 0 |
| Allobaculum_OTU#480                | 0 | 2 | 0  | 0  | 0 | 0 | 0 | 0 | 0 | 0  | 0  | 0  | 0  | 0 | 0 | 0 | 0 | 0 |
| Oscillibacter_OTU#481              | 0 | 1 | 0  | 5  | 0 | 0 | 0 | 0 | 0 | 0  | 0  | 0  | 0  | 0 | 0 | 0 | 0 | 0 |
| Limibacter_OTU#482                 | 0 | 1 | 0  | 0  | 0 | 1 | 0 | 0 | 0 | 0  | 0  | 0  | 0  | 0 | 0 | 0 | 0 | 0 |

Supplementary Table 5



|                                         |   |   |   |   |   |   |   |   |   |   |   |   |   |   |   |   |    |   |
|-----------------------------------------|---|---|---|---|---|---|---|---|---|---|---|---|---|---|---|---|----|---|
| Limibacter_OTU#483                      | 0 | 1 | 0 | 0 | 0 | 0 | 0 | 0 | 0 | 0 | 0 | 0 | 0 | 0 | 0 | 0 | 0  | 0 |
| Tannerella_OTU#484                      | 0 | 1 | 0 | 0 | 0 | 0 | 0 | 0 | 0 | 0 | 0 | 0 | 0 | 0 | 0 | 0 | 0  | 0 |
| Paludibacter_OTU#485                    | 0 | 1 | 0 | 0 | 0 | 0 | 0 | 0 | 0 | 0 | 1 | 1 | 1 | 0 | 0 | 0 | 0  | 0 |
| Kordia_OTU#486                          | 0 | 1 | 0 | 0 | 0 | 0 | 0 | 0 | 0 | 0 | 0 | 0 | 0 | 0 | 0 | 0 | 0  | 0 |
| Pseudozobellia_OTU#487                  | 0 | 1 | 0 | 0 | 0 | 0 | 0 | 0 | 0 | 0 | 0 | 0 | 0 | 0 | 0 | 0 | 0  | 0 |
| Limibacter_OTU#488                      | 0 | 1 | 0 | 0 | 0 | 0 | 0 | 0 | 0 | 0 | 0 | 0 | 0 | 0 | 0 | 0 | 0  | 0 |
| Parasutterella_OTU#489                  | 0 | 1 | 0 | 0 | 0 | 0 | 0 | 0 | 0 | 0 | 0 | 0 | 0 | 0 | 0 | 0 | 0  | 0 |
| Hallella_OTU#490                        | 0 | 1 | 0 | 0 | 0 | 0 | 0 | 0 | 0 | 0 | 0 | 0 | 0 | 0 | 0 | 0 | 0  | 0 |
| Parasporobacterium_OTU#491              | 0 | 1 | 1 | 7 | 0 | 0 | 0 | 0 | 0 | 0 | 0 | 0 | 0 | 0 | 0 | 0 | 0  | 0 |
| Paludibacter_OTU#492                    | 0 | 1 | 2 | 0 | 0 | 0 | 0 | 0 | 0 | 0 | 0 | 1 | 0 | 0 | 0 | 0 | 0  | 0 |
| Parasutterella_OTU#493                  | 0 | 1 | 0 | 0 | 0 | 0 | 0 | 0 | 0 | 0 | 0 | 0 | 0 | 0 | 0 | 0 | 0  | 0 |
| Anaerotruncus_OTU#494                   | 0 | 1 | 0 | 1 | 0 | 0 | 0 | 0 | 2 | 0 | 0 | 0 | 0 | 0 | 0 | 0 | 1  | 0 |
| unclassified Porphyromonadaceae_OTU#495 | 0 | 1 | 0 | 2 | 0 | 0 | 0 | 0 | 0 | 0 | 0 | 0 | 0 | 0 | 0 | 0 | 0  | 0 |
| Paludibacter_OTU#496                    | 0 | 1 | 0 | 0 | 0 | 0 | 0 | 0 | 0 | 0 | 0 | 0 | 0 | 0 | 0 | 0 | 0  | 0 |
| Paludibacter_OTU#497                    | 0 | 1 | 0 | 0 | 0 | 0 | 0 | 0 | 0 | 0 | 0 | 0 | 0 | 0 | 0 | 0 | 0  | 0 |
| Paludibacter_OTU#498                    | 0 | 1 | 0 | 0 | 0 | 0 | 0 | 0 | 0 | 0 | 0 | 0 | 0 | 0 | 0 | 0 | 0  | 0 |
| Barnesiella_OTU#499                     | 0 | 2 | 1 | 1 | 0 | 0 | 0 | 0 | 0 | 0 | 0 | 0 | 0 | 0 | 0 | 0 | 0  | 0 |
| Paludibacter_OTU#500                    | 0 | 1 | 1 | 0 | 0 | 0 | 0 | 0 | 0 | 0 | 0 | 0 | 0 | 0 | 0 | 0 | 0  | 0 |
| Tannerella_OTU#501                      | 0 | 1 | 0 | 0 | 0 | 0 | 0 | 0 | 0 | 0 | 0 | 0 | 0 | 0 | 0 | 0 | 0  | 0 |
| unclassified Bacteroidales_OTU#502      | 0 | 1 | 0 | 1 | 0 | 0 | 0 | 0 | 0 | 0 | 0 | 0 | 0 | 0 | 0 | 0 | 0  | 0 |
| Howardella_OTU#503                      | 0 | 1 | 2 | 1 | 0 | 0 | 0 | 0 | 0 | 0 | 0 | 0 | 0 | 0 | 0 | 0 | 0  | 0 |
| Allobaculum_OTU#504                     | 0 | 1 | 0 | 0 | 0 | 0 | 0 | 0 | 0 | 0 | 0 | 0 | 0 | 0 | 0 | 0 | 0  | 0 |
| Pseudozobellia_OTU#505                  | 0 | 1 | 0 | 0 | 0 | 0 | 0 | 0 | 0 | 0 | 0 | 0 | 0 | 0 | 0 | 0 | 0  | 0 |
| Paludibacter_OTU#506                    | 0 | 1 | 0 | 0 | 0 | 0 | 0 | 0 | 0 | 0 | 0 | 0 | 0 | 0 | 0 | 0 | 0  | 0 |
| Paludibacter_OTU#507                    | 0 | 1 | 0 | 0 | 0 | 0 | 0 | 0 | 0 | 0 | 0 | 0 | 0 | 0 | 0 | 0 | 0  | 0 |
| Allobaculum_OTU#508                     | 0 | 1 | 0 | 0 | 0 | 0 | 0 | 0 | 0 | 0 | 0 | 0 | 0 | 0 | 0 | 0 | 0  | 0 |
| Limibacter_OTU#509                      | 0 | 1 | 0 | 0 | 0 | 0 | 0 | 0 | 0 | 0 | 0 | 0 | 0 | 0 | 0 | 0 | 0  | 0 |
| Marvinbryantia_OTU#510                  | 0 | 1 | 0 | 0 | 0 | 0 | 0 | 0 | 0 | 0 | 0 | 0 | 0 | 0 | 0 | 0 | 0  | 0 |
| Paludibacter_OTU#511                    | 0 | 1 | 0 | 0 | 0 | 0 | 0 | 0 | 0 | 0 | 0 | 0 | 0 | 0 | 0 | 0 | 0  | 0 |
| Paludibacter_OTU#512                    | 0 | 1 | 5 | 1 | 0 | 0 | 0 | 0 | 0 | 0 | 0 | 0 | 0 | 0 | 0 | 0 | 0  | 0 |
| Paludibacter_OTU#513                    | 0 | 1 | 1 | 0 | 0 | 0 | 1 | 0 | 0 | 0 | 0 | 0 | 0 | 0 | 0 | 0 | 0  | 0 |
| Paludibacter_OTU#514                    | 0 | 1 | 0 | 0 | 0 | 0 | 0 | 0 | 0 | 0 | 0 | 0 | 0 | 0 | 0 | 0 | 0  | 0 |
| Ralstonia_OTU#515                       | 0 | 1 | 0 | 2 | 0 | 0 | 0 | 0 | 0 | 3 | 6 | 1 | 3 | 0 | 0 | 2 | 34 | 0 |

Supplementary Table 5

|                                    |   |   |   |   |   |   |   |   |   |     |    |     |    |   |   |   |   |   |
|------------------------------------|---|---|---|---|---|---|---|---|---|-----|----|-----|----|---|---|---|---|---|
| Paludibacter_OTU#516               | 0 | 1 | 0 | 0 | 0 | 0 | 0 | 0 | 0 | 0   | 0  | 0   | 0  | 0 | 0 | 0 | 0 | 0 |
| Paludibacter_OTU#517               | 0 | 1 | 0 | 0 | 0 | 0 | 0 | 0 | 0 | 0   | 0  | 0   | 0  | 0 | 0 | 0 | 0 | 0 |
| Acetitomaculum_OTU#518             | 0 | 1 | 0 | 1 | 0 | 0 | 0 | 0 | 0 | 0   | 4  | 0   | 1  | 0 | 0 | 0 | 0 | 0 |
| Allobaculum_OTU#519                | 0 | 1 | 0 | 0 | 0 | 0 | 0 | 0 | 0 | 0   | 0  | 0   | 0  | 0 | 0 | 0 | 0 | 0 |
| unclassified Bacteroidetes_OTU#520 | 0 | 1 | 1 | 0 | 0 | 0 | 0 | 0 | 0 | 0   | 0  | 0   | 0  | 0 | 0 | 0 | 0 | 0 |
| Barnesiella_OTU#521                | 0 | 1 | 0 | 0 | 0 | 0 | 0 | 0 | 0 | 0   | 0  | 0   | 0  | 0 | 0 | 0 | 0 | 0 |
| Butyricoccus_OTU#522               | 0 | 1 | 0 | 6 | 0 | 0 | 0 | 0 | 0 | 0   | 15 | 1   | 4  | 0 | 0 | 0 | 0 | 0 |
| Robinsoniella_OTU#523              | 0 | 0 | 0 | 0 | 0 | 0 | 0 | 0 | 0 | 244 | 35 | 192 | 44 | 0 | 0 | 0 | 0 | 0 |
| Coprococcus_OTU#524                | 0 | 0 | 0 | 1 | 0 | 0 | 0 | 0 | 0 | 32  | 15 | 5   | 3  | 0 | 0 | 0 | 0 | 0 |
| unclassified TM7_OTU#525           | 0 | 0 | 0 | 0 | 0 | 0 | 0 | 0 | 0 | 2   | 0  | 0   | 0  | 0 | 0 | 0 | 0 | 0 |
| Marvinbryantia_OTU#526             | 0 | 0 | 0 | 0 | 0 | 0 | 0 | 0 | 0 | 8   | 4  | 5   | 0  | 0 | 0 | 0 | 0 | 0 |
| Lachnobacterium_OTU#527            | 0 | 0 | 0 | 0 | 0 | 0 | 0 | 0 | 0 | 1   | 0  | 0   | 0  | 0 | 0 | 0 | 0 | 0 |
| Robinsoniella_OTU#528              | 0 | 0 | 0 | 0 | 0 | 0 | 0 | 0 | 0 | 5   | 0  | 6   | 0  | 0 | 0 | 0 | 0 | 0 |
| Roseburia_OTU#529                  | 0 | 0 | 0 | 0 | 0 | 0 | 0 | 0 | 0 | 3   | 0  | 0   | 0  | 0 | 0 | 0 | 0 | 0 |
| Marvinbryantia_OTU#530             | 0 | 0 | 0 | 0 | 0 | 0 | 0 | 0 | 0 | 1   | 0  | 0   | 0  | 0 | 0 | 0 | 0 | 0 |
| Marvinbryantia_OTU#531             | 0 | 0 | 0 | 0 | 0 | 0 | 0 | 0 | 0 | 1   | 0  | 0   | 0  | 0 | 0 | 0 | 0 | 0 |
| Barnesiella_OTU#532                | 0 | 0 | 0 | 0 | 0 | 0 | 0 | 0 | 0 | 1   | 0  | 0   | 1  | 0 | 0 | 0 | 0 | 0 |
| Marvinbryantia_OTU#533             | 0 | 0 | 0 | 5 | 0 | 0 | 0 | 0 | 0 | 2   | 20 | 0   | 2  | 0 | 0 | 0 | 0 | 0 |
| Robinsoniella_OTU#534              | 0 | 0 | 0 | 0 | 0 | 0 | 0 | 0 | 0 | 3   | 1  | 4   | 2  | 0 | 0 | 0 | 0 | 0 |
| Oscillibacter_OTU#535              | 0 | 0 | 0 | 0 | 0 | 0 | 0 | 0 | 0 | 10  | 1  | 1   | 0  | 0 | 0 | 0 | 0 | 0 |
| Oscillibacter_OTU#536              | 0 | 0 | 0 | 2 | 0 | 0 | 0 | 0 | 0 | 6   | 1  | 1   | 0  | 0 | 0 | 0 | 0 | 0 |
| Butyricoccus_OTU#537               | 0 | 0 | 0 | 0 | 0 | 0 | 0 | 0 | 0 | 4   | 2  | 2   | 0  | 0 | 0 | 0 | 0 | 0 |
| Lactonifactor_OTU#538              | 0 | 0 | 0 | 0 | 0 | 0 | 0 | 0 | 0 | 2   | 0  | 1   | 0  | 0 | 0 | 0 | 0 | 0 |
| Anaerophaga_OTU#539                | 0 | 0 | 0 | 0 | 0 | 0 | 0 | 0 | 0 | 1   | 0  | 0   | 0  | 0 | 0 | 0 | 0 | 0 |
| Lachnobacterium_OTU#540            | 0 | 0 | 0 | 0 | 0 | 0 | 0 | 0 | 0 | 1   | 0  | 0   | 0  | 0 | 0 | 0 | 0 | 0 |
| Heliobacillus_OTU#541              | 0 | 0 | 0 | 1 | 0 | 0 | 0 | 0 | 0 | 3   | 2  | 1   | 0  | 0 | 0 | 0 | 0 | 0 |
| Robinsoniella_OTU#542              | 0 | 0 | 0 | 0 | 0 | 0 | 0 | 0 | 0 | 1   | 0  | 0   | 0  | 0 | 0 | 0 | 0 | 0 |
| Parasporobacterium_OTU#543         | 0 | 0 | 0 | 0 | 0 | 0 | 0 | 0 | 0 | 1   | 0  | 0   | 0  | 0 | 0 | 0 | 0 | 0 |
| Butyricoccus_OTU#544               | 0 | 0 | 0 | 0 | 0 | 0 | 0 | 0 | 0 | 2   | 2  | 1   | 0  | 0 | 0 | 0 | 0 | 0 |
| Mucispirillum_OTU#545              | 0 | 0 | 0 | 0 | 0 | 0 | 0 | 0 | 0 | 8   | 7  | 1   | 4  | 0 | 0 | 0 | 0 | 0 |
| Robinsoniella_OTU#546              | 0 | 0 | 0 | 0 | 0 | 0 | 0 | 0 | 0 | 3   | 0  | 2   | 1  | 0 | 0 | 0 | 0 | 0 |
| Paludibacter_OTU#547               | 0 | 0 | 0 | 0 | 0 | 0 | 0 | 0 | 0 | 1   | 0  | 0   | 0  | 0 | 0 | 0 | 0 | 0 |
| Anaerophaga_OTU#548                | 0 | 0 | 0 | 0 | 0 | 0 | 0 | 0 | 0 | 1   | 0  | 0   | 0  | 0 | 0 | 0 | 0 | 0 |

Supplementary Table 5

|                                  |   |   |   |   |   |   |   |   |   |   |    |   |   |   |   |   |   |
|----------------------------------|---|---|---|---|---|---|---|---|---|---|----|---|---|---|---|---|---|
| Paludibacter_OTU#549             | 0 | 0 | 0 | 0 | 0 | 0 | 0 | 0 | 0 | 1 | 0  | 0 | 0 | 0 | 0 | 0 | 0 |
| Robinsoniella_OTU#550            | 0 | 0 | 0 | 0 | 0 | 0 | 0 | 0 | 0 | 1 | 1  | 1 | 0 | 0 | 0 | 0 | 0 |
| Paludibacter_OTU#551             | 0 | 0 | 0 | 0 | 0 | 0 | 0 | 0 | 0 | 1 | 0  | 0 | 0 | 0 | 0 | 0 | 0 |
| Limibacter_OTU#552               | 0 | 0 | 0 | 0 | 0 | 0 | 0 | 0 | 0 | 1 | 0  | 0 | 0 | 0 | 0 | 0 | 0 |
| Roseburia_OTU#553                | 0 | 0 | 0 | 0 | 0 | 0 | 0 | 0 | 0 | 8 | 1  | 1 | 0 | 0 | 0 | 0 | 0 |
| Robinsoniella_OTU#554            | 0 | 0 | 0 | 0 | 0 | 0 | 0 | 0 | 0 | 1 | 0  | 0 | 0 | 0 | 0 | 0 | 0 |
| Robinsoniella_OTU#555            | 0 | 0 | 0 | 0 | 0 | 0 | 0 | 0 | 0 | 1 | 0  | 1 | 0 | 0 | 0 | 0 | 0 |
| Parabacteroides_OTU#556          | 0 | 0 | 0 | 0 | 0 | 0 | 0 | 0 | 0 | 3 | 4  | 1 | 0 | 0 | 0 | 3 | 1 |
| Syntrophococcus_OTU#557          | 0 | 0 | 0 | 0 | 0 | 0 | 0 | 0 | 0 | 1 | 0  | 0 | 0 | 0 | 0 | 0 | 0 |
| Robinsoniella_OTU#558            | 0 | 0 | 0 | 0 | 0 | 0 | 0 | 0 | 0 | 3 | 0  | 1 | 1 | 0 | 0 | 0 | 0 |
| Mucispirillum_OTU#559            | 0 | 0 | 0 | 0 | 0 | 0 | 0 | 0 | 0 | 1 | 0  | 0 | 0 | 0 | 0 | 0 | 0 |
| Coprococcus_OTU#560              | 0 | 0 | 0 | 0 | 0 | 0 | 0 | 0 | 0 | 2 | 0  | 0 | 1 | 0 | 0 | 0 | 0 |
| Marvinbryantia_OTU#561           | 0 | 0 | 0 | 0 | 0 | 0 | 0 | 0 | 0 | 1 | 0  | 0 | 0 | 0 | 0 | 0 | 0 |
| Zhangella_OTU#562                | 0 | 0 | 0 | 2 | 0 | 0 | 0 | 0 | 0 | 3 | 3  | 0 | 2 | 0 | 0 | 0 | 0 |
| Tannerella_OTU#563               | 0 | 0 | 0 | 0 | 0 | 0 | 0 | 0 | 0 | 1 | 0  | 0 | 0 | 0 | 0 | 0 | 0 |
| Eubacterium_OTU#564              | 0 | 0 | 0 | 0 | 0 | 0 | 1 | 0 | 1 | 1 | 0  | 0 | 0 | 0 | 0 | 0 | 0 |
| Parasporobacterium_OTU#565       | 0 | 0 | 0 | 0 | 0 | 0 | 0 | 0 | 0 | 1 | 0  | 1 | 0 | 0 | 0 | 0 | 0 |
| Coprococcus_OTU#566              | 0 | 0 | 0 | 0 | 0 | 0 | 0 | 0 | 0 | 3 | 0  | 1 | 0 | 0 | 0 | 0 | 0 |
| Robinsoniella_OTU#567            | 0 | 0 | 0 | 0 | 0 | 0 | 0 | 0 | 0 | 1 | 0  | 0 | 0 | 0 | 0 | 0 | 0 |
| Dorea_OTU#568                    | 0 | 0 | 0 | 0 | 0 | 0 | 0 | 0 | 0 | 1 | 0  | 0 | 0 | 0 | 0 | 0 | 0 |
| Lachnobacterium_OTU#569          | 0 | 0 | 0 | 0 | 0 | 0 | 0 | 0 | 0 | 1 | 0  | 0 | 0 | 0 | 0 | 0 | 0 |
| Papillibacter_OTU#570            | 0 | 0 | 0 | 0 | 0 | 0 | 0 | 0 | 0 | 1 | 0  | 0 | 0 | 0 | 0 | 0 | 0 |
| Acetitomaculum_OTU#571           | 0 | 0 | 0 | 0 | 0 | 0 | 0 | 0 | 0 | 2 | 2  | 0 | 0 | 0 | 0 | 0 | 0 |
| Pseudozobellia_OTU#572           | 0 | 0 | 0 | 0 | 0 | 0 | 0 | 0 | 0 | 1 | 0  | 0 | 0 | 0 | 0 | 0 | 0 |
| Hydrogenoanaerobacterium_OTU#573 | 0 | 0 | 0 | 0 | 0 | 0 | 0 | 0 | 0 | 2 | 0  | 0 | 0 | 0 | 0 | 0 | 0 |
| Dorea_OTU#574                    | 0 | 0 | 0 | 0 | 0 | 0 | 0 | 0 | 0 | 1 | 0  | 0 | 0 | 0 | 0 | 0 | 0 |
| Lachnobacterium_OTU#575          | 0 | 0 | 0 | 0 | 0 | 0 | 0 | 0 | 0 | 1 | 0  | 0 | 0 | 0 | 0 | 0 | 0 |
| Robinsoniella_OTU#576            | 0 | 0 | 0 | 0 | 0 | 0 | 0 | 0 | 0 | 1 | 0  | 0 | 0 | 0 | 0 | 0 | 0 |
| Robinsoniella_OTU#577            | 0 | 0 | 0 | 0 | 0 | 0 | 0 | 0 | 0 | 1 | 0  | 0 | 0 | 0 | 0 | 0 | 0 |
| Paludibacter_OTU#578             | 0 | 0 | 0 | 0 | 0 | 0 | 0 | 0 | 0 | 1 | 0  | 0 | 0 | 0 | 0 | 0 | 0 |
| Paludibacter_OTU#579             | 0 | 0 | 2 | 0 | 0 | 0 | 0 | 0 | 0 | 1 | 0  | 2 | 4 | 0 | 0 | 0 | 0 |
| Ruminococcus_OTU#580             | 0 | 0 | 0 | 2 | 0 | 0 | 0 | 0 | 0 | 3 | 11 | 3 | 2 | 0 | 0 | 0 | 0 |
| Roseburia_OTU#581                | 0 | 0 | 0 | 0 | 0 | 0 | 0 | 0 | 0 | 1 | 2  | 1 | 0 | 0 | 0 | 0 | 0 |

Supplementary Table 5

|                                    |   |   |   |   |   |   |   |   |    |   |   |   |   |   |   |   |   |   |
|------------------------------------|---|---|---|---|---|---|---|---|----|---|---|---|---|---|---|---|---|---|
| Papillibacter_OTU#582              | 0 | 0 | 0 | 0 | 0 | 0 | 0 | 0 | 0  | 1 | 0 | 0 | 0 | 0 | 0 | 0 | 0 | 0 |
| Anaerophaga_OTU#583                | 0 | 0 | 0 | 0 | 0 | 0 | 0 | 0 | 0  | 1 | 1 | 0 | 0 | 0 | 0 | 0 | 0 | 0 |
| Coprococcus_OTU#584                | 0 | 0 | 0 | 0 | 0 | 0 | 0 | 0 | 0  | 1 | 0 | 0 | 0 | 0 | 0 | 0 | 0 | 0 |
| Paludibacter_OTU#585               | 0 | 0 | 0 | 0 | 0 | 0 | 0 | 0 | 0  | 1 | 0 | 0 | 0 | 0 | 0 | 0 | 0 | 0 |
| Anaerophaga_OTU#586                | 0 | 0 | 0 | 0 | 0 | 1 | 0 | 0 | 1  | 1 | 1 | 1 | 0 | 0 | 0 | 0 | 0 | 0 |
| Marvinbryantia_OTU#587             | 0 | 0 | 0 | 0 | 0 | 0 | 0 | 0 | 0  | 1 | 0 | 0 | 0 | 0 | 0 | 0 | 0 | 0 |
| Lachnobacterium_OTU#588            | 0 | 0 | 0 | 0 | 0 | 0 | 0 | 0 | 0  | 1 | 0 | 0 | 0 | 0 | 0 | 0 | 0 | 0 |
| Lachnobacterium_OTU#589            | 0 | 0 | 0 | 0 | 0 | 0 | 0 | 0 | 0  | 2 | 1 | 1 | 0 | 0 | 0 | 0 | 0 | 0 |
| Lactobacillus_OTU#590              | 0 | 0 | 0 | 0 | 0 | 0 | 0 | 0 | 0  | 1 | 0 | 0 | 0 | 0 | 0 | 0 | 0 | 0 |
| Oscillibacter_OTU#591              | 0 | 0 | 0 | 0 | 0 | 0 | 0 | 0 | 0  | 1 | 0 | 0 | 0 | 0 | 0 | 0 | 0 | 0 |
| Marvinbryantia_OTU#592             | 0 | 0 | 0 | 0 | 0 | 0 | 0 | 0 | 0  | 1 | 0 | 0 | 1 | 0 | 0 | 0 | 0 | 0 |
| Paludibacter_OTU#593               | 0 | 0 | 0 | 0 | 0 | 0 | 0 | 0 | 0  | 1 | 0 | 0 | 0 | 0 | 0 | 0 | 0 | 0 |
| Marvinbryantia_OTU#594             | 0 | 0 | 0 | 0 | 0 | 0 | 0 | 0 | 0  | 1 | 0 | 0 | 0 | 0 | 0 | 0 | 0 | 0 |
| Roseburia_OTU#595                  | 0 | 0 | 0 | 0 | 0 | 0 | 0 | 0 | 0  | 3 | 0 | 0 | 0 | 0 | 0 | 0 | 0 | 0 |
| unclassified Clostridiales_OTU#596 | 0 | 0 | 0 | 0 | 0 | 0 | 5 | 8 | 58 | 1 | 1 | 0 | 0 | 0 | 0 | 0 | 0 | 0 |
| Oscillibacter_OTU#597              | 0 | 0 | 0 | 0 | 0 | 0 | 0 | 0 | 0  | 1 | 0 | 0 | 0 | 0 | 0 | 0 | 0 | 0 |
| Roseburia_OTU#598                  | 0 | 0 | 0 | 0 | 0 | 0 | 0 | 0 | 0  | 1 | 0 | 0 | 0 | 0 | 0 | 0 | 0 | 0 |
| Lachnobacterium_OTU#599            | 0 | 0 | 0 | 0 | 0 | 0 | 0 | 0 | 0  | 1 | 0 | 0 | 0 | 0 | 0 | 0 | 0 | 0 |
| Butyrivibrio_OTU#600               | 0 | 0 | 0 | 0 | 0 | 0 | 0 | 0 | 0  | 1 | 1 | 0 | 0 | 0 | 0 | 0 | 0 | 0 |
| Limibacter_OTU#601                 | 0 | 0 | 0 | 0 | 0 | 0 | 0 | 0 | 0  | 1 | 0 | 0 | 0 | 0 | 0 | 0 | 0 | 0 |
| Marvinbryantia_OTU#602             | 0 | 0 | 0 | 0 | 0 | 0 | 0 | 0 | 0  | 2 | 0 | 0 | 0 | 0 | 0 | 0 | 0 | 0 |
| Robinsoniella_OTU#603              | 0 | 0 | 0 | 0 | 0 | 0 | 0 | 0 | 0  | 1 | 0 | 0 | 0 | 0 | 0 | 0 | 0 | 0 |
| Acetitomaculum_OTU#604             | 0 | 0 | 1 | 1 | 0 | 0 | 0 | 0 | 0  | 4 | 5 | 4 | 1 | 0 | 0 | 0 | 0 | 0 |
| Butyricoccus_OTU#605               | 0 | 0 | 0 | 0 | 0 | 0 | 0 | 0 | 0  | 1 | 1 | 1 | 0 | 0 | 0 | 0 | 0 | 0 |
| Robinsoniella_OTU#606              | 0 | 0 | 0 | 0 | 0 | 0 | 0 | 0 | 0  | 1 | 0 | 0 | 0 | 0 | 0 | 0 | 0 | 0 |
| Pseudozobellia_OTU#607             | 0 | 0 | 0 | 0 | 0 | 0 | 0 | 0 | 0  | 1 | 0 | 0 | 0 | 0 | 0 | 0 | 0 | 0 |
| Tannerella_OTU#608                 | 0 | 0 | 0 | 0 | 0 | 0 | 0 | 0 | 0  | 1 | 0 | 0 | 0 | 0 | 0 | 0 | 0 | 0 |
| Acetitomaculum_OTU#609             | 0 | 0 | 0 | 0 | 0 | 0 | 0 | 0 | 0  | 1 | 0 | 0 | 0 | 0 | 0 | 0 | 0 | 0 |
| Butyricoccus_OTU#610               | 0 | 0 | 0 | 0 | 0 | 0 | 0 | 0 | 0  | 1 | 0 | 0 | 0 | 0 | 0 | 0 | 0 | 0 |
| Dorea_OTU#611                      | 0 | 0 | 0 | 0 | 0 | 0 | 0 | 0 | 0  | 2 | 3 | 0 | 2 | 0 | 0 | 0 | 0 | 0 |
| Anaerophaga_OTU#612                | 0 | 0 | 0 | 0 | 0 | 0 | 0 | 0 | 0  | 1 | 0 | 0 | 0 | 0 | 0 | 0 | 0 | 0 |
| Lactobacillus_OTU#613              | 0 | 0 | 0 | 0 | 0 | 0 | 0 | 0 | 0  | 1 | 0 | 1 | 0 | 0 | 0 | 0 | 0 | 0 |
| Bacteroides_OTU#614                | 0 | 0 | 0 | 0 | 0 | 0 | 0 | 0 | 0  | 1 | 0 | 0 | 1 | 0 | 0 | 6 | 1 | 0 |

Supplementary Table 5

|                            |   |   |   |   |   |   |   |   |   |   |    |   |   |   |   |   |   |
|----------------------------|---|---|---|---|---|---|---|---|---|---|----|---|---|---|---|---|---|
| Robinsoniella_OTU#615      | 0 | 0 | 0 | 0 | 0 | 0 | 0 | 0 | 0 | 2 | 0  | 0 | 0 | 0 | 0 | 0 | 0 |
| Parasutterella_OTU#616     | 0 | 0 | 0 | 0 | 0 | 0 | 0 | 0 | 0 | 1 | 0  | 0 | 0 | 0 | 0 | 0 | 0 |
| Lachnobacterium_OTU#617    | 0 | 0 | 0 | 0 | 0 | 0 | 0 | 0 | 0 | 2 | 0  | 0 | 0 | 0 | 0 | 0 | 0 |
| Pseudozobellia_OTU#618     | 0 | 0 | 0 | 0 | 0 | 0 | 0 | 0 | 0 | 1 | 0  | 0 | 0 | 0 | 0 | 0 | 0 |
| Oscillibacter_OTU#619      | 0 | 0 | 0 | 0 | 0 | 0 | 0 | 0 | 0 | 2 | 19 | 3 | 0 | 0 | 0 | 0 | 0 |
| Acetitomaculum_OTU#620     | 0 | 0 | 1 | 3 | 0 | 0 | 0 | 0 | 0 | 4 | 5  | 0 | 0 | 0 | 0 | 0 | 0 |
| Lactobacillus_OTU#621      | 0 | 0 | 0 | 0 | 0 | 0 | 0 | 0 | 0 | 1 | 0  | 1 | 0 | 0 | 0 | 0 | 0 |
| Barnesiella_OTU#622        | 0 | 0 | 0 | 0 | 0 | 0 | 0 | 0 | 0 | 1 | 0  | 0 | 0 | 0 | 0 | 0 | 0 |
| Paludibacter_OTU#623       | 0 | 0 | 0 | 0 | 0 | 0 | 0 | 0 | 0 | 1 | 0  | 0 | 0 | 0 | 0 | 0 | 0 |
| Limibacter_OTU#624         | 0 | 0 | 0 | 0 | 0 | 0 | 0 | 0 | 0 | 1 | 0  | 0 | 0 | 0 | 0 | 0 | 0 |
| Robinsoniella_OTU#625      | 0 | 0 | 0 | 0 | 0 | 0 | 0 | 0 | 0 | 1 | 0  | 0 | 0 | 0 | 0 | 0 | 0 |
| Limibacter_OTU#626         | 0 | 0 | 0 | 0 | 0 | 0 | 0 | 0 | 0 | 1 | 0  | 0 | 0 | 0 | 0 | 0 | 0 |
| Paludibacter_OTU#627       | 0 | 0 | 0 | 0 | 0 | 0 | 0 | 0 | 0 | 1 | 0  | 0 | 0 | 0 | 0 | 0 | 0 |
| Syntrophococcus_OTU#628    | 0 | 0 | 0 | 0 | 0 | 0 | 0 | 0 | 0 | 1 | 0  | 0 | 0 | 0 | 0 | 0 | 0 |
| Oscillibacter_OTU#629      | 0 | 0 | 0 | 0 | 0 | 0 | 0 | 0 | 0 | 1 | 0  | 0 | 0 | 0 | 0 | 0 | 0 |
| Effluviibacter_OTU#630     | 0 | 0 | 0 | 0 | 0 | 0 | 0 | 0 | 0 | 1 | 0  | 0 | 0 | 0 | 0 | 0 | 0 |
| Rikenella_OTU#631          | 0 | 0 | 0 | 0 | 0 | 0 | 0 | 0 | 0 | 1 | 0  | 1 | 0 | 0 | 0 | 0 | 0 |
| Butyrivibrio_OTU#632       | 0 | 0 | 0 | 0 | 0 | 0 | 0 | 0 | 0 | 1 | 0  | 0 | 0 | 0 | 0 | 0 | 0 |
| Coprococcus_OTU#633        | 0 | 0 | 0 | 0 | 0 | 0 | 0 | 0 | 0 | 1 | 0  | 0 | 0 | 0 | 0 | 0 | 0 |
| Limibacter_OTU#634         | 0 | 0 | 0 | 0 | 0 | 0 | 0 | 0 | 0 | 1 | 0  | 0 | 0 | 0 | 0 | 0 | 0 |
| Paludibacter_OTU#635       | 0 | 0 | 0 | 0 | 0 | 0 | 0 | 0 | 0 | 1 | 0  | 0 | 0 | 0 | 0 | 0 | 0 |
| Anaerophaga_OTU#636        | 0 | 0 | 0 | 0 | 0 | 0 | 0 | 0 | 0 | 1 | 0  | 1 | 3 | 0 | 0 | 0 | 0 |
| Anaerophaga_OTU#637        | 0 | 0 | 0 | 0 | 0 | 0 | 0 | 0 | 0 | 1 | 0  | 0 | 0 | 0 | 0 | 0 | 0 |
| Syntrophococcus_OTU#638    | 0 | 0 | 0 | 0 | 0 | 0 | 0 | 0 | 0 | 1 | 0  | 0 | 0 | 0 | 0 | 0 | 0 |
| Parasporobacterium_OTU#639 | 0 | 0 | 0 | 0 | 0 | 0 | 0 | 0 | 0 | 1 | 0  | 0 | 0 | 0 | 0 | 0 | 0 |
| Oscillibacter_OTU#640      | 0 | 0 | 0 | 0 | 0 | 0 | 0 | 0 | 0 | 1 | 0  | 0 | 0 | 0 | 0 | 0 | 0 |
| Oscillibacter_OTU#641      | 0 | 0 | 0 | 0 | 0 | 0 | 0 | 0 | 0 | 1 | 0  | 0 | 0 | 0 | 0 | 0 | 0 |
| Butyricoccus_OTU#642       | 0 | 0 | 0 | 0 | 0 | 0 | 0 | 0 | 0 | 1 | 0  | 0 | 1 | 0 | 0 | 0 | 0 |
| Oscillibacter_OTU#643      | 0 | 0 | 0 | 0 | 0 | 0 | 0 | 0 | 0 | 1 | 1  | 1 | 1 | 0 | 0 | 0 | 0 |
| Howardella_OTU#644         | 0 | 0 | 0 | 0 | 0 | 0 | 0 | 0 | 0 | 2 | 5  | 0 | 1 | 0 | 0 | 0 | 0 |
| Dorea_OTU#645              | 0 | 0 | 0 | 0 | 0 | 0 | 0 | 0 | 0 | 1 | 0  | 0 | 0 | 0 | 0 | 0 | 0 |
| Coprococcus_OTU#646        | 0 | 0 | 0 | 0 | 0 | 0 | 0 | 0 | 0 | 1 | 0  | 0 | 0 | 0 | 0 | 0 | 0 |
| Marvinbryantia_OTU#647     | 0 | 0 | 0 | 0 | 0 | 0 | 0 | 0 | 0 | 1 | 0  | 0 | 0 | 0 | 0 | 0 | 0 |

Supplementary Table 5

|                                    |   |   |   |   |   |   |   |   |   |   |   |   |   |   |   |   |   |
|------------------------------------|---|---|---|---|---|---|---|---|---|---|---|---|---|---|---|---|---|
| Robinsoniella_OTU#648              | 0 | 0 | 0 | 0 | 0 | 0 | 0 | 1 | 2 | 1 | 0 | 0 | 0 | 0 | 0 | 0 | 0 |
| Oscillibacter_OTU#649              | 0 | 0 | 0 | 0 | 0 | 0 | 0 | 0 | 0 | 1 | 0 | 0 | 0 | 0 | 0 | 0 | 0 |
| Syntrophococcus_OTU#650            | 0 | 0 | 0 | 0 | 0 | 0 | 0 | 0 | 0 | 1 | 0 | 1 | 0 | 0 | 0 | 0 | 0 |
| Paludibacter_OTU#651               | 0 | 0 | 0 | 0 | 0 | 0 | 0 | 0 | 0 | 1 | 0 | 1 | 2 | 0 | 0 | 0 | 0 |
| Dorea_OTU#652                      | 0 | 0 | 0 | 0 | 0 | 0 | 0 | 0 | 0 | 1 | 0 | 0 | 0 | 0 | 0 | 0 | 0 |
| Paludibacter_OTU#653               | 0 | 0 | 0 | 0 | 0 | 0 | 0 | 0 | 0 | 1 | 0 | 0 | 0 | 0 | 0 | 0 | 0 |
| Limibacter_OTU#654                 | 0 | 0 | 0 | 0 | 0 | 0 | 0 | 0 | 0 | 1 | 0 | 0 | 0 | 0 | 0 | 0 | 0 |
| Anaerophaga_OTU#655                | 0 | 0 | 0 | 0 | 0 | 0 | 0 | 0 | 0 | 1 | 1 | 0 | 0 | 0 | 0 | 0 | 0 |
| Acetitomaculum_OTU#656             | 0 | 0 | 0 | 0 | 0 | 0 | 0 | 0 | 0 | 1 | 0 | 0 | 0 | 0 | 0 | 0 | 0 |
| Barnesiella_OTU#657                | 0 | 0 | 0 | 0 | 0 | 0 | 0 | 0 | 0 | 1 | 0 | 0 | 0 | 0 | 0 | 0 | 0 |
| Robinsoniella_OTU#658              | 0 | 0 | 0 | 0 | 0 | 0 | 0 | 0 | 0 | 1 | 0 | 0 | 0 | 0 | 0 | 0 | 0 |
| Robinsoniella_OTU#659              | 0 | 0 | 0 | 0 | 0 | 0 | 0 | 0 | 0 | 1 | 0 | 1 | 0 | 0 | 0 | 0 | 0 |
| Parasporobacterium_OTU#660         | 0 | 0 | 0 | 0 | 0 | 0 | 0 | 0 | 0 | 1 | 1 | 0 | 1 | 0 | 0 | 0 | 0 |
| Butyrivibrio_OTU#661               | 0 | 0 | 0 | 0 | 0 | 0 | 0 | 0 | 0 | 1 | 3 | 0 | 0 | 0 | 0 | 0 | 0 |
| Marvinbryantia_OTU#662             | 0 | 0 | 0 | 0 | 0 | 0 | 0 | 0 | 0 | 1 | 0 | 0 | 0 | 0 | 0 | 0 | 0 |
| Lachnobacterium_OTU#663            | 0 | 0 | 0 | 0 | 0 | 0 | 0 | 0 | 0 | 1 | 0 | 0 | 0 | 0 | 0 | 0 | 0 |
| Paludibacter_OTU#664               | 0 | 0 | 0 | 0 | 0 | 0 | 0 | 0 | 0 | 2 | 0 | 0 | 0 | 0 | 0 | 0 | 0 |
| Marvinbryantia_OTU#665             | 0 | 0 | 0 | 0 | 0 | 0 | 0 | 0 | 0 | 1 | 0 | 0 | 0 | 0 | 0 | 0 | 0 |
| Coprococcus_OTU#666                | 0 | 0 | 0 | 0 | 0 | 0 | 0 | 0 | 0 | 1 | 0 | 0 | 0 | 0 | 0 | 0 | 0 |
| Anaerophaga_OTU#667                | 0 | 0 | 0 | 0 | 0 | 0 | 0 | 0 | 0 | 1 | 0 | 0 | 0 | 0 | 0 | 0 | 0 |
| Syntrophothermus_OTU#668           | 0 | 0 | 0 | 0 | 0 | 0 | 0 | 0 | 0 | 1 | 0 | 0 | 0 | 0 | 0 | 0 | 0 |
| Syntrophothermus_OTU#669           | 0 | 0 | 0 | 0 | 0 | 0 | 0 | 0 | 0 | 1 | 0 | 0 | 0 | 0 | 0 | 0 | 0 |
| unclassified Clostridiales_OTU#670 | 0 | 0 | 0 | 0 | 0 | 0 | 0 | 0 | 0 | 2 | 0 | 0 | 0 | 0 | 0 | 0 | 0 |
| Syntrophothermus_OTU#671           | 0 | 0 | 0 | 0 | 0 | 0 | 0 | 0 | 0 | 1 | 0 | 0 | 0 | 0 | 0 | 0 | 0 |
| Marvinbryantia_OTU#672             | 0 | 0 | 0 | 0 | 0 | 0 | 0 | 0 | 0 | 1 | 2 | 0 | 0 | 0 | 0 | 0 | 0 |
| Paludibacter_OTU#673               | 0 | 0 | 0 | 0 | 0 | 0 | 0 | 0 | 0 | 1 | 1 | 0 | 0 | 0 | 0 | 0 | 0 |
| Limibacter_OTU#674                 | 0 | 0 | 0 | 0 | 0 | 0 | 0 | 0 | 0 | 1 | 0 | 0 | 0 | 0 | 0 | 0 | 0 |
| Barnesiella_OTU#675                | 0 | 0 | 0 | 0 | 0 | 0 | 0 | 0 | 0 | 1 | 1 | 1 | 3 | 0 | 0 | 0 | 3 |
| Acetitomaculum_OTU#676             | 0 | 0 | 0 | 0 | 0 | 0 | 0 | 0 | 0 | 1 | 0 | 0 | 0 | 0 | 0 | 0 | 0 |
| Coprococcus_OTU#677                | 0 | 0 | 0 | 0 | 0 | 0 | 0 | 0 | 0 | 1 | 0 | 0 | 0 | 0 | 0 | 0 | 0 |
| Coprococcus_OTU#678                | 0 | 0 | 0 | 0 | 0 | 0 | 0 | 0 | 0 | 1 | 0 | 0 | 0 | 0 | 0 | 0 | 0 |
| Paludibacter_OTU#679               | 0 | 0 | 0 | 0 | 0 | 0 | 0 | 0 | 0 | 1 | 0 | 0 | 0 | 0 | 0 | 0 | 0 |
| Marvinbryantia_OTU#680             | 0 | 0 | 0 | 0 | 0 | 0 | 0 | 0 | 0 | 1 | 6 | 0 | 0 | 0 | 0 | 0 | 0 |

Supplementary Table 5

|                                    |   |   |    |   |   |    |   |    |   |   |   |   |   |   |   |   |   |
|------------------------------------|---|---|----|---|---|----|---|----|---|---|---|---|---|---|---|---|---|
| Butyrivibrio_OTU#681               | 0 | 0 | 0  | 0 | 0 | 0  | 0 | 0  | 0 | 1 | 0 | 0 | 0 | 0 | 0 | 0 | 0 |
| Paludibacter_OTU#682               | 0 | 0 | 0  | 0 | 0 | 0  | 0 | 0  | 0 | 1 | 0 | 0 | 0 | 0 | 0 | 0 | 0 |
| Robinsoniella_OTU#683              | 0 | 0 | 0  | 0 | 0 | 0  | 0 | 0  | 0 | 1 | 0 | 0 | 0 | 0 | 0 | 0 | 0 |
| Paludibacter_OTU#684               | 0 | 0 | 0  | 0 | 0 | 0  | 0 | 0  | 0 | 1 | 0 | 0 | 0 | 0 | 0 | 0 | 0 |
| Butyrivibrio_OTU#685               | 0 | 0 | 0  | 0 | 0 | 0  | 0 | 0  | 0 | 1 | 3 | 1 | 0 | 0 | 0 | 0 | 0 |
| Marvinbryantia_OTU#686             | 0 | 0 | 0  | 0 | 0 | 0  | 0 | 0  | 0 | 1 | 0 | 0 | 0 | 0 | 0 | 0 | 0 |
| Robinsoniella_OTU#687              | 0 | 0 | 0  | 0 | 0 | 0  | 0 | 0  | 0 | 1 | 0 | 0 | 0 | 0 | 0 | 0 | 0 |
| Butyrivibrio_OTU#688               | 0 | 0 | 0  | 0 | 0 | 0  | 0 | 0  | 0 | 2 | 0 | 0 | 0 | 0 | 0 | 0 | 0 |
| Paludibacter_OTU#689               | 0 | 0 | 0  | 0 | 0 | 0  | 0 | 0  | 0 | 1 | 0 | 0 | 0 | 0 | 0 | 0 | 0 |
| unclassified Bacteroidales_OTU#690 | 0 | 0 | 1  | 0 | 0 | 0  | 0 | 0  | 0 | 1 | 0 | 0 | 0 | 0 | 0 | 0 | 0 |
| Lachnobacterium_OTU#691            | 0 | 0 | 0  | 0 | 0 | 0  | 0 | 0  | 0 | 1 | 0 | 0 | 0 | 0 | 0 | 0 | 0 |
| Caminicella_OTU#692                | 0 | 0 | 0  | 0 | 0 | 0  | 0 | 0  | 0 | 1 | 0 | 0 | 0 | 0 | 0 | 0 | 0 |
| Lachnobacterium_OTU#693            | 0 | 0 | 0  | 0 | 0 | 0  | 0 | 0  | 0 | 1 | 1 | 0 | 0 | 0 | 0 | 0 | 0 |
| Paludibacter_OTU#694               | 0 | 0 | 0  | 0 | 0 | 0  | 0 | 0  | 0 | 1 | 0 | 0 | 0 | 0 | 0 | 0 | 0 |
| Anaerotruncus_OTU#695              | 0 | 0 | 0  | 0 | 0 | 0  | 0 | 0  | 0 | 1 | 0 | 0 | 0 | 0 | 0 | 0 | 0 |
| Achromobacter_OTU#696              | 0 | 0 | 0  | 0 | 0 | 0  | 0 | 0  | 0 | 1 | 0 | 0 | 0 | 0 | 0 | 0 | 1 |
| Limibacter_OTU#697                 | 0 | 0 | 0  | 0 | 0 | 0  | 0 | 0  | 0 | 1 | 0 | 1 | 1 | 0 | 0 | 0 | 0 |
| Butyricoccus_OTU#698               | 0 | 0 | 0  | 0 | 0 | 0  | 0 | 0  | 0 | 1 | 0 | 0 | 0 | 0 | 0 | 0 | 0 |
| Acetitomaculum_OTU#699             | 0 | 0 | 0  | 0 | 0 | 0  | 0 | 0  | 0 | 1 | 0 | 0 | 0 | 0 | 0 | 0 | 0 |
| Anaerotruncus_OTU#700              | 0 | 0 | 0  | 0 | 0 | 0  | 0 | 0  | 0 | 1 | 0 | 0 | 0 | 0 | 0 | 0 | 0 |
| Dorea_OTU#701                      | 0 | 0 | 0  | 0 | 0 | 0  | 0 | 0  | 0 | 1 | 0 | 0 | 0 | 0 | 0 | 0 | 0 |
| Barnesiella_OTU#702                | 0 | 0 | 0  | 0 | 0 | 1  | 0 | 0  | 0 | 0 | 0 | 0 | 0 | 0 | 0 | 0 | 0 |
| Paludibacter_OTU#703               | 0 | 0 | 0  | 0 | 0 | 2  | 1 | 2  | 1 | 0 | 0 | 0 | 1 | 0 | 0 | 0 | 0 |
| Helicobacter_OTU#704               | 0 | 0 | 21 | 7 | 0 | 4  | 8 | 13 | 6 | 0 | 0 | 0 | 1 | 0 | 0 | 0 | 1 |
| Ureaplasma_OTU#705                 | 0 | 0 | 0  | 0 | 0 | 11 | 2 | 9  | 4 | 0 | 0 | 0 | 0 | 0 | 0 | 0 | 0 |
| Parasutterella_OTU#706             | 0 | 0 | 0  | 0 | 0 | 1  | 0 | 0  | 0 | 0 | 0 | 0 | 0 | 0 | 0 | 0 | 0 |
| Paludibacter_OTU#707               | 0 | 0 | 0  | 0 | 0 | 1  | 0 | 0  | 0 | 0 | 0 | 0 | 0 | 0 | 0 | 0 | 0 |
| Paludibacter_OTU#708               | 0 | 0 | 1  | 0 | 0 | 1  | 0 | 3  | 0 | 0 | 0 | 0 | 0 | 0 | 0 | 0 | 0 |
| Rikenella_OTU#709                  | 0 | 0 | 0  | 0 | 0 | 1  | 1 | 0  | 1 | 0 | 0 | 0 | 1 | 0 | 0 | 0 | 0 |
| Paludibacter_OTU#710               | 0 | 0 | 0  | 0 | 0 | 1  | 0 | 0  | 0 | 0 | 0 | 0 | 0 | 0 | 0 | 0 | 0 |
| Paludibacter_OTU#711               | 0 | 0 | 0  | 0 | 0 | 2  | 1 | 0  | 0 | 0 | 0 | 0 | 0 | 0 | 0 | 0 | 0 |
| Paludibacter_OTU#712               | 0 | 0 | 0  | 1 | 0 | 1  | 0 | 0  | 0 | 0 | 0 | 0 | 0 | 0 | 0 | 0 | 0 |
| Paludibacter_OTU#713               | 0 | 0 | 0  | 0 | 0 | 1  | 0 | 0  | 0 | 0 | 0 | 0 | 0 | 0 | 0 | 0 | 0 |

Supplementary Table 5

|                                    |   |   |   |   |   |   |   |   |   |   |   |   |   |   |   |   |   |   |
|------------------------------------|---|---|---|---|---|---|---|---|---|---|---|---|---|---|---|---|---|---|
| Paludibacter_OTU#714               | 0 | 0 | 0 | 0 | 0 | 1 | 0 | 0 | 0 | 0 | 0 | 0 | 0 | 0 | 0 | 0 | 0 | 0 |
| Limibacter_OTU#715                 | 0 | 0 | 0 | 0 | 0 | 1 | 0 | 0 | 0 | 0 | 0 | 0 | 0 | 0 | 0 | 0 | 0 | 0 |
| Paludibacter_OTU#716               | 0 | 0 | 0 | 0 | 0 | 1 | 0 | 0 | 0 | 0 | 0 | 0 | 0 | 0 | 0 | 0 | 0 | 0 |
| Limibacter_OTU#717                 | 0 | 0 | 1 | 0 | 0 | 2 | 0 | 0 | 0 | 0 | 0 | 0 | 0 | 0 | 0 | 0 | 0 | 0 |
| Paludibacter_OTU#718               | 0 | 0 | 0 | 0 | 0 | 1 | 0 | 0 | 0 | 0 | 0 | 0 | 0 | 0 | 0 | 0 | 0 | 0 |
| Limibacter_OTU#719                 | 0 | 0 | 0 | 0 | 0 | 1 | 0 | 0 | 0 | 0 | 0 | 0 | 0 | 0 | 0 | 0 | 0 | 0 |
| Barnesiella_OTU#720                | 0 | 0 | 0 | 0 | 0 | 1 | 1 | 0 | 0 | 0 | 0 | 0 | 1 | 0 | 1 | 0 | 0 | 0 |
| Hallella_OTU#721                   | 0 | 0 | 0 | 0 | 0 | 1 | 0 | 0 | 0 | 0 | 0 | 0 | 0 | 0 | 0 | 0 | 0 | 0 |
| Paludibacter_OTU#722               | 0 | 0 | 0 | 0 | 0 | 1 | 0 | 0 | 0 | 0 | 0 | 0 | 0 | 0 | 0 | 0 | 0 | 0 |
| Anaerovorax_OTU#723                | 0 | 0 | 0 | 0 | 0 | 1 | 0 | 0 | 0 | 0 | 0 | 0 | 0 | 0 | 0 | 0 | 0 | 0 |
| Paludibacter_OTU#724               | 0 | 0 | 0 | 0 | 0 | 1 | 0 | 0 | 0 | 0 | 0 | 0 | 0 | 0 | 0 | 0 | 0 | 0 |
| Parasutterella_OTU#725             | 0 | 0 | 0 | 0 | 0 | 1 | 0 | 0 | 0 | 0 | 0 | 0 | 0 | 0 | 0 | 0 | 0 | 0 |
| Limibacter_OTU#726                 | 0 | 0 | 0 | 0 | 0 | 1 | 0 | 0 | 0 | 0 | 0 | 0 | 0 | 0 | 0 | 0 | 0 | 0 |
| Limibacter_OTU#727                 | 0 | 0 | 0 | 0 | 0 | 1 | 0 | 0 | 0 | 0 | 0 | 0 | 0 | 0 | 0 | 0 | 0 | 0 |
| Tannerella_OTU#728                 | 0 | 0 | 0 | 0 | 0 | 1 | 0 | 0 | 0 | 0 | 0 | 0 | 0 | 0 | 0 | 0 | 0 | 0 |
| Paludibacter_OTU#729               | 0 | 0 | 0 | 0 | 0 | 1 | 0 | 0 | 0 | 0 | 0 | 0 | 0 | 0 | 0 | 0 | 0 | 0 |
| Limibacter_OTU#730                 | 0 | 0 | 0 | 0 | 0 | 1 | 0 | 0 | 0 | 0 | 0 | 0 | 0 | 0 | 0 | 0 | 0 | 0 |
| Rikenella_OTU#731                  | 0 | 0 | 0 | 0 | 0 | 1 | 0 | 0 | 0 | 0 | 0 | 0 | 0 | 0 | 0 | 0 | 0 | 0 |
| Paludibacter_OTU#732               | 0 | 0 | 0 | 0 | 0 | 1 | 1 | 0 | 0 | 0 | 0 | 0 | 1 | 0 | 0 | 3 | 0 | 0 |
| Anaerophaga_OTU#733                | 0 | 0 | 0 | 0 | 0 | 1 | 0 | 0 | 0 | 0 | 0 | 0 | 0 | 0 | 0 | 0 | 0 | 0 |
| Rikenella_OTU#734                  | 0 | 0 | 0 | 0 | 0 | 1 | 0 | 0 | 0 | 0 | 0 | 0 | 0 | 0 | 1 | 0 | 0 | 0 |
| Paludibacter_OTU#735               | 0 | 0 | 0 | 0 | 0 | 1 | 0 | 1 | 0 | 0 | 0 | 1 | 0 | 0 | 0 | 0 | 0 | 0 |
| Paludibacter_OTU#736               | 0 | 0 | 0 | 0 | 0 | 1 | 0 | 0 | 0 | 0 | 0 | 0 | 0 | 0 | 0 | 0 | 0 | 0 |
| unclassified Bacteroidales_OTU#737 | 0 | 0 | 0 | 0 | 0 | 2 | 1 | 0 | 1 | 0 | 0 | 0 | 0 | 0 | 0 | 0 | 0 | 0 |
| Paludibacter_OTU#738               | 0 | 0 | 0 | 0 | 0 | 1 | 0 | 1 | 0 | 0 | 0 | 0 | 0 | 0 | 0 | 0 | 0 | 0 |
| Helicobacter_OTU#739               | 0 | 0 | 0 | 0 | 0 | 1 | 0 | 0 | 0 | 0 | 0 | 0 | 0 | 0 | 0 | 0 | 0 | 0 |
| Rikenella_OTU#740                  | 0 | 0 | 0 | 0 | 0 | 2 | 0 | 0 | 0 | 0 | 0 | 0 | 0 | 0 | 0 | 0 | 0 | 0 |
| Paludibacter_OTU#741               | 0 | 0 | 0 | 0 | 0 | 1 | 0 | 0 | 0 | 0 | 0 | 0 | 0 | 0 | 0 | 0 | 0 | 0 |
| Paludibacter_OTU#742               | 0 | 0 | 0 | 0 | 0 | 1 | 0 | 0 | 0 | 0 | 0 | 0 | 0 | 0 | 0 | 0 | 0 | 0 |
| Paludibacter_OTU#743               | 0 | 0 | 0 | 0 | 0 | 2 | 1 | 0 | 0 | 0 | 0 | 0 | 0 | 0 | 0 | 0 | 0 | 0 |
| Limibacter_OTU#744                 | 0 | 0 | 0 | 0 | 0 | 1 | 0 | 0 | 0 | 0 | 0 | 0 | 0 | 0 | 0 | 0 | 0 | 0 |
| Limibacter_OTU#745                 | 0 | 0 | 0 | 0 | 0 | 1 | 0 | 0 | 0 | 0 | 0 | 0 | 0 | 0 | 0 | 0 | 0 | 0 |
| Limibacter_OTU#746                 | 0 | 0 | 0 | 0 | 0 | 1 | 0 | 0 | 0 | 0 | 0 | 0 | 0 | 0 | 0 | 0 | 0 | 0 |

Supplementary Table 5



|                                    |   |   |   |   |   |   |   |   |   |   |   |   |   |   |   |   |   |   |
|------------------------------------|---|---|---|---|---|---|---|---|---|---|---|---|---|---|---|---|---|---|
| Paludibacter_OTU#747               | 0 | 0 | 0 | 0 | 0 | 1 | 0 | 0 | 0 | 0 | 0 | 0 | 0 | 0 | 0 | 0 | 0 | 0 |
| Barnesiella_OTU#748                | 0 | 0 | 0 | 0 | 0 | 1 | 0 | 2 | 0 | 0 | 0 | 0 | 1 | 0 | 0 | 0 | 0 | 0 |
| unclassified Bacteroidetes_OTU#749 | 0 | 0 | 0 | 0 | 0 | 1 | 0 | 0 | 0 | 0 | 0 | 0 | 1 | 0 | 0 | 0 | 0 | 0 |
| Enterorhabdus_OTU#750              | 0 | 0 | 0 | 0 | 0 | 1 | 0 | 0 | 0 | 0 | 1 | 0 | 0 | 0 | 0 | 0 | 0 | 0 |
| Rikenella_OTU#751                  | 0 | 0 | 0 | 0 | 0 | 1 | 0 | 0 | 0 | 0 | 0 | 0 | 0 | 0 | 0 | 0 | 0 | 0 |
| Limibacter_OTU#752                 | 0 | 0 | 0 | 0 | 0 | 1 | 0 | 0 | 0 | 0 | 0 | 0 | 0 | 0 | 0 | 0 | 0 | 0 |
| Paludibacter_OTU#753               | 0 | 0 | 0 | 0 | 0 | 1 | 0 | 0 | 0 | 0 | 0 | 0 | 0 | 0 | 0 | 0 | 0 | 0 |
| Limibacter_OTU#754                 | 0 | 0 | 0 | 1 | 0 | 1 | 0 | 0 | 0 | 0 | 0 | 1 | 1 | 0 | 0 | 0 | 0 | 0 |
| Parasutterella_OTU#755             | 0 | 0 | 0 | 0 | 0 | 1 | 0 | 0 | 0 | 0 | 0 | 0 | 0 | 0 | 0 | 0 | 0 | 0 |
| Paludibacter_OTU#756               | 0 | 0 | 0 | 0 | 0 | 1 | 0 | 0 | 0 | 0 | 0 | 0 | 0 | 0 | 0 | 0 | 0 | 0 |
| Limibacter_OTU#757                 | 0 | 0 | 0 | 0 | 0 | 1 | 0 | 0 | 0 | 0 | 0 | 0 | 0 | 0 | 0 | 0 | 0 | 0 |
| Paludibacter_OTU#758               | 0 | 0 | 0 | 0 | 0 | 0 | 0 | 0 | 0 | 0 | 0 | 0 | 0 | 0 | 3 | 2 | 0 | 0 |
| Paludibacter_OTU#759               | 0 | 0 | 0 | 0 | 0 | 0 | 0 | 0 | 0 | 0 | 0 | 0 | 0 | 0 | 1 | 0 | 0 | 0 |
| Paludibacter_OTU#760               | 0 | 0 | 0 | 0 | 0 | 0 | 0 | 0 | 0 | 0 | 0 | 0 | 0 | 0 | 1 | 0 | 0 | 0 |
| Rikenella_OTU#761                  | 0 | 0 | 0 | 0 | 0 | 0 | 0 | 0 | 0 | 0 | 0 | 0 | 0 | 0 | 1 | 0 | 0 | 0 |
| Paludibacter_OTU#762               | 0 | 0 | 0 | 0 | 0 | 0 | 0 | 0 | 0 | 0 | 0 | 0 | 0 | 0 | 1 | 0 | 0 | 0 |
| Lactobacillus_OTU#763              | 0 | 0 | 0 | 0 | 0 | 0 | 0 | 0 | 0 | 0 | 0 | 0 | 0 | 0 | 1 | 0 | 0 | 0 |
| Paludibacter_OTU#764               | 0 | 0 | 0 | 0 | 0 | 0 | 0 | 0 | 0 | 0 | 0 | 0 | 0 | 0 | 1 | 0 | 0 | 0 |
| Rikenella_OTU#765                  | 0 | 0 | 0 | 0 | 0 | 0 | 0 | 0 | 0 | 0 | 0 | 0 | 0 | 0 | 1 | 0 | 0 | 0 |
| Paludibacter_OTU#766               | 0 | 0 | 0 | 0 | 0 | 0 | 0 | 0 | 0 | 0 | 0 | 0 | 0 | 0 | 1 | 0 | 0 | 0 |
| Paludibacter_OTU#767               | 0 | 0 | 0 | 0 | 0 | 0 | 0 | 0 | 0 | 0 | 0 | 0 | 0 | 0 | 1 | 0 | 0 | 0 |
| Lactobacillus_OTU#768              | 0 | 0 | 0 | 0 | 0 | 0 | 0 | 0 | 0 | 0 | 0 | 0 | 0 | 0 | 1 | 0 | 0 | 0 |
| Rikenella_OTU#769                  | 0 | 0 | 0 | 0 | 0 | 0 | 0 | 0 | 0 | 0 | 0 | 0 | 0 | 0 | 1 | 0 | 0 | 0 |
| Allobaculum_OTU#770                | 0 | 0 | 1 | 1 | 0 | 0 | 0 | 0 | 0 | 0 | 0 | 0 | 0 | 0 | 0 | 0 | 0 | 0 |
| Allobaculum_OTU#771                | 0 | 0 | 1 | 0 | 0 | 0 | 0 | 0 | 0 | 0 | 0 | 0 | 0 | 0 | 0 | 0 | 0 | 0 |
| Paludibacter_OTU#772               | 0 | 0 | 1 | 0 | 0 | 0 | 0 | 0 | 0 | 0 | 0 | 0 | 0 | 0 | 0 | 0 | 0 | 0 |
| Paludibacter_OTU#773               | 0 | 0 | 1 | 0 | 0 | 0 | 0 | 0 | 0 | 0 | 0 | 0 | 0 | 0 | 0 | 0 | 0 | 0 |
| Anaerophaga_OTU#774                | 0 | 0 | 1 | 0 | 0 | 0 | 0 | 1 | 0 | 0 | 0 | 0 | 0 | 0 | 0 | 0 | 0 | 0 |
| Barnesiella_OTU#775                | 0 | 0 | 1 | 0 | 0 | 0 | 0 | 0 | 0 | 0 | 0 | 0 | 0 | 0 | 0 | 0 | 0 | 0 |
| Syntrophococcus_OTU#776            | 0 | 0 | 1 | 3 | 0 | 0 | 0 | 0 | 0 | 0 | 0 | 2 | 2 | 0 | 0 | 0 | 0 | 0 |
| Lachnobacterium_OTU#777            | 0 | 0 | 2 | 0 | 0 | 0 | 0 | 0 | 0 | 0 | 0 | 0 | 0 | 0 | 0 | 0 | 0 | 0 |
| Helicobacter_OTU#778               | 0 | 0 | 1 | 0 | 0 | 0 | 0 | 0 | 0 | 0 | 0 | 0 | 0 | 0 | 0 | 0 | 0 | 0 |
| Coprococcus_OTU#779                | 0 | 0 | 1 | 0 | 0 | 0 | 0 | 0 | 0 | 0 | 0 | 0 | 0 | 0 | 0 | 0 | 0 | 0 |

Supplementary Table 5

|                         |   |   |   |   |   |   |   |   |   |   |   |   |   |   |   |   |   |
|-------------------------|---|---|---|---|---|---|---|---|---|---|---|---|---|---|---|---|---|
| Akkermansia_OTU#780     | 0 | 0 | 1 | 0 | 0 | 0 | 0 | 0 | 0 | 0 | 0 | 1 | 0 | 0 | 0 | 0 | 0 |
| Limibacter_OTU#781      | 0 | 0 | 1 | 0 | 0 | 0 | 0 | 0 | 0 | 0 | 0 | 0 | 0 | 0 | 0 | 0 | 0 |
| Paludibacter_OTU#782    | 0 | 0 | 1 | 0 | 0 | 0 | 0 | 0 | 0 | 0 | 0 | 0 | 0 | 0 | 0 | 0 | 0 |
| Allobaculum_OTU#783     | 0 | 0 | 1 | 0 | 0 | 0 | 0 | 0 | 0 | 0 | 0 | 0 | 0 | 0 | 0 | 0 | 0 |
| Paludibacter_OTU#784    | 0 | 0 | 1 | 0 | 0 | 0 | 0 | 0 | 0 | 0 | 0 | 0 | 0 | 0 | 0 | 0 | 0 |
| Limibacter_OTU#785      | 0 | 0 | 1 | 0 | 0 | 0 | 0 | 0 | 0 | 0 | 0 | 0 | 0 | 0 | 0 | 0 | 0 |
| Paludibacter_OTU#786    | 0 | 0 | 1 | 0 | 0 | 0 | 0 | 0 | 0 | 0 | 0 | 0 | 0 | 0 | 0 | 0 | 0 |
| Allobaculum_OTU#787     | 0 | 0 | 1 | 0 | 0 | 0 | 0 | 0 | 0 | 0 | 0 | 0 | 0 | 0 | 0 | 0 | 0 |
| Anaerophaga_OTU#788     | 0 | 0 | 1 | 0 | 0 | 0 | 0 | 0 | 0 | 0 | 0 | 0 | 0 | 0 | 0 | 0 | 0 |
| Limibacter_OTU#789      | 0 | 0 | 1 | 0 | 0 | 0 | 0 | 0 | 0 | 0 | 0 | 0 | 0 | 0 | 0 | 0 | 0 |
| Anaerophaga_OTU#790     | 0 | 0 | 1 | 0 | 0 | 0 | 0 | 0 | 0 | 0 | 0 | 0 | 0 | 0 | 0 | 0 | 0 |
| Paludibacter_OTU#791    | 0 | 0 | 1 | 0 | 0 | 0 | 1 | 0 | 0 | 0 | 0 | 2 | 1 | 0 | 0 | 0 | 0 |
| Paludibacter_OTU#792    | 0 | 0 | 1 | 0 | 0 | 0 | 0 | 0 | 0 | 0 | 0 | 0 | 0 | 0 | 0 | 0 | 0 |
| Limibacter_OTU#793      | 0 | 0 | 1 | 0 | 0 | 0 | 0 | 0 | 0 | 0 | 0 | 0 | 0 | 0 | 0 | 0 | 0 |
| Parabacteroides_OTU#794 | 0 | 0 | 1 | 0 | 0 | 0 | 0 | 0 | 0 | 0 | 0 | 0 | 0 | 0 | 0 | 0 | 0 |
| Paludibacter_OTU#795    | 0 | 0 | 1 | 0 | 0 | 0 | 0 | 0 | 0 | 0 | 0 | 0 | 0 | 0 | 0 | 0 | 0 |
| Paludibacter_OTU#796    | 0 | 0 | 1 | 0 | 0 | 0 | 1 | 1 | 0 | 0 | 0 | 0 | 0 | 0 | 1 | 0 | 0 |
| Paludibacter_OTU#797    | 0 | 0 | 1 | 0 | 0 | 0 | 0 | 0 | 0 | 0 | 1 | 0 | 0 | 0 | 0 | 0 | 0 |
| Barnesiella_OTU#798     | 0 | 0 | 1 | 0 | 0 | 0 | 0 | 0 | 0 | 0 | 0 | 0 | 0 | 0 | 0 | 0 | 0 |
| Paludibacter_OTU#799    | 0 | 0 | 1 | 0 | 0 | 0 | 0 | 0 | 0 | 0 | 0 | 0 | 0 | 0 | 0 | 0 | 0 |
| Lachnobacterium_OTU#800 | 0 | 0 | 1 | 0 | 0 | 0 | 0 | 0 | 0 | 0 | 0 | 0 | 0 | 0 | 0 | 0 | 0 |
| Paludibacter_OTU#801    | 0 | 0 | 1 | 1 | 0 | 0 | 0 | 0 | 0 | 0 | 0 | 0 | 0 | 0 | 0 | 0 | 0 |
| Paludibacter_OTU#802    | 0 | 0 | 1 | 0 | 0 | 0 | 0 | 0 | 0 | 0 | 0 | 0 | 0 | 0 | 0 | 0 | 0 |
| Anaerophaga_OTU#803     | 0 | 0 | 1 | 0 | 0 | 0 | 0 | 0 | 0 | 0 | 0 | 0 | 0 | 0 | 0 | 0 | 0 |
| Barnesiella_OTU#804     | 0 | 0 | 1 | 0 | 0 | 0 | 0 | 0 | 0 | 0 | 0 | 0 | 0 | 0 | 0 | 0 | 0 |
| Paludibacter_OTU#805    | 0 | 0 | 1 | 0 | 0 | 0 | 0 | 0 | 0 | 0 | 0 | 0 | 0 | 0 | 0 | 0 | 0 |
| Rikenella_OTU#806       | 0 | 0 | 1 | 0 | 0 | 0 | 0 | 0 | 0 | 0 | 0 | 0 | 0 | 0 | 0 | 0 | 0 |
| Heliobacillus_OTU#807   | 0 | 0 | 1 | 2 | 0 | 0 | 0 | 0 | 0 | 0 | 0 | 0 | 0 | 0 | 0 | 0 | 0 |
| Barnesiella_OTU#808     | 0 | 0 | 1 | 0 | 0 | 0 | 0 | 0 | 0 | 0 | 0 | 0 | 0 | 0 | 0 | 0 | 0 |
| Paludibacter_OTU#809    | 0 | 0 | 1 | 0 | 0 | 0 | 0 | 0 | 0 | 0 | 0 | 0 | 0 | 0 | 0 | 0 | 0 |
| Dorea_OTU#810           | 0 | 0 | 1 | 0 | 0 | 0 | 0 | 0 | 0 | 0 | 0 | 0 | 0 | 0 | 0 | 0 | 0 |
| Limibacter_OTU#811      | 0 | 0 | 2 | 0 | 0 | 0 | 0 | 0 | 0 | 0 | 0 | 0 | 0 | 0 | 0 | 0 | 0 |
| Barnesiella_OTU#812     | 0 | 0 | 1 | 0 | 0 | 0 | 0 | 1 | 0 | 0 | 1 | 0 | 3 | 0 | 0 | 0 | 0 |

Supplementary Table 5

|                         |   |   |   |   |   |   |   |   |   |   |   |   |   |   |   |   |   |   |
|-------------------------|---|---|---|---|---|---|---|---|---|---|---|---|---|---|---|---|---|---|
| Limibacter_OTU#813      | 0 | 0 | 3 | 0 | 0 | 0 | 1 | 0 | 0 | 0 | 0 | 0 | 0 | 0 | 0 | 0 | 0 | 0 |
| Heliobacillus_OTU#814   | 0 | 0 | 1 | 0 | 0 | 0 | 0 | 0 | 0 | 0 | 0 | 0 | 0 | 0 | 0 | 0 | 0 | 0 |
| Paludibacter_OTU#815    | 0 | 0 | 2 | 0 | 0 | 0 | 0 | 0 | 0 | 0 | 0 | 0 | 0 | 0 | 0 | 0 | 0 | 0 |
| Paludibacter_OTU#816    | 0 | 0 | 1 | 0 | 0 | 0 | 0 | 0 | 0 | 0 | 0 | 0 | 0 | 0 | 0 | 0 | 0 | 0 |
| Barnesiella_OTU#817     | 0 | 0 | 1 | 0 | 0 | 0 | 0 | 0 | 0 | 0 | 0 | 0 | 0 | 0 | 0 | 0 | 0 | 0 |
| Lachnobacterium_OTU#818 | 0 | 0 | 1 | 0 | 0 | 0 | 0 | 0 | 0 | 0 | 0 | 0 | 0 | 0 | 0 | 0 | 0 | 0 |
| Paludibacter_OTU#819    | 0 | 0 | 1 | 0 | 0 | 0 | 0 | 0 | 0 | 0 | 0 | 0 | 0 | 0 | 0 | 0 | 0 | 0 |
| Anaerophaga_OTU#820     | 0 | 0 | 1 | 0 | 0 | 0 | 0 | 0 | 0 | 0 | 0 | 0 | 0 | 0 | 0 | 0 | 0 | 0 |
| Rikenella_OTU#821       | 0 | 0 | 1 | 0 | 0 | 0 | 0 | 0 | 1 | 0 | 0 | 0 | 0 | 0 | 0 | 0 | 0 | 0 |
| Helicobacter_OTU#822    | 0 | 0 | 1 | 0 | 0 | 0 | 0 | 0 | 0 | 0 | 0 | 0 | 0 | 0 | 0 | 0 | 0 | 0 |
| Paludibacter_OTU#823    | 0 | 0 | 1 | 0 | 0 | 0 | 0 | 0 | 0 | 0 | 0 | 0 | 0 | 0 | 0 | 0 | 0 | 0 |
| Syntrophococcus_OTU#824 | 0 | 0 | 1 | 6 | 0 | 0 | 0 | 0 | 0 | 0 | 3 | 0 | 0 | 0 | 0 | 0 | 0 | 0 |
| Lachnobacterium_OTU#825 | 0 | 0 | 1 | 0 | 0 | 0 | 0 | 0 | 0 | 0 | 0 | 0 | 0 | 0 | 0 | 0 | 0 | 0 |
| Limibacter_OTU#826      | 0 | 0 | 1 | 0 | 0 | 0 | 0 | 0 | 0 | 0 | 0 | 0 | 0 | 0 | 0 | 0 | 0 | 0 |
| Limibacter_OTU#827      | 0 | 0 | 1 | 0 | 0 | 0 | 0 | 0 | 0 | 0 | 0 | 0 | 0 | 0 | 0 | 0 | 0 | 0 |
| Anaerophaga_OTU#828     | 0 | 0 | 1 | 0 | 0 | 0 | 0 | 0 | 0 | 0 | 0 | 0 | 0 | 0 | 0 | 0 | 0 | 0 |
| Tannerella_OTU#829      | 0 | 0 | 1 | 0 | 0 | 0 | 0 | 0 | 0 | 0 | 0 | 0 | 0 | 0 | 0 | 0 | 0 | 0 |
| Barnesiella_OTU#830     | 0 | 0 | 1 | 0 | 0 | 0 | 0 | 0 | 0 | 0 | 0 | 0 | 0 | 0 | 0 | 0 | 0 | 0 |
| Paludibacter_OTU#831    | 0 | 0 | 1 | 0 | 0 | 0 | 0 | 0 | 0 | 0 | 0 | 0 | 1 | 0 | 0 | 0 | 0 | 0 |
| Barnesiella_OTU#832     | 0 | 0 | 2 | 0 | 0 | 0 | 0 | 0 | 0 | 0 | 0 | 0 | 0 | 0 | 0 | 0 | 0 | 0 |
| Limibacter_OTU#833      | 0 | 0 | 1 | 0 | 0 | 0 | 0 | 0 | 0 | 0 | 0 | 0 | 0 | 0 | 0 | 0 | 0 | 0 |
| Limibacter_OTU#834      | 0 | 0 | 1 | 0 | 0 | 0 | 0 | 0 | 0 | 0 | 0 | 0 | 0 | 0 | 0 | 0 | 0 | 0 |
| Anaerophaga_OTU#835     | 0 | 0 | 1 | 0 | 0 | 0 | 0 | 0 | 0 | 0 | 0 | 0 | 0 | 0 | 0 | 0 | 0 | 0 |
| Dorea_OTU#836           | 0 | 0 | 1 | 4 | 0 | 0 | 0 | 0 | 0 | 0 | 1 | 0 | 0 | 0 | 0 | 0 | 0 | 0 |
| Allobaculum_OTU#837     | 0 | 0 | 1 | 0 | 0 | 0 | 0 | 0 | 0 | 0 | 0 | 0 | 0 | 0 | 0 | 0 | 0 | 0 |
| Paludibacter_OTU#838    | 0 | 0 | 1 | 0 | 0 | 0 | 0 | 0 | 0 | 0 | 0 | 0 | 0 | 0 | 0 | 0 | 0 | 0 |
| Anaerophaga_OTU#839     | 0 | 0 | 1 | 0 | 0 | 0 | 0 | 0 | 0 | 0 | 0 | 0 | 0 | 0 | 0 | 0 | 0 | 0 |
| Aquiflexum_OTU#840      | 0 | 0 | 1 | 0 | 0 | 0 | 0 | 0 | 0 | 0 | 0 | 0 | 0 | 0 | 0 | 0 | 0 | 0 |
| Nubsella_OTU#841        | 0 | 0 | 1 | 0 | 0 | 0 | 0 | 0 | 0 | 0 | 0 | 0 | 0 | 0 | 0 | 0 | 0 | 0 |
| Paludibacter_OTU#842    | 0 | 0 | 1 | 0 | 0 | 0 | 0 | 0 | 0 | 0 | 0 | 0 | 0 | 0 | 0 | 0 | 0 | 0 |
| Syntrophococcus_OTU#843 | 0 | 0 | 1 | 0 | 0 | 0 | 0 | 0 | 0 | 0 | 0 | 0 | 0 | 0 | 0 | 0 | 0 | 0 |
| Paludibacter_OTU#844    | 0 | 0 | 1 | 0 | 0 | 0 | 0 | 0 | 0 | 0 | 0 | 0 | 0 | 0 | 0 | 0 | 0 | 0 |
| Paludibacter_OTU#845    | 0 | 0 | 1 | 2 | 0 | 0 | 0 | 0 | 0 | 0 | 1 | 1 | 1 | 0 | 0 | 0 | 0 | 0 |

Supplementary Table 5

|                                      |   |   |   |   |   |   |   |   |   |   |    |   |   |   |   |   |   |   |
|--------------------------------------|---|---|---|---|---|---|---|---|---|---|----|---|---|---|---|---|---|---|
| Anaerophaga_OTU#846                  | 0 | 0 | 1 | 0 | 0 | 0 | 0 | 0 | 0 | 0 | 0  | 0 | 0 | 0 | 0 | 0 | 0 | 0 |
| Anaerophaga_OTU#847                  | 0 | 0 | 1 | 0 | 0 | 0 | 0 | 0 | 0 | 0 | 0  | 0 | 0 | 0 | 0 | 0 | 0 | 0 |
| Paludibacter_OTU#848                 | 0 | 0 | 1 | 0 | 0 | 0 | 0 | 0 | 0 | 0 | 0  | 0 | 0 | 0 | 0 | 0 | 0 | 0 |
| Paludibacter_OTU#849                 | 0 | 0 | 1 | 0 | 0 | 0 | 0 | 0 | 0 | 0 | 0  | 0 | 0 | 0 | 0 | 0 | 0 | 0 |
| Paludibacter_OTU#850                 | 0 | 0 | 1 | 0 | 0 | 0 | 0 | 0 | 0 | 0 | 0  | 0 | 0 | 0 | 0 | 0 | 0 | 0 |
| Limibacter_OTU#851                   | 0 | 0 | 1 | 0 | 0 | 0 | 0 | 0 | 0 | 0 | 0  | 0 | 0 | 0 | 0 | 0 | 0 | 0 |
| Helicobacter_OTU#852                 | 0 | 0 | 1 | 0 | 0 | 0 | 1 | 0 | 0 | 0 | 0  | 0 | 0 | 0 | 0 | 0 | 0 | 0 |
| Barnesiella_OTU#853                  | 0 | 0 | 1 | 0 | 0 | 0 | 0 | 0 | 0 | 0 | 0  | 0 | 0 | 0 | 0 | 0 | 0 | 0 |
| Limibacter_OTU#854                   | 0 | 0 | 1 | 0 | 0 | 0 | 0 | 0 | 0 | 0 | 0  | 0 | 0 | 0 | 0 | 0 | 0 | 0 |
| Paludibacter_OTU#855                 | 0 | 0 | 1 | 0 | 0 | 0 | 0 | 0 | 0 | 0 | 0  | 0 | 0 | 0 | 0 | 0 | 0 | 0 |
| Papillibacter_OTU#856                | 0 | 0 | 1 | 0 | 0 | 0 | 0 | 0 | 0 | 0 | 0  | 0 | 0 | 0 | 0 | 0 | 0 | 0 |
| Allobaculum_OTU#857                  | 0 | 0 | 1 | 0 | 0 | 0 | 0 | 0 | 0 | 0 | 0  | 0 | 0 | 0 | 0 | 0 | 0 | 0 |
| Limibacter_OTU#858                   | 0 | 0 | 1 | 0 | 0 | 0 | 0 | 0 | 0 | 0 | 0  | 0 | 0 | 0 | 0 | 0 | 0 | 0 |
| Xylanibacter_OTU#859                 | 0 | 0 | 1 | 0 | 0 | 0 | 0 | 0 | 0 | 0 | 0  | 1 | 1 | 0 | 0 | 0 | 0 | 0 |
| Anaerophaga_OTU#860                  | 0 | 0 | 1 | 0 | 0 | 0 | 0 | 0 | 0 | 0 | 0  | 0 | 0 | 0 | 0 | 0 | 0 | 0 |
| Hydrogenoanaerobacterium_OTU#861     | 0 | 0 | 1 | 0 | 0 | 0 | 0 | 0 | 0 | 0 | 0  | 0 | 0 | 0 | 0 | 0 | 0 | 0 |
| Butyricoccus_OTU#862                 | 0 | 0 | 1 | 0 | 0 | 0 | 0 | 0 | 0 | 0 | 0  | 0 | 0 | 0 | 0 | 0 | 0 | 0 |
| unclassified Bacteroidales_OTU#863   | 0 | 0 | 1 | 0 | 0 | 0 | 0 | 0 | 0 | 0 | 0  | 0 | 1 | 0 | 0 | 0 | 0 | 0 |
| Pseudozobellia_OTU#864               | 0 | 0 | 1 | 0 | 0 | 0 | 0 | 0 | 0 | 0 | 0  | 0 | 0 | 0 | 0 | 0 | 0 | 0 |
| Helicobacter_OTU#865                 | 0 | 0 | 1 | 0 | 0 | 0 | 1 | 0 | 0 | 0 | 0  | 0 | 0 | 0 | 0 | 0 | 0 | 0 |
| Limibacter_OTU#866                   | 0 | 0 | 1 | 0 | 0 | 0 | 0 | 0 | 0 | 0 | 0  | 0 | 0 | 0 | 0 | 0 | 0 | 0 |
| Limibacter_OTU#867                   | 0 | 0 | 1 | 0 | 0 | 0 | 0 | 0 | 0 | 0 | 0  | 0 | 0 | 0 | 0 | 0 | 0 | 0 |
| Robinsoniella_OTU#868                | 0 | 0 | 0 | 0 | 0 | 0 | 0 | 0 | 0 | 0 | 31 | 0 | 1 | 0 | 0 | 0 | 0 | 0 |
| unclassified Lachnospiraceae_OTU#869 | 0 | 0 | 0 | 0 | 0 | 0 | 0 | 0 | 0 | 0 | 2  | 0 | 0 | 0 | 0 | 0 | 0 | 0 |
| Marvinbryantia_OTU#870               | 0 | 0 | 0 | 0 | 0 | 0 | 0 | 0 | 0 | 0 | 2  | 0 | 0 | 0 | 0 | 0 | 0 | 0 |
| Sporobacterium_OTU#871               | 0 | 0 | 0 | 0 | 0 | 0 | 0 | 0 | 0 | 0 | 1  | 0 | 0 | 0 | 0 | 0 | 0 | 0 |
| Robinsoniella_OTU#872                | 0 | 0 | 0 | 0 | 0 | 0 | 0 | 0 | 0 | 0 | 5  | 1 | 0 | 0 | 0 | 0 | 0 | 0 |
| Oscillibacter_OTU#873                | 0 | 0 | 0 | 0 | 0 | 0 | 0 | 0 | 0 | 0 | 1  | 0 | 0 | 0 | 0 | 0 | 0 | 0 |
| Acetitomaculum_OTU#874               | 0 | 0 | 0 | 0 | 0 | 0 | 0 | 0 | 0 | 0 | 4  | 1 | 0 | 0 | 0 | 0 | 0 | 0 |
| Barnesiella_OTU#875                  | 0 | 0 | 0 | 0 | 0 | 0 | 0 | 0 | 0 | 0 | 5  | 6 | 3 | 0 | 0 | 0 | 0 | 0 |
| Dorea_OTU#876                        | 0 | 0 | 0 | 0 | 0 | 0 | 0 | 0 | 0 | 0 | 1  | 0 | 0 | 0 | 0 | 0 | 0 | 0 |
| Blautia_OTU#877                      | 0 | 0 | 0 | 2 | 0 | 0 | 0 | 0 | 0 | 0 | 9  | 0 | 1 | 0 | 0 | 0 | 0 | 0 |
| Butyrivibrio_OTU#878                 | 0 | 0 | 0 | 0 | 0 | 0 | 0 | 0 | 0 | 0 | 3  | 0 | 0 | 0 | 0 | 0 | 0 | 0 |

Supplementary Table 5

|                              |   |   |   |   |   |   |   |   |   |   |    |   |   |   |   |   |   |
|------------------------------|---|---|---|---|---|---|---|---|---|---|----|---|---|---|---|---|---|
| Robinsoniella_OTU#879        | 0 | 0 | 0 | 0 | 0 | 0 | 0 | 0 | 0 | 0 | 1  | 0 | 0 | 0 | 0 | 0 | 0 |
| Marvinbryantia_OTU#880       | 0 | 0 | 0 | 0 | 0 | 0 | 0 | 0 | 0 | 0 | 1  | 0 | 0 | 0 | 0 | 0 | 0 |
| Howardella_OTU#881           | 0 | 0 | 0 | 0 | 0 | 0 | 0 | 0 | 0 | 0 | 1  | 0 | 0 | 0 | 0 | 0 | 0 |
| Coprococcus_OTU#882          | 0 | 0 | 0 | 0 | 0 | 0 | 0 | 0 | 0 | 0 | 8  | 1 | 0 | 0 | 0 | 0 | 0 |
| Butyricococcus_OTU#883       | 0 | 0 | 0 | 0 | 0 | 0 | 0 | 0 | 0 | 0 | 1  | 0 | 0 | 0 | 0 | 0 | 0 |
| Robinsoniella_OTU#884        | 0 | 0 | 0 | 0 | 0 | 0 | 0 | 0 | 0 | 0 | 10 | 0 | 1 | 0 | 0 | 0 | 0 |
| Peptococcus_OTU#885          | 0 | 0 | 0 | 0 | 0 | 0 | 0 | 0 | 0 | 0 | 1  | 0 | 0 | 0 | 0 | 0 | 0 |
| Dorea_OTU#886                | 0 | 0 | 0 | 0 | 0 | 0 | 0 | 0 | 0 | 0 | 1  | 0 | 0 | 0 | 0 | 0 | 0 |
| Acetitomaculum_OTU#887       | 0 | 0 | 0 | 0 | 0 | 0 | 0 | 0 | 0 | 0 | 1  | 0 | 0 | 0 | 0 | 0 | 0 |
| Marvinbryantia_OTU#888       | 0 | 0 | 0 | 0 | 0 | 0 | 0 | 0 | 0 | 0 | 2  | 0 | 0 | 0 | 0 | 0 | 0 |
| Roseburia_OTU#889            | 0 | 0 | 0 | 0 | 0 | 0 | 0 | 0 | 0 | 0 | 1  | 0 | 0 | 0 | 0 | 0 | 0 |
| Butyrivibrio_OTU#890         | 0 | 0 | 0 | 0 | 0 | 0 | 0 | 0 | 0 | 0 | 11 | 0 | 0 | 0 | 0 | 0 | 0 |
| Marvinbryantia_OTU#891       | 0 | 0 | 0 | 1 | 0 | 0 | 0 | 0 | 0 | 0 | 2  | 0 | 0 | 0 | 0 | 0 | 0 |
| Pseudoxanthomonas_OTU#892    | 0 | 0 | 0 | 0 | 0 | 0 | 0 | 0 | 0 | 0 | 2  | 0 | 0 | 0 | 0 | 0 | 0 |
| Butyricococcus_OTU#893       | 0 | 0 | 0 | 0 | 0 | 0 | 0 | 0 | 0 | 0 | 1  | 0 | 0 | 0 | 0 | 0 | 0 |
| Lachnobacterium_OTU#894      | 0 | 0 | 0 | 0 | 0 | 0 | 0 | 0 | 0 | 0 | 1  | 0 | 0 | 0 | 0 | 0 | 0 |
| Paludibacter_OTU#895         | 0 | 0 | 0 | 0 | 0 | 0 | 0 | 0 | 0 | 0 | 1  | 0 | 0 | 0 | 0 | 0 | 0 |
| Marvinbryantia_OTU#896       | 0 | 0 | 0 | 0 | 0 | 0 | 0 | 0 | 0 | 0 | 1  | 0 | 0 | 0 | 0 | 0 | 0 |
| Paludibacter_OTU#897         | 0 | 0 | 0 | 0 | 0 | 0 | 0 | 0 | 0 | 0 | 1  | 0 | 0 | 0 | 0 | 0 | 0 |
| Robinsoniella_OTU#898        | 0 | 0 | 0 | 0 | 0 | 0 | 0 | 0 | 0 | 0 | 1  | 0 | 0 | 0 | 0 | 0 | 0 |
| Robinsoniella_OTU#899        | 0 | 0 | 0 | 0 | 0 | 0 | 0 | 0 | 0 | 0 | 1  | 0 | 0 | 0 | 0 | 0 | 0 |
| Turcibacter_OTU#900          | 0 | 0 | 0 | 0 | 0 | 0 | 0 | 0 | 0 | 0 | 10 | 0 | 5 | 0 | 0 | 0 | 0 |
| Paludibacter_OTU#901         | 0 | 0 | 0 | 0 | 0 | 0 | 0 | 0 | 0 | 0 | 1  | 0 | 0 | 0 | 0 | 0 | 0 |
| Robinsoniella_OTU#902        | 0 | 0 | 0 | 0 | 0 | 0 | 0 | 0 | 0 | 0 | 1  | 0 | 0 | 0 | 0 | 0 | 0 |
| Anaerophaga_OTU#903          | 0 | 0 | 0 | 0 | 0 | 0 | 0 | 0 | 0 | 0 | 1  | 0 | 0 | 0 | 0 | 0 | 0 |
| Eggerthella_OTU#904          | 0 | 0 | 0 | 0 | 0 | 0 | 0 | 0 | 0 | 0 | 1  | 0 | 0 | 0 | 0 | 0 | 0 |
| Dorea_OTU#905                | 0 | 0 | 0 | 0 | 0 | 0 | 0 | 0 | 0 | 0 | 1  | 0 | 0 | 0 | 0 | 0 | 0 |
| Ruminococcus_OTU#906         | 0 | 0 | 0 | 0 | 0 | 0 | 0 | 0 | 0 | 0 | 1  | 0 | 0 | 0 | 0 | 0 | 0 |
| Robinsoniella_OTU#907        | 0 | 0 | 0 | 0 | 0 | 0 | 0 | 0 | 0 | 0 | 1  | 0 | 0 | 0 | 0 | 0 | 0 |
| Dorea_OTU#908                | 0 | 0 | 0 | 0 | 0 | 0 | 0 | 0 | 0 | 0 | 1  | 0 | 0 | 0 | 0 | 0 | 0 |
| Escherichia/Shigella_OTU#909 | 0 | 0 | 0 | 0 | 0 | 0 | 0 | 0 | 0 | 0 | 1  | 0 | 0 | 0 | 0 | 0 | 0 |
| Butyrivibrio_OTU#910         | 0 | 0 | 0 | 0 | 0 | 0 | 0 | 0 | 0 | 0 | 1  | 0 | 0 | 0 | 0 | 0 | 0 |
| Streptophyta_OTU#911         | 0 | 0 | 0 | 0 | 0 | 0 | 0 | 0 | 0 | 0 | 1  | 0 | 0 | 0 | 0 | 0 | 0 |

Supplementary Table 5

|                              |   |   |   |   |   |   |   |   |   |   |   |   |   |   |   |   |   |
|------------------------------|---|---|---|---|---|---|---|---|---|---|---|---|---|---|---|---|---|
| Terasakiella_OTU#912         | 0 | 0 | 0 | 0 | 0 | 0 | 0 | 0 | 0 | 0 | 6 | 1 | 0 | 0 | 0 | 0 | 0 |
| Chlorophyta_OTU#913          | 0 | 0 | 0 | 0 | 0 | 0 | 0 | 0 | 0 | 0 | 1 | 0 | 0 | 0 | 0 | 0 | 0 |
| Butyrivibrio_OTU#914         | 0 | 0 | 0 | 0 | 0 | 0 | 0 | 0 | 0 | 0 | 1 | 0 | 0 | 0 | 0 | 0 | 0 |
| Blautia_OTU#915              | 0 | 0 | 0 | 3 | 0 | 0 | 0 | 0 | 0 | 0 | 8 | 0 | 0 | 0 | 0 | 0 | 0 |
| Parabacteroides_OTU#916      | 0 | 0 | 0 | 0 | 0 | 0 | 0 | 0 | 0 | 0 | 3 | 0 | 0 | 0 | 0 | 0 | 0 |
| Robinsoniella_OTU#917        | 0 | 0 | 0 | 0 | 0 | 0 | 0 | 0 | 0 | 0 | 1 | 0 | 0 | 0 | 0 | 0 | 0 |
| Syntrophococcus_OTU#918      | 0 | 0 | 0 | 0 | 0 | 0 | 0 | 0 | 0 | 0 | 1 | 2 | 1 | 0 | 0 | 0 | 0 |
| Anaerotruncus_OTU#919        | 0 | 0 | 0 | 0 | 0 | 0 | 0 | 0 | 0 | 0 | 1 | 1 | 1 | 0 | 0 | 0 | 0 |
| Barnesiella_OTU#920          | 0 | 0 | 0 | 0 | 0 | 0 | 0 | 0 | 0 | 0 | 1 | 0 | 0 | 0 | 0 | 0 | 0 |
| Mesorhizobium_OTU#921        | 0 | 0 | 0 | 0 | 0 | 0 | 0 | 0 | 0 | 0 | 1 | 0 | 0 | 0 | 0 | 0 | 1 |
| Blautia_OTU#922              | 0 | 0 | 0 | 0 | 0 | 0 | 0 | 0 | 0 | 0 | 1 | 0 | 0 | 0 | 0 | 0 | 0 |
| Barnesiella_OTU#923          | 0 | 0 | 0 | 0 | 0 | 0 | 0 | 0 | 0 | 0 | 1 | 0 | 0 | 0 | 0 | 0 | 0 |
| Escherichia/Shigella_OTU#924 | 0 | 0 | 0 | 0 | 0 | 0 | 0 | 0 | 0 | 0 | 3 | 0 | 0 | 0 | 0 | 0 | 0 |
| Lachnobacterium_OTU#925      | 0 | 0 | 0 | 0 | 0 | 0 | 0 | 0 | 0 | 0 | 1 | 0 | 0 | 0 | 0 | 0 | 0 |
| Parasporobacterium_OTU#926   | 0 | 0 | 0 | 0 | 0 | 0 | 0 | 0 | 0 | 0 | 1 | 0 | 0 | 0 | 0 | 0 | 0 |
| Oscillibacter_OTU#927        | 0 | 0 | 0 | 0 | 0 | 0 | 0 | 0 | 0 | 0 | 1 | 0 | 0 | 0 | 0 | 0 | 0 |
| Blautia_OTU#928              | 0 | 0 | 0 | 0 | 0 | 0 | 0 | 0 | 0 | 0 | 1 | 0 | 0 | 0 | 0 | 0 | 0 |
| Robinsoniella_OTU#929        | 0 | 0 | 0 | 0 | 0 | 0 | 0 | 0 | 0 | 0 | 1 | 0 | 0 | 0 | 0 | 0 | 0 |
| Syntrophococcus_OTU#930      | 0 | 0 | 0 | 1 | 0 | 0 | 0 | 0 | 0 | 0 | 2 | 2 | 0 | 0 | 0 | 0 | 0 |
| Butyrivibrio_OTU#931         | 0 | 0 | 0 | 0 | 0 | 0 | 0 | 0 | 0 | 0 | 1 | 0 | 0 | 0 | 0 | 0 | 0 |
| Butyrivibrio_OTU#932         | 0 | 0 | 0 | 0 | 0 | 0 | 0 | 0 | 0 | 0 | 1 | 0 | 0 | 0 | 0 | 0 | 0 |
| Oscillibacter_OTU#933        | 0 | 0 | 0 | 0 | 0 | 0 | 0 | 0 | 0 | 0 | 1 | 0 | 0 | 0 | 0 | 0 | 0 |
| Lachnobacterium_OTU#934      | 0 | 0 | 0 | 0 | 0 | 0 | 0 | 0 | 0 | 0 | 1 | 0 | 0 | 0 | 0 | 0 | 0 |
| Robinsoniella_OTU#935        | 0 | 0 | 0 | 0 | 0 | 0 | 0 | 0 | 0 | 0 | 1 | 0 | 0 | 0 | 0 | 0 | 0 |
| Butyricoccus_OTU#936         | 0 | 0 | 0 | 0 | 0 | 0 | 0 | 0 | 0 | 0 | 3 | 0 | 0 | 0 | 0 | 0 | 0 |
| Catonella_OTU#937            | 0 | 0 | 0 | 0 | 0 | 0 | 0 | 0 | 0 | 0 | 1 | 0 | 0 | 0 | 0 | 0 | 0 |
| Paludibacter_OTU#938         | 0 | 0 | 0 | 0 | 0 | 0 | 0 | 0 | 0 | 0 | 1 | 0 | 0 | 0 | 0 | 0 | 0 |
| Burkholderia_OTU#939         | 0 | 0 | 0 | 0 | 0 | 0 | 0 | 0 | 0 | 0 | 2 | 0 | 0 | 0 | 0 | 0 | 1 |
| Anaerotruncus_OTU#940        | 0 | 0 | 0 | 0 | 0 | 0 | 0 | 0 | 0 | 0 | 1 | 1 | 0 | 0 | 0 | 0 | 0 |
| Acetitomaculum_OTU#941       | 0 | 0 | 0 | 0 | 0 | 0 | 0 | 0 | 0 | 0 | 3 | 0 | 1 | 0 | 0 | 0 | 0 |
| Lawsonia_OTU#942             | 0 | 0 | 0 | 0 | 0 | 0 | 0 | 0 | 0 | 0 | 1 | 0 | 0 | 0 | 0 | 0 | 0 |
| Marvinbryantia_OTU#943       | 0 | 0 | 0 | 1 | 0 | 0 | 0 | 0 | 0 | 0 | 1 | 0 | 0 | 0 | 0 | 0 | 0 |
| Syntrophococcus_OTU#944      | 0 | 0 | 0 | 0 | 0 | 0 | 0 | 0 | 0 | 0 | 2 | 0 | 0 | 0 | 0 | 0 | 0 |

Supplementary Table 5

|                                    |   |   |   |   |   |   |   |   |   |   |   |   |   |   |   |   |   |   |
|------------------------------------|---|---|---|---|---|---|---|---|---|---|---|---|---|---|---|---|---|---|
| Streptophyta_OTU#945               | 0 | 0 | 0 | 0 | 0 | 0 | 0 | 0 | 0 | 1 | 0 | 1 | 0 | 0 | 0 | 0 | 3 | 0 |
| Butyricoccus_OTU#946               | 0 | 0 | 0 | 0 | 0 | 0 | 0 | 0 | 0 | 0 | 3 | 1 | 0 | 0 | 0 | 0 | 0 | 0 |
| Paludibacter_OTU#947               | 0 | 0 | 0 | 0 | 0 | 0 | 0 | 0 | 0 | 0 | 1 | 0 | 0 | 0 | 0 | 0 | 0 | 0 |
| Parasporobacterium_OTU#948         | 0 | 0 | 0 | 0 | 0 | 0 | 0 | 0 | 0 | 0 | 2 | 2 | 1 | 0 | 0 | 0 | 0 | 0 |
| Robinsoniella_OTU#949              | 0 | 0 | 0 | 0 | 0 | 0 | 0 | 0 | 0 | 0 | 1 | 0 | 0 | 0 | 0 | 0 | 0 | 0 |
| Marvinbryantia_OTU#950             | 0 | 0 | 0 | 0 | 0 | 0 | 0 | 0 | 0 | 0 | 1 | 0 | 0 | 0 | 0 | 0 | 0 | 0 |
| Blautia_OTU#951                    | 0 | 0 | 0 | 0 | 0 | 0 | 0 | 0 | 1 | 0 | 1 | 0 | 0 | 0 | 0 | 0 | 0 | 0 |
| Roseburia_OTU#952                  | 0 | 0 | 0 | 0 | 0 | 0 | 0 | 0 | 0 | 0 | 1 | 0 | 0 | 0 | 0 | 0 | 0 | 0 |
| Butyrivibrio_OTU#953               | 0 | 0 | 0 | 0 | 0 | 0 | 0 | 0 | 0 | 0 | 1 | 0 | 0 | 0 | 0 | 0 | 0 | 0 |
| Ruminococcus_OTU#954               | 0 | 0 | 0 | 0 | 0 | 0 | 0 | 0 | 0 | 0 | 1 | 0 | 0 | 0 | 0 | 0 | 0 | 0 |
| Anaerotruncus_OTU#955              | 0 | 0 | 0 | 0 | 0 | 0 | 0 | 0 | 0 | 0 | 1 | 0 | 0 | 0 | 0 | 0 | 0 | 0 |
| Acetitomaculum_OTU#956             | 0 | 0 | 0 | 0 | 0 | 0 | 0 | 0 | 0 | 0 | 1 | 0 | 0 | 0 | 0 | 0 | 0 | 0 |
| Marvinbryantia_OTU#957             | 0 | 0 | 0 | 0 | 0 | 0 | 0 | 0 | 0 | 0 | 1 | 0 | 0 | 0 | 0 | 0 | 0 | 0 |
| Allobaculum_OTU#958                | 0 | 0 | 0 | 0 | 0 | 0 | 0 | 0 | 0 | 0 | 1 | 0 | 0 | 0 | 0 | 0 | 0 | 0 |
| Lactonifactor_OTU#959              | 0 | 0 | 0 | 0 | 0 | 0 | 0 | 0 | 0 | 0 | 1 | 1 | 1 | 0 | 0 | 0 | 0 | 0 |
| Coprococcus_OTU#960                | 0 | 0 | 0 | 0 | 0 | 0 | 0 | 0 | 0 | 0 | 1 | 0 | 0 | 0 | 0 | 0 | 0 | 0 |
| Anaerophaga_OTU#961                | 0 | 0 | 0 | 0 | 0 | 0 | 0 | 0 | 0 | 0 | 1 | 0 | 0 | 0 | 0 | 0 | 0 | 0 |
| Rikenella_OTU#962                  | 0 | 0 | 0 | 0 | 0 | 0 | 0 | 0 | 0 | 0 | 1 | 0 | 0 | 0 | 0 | 0 | 0 | 0 |
| Parasporobacterium_OTU#963         | 0 | 0 | 0 | 0 | 0 | 0 | 0 | 0 | 0 | 0 | 1 | 0 | 0 | 0 | 0 | 0 | 0 | 0 |
| unclassified Clostridiales_OTU#964 | 0 | 0 | 0 | 2 | 0 | 0 | 0 | 0 | 0 | 0 | 1 | 1 | 0 | 0 | 0 | 0 | 0 | 0 |
| Marvinbryantia_OTU#965             | 0 | 0 | 0 | 0 | 0 | 0 | 0 | 0 | 0 | 0 | 1 | 0 | 0 | 0 | 0 | 0 | 0 | 0 |
| Robinsoniella_OTU#966              | 0 | 0 | 0 | 0 | 0 | 0 | 0 | 0 | 0 | 0 | 1 | 0 | 0 | 0 | 0 | 0 | 0 | 0 |
| Barnesiella_OTU#967                | 0 | 0 | 0 | 0 | 0 | 0 | 0 | 0 | 0 | 0 | 1 | 0 | 0 | 0 | 0 | 0 | 0 | 0 |
| Desulfobotulus_OTU#968             | 0 | 0 | 0 | 0 | 0 | 0 | 0 | 0 | 0 | 0 | 1 | 0 | 0 | 0 | 0 | 0 | 0 | 0 |
| Dorea_OTU#969                      | 0 | 0 | 0 | 0 | 0 | 0 | 0 | 0 | 0 | 0 | 1 | 0 | 0 | 0 | 0 | 0 | 0 | 0 |
| Robinsoniella_OTU#970              | 0 | 0 | 0 | 0 | 0 | 0 | 0 | 0 | 0 | 0 | 1 | 0 | 0 | 0 | 0 | 0 | 0 | 0 |
| Parasporobacterium_OTU#971         | 0 | 0 | 0 | 0 | 0 | 0 | 0 | 0 | 0 | 0 | 1 | 0 | 0 | 0 | 0 | 0 | 0 | 0 |
| Dorea_OTU#972                      | 0 | 0 | 0 | 0 | 0 | 0 | 0 | 0 | 0 | 0 | 1 | 0 | 0 | 0 | 0 | 0 | 0 | 0 |
| Butyricoccus_OTU#973               | 0 | 0 | 0 | 0 | 0 | 0 | 0 | 0 | 0 | 0 | 1 | 0 | 0 | 0 | 0 | 0 | 0 | 0 |
| Allobaculum_OTU#974                | 0 | 0 | 0 | 0 | 0 | 0 | 0 | 0 | 0 | 0 | 1 | 0 | 0 | 0 | 0 | 0 | 0 | 0 |
| Diaphorobacter_OTU#975             | 0 | 0 | 0 | 0 | 0 | 0 | 0 | 0 | 0 | 0 | 1 | 0 | 2 | 0 | 0 | 0 | 1 | 0 |
| Butyricoccus_OTU#976               | 0 | 0 | 0 | 0 | 0 | 0 | 0 | 0 | 0 | 0 | 1 | 0 | 0 | 0 | 0 | 0 | 0 | 0 |
| Stenotrophomonas_OTU#977           | 0 | 0 | 0 | 0 | 0 | 0 | 0 | 0 | 0 | 0 | 1 | 0 | 0 | 0 | 0 | 0 | 1 | 0 |

Supplementary Table 5

|                         |   |   |   |   |   |   |   |   |    |   |   |   |   |   |   |   |   |   |
|-------------------------|---|---|---|---|---|---|---|---|----|---|---|---|---|---|---|---|---|---|
| Oscillibacter_OTU#978   | 0 | 0 | 0 | 0 | 0 | 0 | 0 | 0 | 0  | 0 | 1 | 0 | 0 | 0 | 0 | 0 | 0 | 0 |
| Syntrophococcus_OTU#979 | 0 | 0 | 0 | 0 | 0 | 0 | 0 | 0 | 0  | 0 | 1 | 0 | 0 | 0 | 0 | 0 | 0 | 0 |
| Butyricococcus_OTU#980  | 0 | 0 | 0 | 0 | 0 | 0 | 0 | 0 | 0  | 0 | 1 | 0 | 0 | 0 | 0 | 0 | 0 | 0 |
| Parasutterella_OTU#981  | 0 | 0 | 0 | 0 | 0 | 0 | 0 | 0 | 0  | 0 | 1 | 0 | 0 | 0 | 0 | 0 | 0 | 0 |
| Peptococcus_OTU#982     | 0 | 0 | 0 | 0 | 0 | 0 | 0 | 0 | 0  | 0 | 2 | 0 | 0 | 0 | 0 | 0 | 0 | 0 |
| Howardella_OTU#983      | 0 | 0 | 0 | 0 | 0 | 0 | 0 | 0 | 0  | 0 | 1 | 0 | 0 | 0 | 0 | 0 | 0 | 0 |
| Anaerophaga_OTU#984     | 0 | 0 | 0 | 0 | 0 | 0 | 0 | 0 | 0  | 0 | 1 | 0 | 2 | 0 | 0 | 0 | 0 | 0 |
| Marvinbryantia_OTU#985  | 0 | 0 | 0 | 0 | 0 | 0 | 0 | 0 | 0  | 0 | 1 | 0 | 0 | 0 | 0 | 0 | 0 | 0 |
| Butyricococcus_OTU#986  | 0 | 0 | 0 | 0 | 0 | 0 | 0 | 0 | 0  | 0 | 1 | 0 | 0 | 0 | 0 | 0 | 0 | 0 |
| Butyricococcus_OTU#987  | 0 | 0 | 0 | 0 | 0 | 0 | 0 | 0 | 0  | 0 | 1 | 0 | 0 | 0 | 0 | 0 | 0 | 0 |
| Marvinbryantia_OTU#988  | 0 | 0 | 0 | 0 | 0 | 0 | 0 | 0 | 0  | 0 | 1 | 0 | 0 | 0 | 0 | 0 | 0 | 0 |
| Oscillibacter_OTU#989   | 0 | 0 | 0 | 0 | 0 | 0 | 0 | 0 | 0  | 0 | 2 | 1 | 0 | 0 | 0 | 0 | 0 | 0 |
| Howardella_OTU#990      | 0 | 0 | 0 | 0 | 0 | 0 | 0 | 0 | 0  | 0 | 1 | 0 | 0 | 0 | 0 | 0 | 0 | 0 |
| Bulleidia_OTU#991       | 0 | 0 | 0 | 0 | 0 | 0 | 0 | 0 | 0  | 0 | 1 | 0 | 0 | 0 | 0 | 0 | 0 | 0 |
| Marvinbryantia_OTU#992  | 0 | 0 | 0 | 0 | 0 | 0 | 0 | 0 | 0  | 0 | 1 | 0 | 0 | 0 | 0 | 0 | 0 | 0 |
| Howardella_OTU#993      | 0 | 0 | 0 | 0 | 0 | 0 | 0 | 0 | 0  | 0 | 1 | 0 | 0 | 0 | 0 | 0 | 0 | 0 |
| Marvinbryantia_OTU#994  | 0 | 0 | 0 | 0 | 0 | 0 | 0 | 0 | 0  | 0 | 1 | 0 | 0 | 0 | 0 | 0 | 0 | 0 |
| Acidovorax_OTU#995      | 0 | 0 | 0 | 0 | 0 | 0 | 0 | 0 | 0  | 0 | 1 | 0 | 0 | 0 | 0 | 0 | 0 | 0 |
| Marvinbryantia_OTU#996  | 0 | 0 | 0 | 0 | 0 | 0 | 0 | 0 | 0  | 0 | 1 | 0 | 0 | 0 | 0 | 0 | 0 | 0 |
| Anaerophaga_OTU#997     | 0 | 0 | 0 | 0 | 0 | 0 | 0 | 0 | 0  | 0 | 1 | 0 | 0 | 0 | 0 | 0 | 0 | 0 |
| Mucispirillum_OTU#998   | 0 | 0 | 0 | 0 | 0 | 0 | 7 | 7 | 10 | 0 | 0 | 0 | 0 | 0 | 0 | 0 | 0 | 0 |
| Paludibacter_OTU#999    | 0 | 0 | 0 | 0 | 0 | 0 | 2 | 0 | 0  | 0 | 0 | 0 | 0 | 0 | 0 | 0 | 0 | 0 |
| Anaerophaga_OTU#1000    | 0 | 0 | 0 | 0 | 0 | 0 | 1 | 0 | 0  | 0 | 0 | 0 | 0 | 0 | 0 | 0 | 0 | 0 |
| Rikenella_OTU#1001      | 0 | 0 | 0 | 0 | 0 | 0 | 3 | 0 | 0  | 0 | 0 | 0 | 0 | 0 | 0 | 0 | 0 | 0 |
| Paludibacter_OTU#1002   | 0 | 0 | 0 | 0 | 0 | 0 | 1 | 0 | 0  | 0 | 0 | 0 | 0 | 0 | 0 | 0 | 0 | 0 |
| Paludibacter_OTU#1003   | 0 | 0 | 0 | 0 | 0 | 0 | 1 | 0 | 0  | 0 | 0 | 0 | 0 | 0 | 0 | 0 | 0 | 0 |
| Allobaculum_OTU#1004    | 0 | 0 | 0 | 0 | 0 | 0 | 1 | 0 | 0  | 0 | 0 | 0 | 0 | 0 | 0 | 0 | 0 | 0 |
| Helicobacter_OTU#1005   | 0 | 0 | 0 | 0 | 0 | 0 | 1 | 0 | 1  | 0 | 0 | 0 | 0 | 0 | 0 | 0 | 0 | 0 |
| Limibacter_OTU#1006     | 0 | 0 | 0 | 0 | 0 | 0 | 2 | 2 | 0  | 0 | 0 | 0 | 0 | 0 | 0 | 0 | 0 | 0 |
| Rikenella_OTU#1007      | 0 | 0 | 0 | 0 | 0 | 0 | 1 | 0 | 0  | 0 | 0 | 0 | 0 | 0 | 0 | 0 | 0 | 0 |
| Tannerella_OTU#1008     | 0 | 0 | 0 | 0 | 0 | 0 | 1 | 1 | 0  | 0 | 0 | 0 | 0 | 0 | 0 | 0 | 0 | 0 |
| Paludibacter_OTU#1009   | 0 | 0 | 0 | 0 | 0 | 0 | 1 | 0 | 0  | 0 | 0 | 0 | 0 | 0 | 0 | 0 | 0 | 0 |
| Pseudozobellia_OTU#1010 | 0 | 0 | 0 | 0 | 0 | 0 | 1 | 0 | 0  | 0 | 0 | 0 | 0 | 0 | 0 | 0 | 0 | 0 |

Supplementary Table 5



|                                          |   |   |   |   |   |   |   |    |    |   |   |   |   |   |   |   |   |   |
|------------------------------------------|---|---|---|---|---|---|---|----|----|---|---|---|---|---|---|---|---|---|
| Limibacter_OTU#1011                      | 0 | 0 | 0 | 0 | 0 | 0 | 1 | 0  | 0  | 0 | 0 | 0 | 0 | 0 | 0 | 0 | 0 | 0 |
| Robinsoniella_OTU#1012                   | 0 | 0 | 0 | 0 | 0 | 0 | 1 | 0  | 0  | 0 | 0 | 0 | 0 | 0 | 0 | 0 | 0 | 0 |
| Paludibacter_OTU#1013                    | 0 | 0 | 0 | 0 | 0 | 0 | 1 | 0  | 0  | 0 | 0 | 0 | 0 | 0 | 0 | 0 | 0 | 0 |
| Mucispirillum_OTU#1014                   | 0 | 0 | 0 | 0 | 0 | 0 | 5 | 11 | 22 | 0 | 0 | 0 | 0 | 0 | 0 | 0 | 0 | 0 |
| Tannerella_OTU#1015                      | 0 | 0 | 0 | 0 | 0 | 0 | 1 | 0  | 0  | 0 | 0 | 0 | 0 | 0 | 0 | 0 | 0 | 0 |
| unclassified Porphyromonadaceae_OTU#1016 | 0 | 0 | 0 | 1 | 0 | 0 | 1 | 0  | 1  | 0 | 0 | 0 | 1 | 0 | 0 | 0 | 0 | 0 |
| Parasutterella_OTU#1017                  | 0 | 0 | 0 | 0 | 0 | 0 | 1 | 0  | 0  | 0 | 0 | 0 | 0 | 0 | 0 | 0 | 0 | 0 |
| Rikenella_OTU#1018                       | 0 | 0 | 0 | 0 | 0 | 0 | 1 | 0  | 0  | 0 | 0 | 0 | 0 | 0 | 0 | 0 | 0 | 0 |
| Paludibacter_OTU#1019                    | 0 | 0 | 0 | 0 | 0 | 0 | 1 | 0  | 1  | 0 | 0 | 0 | 0 | 0 | 0 | 0 | 0 | 0 |
| Paludibacter_OTU#1020                    | 0 | 0 | 0 | 0 | 0 | 0 | 1 | 0  | 0  | 0 | 0 | 0 | 0 | 0 | 0 | 0 | 0 | 0 |
| Rikenella_OTU#1021                       | 0 | 0 | 0 | 0 | 0 | 0 | 1 | 0  | 0  | 0 | 0 | 0 | 0 | 0 | 0 | 0 | 0 | 0 |
| Barnesiella_OTU#1022                     | 0 | 0 | 0 | 0 | 0 | 0 | 1 | 0  | 0  | 0 | 0 | 0 | 0 | 0 | 0 | 0 | 0 | 0 |
| Paludibacter_OTU#1023                    | 0 | 0 | 0 | 0 | 0 | 0 | 1 | 0  | 0  | 0 | 0 | 0 | 0 | 0 | 0 | 0 | 0 | 0 |
| Anaerophaga_OTU#1024                     | 0 | 0 | 0 | 0 | 0 | 0 | 1 | 0  | 0  | 0 | 0 | 0 | 0 | 0 | 0 | 0 | 0 | 0 |
| Paludibacter_OTU#1025                    | 0 | 0 | 0 | 0 | 0 | 0 | 1 | 1  | 0  | 0 | 0 | 0 | 0 | 0 | 0 | 0 | 0 | 0 |
| Paludibacter_OTU#1026                    | 0 | 0 | 0 | 0 | 0 | 0 | 1 | 0  | 0  | 0 | 0 | 0 | 0 | 0 | 0 | 0 | 0 | 0 |
| Paludibacter_OTU#1027                    | 0 | 0 | 0 | 0 | 0 | 0 | 1 | 0  | 0  | 0 | 0 | 0 | 0 | 0 | 0 | 0 | 0 | 0 |
| Paludibacter_OTU#1028                    | 0 | 0 | 0 | 0 | 0 | 0 | 0 | 0  | 0  | 0 | 0 | 0 | 0 | 0 | 0 | 1 | 0 | 0 |
| Marvinbryantia_OTU#1029                  | 0 | 0 | 0 | 0 | 0 | 0 | 0 | 0  | 2  | 0 | 0 | 0 | 0 | 0 | 0 | 1 | 0 | 0 |
| Paludibacter_OTU#1030                    | 0 | 0 | 0 | 0 | 0 | 0 | 0 | 0  | 0  | 0 | 0 | 0 | 0 | 0 | 0 | 1 | 0 | 0 |
| Limibacter_OTU#1031                      | 0 | 0 | 0 | 0 | 0 | 0 | 0 | 0  | 0  | 0 | 0 | 0 | 0 | 0 | 0 | 1 | 0 | 0 |
| Anaerophaga_OTU#1032                     | 0 | 0 | 0 | 0 | 0 | 0 | 0 | 0  | 0  | 0 | 0 | 0 | 0 | 0 | 0 | 1 | 0 | 0 |
| Paludibacter_OTU#1033                    | 0 | 0 | 0 | 0 | 0 | 0 | 0 | 0  | 0  | 0 | 0 | 0 | 0 | 0 | 0 | 1 | 0 | 0 |
| Roseburia_OTU#1034                       | 0 | 0 | 0 | 0 | 0 | 0 | 0 | 0  | 0  | 0 | 0 | 0 | 0 | 0 | 0 | 1 | 0 | 0 |
| Roseburia_OTU#1035                       | 0 | 0 | 0 | 0 | 0 | 0 | 0 | 0  | 0  | 0 | 0 | 0 | 0 | 0 | 0 | 1 | 0 | 0 |
| Barnesiella_OTU#1036                     | 0 | 0 | 0 | 0 | 0 | 0 | 0 | 0  | 0  | 0 | 0 | 0 | 0 | 0 | 0 | 1 | 0 | 0 |
| Enterococcus_OTU#1037                    | 0 | 0 | 0 | 0 | 0 | 0 | 0 | 0  | 0  | 0 | 0 | 0 | 0 | 0 | 0 | 1 | 1 | 0 |
| Alloiococcus_OTU#1038                    | 0 | 0 | 0 | 0 | 0 | 0 | 0 | 0  | 0  | 0 | 0 | 0 | 0 | 0 | 0 | 1 | 0 | 0 |
| Eubacterium_OTU#1039                     | 0 | 0 | 0 | 0 | 0 | 0 | 0 | 0  | 0  | 0 | 0 | 0 | 0 | 0 | 0 | 1 | 0 | 0 |
| Paludibacter_OTU#1040                    | 0 | 0 | 0 | 0 | 0 | 0 | 0 | 0  | 0  | 0 | 0 | 1 | 0 | 0 | 0 | 2 | 0 | 0 |
| Salinihabitans_OTU#1041                  | 0 | 0 | 0 | 0 | 0 | 0 | 0 | 0  | 0  | 0 | 0 | 0 | 0 | 0 | 0 | 1 | 0 | 0 |
| Rikenella_OTU#1042                       | 0 | 0 | 0 | 0 | 0 | 0 | 0 | 0  | 1  | 0 | 0 | 0 | 0 | 0 | 0 | 1 | 0 | 0 |
| Paludibacter_OTU#1043                    | 0 | 0 | 0 | 0 | 0 | 0 | 0 | 0  | 0  | 0 | 0 | 0 | 0 | 0 | 0 | 1 | 0 | 0 |

Supplementary Table 5

|                              |   |   |   |   |   |   |   |   |   |   |   |   |   |   |   |   |   |   |   |
|------------------------------|---|---|---|---|---|---|---|---|---|---|---|---|---|---|---|---|---|---|---|
| Paludibacter_OTU#1044        | 0 | 0 | 0 | 0 | 0 | 0 | 0 | 0 | 0 | 0 | 0 | 0 | 0 | 0 | 0 | 0 | 3 | 0 | 0 |
| Anaerophaga_OTU#1045         | 0 | 0 | 0 | 0 | 0 | 0 | 0 | 0 | 0 | 0 | 0 | 0 | 0 | 0 | 0 | 0 | 1 | 0 | 0 |
| Syntrophococcus_OTU#1046     | 0 | 0 | 0 | 0 | 0 | 0 | 0 | 0 | 0 | 0 | 0 | 0 | 0 | 0 | 0 | 0 | 1 | 0 | 0 |
| Paludibacter_OTU#1047        | 0 | 0 | 0 | 0 | 0 | 0 | 0 | 0 | 0 | 0 | 0 | 0 | 0 | 0 | 0 | 0 | 1 | 0 | 0 |
| Paludibacter_OTU#1048        | 0 | 0 | 0 | 0 | 0 | 0 | 0 | 0 | 0 | 0 | 0 | 0 | 0 | 0 | 0 | 0 | 1 | 0 | 0 |
| Anaerophaga_OTU#1049         | 0 | 0 | 0 | 0 | 0 | 0 | 0 | 0 | 0 | 0 | 0 | 0 | 0 | 0 | 0 | 0 | 1 | 0 | 0 |
| Mucispirillum_OTU#1050       | 0 | 0 | 0 | 0 | 0 | 0 | 0 | 0 | 0 | 0 | 0 | 0 | 0 | 0 | 0 | 0 | 1 | 0 | 0 |
| Helicobacter_OTU#1051        | 0 | 0 | 0 | 0 | 0 | 0 | 0 | 0 | 0 | 0 | 0 | 0 | 0 | 0 | 0 | 0 | 1 | 0 | 0 |
| Anaerophaga_OTU#1052         | 0 | 0 | 0 | 0 | 0 | 0 | 0 | 0 | 0 | 0 | 0 | 0 | 0 | 0 | 0 | 0 | 1 | 0 | 0 |
| Paludibacter_OTU#1053        | 0 | 0 | 0 | 0 | 0 | 0 | 0 | 0 | 0 | 0 | 0 | 0 | 0 | 0 | 0 | 0 | 1 | 0 | 0 |
| Smithella_OTU#1054           | 0 | 0 | 0 | 2 | 0 | 0 | 0 | 0 | 0 | 0 | 0 | 0 | 0 | 0 | 0 | 0 | 0 | 0 | 0 |
| Dorea_OTU#1055               | 0 | 0 | 0 | 1 | 0 | 0 | 0 | 0 | 0 | 0 | 0 | 0 | 0 | 0 | 0 | 0 | 0 | 0 | 0 |
| Allobaculum_OTU#1056         | 0 | 0 | 0 | 1 | 0 | 0 | 0 | 0 | 0 | 0 | 0 | 0 | 0 | 0 | 0 | 0 | 0 | 0 | 0 |
| Anaerovorax_OTU#1057         | 0 | 0 | 0 | 1 | 0 | 0 | 0 | 0 | 0 | 0 | 0 | 0 | 0 | 0 | 0 | 0 | 0 | 0 | 0 |
| Lachnobacterium_OTU#1058     | 0 | 0 | 0 | 1 | 0 | 0 | 0 | 0 | 0 | 0 | 0 | 0 | 0 | 0 | 0 | 0 | 0 | 0 | 0 |
| Paludibacter_OTU#1059        | 0 | 0 | 0 | 1 | 0 | 0 | 0 | 0 | 0 | 0 | 0 | 0 | 0 | 0 | 0 | 0 | 0 | 0 | 0 |
| Lachnobacterium_OTU#1060     | 0 | 0 | 0 | 1 | 0 | 0 | 0 | 0 | 0 | 0 | 0 | 0 | 0 | 0 | 0 | 0 | 0 | 0 | 0 |
| Parasporobacterium_OTU#1061  | 0 | 0 | 0 | 1 | 0 | 0 | 0 | 0 | 0 | 0 | 0 | 0 | 0 | 0 | 0 | 0 | 0 | 0 | 0 |
| Syntrophococcus_OTU#1062     | 0 | 0 | 0 | 1 | 0 | 0 | 0 | 0 | 0 | 0 | 0 | 0 | 0 | 0 | 0 | 0 | 0 | 0 | 0 |
| Allobaculum_OTU#1063         | 0 | 0 | 0 | 1 | 0 | 0 | 0 | 0 | 0 | 0 | 0 | 0 | 0 | 0 | 0 | 0 | 0 | 0 | 0 |
| Lachnobacterium_OTU#1064     | 0 | 0 | 0 | 2 | 0 | 0 | 0 | 0 | 0 | 0 | 0 | 0 | 0 | 0 | 0 | 0 | 0 | 0 | 0 |
| Parasutterella_OTU#1065      | 0 | 0 | 0 | 1 | 0 | 0 | 0 | 0 | 0 | 0 | 0 | 0 | 0 | 0 | 0 | 0 | 0 | 0 | 0 |
| Paludibacter_OTU#1066        | 0 | 0 | 0 | 1 | 0 | 0 | 0 | 0 | 0 | 0 | 0 | 0 | 0 | 0 | 0 | 0 | 0 | 0 | 0 |
| Marvinbryantia_OTU#1067      | 0 | 0 | 0 | 1 | 0 | 0 | 0 | 0 | 0 | 0 | 0 | 0 | 0 | 0 | 0 | 0 | 0 | 0 | 0 |
| Limibacter_OTU#1068          | 0 | 0 | 0 | 1 | 0 | 0 | 0 | 0 | 0 | 0 | 0 | 0 | 0 | 0 | 0 | 0 | 0 | 0 | 0 |
| Acetanaerobacterium_OTU#1069 | 0 | 0 | 0 | 3 | 0 | 0 | 0 | 0 | 0 | 0 | 0 | 0 | 0 | 0 | 0 | 0 | 0 | 0 | 0 |
| Allobaculum_OTU#1070         | 0 | 0 | 0 | 1 | 0 | 0 | 0 | 0 | 0 | 0 | 0 | 0 | 0 | 0 | 0 | 0 | 0 | 0 | 0 |
| Anaerophaga_OTU#1071         | 0 | 0 | 0 | 1 | 0 | 0 | 0 | 0 | 0 | 0 | 0 | 0 | 0 | 0 | 0 | 0 | 0 | 0 | 0 |
| Desulfurispora_OTU#1072      | 0 | 0 | 0 | 1 | 0 | 0 | 0 | 0 | 0 | 0 | 0 | 0 | 0 | 0 | 0 | 0 | 0 | 0 | 0 |
| Allobaculum_OTU#1073         | 0 | 0 | 0 | 1 | 0 | 0 | 0 | 0 | 0 | 0 | 0 | 0 | 0 | 0 | 0 | 0 | 0 | 0 | 0 |
| Sporobacterium_OTU#1074      | 0 | 0 | 0 | 1 | 0 | 0 | 0 | 0 | 0 | 0 | 0 | 0 | 0 | 0 | 0 | 0 | 0 | 0 | 0 |
| Oscillibacter_OTU#1075       | 0 | 0 | 0 | 1 | 0 | 0 | 0 | 0 | 0 | 0 | 0 | 0 | 0 | 0 | 0 | 0 | 0 | 0 | 0 |
| Allobaculum_OTU#1076         | 0 | 0 | 0 | 2 | 0 | 0 | 0 | 0 | 0 | 0 | 0 | 0 | 0 | 0 | 0 | 0 | 0 | 0 | 0 |

Supplementary Table 5

|                                     |   |   |   |   |   |   |   |   |   |   |   |   |   |   |   |   |   |   |
|-------------------------------------|---|---|---|---|---|---|---|---|---|---|---|---|---|---|---|---|---|---|
| Limibacter_OTU#1077                 | 0 | 0 | 0 | 1 | 0 | 0 | 0 | 0 | 0 | 0 | 0 | 0 | 0 | 0 | 0 | 0 | 0 | 0 |
| Allobaculum_OTU#1078                | 0 | 0 | 0 | 1 | 0 | 0 | 0 | 0 | 0 | 0 | 0 | 0 | 0 | 0 | 0 | 0 | 0 | 0 |
| Syntrophococcus_OTU#1079            | 0 | 0 | 0 | 1 | 0 | 0 | 0 | 0 | 0 | 0 | 0 | 0 | 0 | 0 | 0 | 0 | 0 | 0 |
| Sporobacterium_OTU#1080             | 0 | 0 | 0 | 1 | 0 | 0 | 0 | 0 | 0 | 0 | 0 | 0 | 0 | 0 | 0 | 0 | 0 | 0 |
| Barnesiella_OTU#1081                | 0 | 0 | 0 | 1 | 0 | 0 | 0 | 0 | 0 | 0 | 0 | 0 | 0 | 0 | 0 | 0 | 0 | 0 |
| Paludibacter_OTU#1082               | 0 | 0 | 0 | 1 | 0 | 0 | 0 | 0 | 0 | 0 | 0 | 0 | 0 | 0 | 0 | 0 | 0 | 0 |
| Paludibacter_OTU#1083               | 0 | 0 | 0 | 1 | 0 | 0 | 0 | 0 | 0 | 0 | 0 | 0 | 0 | 0 | 0 | 0 | 0 | 0 |
| Allobaculum_OTU#1084                | 0 | 0 | 0 | 1 | 0 | 0 | 0 | 0 | 0 | 0 | 0 | 0 | 0 | 0 | 0 | 0 | 0 | 0 |
| Butyricicoccus_OTU#1085             | 0 | 0 | 0 | 1 | 0 | 0 | 0 | 0 | 0 | 0 | 0 | 0 | 0 | 0 | 0 | 0 | 0 | 0 |
| Allobaculum_OTU#1086                | 0 | 0 | 0 | 1 | 0 | 0 | 0 | 0 | 0 | 0 | 0 | 0 | 0 | 0 | 0 | 0 | 0 | 0 |
| Acetitomaculum_OTU#1087             | 0 | 0 | 0 | 1 | 0 | 0 | 0 | 0 | 0 | 0 | 0 | 0 | 0 | 0 | 0 | 0 | 0 | 0 |
| Robinsoniella_OTU#1088              | 0 | 0 | 0 | 3 | 0 | 0 | 0 | 0 | 0 | 0 | 0 | 0 | 0 | 0 | 0 | 0 | 0 | 0 |
| Anaerophaga_OTU#1089                | 0 | 0 | 0 | 1 | 0 | 0 | 0 | 0 | 0 | 0 | 0 | 0 | 0 | 0 | 0 | 0 | 0 | 0 |
| Thiorhodospira_OTU#1090             | 0 | 0 | 0 | 1 | 0 | 0 | 0 | 0 | 0 | 0 | 0 | 0 | 0 | 0 | 0 | 0 | 0 | 0 |
| Anaerophaga_OTU#1091                | 0 | 0 | 0 | 1 | 0 | 0 | 0 | 0 | 0 | 0 | 0 | 0 | 0 | 0 | 0 | 0 | 0 | 0 |
| Allobaculum_OTU#1092                | 0 | 0 | 0 | 1 | 0 | 0 | 0 | 0 | 0 | 0 | 0 | 0 | 0 | 0 | 0 | 0 | 0 | 0 |
| Butyricicoccus_OTU#1093             | 0 | 0 | 0 | 1 | 0 | 0 | 0 | 0 | 0 | 0 | 0 | 0 | 0 | 0 | 0 | 0 | 0 | 0 |
| Syntrophococcus_OTU#1094            | 0 | 0 | 0 | 1 | 0 | 0 | 0 | 0 | 0 | 0 | 0 | 0 | 0 | 0 | 0 | 0 | 0 | 0 |
| Parasporobacterium_OTU#1095         | 0 | 0 | 0 | 1 | 0 | 0 | 0 | 0 | 0 | 0 | 0 | 0 | 0 | 0 | 0 | 0 | 0 | 0 |
| Rikenella_OTU#1096                  | 0 | 0 | 0 | 1 | 0 | 0 | 0 | 0 | 0 | 0 | 0 | 0 | 0 | 0 | 0 | 0 | 0 | 0 |
| Lachnobacterium_OTU#1097            | 0 | 0 | 0 | 1 | 0 | 0 | 0 | 0 | 0 | 0 | 0 | 0 | 0 | 0 | 0 | 0 | 0 | 0 |
| Marvinbryantia_OTU#1098             | 0 | 0 | 0 | 1 | 0 | 0 | 0 | 0 | 0 | 0 | 0 | 0 | 0 | 0 | 0 | 0 | 0 | 0 |
| Limibacter_OTU#1099                 | 0 | 0 | 0 | 1 | 0 | 0 | 0 | 0 | 0 | 0 | 0 | 0 | 0 | 0 | 0 | 0 | 0 | 0 |
| Rikenella_OTU#1100                  | 0 | 0 | 0 | 1 | 0 | 0 | 0 | 0 | 0 | 0 | 0 | 0 | 0 | 0 | 0 | 0 | 0 | 0 |
| Paludibacter_OTU#1101               | 0 | 0 | 0 | 1 | 0 | 0 | 0 | 0 | 0 | 0 | 0 | 0 | 0 | 0 | 0 | 0 | 0 | 0 |
| Lachnobacterium_OTU#1102            | 0 | 0 | 0 | 1 | 0 | 0 | 0 | 0 | 0 | 0 | 0 | 0 | 0 | 0 | 0 | 0 | 0 | 0 |
| Paraprevotella_OTU#1103             | 0 | 0 | 0 | 1 | 0 | 0 | 0 | 0 | 0 | 0 | 0 | 0 | 0 | 0 | 0 | 0 | 0 | 0 |
| Allobaculum_OTU#1104                | 0 | 0 | 0 | 1 | 0 | 0 | 0 | 0 | 0 | 0 | 0 | 0 | 0 | 0 | 0 | 0 | 0 | 0 |
| Limibacter_OTU#1105                 | 0 | 0 | 0 | 1 | 0 | 0 | 0 | 0 | 0 | 0 | 0 | 0 | 0 | 0 | 0 | 0 | 0 | 0 |
| Robinsoniella_OTU#1106              | 0 | 0 | 0 | 1 | 0 | 0 | 0 | 0 | 0 | 0 | 0 | 0 | 0 | 0 | 0 | 0 | 0 | 0 |
| unclassified Bacteroidales_OTU#1107 | 0 | 0 | 0 | 1 | 0 | 0 | 0 | 1 | 0 | 0 | 0 | 0 | 0 | 0 | 0 | 0 | 0 | 0 |
| Parasporobacterium_OTU#1108         | 0 | 0 | 0 | 1 | 0 | 0 | 0 | 0 | 0 | 0 | 0 | 0 | 0 | 0 | 0 | 0 | 0 | 0 |
| Sharpea_OTU#1109                    | 0 | 0 | 0 | 1 | 0 | 0 | 0 | 0 | 0 | 0 | 0 | 0 | 0 | 0 | 0 | 0 | 0 | 0 |

Supplementary Table 5

|                             |   |   |   |   |   |   |   |   |   |   |   |   |   |   |   |   |   |   |
|-----------------------------|---|---|---|---|---|---|---|---|---|---|---|---|---|---|---|---|---|---|
| Limibacter_OTU#1110         | 0 | 0 | 0 | 1 | 0 | 0 | 0 | 0 | 0 | 0 | 0 | 0 | 0 | 0 | 0 | 0 | 0 | 0 |
| Limibacter_OTU#1111         | 0 | 0 | 0 | 1 | 0 | 0 | 0 | 0 | 0 | 0 | 0 | 0 | 0 | 0 | 0 | 0 | 0 | 0 |
| Dorea_OTU#1112              | 0 | 0 | 0 | 1 | 0 | 0 | 0 | 0 | 0 | 0 | 0 | 0 | 0 | 0 | 0 | 0 | 0 | 0 |
| Oscillibacter_OTU#1113      | 0 | 0 | 0 | 1 | 0 | 0 | 0 | 0 | 0 | 0 | 0 | 0 | 0 | 0 | 0 | 0 | 0 | 0 |
| Limibacter_OTU#1114         | 0 | 0 | 0 | 1 | 0 | 0 | 0 | 0 | 0 | 0 | 0 | 0 | 0 | 0 | 0 | 0 | 0 | 0 |
| Paludibacter_OTU#1115       | 0 | 0 | 0 | 1 | 0 | 0 | 0 | 0 | 0 | 0 | 0 | 0 | 0 | 0 | 0 | 0 | 0 | 0 |
| Robinsoniella_OTU#1116      | 0 | 0 | 0 | 1 | 0 | 0 | 0 | 0 | 0 | 0 | 0 | 0 | 0 | 0 | 0 | 0 | 0 | 0 |
| Syntrophococcus_OTU#1117    | 0 | 0 | 0 | 1 | 0 | 0 | 0 | 0 | 0 | 0 | 0 | 0 | 0 | 0 | 0 | 0 | 0 | 0 |
| Aquiflexum_OTU#1118         | 0 | 0 | 0 | 1 | 0 | 0 | 0 | 0 | 0 | 0 | 0 | 0 | 0 | 0 | 0 | 0 | 0 | 0 |
| Paludibacter_OTU#1119       | 0 | 0 | 0 | 1 | 0 | 0 | 0 | 0 | 0 | 0 | 0 | 0 | 0 | 0 | 0 | 0 | 0 | 0 |
| Paludibacter_OTU#1120       | 0 | 0 | 0 | 1 | 0 | 0 | 0 | 0 | 0 | 0 | 0 | 0 | 0 | 0 | 0 | 0 | 0 | 0 |
| Sporobacterium_OTU#1121     | 0 | 0 | 0 | 1 | 0 | 0 | 0 | 0 | 0 | 0 | 0 | 0 | 0 | 0 | 0 | 0 | 0 | 0 |
| Paludibacter_OTU#1122       | 0 | 0 | 0 | 1 | 0 | 0 | 0 | 0 | 0 | 0 | 0 | 0 | 0 | 0 | 0 | 0 | 0 | 0 |
| Marvinbryantia_OTU#1123     | 0 | 0 | 0 | 1 | 0 | 0 | 0 | 0 | 0 | 0 | 0 | 0 | 0 | 0 | 0 | 0 | 0 | 0 |
| Allobaculum_OTU#1124        | 0 | 0 | 0 | 1 | 0 | 0 | 0 | 0 | 0 | 0 | 0 | 0 | 0 | 0 | 0 | 0 | 0 | 0 |
| Lachnobacterium_OTU#1125    | 0 | 0 | 0 | 1 | 0 | 0 | 0 | 0 | 0 | 0 | 0 | 0 | 0 | 0 | 0 | 0 | 0 | 0 |
| Anaerotruncus_OTU#1126      | 0 | 0 | 0 | 1 | 0 | 0 | 0 | 0 | 0 | 0 | 1 | 0 | 0 | 0 | 0 | 0 | 0 | 0 |
| Parasporobacterium_OTU#1127 | 0 | 0 | 0 | 1 | 0 | 0 | 0 | 0 | 0 | 0 | 0 | 0 | 0 | 0 | 0 | 0 | 0 | 0 |
| Paludibacter_OTU#1128       | 0 | 0 | 0 | 1 | 0 | 0 | 0 | 0 | 0 | 0 | 0 | 0 | 0 | 0 | 0 | 0 | 0 | 0 |
| Marvinbryantia_OTU#1129     | 0 | 0 | 0 | 1 | 0 | 0 | 0 | 0 | 0 | 0 | 0 | 0 | 0 | 0 | 0 | 0 | 0 | 0 |
| Anaerophaga_OTU#1130        | 0 | 0 | 0 | 0 | 0 | 0 | 0 | 0 | 0 | 0 | 1 | 0 | 0 | 0 | 0 | 0 | 0 | 0 |
| Barnesiella_OTU#1131        | 0 | 0 | 0 | 0 | 0 | 0 | 0 | 0 | 0 | 0 | 1 | 0 | 0 | 0 | 0 | 0 | 0 | 0 |
| Roseburia_OTU#1132          | 0 | 0 | 0 | 0 | 0 | 0 | 0 | 0 | 0 | 0 | 1 | 0 | 0 | 0 | 0 | 0 | 0 | 0 |
| Syntrophococcus_OTU#1133    | 0 | 0 | 0 | 0 | 0 | 0 | 0 | 0 | 0 | 0 | 1 | 0 | 0 | 0 | 0 | 0 | 0 | 0 |
| Limibacter_OTU#1134         | 0 | 0 | 0 | 0 | 0 | 0 | 0 | 0 | 0 | 0 | 1 | 0 | 0 | 0 | 0 | 0 | 0 | 0 |
| Coprococcus_OTU#1135        | 0 | 0 | 0 | 0 | 0 | 0 | 0 | 0 | 0 | 0 | 1 | 0 | 0 | 0 | 0 | 0 | 0 | 0 |
| Anaerophaga_OTU#1136        | 0 | 0 | 0 | 0 | 0 | 0 | 0 | 0 | 0 | 0 | 1 | 0 | 0 | 0 | 0 | 0 | 0 | 0 |
| Robinsoniella_OTU#1137      | 0 | 0 | 0 | 0 | 0 | 0 | 0 | 0 | 0 | 0 | 1 | 0 | 0 | 0 | 0 | 0 | 0 | 0 |
| Oscillibacter_OTU#1138      | 0 | 0 | 0 | 0 | 0 | 0 | 0 | 0 | 0 | 0 | 1 | 0 | 0 | 0 | 0 | 0 | 0 | 0 |
| Roseburia_OTU#1139          | 0 | 0 | 0 | 0 | 0 | 0 | 0 | 0 | 0 | 0 | 1 | 0 | 0 | 0 | 0 | 0 | 0 | 0 |
| Blautia_OTU#1140            | 0 | 0 | 0 | 0 | 0 | 0 | 0 | 0 | 0 | 0 | 1 | 0 | 0 | 0 | 0 | 0 | 0 | 0 |
| Limibacter_OTU#1141         | 0 | 0 | 0 | 0 | 0 | 0 | 0 | 0 | 0 | 0 | 1 | 0 | 0 | 0 | 0 | 0 | 0 | 0 |
| Parasporobacterium_OTU#1142 | 0 | 0 | 0 | 0 | 0 | 0 | 0 | 0 | 0 | 0 | 1 | 0 | 0 | 0 | 0 | 0 | 0 | 0 |

Supplementary Table 5

|                          |   |   |   |   |   |   |   |   |   |   |   |   |   |   |   |   |   |   |   |
|--------------------------|---|---|---|---|---|---|---|---|---|---|---|---|---|---|---|---|---|---|---|
| Anaerophaga_OTU#1143     | 0 | 0 | 0 | 0 | 0 | 0 | 0 | 0 | 0 | 0 | 0 | 0 | 1 | 0 | 0 | 0 | 0 | 0 | 0 |
| Dorea_OTU#1144           | 0 | 0 | 0 | 0 | 0 | 0 | 0 | 0 | 0 | 0 | 0 | 0 | 2 | 0 | 0 | 0 | 0 | 0 | 0 |
| Robinsoniella_OTU#1145   | 0 | 0 | 0 | 0 | 0 | 0 | 0 | 0 | 0 | 0 | 0 | 4 | 0 | 0 | 0 | 0 | 0 | 0 | 0 |
| Paludibacter_OTU#1146    | 0 | 0 | 0 | 0 | 0 | 0 | 0 | 0 | 0 | 0 | 0 | 1 | 0 | 0 | 0 | 0 | 0 | 0 | 0 |
| Paludibacter_OTU#1147    | 0 | 0 | 0 | 0 | 0 | 0 | 0 | 0 | 0 | 0 | 0 | 1 | 0 | 0 | 0 | 0 | 0 | 0 | 0 |
| Limibacter_OTU#1148      | 0 | 0 | 0 | 0 | 0 | 0 | 0 | 0 | 0 | 0 | 0 | 1 | 0 | 0 | 0 | 0 | 0 | 0 | 0 |
| Shuttleworthia_OTU#1149  | 0 | 0 | 0 | 0 | 0 | 0 | 0 | 0 | 0 | 0 | 0 | 1 | 0 | 0 | 0 | 0 | 0 | 0 | 0 |
| Anaerophaga_OTU#1150     | 0 | 0 | 0 | 0 | 0 | 0 | 0 | 0 | 0 | 0 | 0 | 1 | 0 | 0 | 0 | 0 | 0 | 0 | 0 |
| Streptococcus_OTU#1151   | 0 | 0 | 0 | 0 | 0 | 0 | 0 | 0 | 0 | 0 | 0 | 1 | 0 | 0 | 0 | 0 | 0 | 0 | 0 |
| Paludibacter_OTU#1152    | 0 | 0 | 0 | 0 | 0 | 0 | 0 | 0 | 0 | 0 | 0 | 1 | 0 | 0 | 0 | 0 | 0 | 0 | 0 |
| Paludibacter_OTU#1153    | 0 | 0 | 0 | 0 | 0 | 0 | 0 | 0 | 0 | 0 | 0 | 1 | 0 | 0 | 0 | 0 | 0 | 0 | 0 |
| Maritalea_OTU#1154       | 0 | 0 | 0 | 0 | 0 | 0 | 0 | 0 | 0 | 0 | 0 | 1 | 0 | 0 | 0 | 0 | 0 | 0 | 0 |
| Oscillibacter_OTU#1155   | 0 | 0 | 0 | 0 | 0 | 0 | 0 | 0 | 0 | 0 | 0 | 1 | 0 | 0 | 0 | 0 | 0 | 0 | 0 |
| Allobaculum_OTU#1156     | 0 | 0 | 0 | 0 | 0 | 0 | 0 | 0 | 0 | 0 | 0 | 1 | 0 | 0 | 0 | 0 | 0 | 0 | 0 |
| Barnesiella_OTU#1157     | 0 | 0 | 0 | 0 | 0 | 0 | 0 | 0 | 0 | 0 | 0 | 1 | 0 | 0 | 0 | 0 | 0 | 0 | 0 |
| Limibacter_OTU#1158      | 0 | 0 | 0 | 0 | 0 | 0 | 0 | 0 | 0 | 0 | 0 | 1 | 0 | 0 | 0 | 0 | 0 | 0 | 0 |
| Marvinbryantia_OTU#1159  | 0 | 0 | 0 | 0 | 0 | 0 | 0 | 0 | 0 | 0 | 0 | 1 | 0 | 0 | 0 | 0 | 0 | 0 | 0 |
| Barnesiella_OTU#1160     | 0 | 0 | 0 | 0 | 0 | 0 | 0 | 0 | 0 | 0 | 0 | 1 | 0 | 0 | 0 | 0 | 0 | 0 | 0 |
| Staphylococcus_OTU#1161  | 0 | 0 | 0 | 0 | 0 | 0 | 0 | 0 | 0 | 0 | 0 | 1 | 0 | 0 | 0 | 0 | 0 | 0 | 0 |
| Pseudozobellia_OTU#1162  | 0 | 0 | 0 | 0 | 0 | 0 | 0 | 0 | 0 | 0 | 0 | 1 | 0 | 0 | 0 | 0 | 0 | 0 | 0 |
| Dorea_OTU#1163           | 0 | 0 | 0 | 0 | 0 | 0 | 0 | 0 | 0 | 0 | 0 | 1 | 0 | 0 | 0 | 0 | 0 | 0 | 0 |
| Barnesiella_OTU#1164     | 0 | 0 | 0 | 0 | 0 | 0 | 0 | 0 | 0 | 0 | 0 | 1 | 0 | 0 | 0 | 0 | 0 | 0 | 0 |
| Robinsoniella_OTU#1165   | 0 | 0 | 0 | 0 | 0 | 0 | 0 | 0 | 0 | 0 | 0 | 1 | 1 | 0 | 0 | 0 | 0 | 0 | 0 |
| Paludibacter_OTU#1166    | 0 | 0 | 0 | 0 | 0 | 0 | 0 | 0 | 0 | 0 | 0 | 1 | 0 | 0 | 0 | 0 | 0 | 0 | 0 |
| Robinsoniella_OTU#1167   | 0 | 0 | 0 | 0 | 0 | 0 | 0 | 0 | 0 | 0 | 0 | 1 | 0 | 0 | 0 | 0 | 0 | 0 | 0 |
| Paludibacter_OTU#1168    | 0 | 0 | 0 | 0 | 0 | 0 | 0 | 0 | 0 | 0 | 0 | 1 | 1 | 0 | 0 | 0 | 0 | 0 | 0 |
| Lachnobacterium_OTU#1169 | 0 | 0 | 0 | 0 | 0 | 0 | 0 | 0 | 0 | 0 | 0 | 1 | 0 | 0 | 0 | 0 | 0 | 0 | 0 |
| Syntrophococcus_OTU#1170 | 0 | 0 | 0 | 0 | 0 | 0 | 0 | 0 | 0 | 0 | 0 | 1 | 0 | 0 | 0 | 0 | 0 | 0 | 0 |
| Anaerophaga_OTU#1171     | 0 | 0 | 0 | 0 | 0 | 0 | 0 | 0 | 0 | 0 | 0 | 1 | 0 | 0 | 0 | 0 | 0 | 0 | 0 |
| Syntrophococcus_OTU#1172 | 0 | 0 | 0 | 0 | 0 | 0 | 0 | 0 | 0 | 0 | 0 | 1 | 0 | 0 | 0 | 0 | 0 | 0 | 0 |
| Globicatella_OTU#1173    | 0 | 0 | 0 | 0 | 0 | 0 | 0 | 0 | 0 | 0 | 0 | 1 | 0 | 0 | 0 | 0 | 0 | 0 | 0 |
| Limibacter_OTU#1174      | 0 | 0 | 0 | 0 | 0 | 0 | 0 | 0 | 0 | 0 | 0 | 1 | 0 | 0 | 0 | 0 | 0 | 0 | 0 |
| Limibacter_OTU#1175      | 0 | 0 | 0 | 0 | 0 | 0 | 0 | 0 | 0 | 0 | 0 | 1 | 0 | 0 | 0 | 0 | 0 | 0 | 0 |

Supplementary Table 5

|                          |   |   |   |   |   |   |   |   |   |   |   |   |   |   |   |   |   |   |
|--------------------------|---|---|---|---|---|---|---|---|---|---|---|---|---|---|---|---|---|---|
| Paludibacter_OTU#1176    | 0 | 0 | 0 | 0 | 0 | 0 | 0 | 0 | 0 | 0 | 0 | 2 | 0 | 0 | 0 | 0 | 0 | 0 |
| Blautia_OTU#1177         | 0 | 0 | 0 | 0 | 0 | 0 | 0 | 0 | 0 | 0 | 0 | 1 | 0 | 0 | 0 | 0 | 0 | 0 |
| Robinsoniella_OTU#1178   | 0 | 0 | 0 | 0 | 0 | 0 | 0 | 0 | 0 | 0 | 0 | 1 | 0 | 0 | 0 | 0 | 0 | 0 |
| Paludibacter_OTU#1179    | 0 | 0 | 0 | 0 | 0 | 0 | 0 | 0 | 0 | 0 | 0 | 1 | 0 | 0 | 0 | 0 | 0 | 0 |
| Paludibacter_OTU#1180    | 0 | 0 | 0 | 0 | 0 | 0 | 0 | 0 | 0 | 0 | 0 | 1 | 0 | 0 | 0 | 0 | 0 | 0 |
| Barnesiella_OTU#1181     | 0 | 0 | 0 | 0 | 0 | 0 | 0 | 0 | 0 | 0 | 0 | 2 | 1 | 0 | 0 | 0 | 0 | 0 |
| Anaerotruncus_OTU#1182   | 0 | 0 | 0 | 0 | 0 | 0 | 0 | 0 | 0 | 0 | 0 | 1 | 0 | 0 | 0 | 0 | 0 | 0 |
| Paludibacter_OTU#1183    | 0 | 0 | 0 | 0 | 0 | 0 | 0 | 0 | 0 | 0 | 0 | 1 | 0 | 0 | 0 | 0 | 0 | 0 |
| Pseudozobellia_OTU#1184  | 0 | 0 | 0 | 0 | 0 | 0 | 0 | 0 | 0 | 0 | 0 | 1 | 0 | 0 | 0 | 0 | 0 | 0 |
| Roseburia_OTU#1185       | 0 | 0 | 0 | 0 | 0 | 0 | 0 | 0 | 0 | 0 | 0 | 1 | 0 | 0 | 0 | 0 | 0 | 0 |
| Limibacter_OTU#1186      | 0 | 0 | 0 | 0 | 0 | 0 | 0 | 0 | 0 | 0 | 0 | 1 | 0 | 0 | 0 | 0 | 0 | 0 |
| Barnesiella_OTU#1187     | 0 | 0 | 0 | 0 | 0 | 0 | 0 | 0 | 0 | 0 | 0 | 1 | 0 | 0 | 0 | 0 | 0 | 0 |
| Robinsoniella_OTU#1188   | 0 | 0 | 0 | 0 | 0 | 0 | 0 | 0 | 0 | 0 | 0 | 1 | 0 | 0 | 0 | 0 | 0 | 0 |
| Parabacteroides_OTU#1189 | 0 | 0 | 0 | 0 | 0 | 0 | 0 | 0 | 0 | 0 | 0 | 1 | 0 | 0 | 0 | 0 | 0 | 0 |
| Paludibacter_OTU#1190    | 0 | 0 | 0 | 0 | 0 | 0 | 0 | 0 | 0 | 0 | 0 | 1 | 0 | 0 | 0 | 0 | 0 | 0 |
| Paludibacter_OTU#1191    | 0 | 0 | 0 | 0 | 0 | 0 | 0 | 0 | 0 | 0 | 0 | 1 | 0 | 0 | 0 | 0 | 0 | 0 |
| Marvinbryantia_OTU#1192  | 0 | 0 | 0 | 0 | 0 | 0 | 0 | 0 | 0 | 0 | 0 | 1 | 0 | 0 | 0 | 0 | 0 | 0 |
| Robinsoniella_OTU#1193   | 0 | 0 | 0 | 0 | 0 | 0 | 0 | 0 | 0 | 0 | 0 | 1 | 0 | 0 | 0 | 0 | 0 | 0 |
| Barnesiella_OTU#1194     | 0 | 0 | 0 | 0 | 0 | 0 | 0 | 0 | 0 | 0 | 0 | 1 | 0 | 0 | 0 | 0 | 0 | 0 |
| Anaerophaga_OTU#1195     | 0 | 0 | 0 | 0 | 0 | 0 | 0 | 0 | 0 | 0 | 0 | 1 | 0 | 0 | 0 | 0 | 0 | 0 |
| Butyrivibrio_OTU#1196    | 0 | 0 | 0 | 0 | 0 | 0 | 0 | 0 | 0 | 0 | 0 | 1 | 0 | 0 | 0 | 0 | 0 | 0 |
| Parasutterella_OTU#1197  | 0 | 0 | 0 | 0 | 0 | 0 | 0 | 0 | 0 | 0 | 0 | 1 | 0 | 0 | 0 | 0 | 0 | 0 |
| Barnesiella_OTU#1198     | 0 | 0 | 0 | 0 | 0 | 0 | 0 | 0 | 0 | 0 | 0 | 1 | 0 | 0 | 0 | 0 | 0 | 0 |
| Lactobacillus_OTU#1199   | 0 | 0 | 0 | 0 | 0 | 0 | 0 | 0 | 0 | 0 | 0 | 1 | 0 | 0 | 0 | 0 | 0 | 0 |
| Turicibacter_OTU#1200    | 0 | 0 | 0 | 0 | 0 | 0 | 0 | 0 | 0 | 0 | 0 | 1 | 0 | 0 | 0 | 0 | 0 | 0 |
| Anaerotruncus_OTU#1201   | 0 | 0 | 0 | 0 | 0 | 0 | 0 | 0 | 0 | 0 | 0 | 1 | 0 | 0 | 0 | 0 | 0 | 0 |
| Anaerophaga_OTU#1202     | 0 | 0 | 0 | 0 | 0 | 0 | 0 | 0 | 0 | 0 | 0 | 1 | 0 | 0 | 0 | 0 | 0 | 0 |
| Paludibacter_OTU#1203    | 0 | 0 | 0 | 0 | 0 | 0 | 0 | 0 | 0 | 0 | 0 | 1 | 0 | 0 | 0 | 0 | 0 | 0 |
| Sharpea_OTU#1204         | 0 | 0 | 0 | 0 | 0 | 0 | 0 | 0 | 0 | 0 | 0 | 1 | 0 | 0 | 0 | 0 | 0 | 0 |
| Paludibacter_OTU#1205    | 0 | 0 | 0 | 0 | 0 | 0 | 0 | 0 | 0 | 1 | 0 | 1 | 1 | 0 | 0 | 0 | 0 | 0 |
| Robinsoniella_OTU#1206   | 0 | 0 | 0 | 0 | 0 | 0 | 0 | 0 | 0 | 0 | 0 | 1 | 0 | 0 | 0 | 0 | 0 | 0 |
| Rikenella_OTU#1207       | 0 | 0 | 0 | 0 | 0 | 0 | 0 | 0 | 0 | 0 | 0 | 1 | 0 | 0 | 0 | 0 | 0 | 0 |
| Terasakiella_OTU#1208    | 0 | 0 | 0 | 0 | 0 | 0 | 0 | 0 | 0 | 0 | 0 | 1 | 0 | 0 | 0 | 0 | 0 | 0 |

Supplementary Table 5

|                            |   |   |   |   |   |   |   |   |   |   |   |   |   |   |   |   |   |   |
|----------------------------|---|---|---|---|---|---|---|---|---|---|---|---|---|---|---|---|---|---|
| Barnesiella_OTU#1209       | 0 | 0 | 0 | 0 | 0 | 0 | 0 | 0 | 0 | 0 | 0 | 1 | 0 | 0 | 0 | 0 | 0 | 0 |
| Paludibacter_OTU#1210      | 0 | 0 | 0 | 0 | 0 | 0 | 0 | 1 | 0 | 0 | 0 | 1 | 0 | 0 | 0 | 0 | 0 | 0 |
| Robinsoniella_OTU#1211     | 0 | 0 | 0 | 0 | 0 | 0 | 0 | 0 | 0 | 0 | 0 | 1 | 0 | 0 | 0 | 0 | 0 | 0 |
| Marvinbryantia_OTU#1212    | 0 | 0 | 0 | 0 | 0 | 0 | 0 | 0 | 0 | 0 | 0 | 1 | 0 | 0 | 0 | 0 | 0 | 0 |
| Barnesiella_OTU#1213       | 0 | 0 | 0 | 0 | 0 | 0 | 0 | 0 | 0 | 0 | 0 | 1 | 0 | 0 | 0 | 0 | 0 | 0 |
| Limibacter_OTU#1214        | 0 | 0 | 0 | 0 | 0 | 0 | 0 | 0 | 0 | 0 | 0 | 1 | 0 | 0 | 0 | 0 | 0 | 0 |
| Roseburia_OTU#1215         | 0 | 0 | 0 | 0 | 0 | 0 | 0 | 0 | 0 | 0 | 0 | 1 | 0 | 0 | 0 | 0 | 0 | 0 |
| Robinsoniella_OTU#1216     | 0 | 0 | 0 | 0 | 0 | 0 | 0 | 0 | 0 | 0 | 0 | 1 | 0 | 0 | 0 | 0 | 0 | 0 |
| Anaerophaga_OTU#1217       | 0 | 0 | 0 | 0 | 0 | 0 | 0 | 0 | 0 | 0 | 0 | 1 | 0 | 0 | 0 | 0 | 0 | 0 |
| Dorea_OTU#1218             | 0 | 0 | 0 | 0 | 0 | 0 | 0 | 0 | 0 | 0 | 0 | 1 | 0 | 0 | 0 | 0 | 0 | 0 |
| Acinetobacter_OTU#1219     | 0 | 0 | 0 | 0 | 0 | 0 | 0 | 0 | 0 | 0 | 0 | 1 | 0 | 0 | 0 | 0 | 0 | 0 |
| Tannerella_OTU#1220        | 0 | 0 | 0 | 0 | 0 | 0 | 0 | 0 | 0 | 0 | 0 | 1 | 0 | 0 | 0 | 0 | 0 | 0 |
| Helicobacter_OTU#1221      | 0 | 0 | 0 | 0 | 0 | 0 | 0 | 1 | 0 | 0 | 0 | 0 | 0 | 0 | 0 | 0 | 0 | 0 |
| Paludibacter_OTU#1222      | 0 | 0 | 0 | 0 | 0 | 0 | 0 | 1 | 0 | 0 | 0 | 0 | 0 | 0 | 0 | 0 | 0 | 0 |
| Paludibacter_OTU#1223      | 0 | 0 | 0 | 0 | 0 | 0 | 0 | 1 | 0 | 0 | 0 | 0 | 0 | 0 | 0 | 0 | 0 | 0 |
| Anaerophaga_OTU#1224       | 0 | 0 | 0 | 0 | 0 | 0 | 0 | 1 | 0 | 0 | 0 | 0 | 0 | 0 | 0 | 0 | 0 | 0 |
| Limibacter_OTU#1225        | 0 | 0 | 0 | 0 | 0 | 0 | 0 | 1 | 0 | 0 | 0 | 0 | 0 | 0 | 0 | 0 | 0 | 0 |
| Anaerophaga_OTU#1226       | 0 | 0 | 0 | 0 | 0 | 0 | 0 | 1 | 0 | 0 | 0 | 0 | 0 | 0 | 0 | 0 | 0 | 0 |
| Rikenella_OTU#1227         | 0 | 0 | 0 | 0 | 0 | 0 | 0 | 1 | 0 | 0 | 0 | 0 | 0 | 0 | 0 | 0 | 0 | 0 |
| Paludibacter_OTU#1228      | 0 | 0 | 0 | 0 | 0 | 0 | 0 | 1 | 0 | 0 | 0 | 0 | 0 | 0 | 0 | 0 | 0 | 0 |
| Limibacter_OTU#1229        | 0 | 0 | 0 | 0 | 0 | 0 | 0 | 1 | 0 | 0 | 0 | 0 | 1 | 0 | 0 | 0 | 0 | 0 |
| Paludibacter_OTU#1230      | 0 | 0 | 0 | 0 | 0 | 0 | 0 | 1 | 0 | 0 | 0 | 0 | 0 | 0 | 0 | 0 | 0 | 0 |
| Parasutterella_OTU#1231    | 0 | 0 | 0 | 0 | 0 | 0 | 0 | 1 | 0 | 0 | 0 | 0 | 0 | 0 | 0 | 0 | 0 | 0 |
| Paludibacter_OTU#1232      | 0 | 0 | 0 | 0 | 0 | 0 | 0 | 2 | 0 | 0 | 0 | 0 | 0 | 0 | 0 | 0 | 0 | 0 |
| Rikenella_OTU#1233         | 0 | 0 | 0 | 0 | 0 | 0 | 0 | 1 | 0 | 0 | 0 | 0 | 0 | 0 | 0 | 0 | 0 | 0 |
| Tannerella_OTU#1234        | 0 | 0 | 0 | 0 | 0 | 0 | 0 | 1 | 0 | 0 | 0 | 0 | 0 | 0 | 0 | 0 | 0 | 0 |
| Lachnobacterium_OTU#1235   | 0 | 0 | 0 | 0 | 0 | 0 | 0 | 0 | 0 | 0 | 0 | 0 | 0 | 0 | 0 | 0 | 1 | 0 |
| Corynebacterium_OTU#1236   | 0 | 0 | 0 | 0 | 0 | 0 | 0 | 0 | 0 | 0 | 0 | 0 | 0 | 0 | 0 | 0 | 1 | 0 |
| Corynebacterium_OTU#1237   | 0 | 0 | 0 | 0 | 0 | 0 | 0 | 0 | 0 | 0 | 0 | 0 | 0 | 0 | 0 | 0 | 1 | 0 |
| Anaerotruncus_OTU#1238     | 0 | 0 | 0 | 0 | 0 | 0 | 0 | 0 | 0 | 0 | 0 | 0 | 0 | 0 | 0 | 0 | 1 | 0 |
| Butyrivococcus_OTU#1239    | 0 | 0 | 0 | 0 | 0 | 0 | 0 | 0 | 0 | 0 | 0 | 0 | 0 | 0 | 0 | 0 | 1 | 0 |
| Burkholderia_OTU#1240      | 0 | 0 | 0 | 0 | 0 | 0 | 0 | 0 | 0 | 0 | 0 | 0 | 0 | 0 | 0 | 0 | 1 | 0 |
| Propionibacterium_OTU#1241 | 0 | 0 | 0 | 0 | 0 | 0 | 0 | 0 | 0 | 0 | 0 | 0 | 0 | 0 | 0 | 0 | 5 | 0 |

Supplementary Table 5

|                                     |   |   |   |   |   |   |   |   |   |   |   |   |   |   |   |   |   |   |
|-------------------------------------|---|---|---|---|---|---|---|---|---|---|---|---|---|---|---|---|---|---|
| Allobaculum_OTU#1242                | 0 | 0 | 0 | 0 | 0 | 0 | 0 | 0 | 0 | 0 | 0 | 0 | 0 | 0 | 0 | 0 | 2 | 0 |
| Sporacetigenium_OTU#1243            | 0 | 0 | 0 | 0 | 0 | 0 | 0 | 0 | 0 | 0 | 0 | 0 | 0 | 0 | 0 | 0 | 1 | 0 |
| Tumebacillus_OTU#1244               | 0 | 0 | 0 | 0 | 0 | 0 | 0 | 0 | 0 | 0 | 0 | 0 | 0 | 0 | 0 | 0 | 1 | 0 |
| Limibacter_OTU#1245                 | 0 | 0 | 0 | 0 | 0 | 0 | 0 | 0 | 0 | 0 | 0 | 0 | 0 | 0 | 0 | 0 | 1 | 0 |
| Tumebacillus_OTU#1246               | 0 | 0 | 0 | 0 | 0 | 0 | 0 | 0 | 0 | 0 | 0 | 0 | 0 | 0 | 0 | 0 | 1 | 0 |
| Ilumatobacter_OTU#1247              | 0 | 0 | 0 | 0 | 0 | 0 | 0 | 0 | 0 | 0 | 0 | 0 | 0 | 0 | 0 | 0 | 3 | 0 |
| Tumebacillus_OTU#1248               | 0 | 0 | 0 | 0 | 0 | 0 | 0 | 0 | 0 | 0 | 0 | 0 | 0 | 0 | 0 | 0 | 2 | 0 |
| Paludibacter_OTU#1249               | 0 | 0 | 0 | 0 | 0 | 0 | 0 | 0 | 0 | 0 | 0 | 0 | 0 | 0 | 0 | 0 | 1 | 0 |
| Anaerotruncus_OTU#1250              | 0 | 0 | 0 | 0 | 0 | 0 | 0 | 0 | 0 | 0 | 0 | 0 | 0 | 0 | 0 | 0 | 1 | 0 |
| Roseburia_OTU#1251                  | 0 | 0 | 0 | 0 | 0 | 0 | 0 | 0 | 0 | 0 | 0 | 0 | 0 | 0 | 0 | 0 | 1 | 0 |
| Anaerostipes_OTU#1252               | 0 | 0 | 0 | 0 | 0 | 0 | 0 | 0 | 0 | 0 | 0 | 0 | 0 | 0 | 0 | 0 | 1 | 0 |
| Propionibacterium_OTU#1253          | 0 | 0 | 0 | 0 | 0 | 0 | 0 | 0 | 0 | 0 | 0 | 0 | 0 | 0 | 0 | 0 | 1 | 0 |
| Acinetobacter_OTU#1254              | 0 | 0 | 0 | 0 | 0 | 0 | 0 | 0 | 0 | 0 | 0 | 0 | 0 | 0 | 0 | 0 | 1 | 0 |
| Roseburia_OTU#1255                  | 0 | 0 | 0 | 0 | 0 | 0 | 0 | 0 | 0 | 0 | 0 | 0 | 0 | 0 | 0 | 0 | 1 | 0 |
| Comamonas_OTU#1256                  | 0 | 0 | 0 | 0 | 0 | 0 | 0 | 0 | 0 | 0 | 0 | 0 | 0 | 0 | 0 | 0 | 1 | 0 |
| Anaerophaga_OTU#1257                | 0 | 0 | 0 | 0 | 0 | 0 | 0 | 0 | 0 | 0 | 0 | 0 | 1 | 0 | 0 | 0 | 0 | 0 |
| Anaerophaga_OTU#1258                | 0 | 0 | 0 | 0 | 0 | 0 | 0 | 0 | 0 | 0 | 0 | 0 | 1 | 0 | 0 | 0 | 0 | 0 |
| unclassified Bacteroidales_OTU#1259 | 0 | 0 | 0 | 0 | 0 | 0 | 0 | 0 | 0 | 0 | 0 | 0 | 2 | 0 | 0 | 0 | 0 | 0 |
| Marvinbryantia_OTU#1260             | 0 | 0 | 0 | 0 | 0 | 0 | 0 | 0 | 0 | 0 | 0 | 0 | 1 | 0 | 0 | 0 | 0 | 0 |
| Barnesiella_OTU#1261                | 0 | 0 | 0 | 0 | 0 | 0 | 0 | 0 | 0 | 0 | 0 | 0 | 1 | 0 | 0 | 0 | 0 | 0 |
| Marvinbryantia_OTU#1262             | 0 | 0 | 0 | 0 | 0 | 0 | 0 | 0 | 0 | 0 | 0 | 0 | 1 | 0 | 0 | 0 | 0 | 0 |
| Turcibacter_OTU#1263                | 0 | 0 | 0 | 0 | 0 | 0 | 0 | 0 | 0 | 0 | 0 | 0 | 1 | 0 | 0 | 0 | 0 | 0 |
| Robinsoniella_OTU#1264              | 0 | 0 | 0 | 0 | 0 | 0 | 0 | 0 | 0 | 0 | 0 | 0 | 1 | 0 | 0 | 0 | 0 | 0 |
| Barnesiella_OTU#1265                | 0 | 0 | 0 | 0 | 0 | 0 | 0 | 0 | 0 | 0 | 0 | 0 | 1 | 0 | 0 | 0 | 0 | 0 |
| Anaerophaga_OTU#1266                | 0 | 0 | 0 | 0 | 0 | 0 | 0 | 0 | 0 | 0 | 0 | 0 | 1 | 0 | 0 | 0 | 0 | 0 |
| Sporobacter_OTU#1267                | 0 | 0 | 0 | 0 | 0 | 0 | 0 | 0 | 1 | 0 | 0 | 0 | 2 | 0 | 0 | 0 | 0 | 0 |
| Paludibacter_OTU#1268               | 0 | 0 | 0 | 0 | 0 | 0 | 0 | 0 | 0 | 0 | 0 | 0 | 1 | 0 | 0 | 0 | 0 | 0 |
| Paludibacter_OTU#1269               | 0 | 0 | 0 | 0 | 0 | 0 | 0 | 0 | 0 | 0 | 0 | 0 | 1 | 0 | 0 | 0 | 0 | 0 |
| Anaerophaga_OTU#1270                | 0 | 0 | 0 | 0 | 0 | 0 | 0 | 0 | 0 | 0 | 0 | 0 | 2 | 0 | 0 | 0 | 0 | 0 |
| Lactobacillus_OTU#1271              | 0 | 0 | 0 | 0 | 0 | 0 | 0 | 0 | 0 | 0 | 0 | 0 | 1 | 0 | 0 | 0 | 0 | 0 |
| Paludibacter_OTU#1272               | 0 | 0 | 0 | 0 | 0 | 0 | 0 | 0 | 0 | 0 | 0 | 0 | 2 | 0 | 0 | 0 | 0 | 0 |
| Robinsoniella_OTU#1273              | 0 | 0 | 0 | 0 | 0 | 0 | 0 | 0 | 0 | 0 | 0 | 0 | 1 | 0 | 0 | 0 | 0 | 0 |
| Barnesiella_OTU#1274                | 0 | 0 | 0 | 0 | 0 | 0 | 0 | 0 | 0 | 0 | 0 | 0 | 1 | 0 | 0 | 0 | 0 | 0 |

Supplementary Table 5



|                          |   |   |   |   |   |   |   |   |   |   |   |   |   |   |   |   |   |   |
|--------------------------|---|---|---|---|---|---|---|---|---|---|---|---|---|---|---|---|---|---|
| Paludibacter_OTU#1275    | 0 | 0 | 0 | 0 | 0 | 0 | 0 | 0 | 0 | 0 | 0 | 0 | 0 | 1 | 0 | 0 | 0 | 0 |
| Barnesiella_OTU#1276     | 0 | 0 | 0 | 0 | 0 | 0 | 0 | 0 | 0 | 0 | 0 | 0 | 0 | 1 | 0 | 0 | 0 | 0 |
| Barnesiella_OTU#1277     | 0 | 0 | 0 | 0 | 0 | 0 | 0 | 0 | 0 | 0 | 0 | 0 | 0 | 1 | 0 | 0 | 0 | 0 |
| Barnesiella_OTU#1278     | 0 | 0 | 0 | 0 | 0 | 0 | 0 | 0 | 0 | 0 | 0 | 0 | 0 | 1 | 0 | 0 | 0 | 0 |
| Barnesiella_OTU#1279     | 0 | 0 | 0 | 0 | 0 | 0 | 0 | 0 | 0 | 0 | 0 | 0 | 0 | 1 | 0 | 0 | 0 | 0 |
| Robinsoniella_OTU#1280   | 0 | 0 | 0 | 0 | 0 | 0 | 0 | 0 | 0 | 0 | 0 | 0 | 0 | 1 | 0 | 0 | 0 | 0 |
| Paludibacter_OTU#1281    | 0 | 0 | 0 | 0 | 0 | 0 | 0 | 0 | 0 | 0 | 0 | 0 | 0 | 1 | 0 | 0 | 0 | 0 |
| Paludibacter_OTU#1282    | 0 | 0 | 0 | 0 | 0 | 0 | 0 | 0 | 0 | 0 | 0 | 0 | 0 | 1 | 0 | 0 | 0 | 0 |
| Paludibacter_OTU#1283    | 0 | 0 | 0 | 0 | 0 | 0 | 0 | 0 | 0 | 0 | 0 | 0 | 0 | 1 | 0 | 0 | 0 | 0 |
| Dorea_OTU#1284           | 0 | 0 | 0 | 0 | 0 | 0 | 0 | 0 | 0 | 0 | 0 | 0 | 0 | 1 | 0 | 0 | 0 | 0 |
| Coprococcus_OTU#1285     | 0 | 0 | 0 | 0 | 0 | 0 | 0 | 0 | 0 | 0 | 0 | 0 | 0 | 1 | 0 | 0 | 0 | 0 |
| Oscillibacter_OTU#1286   | 0 | 0 | 0 | 0 | 0 | 0 | 0 | 0 | 0 | 0 | 0 | 0 | 0 | 1 | 0 | 0 | 0 | 0 |
| Robinsoniella_OTU#1287   | 0 | 0 | 0 | 0 | 0 | 0 | 0 | 0 | 0 | 0 | 0 | 0 | 0 | 2 | 0 | 0 | 0 | 0 |
| Paludibacter_OTU#1288    | 0 | 0 | 0 | 0 | 0 | 0 | 0 | 0 | 0 | 0 | 0 | 0 | 0 | 1 | 0 | 0 | 0 | 0 |
| Paludibacter_OTU#1289    | 0 | 0 | 0 | 0 | 0 | 0 | 0 | 0 | 0 | 0 | 0 | 0 | 0 | 1 | 0 | 0 | 0 | 0 |
| Anaerophaga_OTU#1290     | 0 | 0 | 0 | 0 | 0 | 0 | 0 | 0 | 0 | 0 | 0 | 0 | 0 | 1 | 0 | 0 | 0 | 0 |
| Paludibacter_OTU#1291    | 0 | 0 | 0 | 0 | 0 | 0 | 0 | 0 | 0 | 0 | 0 | 0 | 0 | 1 | 0 | 0 | 0 | 0 |
| Anaerophaga_OTU#1292     | 0 | 0 | 0 | 0 | 0 | 0 | 0 | 0 | 0 | 0 | 0 | 0 | 0 | 1 | 0 | 0 | 0 | 0 |
| Paludibacter_OTU#1293    | 0 | 0 | 0 | 0 | 0 | 0 | 0 | 0 | 0 | 0 | 0 | 0 | 0 | 1 | 0 | 0 | 0 | 0 |
| Barnesiella_OTU#1294     | 0 | 0 | 0 | 0 | 0 | 0 | 0 | 0 | 0 | 0 | 0 | 0 | 0 | 1 | 0 | 0 | 0 | 0 |
| Lachnobacterium_OTU#1295 | 0 | 0 | 0 | 0 | 0 | 0 | 0 | 0 | 0 | 0 | 0 | 0 | 0 | 1 | 0 | 0 | 0 | 0 |
| Paludibacter_OTU#1296    | 0 | 0 | 0 | 0 | 0 | 0 | 0 | 0 | 0 | 0 | 0 | 0 | 0 | 1 | 0 | 0 | 0 | 0 |
| Acetitomaculum_OTU#1297  | 0 | 0 | 0 | 0 | 0 | 0 | 0 | 0 | 0 | 0 | 0 | 0 | 0 | 1 | 0 | 0 | 0 | 0 |
| Rikenella_OTU#1298       | 0 | 0 | 0 | 0 | 0 | 0 | 0 | 0 | 0 | 0 | 0 | 0 | 0 | 1 | 0 | 0 | 0 | 0 |
| Limibacter_OTU#1299      | 0 | 0 | 0 | 0 | 0 | 0 | 0 | 0 | 0 | 0 | 0 | 0 | 0 | 1 | 0 | 0 | 0 | 0 |
| Paludibacter_OTU#1300    | 0 | 0 | 0 | 0 | 0 | 0 | 0 | 0 | 0 | 0 | 0 | 0 | 0 | 1 | 0 | 0 | 0 | 0 |
| Limibacter_OTU#1301      | 0 | 0 | 0 | 0 | 0 | 0 | 0 | 0 | 0 | 0 | 0 | 0 | 0 | 1 | 0 | 0 | 0 | 0 |
| Robinsoniella_OTU#1302   | 0 | 0 | 0 | 0 | 0 | 0 | 0 | 0 | 0 | 0 | 0 | 0 | 0 | 1 | 0 | 0 | 0 | 0 |
| Paludibacter_OTU#1303    | 0 | 0 | 0 | 0 | 0 | 0 | 0 | 0 | 0 | 0 | 0 | 0 | 0 | 1 | 0 | 0 | 0 | 0 |
| Robinsoniella_OTU#1304   | 0 | 0 | 0 | 0 | 0 | 0 | 0 | 0 | 0 | 0 | 0 | 0 | 0 | 1 | 0 | 0 | 0 | 0 |
| Anaerophaga_OTU#1305     | 0 | 0 | 0 | 0 | 0 | 0 | 0 | 0 | 0 | 0 | 0 | 0 | 0 | 1 | 0 | 0 | 0 | 0 |
| Paludibacter_OTU#1306    | 0 | 0 | 0 | 0 | 0 | 0 | 0 | 0 | 0 | 0 | 0 | 0 | 0 | 1 | 0 | 0 | 0 | 0 |
| Paludibacter_OTU#1307    | 0 | 0 | 0 | 0 | 0 | 0 | 0 | 0 | 0 | 0 | 0 | 0 | 0 | 1 | 0 | 0 | 0 | 0 |

Supplementary Table 5

|                          |   |   |   |   |   |   |   |   |   |   |   |   |   |   |   |   |   |   |   |
|--------------------------|---|---|---|---|---|---|---|---|---|---|---|---|---|---|---|---|---|---|---|
| Roseburia_OTU#1308       | 0 | 0 | 0 | 0 | 0 | 0 | 0 | 0 | 0 | 0 | 0 | 0 | 0 | 1 | 0 | 0 | 0 | 0 | 0 |
| Paludibacter_OTU#1309    | 0 | 0 | 0 | 0 | 0 | 0 | 0 | 0 | 0 | 0 | 0 | 0 | 0 | 1 | 0 | 0 | 0 | 0 | 0 |
| Oscillibacter_OTU#1310   | 0 | 0 | 0 | 0 | 0 | 0 | 0 | 0 | 0 | 0 | 0 | 0 | 0 | 1 | 0 | 0 | 0 | 0 | 0 |
| Roseburia_OTU#1311       | 0 | 0 | 0 | 0 | 0 | 0 | 0 | 0 | 0 | 0 | 0 | 0 | 0 | 1 | 0 | 0 | 0 | 0 | 0 |
| Acetitomaculum_OTU#1312  | 0 | 0 | 0 | 0 | 0 | 0 | 0 | 0 | 0 | 0 | 0 | 0 | 0 | 1 | 0 | 0 | 0 | 0 | 0 |
| Paludibacter_OTU#1313    | 0 | 0 | 0 | 0 | 0 | 0 | 0 | 0 | 0 | 0 | 0 | 0 | 0 | 1 | 0 | 0 | 0 | 0 | 0 |
| Roseburia_OTU#1314       | 0 | 0 | 0 | 0 | 0 | 0 | 0 | 0 | 0 | 0 | 0 | 0 | 0 | 1 | 0 | 0 | 0 | 0 | 0 |
| Anaerophaga_OTU#1315     | 0 | 0 | 0 | 0 | 0 | 0 | 0 | 0 | 0 | 0 | 0 | 0 | 0 | 1 | 0 | 0 | 0 | 0 | 0 |
| Robinsoniella_OTU#1316   | 0 | 0 | 0 | 0 | 0 | 0 | 0 | 0 | 0 | 0 | 0 | 0 | 0 | 1 | 0 | 0 | 0 | 0 | 0 |
| Sediminitomix_OTU#1317   | 0 | 0 | 0 | 0 | 0 | 0 | 0 | 0 | 0 | 0 | 0 | 0 | 0 | 1 | 0 | 0 | 0 | 0 | 0 |
| Limibacter_OTU#1318      | 0 | 0 | 0 | 0 | 0 | 0 | 0 | 0 | 0 | 0 | 0 | 0 | 0 | 1 | 0 | 0 | 0 | 0 | 0 |
| Pseudozobellia_OTU#1319  | 0 | 0 | 0 | 0 | 0 | 0 | 0 | 0 | 0 | 0 | 0 | 0 | 0 | 1 | 0 | 0 | 0 | 0 | 0 |
| Anaerophaga_OTU#1320     | 0 | 0 | 0 | 0 | 0 | 0 | 0 | 0 | 0 | 0 | 0 | 0 | 0 | 1 | 0 | 0 | 0 | 0 | 0 |
| Lachnobacterium_OTU#1321 | 0 | 0 | 0 | 0 | 0 | 0 | 0 | 0 | 0 | 0 | 0 | 0 | 0 | 1 | 0 | 0 | 0 | 0 | 0 |
| Parasutterella_OTU#1322  | 0 | 0 | 0 | 0 | 0 | 0 | 0 | 0 | 0 | 1 | 0 | 0 | 0 | 0 | 0 | 0 | 0 | 0 | 0 |
| Rikenella_OTU#1323       | 0 | 0 | 0 | 0 | 0 | 0 | 0 | 0 | 0 | 1 | 0 | 0 | 0 | 0 | 0 | 0 | 0 | 0 | 0 |
| Anaerophaga_OTU#1324     | 0 | 0 | 0 | 0 | 0 | 0 | 0 | 0 | 0 | 1 | 0 | 0 | 0 | 0 | 0 | 0 | 0 | 0 | 0 |
| Asaccharobacter_OTU#1325 | 0 | 0 | 0 | 0 | 0 | 0 | 0 | 0 | 0 | 1 | 0 | 0 | 0 | 0 | 0 | 0 | 0 | 0 | 0 |
| Anaerophaga_OTU#1326     | 0 | 0 | 0 | 0 | 0 | 0 | 0 | 0 | 0 | 1 | 0 | 0 | 0 | 0 | 0 | 0 | 0 | 0 | 0 |

**Supplementary Table 6. SIMPER analysis of *Ace2*<sup>+/-y</sup> and *Ace2*<sup>-/-y</sup> mice with or without nicotinamide (NAM) treatment.**

SIMPER analysis was performed to detect OTUs contributing to the dissimilarities in ileocaecal microbial communities related to host genotype and nicotinamide (NAM) treatments. All significant OTUs are ranked according to their contribution. Average abundance of OTUs in each treatment/genotype group is shown as percentages. Contribution of each OTU to the overall community is also given in %. Bray Curtis dissimilar measures were used to perform the analyses.

| OTUs Affiliation        | <i>Ace2</i> <sup>-/-y</sup> | <i>Ace2</i> <sup>-/-y</sup><br>+ NAM | <i>Ace2</i> <sup>+/-y</sup> | <i>Ace2</i> <sup>+/-y</sup><br>+ NAM | Contribution | Cumulative % |
|-------------------------|-----------------------------|--------------------------------------|-----------------------------|--------------------------------------|--------------|--------------|
| Allobaculum_OTU#2       | 22.79                       | 0.12                                 | 0.00                        | 0.02                                 | 5.29         | 16.81        |
| Limibacter_OTU#5        | 9.19                        | 7.20                                 | 6.40                        | 8.86                                 | 3.21         | 21.01        |
| Robinsoniella_OTU#523   | 0.00                        | 0.00                                 | 12.91                       | 0.00                                 | 2.98         | 24.90        |
| Tannerella_OTU#22       | 0.85                        | 4.94                                 | 6.35                        | 7.72                                 | 2.93         | 28.73        |
| Rikenella_OTU#68        | 0.42                        | 2.74                                 | 2.83                        | 10.40                                | 2.77         | 32.36        |
| Parasutterella_OTU#105  | 0.65                        | 9.22                                 | 0.00                        | 0.30                                 | 2.51         | 35.65        |
| Paludibacter_OTU#62     | 0.15                        | 0.12                                 | 0.55                        | 9.02                                 | 2.43         | 38.83        |
| Lactobacillus_OTU#116   | 0.15                        | 0.22                                 | 0.00                        | 8.56                                 | 2.32         | 41.86        |
| Parasutterella_OTU#67   | 2.20                        | 4.22                                 | 2.35                        | 9.20                                 | 2.18         | 44.70        |
| Paludibacter_OTU#123    | 0.00                        | 1.52                                 | 7.85                        | 4.40                                 | 2.14         | 47.50        |
| Roseburia_OTU#356       | 0.00                        | 0.02                                 | 0.00                        | 7.20                                 | 1.94         | 50.03        |
| Anaerophaga_OTU#8       | 2.68                        | 5.86                                 | 0.28                        | 0.00                                 | 1.82         | 52.42        |
| Paludibacter_OTU#16     | 2.15                        | 4.20                                 | 0.33                        | 4.20                                 | 1.35         | 54.18        |
| Barnesiella_OTU#43      | 2.68                        | 0.08                                 | 4.60                        | 0.90                                 | 1.29         | 55.86        |
| Paludibacter_OTU#71     | 0.52                        | 0.26                                 | 5.45                        | 0.22                                 | 1.28         | 57.54        |
| Sporacetigenium_OTU#225 | 0.00                        | 0.08                                 | 0.00                        | 4.72                                 | 1.28         | 59.21        |
| Rikenella_OTU#33        | 0.52                        | 2.60                                 | 1.08                        | 3.48                                 | 1.14         | 60.71        |
| Limibacter_OTU#226      | 0.50                        | 3.78                                 | 0.00                        | 0.08                                 | 1.04         | 62.07        |

|                                    |      |      |      |      |      |       |
|------------------------------------|------|------|------|------|------|-------|
| Marvinbryantia_OTU#471             | 0.42 | 0.00 | 3.50 | 0.00 | 0.85 | 63.19 |
| Barnesiella_OTU#34                 | 1.40 | 2.66 | 0.23 | 0.98 | 0.81 | 64.25 |
| Barnesiella_OTU#35                 | 3.25 | 0.22 | 1.15 | 0.34 | 0.81 | 65.32 |
| Paludibacter_OTU#118               | 0.60 | 2.60 | 1.30 | 1.12 | 0.71 | 66.24 |
| Anaerophaga_OTU#15                 | 0.90 | 1.98 | 0.05 | 0.00 | 0.62 | 67.05 |
| Paludibacter_OTU#57                | 1.20 | 1.20 | 2.40 | 1.00 | 0.60 | 67.83 |
| Anaerophaga_OTU#122                | 0.00 | 0.00 | 2.10 | 0.06 | 0.49 | 68.48 |
| Paludibacter_OTU#154               | 0.27 | 0.76 | 0.25 | 1.28 | 0.44 | 69.06 |
| Dichelobacter_OTU#221              | 0.00 | 1.64 | 0.00 | 0.00 | 0.44 | 69.63 |
| unclassified_Clostridiales_OTU#596 | 0.00 | 1.42 | 0.05 | 0.00 | 0.39 | 70.14 |
| Allobaculum_OTU#119                | 0.00 | 0.00 | 0.00 | 1.42 | 0.38 | 70.64 |
| Paludibacter_OTU#70                | 0.47 | 0.12 | 0.00 | 1.24 | 0.37 | 71.13 |
| Rikenella_OTU#108                  | 0.20 | 1.18 | 0.10 | 0.38 | 0.34 | 71.57 |
| Coprococcus_OTU#524                | 0.02 | 0.00 | 1.38 | 0.00 | 0.32 | 71.99 |
| Allobaculum_OTU#17                 | 1.25 | 0.04 | 0.03 | 0.02 | 0.29 | 72.37 |
| Helicobacter_OTU#704               | 0.70 | 0.62 | 0.03 | 0.02 | 0.28 | 72.74 |
| Barnesiella_OTU#129                | 0.20 | 0.84 | 0.88 | 0.12 | 0.28 | 73.11 |
| Ralstonia_OTU#515                  | 0.07 | 0.00 | 0.33 | 0.72 | 0.26 | 73.45 |
| Allobaculum_OTU#47                 | 1.05 | 0.06 | 0.08 | 0.12 | 0.26 | 73.78 |
| Allobaculum_OTU#32                 | 1.05 | 0.02 | 0.10 | 0.04 | 0.25 | 74.11 |
| Paludibacter_OTU#138               | 0.17 | 0.02 | 0.93 | 0.04 | 0.23 | 74.41 |
| Mucispirillum_OTU#1014             | 0.00 | 0.76 | 0.00 | 0.00 | 0.20 | 74.68 |
| Anaerophaga_OTU#14                 | 0.40 | 0.56 | 0.03 | 0.00 | 0.19 | 74.93 |
| Robinsoniella_OTU#868              | 0.00 | 0.00 | 0.80 | 0.00 | 0.19 | 75.17 |
| Olsenella_OTU#58                   | 0.67 | 0.12 | 0.15 | 0.00 | 0.18 | 75.40 |
| Marvinbryantia_OTU#533             | 0.12 | 0.00 | 0.60 | 0.00 | 0.16 | 75.61 |
| Allobaculum_OTU#256                | 0.00 | 0.58 | 0.00 | 0.00 | 0.16 | 75.82 |
| Butyricoccus_OTU#522               | 0.17 | 0.00 | 0.50 | 0.00 | 0.14 | 76.01 |
| Allobaculum_OTU#125                | 0.00 | 0.00 | 0.43 | 0.34 | 0.14 | 76.19 |
| Limibacter_OTU#29                  | 0.52 | 0.00 | 0.18 | 0.00 | 0.14 | 76.38 |

Supplementary Table 6

|                        |      |      |      |      |      |       |
|------------------------|------|------|------|------|------|-------|
| Ureaplasma_OTU#705     | 0.00 | 0.52 | 0.00 | 0.00 | 0.14 | 76.56 |
| Oscillibacter_OTU#619  | 0.00 | 0.00 | 0.60 | 0.00 | 0.14 | 76.74 |
| Limibacter_OTU#3       | 0.47 | 0.02 | 0.28 | 0.08 | 0.14 | 76.92 |
| Limibacter_OTU#458     | 0.30 | 0.02 | 0.35 | 0.00 | 0.13 | 77.10 |
| Mucispirillum_OTU#998  | 0.00 | 0.48 | 0.00 | 0.00 | 0.13 | 77.26 |
| Allobaculum_OTU#4      | 0.55 | 0.00 | 0.00 | 0.00 | 0.13 | 77.43 |
| Peptococcus_OTU#24     | 0.02 | 0.00 | 0.53 | 0.00 | 0.13 | 77.60 |
| Barnesiella_OTU#230    | 0.27 | 0.34 | 0.00 | 0.00 | 0.12 | 77.76 |
| Paludibacter_OTU#106   | 0.05 | 0.18 | 0.40 | 0.14 | 0.12 | 77.92 |
| Anaerobacter_OTU#443   | 0.45 | 0.02 | 0.13 | 0.00 | 0.12 | 78.08 |
| Limibacter_OTU#184     | 0.17 | 0.42 | 0.03 | 0.06 | 0.12 | 78.24 |
| Mucispirillum_OTU#545  | 0.00 | 0.00 | 0.50 | 0.00 | 0.12 | 78.39 |
| Ruminococcus_OTU#580   | 0.05 | 0.00 | 0.48 | 0.00 | 0.11 | 78.54 |
| Blautia_OTU#233        | 0.00 | 0.18 | 0.00 | 0.28 | 0.11 | 78.69 |
| Robinsoniella_OTU#421  | 0.47 | 0.00 | 0.00 | 0.00 | 0.11 | 78.83 |
| Paludibacter_OTU#94    | 0.20 | 0.20 | 0.10 | 0.20 | 0.11 | 78.97 |
| Paludibacter_OTU#143   | 0.00 | 0.00 | 0.13 | 0.34 | 0.11 | 79.11 |
| Salinihabitans_OTU#165 | 0.00 | 0.04 | 0.03 | 0.38 | 0.11 | 79.25 |
| Paludibacter_OTU#378   | 0.00 | 0.00 | 0.45 | 0.02 | 0.11 | 79.39 |
| Paludibacter_OTU#148   | 0.30 | 0.12 | 0.00 | 0.16 | 0.10 | 79.53 |
| Anaerophaga_OTU#126    | 0.00 | 0.12 | 0.28 | 0.10 | 0.10 | 79.66 |
| Lactobacillus_OTU#275  | 0.05 | 0.06 | 0.40 | 0.00 | 0.10 | 79.79 |
| Marvinbryantia_OTU#526 | 0.00 | 0.00 | 0.43 | 0.00 | 0.10 | 79.92 |
| Paludibacter_OTU#144   | 0.05 | 0.18 | 0.18 | 0.18 | 0.10 | 80.04 |
| Paludibacter_OTU#98    | 0.05 | 0.08 | 0.13 | 0.26 | 0.10 | 80.17 |
| Parasutterella_OTU#257 | 0.12 | 0.28 | 0.00 | 0.00 | 0.09 | 80.29 |
| Rikenella_OTU#212      | 0.05 | 0.16 | 0.08 | 0.22 | 0.09 | 80.41 |
| Limibacter_OTU#170     | 0.05 | 0.30 | 0.00 | 0.04 | 0.09 | 80.52 |
| Limibacter_OTU#224     | 0.02 | 0.32 | 0.00 | 0.00 | 0.09 | 80.64 |
| Turicibacter_OTU#900   | 0.00 | 0.00 | 0.38 | 0.00 | 0.09 | 80.75 |

Supplementary Table 6

|                                          |      |      |      |      |      |       |
|------------------------------------------|------|------|------|------|------|-------|
| Allobaculum_OTU#12                       | 0.37 | 0.00 | 0.00 | 0.00 | 0.09 | 80.87 |
| Acetitomaculum_OTU#604                   | 0.05 | 0.00 | 0.35 | 0.00 | 0.09 | 80.98 |
| Paludibacter_OTU#107                     | 0.10 | 0.08 | 0.03 | 0.24 | 0.09 | 81.09 |
| unclassified_Porphyrromonadaceae_OTU#153 | 0.05 | 0.26 | 0.00 | 0.10 | 0.08 | 81.20 |
| Paludibacter_OTU#270                     | 0.25 | 0.16 | 0.00 | 0.00 | 0.08 | 81.31 |
| Barnesiella_OTU#875                      | 0.00 | 0.00 | 0.35 | 0.00 | 0.08 | 81.41 |
| Limibacter_OTU#149                       | 0.12 | 0.06 | 0.20 | 0.08 | 0.08 | 81.52 |
| Lachnobacterium_OTU#424                  | 0.32 | 0.00 | 0.00 | 0.02 | 0.08 | 81.62 |
| Paludibacter_OTU#83                      | 0.12 | 0.24 | 0.13 | 0.08 | 0.08 | 81.72 |
| Anaerophaga_OTU#329                      | 0.00 | 0.00 | 0.28 | 0.06 | 0.07 | 81.81 |
| Oscillibacter_OTU#535                    | 0.00 | 0.00 | 0.30 | 0.00 | 0.07 | 81.90 |
| Paludibacter_OTU#261                     | 0.20 | 0.14 | 0.00 | 0.00 | 0.07 | 81.99 |
| Acetitomaculum_OTU#620                   | 0.10 | 0.00 | 0.23 | 0.00 | 0.07 | 82.08 |
| Lachnobacterium_OTU#298                  | 0.12 | 0.04 | 0.20 | 0.00 | 0.07 | 82.17 |
| Paludibacter_OTU#41                      | 0.05 | 0.12 | 0.03 | 0.14 | 0.07 | 82.26 |
| Blautia_OTU#877                          | 0.05 | 0.00 | 0.25 | 0.00 | 0.07 | 82.35 |
| unclassified_Porphyrromonadaceae_OTU#419 | 0.22 | 0.00 | 0.10 | 0.00 | 0.07 | 82.44 |
| Anaerophaga_OTU#277                      | 0.05 | 0.22 | 0.00 | 0.00 | 0.06 | 82.52 |
| Robinsoniella_OTU#528                    | 0.00 | 0.00 | 0.28 | 0.00 | 0.06 | 82.60 |
| Allobaculum_OTU#39                       | 0.27 | 0.00 | 0.00 | 0.00 | 0.06 | 82.69 |
| Butyrivibrio_OTU#890                     | 0.00 | 0.00 | 0.28 | 0.00 | 0.06 | 82.77 |
| Robinsoniella_OTU#884                    | 0.00 | 0.00 | 0.28 | 0.00 | 0.06 | 82.85 |
| Rikenella_OTU#99                         | 0.10 | 0.00 | 0.20 | 0.00 | 0.06 | 82.93 |
| Barnesiella_OTU#300                      | 0.02 | 0.06 | 0.08 | 0.18 | 0.06 | 83.02 |
| Anaerophaga_OTU#246                      | 0.05 | 0.20 | 0.00 | 0.00 | 0.06 | 83.10 |
| unclassified_Porphyrromonadaceae_OTU#266 | 0.12 | 0.16 | 0.00 | 0.00 | 0.06 | 83.18 |
| Blautia_OTU#915                          | 0.07 | 0.00 | 0.20 | 0.00 | 0.06 | 83.26 |
| Limibacter_OTU#136                       | 0.12 | 0.00 | 0.00 | 0.16 | 0.06 | 83.34 |
| Anaerophaga_OTU#202                      | 0.07 | 0.00 | 0.23 | 0.04 | 0.06 | 83.42 |
| Anaerophaga_OTU#251                      | 0.10 | 0.18 | 0.00 | 0.00 | 0.06 | 83.50 |

Supplementary Table 6

|                                   |      |      |      |      |      |       |
|-----------------------------------|------|------|------|------|------|-------|
| Parasutterella_OTU#239            | 0.05 | 0.20 | 0.00 | 0.00 | 0.06 | 83.57 |
| Parabacteroides_OTU#556           | 0.00 | 0.00 | 0.20 | 0.08 | 0.06 | 83.65 |
| Robinsoniella_OTU#534             | 0.00 | 0.00 | 0.25 | 0.00 | 0.06 | 83.73 |
| Roseburia_OTU#553                 | 0.00 | 0.00 | 0.25 | 0.00 | 0.06 | 83.80 |
| Paludibacter_OTU#38               | 0.15 | 0.16 | 0.05 | 0.02 | 0.06 | 83.88 |
| Paludibacter_OTU#379              | 0.00 | 0.00 | 0.23 | 0.02 | 0.05 | 83.95 |
| Syntrophococcus_OTU#824           | 0.17 | 0.00 | 0.08 | 0.00 | 0.05 | 84.02 |
| Oscillibacter_OTU#536             | 0.05 | 0.00 | 0.20 | 0.00 | 0.05 | 84.09 |
| Rikenella_OTU#227                 | 0.00 | 0.20 | 0.00 | 0.00 | 0.05 | 84.16 |
| Zhangella_OTU#562                 | 0.05 | 0.00 | 0.20 | 0.00 | 0.05 | 84.23 |
| Paludibacter_OTU#158              | 0.00 | 0.04 | 0.10 | 0.12 | 0.05 | 84.30 |
| Paludibacter_OTU#182              | 0.00 | 0.12 | 0.00 | 0.12 | 0.05 | 84.37 |
| Coprococcus_OTU#882               | 0.00 | 0.00 | 0.23 | 0.00 | 0.05 | 84.44 |
| Parasporobacterium_OTU#491        | 0.22 | 0.00 | 0.00 | 0.00 | 0.05 | 84.51 |
| Flexithrix_OTU#78                 | 0.10 | 0.14 | 0.00 | 0.00 | 0.05 | 84.57 |
| Paludibacter_OTU#26               | 0.15 | 0.00 | 0.03 | 0.10 | 0.05 | 84.64 |
| Butyricoccus_OTU#102              | 0.05 | 0.00 | 0.18 | 0.00 | 0.05 | 84.70 |
| Paludibacter_OTU#579              | 0.05 | 0.00 | 0.18 | 0.00 | 0.05 | 84.77 |
| Tannerella_OTU#132                | 0.00 | 0.02 | 0.10 | 0.10 | 0.05 | 84.83 |
| Butyricoccus_OTU#537              | 0.00 | 0.00 | 0.20 | 0.00 | 0.05 | 84.89 |
| Allobaculum_OTU#11                | 0.20 | 0.00 | 0.00 | 0.00 | 0.05 | 84.95 |
| Howardella_OTU#644                | 0.00 | 0.00 | 0.20 | 0.00 | 0.05 | 85.01 |
| Barnesiella_OTU#675               | 0.00 | 0.00 | 0.15 | 0.06 | 0.05 | 85.07 |
| Bacteroides_OTU#614               | 0.00 | 0.00 | 0.05 | 0.14 | 0.05 | 85.13 |
| unclassified_Bacteroidales_OTU#77 | 0.15 | 0.06 | 0.03 | 0.00 | 0.05 | 85.19 |
| Parasutterella_OTU#82             | 0.02 | 0.16 | 0.00 | 0.00 | 0.05 | 85.25 |
| Paludibacter_OTU#69               | 0.17 | 0.02 | 0.00 | 0.00 | 0.04 | 85.31 |
| Paludibacter_OTU#53               | 0.10 | 0.08 | 0.08 | 0.10 | 0.04 | 85.36 |
| Paludibacter_OTU#161              | 0.00 | 0.02 | 0.00 | 0.14 | 0.04 | 85.42 |
| Tannerella_OTU#9                  | 0.10 | 0.04 | 0.00 | 0.08 | 0.04 | 85.47 |

Supplementary Table 6

|                         |      |      |      |      |      |       |
|-------------------------|------|------|------|------|------|-------|
| Tannerella_OTU#175      | 0.00 | 0.08 | 0.05 | 0.08 | 0.04 | 85.52 |
| Paludibacter_OTU#234    | 0.10 | 0.08 | 0.00 | 0.00 | 0.04 | 85.58 |
| Syntrophococcus_OTU#776 | 0.10 | 0.00 | 0.10 | 0.00 | 0.04 | 85.63 |
| Dorea_OTU#611           | 0.00 | 0.00 | 0.18 | 0.00 | 0.04 | 85.69 |
| Marvinbryantia_OTU#680  | 0.00 | 0.00 | 0.18 | 0.00 | 0.04 | 85.74 |
| Paludibacter_OTU#512    | 0.17 | 0.00 | 0.00 | 0.00 | 0.04 | 85.79 |
| Limibacter_OTU#142      | 0.00 | 0.00 | 0.05 | 0.12 | 0.04 | 85.84 |
| Paludibacter_OTU#213    | 0.00 | 0.02 | 0.13 | 0.06 | 0.04 | 85.90 |
| Terasakiella_OTU#912    | 0.00 | 0.00 | 0.18 | 0.00 | 0.04 | 85.95 |
| Paludibacter_OTU#461    | 0.05 | 0.06 | 0.10 | 0.00 | 0.04 | 86.00 |
| Anaerophaga_OTU#49      | 0.12 | 0.08 | 0.00 | 0.00 | 0.04 | 86.05 |
| Barnesiella_OTU#189     | 0.00 | 0.10 | 0.05 | 0.02 | 0.04 | 86.11 |
| Heliobacillus_OTU#541   | 0.02 | 0.00 | 0.15 | 0.00 | 0.04 | 86.16 |
| Paludibacter_OTU#360    | 0.02 | 0.06 | 0.13 | 0.02 | 0.04 | 86.20 |
| Limibacter_OTU#301      | 0.00 | 0.14 | 0.00 | 0.00 | 0.04 | 86.25 |
| Acetitomaculum_OTU#518  | 0.05 | 0.00 | 0.13 | 0.00 | 0.04 | 86.30 |
| Paludibacter_OTU#367    | 0.05 | 0.06 | 0.05 | 0.04 | 0.04 | 86.35 |
| Rikenella_OTU#145       | 0.02 | 0.06 | 0.08 | 0.10 | 0.04 | 86.40 |
| Tannerella_OTU#278      | 0.02 | 0.12 | 0.00 | 0.02 | 0.04 | 86.45 |
| Rikenella_OTU#429       | 0.02 | 0.12 | 0.00 | 0.00 | 0.04 | 86.49 |
| Paludibacter_OTU#76     | 0.02 | 0.12 | 0.00 | 0.00 | 0.04 | 86.54 |
| Oscillibacter_OTU#481   | 0.15 | 0.00 | 0.00 | 0.00 | 0.03 | 86.58 |
| Lachnobacterium_OTU#386 | 0.15 | 0.00 | 0.00 | 0.00 | 0.03 | 86.63 |
| Robinsoniella_OTU#872   | 0.00 | 0.00 | 0.15 | 0.00 | 0.03 | 86.67 |
| Paludibacter_OTU#703    | 0.00 | 0.12 | 0.03 | 0.00 | 0.03 | 86.72 |
| Robinsoniella_OTU#546   | 0.00 | 0.00 | 0.15 | 0.00 | 0.03 | 86.77 |
| Paludibacter_OTU#319    | 0.00 | 0.06 | 0.00 | 0.08 | 0.03 | 86.81 |
| Paludibacter_OTU#209    | 0.12 | 0.00 | 0.00 | 0.02 | 0.03 | 86.85 |
| Oscillibacter_OTU#396   | 0.12 | 0.00 | 0.03 | 0.00 | 0.03 | 86.90 |
| Dorea_OTU#836           | 0.12 | 0.00 | 0.03 | 0.00 | 0.03 | 86.94 |

Supplementary Table 6



|                            |      |      |      |      |      |       |
|----------------------------|------|------|------|------|------|-------|
| Paludibacter_OTU#218       | 0.00 | 0.06 | 0.00 | 0.08 | 0.03 | 86.98 |
| Paludibacter_OTU#133       | 0.00 | 0.00 | 0.00 | 0.12 | 0.03 | 87.02 |
| Anaerostipes_OTU#245       | 0.00 | 0.04 | 0.03 | 0.08 | 0.03 | 87.07 |
| Barnesiella_OTU#208        | 0.00 | 0.00 | 0.10 | 0.04 | 0.03 | 87.11 |
| Barnesiella_OTU#812        | 0.02 | 0.02 | 0.10 | 0.00 | 0.03 | 87.14 |
| Paludibacter_OTU#845       | 0.07 | 0.00 | 0.08 | 0.00 | 0.03 | 87.18 |
| Paludibacter_OTU#220       | 0.00 | 0.00 | 0.08 | 0.06 | 0.03 | 87.22 |
| Paludibacter_OTU#211       | 0.00 | 0.00 | 0.03 | 0.10 | 0.03 | 87.26 |
| Parasporobacterium_OTU#948 | 0.00 | 0.00 | 0.13 | 0.00 | 0.03 | 87.30 |
| Butyricococcus_OTU#544     | 0.00 | 0.00 | 0.13 | 0.00 | 0.03 | 87.34 |
| Acetitomaculum_OTU#874     | 0.00 | 0.00 | 0.13 | 0.00 | 0.03 | 87.37 |
| Rikenella_OTU#185          | 0.00 | 0.04 | 0.03 | 0.08 | 0.03 | 87.41 |
| Anaerophaga_OTU#636        | 0.00 | 0.00 | 0.13 | 0.00 | 0.03 | 87.45 |
| Barnesiella_OTU#115        | 0.12 | 0.00 | 0.00 | 0.00 | 0.03 | 87.49 |
| Butyrivibrio_OTU#685       | 0.00 | 0.00 | 0.13 | 0.00 | 0.03 | 87.52 |
| Robinsoniella_OTU#558      | 0.00 | 0.00 | 0.13 | 0.00 | 0.03 | 87.56 |
| Paludibacter_OTU#97        | 0.05 | 0.04 | 0.00 | 0.06 | 0.03 | 87.60 |
| Paludibacter_OTU#732       | 0.00 | 0.04 | 0.03 | 0.06 | 0.03 | 87.64 |
| Paludibacter_OTU#307       | 0.02 | 0.08 | 0.03 | 0.02 | 0.03 | 87.67 |
| Barnesiella_OTU#349        | 0.00 | 0.02 | 0.05 | 0.06 | 0.03 | 87.71 |
| Paludibacter_OTU#146       | 0.02 | 0.04 | 0.05 | 0.04 | 0.03 | 87.75 |
| Anaerophaga_OTU#199        | 0.02 | 0.04 | 0.05 | 0.04 | 0.03 | 87.78 |
| Limibacter_OTU#92          | 0.10 | 0.02 | 0.05 | 0.02 | 0.03 | 87.82 |
| Paludibacter_OTU#104       | 0.07 | 0.00 | 0.05 | 0.02 | 0.03 | 87.86 |
| Syntrophococcus_OTU#930    | 0.02 | 0.00 | 0.10 | 0.00 | 0.03 | 87.89 |
| Paludibacter_OTU#758       | 0.00 | 0.00 | 0.00 | 0.10 | 0.03 | 87.93 |
| Propionibacterium_OTU#1241 | 0.00 | 0.00 | 0.00 | 0.10 | 0.03 | 87.96 |
| Barnesiella_OTU#316        | 0.02 | 0.00 | 0.05 | 0.06 | 0.03 | 88.00 |
| Asaccharobacter_OTU#56     | 0.07 | 0.00 | 0.05 | 0.00 | 0.03 | 88.03 |
| Paludibacter_OTU#197       | 0.00 | 0.04 | 0.03 | 0.06 | 0.03 | 88.07 |

Supplementary Table 6

|                                    |      |      |      |      |      |       |
|------------------------------------|------|------|------|------|------|-------|
| Paludibacter_OTU#247               | 0.00 | 0.06 | 0.05 | 0.00 | 0.03 | 88.10 |
| Paludibacter_OTU#183               | 0.00 | 0.00 | 0.10 | 0.02 | 0.03 | 88.14 |
| Limibacter_OTU#112                 | 0.07 | 0.06 | 0.00 | 0.00 | 0.03 | 88.17 |
| Limibacter_OTU#177                 | 0.07 | 0.00 | 0.00 | 0.04 | 0.03 | 88.20 |
| Paludibacter_OTU#433               | 0.02 | 0.08 | 0.00 | 0.00 | 0.03 | 88.24 |
| Paludibacter_OTU#708               | 0.02 | 0.08 | 0.00 | 0.00 | 0.03 | 88.27 |
| Barnesiella_OTU#178                | 0.00 | 0.00 | 0.03 | 0.08 | 0.03 | 88.30 |
| Parasutterella_OTU#110             | 0.10 | 0.00 | 0.03 | 0.00 | 0.03 | 88.34 |
| Anaerophaga_OTU#283                | 0.05 | 0.06 | 0.00 | 0.00 | 0.03 | 88.37 |
| Paludibacter_OTU#198               | 0.00 | 0.06 | 0.00 | 0.04 | 0.03 | 88.40 |
| Rikenella_OTU#409                  | 0.02 | 0.08 | 0.00 | 0.00 | 0.02 | 88.44 |
| Paludibacter_OTU#272               | 0.02 | 0.08 | 0.00 | 0.00 | 0.02 | 88.47 |
| Streptophyta_OTU#945               | 0.00 | 0.02 | 0.03 | 0.06 | 0.02 | 88.50 |
| Paludibacter_OTU#791               | 0.02 | 0.02 | 0.08 | 0.00 | 0.02 | 88.53 |
| Paludibacter_OTU#370               | 0.07 | 0.00 | 0.03 | 0.02 | 0.02 | 88.56 |
| Anaerotruncus_OTU#494              | 0.05 | 0.04 | 0.00 | 0.02 | 0.02 | 88.59 |
| Limibacter_OTU#157                 | 0.00 | 0.06 | 0.00 | 0.04 | 0.02 | 88.63 |
| Tannerella_OTU#339                 | 0.00 | 0.02 | 0.05 | 0.04 | 0.02 | 88.66 |
| Acetitomaculum_OTU#571             | 0.00 | 0.00 | 0.10 | 0.00 | 0.02 | 88.69 |
| Robinsoniella_OTU#1145             | 0.00 | 0.00 | 0.10 | 0.00 | 0.02 | 88.72 |
| Allobaculum_OTU#66                 | 0.10 | 0.00 | 0.00 | 0.00 | 0.02 | 88.75 |
| Howardella_OTU#503                 | 0.10 | 0.00 | 0.00 | 0.00 | 0.02 | 88.78 |
| Syntrophococcus_OTU#918            | 0.00 | 0.00 | 0.10 | 0.00 | 0.02 | 88.81 |
| Roseburia_OTU#581                  | 0.00 | 0.00 | 0.10 | 0.00 | 0.02 | 88.84 |
| Lachnobacterium_OTU#589            | 0.00 | 0.00 | 0.10 | 0.00 | 0.02 | 88.87 |
| unclassified_Clostridiales_OTU#438 | 0.10 | 0.00 | 0.00 | 0.00 | 0.02 | 88.90 |
| Barnesiella_OTU#499                | 0.10 | 0.00 | 0.00 | 0.00 | 0.02 | 88.93 |
| Paludibacter_OTU#651               | 0.00 | 0.00 | 0.10 | 0.00 | 0.02 | 88.96 |
| Butyricoccus_OTU#946               | 0.00 | 0.00 | 0.10 | 0.00 | 0.02 | 88.99 |
| Limibacter_OTU#416                 | 0.10 | 0.00 | 0.00 | 0.00 | 0.02 | 89.02 |

Supplementary Table 6

|                                         |      |      |      |      |      |       |
|-----------------------------------------|------|------|------|------|------|-------|
| Allobaculum_OTU#72                      | 0.10 | 0.00 | 0.00 | 0.00 | 0.02 | 89.05 |
| Coprococcus_OTU#566                     | 0.00 | 0.00 | 0.10 | 0.00 | 0.02 | 89.08 |
| Butyrivibrio_OTU#661                    | 0.00 | 0.00 | 0.10 | 0.00 | 0.02 | 89.11 |
| Allobaculum_OTU#19                      | 0.10 | 0.00 | 0.00 | 0.00 | 0.02 | 89.14 |
| Acetitomaculum_OTU#941                  | 0.00 | 0.00 | 0.10 | 0.00 | 0.02 | 89.17 |
| Allobaculum_OTU#65                      | 0.10 | 0.00 | 0.00 | 0.00 | 0.02 | 89.20 |
| Barnesiella_OTU#335                     | 0.00 | 0.04 | 0.05 | 0.04 | 0.02 | 89.23 |
| Anaerophaga_OTU#586                     | 0.00 | 0.04 | 0.08 | 0.00 | 0.02 | 89.26 |
| Oscillibacter_OTU#643                   | 0.00 | 0.00 | 0.10 | 0.00 | 0.02 | 89.29 |
| Marvinbryantia_OTU#54                   | 0.02 | 0.00 | 0.08 | 0.00 | 0.02 | 89.32 |
| Limibacter_OTU#813                      | 0.07 | 0.02 | 0.00 | 0.00 | 0.02 | 89.35 |
| Limibacter_OTU#1006                     | 0.00 | 0.08 | 0.00 | 0.00 | 0.02 | 89.38 |
| Barnesiella_OTU#73                      | 0.07 | 0.00 | 0.03 | 0.00 | 0.02 | 89.41 |
| Paludibacter_OTU#304                    | 0.00 | 0.08 | 0.00 | 0.00 | 0.02 | 89.43 |
| Paludibacter_OTU#399                    | 0.07 | 0.00 | 0.03 | 0.00 | 0.02 | 89.46 |
| unclassified_Bacteroidales_OTU#737      | 0.00 | 0.08 | 0.00 | 0.00 | 0.02 | 89.49 |
| Paludibacter_OTU#492                    | 0.07 | 0.00 | 0.03 | 0.00 | 0.02 | 89.52 |
| Paludibacter_OTU#140                    | 0.00 | 0.00 | 0.00 | 0.08 | 0.02 | 89.55 |
| unclassified_Clostridiales_OTU#964      | 0.05 | 0.00 | 0.05 | 0.00 | 0.02 | 89.57 |
| Paludibacter_OTU#196                    | 0.00 | 0.00 | 0.00 | 0.08 | 0.02 | 89.60 |
| Limibacter_OTU#353                      | 0.02 | 0.00 | 0.05 | 0.04 | 0.02 | 89.63 |
| Diaphorobacter_OTU#975                  | 0.00 | 0.00 | 0.08 | 0.02 | 0.02 | 89.66 |
| Barnesiella_OTU#236                     | 0.02 | 0.06 | 0.00 | 0.00 | 0.02 | 89.69 |
| Paludibacter_OTU#100                    | 0.05 | 0.04 | 0.00 | 0.00 | 0.02 | 89.71 |
| unclassified_Porphyrimonadaceae_OTU#286 | 0.00 | 0.04 | 0.05 | 0.00 | 0.02 | 89.74 |
| Acetitomaculum_OTU#263                  | 0.00 | 0.04 | 0.05 | 0.00 | 0.02 | 89.77 |
| Paludibacter_OTU#485                    | 0.02 | 0.00 | 0.08 | 0.00 | 0.02 | 89.79 |
| unclassified_Bacteroidetes_OTU#465      | 0.02 | 0.06 | 0.00 | 0.00 | 0.02 | 89.82 |
| Barnesiella_OTU#748                     | 0.00 | 0.06 | 0.03 | 0.00 | 0.02 | 89.85 |
| Robinsoniella_OTU#648                   | 0.00 | 0.06 | 0.03 | 0.00 | 0.02 | 89.87 |

Supplementary Table 6

|                                          |      |      |      |      |      |       |
|------------------------------------------|------|------|------|------|------|-------|
| Paludibacter_OTU#139                     | 0.00 | 0.04 | 0.00 | 0.04 | 0.02 | 89.90 |
| unclassified_Porphyrimonadaceae_OTU#128  | 0.00 | 0.02 | 0.00 | 0.06 | 0.02 | 89.93 |
| Paludibacter_OTU#156                     | 0.00 | 0.04 | 0.00 | 0.04 | 0.02 | 89.95 |
| Rikenella_OTU#276                        | 0.00 | 0.06 | 0.00 | 0.02 | 0.02 | 89.98 |
| Rikenella_OTU#709                        | 0.00 | 0.06 | 0.03 | 0.00 | 0.02 | 90.00 |
| Limibacter_OTU#358                       | 0.05 | 0.00 | 0.03 | 0.02 | 0.02 | 90.03 |
| Limibacter_OTU#754                       | 0.02 | 0.02 | 0.05 | 0.00 | 0.02 | 90.05 |
| Limibacter_OTU#306                       | 0.05 | 0.02 | 0.00 | 0.02 | 0.02 | 90.07 |
| Paludibacter_OTU#207                     | 0.05 | 0.02 | 0.00 | 0.02 | 0.02 | 90.10 |
| unclassified_Porphyrimonadaceae_OTU#1016 | 0.02 | 0.04 | 0.03 | 0.00 | 0.02 | 90.12 |
| Barnesiella_OTU#720                      | 0.00 | 0.04 | 0.03 | 0.02 | 0.02 | 90.15 |
| Paludibacter_OTU#169                     | 0.02 | 0.02 | 0.00 | 0.04 | 0.02 | 90.17 |
| Paludibacter_OTU#796                     | 0.02 | 0.04 | 0.00 | 0.02 | 0.02 | 90.19 |
| Barnesiella_OTU#200                      | 0.00 | 0.02 | 0.03 | 0.04 | 0.02 | 90.22 |
| unclassified_Porphyrimonadaceae_OTU#414  | 0.02 | 0.04 | 0.00 | 0.02 | 0.02 | 90.24 |
| Marvinbryantia_OTU#672                   | 0.00 | 0.00 | 0.08 | 0.00 | 0.02 | 90.26 |
| Paludibacter_OTU#96                      | 0.07 | 0.00 | 0.00 | 0.00 | 0.02 | 90.28 |
| Allobaculum_OTU#10                       | 0.07 | 0.00 | 0.00 | 0.00 | 0.02 | 90.31 |
| Heliobacillus_OTU#807                    | 0.07 | 0.00 | 0.00 | 0.00 | 0.02 | 90.33 |
| Heliobacillus_OTU#434                    | 0.07 | 0.00 | 0.00 | 0.00 | 0.02 | 90.35 |
| Barnesiella_OTU#60                       | 0.07 | 0.00 | 0.00 | 0.00 | 0.02 | 90.37 |
| unclassified_Porphyrimonadaceae_OTU#495  | 0.07 | 0.00 | 0.00 | 0.00 | 0.02 | 90.40 |
| Anaerophaga_OTU#984                      | 0.00 | 0.00 | 0.08 | 0.00 | 0.02 | 90.42 |
| Oscillibacter_OTU#989                    | 0.00 | 0.00 | 0.08 | 0.00 | 0.02 | 90.44 |
| Lactonifactor_OTU#538                    | 0.00 | 0.00 | 0.08 | 0.00 | 0.02 | 90.47 |
| Lactonifactor_OTU#959                    | 0.00 | 0.00 | 0.08 | 0.00 | 0.02 | 90.49 |
| Butyricoccus_OTU#605                     | 0.00 | 0.00 | 0.08 | 0.00 | 0.02 | 90.51 |
| unclassified_Bacteroidales_OTU#191       | 0.02 | 0.02 | 0.03 | 0.02 | 0.02 | 90.53 |
| Barnesiella_OTU#1181                     | 0.00 | 0.00 | 0.08 | 0.00 | 0.02 | 90.56 |
| Limibacter_OTU#697                       | 0.00 | 0.00 | 0.08 | 0.00 | 0.02 | 90.58 |

Supplementary Table 6

|                              |      |      |      |      |      |       |
|------------------------------|------|------|------|------|------|-------|
| Anaerotruncus_OTU#919        | 0.00 | 0.00 | 0.08 | 0.00 | 0.02 | 90.60 |
| Coprococcus_OTU#560          | 0.00 | 0.00 | 0.08 | 0.00 | 0.02 | 90.62 |
| Robinsoniella_OTU#550        | 0.00 | 0.00 | 0.08 | 0.00 | 0.02 | 90.65 |
| Parasporobacterium_OTU#660   | 0.00 | 0.00 | 0.08 | 0.00 | 0.02 | 90.67 |
| Roseburia_OTU#529            | 0.00 | 0.00 | 0.08 | 0.00 | 0.02 | 90.69 |
| Parabacteroides_OTU#916      | 0.00 | 0.00 | 0.08 | 0.00 | 0.02 | 90.72 |
| Butyricoccus_OTU#936         | 0.00 | 0.00 | 0.08 | 0.00 | 0.02 | 90.74 |
| Roseburia_OTU#595            | 0.00 | 0.00 | 0.08 | 0.00 | 0.02 | 90.76 |
| Butyrivibrio_OTU#878         | 0.00 | 0.00 | 0.08 | 0.00 | 0.02 | 90.78 |
| Allobaculum_OTU#449          | 0.07 | 0.00 | 0.00 | 0.00 | 0.02 | 90.81 |
| Escherichia/Shigella_OTU#924 | 0.00 | 0.00 | 0.08 | 0.00 | 0.02 | 90.83 |
| Robinsoniella_OTU#1088       | 0.07 | 0.00 | 0.00 | 0.00 | 0.02 | 90.85 |
| Acetanaerobacterium_OTU#1069 | 0.07 | 0.00 | 0.00 | 0.00 | 0.02 | 90.87 |
| Roseburia_OTU#408            | 0.02 | 0.00 | 0.05 | 0.00 | 0.02 | 90.90 |
| Marvinbryantia_OTU#891       | 0.02 | 0.00 | 0.05 | 0.00 | 0.02 | 90.92 |
| Paludibacter_OTU#743         | 0.00 | 0.06 | 0.00 | 0.00 | 0.02 | 90.94 |
| Paludibacter_OTU#711         | 0.00 | 0.06 | 0.00 | 0.00 | 0.02 | 90.96 |
| Paludibacter_OTU#340         | 0.00 | 0.00 | 0.00 | 0.06 | 0.02 | 90.98 |
| Limibacter_OTU#242           | 0.00 | 0.06 | 0.00 | 0.00 | 0.02 | 91.00 |
| Paludibacter_OTU#252         | 0.00 | 0.06 | 0.00 | 0.00 | 0.02 | 91.02 |
| Paludibacter_OTU#262         | 0.00 | 0.06 | 0.00 | 0.00 | 0.02 | 91.04 |
| Rikenella_OTU#163            | 0.00 | 0.00 | 0.00 | 0.06 | 0.02 | 91.06 |
| Paludibacter_OTU#296         | 0.00 | 0.06 | 0.00 | 0.00 | 0.02 | 91.09 |
| Tannerella_OTU#355           | 0.05 | 0.00 | 0.00 | 0.02 | 0.02 | 91.11 |
| Sporobacter_OTU#1267         | 0.00 | 0.02 | 0.05 | 0.00 | 0.02 | 91.13 |
| Burkholderia_OTU#939         | 0.00 | 0.00 | 0.05 | 0.02 | 0.02 | 91.15 |
| Ilumatobacter_OTU#1247       | 0.00 | 0.00 | 0.00 | 0.06 | 0.02 | 91.17 |
| Rikenella_OTU#1001           | 0.00 | 0.06 | 0.00 | 0.00 | 0.02 | 91.19 |
| Paludibacter_OTU#1044        | 0.00 | 0.00 | 0.00 | 0.06 | 0.02 | 91.21 |
| Paludibacter_OTU#317         | 0.02 | 0.00 | 0.00 | 0.04 | 0.02 | 91.23 |

Supplementary Table 6

|                                    |      |      |      |      |      |       |
|------------------------------------|------|------|------|------|------|-------|
| Limibacter_OTU#717                 | 0.02 | 0.04 | 0.00 | 0.00 | 0.02 | 91.25 |
| Paludibacter_OTU#88                | 0.05 | 0.00 | 0.03 | 0.00 | 0.02 | 91.27 |
| Xylanibacter_OTU#859               | 0.02 | 0.00 | 0.05 | 0.00 | 0.02 | 91.29 |
| Barnesiella_OTU#451                | 0.02 | 0.00 | 0.00 | 0.04 | 0.02 | 91.31 |
| Parasutterella_OTU#314             | 0.00 | 0.00 | 0.03 | 0.04 | 0.02 | 91.34 |
| Paludibacter_OTU#1040              | 0.00 | 0.00 | 0.03 | 0.04 | 0.02 | 91.36 |
| Paludibacter_OTU#114               | 0.05 | 0.02 | 0.00 | 0.00 | 0.02 | 91.38 |
| Paludibacter_OTU#1205              | 0.00 | 0.02 | 0.05 | 0.00 | 0.02 | 91.40 |
| Paludibacter_OTU#513               | 0.05 | 0.02 | 0.00 | 0.00 | 0.02 | 91.42 |
| Marvinbryantia_OTU#1029            | 0.00 | 0.04 | 0.00 | 0.02 | 0.02 | 91.44 |
| Eubacterium_OTU#564                | 0.00 | 0.04 | 0.03 | 0.00 | 0.01 | 91.46 |
| Paludibacter_OTU#735               | 0.00 | 0.04 | 0.03 | 0.00 | 0.01 | 91.47 |
| Anaerophaga_OTU#87                 | 0.02 | 0.04 | 0.00 | 0.00 | 0.01 | 91.49 |
| Anaerophaga_OTU#181                | 0.00 | 0.02 | 0.00 | 0.04 | 0.01 | 91.51 |
| Barnesiella_OTU#479                | 0.02 | 0.02 | 0.03 | 0.00 | 0.01 | 91.53 |
| Limibacter_OTU#64                  | 0.02 | 0.02 | 0.00 | 0.02 | 0.01 | 91.55 |
| Limibacter_OTU#215                 | 0.02 | 0.02 | 0.00 | 0.02 | 0.01 | 91.57 |
| unclassified_Bacteroidales_OTU#502 | 0.05 | 0.00 | 0.00 | 0.00 | 0.01 | 91.58 |
| Paludibacter_OTU#500               | 0.05 | 0.00 | 0.00 | 0.00 | 0.01 | 91.60 |
| Anaerophaga_OTU#655                | 0.00 | 0.00 | 0.05 | 0.00 | 0.01 | 91.61 |
| Anaerotruncus_OTU#940              | 0.00 | 0.00 | 0.05 | 0.00 | 0.01 | 91.63 |
| Parasporobacterium_OTU#565         | 0.00 | 0.00 | 0.05 | 0.00 | 0.01 | 91.64 |
| Limibacter_OTU#459                 | 0.05 | 0.00 | 0.00 | 0.00 | 0.01 | 91.66 |
| Lachnobacterium_OTU#437            | 0.05 | 0.00 | 0.00 | 0.00 | 0.01 | 91.67 |
| Allobaculum_OTU#103                | 0.05 | 0.00 | 0.00 | 0.00 | 0.01 | 91.69 |
| Paludibacter_OTU#673               | 0.00 | 0.00 | 0.05 | 0.00 | 0.01 | 91.71 |
| Allobaculum_OTU#389                | 0.05 | 0.00 | 0.00 | 0.00 | 0.01 | 91.72 |
| Lachnobacterium_OTU#693            | 0.00 | 0.00 | 0.05 | 0.00 | 0.01 | 91.74 |
| Anaerophaga_OTU#583                | 0.00 | 0.00 | 0.05 | 0.00 | 0.01 | 91.75 |
| Allobaculum_OTU#770                | 0.05 | 0.00 | 0.00 | 0.00 | 0.01 | 91.77 |

Supplementary Table 6

|                                        |      |      |      |      |      |       |
|----------------------------------------|------|------|------|------|------|-------|
| Robinsoniella_OTU#1165                 | 0.00 | 0.00 | 0.05 | 0.00 | 0.01 | 91.78 |
| Marvinbryantia_OTU#592                 | 0.00 | 0.00 | 0.05 | 0.00 | 0.01 | 91.80 |
| Butyrivibrio_OTU#600                   | 0.00 | 0.00 | 0.05 | 0.00 | 0.01 | 91.81 |
| Paludibacter_OTU#1168                  | 0.00 | 0.00 | 0.05 | 0.00 | 0.01 | 91.83 |
| unclassified_Porphyrimonadaceae_OTU#95 | 0.05 | 0.00 | 0.00 | 0.00 | 0.01 | 91.84 |
| Butyricococcus_OTU#642                 | 0.00 | 0.00 | 0.05 | 0.00 | 0.01 | 91.86 |
| Lactobacillus_OTU#613                  | 0.00 | 0.00 | 0.05 | 0.00 | 0.01 | 91.87 |
| unclassified_Bacteroidetes_OTU#388     | 0.05 | 0.00 | 0.00 | 0.00 | 0.01 | 91.89 |
| unclassified_Bacteroidales_OTU#401     | 0.05 | 0.00 | 0.00 | 0.00 | 0.01 | 91.90 |
| Paludibacter_OTU#801                   | 0.05 | 0.00 | 0.00 | 0.00 | 0.01 | 91.92 |
| Allobaculum_OTU#52                     | 0.05 | 0.00 | 0.00 | 0.00 | 0.01 | 91.93 |
| Allobaculum_OTU#13                     | 0.05 | 0.00 | 0.00 | 0.00 | 0.01 | 91.95 |
| Lactobacillus_OTU#621                  | 0.00 | 0.00 | 0.05 | 0.00 | 0.01 | 91.96 |
| Rikenella_OTU#631                      | 0.00 | 0.00 | 0.05 | 0.00 | 0.01 | 91.98 |
| Limibacter_OTU#111                     | 0.05 | 0.00 | 0.00 | 0.00 | 0.01 | 91.99 |
| unclassified_Bacteroidales_OTU#453     | 0.05 | 0.00 | 0.00 | 0.00 | 0.01 | 92.01 |
| unclassified_Bacteria_OTU#463          | 0.05 | 0.00 | 0.00 | 0.00 | 0.01 | 92.02 |
| Robinsoniella_OTU#467                  | 0.05 | 0.00 | 0.00 | 0.00 | 0.01 | 92.04 |
| Paludibacter_OTU#474                   | 0.05 | 0.00 | 0.00 | 0.00 | 0.01 | 92.05 |
| Robinsoniella_OTU#555                  | 0.00 | 0.00 | 0.05 | 0.00 | 0.01 | 92.07 |
| Barnesiella_OTU#532                    | 0.00 | 0.00 | 0.05 | 0.00 | 0.01 | 92.08 |
| Syntrophococcus_OTU#650                | 0.00 | 0.00 | 0.05 | 0.00 | 0.01 | 92.10 |
| unclassified_Bacteroidetes_OTU#520     | 0.05 | 0.00 | 0.00 | 0.00 | 0.01 | 92.11 |
| Robinsoniella_OTU#659                  | 0.00 | 0.00 | 0.05 | 0.00 | 0.01 | 92.13 |
| Allobaculum_OTU#480                    | 0.05 | 0.00 | 0.00 | 0.00 | 0.01 | 92.14 |
| Syntrophococcus_OTU#944                | 0.00 | 0.00 | 0.05 | 0.00 | 0.01 | 92.16 |
| Paludibacter_OTU#450                   | 0.05 | 0.00 | 0.00 | 0.00 | 0.01 | 92.17 |
| Marvinbryantia_OTU#888                 | 0.00 | 0.00 | 0.05 | 0.00 | 0.01 | 92.19 |
| unclassified_Lachnospiraceae_OTU#869   | 0.00 | 0.00 | 0.05 | 0.00 | 0.01 | 92.20 |
| Barnesiella_OTU#832                    | 0.05 | 0.00 | 0.00 | 0.00 | 0.01 | 92.22 |

Supplementary Table 6

|                                     |      |      |      |      |      |       |
|-------------------------------------|------|------|------|------|------|-------|
| Robinsoniella_OTU#1287              | 0.00 | 0.00 | 0.05 | 0.00 | 0.01 | 92.23 |
| Lachnobacterium_OTU#777             | 0.05 | 0.00 | 0.00 | 0.00 | 0.01 | 92.25 |
| Paludibacter_OTU#1176               | 0.00 | 0.00 | 0.05 | 0.00 | 0.01 | 92.26 |
| Butyrivibrio_OTU#688                | 0.00 | 0.00 | 0.05 | 0.00 | 0.01 | 92.28 |
| Allobaculum_OTU#85                  | 0.05 | 0.00 | 0.00 | 0.00 | 0.01 | 92.30 |
| unclassified_Clostridiales_OTU#670  | 0.00 | 0.00 | 0.05 | 0.00 | 0.01 | 92.31 |
| Allobaculum_OTU#6                   | 0.05 | 0.00 | 0.00 | 0.00 | 0.01 | 92.33 |
| Paludibacter_OTU#664                | 0.00 | 0.00 | 0.05 | 0.00 | 0.01 | 92.34 |
| Lachnobacterium_OTU#617             | 0.00 | 0.00 | 0.05 | 0.00 | 0.01 | 92.36 |
| Anaerophaga_OTU#395                 | 0.05 | 0.00 | 0.00 | 0.00 | 0.01 | 92.37 |
| Robinsoniella_OTU#615               | 0.00 | 0.00 | 0.05 | 0.00 | 0.01 | 92.39 |
| Paludibacter_OTU#815                | 0.05 | 0.00 | 0.00 | 0.00 | 0.01 | 92.40 |
| Limibacter_OTU#811                  | 0.05 | 0.00 | 0.00 | 0.00 | 0.01 | 92.42 |
| Hydrogenoanaerobacterium_OTU#573    | 0.00 | 0.00 | 0.05 | 0.00 | 0.01 | 92.43 |
| unclassified_Bacteroidales_OTU#1259 | 0.00 | 0.00 | 0.05 | 0.00 | 0.01 | 92.45 |
| Marvinbryantia_OTU#870              | 0.00 | 0.00 | 0.05 | 0.00 | 0.01 | 92.46 |
| Paludibacter_OTU#1272               | 0.00 | 0.00 | 0.05 | 0.00 | 0.01 | 92.48 |
| Anaerophaga_OTU#1270                | 0.00 | 0.00 | 0.05 | 0.00 | 0.01 | 92.49 |
| Marvinbryantia_OTU#602              | 0.00 | 0.00 | 0.05 | 0.00 | 0.01 | 92.51 |
| Helicobacter_OTU#37                 | 0.05 | 0.00 | 0.00 | 0.00 | 0.01 | 92.52 |
| Pseudoxanthomonas_OTU#892           | 0.00 | 0.00 | 0.05 | 0.00 | 0.01 | 92.54 |
| Peptococcus_OTU#982                 | 0.00 | 0.00 | 0.05 | 0.00 | 0.01 | 92.55 |
| Dorea_OTU#1144                      | 0.00 | 0.00 | 0.05 | 0.00 | 0.01 | 92.57 |
| Allobaculum_OTU#1076                | 0.05 | 0.00 | 0.00 | 0.00 | 0.01 | 92.58 |
| Lachnobacterium_OTU#1064            | 0.05 | 0.00 | 0.00 | 0.00 | 0.01 | 92.60 |
| Smithella_OTU#1054                  | 0.05 | 0.00 | 0.00 | 0.00 | 0.01 | 92.61 |
| unclassified_TM7_OTU#525            | 0.00 | 0.00 | 0.05 | 0.00 | 0.01 | 92.63 |
| Parasutterella_OTU#254              | 0.00 | 0.04 | 0.00 | 0.00 | 0.01 | 92.64 |
| Tannerella_OTU#1008                 | 0.00 | 0.04 | 0.00 | 0.00 | 0.01 | 92.66 |
| Helicobacter_OTU#1005               | 0.00 | 0.04 | 0.00 | 0.00 | 0.01 | 92.67 |

Supplementary Table 6



|                                    |      |      |      |      |      |       |
|------------------------------------|------|------|------|------|------|-------|
| Limibacter_OTU#137                 | 0.00 | 0.00 | 0.00 | 0.04 | 0.01 | 92.68 |
| Paludibacter_OTU#237               | 0.00 | 0.04 | 0.00 | 0.00 | 0.01 | 92.70 |
| Paludibacter_OTU#7                 | 0.02 | 0.00 | 0.03 | 0.00 | 0.01 | 92.71 |
| Parasutterella_OTU#274             | 0.00 | 0.04 | 0.00 | 0.00 | 0.01 | 92.73 |
| Limibacter_OTU#400                 | 0.02 | 0.00 | 0.03 | 0.00 | 0.01 | 92.74 |
| Paludibacter_OTU#797               | 0.02 | 0.00 | 0.03 | 0.00 | 0.01 | 92.75 |
| Bacteroides_OTU#362                | 0.00 | 0.00 | 0.00 | 0.04 | 0.01 | 92.77 |
| Paludibacter_OTU#738               | 0.00 | 0.04 | 0.00 | 0.00 | 0.01 | 92.78 |
| Paludibacter_OTU#346               | 0.00 | 0.00 | 0.00 | 0.04 | 0.01 | 92.80 |
| unclassified_Bacteroidales_OTU#690 | 0.02 | 0.00 | 0.03 | 0.00 | 0.01 | 92.81 |
| Limibacter_OTU#293                 | 0.00 | 0.04 | 0.00 | 0.00 | 0.01 | 92.82 |
| Akkermansia_OTU#780                | 0.02 | 0.00 | 0.03 | 0.00 | 0.01 | 92.84 |
| Paludibacter_OTU#204               | 0.00 | 0.00 | 0.00 | 0.04 | 0.01 | 92.85 |
| Paludibacter_OTU#831               | 0.02 | 0.00 | 0.03 | 0.00 | 0.01 | 92.87 |
| unclassified_Bacteroidales_OTU#863 | 0.02 | 0.00 | 0.03 | 0.00 | 0.01 | 92.88 |
| Anaerotruncus_OTU#1126             | 0.02 | 0.00 | 0.03 | 0.00 | 0.01 | 92.89 |
| unclassified_Bacteroidetes_OTU#150 | 0.00 | 0.00 | 0.00 | 0.04 | 0.01 | 92.91 |
| Barnesiella_OTU#460                | 0.02 | 0.00 | 0.03 | 0.00 | 0.01 | 92.92 |
| Paludibacter_OTU#147               | 0.00 | 0.00 | 0.00 | 0.04 | 0.01 | 92.94 |
| Marvinbryantia_OTU#943             | 0.02 | 0.00 | 0.03 | 0.00 | 0.01 | 92.95 |
| Enterorhabdus_OTU#288              | 0.00 | 0.04 | 0.00 | 0.00 | 0.01 | 92.97 |
| Limibacter_OTU#249                 | 0.00 | 0.04 | 0.00 | 0.00 | 0.01 | 92.98 |
| Paludibacter_OTU#1019              | 0.00 | 0.04 | 0.00 | 0.00 | 0.01 | 92.99 |
| Limibacter_OTU#267                 | 0.00 | 0.04 | 0.00 | 0.00 | 0.01 | 93.01 |
| Paludibacter_OTU#135               | 0.00 | 0.00 | 0.00 | 0.04 | 0.01 | 93.02 |
| Enterococcus_OTU#1037              | 0.00 | 0.00 | 0.00 | 0.04 | 0.01 | 93.04 |
| Paludibacter_OTU#1025              | 0.00 | 0.04 | 0.00 | 0.00 | 0.01 | 93.05 |
| Paludibacter_OTU#999               | 0.00 | 0.04 | 0.00 | 0.00 | 0.01 | 93.06 |
| Limibacter_OTU#192                 | 0.00 | 0.00 | 0.00 | 0.04 | 0.01 | 93.08 |
| Rikenella_OTU#740                  | 0.00 | 0.04 | 0.00 | 0.00 | 0.01 | 93.09 |

Supplementary Table 6

|                                          |      |      |      |      |      |       |
|------------------------------------------|------|------|------|------|------|-------|
| Anaerophaga_OTU#369                      | 0.00 | 0.00 | 0.00 | 0.04 | 0.01 | 93.11 |
| unclassified_Porphyrromonadaceae_OTU#350 | 0.00 | 0.00 | 0.00 | 0.04 | 0.01 | 93.12 |
| Allobaculum_OTU#1242                     | 0.00 | 0.00 | 0.00 | 0.04 | 0.01 | 93.13 |
| Tumebacillus_OTU#1248                    | 0.00 | 0.00 | 0.00 | 0.04 | 0.01 | 93.15 |
| unclassified_Bacteroidetes_OTU#309       | 0.00 | 0.04 | 0.00 | 0.00 | 0.01 | 93.16 |
| Paludibacter_OTU#1232                    | 0.00 | 0.04 | 0.00 | 0.00 | 0.01 | 93.18 |
| Barnesiella_OTU#259                      | 0.00 | 0.04 | 0.00 | 0.00 | 0.01 | 93.19 |
| unclassified_Bacteroidales_OTU#1107      | 0.02 | 0.02 | 0.00 | 0.00 | 0.01 | 93.20 |
| Mesorhizobium_OTU#921                    | 0.00 | 0.00 | 0.03 | 0.02 | 0.01 | 93.22 |
| Helicobacter_OTU#865                     | 0.02 | 0.02 | 0.00 | 0.00 | 0.01 | 93.23 |
| unclassified_Porphyrromonadaceae_OTU#418 | 0.02 | 0.02 | 0.00 | 0.00 | 0.01 | 93.24 |
| Tannerella_OTU#194                       | 0.02 | 0.00 | 0.00 | 0.02 | 0.01 | 93.26 |
| Barnesiella_OTU#190                      | 0.00 | 0.00 | 0.03 | 0.02 | 0.01 | 93.27 |
| Enterorhabdus_OTU#750                    | 0.00 | 0.02 | 0.03 | 0.00 | 0.01 | 93.28 |
| unclassified_Bacteroidetes_OTU#749       | 0.00 | 0.02 | 0.03 | 0.00 | 0.01 | 93.30 |
| Barnesiella_OTU#287                      | 0.02 | 0.02 | 0.00 | 0.00 | 0.01 | 93.31 |
| Limibacter_OTU#357                       | 0.00 | 0.00 | 0.03 | 0.02 | 0.01 | 93.33 |
| Paludibacter_OTU#712                     | 0.02 | 0.02 | 0.00 | 0.00 | 0.01 | 93.34 |
| Paludibacter_OTU#1210                    | 0.00 | 0.02 | 0.03 | 0.00 | 0.01 | 93.35 |
| Dorea_OTU#375                            | 0.00 | 0.00 | 0.03 | 0.02 | 0.01 | 93.37 |
| Achromobacter_OTU#696                    | 0.00 | 0.00 | 0.03 | 0.02 | 0.01 | 93.38 |
| Limibacter_OTU#174                       | 0.02 | 0.00 | 0.00 | 0.02 | 0.01 | 93.39 |
| Limibacter_OTU#342                       | 0.00 | 0.00 | 0.03 | 0.02 | 0.01 | 93.41 |
| Anaerophaga_OTU#774                      | 0.02 | 0.02 | 0.00 | 0.00 | 0.01 | 93.42 |
| Anaerophaga_OTU#337                      | 0.00 | 0.00 | 0.03 | 0.02 | 0.01 | 93.43 |
| Barnesiella_OTU#336                      | 0.00 | 0.00 | 0.03 | 0.02 | 0.01 | 93.45 |
| Rikenella_OTU#821                        | 0.02 | 0.02 | 0.00 | 0.00 | 0.01 | 93.46 |
| Paludibacter_OTU#423                     | 0.02 | 0.00 | 0.00 | 0.02 | 0.01 | 93.47 |
| Anaerophaga_OTU#318                      | 0.00 | 0.00 | 0.03 | 0.02 | 0.01 | 93.49 |
| Helicobacter_OTU#852                     | 0.02 | 0.02 | 0.00 | 0.00 | 0.01 | 93.50 |

Supplementary Table 6

|                                    |      |      |      |      |      |       |
|------------------------------------|------|------|------|------|------|-------|
| Paludibacter_OTU#79                | 0.02 | 0.00 | 0.00 | 0.02 | 0.01 | 93.51 |
| unclassified_Bacteroidales_OTU#430 | 0.02 | 0.02 | 0.00 | 0.00 | 0.01 | 93.53 |
| unclassified_Bacteroidales_OTU#312 | 0.00 | 0.02 | 0.03 | 0.00 | 0.01 | 93.54 |
| unclassified_Bacteroidales_OTU#217 | 0.00 | 0.00 | 0.03 | 0.02 | 0.01 | 93.55 |
| Paludibacter_OTU#159               | 0.00 | 0.00 | 0.03 | 0.02 | 0.01 | 93.57 |
| Limibacter_OTU#1229                | 0.00 | 0.02 | 0.03 | 0.00 | 0.01 | 93.58 |
| Blautia_OTU#951                    | 0.00 | 0.02 | 0.03 | 0.00 | 0.01 | 93.60 |
| Pseudozobellia_OTU#320             | 0.02 | 0.00 | 0.00 | 0.02 | 0.01 | 93.61 |
| Stenotrophomonas_OTU#977           | 0.00 | 0.00 | 0.03 | 0.02 | 0.01 | 93.62 |
| Rikenella_OTU#280                  | 0.02 | 0.02 | 0.00 | 0.00 | 0.01 | 93.64 |
| Paludibacter_OTU#265               | 0.02 | 0.02 | 0.00 | 0.00 | 0.01 | 93.65 |
| Limibacter_OTU#482                 | 0.02 | 0.02 | 0.00 | 0.00 | 0.01 | 93.66 |
| Helicobacter_OTU#81                | 0.02 | 0.02 | 0.00 | 0.00 | 0.01 | 93.68 |
| Barnesiella_OTU#377                | 0.00 | 0.02 | 0.00 | 0.02 | 0.01 | 93.69 |
| Limibacter_OTU#376                 | 0.00 | 0.02 | 0.00 | 0.02 | 0.01 | 93.70 |
| Paludibacter_OTU#186               | 0.00 | 0.02 | 0.00 | 0.02 | 0.01 | 93.72 |
| Rikenella_OTU#734                  | 0.00 | 0.02 | 0.00 | 0.02 | 0.01 | 93.73 |
| Barnesiella_OTU#366                | 0.00 | 0.02 | 0.00 | 0.02 | 0.01 | 93.74 |
| Paludibacter_OTU#344               | 0.00 | 0.02 | 0.00 | 0.02 | 0.01 | 93.75 |
| Paludibacter_OTU#338               | 0.00 | 0.02 | 0.00 | 0.02 | 0.01 | 93.77 |
| Paludibacter_OTU#321               | 0.00 | 0.02 | 0.00 | 0.02 | 0.01 | 93.78 |
| Tannerella_OTU#292                 | 0.00 | 0.02 | 0.00 | 0.02 | 0.01 | 93.79 |
| Rikenella_OTU#1042                 | 0.00 | 0.02 | 0.00 | 0.02 | 0.01 | 93.81 |
| Limibacter_OTU#164                 | 0.00 | 0.02 | 0.00 | 0.02 | 0.01 | 93.82 |
| Paludibacter_OTU#326               | 0.00 | 0.02 | 0.00 | 0.02 | 0.01 | 93.83 |
| Marvinbryantia_OTU#510             | 0.02 | 0.00 | 0.00 | 0.00 | 0.01 | 93.84 |
| Limibacter_OTU#509                 | 0.02 | 0.00 | 0.00 | 0.00 | 0.01 | 93.85 |
| Allobaculum_OTU#508                | 0.02 | 0.00 | 0.00 | 0.00 | 0.01 | 93.85 |
| Sharpea_OTU#1109                   | 0.02 | 0.00 | 0.00 | 0.00 | 0.01 | 93.86 |
| Pseudozobellia_OTU#505             | 0.02 | 0.00 | 0.00 | 0.00 | 0.01 | 93.87 |

Supplementary Table 6

|                          |      |      |      |      |      |       |
|--------------------------|------|------|------|------|------|-------|
| Barnesiella_OTU#63       | 0.02 | 0.00 | 0.00 | 0.00 | 0.01 | 93.88 |
| Allobaculum_OTU#504      | 0.02 | 0.00 | 0.00 | 0.00 | 0.01 | 93.88 |
| Limibacter_OTU#1099      | 0.02 | 0.00 | 0.00 | 0.00 | 0.01 | 93.89 |
| Paludibacter_OTU#1119    | 0.02 | 0.00 | 0.00 | 0.00 | 0.01 | 93.90 |
| Aquiflexum_OTU#1118      | 0.02 | 0.00 | 0.00 | 0.00 | 0.01 | 93.91 |
| Limibacter_OTU#1111      | 0.02 | 0.00 | 0.00 | 0.00 | 0.01 | 93.92 |
| Paludibacter_OTU#507     | 0.02 | 0.00 | 0.00 | 0.00 | 0.01 | 93.92 |
| Paludibacter_OTU#1115    | 0.02 | 0.00 | 0.00 | 0.00 | 0.01 | 93.93 |
| Marvinbryantia_OTU#996   | 0.00 | 0.00 | 0.03 | 0.00 | 0.01 | 93.94 |
| Paludibacter_OTU#498     | 0.02 | 0.00 | 0.00 | 0.00 | 0.01 | 93.95 |
| Lachnobacterium_OTU#1102 | 0.02 | 0.00 | 0.00 | 0.00 | 0.01 | 93.95 |
| Paludibacter_OTU#497     | 0.02 | 0.00 | 0.00 | 0.00 | 0.01 | 93.96 |
| Marvinbryantia_OTU#992   | 0.00 | 0.00 | 0.03 | 0.00 | 0.01 | 93.97 |
| Paludibacter_OTU#496     | 0.02 | 0.00 | 0.00 | 0.00 | 0.01 | 93.98 |
| Parasutterella_OTU#31    | 0.02 | 0.00 | 0.00 | 0.00 | 0.01 | 93.98 |
| Limibacter_OTU#1114      | 0.02 | 0.00 | 0.00 | 0.00 | 0.01 | 93.99 |
| Marvinbryantia_OTU#1098  | 0.02 | 0.00 | 0.00 | 0.00 | 0.01 | 94.00 |
| Howardella_OTU#990       | 0.00 | 0.00 | 0.03 | 0.00 | 0.01 | 94.01 |
| Marvinbryantia_OTU#988   | 0.00 | 0.00 | 0.03 | 0.00 | 0.01 | 94.01 |
| Butyricoccus_OTU#986     | 0.00 | 0.00 | 0.03 | 0.00 | 0.01 | 94.02 |
| Parasutterella_OTU#493   | 0.02 | 0.00 | 0.00 | 0.00 | 0.01 | 94.03 |
| Marvinbryantia_OTU#985   | 0.00 | 0.00 | 0.03 | 0.00 | 0.01 | 94.04 |
| Howardella_OTU#983       | 0.00 | 0.00 | 0.03 | 0.00 | 0.01 | 94.04 |
| Butyricoccus_OTU#980     | 0.00 | 0.00 | 0.03 | 0.00 | 0.01 | 94.05 |
| Hallella_OTU#490         | 0.02 | 0.00 | 0.00 | 0.00 | 0.01 | 94.06 |
| Parasutterella_OTU#489   | 0.02 | 0.00 | 0.00 | 0.00 | 0.01 | 94.07 |
| Butyricoccus_OTU#976     | 0.00 | 0.00 | 0.03 | 0.00 | 0.01 | 94.07 |
| Limibacter_OTU#488       | 0.02 | 0.00 | 0.00 | 0.00 | 0.01 | 94.08 |
| Paludibacter_OTU#61      | 0.02 | 0.00 | 0.00 | 0.00 | 0.01 | 94.09 |
| Paludibacter_OTU#1122    | 0.02 | 0.00 | 0.00 | 0.00 | 0.01 | 94.10 |

Supplementary Table 6

|                            |      |      |      |      |      |       |
|----------------------------|------|------|------|------|------|-------|
| Pseudozobellia_OTU#487     | 0.02 | 0.00 | 0.00 | 0.00 | 0.01 | 94.10 |
| Dorea_OTU#972              | 0.00 | 0.00 | 0.03 | 0.00 | 0.01 | 94.11 |
| Kordia_OTU#486             | 0.02 | 0.00 | 0.00 | 0.00 | 0.01 | 94.12 |
| Robinsoniella_OTU#970      | 0.00 | 0.00 | 0.03 | 0.00 | 0.01 | 94.13 |
| Dorea_OTU#969              | 0.00 | 0.00 | 0.03 | 0.00 | 0.01 | 94.13 |
| Desulfobotulus_OTU#968     | 0.00 | 0.00 | 0.03 | 0.00 | 0.01 | 94.14 |
| Tannerella_OTU#484         | 0.02 | 0.00 | 0.00 | 0.00 | 0.01 | 94.15 |
| Limibacter_OTU#483         | 0.02 | 0.00 | 0.00 | 0.00 | 0.01 | 94.16 |
| Marvinbryantia_OTU#965     | 0.00 | 0.00 | 0.03 | 0.00 | 0.01 | 94.16 |
| Allobaculum_OTU#30         | 0.02 | 0.00 | 0.00 | 0.00 | 0.01 | 94.17 |
| Parasporobacterium_OTU#963 | 0.00 | 0.00 | 0.03 | 0.00 | 0.01 | 94.18 |
| Rikenella_OTU#962          | 0.00 | 0.00 | 0.03 | 0.00 | 0.01 | 94.19 |
| Anaerophaga_OTU#961        | 0.00 | 0.00 | 0.03 | 0.00 | 0.01 | 94.20 |
| Coprococcus_OTU#960        | 0.00 | 0.00 | 0.03 | 0.00 | 0.01 | 94.20 |
| Marvinbryantia_OTU#1123    | 0.02 | 0.00 | 0.00 | 0.00 | 0.01 | 94.21 |
| Allobaculum_OTU#958        | 0.00 | 0.00 | 0.03 | 0.00 | 0.01 | 94.22 |
| Acetitomaculum_OTU#956     | 0.00 | 0.00 | 0.03 | 0.00 | 0.01 | 94.23 |
| Rikenella_OTU#478          | 0.02 | 0.00 | 0.00 | 0.00 | 0.01 | 94.23 |
| Pseudozobellia_OTU#477     | 0.02 | 0.00 | 0.00 | 0.00 | 0.01 | 94.24 |
| Roseburia_OTU#952          | 0.00 | 0.00 | 0.03 | 0.00 | 0.01 | 94.25 |
| Allobaculum_OTU#476        | 0.02 | 0.00 | 0.00 | 0.00 | 0.01 | 94.26 |
| Helicobacter_OTU#59        | 0.02 | 0.00 | 0.00 | 0.00 | 0.01 | 94.26 |
| Allobaculum_OTU#475        | 0.02 | 0.00 | 0.00 | 0.00 | 0.01 | 94.27 |
| Robinsoniella_OTU#949      | 0.00 | 0.00 | 0.03 | 0.00 | 0.01 | 94.28 |
| Paludibacter_OTU#947       | 0.00 | 0.00 | 0.03 | 0.00 | 0.01 | 94.29 |
| Paludibacter_OTU#473       | 0.02 | 0.00 | 0.00 | 0.00 | 0.01 | 94.29 |
| Tannerella_OTU#472         | 0.02 | 0.00 | 0.00 | 0.00 | 0.01 | 94.30 |
| Lawsonia_OTU#942           | 0.00 | 0.00 | 0.03 | 0.00 | 0.01 | 94.31 |
| Atopobacter_OTU#470        | 0.02 | 0.00 | 0.00 | 0.00 | 0.01 | 94.32 |
| Paludibacter_OTU#469       | 0.02 | 0.00 | 0.00 | 0.00 | 0.01 | 94.32 |

Supplementary Table 6

|                             |      |      |      |      |      |       |
|-----------------------------|------|------|------|------|------|-------|
| Catonella_OTU#937           | 0.00 | 0.00 | 0.03 | 0.00 | 0.01 | 94.33 |
| Paludibacter_OTU#468        | 0.02 | 0.00 | 0.00 | 0.00 | 0.01 | 94.34 |
| Lachnobacterium_OTU#934     | 0.00 | 0.00 | 0.03 | 0.00 | 0.01 | 94.35 |
| Butyrivibrio_OTU#932        | 0.00 | 0.00 | 0.03 | 0.00 | 0.01 | 94.35 |
| Limibacter_OTU#466          | 0.02 | 0.00 | 0.00 | 0.00 | 0.01 | 94.36 |
| Butyrivibrio_OTU#931        | 0.00 | 0.00 | 0.03 | 0.00 | 0.01 | 94.37 |
| Robinsoniella_OTU#929       | 0.00 | 0.00 | 0.03 | 0.00 | 0.01 | 94.38 |
| Blautia_OTU#928             | 0.00 | 0.00 | 0.03 | 0.00 | 0.01 | 94.38 |
| Anaerophaga_OTU#464         | 0.02 | 0.00 | 0.00 | 0.00 | 0.01 | 94.39 |
| Parasporobacterium_OTU#1127 | 0.02 | 0.00 | 0.00 | 0.00 | 0.01 | 94.40 |
| Parasporobacterium_OTU#926  | 0.00 | 0.00 | 0.03 | 0.00 | 0.01 | 94.41 |
| Lachnobacterium_OTU#925     | 0.00 | 0.00 | 0.03 | 0.00 | 0.01 | 94.41 |
| Oscillibacter_OTU#462       | 0.02 | 0.00 | 0.00 | 0.00 | 0.01 | 94.42 |
| Barnesiella_OTU#923         | 0.00 | 0.00 | 0.03 | 0.00 | 0.01 | 94.43 |
| Blautia_OTU#922             | 0.00 | 0.00 | 0.03 | 0.00 | 0.01 | 94.44 |
| Barnesiella_OTU#920         | 0.00 | 0.00 | 0.03 | 0.00 | 0.01 | 94.44 |
| Robinsoniella_OTU#917       | 0.00 | 0.00 | 0.03 | 0.00 | 0.01 | 94.45 |
| Paludibacter_OTU#457        | 0.02 | 0.00 | 0.00 | 0.00 | 0.01 | 94.46 |
| Chlorophyta_OTU#913         | 0.00 | 0.00 | 0.03 | 0.00 | 0.01 | 94.47 |
| Anaerophaga_OTU#456         | 0.02 | 0.00 | 0.00 | 0.00 | 0.01 | 94.47 |
| Butyricoccus_OTU#28         | 0.02 | 0.00 | 0.00 | 0.00 | 0.01 | 94.48 |
| Paludibacter_OTU#455        | 0.02 | 0.00 | 0.00 | 0.00 | 0.01 | 94.49 |
| Dorea_OTU#908               | 0.00 | 0.00 | 0.03 | 0.00 | 0.01 | 94.50 |
| Barnesiella_OTU#454         | 0.02 | 0.00 | 0.00 | 0.00 | 0.01 | 94.51 |
| Ruminococcus_OTU#906        | 0.00 | 0.00 | 0.03 | 0.00 | 0.01 | 94.51 |
| Eggerthella_OTU#904         | 0.00 | 0.00 | 0.03 | 0.00 | 0.01 | 94.52 |
| Paludibacter_OTU#452        | 0.02 | 0.00 | 0.00 | 0.00 | 0.01 | 94.53 |
| Paludibacter_OTU#113        | 0.02 | 0.00 | 0.00 | 0.00 | 0.01 | 94.54 |
| Robinsoniella_OTU#902       | 0.00 | 0.00 | 0.03 | 0.00 | 0.01 | 94.54 |
| Paludibacter_OTU#901        | 0.00 | 0.00 | 0.03 | 0.00 | 0.01 | 94.55 |

Supplementary Table 6

|                        |      |      |      |      |      |       |
|------------------------|------|------|------|------|------|-------|
| Robinsoniella_OTU#899  | 0.00 | 0.00 | 0.03 | 0.00 | 0.01 | 94.56 |
| Robinsoniella_OTU#898  | 0.00 | 0.00 | 0.03 | 0.00 | 0.01 | 94.57 |
| Paludibacter_OTU#897   | 0.00 | 0.00 | 0.03 | 0.00 | 0.01 | 94.57 |
| Marvinbryantia_OTU#896 | 0.00 | 0.00 | 0.03 | 0.00 | 0.01 | 94.58 |
| Aquiflexum_OTU#448     | 0.02 | 0.00 | 0.00 | 0.00 | 0.01 | 94.59 |
| Barnesiella_OTU#1131   | 0.00 | 0.00 | 0.03 | 0.00 | 0.01 | 94.60 |
| Paludibacter_OTU#447   | 0.02 | 0.00 | 0.00 | 0.00 | 0.01 | 94.60 |
| Tannerella_OTU#446     | 0.02 | 0.00 | 0.00 | 0.00 | 0.01 | 94.61 |
| Marinifilum_OTU#55     | 0.02 | 0.00 | 0.00 | 0.00 | 0.01 | 94.62 |
| Limibacter_OTU#445     | 0.02 | 0.00 | 0.00 | 0.00 | 0.01 | 94.63 |
| Roseburia_OTU#889      | 0.00 | 0.00 | 0.03 | 0.00 | 0.01 | 94.63 |
| Parasutterella_OTU#444 | 0.02 | 0.00 | 0.00 | 0.00 | 0.01 | 94.64 |
| Dorea_OTU#886          | 0.00 | 0.00 | 0.03 | 0.00 | 0.01 | 94.65 |
| Peptococcus_OTU#885    | 0.00 | 0.00 | 0.03 | 0.00 | 0.01 | 94.66 |
| Paludibacter_OTU#442   | 0.02 | 0.00 | 0.00 | 0.00 | 0.01 | 94.66 |
| Paludibacter_OTU#441   | 0.02 | 0.00 | 0.00 | 0.00 | 0.01 | 94.67 |
| Howardella_OTU#881     | 0.00 | 0.00 | 0.03 | 0.00 | 0.01 | 94.68 |
| Marvinbryantia_OTU#880 | 0.00 | 0.00 | 0.03 | 0.00 | 0.01 | 94.69 |
| Allobaculum_OTU#440    | 0.02 | 0.00 | 0.00 | 0.00 | 0.01 | 94.69 |
| Coproccoccus_OTU#1135  | 0.00 | 0.00 | 0.03 | 0.00 | 0.01 | 94.70 |
| Paludibacter_OTU#439   | 0.02 | 0.00 | 0.00 | 0.00 | 0.01 | 94.71 |
| Dorea_OTU#876          | 0.00 | 0.00 | 0.03 | 0.00 | 0.01 | 94.72 |
| Bulleidia_OTU#109      | 0.02 | 0.00 | 0.00 | 0.00 | 0.01 | 94.72 |
| Oscillibacter_OTU#873  | 0.00 | 0.00 | 0.03 | 0.00 | 0.01 | 94.73 |
| Barnesiella_OTU#436    | 0.02 | 0.00 | 0.00 | 0.00 | 0.01 | 94.74 |
| Allobaculum_OTU#27     | 0.02 | 0.00 | 0.00 | 0.00 | 0.01 | 94.75 |
| Sporobacterium_OTU#871 | 0.00 | 0.00 | 0.03 | 0.00 | 0.01 | 94.75 |
| Tannerella_OTU#435     | 0.02 | 0.00 | 0.00 | 0.00 | 0.01 | 94.76 |
| Limibacter_OTU#866     | 0.02 | 0.00 | 0.00 | 0.00 | 0.01 | 94.77 |
| Pseudozobellia_OTU#864 | 0.02 | 0.00 | 0.00 | 0.00 | 0.01 | 94.78 |

Supplementary Table 6

|                                  |      |      |      |      |      |       |
|----------------------------------|------|------|------|------|------|-------|
| Paludibacter_OTU#432             | 0.02 | 0.00 | 0.00 | 0.00 | 0.01 | 94.79 |
| Robinsoniella_OTU#1137           | 0.00 | 0.00 | 0.03 | 0.00 | 0.01 | 94.79 |
| Limibacter_OTU#1134              | 0.00 | 0.00 | 0.03 | 0.00 | 0.01 | 94.80 |
| Anaerophaga_OTU#431              | 0.02 | 0.00 | 0.00 | 0.00 | 0.01 | 94.81 |
| Hydrogenoanaerobacterium_OTU#861 | 0.02 | 0.00 | 0.00 | 0.00 | 0.01 | 94.82 |
| Anaerophaga_OTU#860              | 0.02 | 0.00 | 0.00 | 0.00 | 0.01 | 94.82 |
| Limibacter_OTU#858               | 0.02 | 0.00 | 0.00 | 0.00 | 0.01 | 94.83 |
| Allobaculum_OTU#857              | 0.02 | 0.00 | 0.00 | 0.00 | 0.01 | 94.84 |
| Papillibacter_OTU#856            | 0.02 | 0.00 | 0.00 | 0.00 | 0.01 | 94.85 |
| Paludibacter_OTU#428             | 0.02 | 0.00 | 0.00 | 0.00 | 0.01 | 94.85 |
| Anaerophaga_OTU#427              | 0.02 | 0.00 | 0.00 | 0.00 | 0.01 | 94.86 |
| Barnesiella_OTU#853              | 0.02 | 0.00 | 0.00 | 0.00 | 0.01 | 94.87 |
| Lactobacillus_OTU#426            | 0.02 | 0.00 | 0.00 | 0.00 | 0.01 | 94.88 |
| Paludibacter_OTU#850             | 0.02 | 0.00 | 0.00 | 0.00 | 0.01 | 94.88 |
| Paludibacter_OTU#425             | 0.02 | 0.00 | 0.00 | 0.00 | 0.01 | 94.89 |
| Paludibacter_OTU#849             | 0.02 | 0.00 | 0.00 | 0.00 | 0.01 | 94.90 |
| Paludibacter_OTU#848             | 0.02 | 0.00 | 0.00 | 0.00 | 0.01 | 94.91 |
| Anaerophaga_OTU#846              | 0.02 | 0.00 | 0.00 | 0.00 | 0.01 | 94.91 |
| Paludibacter_OTU#844             | 0.02 | 0.00 | 0.00 | 0.00 | 0.01 | 94.92 |
| Allobaculum_OTU#422              | 0.02 | 0.00 | 0.00 | 0.00 | 0.01 | 94.93 |
| Paludibacter_OTU#842             | 0.02 | 0.00 | 0.00 | 0.00 | 0.01 | 94.94 |
| Nubsella_OTU#841                 | 0.02 | 0.00 | 0.00 | 0.00 | 0.01 | 94.94 |
| Aquiflexum_OTU#840               | 0.02 | 0.00 | 0.00 | 0.00 | 0.01 | 94.95 |
| Paludibacter_OTU#420             | 0.02 | 0.00 | 0.00 | 0.00 | 0.01 | 94.96 |
| Paludibacter_OTU#838             | 0.02 | 0.00 | 0.00 | 0.00 | 0.01 | 94.97 |
| Allobaculum_OTU#837              | 0.02 | 0.00 | 0.00 | 0.00 | 0.01 | 94.97 |
| Anaerophaga_OTU#835              | 0.02 | 0.00 | 0.00 | 0.00 | 0.01 | 94.98 |
| Limibacter_OTU#834               | 0.02 | 0.00 | 0.00 | 0.00 | 0.01 | 94.99 |
| Anaerophaga_OTU#417              | 0.02 | 0.00 | 0.00 | 0.00 | 0.01 | 95.00 |
| Limibacter_OTU#833               | 0.02 | 0.00 | 0.00 | 0.00 | 0.01 | 95.00 |

Supplementary Table 6



|                         |      |      |      |      |      |       |
|-------------------------|------|------|------|------|------|-------|
| Oscillibacter_OTU#1138  | 0.00 | 0.00 | 0.03 | 0.00 | 0.01 | 95.01 |
| Paludibacter_OTU#415    | 0.02 | 0.00 | 0.00 | 0.00 | 0.01 | 95.02 |
| Tannerella_OTU#829      | 0.02 | 0.00 | 0.00 | 0.00 | 0.01 | 95.03 |
| Anaerophaga_OTU#828     | 0.02 | 0.00 | 0.00 | 0.00 | 0.01 | 95.03 |
| Allobaculum_OTU#413     | 0.02 | 0.00 | 0.00 | 0.00 | 0.01 | 95.04 |
| Lachnobacterium_OTU#825 | 0.02 | 0.00 | 0.00 | 0.00 | 0.01 | 95.05 |
| Barnesiella_OTU#412     | 0.02 | 0.00 | 0.00 | 0.00 | 0.01 | 95.06 |
| Barnesiella_OTU#411     | 0.02 | 0.00 | 0.00 | 0.00 | 0.01 | 95.07 |
| Anaerophaga_OTU#820     | 0.02 | 0.00 | 0.00 | 0.00 | 0.01 | 95.07 |
| Barnesiella_OTU#410     | 0.02 | 0.00 | 0.00 | 0.00 | 0.01 | 95.08 |
| Lachnobacterium_OTU#818 | 0.02 | 0.00 | 0.00 | 0.00 | 0.01 | 95.09 |
| Barnesiella_OTU#817     | 0.02 | 0.00 | 0.00 | 0.00 | 0.01 | 95.10 |
| Paludibacter_OTU#816    | 0.02 | 0.00 | 0.00 | 0.00 | 0.01 | 95.10 |
| Allobaculum_OTU#51      | 0.02 | 0.00 | 0.00 | 0.00 | 0.01 | 95.11 |
| Limibacter_OTU#1141     | 0.00 | 0.00 | 0.03 | 0.00 | 0.01 | 95.12 |
| Limibacter_OTU#407      | 0.02 | 0.00 | 0.00 | 0.00 | 0.01 | 95.13 |
| Allobaculum_OTU#406     | 0.02 | 0.00 | 0.00 | 0.00 | 0.01 | 95.13 |
| Barnesiella_OTU#101     | 0.02 | 0.00 | 0.00 | 0.00 | 0.01 | 95.14 |
| Limibacter_OTU#405      | 0.02 | 0.00 | 0.00 | 0.00 | 0.01 | 95.15 |
| Barnesiella_OTU#808     | 0.02 | 0.00 | 0.00 | 0.00 | 0.01 | 95.16 |
| Limibacter_OTU#404      | 0.02 | 0.00 | 0.00 | 0.00 | 0.01 | 95.16 |
| Allobaculum_OTU#25      | 0.02 | 0.00 | 0.00 | 0.00 | 0.01 | 95.17 |
| Paludibacter_OTU#403    | 0.02 | 0.00 | 0.00 | 0.00 | 0.01 | 95.18 |
| Barnesiella_OTU#804     | 0.02 | 0.00 | 0.00 | 0.00 | 0.01 | 95.19 |
| Rikenella_OTU#402       | 0.02 | 0.00 | 0.00 | 0.00 | 0.01 | 95.19 |
| Anaerophaga_OTU#803     | 0.02 | 0.00 | 0.00 | 0.00 | 0.01 | 95.20 |
| Paludibacter_OTU#802    | 0.02 | 0.00 | 0.00 | 0.00 | 0.01 | 95.21 |
| Lachnobacterium_OTU#800 | 0.02 | 0.00 | 0.00 | 0.00 | 0.01 | 95.22 |
| Limibacter_OTU#50       | 0.02 | 0.00 | 0.00 | 0.00 | 0.01 | 95.22 |
| Anaerophaga_OTU#1143    | 0.00 | 0.00 | 0.03 | 0.00 | 0.01 | 95.23 |

Supplementary Table 6

|                             |      |      |      |      |      |       |
|-----------------------------|------|------|------|------|------|-------|
| Barnesiella_OTU#798         | 0.02 | 0.00 | 0.00 | 0.00 | 0.01 | 95.24 |
| Eremococcus_OTU#398         | 0.02 | 0.00 | 0.00 | 0.00 | 0.01 | 95.25 |
| Ruminococcus_OTU#397        | 0.02 | 0.00 | 0.00 | 0.00 | 0.01 | 95.25 |
| Limibacter_OTU#793          | 0.02 | 0.00 | 0.00 | 0.00 | 0.01 | 95.26 |
| Paludibacter_OTU#792        | 0.02 | 0.00 | 0.00 | 0.00 | 0.01 | 95.27 |
| Anaerophaga_OTU#790         | 0.02 | 0.00 | 0.00 | 0.00 | 0.01 | 95.28 |
| Anaerophaga_OTU#788         | 0.02 | 0.00 | 0.00 | 0.00 | 0.01 | 95.28 |
| Limibacter_OTU#394          | 0.02 | 0.00 | 0.00 | 0.00 | 0.01 | 95.29 |
| Paludibacter_OTU#393        | 0.02 | 0.00 | 0.00 | 0.00 | 0.01 | 95.30 |
| Limibacter_OTU#785          | 0.02 | 0.00 | 0.00 | 0.00 | 0.01 | 95.31 |
| Paludibacter_OTU#784        | 0.02 | 0.00 | 0.00 | 0.00 | 0.01 | 95.31 |
| Parasutterella_OTU#392      | 0.02 | 0.00 | 0.00 | 0.00 | 0.01 | 95.32 |
| Allobaculum_OTU#391         | 0.02 | 0.00 | 0.00 | 0.00 | 0.01 | 95.33 |
| Limibacter_OTU#781          | 0.02 | 0.00 | 0.00 | 0.00 | 0.01 | 95.34 |
| Paludibacter_OTU#390        | 0.02 | 0.00 | 0.00 | 0.00 | 0.01 | 95.34 |
| Coprococcus_OTU#779         | 0.02 | 0.00 | 0.00 | 0.00 | 0.01 | 95.35 |
| Helicobacter_OTU#778        | 0.02 | 0.00 | 0.00 | 0.00 | 0.01 | 95.36 |
| Anaerophaga_OTU#387         | 0.02 | 0.00 | 0.00 | 0.00 | 0.01 | 95.37 |
| Paludibacter_OTU#773        | 0.02 | 0.00 | 0.00 | 0.00 | 0.01 | 95.38 |
| Paludibacter_OTU#772        | 0.02 | 0.00 | 0.00 | 0.00 | 0.01 | 95.38 |
| Allobaculum_OTU#771         | 0.02 | 0.00 | 0.00 | 0.00 | 0.01 | 95.39 |
| Ethanoligenens_OTU#385      | 0.02 | 0.00 | 0.00 | 0.00 | 0.01 | 95.40 |
| Allobaculum_OTU#384         | 0.02 | 0.00 | 0.00 | 0.00 | 0.01 | 95.41 |
| Helicobacter_OTU#48         | 0.02 | 0.00 | 0.00 | 0.00 | 0.01 | 95.41 |
| Roseburia_OTU#1139          | 0.00 | 0.00 | 0.03 | 0.00 | 0.01 | 95.42 |
| Parasporobacterium_OTU#1095 | 0.02 | 0.00 | 0.00 | 0.00 | 0.01 | 95.43 |
| Allobaculum_OTU#383         | 0.02 | 0.00 | 0.00 | 0.00 | 0.01 | 95.44 |
| Streptococcus_OTU#1151      | 0.00 | 0.00 | 0.03 | 0.00 | 0.01 | 95.44 |
| Marvinbryantia_OTU#1159     | 0.00 | 0.00 | 0.03 | 0.00 | 0.01 | 95.45 |
| Barnesiella_OTU#1157        | 0.00 | 0.00 | 0.03 | 0.00 | 0.01 | 95.46 |

Supplementary Table 6

|                          |      |      |      |      |      |       |
|--------------------------|------|------|------|------|------|-------|
| Anaerophaga_OTU#1150     | 0.00 | 0.00 | 0.03 | 0.00 | 0.01 | 95.47 |
| Dorea_OTU#1163           | 0.00 | 0.00 | 0.03 | 0.00 | 0.01 | 95.47 |
| Barnesiella_OTU#1164     | 0.00 | 0.00 | 0.03 | 0.00 | 0.01 | 95.48 |
| Shuttleworthia_OTU#1149  | 0.00 | 0.00 | 0.03 | 0.00 | 0.01 | 95.49 |
| Anaerophaga_OTU#1171     | 0.00 | 0.00 | 0.03 | 0.00 | 0.01 | 95.50 |
| Limibacter_OTU#1174      | 0.00 | 0.00 | 0.03 | 0.00 | 0.01 | 95.50 |
| Limibacter_OTU#1175      | 0.00 | 0.00 | 0.03 | 0.00 | 0.01 | 95.51 |
| Limibacter_OTU#93        | 0.02 | 0.00 | 0.00 | 0.00 | 0.01 | 95.52 |
| Paludibacter_OTU#1179    | 0.00 | 0.00 | 0.03 | 0.00 | 0.01 | 95.53 |
| Bulleidia_OTU#46         | 0.02 | 0.00 | 0.00 | 0.00 | 0.01 | 95.53 |
| Paludibacter_OTU#23      | 0.02 | 0.00 | 0.00 | 0.00 | 0.01 | 95.54 |
| Robinsoniella_OTU#1167   | 0.00 | 0.00 | 0.03 | 0.00 | 0.01 | 95.55 |
| Barnesiella_OTU#1187     | 0.00 | 0.00 | 0.03 | 0.00 | 0.01 | 95.56 |
| Allobaculum_OTU#91       | 0.02 | 0.00 | 0.00 | 0.00 | 0.01 | 95.56 |
| Parabacteroides_OTU#1189 | 0.00 | 0.00 | 0.03 | 0.00 | 0.01 | 95.57 |
| Paludibacter_OTU#1183    | 0.00 | 0.00 | 0.03 | 0.00 | 0.01 | 95.58 |
| Barnesiella_OTU#1194     | 0.00 | 0.00 | 0.03 | 0.00 | 0.01 | 95.59 |
| Anaerophaga_OTU#1195     | 0.00 | 0.00 | 0.03 | 0.00 | 0.01 | 95.59 |
| Paludibacter_OTU#1191    | 0.00 | 0.00 | 0.03 | 0.00 | 0.01 | 95.60 |
| Barnesiella_OTU#1198     | 0.00 | 0.00 | 0.03 | 0.00 | 0.01 | 95.61 |
| Limibacter_OTU#45        | 0.02 | 0.00 | 0.00 | 0.00 | 0.01 | 95.62 |
| Parasutterella_OTU#1197  | 0.00 | 0.00 | 0.03 | 0.00 | 0.01 | 95.62 |
| Parasutterella_OTU#90    | 0.02 | 0.00 | 0.00 | 0.00 | 0.01 | 95.63 |
| Anaerotruncus_OTU#1182   | 0.00 | 0.00 | 0.03 | 0.00 | 0.01 | 95.64 |
| Paludibacter_OTU#1203    | 0.00 | 0.00 | 0.03 | 0.00 | 0.01 | 95.65 |
| Anaerophaga_OTU#1202     | 0.00 | 0.00 | 0.03 | 0.00 | 0.01 | 95.66 |
| Limibacter_OTU#89        | 0.02 | 0.00 | 0.00 | 0.00 | 0.01 | 95.66 |
| Rikenella_OTU#1207       | 0.00 | 0.00 | 0.03 | 0.00 | 0.01 | 95.67 |
| Robinsoniella_OTU#1206   | 0.00 | 0.00 | 0.03 | 0.00 | 0.01 | 95.68 |
| Barnesiella_OTU#1209     | 0.00 | 0.00 | 0.03 | 0.00 | 0.01 | 95.69 |

Supplementary Table 6

|                         |      |      |      |      |      |       |
|-------------------------|------|------|------|------|------|-------|
| Limibacter_OTU#44       | 0.02 | 0.00 | 0.00 | 0.00 | 0.01 | 95.69 |
| Lactobacillus_OTU#1199  | 0.00 | 0.00 | 0.03 | 0.00 | 0.01 | 95.70 |
| Dorea_OTU#701           | 0.00 | 0.00 | 0.03 | 0.00 | 0.01 | 95.71 |
| Anaerotruncus_OTU#700   | 0.00 | 0.00 | 0.03 | 0.00 | 0.01 | 95.72 |
| Roseburia_OTU#1215      | 0.00 | 0.00 | 0.03 | 0.00 | 0.01 | 95.72 |
| Acetitomaculum_OTU#699  | 0.00 | 0.00 | 0.03 | 0.00 | 0.01 | 95.73 |
| Butyricoccus_OTU#698    | 0.00 | 0.00 | 0.03 | 0.00 | 0.01 | 95.74 |
| Limibacter_OTU#1214     | 0.00 | 0.00 | 0.03 | 0.00 | 0.01 | 95.75 |
| Anaerotruncus_OTU#695   | 0.00 | 0.00 | 0.03 | 0.00 | 0.01 | 95.75 |
| Paludibacter_OTU#694    | 0.00 | 0.00 | 0.03 | 0.00 | 0.01 | 95.76 |
| Acinetobacter_OTU#1219  | 0.00 | 0.00 | 0.03 | 0.00 | 0.01 | 95.77 |
| Caminicella_OTU#692     | 0.00 | 0.00 | 0.03 | 0.00 | 0.01 | 95.78 |
| Lachnobacterium_OTU#691 | 0.00 | 0.00 | 0.03 | 0.00 | 0.01 | 95.78 |
| Limibacter_OTU#86       | 0.02 | 0.00 | 0.00 | 0.00 | 0.01 | 95.79 |
| Paludibacter_OTU#689    | 0.00 | 0.00 | 0.03 | 0.00 | 0.01 | 95.80 |
| Barnesiella_OTU#1213    | 0.00 | 0.00 | 0.03 | 0.00 | 0.01 | 95.81 |
| Robinsoniella_OTU#687   | 0.00 | 0.00 | 0.03 | 0.00 | 0.01 | 95.81 |
| Marvinbryantia_OTU#686  | 0.00 | 0.00 | 0.03 | 0.00 | 0.01 | 95.82 |
| Paludibacter_OTU#21     | 0.02 | 0.00 | 0.00 | 0.00 | 0.01 | 95.83 |
| Paludibacter_OTU#684    | 0.00 | 0.00 | 0.03 | 0.00 | 0.01 | 95.84 |
| Robinsoniella_OTU#683   | 0.00 | 0.00 | 0.03 | 0.00 | 0.01 | 95.84 |
| Paludibacter_OTU#682    | 0.00 | 0.00 | 0.03 | 0.00 | 0.01 | 95.85 |
| Butyrivibrio_OTU#681    | 0.00 | 0.00 | 0.03 | 0.00 | 0.01 | 95.86 |
| Butyricoccus_OTU#610    | 0.00 | 0.00 | 0.03 | 0.00 | 0.01 | 95.87 |
| Paludibacter_OTU#679    | 0.00 | 0.00 | 0.03 | 0.00 | 0.01 | 95.87 |
| Coprococcus_OTU#678     | 0.00 | 0.00 | 0.03 | 0.00 | 0.01 | 95.88 |
| Coprococcus_OTU#677     | 0.00 | 0.00 | 0.03 | 0.00 | 0.01 | 95.89 |
| Acetitomaculum_OTU#676  | 0.00 | 0.00 | 0.03 | 0.00 | 0.01 | 95.90 |
| Limibacter_OTU#674      | 0.00 | 0.00 | 0.03 | 0.00 | 0.01 | 95.90 |
| Barnesiella_OTU#84      | 0.02 | 0.00 | 0.00 | 0.00 | 0.01 | 95.91 |

Supplementary Table 6

|                          |      |      |      |      |      |       |
|--------------------------|------|------|------|------|------|-------|
| Allobaculum_OTU#42       | 0.02 | 0.00 | 0.00 | 0.00 | 0.01 | 95.92 |
| Syntrophothermus_OTU#671 | 0.00 | 0.00 | 0.03 | 0.00 | 0.01 | 95.93 |
| Syntrophothermus_OTU#669 | 0.00 | 0.00 | 0.03 | 0.00 | 0.01 | 95.93 |
| Syntrophothermus_OTU#668 | 0.00 | 0.00 | 0.03 | 0.00 | 0.01 | 95.94 |
| Barnesiella_OTU#775      | 0.02 | 0.00 | 0.00 | 0.00 | 0.01 | 95.95 |
| Anaerophaga_OTU#667      | 0.00 | 0.00 | 0.03 | 0.00 | 0.01 | 95.96 |
| Coprococcus_OTU#666      | 0.00 | 0.00 | 0.03 | 0.00 | 0.01 | 95.97 |
| Marvinbryantia_OTU#665   | 0.00 | 0.00 | 0.03 | 0.00 | 0.01 | 95.97 |
| Anaerophaga_OTU#1320     | 0.00 | 0.00 | 0.03 | 0.00 | 0.01 | 95.98 |
| Limibacter_OTU#1318      | 0.00 | 0.00 | 0.03 | 0.00 | 0.01 | 95.99 |
| Robinsoniella_OTU#1316   | 0.00 | 0.00 | 0.03 | 0.00 | 0.01 | 96.00 |
| Paludibacter_OTU#782     | 0.02 | 0.00 | 0.00 | 0.00 | 0.01 | 96.00 |
| Allobaculum_OTU#783      | 0.02 | 0.00 | 0.00 | 0.00 | 0.01 | 96.01 |
| Robinsoniella_OTU#658    | 0.00 | 0.00 | 0.03 | 0.00 | 0.01 | 96.02 |
| Barnesiella_OTU#657      | 0.00 | 0.00 | 0.03 | 0.00 | 0.01 | 96.03 |
| Paludibacter_OTU#786     | 0.02 | 0.00 | 0.00 | 0.00 | 0.01 | 96.03 |
| Allobaculum_OTU#787      | 0.02 | 0.00 | 0.00 | 0.00 | 0.01 | 96.04 |
| Paludibacter_OTU#1313    | 0.00 | 0.00 | 0.03 | 0.00 | 0.01 | 96.05 |
| Limibacter_OTU#789       | 0.02 | 0.00 | 0.00 | 0.00 | 0.01 | 96.06 |
| Acetitomaculum_OTU#1312  | 0.00 | 0.00 | 0.03 | 0.00 | 0.01 | 96.06 |
| Acetitomaculum_OTU#656   | 0.00 | 0.00 | 0.03 | 0.00 | 0.01 | 96.07 |
| Oscillibacter_OTU#1310   | 0.00 | 0.00 | 0.03 | 0.00 | 0.01 | 96.08 |
| Roseburia_OTU#1308       | 0.00 | 0.00 | 0.03 | 0.00 | 0.01 | 96.09 |
| Parabacteroides_OTU#794  | 0.02 | 0.00 | 0.00 | 0.00 | 0.01 | 96.09 |
| Paludibacter_OTU#795     | 0.02 | 0.00 | 0.00 | 0.00 | 0.01 | 96.10 |
| Limibacter_OTU#654       | 0.00 | 0.00 | 0.03 | 0.00 | 0.01 | 96.11 |
| Paludibacter_OTU#653     | 0.00 | 0.00 | 0.03 | 0.00 | 0.01 | 96.12 |
| Robinsoniella_OTU#1304   | 0.00 | 0.00 | 0.03 | 0.00 | 0.01 | 96.12 |
| Paludibacter_OTU#799     | 0.02 | 0.00 | 0.00 | 0.00 | 0.01 | 96.13 |
| Dorea_OTU#652            | 0.00 | 0.00 | 0.03 | 0.00 | 0.01 | 96.14 |

Supplementary Table 6

|                         |      |      |      |      |      |       |
|-------------------------|------|------|------|------|------|-------|
| Robinsoniella_OTU#1302  | 0.00 | 0.00 | 0.03 | 0.00 | 0.01 | 96.15 |
| Limibacter_OTU#1301     | 0.00 | 0.00 | 0.03 | 0.00 | 0.01 | 96.15 |
| Paludibacter_OTU#1300   | 0.00 | 0.00 | 0.03 | 0.00 | 0.01 | 96.16 |
| Oscillibacter_OTU#649   | 0.00 | 0.00 | 0.03 | 0.00 | 0.01 | 96.17 |
| Paludibacter_OTU#805    | 0.02 | 0.00 | 0.00 | 0.00 | 0.01 | 96.18 |
| Rikenella_OTU#806       | 0.02 | 0.00 | 0.00 | 0.00 | 0.01 | 96.18 |
| Acetitomaculum_OTU#1297 | 0.00 | 0.00 | 0.03 | 0.00 | 0.01 | 96.19 |
| Paludibacter_OTU#1296   | 0.00 | 0.00 | 0.03 | 0.00 | 0.01 | 96.20 |
| Paludibacter_OTU#809    | 0.02 | 0.00 | 0.00 | 0.00 | 0.01 | 96.21 |
| Dorea_OTU#810           | 0.02 | 0.00 | 0.00 | 0.00 | 0.01 | 96.21 |
| Marvinbryantia_OTU#647  | 0.00 | 0.00 | 0.03 | 0.00 | 0.01 | 96.22 |
| Coprococcus_OTU#646     | 0.00 | 0.00 | 0.03 | 0.00 | 0.01 | 96.23 |
| Allobaculum_OTU#40      | 0.02 | 0.00 | 0.00 | 0.00 | 0.01 | 96.24 |
| Heliobacillus_OTU#814   | 0.02 | 0.00 | 0.00 | 0.00 | 0.01 | 96.25 |
| Dorea_OTU#645           | 0.00 | 0.00 | 0.03 | 0.00 | 0.01 | 96.25 |
| Paludibacter_OTU#1289   | 0.00 | 0.00 | 0.03 | 0.00 | 0.01 | 96.26 |
| Paludibacter_OTU#1288   | 0.00 | 0.00 | 0.03 | 0.00 | 0.01 | 96.27 |
| Anaerophaga_OTU#20      | 0.02 | 0.00 | 0.00 | 0.00 | 0.01 | 96.28 |
| Paludibacter_OTU#819    | 0.02 | 0.00 | 0.00 | 0.00 | 0.01 | 96.28 |
| Oscillibacter_OTU#1286  | 0.00 | 0.00 | 0.03 | 0.00 | 0.01 | 96.29 |
| Coprococcus_OTU#1285    | 0.00 | 0.00 | 0.03 | 0.00 | 0.01 | 96.30 |
| Helicobacter_OTU#822    | 0.02 | 0.00 | 0.00 | 0.00 | 0.01 | 96.31 |
| Paludibacter_OTU#823    | 0.02 | 0.00 | 0.00 | 0.00 | 0.01 | 96.31 |
| Dorea_OTU#1284          | 0.00 | 0.00 | 0.03 | 0.00 | 0.01 | 96.32 |
| Oscillibacter_OTU#641   | 0.00 | 0.00 | 0.03 | 0.00 | 0.01 | 96.33 |
| Limibacter_OTU#826      | 0.02 | 0.00 | 0.00 | 0.00 | 0.01 | 96.34 |
| Limibacter_OTU#827      | 0.02 | 0.00 | 0.00 | 0.00 | 0.01 | 96.34 |
| Paludibacter_OTU#1281   | 0.00 | 0.00 | 0.03 | 0.00 | 0.01 | 96.35 |
| Robinsoniella_OTU#1280  | 0.00 | 0.00 | 0.03 | 0.00 | 0.01 | 96.36 |
| Barnesiella_OTU#830     | 0.02 | 0.00 | 0.00 | 0.00 | 0.01 | 96.37 |

Supplementary Table 6

|                            |      |      |      |      |      |       |
|----------------------------|------|------|------|------|------|-------|
| Oscillibacter_OTU#640      | 0.00 | 0.00 | 0.03 | 0.00 | 0.01 | 96.37 |
| Anaerophaga_OTU#80         | 0.02 | 0.00 | 0.00 | 0.00 | 0.01 | 96.38 |
| Parasporobacterium_OTU#639 | 0.00 | 0.00 | 0.03 | 0.00 | 0.01 | 96.39 |
| Barnesiella_OTU#1276       | 0.00 | 0.00 | 0.03 | 0.00 | 0.01 | 96.40 |
| Syntrophococcus_OTU#638    | 0.00 | 0.00 | 0.03 | 0.00 | 0.01 | 96.40 |
| Barnesiella_OTU#1274       | 0.00 | 0.00 | 0.03 | 0.00 | 0.01 | 96.41 |
| Anaerophaga_OTU#637        | 0.00 | 0.00 | 0.03 | 0.00 | 0.01 | 96.42 |
| Robinsoniella_OTU#1273     | 0.00 | 0.00 | 0.03 | 0.00 | 0.01 | 96.43 |
| Anaerophaga_OTU#839        | 0.02 | 0.00 | 0.00 | 0.00 | 0.01 | 96.43 |
| Paludibacter_OTU#635       | 0.00 | 0.00 | 0.03 | 0.00 | 0.01 | 96.44 |
| Paludibacter_OTU#1268      | 0.00 | 0.00 | 0.03 | 0.00 | 0.01 | 96.45 |
| Limibacter_OTU#634         | 0.00 | 0.00 | 0.03 | 0.00 | 0.01 | 96.46 |
| Syntrophococcus_OTU#843    | 0.02 | 0.00 | 0.00 | 0.00 | 0.01 | 96.46 |
| Coprococcus_OTU#633        | 0.00 | 0.00 | 0.03 | 0.00 | 0.01 | 96.47 |
| Barnesiella_OTU#1265       | 0.00 | 0.00 | 0.03 | 0.00 | 0.01 | 96.48 |
| Robinsoniella_OTU#1264     | 0.00 | 0.00 | 0.03 | 0.00 | 0.01 | 96.49 |
| Anaerophaga_OTU#847        | 0.02 | 0.00 | 0.00 | 0.00 | 0.01 | 96.49 |
| Butyrivibrio_OTU#632       | 0.00 | 0.00 | 0.03 | 0.00 | 0.01 | 96.50 |
| Marvinbryantia_OTU#1262    | 0.00 | 0.00 | 0.03 | 0.00 | 0.01 | 96.51 |
| Effluviibacter_OTU#630     | 0.00 | 0.00 | 0.03 | 0.00 | 0.01 | 96.52 |
| Limibacter_OTU#851         | 0.02 | 0.00 | 0.00 | 0.00 | 0.01 | 96.53 |
| Oscillibacter_OTU#629      | 0.00 | 0.00 | 0.03 | 0.00 | 0.01 | 96.53 |
| Anaerophaga_OTU#1257       | 0.00 | 0.00 | 0.03 | 0.00 | 0.01 | 96.54 |
| Limibacter_OTU#854         | 0.02 | 0.00 | 0.00 | 0.00 | 0.01 | 96.55 |
| Paludibacter_OTU#855       | 0.02 | 0.00 | 0.00 | 0.00 | 0.01 | 96.56 |
| Syntrophococcus_OTU#628    | 0.00 | 0.00 | 0.03 | 0.00 | 0.01 | 96.56 |
| Robinsoniella_OTU#625      | 0.00 | 0.00 | 0.03 | 0.00 | 0.01 | 96.57 |
| Limibacter_OTU#624         | 0.00 | 0.00 | 0.03 | 0.00 | 0.01 | 96.58 |
| Paludibacter_OTU#623       | 0.00 | 0.00 | 0.03 | 0.00 | 0.01 | 96.59 |
| Barnesiella_OTU#622        | 0.00 | 0.00 | 0.03 | 0.00 | 0.01 | 96.59 |

Supplementary Table 6

|                         |      |      |      |      |      |       |
|-------------------------|------|------|------|------|------|-------|
| Anaerophaga_OTU#1258    | 0.00 | 0.00 | 0.03 | 0.00 | 0.01 | 96.60 |
| Butyricoccus_OTU#862    | 0.02 | 0.00 | 0.00 | 0.00 | 0.01 | 96.61 |
| Barnesiella_OTU#1261    | 0.00 | 0.00 | 0.03 | 0.00 | 0.01 | 96.62 |
| Marvinbryantia_OTU#1260 | 0.00 | 0.00 | 0.03 | 0.00 | 0.01 | 96.62 |
| Paludibacter_OTU#627    | 0.00 | 0.00 | 0.03 | 0.00 | 0.01 | 96.63 |
| Anaerophaga_OTU#1266    | 0.00 | 0.00 | 0.03 | 0.00 | 0.01 | 96.64 |
| Limibacter_OTU#867      | 0.02 | 0.00 | 0.00 | 0.00 | 0.01 | 96.65 |
| Pseudozobellia_OTU#618  | 0.00 | 0.00 | 0.03 | 0.00 | 0.01 | 96.65 |
| Paludibacter_OTU#1269   | 0.00 | 0.00 | 0.03 | 0.00 | 0.01 | 96.66 |
| Parasutterella_OTU#616  | 0.00 | 0.00 | 0.03 | 0.00 | 0.01 | 96.67 |
| Turicibacter_OTU#1263   | 0.00 | 0.00 | 0.03 | 0.00 | 0.01 | 96.68 |
| Limibacter_OTU#626      | 0.00 | 0.00 | 0.03 | 0.00 | 0.01 | 96.68 |
| Barnesiella_OTU#1277    | 0.00 | 0.00 | 0.03 | 0.00 | 0.01 | 96.69 |
| Anaerophaga_OTU#612     | 0.00 | 0.00 | 0.03 | 0.00 | 0.01 | 96.70 |
| Paludibacter_OTU#1275   | 0.00 | 0.00 | 0.03 | 0.00 | 0.01 | 96.71 |
| Lactobacillus_OTU#1271  | 0.00 | 0.00 | 0.03 | 0.00 | 0.01 | 96.71 |
| Tannerella_OTU#1220     | 0.00 | 0.00 | 0.03 | 0.00 | 0.01 | 96.72 |
| Barnesiella_OTU#1279    | 0.00 | 0.00 | 0.03 | 0.00 | 0.01 | 96.73 |
| Robinsoniella_OTU#879   | 0.00 | 0.00 | 0.03 | 0.00 | 0.01 | 96.74 |
| Dorea_OTU#1218          | 0.00 | 0.00 | 0.03 | 0.00 | 0.01 | 96.74 |
| Acetitomaculum_OTU#609  | 0.00 | 0.00 | 0.03 | 0.00 | 0.01 | 96.75 |
| Anaerophaga_OTU#1217    | 0.00 | 0.00 | 0.03 | 0.00 | 0.01 | 96.76 |
| Butyricoccus_OTU#883    | 0.00 | 0.00 | 0.03 | 0.00 | 0.01 | 96.77 |
| Robinsoniella_OTU#1216  | 0.00 | 0.00 | 0.03 | 0.00 | 0.01 | 96.77 |
| Tannerella_OTU#608      | 0.00 | 0.00 | 0.03 | 0.00 | 0.01 | 96.78 |
| Barnesiella_OTU#1278    | 0.00 | 0.00 | 0.03 | 0.00 | 0.01 | 96.79 |
| Acetitomaculum_OTU#887  | 0.00 | 0.00 | 0.03 | 0.00 | 0.01 | 96.80 |
| Pseudozobellia_OTU#607  | 0.00 | 0.00 | 0.03 | 0.00 | 0.01 | 96.80 |
| Marvinbryantia_OTU#1212 | 0.00 | 0.00 | 0.03 | 0.00 | 0.01 | 96.81 |
| Robinsoniella_OTU#606   | 0.00 | 0.00 | 0.03 | 0.00 | 0.01 | 96.82 |

Supplementary Table 6



|                              |      |      |      |      |      |       |
|------------------------------|------|------|------|------|------|-------|
| Robinsoniella_OTU#1211       | 0.00 | 0.00 | 0.03 | 0.00 | 0.01 | 96.83 |
| Terasakiella_OTU#1208        | 0.00 | 0.00 | 0.03 | 0.00 | 0.01 | 96.84 |
| Butyricoccus_OTU#893         | 0.00 | 0.00 | 0.03 | 0.00 | 0.01 | 96.84 |
| Lachnobacterium_OTU#894      | 0.00 | 0.00 | 0.03 | 0.00 | 0.01 | 96.85 |
| Paludibacter_OTU#895         | 0.00 | 0.00 | 0.03 | 0.00 | 0.01 | 96.86 |
| Allobaculum_OTU#75           | 0.02 | 0.00 | 0.00 | 0.00 | 0.01 | 96.87 |
| Paludibacter_OTU#1283        | 0.00 | 0.00 | 0.03 | 0.00 | 0.01 | 96.87 |
| Robinsoniella_OTU#603        | 0.00 | 0.00 | 0.03 | 0.00 | 0.01 | 96.88 |
| Sharpea_OTU#1204             | 0.00 | 0.00 | 0.03 | 0.00 | 0.01 | 96.89 |
| Limibacter_OTU#601           | 0.00 | 0.00 | 0.03 | 0.00 | 0.01 | 96.90 |
| Anaerotruncus_OTU#1201       | 0.00 | 0.00 | 0.03 | 0.00 | 0.01 | 96.90 |
| Turcibacter_OTU#1200         | 0.00 | 0.00 | 0.03 | 0.00 | 0.01 | 96.91 |
| Anaerophaga_OTU#903          | 0.00 | 0.00 | 0.03 | 0.00 | 0.01 | 96.92 |
| Paludibacter_OTU#1282        | 0.00 | 0.00 | 0.03 | 0.00 | 0.01 | 96.93 |
| Dorea_OTU#905                | 0.00 | 0.00 | 0.03 | 0.00 | 0.01 | 96.93 |
| Lachnobacterium_OTU#599      | 0.00 | 0.00 | 0.03 | 0.00 | 0.01 | 96.94 |
| Robinsoniella_OTU#907        | 0.00 | 0.00 | 0.03 | 0.00 | 0.01 | 96.95 |
| Butyrivibrio_OTU#1196        | 0.00 | 0.00 | 0.03 | 0.00 | 0.01 | 96.96 |
| Escherichia/Shigella_OTU#909 | 0.00 | 0.00 | 0.03 | 0.00 | 0.01 | 96.96 |
| Butyrivibrio_OTU#910         | 0.00 | 0.00 | 0.03 | 0.00 | 0.01 | 96.97 |
| Streptophyta_OTU#911         | 0.00 | 0.00 | 0.03 | 0.00 | 0.01 | 96.98 |
| Roseburia_OTU#598            | 0.00 | 0.00 | 0.03 | 0.00 | 0.01 | 96.99 |
| Oscillibacter_OTU#597        | 0.00 | 0.00 | 0.03 | 0.00 | 0.01 | 96.99 |
| Butyrivibrio_OTU#914         | 0.00 | 0.00 | 0.03 | 0.00 | 0.01 | 97.00 |
| Robinsoniella_OTU#1193       | 0.00 | 0.00 | 0.03 | 0.00 | 0.01 | 97.01 |
| Marvinbryantia_OTU#1192      | 0.00 | 0.00 | 0.03 | 0.00 | 0.01 | 97.02 |
| Paludibacter_OTU#1190        | 0.00 | 0.00 | 0.03 | 0.00 | 0.01 | 97.02 |
| Robinsoniella_OTU#1188       | 0.00 | 0.00 | 0.03 | 0.00 | 0.01 | 97.03 |
| Marvinbryantia_OTU#594       | 0.00 | 0.00 | 0.03 | 0.00 | 0.01 | 97.04 |
| Limibacter_OTU#1186          | 0.00 | 0.00 | 0.03 | 0.00 | 0.01 | 97.05 |

Supplementary Table 6

|                          |      |      |      |      |      |       |
|--------------------------|------|------|------|------|------|-------|
| Paludibacter_OTU#593     | 0.00 | 0.00 | 0.03 | 0.00 | 0.01 | 97.05 |
| Roseburia_OTU#1185       | 0.00 | 0.00 | 0.03 | 0.00 | 0.01 | 97.06 |
| Pseudozobellia_OTU#1184  | 0.00 | 0.00 | 0.03 | 0.00 | 0.01 | 97.07 |
| Allobaculum_OTU#74       | 0.02 | 0.00 | 0.00 | 0.00 | 0.01 | 97.08 |
| Oscillibacter_OTU#591    | 0.00 | 0.00 | 0.03 | 0.00 | 0.01 | 97.08 |
| Paludibacter_OTU#1180    | 0.00 | 0.00 | 0.03 | 0.00 | 0.01 | 97.09 |
| Oscillibacter_OTU#927    | 0.00 | 0.00 | 0.03 | 0.00 | 0.01 | 97.10 |
| Lactobacillus_OTU#590    | 0.00 | 0.00 | 0.03 | 0.00 | 0.01 | 97.11 |
| Robinsoniella_OTU#1178   | 0.00 | 0.00 | 0.03 | 0.00 | 0.01 | 97.12 |
| Blautia_OTU#1177         | 0.00 | 0.00 | 0.03 | 0.00 | 0.01 | 97.12 |
| Lachnobacterium_OTU#588  | 0.00 | 0.00 | 0.03 | 0.00 | 0.01 | 97.13 |
| Marvinbryantia_OTU#587   | 0.00 | 0.00 | 0.03 | 0.00 | 0.01 | 97.14 |
| Oscillibacter_OTU#933    | 0.00 | 0.00 | 0.03 | 0.00 | 0.01 | 97.15 |
| Globicatella_OTU#1173    | 0.00 | 0.00 | 0.03 | 0.00 | 0.01 | 97.15 |
| Robinsoniella_OTU#935    | 0.00 | 0.00 | 0.03 | 0.00 | 0.01 | 97.16 |
| Syntrophococcus_OTU#1172 | 0.00 | 0.00 | 0.03 | 0.00 | 0.01 | 97.17 |
| Syntrophococcus_OTU#1170 | 0.00 | 0.00 | 0.03 | 0.00 | 0.01 | 97.18 |
| Paludibacter_OTU#938     | 0.00 | 0.00 | 0.03 | 0.00 | 0.01 | 97.18 |
| Paludibacter_OTU#585     | 0.00 | 0.00 | 0.03 | 0.00 | 0.01 | 97.19 |
| Lachnobacterium_OTU#1169 | 0.00 | 0.00 | 0.03 | 0.00 | 0.01 | 97.20 |
| Coprococcus_OTU#584      | 0.00 | 0.00 | 0.03 | 0.00 | 0.01 | 97.21 |
| Paludibacter_OTU#1166    | 0.00 | 0.00 | 0.03 | 0.00 | 0.01 | 97.21 |
| Papillibacter_OTU#582    | 0.00 | 0.00 | 0.03 | 0.00 | 0.01 | 97.22 |
| Allobaculum_OTU#36       | 0.02 | 0.00 | 0.00 | 0.00 | 0.01 | 97.23 |
| Pseudozobellia_OTU#1162  | 0.00 | 0.00 | 0.03 | 0.00 | 0.01 | 97.24 |
| Staphylococcus_OTU#1161  | 0.00 | 0.00 | 0.03 | 0.00 | 0.01 | 97.24 |
| Barnesiella_OTU#1160     | 0.00 | 0.00 | 0.03 | 0.00 | 0.01 | 97.25 |
| Anaerophaga_OTU#18       | 0.02 | 0.00 | 0.00 | 0.00 | 0.01 | 97.26 |
| Limibacter_OTU#1158      | 0.00 | 0.00 | 0.03 | 0.00 | 0.01 | 97.27 |
| Marvinbryantia_OTU#950   | 0.00 | 0.00 | 0.03 | 0.00 | 0.01 | 97.27 |

Supplementary Table 6

|                             |      |      |      |      |      |       |
|-----------------------------|------|------|------|------|------|-------|
| Allobaculum_OTU#1156        | 0.00 | 0.00 | 0.03 | 0.00 | 0.01 | 97.28 |
| Paludibacter_OTU#578        | 0.00 | 0.00 | 0.03 | 0.00 | 0.01 | 97.29 |
| Butyrivibrio_OTU#953        | 0.00 | 0.00 | 0.03 | 0.00 | 0.01 | 97.30 |
| Ruminococcus_OTU#954        | 0.00 | 0.00 | 0.03 | 0.00 | 0.01 | 97.30 |
| Anaerotruncus_OTU#955       | 0.00 | 0.00 | 0.03 | 0.00 | 0.01 | 97.31 |
| Oscillibacter_OTU#1155      | 0.00 | 0.00 | 0.03 | 0.00 | 0.01 | 97.32 |
| Marvinbryantia_OTU#957      | 0.00 | 0.00 | 0.03 | 0.00 | 0.01 | 97.33 |
| Maritalea_OTU#1154          | 0.00 | 0.00 | 0.03 | 0.00 | 0.01 | 97.33 |
| Robinsoniella_OTU#577       | 0.00 | 0.00 | 0.03 | 0.00 | 0.01 | 97.34 |
| Paludibacter_OTU#1153       | 0.00 | 0.00 | 0.03 | 0.00 | 0.01 | 97.35 |
| Paludibacter_OTU#1152       | 0.00 | 0.00 | 0.03 | 0.00 | 0.01 | 97.36 |
| Robinsoniella_OTU#576       | 0.00 | 0.00 | 0.03 | 0.00 | 0.01 | 97.36 |
| Lachnobacterium_OTU#575     | 0.00 | 0.00 | 0.03 | 0.00 | 0.01 | 97.37 |
| Limibacter_OTU#1148         | 0.00 | 0.00 | 0.03 | 0.00 | 0.01 | 97.38 |
| Dorea_OTU#574               | 0.00 | 0.00 | 0.03 | 0.00 | 0.01 | 97.39 |
| Robinsoniella_OTU#966       | 0.00 | 0.00 | 0.03 | 0.00 | 0.01 | 97.39 |
| Barnesiella_OTU#967         | 0.00 | 0.00 | 0.03 | 0.00 | 0.01 | 97.40 |
| Paludibacter_OTU#1147       | 0.00 | 0.00 | 0.03 | 0.00 | 0.01 | 97.41 |
| Paludibacter_OTU#1146       | 0.00 | 0.00 | 0.03 | 0.00 | 0.01 | 97.42 |
| Pseudozobellia_OTU#572      | 0.00 | 0.00 | 0.03 | 0.00 | 0.01 | 97.43 |
| Parasporobacterium_OTU#971  | 0.00 | 0.00 | 0.03 | 0.00 | 0.01 | 97.43 |
| Parasporobacterium_OTU#1142 | 0.00 | 0.00 | 0.03 | 0.00 | 0.01 | 97.44 |
| Butyricoccus_OTU#973        | 0.00 | 0.00 | 0.03 | 0.00 | 0.01 | 97.45 |
| Allobaculum_OTU#974         | 0.00 | 0.00 | 0.03 | 0.00 | 0.01 | 97.46 |
| Blautia_OTU#1140            | 0.00 | 0.00 | 0.03 | 0.00 | 0.01 | 97.46 |
| Papillibacter_OTU#570       | 0.00 | 0.00 | 0.03 | 0.00 | 0.01 | 97.47 |
| Lachnobacterium_OTU#569     | 0.00 | 0.00 | 0.03 | 0.00 | 0.01 | 97.48 |
| Oscillibacter_OTU#978       | 0.00 | 0.00 | 0.03 | 0.00 | 0.01 | 97.49 |
| Syntrophococcus_OTU#979     | 0.00 | 0.00 | 0.03 | 0.00 | 0.01 | 97.49 |
| Anaerophaga_OTU#1136        | 0.00 | 0.00 | 0.03 | 0.00 | 0.01 | 97.50 |

Supplementary Table 6

|                          |      |      |      |      |      |       |
|--------------------------|------|------|------|------|------|-------|
| Parasutterella_OTU#981   | 0.00 | 0.00 | 0.03 | 0.00 | 0.01 | 97.51 |
| Dorea_OTU#568            | 0.00 | 0.00 | 0.03 | 0.00 | 0.01 | 97.52 |
| Paludibacter_OTU#1293    | 0.00 | 0.00 | 0.03 | 0.00 | 0.01 | 97.52 |
| Anaerophaga_OTU#1292     | 0.00 | 0.00 | 0.03 | 0.00 | 0.01 | 97.53 |
| Robinsoniella_OTU#567    | 0.00 | 0.00 | 0.03 | 0.00 | 0.01 | 97.54 |
| Syntrophococcus_OTU#1133 | 0.00 | 0.00 | 0.03 | 0.00 | 0.01 | 97.55 |
| Butyricoccus_OTU#987     | 0.00 | 0.00 | 0.03 | 0.00 | 0.01 | 97.55 |
| Roseburia_OTU#1132       | 0.00 | 0.00 | 0.03 | 0.00 | 0.01 | 97.56 |
| Anaerophaga_OTU#1130     | 0.00 | 0.00 | 0.03 | 0.00 | 0.01 | 97.57 |
| Marvinbryantia_OTU#1129  | 0.02 | 0.00 | 0.00 | 0.00 | 0.01 | 97.58 |
| Bulleidia_OTU#991        | 0.00 | 0.00 | 0.03 | 0.00 | 0.01 | 97.58 |
| Paludibacter_OTU#1128    | 0.02 | 0.00 | 0.00 | 0.00 | 0.01 | 97.59 |
| Howardella_OTU#993       | 0.00 | 0.00 | 0.03 | 0.00 | 0.01 | 97.60 |
| Marvinbryantia_OTU#994   | 0.00 | 0.00 | 0.03 | 0.00 | 0.01 | 97.61 |
| Acidovorax_OTU#995       | 0.00 | 0.00 | 0.03 | 0.00 | 0.01 | 97.61 |
| Lachnobacterium_OTU#1295 | 0.00 | 0.00 | 0.03 | 0.00 | 0.01 | 97.62 |
| Anaerophaga_OTU#997      | 0.00 | 0.00 | 0.03 | 0.00 | 0.01 | 97.63 |
| Tannerella_OTU#563       | 0.00 | 0.00 | 0.03 | 0.00 | 0.01 | 97.64 |
| Lachnobacterium_OTU#1125 | 0.02 | 0.00 | 0.00 | 0.00 | 0.01 | 97.64 |
| Allobaculum_OTU#1124     | 0.02 | 0.00 | 0.00 | 0.00 | 0.01 | 97.65 |
| Marvinbryantia_OTU#561   | 0.00 | 0.00 | 0.03 | 0.00 | 0.01 | 97.66 |
| Tannerella_OTU#501       | 0.02 | 0.00 | 0.00 | 0.00 | 0.01 | 97.67 |
| Sporobacterium_OTU#1121  | 0.02 | 0.00 | 0.00 | 0.00 | 0.01 | 97.67 |
| Paludibacter_OTU#1120    | 0.02 | 0.00 | 0.00 | 0.00 | 0.01 | 97.68 |
| Barnesiella_OTU#1294     | 0.00 | 0.00 | 0.03 | 0.00 | 0.01 | 97.69 |
| Paludibacter_OTU#1291    | 0.00 | 0.00 | 0.03 | 0.00 | 0.01 | 97.70 |
| Mucispirillum_OTU#559    | 0.00 | 0.00 | 0.03 | 0.00 | 0.01 | 97.71 |
| Syntrophococcus_OTU#1117 | 0.02 | 0.00 | 0.00 | 0.00 | 0.01 | 97.71 |
| Robinsoniella_OTU#1116   | 0.02 | 0.00 | 0.00 | 0.00 | 0.01 | 97.72 |
| Syntrophococcus_OTU#557  | 0.00 | 0.00 | 0.03 | 0.00 | 0.01 | 97.73 |

Supplementary Table 6

|                             |      |      |      |      |      |       |
|-----------------------------|------|------|------|------|------|-------|
| Oscillibacter_OTU#1113      | 0.02 | 0.00 | 0.00 | 0.00 | 0.01 | 97.74 |
| Paludibacter_OTU#506        | 0.02 | 0.00 | 0.00 | 0.00 | 0.01 | 97.74 |
| Dorea_OTU#1112              | 0.02 | 0.00 | 0.00 | 0.00 | 0.01 | 97.75 |
| Limibacter_OTU#1110         | 0.02 | 0.00 | 0.00 | 0.00 | 0.01 | 97.76 |
| Parasporobacterium_OTU#1108 | 0.02 | 0.00 | 0.00 | 0.00 | 0.01 | 97.77 |
| Robinsoniella_OTU#554       | 0.00 | 0.00 | 0.03 | 0.00 | 0.01 | 97.77 |
| Robinsoniella_OTU#1106      | 0.02 | 0.00 | 0.00 | 0.00 | 0.01 | 97.78 |
| Limibacter_OTU#1105         | 0.02 | 0.00 | 0.00 | 0.00 | 0.01 | 97.79 |
| Allobaculum_OTU#1104        | 0.02 | 0.00 | 0.00 | 0.00 | 0.01 | 97.80 |
| Limibacter_OTU#552          | 0.00 | 0.00 | 0.03 | 0.00 | 0.01 | 97.80 |
| Paludibacter_OTU#551        | 0.00 | 0.00 | 0.03 | 0.00 | 0.01 | 97.81 |
| Paludibacter_OTU#511        | 0.02 | 0.00 | 0.00 | 0.00 | 0.01 | 97.82 |
| Paraprevotella_OTU#1103     | 0.02 | 0.00 | 0.00 | 0.00 | 0.01 | 97.83 |
| Paludibacter_OTU#1101       | 0.02 | 0.00 | 0.00 | 0.00 | 0.01 | 97.83 |
| Rikenella_OTU#1100          | 0.02 | 0.00 | 0.00 | 0.00 | 0.01 | 97.84 |
| Paludibacter_OTU#549        | 0.00 | 0.00 | 0.03 | 0.00 | 0.01 | 97.85 |
| Lachnobacterium_OTU#1097    | 0.02 | 0.00 | 0.00 | 0.00 | 0.01 | 97.86 |
| Rikenella_OTU#1096          | 0.02 | 0.00 | 0.00 | 0.00 | 0.01 | 97.86 |
| Anaerophaga_OTU#548         | 0.00 | 0.00 | 0.03 | 0.00 | 0.01 | 97.87 |
| Paludibacter_OTU#547        | 0.00 | 0.00 | 0.03 | 0.00 | 0.01 | 97.88 |
| Butyricoccus_OTU#1093       | 0.02 | 0.00 | 0.00 | 0.00 | 0.01 | 97.89 |
| Allobaculum_OTU#1092        | 0.02 | 0.00 | 0.00 | 0.00 | 0.01 | 97.89 |
| Anaerophaga_OTU#1091        | 0.02 | 0.00 | 0.00 | 0.00 | 0.01 | 97.90 |
| Thiorhodospira_OTU#1090     | 0.02 | 0.00 | 0.00 | 0.00 | 0.01 | 97.91 |
| Anaerophaga_OTU#1089        | 0.02 | 0.00 | 0.00 | 0.00 | 0.01 | 97.92 |
| Anaerophaga_OTU#1290        | 0.00 | 0.00 | 0.03 | 0.00 | 0.01 | 97.92 |
| Parasporobacterium_OTU#543  | 0.00 | 0.00 | 0.03 | 0.00 | 0.01 | 97.93 |
| Allobaculum_OTU#1084        | 0.02 | 0.00 | 0.00 | 0.00 | 0.01 | 97.94 |
| Robinsoniella_OTU#542       | 0.00 | 0.00 | 0.03 | 0.00 | 0.01 | 97.95 |
| Paludibacter_OTU#1082       | 0.02 | 0.00 | 0.00 | 0.00 | 0.01 | 97.95 |

Supplementary Table 6

|                             |      |      |      |      |      |       |
|-----------------------------|------|------|------|------|------|-------|
| Barnesiella_OTU#1081        | 0.02 | 0.00 | 0.00 | 0.00 | 0.01 | 97.96 |
| Sporobacterium_OTU#1080     | 0.02 | 0.00 | 0.00 | 0.00 | 0.01 | 97.97 |
| Lachnobacterium_OTU#540     | 0.00 | 0.00 | 0.03 | 0.00 | 0.01 | 97.98 |
| Anaerophaga_OTU#539         | 0.00 | 0.00 | 0.03 | 0.00 | 0.01 | 97.99 |
| Limibacter_OTU#1077         | 0.02 | 0.00 | 0.00 | 0.00 | 0.01 | 97.99 |
| Sporobacterium_OTU#1074     | 0.02 | 0.00 | 0.00 | 0.00 | 0.01 | 98.00 |
| Allobaculum_OTU#1073        | 0.02 | 0.00 | 0.00 | 0.00 | 0.01 | 98.01 |
| Desulfurispora_OTU#1072     | 0.02 | 0.00 | 0.00 | 0.00 | 0.01 | 98.02 |
| Limibacter_OTU#1299         | 0.00 | 0.00 | 0.03 | 0.00 | 0.01 | 98.02 |
| Allobaculum_OTU#1070        | 0.02 | 0.00 | 0.00 | 0.00 | 0.01 | 98.03 |
| Limibacter_OTU#1068         | 0.02 | 0.00 | 0.00 | 0.00 | 0.01 | 98.04 |
| Marvinbryantia_OTU#1067     | 0.02 | 0.00 | 0.00 | 0.00 | 0.01 | 98.05 |
| Paludibacter_OTU#1066       | 0.02 | 0.00 | 0.00 | 0.00 | 0.01 | 98.05 |
| Parasutterella_OTU#1065     | 0.02 | 0.00 | 0.00 | 0.00 | 0.01 | 98.06 |
| Allobaculum_OTU#1063        | 0.02 | 0.00 | 0.00 | 0.00 | 0.01 | 98.07 |
| Syntrophococcus_OTU#1062    | 0.02 | 0.00 | 0.00 | 0.00 | 0.01 | 98.08 |
| Marvinbryantia_OTU#531      | 0.00 | 0.00 | 0.03 | 0.00 | 0.01 | 98.08 |
| Parasporobacterium_OTU#1061 | 0.02 | 0.00 | 0.00 | 0.00 | 0.01 | 98.09 |
| Lachnobacterium_OTU#1060    | 0.02 | 0.00 | 0.00 | 0.00 | 0.01 | 98.10 |
| Marvinbryantia_OTU#530      | 0.00 | 0.00 | 0.03 | 0.00 | 0.01 | 98.11 |
| Paludibacter_OTU#1059       | 0.02 | 0.00 | 0.00 | 0.00 | 0.01 | 98.11 |
| Lachnobacterium_OTU#1058    | 0.02 | 0.00 | 0.00 | 0.00 | 0.01 | 98.12 |
| Anaerovorax_OTU#1057        | 0.02 | 0.00 | 0.00 | 0.00 | 0.01 | 98.13 |
| Allobaculum_OTU#1056        | 0.02 | 0.00 | 0.00 | 0.00 | 0.01 | 98.14 |
| Rikenella_OTU#1298          | 0.00 | 0.00 | 0.03 | 0.00 | 0.01 | 98.14 |
| Dorea_OTU#1055              | 0.02 | 0.00 | 0.00 | 0.00 | 0.01 | 98.15 |
| Lachnobacterium_OTU#527     | 0.00 | 0.00 | 0.03 | 0.00 | 0.01 | 98.16 |
| Paludibacter_OTU#1307       | 0.00 | 0.00 | 0.03 | 0.00 | 0.01 | 98.17 |
| Paludibacter_OTU#1306       | 0.00 | 0.00 | 0.03 | 0.00 | 0.01 | 98.17 |
| Paludibacter_OTU#1309       | 0.00 | 0.00 | 0.03 | 0.00 | 0.01 | 98.18 |

Supplementary Table 6

|                          |      |      |      |      |      |       |
|--------------------------|------|------|------|------|------|-------|
| Anaerophaga_OTU#1071     | 0.02 | 0.00 | 0.00 | 0.00 | 0.01 | 98.19 |
| Roseburia_OTU#1311       | 0.00 | 0.00 | 0.03 | 0.00 | 0.01 | 98.20 |
| Anaerophaga_OTU#1305     | 0.00 | 0.00 | 0.03 | 0.00 | 0.01 | 98.20 |
| Anaerophaga_OTU#1315     | 0.00 | 0.00 | 0.03 | 0.00 | 0.01 | 98.21 |
| Oscillibacter_OTU#1075   | 0.02 | 0.00 | 0.00 | 0.00 | 0.01 | 98.22 |
| Roseburia_OTU#1314       | 0.00 | 0.00 | 0.03 | 0.00 | 0.01 | 98.23 |
| Barnesiella_OTU#521      | 0.02 | 0.00 | 0.00 | 0.00 | 0.01 | 98.23 |
| Allobaculum_OTU#1078     | 0.02 | 0.00 | 0.00 | 0.00 | 0.01 | 98.24 |
| Syntrophococcus_OTU#1079 | 0.02 | 0.00 | 0.00 | 0.00 | 0.01 | 98.25 |
| Sediminitomix_OTU#1317   | 0.00 | 0.00 | 0.03 | 0.00 | 0.01 | 98.26 |
| Allobaculum_OTU#519      | 0.02 | 0.00 | 0.00 | 0.00 | 0.01 | 98.26 |
| Lachnobacterium_OTU#1321 | 0.00 | 0.00 | 0.03 | 0.00 | 0.01 | 98.27 |
| Paludibacter_OTU#1083    | 0.02 | 0.00 | 0.00 | 0.00 | 0.01 | 98.28 |
| Lachnobacterium_OTU#663  | 0.00 | 0.00 | 0.03 | 0.00 | 0.01 | 98.29 |
| Butyricicoccus_OTU#1085  | 0.02 | 0.00 | 0.00 | 0.00 | 0.01 | 98.30 |
| Allobaculum_OTU#1086     | 0.02 | 0.00 | 0.00 | 0.00 | 0.01 | 98.30 |
| Acetitomaculum_OTU#1087  | 0.02 | 0.00 | 0.00 | 0.00 | 0.01 | 98.31 |
| Paludibacter_OTU#517     | 0.02 | 0.00 | 0.00 | 0.00 | 0.01 | 98.32 |
| Marvinbryantia_OTU#662   | 0.00 | 0.00 | 0.03 | 0.00 | 0.01 | 98.33 |
| Paludibacter_OTU#516     | 0.02 | 0.00 | 0.00 | 0.00 | 0.01 | 98.33 |
| Pseudozobellia_OTU#1319  | 0.00 | 0.00 | 0.03 | 0.00 | 0.01 | 98.34 |
| Paludibacter_OTU#514     | 0.02 | 0.00 | 0.00 | 0.00 | 0.01 | 98.35 |
| Paludibacter_OTU#1303    | 0.00 | 0.00 | 0.03 | 0.00 | 0.01 | 98.36 |
| Syntrophococcus_OTU#1094 | 0.02 | 0.00 | 0.00 | 0.00 | 0.01 | 98.36 |
| Paludibacter_OTU#1023    | 0.00 | 0.02 | 0.00 | 0.00 | 0.01 | 98.37 |
| Barnesiella_OTU#1022     | 0.00 | 0.02 | 0.00 | 0.00 | 0.01 | 98.38 |
| Rikenella_OTU#1021       | 0.00 | 0.02 | 0.00 | 0.00 | 0.01 | 98.38 |
| Paludibacter_OTU#1020    | 0.00 | 0.02 | 0.00 | 0.00 | 0.01 | 98.39 |
| Barnesiella_OTU#255      | 0.00 | 0.02 | 0.00 | 0.00 | 0.01 | 98.40 |
| Rikenella_OTU#1018       | 0.00 | 0.02 | 0.00 | 0.00 | 0.01 | 98.41 |

Supplementary Table 6

|                         |      |      |      |      |      |       |
|-------------------------|------|------|------|------|------|-------|
| Parasutterella_OTU#1017 | 0.00 | 0.02 | 0.00 | 0.00 | 0.01 | 98.41 |
| Limibacter_OTU#127      | 0.00 | 0.00 | 0.00 | 0.02 | 0.01 | 98.42 |
| Tannerella_OTU#1015     | 0.00 | 0.02 | 0.00 | 0.00 | 0.01 | 98.43 |
| Paludibacter_OTU#1013   | 0.00 | 0.02 | 0.00 | 0.00 | 0.01 | 98.43 |
| Robinsoniella_OTU#1012  | 0.00 | 0.02 | 0.00 | 0.00 | 0.01 | 98.44 |
| Paludibacter_OTU#253    | 0.00 | 0.02 | 0.00 | 0.00 | 0.01 | 98.45 |
| Limibacter_OTU#1011     | 0.00 | 0.02 | 0.00 | 0.00 | 0.01 | 98.45 |
| Pseudozobellia_OTU#1010 | 0.00 | 0.02 | 0.00 | 0.00 | 0.01 | 98.46 |
| Paludibacter_OTU#1009   | 0.00 | 0.02 | 0.00 | 0.00 | 0.01 | 98.47 |
| Rikenella_OTU#1007      | 0.00 | 0.02 | 0.00 | 0.00 | 0.01 | 98.48 |
| Allobaculum_OTU#1004    | 0.00 | 0.02 | 0.00 | 0.00 | 0.01 | 98.48 |
| Paludibacter_OTU#1003   | 0.00 | 0.02 | 0.00 | 0.00 | 0.01 | 98.49 |
| Paludibacter_OTU#1002   | 0.00 | 0.02 | 0.00 | 0.00 | 0.01 | 98.50 |
| Anaerophaga_OTU#1000    | 0.00 | 0.02 | 0.00 | 0.00 | 0.01 | 98.50 |
| Limibacter_OTU#250      | 0.00 | 0.02 | 0.00 | 0.00 | 0.01 | 98.51 |
| Anaerophaga_OTU#248     | 0.00 | 0.02 | 0.00 | 0.00 | 0.01 | 98.52 |
| Paludibacter_OTU#124    | 0.00 | 0.00 | 0.00 | 0.02 | 0.01 | 98.52 |
| Rikenella_OTU#244       | 0.00 | 0.02 | 0.00 | 0.00 | 0.01 | 98.53 |
| Barnesiella_OTU#243     | 0.00 | 0.02 | 0.00 | 0.00 | 0.01 | 98.54 |
| Paludibacter_OTU#121    | 0.00 | 0.00 | 0.00 | 0.02 | 0.01 | 98.55 |
| Paludibacter_OTU#241    | 0.00 | 0.02 | 0.00 | 0.00 | 0.01 | 98.55 |
| Barnesiella_OTU#240     | 0.00 | 0.02 | 0.00 | 0.00 | 0.01 | 98.56 |
| Barnesiella_OTU#120     | 0.00 | 0.00 | 0.00 | 0.02 | 0.01 | 98.57 |
| Anaerophaga_OTU#238     | 0.00 | 0.02 | 0.00 | 0.00 | 0.01 | 98.57 |
| Rikenella_OTU#235       | 0.00 | 0.02 | 0.00 | 0.00 | 0.01 | 98.58 |
| Limibacter_OTU#117      | 0.00 | 0.00 | 0.00 | 0.02 | 0.01 | 98.59 |
| Parasutterella_OTU#232  | 0.00 | 0.02 | 0.00 | 0.00 | 0.01 | 98.60 |
| Parasutterella_OTU#231  | 0.00 | 0.02 | 0.00 | 0.00 | 0.01 | 98.60 |
| Hallella_OTU#229        | 0.00 | 0.02 | 0.00 | 0.00 | 0.01 | 98.61 |
| Paludibacter_OTU#228    | 0.00 | 0.02 | 0.00 | 0.00 | 0.01 | 98.62 |

Supplementary Table 6



|                          |      |      |      |      |      |       |
|--------------------------|------|------|------|------|------|-------|
| Limibacter_OTU#223       | 0.00 | 0.02 | 0.00 | 0.00 | 0.01 | 98.62 |
| Paludibacter_OTU#222     | 0.00 | 0.02 | 0.00 | 0.00 | 0.01 | 98.63 |
| Limibacter_OTU#219       | 0.00 | 0.00 | 0.00 | 0.02 | 0.01 | 98.64 |
| Limibacter_OTU#216       | 0.00 | 0.00 | 0.00 | 0.02 | 0.01 | 98.64 |
| Barnesiella_OTU#214      | 0.00 | 0.00 | 0.00 | 0.02 | 0.01 | 98.65 |
| Tannerella_OTU#210       | 0.00 | 0.00 | 0.00 | 0.02 | 0.01 | 98.66 |
| Limibacter_OTU#206       | 0.00 | 0.00 | 0.00 | 0.02 | 0.01 | 98.67 |
| Paludibacter_OTU#205     | 0.00 | 0.00 | 0.00 | 0.02 | 0.01 | 98.67 |
| Limibacter_OTU#203       | 0.00 | 0.00 | 0.00 | 0.02 | 0.01 | 98.68 |
| Barnesiella_OTU#201      | 0.00 | 0.00 | 0.00 | 0.02 | 0.01 | 98.69 |
| Limibacter_OTU#195       | 0.00 | 0.00 | 0.00 | 0.02 | 0.01 | 98.69 |
| unclassified_TM7_OTU#193 | 0.00 | 0.00 | 0.00 | 0.02 | 0.01 | 98.70 |
| Rikenella_OTU#769        | 0.00 | 0.00 | 0.00 | 0.02 | 0.01 | 98.71 |
| Lactobacillus_OTU#768    | 0.00 | 0.00 | 0.00 | 0.02 | 0.01 | 98.71 |
| Paludibacter_OTU#767     | 0.00 | 0.00 | 0.00 | 0.02 | 0.01 | 98.72 |
| Paludibacter_OTU#766     | 0.00 | 0.00 | 0.00 | 0.02 | 0.01 | 98.73 |
| Rikenella_OTU#765        | 0.00 | 0.00 | 0.00 | 0.02 | 0.01 | 98.74 |
| Paludibacter_OTU#764     | 0.00 | 0.00 | 0.00 | 0.02 | 0.01 | 98.74 |
| Paludibacter_OTU#382     | 0.00 | 0.00 | 0.00 | 0.02 | 0.01 | 98.75 |
| Lactobacillus_OTU#763    | 0.00 | 0.00 | 0.00 | 0.02 | 0.01 | 98.76 |
| Paludibacter_OTU#762     | 0.00 | 0.00 | 0.00 | 0.02 | 0.01 | 98.76 |
| Paludibacter_OTU#381     | 0.00 | 0.00 | 0.00 | 0.02 | 0.01 | 98.77 |
| Rikenella_OTU#761        | 0.00 | 0.00 | 0.00 | 0.02 | 0.01 | 98.78 |
| Paludibacter_OTU#760     | 0.00 | 0.00 | 0.00 | 0.02 | 0.01 | 98.78 |
| Paludibacter_OTU#380     | 0.00 | 0.00 | 0.00 | 0.02 | 0.01 | 98.79 |
| Paludibacter_OTU#759     | 0.00 | 0.00 | 0.00 | 0.02 | 0.01 | 98.80 |
| Limibacter_OTU#757       | 0.00 | 0.02 | 0.00 | 0.00 | 0.01 | 98.81 |
| Paludibacter_OTU#756     | 0.00 | 0.02 | 0.00 | 0.00 | 0.01 | 98.81 |
| Parasutterella_OTU#755   | 0.00 | 0.02 | 0.00 | 0.00 | 0.01 | 98.82 |
| Paludibacter_OTU#753     | 0.00 | 0.02 | 0.00 | 0.00 | 0.01 | 98.83 |

Supplementary Table 6

|                        |      |      |      |      |      |       |
|------------------------|------|------|------|------|------|-------|
| Limibacter_OTU#752     | 0.00 | 0.02 | 0.00 | 0.00 | 0.01 | 98.83 |
| Paludibacter_OTU#188   | 0.00 | 0.00 | 0.00 | 0.02 | 0.01 | 98.84 |
| Rikenella_OTU#751      | 0.00 | 0.02 | 0.00 | 0.00 | 0.01 | 98.85 |
| Paludibacter_OTU#374   | 0.00 | 0.00 | 0.00 | 0.02 | 0.01 | 98.86 |
| Bulleidia_OTU#187      | 0.00 | 0.00 | 0.00 | 0.02 | 0.01 | 98.86 |
| Paludibacter_OTU#747   | 0.00 | 0.02 | 0.00 | 0.00 | 0.01 | 98.87 |
| Limibacter_OTU#746     | 0.00 | 0.02 | 0.00 | 0.00 | 0.01 | 98.88 |
| Paludibacter_OTU#373   | 0.00 | 0.00 | 0.00 | 0.02 | 0.01 | 98.88 |
| Limibacter_OTU#745     | 0.00 | 0.02 | 0.00 | 0.00 | 0.01 | 98.89 |
| Limibacter_OTU#744     | 0.00 | 0.02 | 0.00 | 0.00 | 0.01 | 98.90 |
| Barnesiella_OTU#372    | 0.00 | 0.00 | 0.00 | 0.02 | 0.01 | 98.90 |
| Paludibacter_OTU#742   | 0.00 | 0.02 | 0.00 | 0.00 | 0.01 | 98.91 |
| Paludibacter_OTU#371   | 0.00 | 0.00 | 0.00 | 0.02 | 0.01 | 98.92 |
| Paludibacter_OTU#741   | 0.00 | 0.02 | 0.00 | 0.00 | 0.01 | 98.93 |
| Helicobacter_OTU#739   | 0.00 | 0.02 | 0.00 | 0.00 | 0.01 | 98.93 |
| Paludibacter_OTU#736   | 0.00 | 0.02 | 0.00 | 0.00 | 0.01 | 98.94 |
| Paludibacter_OTU#368   | 0.00 | 0.00 | 0.00 | 0.02 | 0.01 | 98.95 |
| Anaerophaga_OTU#733    | 0.00 | 0.02 | 0.00 | 0.00 | 0.01 | 98.95 |
| Rikenella_OTU#731      | 0.00 | 0.02 | 0.00 | 0.00 | 0.01 | 98.96 |
| Limibacter_OTU#730     | 0.00 | 0.02 | 0.00 | 0.00 | 0.01 | 98.97 |
| Parasutterella_OTU#365 | 0.00 | 0.00 | 0.00 | 0.02 | 0.01 | 98.97 |
| Paludibacter_OTU#729   | 0.00 | 0.02 | 0.00 | 0.00 | 0.01 | 98.98 |
| Tannerella_OTU#728     | 0.00 | 0.02 | 0.00 | 0.00 | 0.01 | 98.99 |
| Paludibacter_OTU#364   | 0.00 | 0.00 | 0.00 | 0.02 | 0.01 | 99.00 |
| Limibacter_OTU#727     | 0.00 | 0.02 | 0.00 | 0.00 | 0.01 | 99.00 |
| Limibacter_OTU#726     | 0.00 | 0.02 | 0.00 | 0.00 | 0.01 | 99.01 |
| Paludibacter_OTU#363   | 0.00 | 0.00 | 0.00 | 0.02 | 0.01 | 99.02 |
| Parasutterella_OTU#725 | 0.00 | 0.02 | 0.00 | 0.00 | 0.01 | 99.02 |
| Paludibacter_OTU#724   | 0.00 | 0.02 | 0.00 | 0.00 | 0.01 | 99.03 |
| Anaerovorax_OTU#723    | 0.00 | 0.02 | 0.00 | 0.00 | 0.01 | 99.04 |

Supplementary Table 6

|                         |      |      |      |      |      |       |
|-------------------------|------|------|------|------|------|-------|
| Paludibacter_OTU#722    | 0.00 | 0.02 | 0.00 | 0.00 | 0.01 | 99.04 |
| Anaerophaga_OTU#361     | 0.00 | 0.00 | 0.00 | 0.02 | 0.01 | 99.05 |
| Hallella_OTU#721        | 0.00 | 0.02 | 0.00 | 0.00 | 0.01 | 99.06 |
| Paludibacter_OTU#180    | 0.00 | 0.00 | 0.00 | 0.02 | 0.01 | 99.07 |
| Limibacter_OTU#719      | 0.00 | 0.02 | 0.00 | 0.00 | 0.01 | 99.07 |
| Paludibacter_OTU#718    | 0.00 | 0.02 | 0.00 | 0.00 | 0.01 | 99.08 |
| Paludibacter_OTU#359    | 0.00 | 0.00 | 0.00 | 0.02 | 0.01 | 99.09 |
| Paludibacter_OTU#716    | 0.00 | 0.02 | 0.00 | 0.00 | 0.01 | 99.09 |
| Lachnobacterium_OTU#179 | 0.00 | 0.00 | 0.00 | 0.02 | 0.01 | 99.10 |
| Limibacter_OTU#715      | 0.00 | 0.02 | 0.00 | 0.00 | 0.01 | 99.11 |
| Paludibacter_OTU#714    | 0.00 | 0.02 | 0.00 | 0.00 | 0.01 | 99.11 |
| Paludibacter_OTU#713    | 0.00 | 0.02 | 0.00 | 0.00 | 0.01 | 99.12 |
| Paludibacter_OTU#710    | 0.00 | 0.02 | 0.00 | 0.00 | 0.01 | 99.13 |
| Paludibacter_OTU#354    | 0.00 | 0.00 | 0.00 | 0.02 | 0.01 | 99.14 |
| Paludibacter_OTU#707    | 0.00 | 0.02 | 0.00 | 0.00 | 0.01 | 99.14 |
| Parasutterella_OTU#706  | 0.00 | 0.02 | 0.00 | 0.00 | 0.01 | 99.15 |
| Paludibacter_OTU#352    | 0.00 | 0.00 | 0.00 | 0.02 | 0.01 | 99.16 |
| Hallella_OTU#176        | 0.00 | 0.00 | 0.00 | 0.02 | 0.01 | 99.16 |
| Barnesiella_OTU#702     | 0.00 | 0.02 | 0.00 | 0.00 | 0.01 | 99.17 |
| Paludibacter_OTU#351    | 0.00 | 0.00 | 0.00 | 0.02 | 0.01 | 99.18 |
| Barnesiella_OTU#348     | 0.00 | 0.00 | 0.00 | 0.02 | 0.01 | 99.19 |
| Limibacter_OTU#347      | 0.00 | 0.00 | 0.00 | 0.02 | 0.01 | 99.19 |
| Limibacter_OTU#173      | 0.00 | 0.00 | 0.00 | 0.02 | 0.01 | 99.20 |
| Enterorhabdus_OTU#345   | 0.00 | 0.00 | 0.00 | 0.02 | 0.01 | 99.21 |
| Rikenella_OTU#172       | 0.00 | 0.00 | 0.00 | 0.02 | 0.01 | 99.21 |
| Limibacter_OTU#343      | 0.00 | 0.00 | 0.00 | 0.02 | 0.01 | 99.22 |
| Limibacter_OTU#171      | 0.00 | 0.00 | 0.00 | 0.02 | 0.01 | 99.23 |
| Paludibacter_OTU#341    | 0.00 | 0.00 | 0.00 | 0.02 | 0.01 | 99.23 |
| Paludibacter_OTU#168    | 0.00 | 0.00 | 0.00 | 0.02 | 0.01 | 99.24 |
| Paludibacter_OTU#334    | 0.00 | 0.00 | 0.00 | 0.02 | 0.01 | 99.25 |

Supplementary Table 6

|                         |      |      |      |      |      |       |
|-------------------------|------|------|------|------|------|-------|
| Lactobacillus_OTU#167   | 0.00 | 0.00 | 0.00 | 0.02 | 0.01 | 99.26 |
| Paludibacter_OTU#333    | 0.00 | 0.00 | 0.00 | 0.02 | 0.01 | 99.26 |
| Tannerella_OTU#332      | 0.00 | 0.00 | 0.00 | 0.02 | 0.01 | 99.27 |
| Barnesiella_OTU#166     | 0.00 | 0.00 | 0.00 | 0.02 | 0.01 | 99.28 |
| Anaerophaga_OTU#1326    | 0.00 | 0.02 | 0.00 | 0.00 | 0.01 | 99.28 |
| Anaerophaga_OTU#1324    | 0.00 | 0.02 | 0.00 | 0.00 | 0.01 | 99.29 |
| Paludibacter_OTU#331    | 0.00 | 0.00 | 0.00 | 0.02 | 0.01 | 99.30 |
| Rikenella_OTU#1323      | 0.00 | 0.02 | 0.00 | 0.00 | 0.01 | 99.30 |
| Parasutterella_OTU#1322 | 0.00 | 0.02 | 0.00 | 0.00 | 0.01 | 99.31 |
| Pseudozobellia_OTU#330  | 0.00 | 0.00 | 0.00 | 0.02 | 0.01 | 99.32 |
| Rikenella_OTU#328       | 0.00 | 0.00 | 0.00 | 0.02 | 0.01 | 99.33 |
| Paludibacter_OTU#327    | 0.00 | 0.00 | 0.00 | 0.02 | 0.01 | 99.33 |
| Butyricimonas_OTU#325   | 0.00 | 0.00 | 0.00 | 0.02 | 0.01 | 99.34 |
| Barnesiella_OTU#324     | 0.00 | 0.00 | 0.00 | 0.02 | 0.01 | 99.35 |
| Allobaculum_OTU#162     | 0.00 | 0.00 | 0.00 | 0.02 | 0.01 | 99.35 |
| Limibacter_OTU#323      | 0.00 | 0.00 | 0.00 | 0.02 | 0.01 | 99.36 |
| Limibacter_OTU#322      | 0.00 | 0.00 | 0.00 | 0.02 | 0.01 | 99.37 |
| Paludibacter_OTU#160    | 0.00 | 0.00 | 0.00 | 0.02 | 0.01 | 99.37 |
| Allobaculum_OTU#315     | 0.00 | 0.00 | 0.00 | 0.02 | 0.01 | 99.38 |
| Comamonas_OTU#1256      | 0.00 | 0.00 | 0.00 | 0.02 | 0.01 | 99.39 |
| Acinetobacter_OTU#1254  | 0.00 | 0.00 | 0.00 | 0.02 | 0.01 | 99.40 |
| Anaerostipes_OTU#1252   | 0.00 | 0.00 | 0.00 | 0.02 | 0.01 | 99.40 |
| Dichelobacter_OTU#313   | 0.00 | 0.02 | 0.00 | 0.00 | 0.01 | 99.41 |
| Roseburia_OTU#1251      | 0.00 | 0.00 | 0.00 | 0.02 | 0.01 | 99.42 |
| Anaerotruncus_OTU#1250  | 0.00 | 0.00 | 0.00 | 0.02 | 0.01 | 99.42 |
| Paludibacter_OTU#1249   | 0.00 | 0.00 | 0.00 | 0.02 | 0.01 | 99.43 |
| Tumebacillus_OTU#1246   | 0.00 | 0.00 | 0.00 | 0.02 | 0.01 | 99.44 |
| Limibacter_OTU#1245     | 0.00 | 0.00 | 0.00 | 0.02 | 0.01 | 99.45 |
| Tumebacillus_OTU#1244   | 0.00 | 0.00 | 0.00 | 0.02 | 0.01 | 99.45 |
| Limibacter_OTU#311      | 0.00 | 0.02 | 0.00 | 0.00 | 0.01 | 99.46 |

Supplementary Table 6

|                            |      |      |      |      |      |       |
|----------------------------|------|------|------|------|------|-------|
| Sporacetigenium_OTU#1243   | 0.00 | 0.00 | 0.00 | 0.02 | 0.01 | 99.47 |
| Burkholderia_OTU#1240      | 0.00 | 0.00 | 0.00 | 0.02 | 0.01 | 99.47 |
| Propionibacterium_OTU#1253 | 0.00 | 0.00 | 0.00 | 0.02 | 0.01 | 99.48 |
| Paludibacter_OTU#310       | 0.00 | 0.02 | 0.00 | 0.00 | 0.01 | 99.49 |
| Roseburia_OTU#1255         | 0.00 | 0.00 | 0.00 | 0.02 | 0.01 | 99.49 |
| Salinibacterium_OTU#155    | 0.00 | 0.00 | 0.00 | 0.02 | 0.01 | 99.50 |
| Butyrivibrio_OTU#1239      | 0.00 | 0.00 | 0.00 | 0.02 | 0.01 | 99.51 |
| Anaerotruncus_OTU#1238     | 0.00 | 0.00 | 0.00 | 0.02 | 0.01 | 99.52 |
| Corynebacterium_OTU#1237   | 0.00 | 0.00 | 0.00 | 0.02 | 0.01 | 99.52 |
| Corynebacterium_OTU#1236   | 0.00 | 0.00 | 0.00 | 0.02 | 0.01 | 99.53 |
| Lachnobacterium_OTU#1235   | 0.00 | 0.00 | 0.00 | 0.02 | 0.01 | 99.54 |
| Tannerella_OTU#1234        | 0.00 | 0.02 | 0.00 | 0.00 | 0.01 | 99.54 |
| Rikenella_OTU#1233         | 0.00 | 0.02 | 0.00 | 0.00 | 0.01 | 99.55 |
| Rikenella_OTU#308          | 0.00 | 0.02 | 0.00 | 0.00 | 0.01 | 99.56 |
| Parasutterella_OTU#1231    | 0.00 | 0.02 | 0.00 | 0.00 | 0.01 | 99.56 |
| Paludibacter_OTU#1230      | 0.00 | 0.02 | 0.00 | 0.00 | 0.01 | 99.57 |
| Paludibacter_OTU#1228      | 0.00 | 0.02 | 0.00 | 0.00 | 0.01 | 99.58 |
| Rikenella_OTU#1227         | 0.00 | 0.02 | 0.00 | 0.00 | 0.01 | 99.59 |
| Anaerophaga_OTU#1226       | 0.00 | 0.02 | 0.00 | 0.00 | 0.01 | 99.59 |
| Limibacter_OTU#1225        | 0.00 | 0.02 | 0.00 | 0.00 | 0.01 | 99.60 |
| Anaerophaga_OTU#1224       | 0.00 | 0.02 | 0.00 | 0.00 | 0.01 | 99.61 |
| Paludibacter_OTU#1223      | 0.00 | 0.02 | 0.00 | 0.00 | 0.01 | 99.61 |
| Paludibacter_OTU#1222      | 0.00 | 0.02 | 0.00 | 0.00 | 0.01 | 99.62 |
| Helicobacter_OTU#1221      | 0.00 | 0.02 | 0.00 | 0.00 | 0.01 | 99.63 |
| Paludibacter_OTU#305       | 0.00 | 0.02 | 0.00 | 0.00 | 0.01 | 99.63 |
| Paludibacter_OTU#152       | 0.00 | 0.00 | 0.00 | 0.02 | 0.01 | 99.64 |
| Paludibacter_OTU#303       | 0.00 | 0.02 | 0.00 | 0.00 | 0.01 | 99.65 |
| Paludibacter_OTU#302       | 0.00 | 0.02 | 0.00 | 0.00 | 0.01 | 99.66 |
| Paludibacter_OTU#151       | 0.00 | 0.00 | 0.00 | 0.02 | 0.01 | 99.66 |
| Rikenella_OTU#299          | 0.00 | 0.02 | 0.00 | 0.00 | 0.01 | 99.67 |

Supplementary Table 6

|                          |      |      |      |      |      |       |
|--------------------------|------|------|------|------|------|-------|
| Limibacter_OTU#297       | 0.00 | 0.02 | 0.00 | 0.00 | 0.01 | 99.68 |
| Rikenella_OTU#295        | 0.00 | 0.02 | 0.00 | 0.00 | 0.01 | 99.68 |
| Paludibacter_OTU#294     | 0.00 | 0.02 | 0.00 | 0.00 | 0.01 | 99.69 |
| Paludibacter_OTU#291     | 0.00 | 0.02 | 0.00 | 0.00 | 0.01 | 99.70 |
| Robinsoniella_OTU#290    | 0.00 | 0.02 | 0.00 | 0.00 | 0.01 | 99.70 |
| Anaerophaga_OTU#289      | 0.00 | 0.02 | 0.00 | 0.00 | 0.01 | 99.71 |
| Paludibacter_OTU#285     | 0.00 | 0.02 | 0.00 | 0.00 | 0.01 | 99.72 |
| Anaerophaga_OTU#284      | 0.00 | 0.02 | 0.00 | 0.00 | 0.01 | 99.73 |
| Barnesiella_OTU#282      | 0.00 | 0.02 | 0.00 | 0.00 | 0.01 | 99.73 |
| Paludibacter_OTU#141     | 0.00 | 0.00 | 0.00 | 0.02 | 0.01 | 99.74 |
| Paludibacter_OTU#281     | 0.00 | 0.02 | 0.00 | 0.00 | 0.01 | 99.75 |
| Dichelobacter_OTU#279    | 0.00 | 0.02 | 0.00 | 0.00 | 0.01 | 99.75 |
| Limibacter_OTU#273       | 0.00 | 0.02 | 0.00 | 0.00 | 0.01 | 99.76 |
| Anaerophaga_OTU#271      | 0.00 | 0.02 | 0.00 | 0.00 | 0.01 | 99.77 |
| Tannerella_OTU#269       | 0.00 | 0.02 | 0.00 | 0.00 | 0.01 | 99.78 |
| Barnesiella_OTU#268      | 0.00 | 0.02 | 0.00 | 0.00 | 0.01 | 99.78 |
| Paludibacter_OTU#134     | 0.00 | 0.00 | 0.00 | 0.02 | 0.01 | 99.79 |
| Dichelobacter_OTU#264    | 0.00 | 0.02 | 0.00 | 0.00 | 0.01 | 99.80 |
| Paludibacter_OTU#1053    | 0.00 | 0.00 | 0.00 | 0.02 | 0.01 | 99.80 |
| Anaerophaga_OTU#1052     | 0.00 | 0.00 | 0.00 | 0.02 | 0.01 | 99.81 |
| Helicobacter_OTU#1051    | 0.00 | 0.00 | 0.00 | 0.02 | 0.01 | 99.82 |
| Mucispirillum_OTU#1050   | 0.00 | 0.00 | 0.00 | 0.02 | 0.01 | 99.82 |
| Anaerophaga_OTU#1049     | 0.00 | 0.00 | 0.00 | 0.02 | 0.01 | 99.83 |
| Paludibacter_OTU#1048    | 0.00 | 0.00 | 0.00 | 0.02 | 0.01 | 99.84 |
| Limibacter_OTU#131       | 0.00 | 0.00 | 0.00 | 0.02 | 0.01 | 99.85 |
| Paludibacter_OTU#1047    | 0.00 | 0.00 | 0.00 | 0.02 | 0.01 | 99.85 |
| Syntrophococcus_OTU#1046 | 0.00 | 0.00 | 0.00 | 0.02 | 0.01 | 99.86 |
| Anaerophaga_OTU#1045     | 0.00 | 0.00 | 0.00 | 0.02 | 0.01 | 99.87 |
| Paludibacter_OTU#1043    | 0.00 | 0.00 | 0.00 | 0.02 | 0.01 | 99.87 |
| Salinihabitans_OTU#1041  | 0.00 | 0.00 | 0.00 | 0.02 | 0.01 | 99.88 |

Supplementary Table 6

|                          |      |      |      |      |      |        |
|--------------------------|------|------|------|------|------|--------|
| Barnesiella_OTU#260      | 0.00 | 0.02 | 0.00 | 0.00 | 0.01 | 99.89  |
| Paludibacter_OTU#130     | 0.00 | 0.00 | 0.00 | 0.02 | 0.01 | 99.89  |
| Eubacterium_OTU#1039     | 0.00 | 0.00 | 0.00 | 0.02 | 0.01 | 99.90  |
| Alloiococcus_OTU#1038    | 0.00 | 0.00 | 0.00 | 0.02 | 0.01 | 99.91  |
| Barnesiella_OTU#1036     | 0.00 | 0.00 | 0.00 | 0.02 | 0.01 | 99.92  |
| Roseburia_OTU#1035       | 0.00 | 0.00 | 0.00 | 0.02 | 0.01 | 99.92  |
| Roseburia_OTU#1034       | 0.00 | 0.00 | 0.00 | 0.02 | 0.01 | 99.93  |
| Paludibacter_OTU#1033    | 0.00 | 0.00 | 0.00 | 0.02 | 0.01 | 99.94  |
| Anaerophaga_OTU#1032     | 0.00 | 0.00 | 0.00 | 0.02 | 0.01 | 99.94  |
| Parasutterella_OTU#258   | 0.00 | 0.02 | 0.00 | 0.00 | 0.01 | 99.95  |
| Limibacter_OTU#1031      | 0.00 | 0.00 | 0.00 | 0.02 | 0.01 | 99.96  |
| Paludibacter_OTU#1030    | 0.00 | 0.00 | 0.00 | 0.02 | 0.01 | 99.96  |
| Paludibacter_OTU#1028    | 0.00 | 0.00 | 0.00 | 0.02 | 0.01 | 99.97  |
| Paludibacter_OTU#1027    | 0.00 | 0.02 | 0.00 | 0.00 | 0.01 | 99.98  |
| Asaccharobacter_OTU#1325 | 0.00 | 0.02 | 0.00 | 0.00 | 0.01 | 99.99  |
| Paludibacter_OTU#1026    | 0.00 | 0.02 | 0.00 | 0.00 | 0.01 | 99.99  |
| Anaerophaga_OTU#1024     | 0.00 | 0.02 | 0.00 | 0.00 | 0.01 | 100.00 |
